# Supplementary material for: Type I interferon signaling in microglia drives synaptic engulfment and neuronal loss following traumatic brain injury
Source: Research Square preprint supplement (doi:10.21203/rs.3.rs-9785030/v1), 2026-06-06
Supplement: Supplementary file 1 [file 46edeabdb40f24917f06ecd7.xlsx]

## Sheet: Cluster 1 DEGs
UPREGULATED
Gene name	cluster 1 Average	cluster 1 Log2 Fold Change	cluster 1 P-Value		cluster 2 Average	cluster 2 Log2 Fold Change	cluster 2 P-Value		cluster 3 Average	cluster 3 Log2 Fold Change	cluster 3 P-Value		cluster 4 Average	cluster 4 Log2 Fold Change	cluster 4 P-Value		cluster 5 Average	cluster 5 Log2 Fold Change	cluster 5 P-Value		cluster 6 Average	cluster 6 Log2 Fold Change	cluster 6 P-Value		cluster 7 Average	cluster 7 Log2 Fold Change	cluster 7 P-Value		cluster 8 Average	cluster 8 Log2 Fold Change	cluster 8 P-Value		cluster 9 Average	cluster 9 Log2 Fold Change	cluster 9 P-Value		cluster 10 Average	cluster 10 Log2 Fold Change	cluster 10 P-Value
Gm7480	0.3909640216600365	3.2095776672041145	1.8410119573198606e-23		0.043251541823928825	-0.913038	0.024991429172666856		0.05249	-0.55203	0.3645417421302384		0.018713993554310426	-2.13564	1.1558795682730122e-07		0.00671234	-3.46207	1.5292455741857834e-06		0.14396210753470387	1.0697557184614417	1		0.21155893705037015	1.6314517190499975	1		0.041124944416720495	-0.803847	0.8977784870286771		0.11471421539649986	0.8073372293446401	1		0.00271228	-3.72618	1
Gm43221	1.224975507311983	3.067850576286941	2.508594189048555e-22		0.20504802052766258	-0.262488	0.9465191340267941		0.0849943	-1.74465	4.785086651497149e-08		0.1275819084377195	-1.02101	0.0404933		0.061021298507186496	-2.039	0.00455203		0.6242107006387551	1.4747909909610009	0.9797692992332144		0.3414635475198957	0.5567536556717412	1		0.0892712	-1.43792	0.2348447290507762		0.11471421539649986	-0.923491	1		0.010849108755393702	-4.13062	1
Gm36992	0.27259256181486974	3.0833719134259585	7.210403249908571e-21		0.043053140255929156	-0.359333	0.9448791311794316		0.023499715792642855	-1.38179	0.000117643		0.0277739	-1.04127	0.056684208284519685		0.00976341	-2.47932	0.00102235		0.14958562736027822	1.6063636798326928	0.9797692992332144		0.0482503	-0.0552994	1		0.017553329933966064	-1.57927	0.20750175101015275		0.020857130072090883	-0.747831	1		0.00271228	-3.27646	1
Gm17130	0.13832550593335202	3.14904	2.416612509878601e-19		0.021328168559964902	-0.354178	0.9457605653410784		0.012518540188604137	-1.25547	0.00210358		0.011733376911035901	-1.28247	0.0181219		0.0045766	-2.51031	0.00414241		0.0528611	1.1087300017670731	1		0.025980922093905106	0.11321882933055338	1		0.015547235084369943	-0.712584	1		0.010428565036045442	-0.318052	1		0	-3.26251	1
Gm12227	0.17417514805788825	3.0170537542407443	2.9910857198838316e-18		0.029859435983950865	-0.253381	0.9799111696163385		0.015154	-1.4068	0.000228918		0.013961233286549047	-1.45553	0.00239036		0.00884809	-1.99973	0.021587		0.091101	1.4973891847915795	0.9797692992332144		0.0482503	0.562885	1		0.019057901071163157	-0.838184	0.908891		0.020857130072090883	-0.139523	1		0.00813683	-1.6662	1
Gm31224	0.0676408	3.2458932075420472	5.979624727478274e-17		0.0101185	-0.336877	0.9518771768975589		0.00505134	-1.49206	0.0014185		0.00594095	-1.15363	0.12884827461041468		0.00244085	-2.25391	0.048173866176419354		0.024743487232527225	1.1300812860120466	1		0.00742312	-0.397077	1		0.00601828	-0.937719	0.9252592394039509		0.020857130072090883	1.3553485938929049	1		0	-2.17913	1
Gm20528	1.6179687539979366	2.7376022977377383	6.622071142451982e-17		0.3267673824954623	-0.165285	0.9925461524413124		0.20062607828578738	-1.02243	0.00340753		0.18610026923453143	-1.08222	0.015301475347336536		0.08604	-2.1471	0.00220456		0.9053866919174735	1.4069	0.9797692992332144		0.5121953212798436	0.5395162432639605	1		0.13440835492294015	-1.44974	0.2259861222871899		0.16685704057672707	-1.02035	1		0.00813683	-5.05217	1
Pard3bos1	0.7792224099521835	2.7464939969125517	1.0907678313684731e-16		0.16883973436772218	-0.0191403	1		0.0732444	-1.47162	9.53127159163767e-06		0.10515482092422049	-0.817401	0.2238936105596063		0.0500375	-1.85909	0.014336472666275881		0.41726517105761823	1.3470404361065704	0.9797692992332144		0.14475085166604273	-0.224006	1		0.073724	-1.24789	0.4176428995313044		0.0417143	-1.72731	1		0	-5.99307	0.9948635146544889
Gm15632	0.13426705588151774	2.901040865342866	1.635616937221801e-16		0.023808188159960823	-0.278977	0.9589815792248374		0.013836281261088785	-1.20683	0.00269726		0.010545186844095557	-1.55688	0.00103634		0.00762766	-1.89743	0.0372162		0.0764799	1.5587017575638153	0.9797692992332144		0.031548262542599056	0.27840591176620233	1		0.0230701	-0.239472	1		0.020857130072090883	0.16747893744250675	1		0	-3.36329	1
Gm15243	0.1315614225136282	2.8814617133820395	4.534773242904669e-16		0.023212983455961803	-0.303807	0.9497608992383919		0.016142328137936916	-0.930077	0.0388878		0.013218614494711333	-1.18723	0.033297299564205754		0.00518681	-2.42197	0.00506694		0.0663575	1.3617545113685021	0.9797692992332144		0.024125141944340456	-0.0722901	1		0.015547235084369943	-0.798624	0.9489055242279134		0.010428565036045442	-0.40138	1		0	-3.34575	1
Gm26827	2.031930659285034	2.667032941011625	4.636917618447191e-16		0.4271585759032971	-0.147503	1		0.22247861773782443	-1.28071	8.93091108551974e-05		0.2946711366012054	-0.757631	0.2435621147620336		0.16384218649179574	-1.57819	0.048938		1.035852351870799	1.2163922372587168	0.9902133188032591		0.6346768111511105	0.4732197003341748	1		0.22317805201756855	-1.08483	0.544634		0.20857130072090882	-1.0888	1		0.00271228	-6.42566	0.7895754677083887
Gm31172	0.0683172	3.104526563088101	4.636917618447191e-16		0.00892807	-0.682154	0.47690159423451656		0.00779663	-0.89141	0.11051219319013342		0.00490128	-1.54894	0.00841851		0.00152553	-2.94266	0.00467377		0.0427388	1.847422088650423	0.9797692992332144		0.025980922093905106	1.1259298810801068	1		0.00501524	-1.2803	0.6351221269094321		0.020857130072090883	1.2622391895014227	1		0	-2.27182	1
Gm34408	1.514140073505176	2.659846326145992	5.977027589640973e-16		0.341548	-0.0147735	1		0.15274815265217856	-1.41947	9.026853369114552e-06		0.2193695911088611	-0.76423	0.23577666447337464		0.12600898141734013	-1.53506	0.0630088		0.9739936337894808	1.5693945353407237	0.9797692992332144		0.28022280258426224	-0.293584	1		0.084256	-2.08469	0.0195777		0.0938571	-1.74017	1		0.0189859	-4.00522	1
Gm36328	0.040922704689329084	3.448537818162178	9.82103549271319e-16		0.00535684	-0.438963	0.9457605653410784		0.00263548	-1.58619	0.00452191		0.00267343	-1.46314	0.0790102		0.00122043	-2.27594	0.13922160560426286		0.013496447581378487	1.1335618547470094	1		0.00742312	0.44228310549954397	1		0.00351067	-0.807707	1		0.010428565036045442	1.5986197449052684	1		0	-1.35015	1
Gm13748	0.0744049	3.0523188041906484	1.0814823367272843e-15		0.012796901135978943	-0.216618	0.9928902184098962		0.00582002	-1.54183	0.000482321		0.00653505	-1.27507	0.0468715		0.00335617	-2.07988	0.059312557537443654		0.041614046709250334	1.641521285862865	0.9797692992332144		0.014846241196517205	0.21478981247023032	1		0.00601828	-1.18939	0.6962315906364989		0.020857130072090883	1.1089929292057414	1		0.00271228	-1.42166	1
9130019P16Rik	0.9202535492534251	2.6547359424011696	1.2096304027557767e-15		0.20941285502365542	-0.00168213	1		0.10585853282293324	-1.20774	0.000326353		0.11852195917729935	-0.958511	0.0722573		0.0552243	-2.01964	0.00549228		0.4948697446505445	1.291270906479682	0.9797692992332144		0.21155893705037015	0.023233623705378736	1		0.10682455074099348	-1.00753	0.6597330582996821		0.13557134546859073	-0.53831	1		0	-6.29104	0.8785809775454395
Gm50368	0.11904786818713915	2.9136861369951084	2.072161375113115e-15		0.023212983455961803	-0.0852725	1		0.013726469505048397	-1.01102	0.028429914179905202		0.00891143	-1.61987	0.00141722		0.00579702	-2.10023	0.0279421		0.050611678430169324	1.1283441454759897	1		0.031548262542599056	0.4626289281906244	1		0.011033521672778669	-1.12137	0.7249987450179122		0	-1.23953	1		0.00271228	-2.18078	1
Gm28940	0.0953736	2.907143819386076	2.0911675706658338e-15		0.0162689	-0.345853	0.9457605653410784		0.010761552091957944	-1.04944	0.0214894		0.00980257	-1.12951	0.0756917		0.00610213	-1.70454	0.12791095296081328		0.0427388	1.2095107079803071	1		0.018557801495646505	0.059858013945812694	1		0.0120366	-0.672375	1		0.010428565036045442	0.0778768	1		0	-2.86707	1
Gm48708	0.26684309090810454	2.6872288421530315	2.0911675706658338e-15		0.0517828	-0.283293	0.9497608992383919		0.034480891396681576	-0.987387	0.011691740411854641		0.0319326	-1.04959	0.0496215		0.0195268	-1.69075	0.048938		0.1642067789067716	1.5265950776103558	0.9797692992332144		0.057529184636504166	-0.0174195	1		0.0391188	-0.627506	1		0.010428565036045442	-1.54156	1		0	-4.48512	1
Tg	0.9134894658337013	2.62042	2.0911675706658338e-15		0.21804332323164122	0.0637273	1		0.10388192121420627	-1.25188	0.000152232		0.11525443649321342	-1.01619	0.0421928		0.0591907	-1.92927	0.00813127		0.517364	1.3471721245667507	0.9797692992332144		0.28950170333208547	0.4688790816358033	1		0.0857606	-1.34263	0.310988		0.0938571	-1.03593	1		0.010849108755393702	-3.97977	1
Gm17590	0.18770331489733588	2.730620600325699	2.1212489229300086e-15		0.0398787	-0.0708363	1		0.018228751502704272	-1.42479	9.736718703617618e-05		0.021535944963293745	-1.08389	0.047323525461357784		0.011594046716365434	-1.89941	0.0252106		0.0764799	0.9362778820010922	1		0.0352598	-0.163395	1		0.0486478	0.2618203924204723	1		0.010428565036045442	-1.00681	1		0	-3.95067	1
Gm47551	0.36898075054593416	2.661209457230581	2.1212489229300086e-15		0.0794598	-0.104895	1		0.0508428	-0.89901	0.024034772043392005		0.046042365093938345	-1.00255	0.0612099		0.021662560970051207	-2.03607	0.00715788		0.2024467137206773	1.3306419040297461	0.9797692992332144		0.0779428	-0.0756136	1		0.030091422743941824	-1.50846	0.22152045206873033		0.020857130072090883	-1.44011	1		0.00271228	-3.96845	1
Uchl4	0.2637992533692288	2.6633567618893768	4.124832987469406e-15		0.055354037471908916	-0.153413	1		0.0353594	-0.943372	0.018279024054052115		0.031487036773919126	-1.07051	0.0413383		0.017086	-1.88435	0.0197566		0.1293409559882105	1.1642883703792717	0.9862338045678373		0.0723754	0.31129779332357677	1		0.0361097	-0.74423	0.9531470642167186		0.0417143	-0.216286	1		0	-4.48379	1
Gm17108	0.0703465	2.9430163838986756	7.174516557950058e-15		0.011209688591981555	-0.442715	0.9090570267072099		0.00812607	-0.981595	0.0515539		0.00608947	-1.36545	0.0238277		0.00518681	-1.46036	0.3156497604398201		0.0359905	1.4409903799392554	0.9797692992332144		0.0092789	-0.361661	1		0.010531997960379638	-0.386988	1		0	-0.464742	1		0	-2.40764	1
4930565N06Rik	0.15997057287646824	2.715903150881857	8.224435848440737e-15		0.0318435	-0.20983	0.9873670243337859		0.021962351208077435	-0.861391	0.054897049897883445		0.017822851004105168	-1.13923	0.0361552		0.00427149	-3.07817	9.228565677115198e-05		0.0955998	1.5069567080233086	0.9797692992332144		0.042682943439986964	0.32841181418742416	1		0.021063995920759276	-0.754371	0.9681696780014757		0.010428565036045442	-0.785543	1		0	-3.72957	1
Lysmd4	10.20936930956014	2.5432990886502593	9.900208328153921e-15		2.423574353900012	-0.0175189	1		1.294680603716165	-1.1301	0.000721162		1.4916241052852348	-0.836654	0.12979211333165347		0.7505619716383939	-1.80022	0.00734474		6.255603453968929	1.4121012228454446	0.9797692992332144		2.182397455888029	-0.167599	1		1.1840974849741108	-1.08896	0.3941431416355227		0.803	-1.60518	1		0.0732315	-5.02694	1
Plxna4os3	0.3730392005977684	2.606267285036207	1.1284448031648982e-14		0.0896775	0.0655282	1		0.0341515	-1.6117	1.5953394173165391e-06		0.0625285	-0.56116	0.8051819421435191		0.0283749	-1.69332	0.039367402361639894		0.19569848992998806	1.2247794399013259	0.9797692992332144		0.11505836927300833	0.4329452409202075	1		0.028586851606744734	-1.63476	0.150281		0.0417143	-0.753378	1		0.00271228	-4.01958	1
Insyn2a	0.4173439469969594	2.6047681010265302	1.1284448031648982e-14		0.0880903	-0.193019	0.9873670243337859		0.0516115	-1.12352	0.00201413		0.061488835964162825	-0.775073	0.31193131567236937		0.035087246641632236	-1.54809	0.0791884		0.2283149049183194	1.2867877932475582	0.9797692992332144		0.12619305017039623	0.4008085682926481	1		0.05266	-0.910239	0.7847555664731635		0.0625714	-0.430114	1		0.00271228	-4.18242	1
Tent5d	0.27969484940557976	2.6712601688411093	1.1847228131656113e-14		0.0603141	-0.0932832	1		0.034041644372520025	-1.09957	0.00459932		0.0325267	-1.10665	0.0379193		0.0210523	-1.66086	0.0702278		0.17882793045326495	1.5742060101619186	0.9797692992332144		0.0482503	-0.344806	1		0.030091422743941824	-1.0931	0.6485444974209261		0.010428565036045442	-1.61956	1		0.00271228	-3.56246	1
Gm26626	0.12682656411982154	2.736677421956467	1.2162687631142548e-14		0.025097798351958703	-0.203181	0.9896561974662479		0.016362	-0.949959	0.03136		0.00995109	-1.6657	0.000347005		0.00671234	-2.09796	0.0169022		0.0719811	1.4462714196049924	0.9797692992332144		0.042682943439986964	0.6831331422673514	1		0.0245747	-0.165359	1		0.020857130072090883	0.14867663067822345	1		0.00271228	-2.38062	1
Gm11831	0.077787	2.921705877653263	1.4842186286920163e-14		0.011110487807981717	-0.657531	0.49827867711414225		0.00988306	-0.837725	0.1392572514366373		0.00861438	-0.998354	0.23269641303312982		0.00335617	-2.22332	0.032093		0.0461129	1.64596	0.9797692992332144		0.025980922093905106	0.8245753261552631	1		0.00601828	-1.3331	0.5758704041646342		0.010428565036045442	0.38043957485573454	1		0.00271228	-1.56246	1
Gm26979	0.10416688466374675	2.7438205377424985	1.6513458182304735e-14		0.021328168559964902	-0.130771	1		0.011749857896321428	-1.16657	0.00463331		0.00965404	-1.40174	0.00574072		0.00579702	-2.00992	0.028177003532041806		0.060734	1.496131934131717	0.9797692992332144		0.027836702243469756	0.3792223554567986	1		0.019057901071163157	-0.239823	1		0	-1.15124	1		0.00542455	-1.50567	1
Insyn2b	2.159433631746828	2.5299569989066244	1.753859012911024e-14		0.4584068228632457	-0.247736	0.9567293115069778		0.34634627855138117	-0.741368	0.0644939		0.26392671861912403	-1.13335	0.00818802		0.13211111126805877	-2.07858	0.00282166		1.1134569254637252	1.139640464232029	1		0.7627256414710714	0.5628554374618684	1		0.46240486283190607	-0.178753	1		0.5005711217301811	-0.0411688	1		0.029835	-4.01666	1
4930595D18Rik	0.43425415554626895	2.576918731104148	2.2481254057757742e-14		0.0844199	-0.373341	0.9038014420180197		0.0655576	-0.807815	0.054897669549331785		0.0476761	-1.26665	0.00477592		0.0231881	-2.2328	0.00234686		0.26205602387176563	1.4172952532486387	0.9797692992332144		0.18928957525559437	0.915549	1		0.11183978786498379	0.13979492961379503	1		0.0417143	-0.991828	1		0.00271228	-4.25782	1
Gm10135	0.44507668901782704	2.5699183756254618	2.2871372270255678e-14		0.10009359105583529	-0.100235	1		0.0603965	-0.99461	0.00822274		0.0640137	-0.840114	0.20359503087399144		0.031426	-1.82953	0.018671553853796662		0.2159431613020558	1.0801603493292165	1		0.10392368837562042	0.00290001	1		0.0662011	-0.691155	0.990118		0.052142825180227205	-0.768523	1		0.00542455	-3.71256	1
A930041C12Rik	0.030100171217770977	3.3755250194039252	3.4852099515347335e-14		0.00406723	-0.422952	0.9457605653410784		0.00241586	-1.26962	0.047737565902890786		0.00237638	-1.20011	0.31489852599987067		0.000305106	-3.21039	0.0334824		0.010122335686033865	1.1578094009936857	1		0.00185578	-0.492163	1		0.00250762	-0.821723	1		0.010428565036045442	2.0038762233915266	1		0	-0.946796	1
3200001D21Rik	0.11059276391248438	2.7326123131012925	3.648942775976611e-14		0.021030566207965395	-0.282193	0.9642408007785861		0.012408728432563751	-1.18394	0.00446026		0.0121789	-1.14158	0.0522743		0.0094583	-1.40692	0.26570271903876097		0.0686069	1.5817261336344481	0.9797692992332144		0.0371156	0.685021	1		0.015547235084369943	-0.63476	1		0.010428565036045442	-0.242819	1		0	-3.18736	1
Gpr22	0.0764341	2.8263174752880365	4.293593339061644e-14		0.015276920735974862	-0.107428	1		0.00889475	-1.05249	0.025642876983857883		0.00861438	-1.03446	0.1687772705335529		0.00244085	-2.679	0.00552748		0.0337411	1.1439410005270085	1		0.016702021346081855	0.19372819694240118	1		0.0085259	-0.88412	0.931336		0	-0.654567	1		0	-2.59746	1
4933423P22Rik	0.31791192072701935	2.5558918058382964	5.009268186961426e-14		0.0670597	-0.236568	0.9806662573244912		0.0485368	-0.804335	0.059196		0.0409926	-1.02536	0.0525088		0.0247136	-1.69268	0.041163418600055277		0.14058799563935925	0.9336991225233673	1		0.1466066318156074	0.9888253879068793	1		0.0516569	-0.565601	1		0.0625714	-0.0688984	1		0.00271228	-3.82179	1
Gm11906	0.26887231593402167	2.5733149259173906	5.093623837227821e-14		0.0625957	-0.0285467	1		0.033382773836277704	-1.13934	0.00224805		0.0398044	-0.789001	0.31961284953742886		0.019221709029763747	-1.80054	0.028396414359017328		0.1642067789067716	1.4363972686387774	0.9797692992332144		0.057529184636504166	-0.102889	1		0.0245747	-1.39355	0.32797517910848184		0.0312857	-0.624614	1		0	-4.5694	1
Htr2b	0.18533588570043255	2.617020845430583	5.1751567816154573e-14		0.0407715	-0.101144	1		0.020315174867471628	-1.3101	0.000439793		0.0227241	-1.05848	0.0594144		0.010373620746221704	-2.11482	0.00928506		0.0922257	1.1598731318628563	1		0.0556734	0.4245084037715676	1		0.0466417	0.13995416650075576	1		0.020857130072090883	-0.475037	1		0.027122771888484255	-0.535983	1
Gm26936	0.863435	2.5069326190834467	5.559094272545369e-14		0.2188369295036399	0.0809989	1		0.10827439145582175	-1.17544	0.000478464		0.1252055283038388	-0.87476	0.13695120930714147		0.0628519	-1.83355	0.01431		0.48024859310405116	1.2408228214071502	0.9797692992332144		0.1688759936103832	-0.307585	1		0.13139921264854598	-0.704958	0.9629216132087832		0.0312857	-2.35196	1		0.00271228	-5.29524	1
Gm49915	0.18837972323930827	2.603485610772371	5.596485171675473e-14		0.038093101055937315	-0.275464	0.9567293115069778		0.024378209840965955	-1.04624	0.00806275		0.0258431	-0.888451	0.19536702602519446		0.020442134999907477	-1.15855	0.4072542543595304		0.13496447581378487	1.7066502551798726	0.9797692992332144		0.038971383140857664	-0.111452	1		0.017553329933966064	-1.33404	0.40850027499481906		0.020857130072090883	-0.507314	1		0.00271228	-3.03608	1
4930403D09Rik	0.11262198893840153	2.6725322033131826	5.676758982078808e-14		0.022915381103962292	-0.203644	0.9877207567974727		0.015044210577533043	-0.938127	0.0352085		0.00965404	-1.57188	0.000901955		0.00671234	-1.96441	0.028824989171280083		0.0663575	1.4621846022083793	0.9797692992332144		0.057529184636504166	1.2448023815366698	1		0.0200609	-0.329007	1		0	-1.30866	1		0	-3.25156	1
Gm2245	4.048980335046676	2.4822599210350553	5.676758982078808e-14		0.8700900764625682	-0.266344	0.9457605653410784		0.7389233063957653	-0.55346	0.28173706526379333		0.5253285333459998	-1.0733	0.015282365747547183		0.2745958432823392	-1.96034	0.00549228		2.014344801520739	1.0512860666290853	1		1.5440090844377892	0.641879	1		0.660005	-0.623285	0.9236394028991775		0.7821423777034081	-0.347104	1		0.0433964	-4.45284	1
Kcnip4	0.16369081875731634	2.624065988811209	1.239454843976078e-13		0.0372003	-0.0305978	1		0.022291786476198595	-0.944354	0.028625921009100493		0.0188625	-1.15081	0.034335935651727156		0.00976341	-2.01399	0.018887623121636114		0.0944751	1.3909496974396611	0.9797692992332144		0.033404	-0.107317	1		0.018054853646365096	-1.07243	0.6879887633657847		0.0312857	0.12480633240384442	1		0.00271228	-2.82021	1
4930405A10Rik	0.37675944647861653	2.513655619149193	1.6477954342377377e-13		0.0794598	-0.273882	0.9567293115069778		0.0836766	-0.168426	0.9306287516486914		0.030298846706978782	-1.79396	8.027092046491615e-06		0.010373620746221704	-3.22215	3.2695013904390794e-06		0.22156668112763017	1.3343256656563085	0.9797692992332144		0.10021212807649113	0.15701985719416278	1		0.061185892912681714	-0.597321	1		0.0834285	0.021310816727547977	1		0.00271228	-4.09458	1
Vxn	0.4349305638882413	2.4892005568633393	1.7340382058799452e-13		0.12231456667179873	0.28006854936872294	0.9457605653410784		0.051941	-1.26841	0.000249726		0.0598551	-0.971097	0.0705514		0.033561714178952574	-1.75341	0.0254256		0.2204419771625153	1.0902777570182085	1		0.12062570972170228	0.19753478237213562	1		0.0376143	-1.54117	0.18739998968152632		0.0625714	-0.56578	1		0.00542455	-3.73257	1
Gm16068	0.20021686922382492	2.5482681348651526	1.7430519843414695e-13		0.044442	-0.14446	1		0.027562750766137182	-0.984846	0.013809570878110322		0.027031324022892836	-0.95494	0.11716470897829621		0.010068514253685773	-2.31691	0.0028439		0.13159036391844026	1.5341812948277163	0.9797692992332144		0.059385	0.357394	1		0.0351067	-0.45058	1		0	-2.21796	1		0	-4.16085	1
Scpep1os	0.1498244477468825	2.626948940432556	1.9047120256837208e-13		0.027181014815955272	-0.458368	0.7947601830777077		0.026135197937612147	-0.51347	0.500023		0.015892042145327107	-1.27811	0.013121036084283487		0.011899153208901368	-1.59548	0.12308890678609581		0.0708563	1.094033490560372	1		0.0296925	-0.138934	1		0.033100565018336005	-0.0465441	1		0	-1.74899	1		0	-3.69188	1
Gm48678	3.3377369634627168	2.4390400546672133	2.149999997102219e-13		0.7422202658867787	-0.239284	0.9589815792248374		0.5054635130539021	-0.912219	0.011266897701174812		0.5505775722684821	-0.716605	0.3129724649815822		0.3792473702221641	-1.22125	0.1757608624965517		2.1200669742415372	1.3938959671303561	0.9797692992332144		0.8109759253597523	-0.0485836	1		0.48697952473945855	-0.818522	0.7042453671575325		0.20857130072090882	-1.95507	1		0.027122771888484255	-4.83133	1
Cacna1c	0.1582795520215373	2.577309522633351	2.3372940905807963e-13		0.0368035	-0.0269384	1		0.022401598232238983	-0.914756	0.034062307907464964		0.021832992480028828	-0.897548	0.20071890099686365		0.010373620746221704	-1.90837	0.0268409		0.0674822	0.9044278555315062	1		0.0408272	0.19100355960586501	1		0.018556377358764125	-1.01426	0.7385578959402911		0.0312857	0.14294026112907865	1		0	-3.80317	1
Gm47167	1.1390716478814904	2.4495179332206924	2.3731804213918594e-13		0.25345800311958294	-0.228577	0.9693702973314892		0.16647462215722697	-0.963853	0.0067778		0.18209012775860778	-0.75953	0.2435621147620336		0.12326302298451672	-1.28504	0.20062243047648892		0.723185	1.4019828071278615	0.9797692992332144		0.2765112422851329	-0.0365996	1		0.20010796124721314	-0.531526	1		0.0625714	-1.98227	1		0	-6.73336	0.6994579609143435
Gm15700	0.0537745	2.9046460521679913	2.610609350566073e-13		0.00962248	-0.25427	0.9873670243337859		0.00614946	-1.02059	0.059053591466812765		0.00504981	-1.25669	0.0787727		0.00305106	-1.81949	0.178654		0.019119967406952855	0.8997646701383122	1		0.020413581645211155	1.027990992463522	1		0.00601828	-0.798857	1		0.010428565036045442	0.9022624867648812	1		0	-2.04426	1
Gm4876	0.2019078900787559	2.552768330407379	3.373151275664205e-13		0.0502948	0.0888822	1		0.021632915939956275	-1.39498	0.000148336		0.027476895297995466	-0.938937	0.1455033096082533		0.00854298	-2.55996	0.000990429		0.10572217272079815	1.191225699570194	0.9862338045678373		0.0816543	0.8057050863208088	1		0.039620373279523405	-0.28014	1		0.0312857	-0.22463	1		0.00542455	-2.5834	1
Gm21798	0.2637992533692288	2.5458690435157205	4.779187194467573e-13		0.0705318	0.2284265684137563	0.9612070038438159		0.019326869063108144	-2.00419	9.730288195302958e-09		0.048418745227819034	-0.454294	0.9936495120048627		0.029290223283449518	-1.1692	0.40222969782400797		0.13608917977889975	1.1607520397757467	1		0.0816543	0.40695003238726324	1		0.0100305	-2.65407	0.00591113		0	-2.61703	1		0.00271228	-3.55929	1
Gm26749	0.7778695932682388	2.4324615130233065	5.283829293117624e-13		0.16447489987172936	-0.340675	0.9278099613323431		0.12848	-0.768111	0.0552502		0.11896753045240199	-0.844283	0.17704701317585192		0.0906166	-1.18499	0.2954553253440578		0.5376084953249097	1.5213059520300871	0.9797692992332144		0.15031819211473668	-0.373687	1		0.13741749719733434	-0.533598	1		0.0312857	-2.25122	1		0.013561385944242128	-3.60874	1
B3galt2	0.2888263620222069	2.4709847284817448	5.611470502050695e-13		0.0603141	-0.329774	0.9457605653410784		0.0421677	-0.946917	0.0161595		0.0451512	-0.777168	0.32850893432426054		0.030510649253593248	-1.29633	0.23962277639319612		0.2069455295811368	1.6090583760820905	0.9797692992332144		0.038971383140857664	-0.822151	1		0.0606844	-0.239372	1		0.010428565036045442	-1.79678	1		0.00271228	-3.73967	1
Gm48770	0.0365261	3.07186	6.522372608016903e-13		0.00555524	-0.424522	0.9457605653410784		0.00450228	-0.77123	0.3430032641248502		0.003119	-1.27673	0.1589989944820463		0.000915319	-2.64479	0.0520564		0.012371743616263612	0.9695861196358821	1		0.00371156	-0.347363	1		0.00501524	-0.372221	1		0	0.552264	1		0	-1.39063	1
Gm9968	0.1396783226172968	2.533215532985979	9.37876912360738e-13		0.0313474	-0.135985	1		0.022731033500360147	-0.709602	0.174252		0.018268422279207795	-1.0141	0.0910336		0.0094583	-1.88602	0.031956734494915436		0.0742305	1.2059263706312682	0.9902133188032591		0.0482503	0.5810015304083374	1		0.013039616522374791	-1.36506	0.40010026701823426		0.0312857	0.2944663517458821	1		0.00271228	-2.65081	1
Gm50250	0.27969484940557976	2.44575	9.468234311355368e-13		0.0660677	-0.115679	1		0.043814890660114486	-0.847053	0.041508770692959586		0.0393588	-0.966283	0.0859702		0.023798306417802735	-1.6332	0.059327		0.13608917977889975	1.0018032665761312	1		0.12062570972170228	0.8179973207607723	1		0.050653894952302075	-0.478779	1		0.0417143	-0.443739	1		0	-4.71085	1
Gm26854	0.13934011844631058	2.5351468226903524	1.259482116738881e-12		0.0352163	0.10228125061324711	1		0.016581575162098464	-1.23482	0.00160528		0.0194566	-0.90793	0.20180942087151246		0.00823788	-2.07866	0.015075327351065025		0.0708563	1.1410955274324164	1		0.0352598	0.14440048457883314	1		0.0235716	-0.504272	1		0.020857130072090883	-0.11699	1		0.00271228	-2.64604	1
Gm10974	0.7190220675166415	2.3979983800302147	1.5358263698729117e-12		0.168344	-0.17691	0.9873670243337859		0.13155448373638384	-0.617932	0.19341335125290712		0.10916496240014414	-0.882342	0.13251974255059903		0.0607162	-1.68822	0.030773328550267248		0.45100629001106446	1.3474394532746976	0.9797692992332144		0.2208378377981934	0.275231	1		0.074727	-1.34225	0.315132		0.1251427804325453	-0.45866	1		0.00813683	-4.10395	1
Aknaos	0.10585790551867771	2.566317219607001	1.5529988584700525e-12		0.025891404623957396	0.0649077	1		0.013836281261088785	-1.05427	0.013064439692496217		0.011881900669403445	-1.22833	0.0244892		0.00640724	-2.00911	0.0271026		0.0562352	1.2344452117596703	0.9949994741823867		0.038971383140857664	0.7091162215537139	1		0.015045711371970912	-0.727431	1		0.0312857	0.7166755064269807	1		0	-3.231	1
Gm43376	0.2387721447162507	2.4683609689749604	1.9111750303200197e-12		0.0598181	0.0218442	1		0.0318454	-1.10016	0.00419951		0.038319129658826105	-0.735587	0.4541727633898859		0.0173911	-1.842	0.0276856		0.1473362194300485	1.3792141823525665	0.9797692992332144		0.059385	0.045379232513449885	1		0.028586851606744734	-1.06984	0.6597330582996821		0	-2.52476	1		0	-4.46766	1
Gm13856	0.0686554	2.7047989954005454	1.9111750303200197e-12		0.012400097999979596	-0.399547	0.9455071295329556		0.00867513	-1.00244	0.041550622617229645		0.00920847	-0.840482	0.46598277616084666		0.00335617	-2.17619	0.036122334696619914		0.041614046709250334	1.5401871142096528	0.9797692992332144		0.0296925	1.0579028111517026	1		0.00902743	-0.722308	1		0	-0.575878	1		0.00271228	-1.51616	1
Gm10848	0.8766252111962065	2.363023493544251	3.2677070016055017e-12		0.24373632628759892	0.13280376963221663	1		0.1104706265766295	-1.27836	0.000101008		0.1645643242712377	-0.561206	0.6970929164743312		0.10343110096968111	-1.21561	0.25873682543275434		0.4937450406854296	1.157253770314417	0.9797692992332144		0.2319725186955813	0.0319017	1		0.0752286	-1.64857	0.11760924738496427		0.11471421539649986	-0.884527	1		0.00542455	-4.829	1
4932443L11Rik	0.14745701854997917	2.5085599136235133	3.4119224265682178e-12		0.033331463423945155	-0.144142	1		0.0210839	-0.950387	0.027968		0.0253976	-0.586344	0.8408247711174012		0.00884809	-2.07817	0.0162355		0.0731058	1.083438375321173	1		0.050106064038245565	0.5382341398049721	1		0.018556377358764125	-0.955829	0.8003435618466181		0.010428565036045442	-0.802364	1		0	-3.74637	1
Gm16239	0.0689937	2.783686497695562	3.4119224265682178e-12		0.012300897215979758	-0.359574	0.9457605653410784		0.00757701	-1.17671	0.017011260665578582		0.00980257	-0.691677	0.8149967342321991		0.00579702	-1.37388	0.4337385717679255		0.0281176	1.0039265743304133	1		0.025980922093905106	0.9154417072483536	1		0.00752286	-0.934746	0.9378		0	-0.533521	1		0	-2.47642	1
Gm39214	0.32027934992392265	2.407987146367219	3.4700666707545174e-12		0.0859079	0.10285421963080488	1		0.046120937536962614	-1.02002	0.00706614		0.0479732	-0.894784	0.14720901917210055		0.0210523	-2.03957	0.00725497		0.19344908199975833	1.3008831827865674	0.9797692992332144		0.0723754	-0.143673	1		0.0531615	-0.63654	1		0.010428565036045442	-1.9883	1		0.00271228	-3.9312	1
1700047A11Rik	0.0500542	2.8018864777427908	3.5668164485328125e-12		0.00982088	-0.161429	1		0.00516115	-1.26006	0.010973755857011741		0.00712914	-0.668614	0.8655042956399838		0.00183064	-2.4453	0.030773328550267248		0.0258682	1.3806547167117804	0.9902133188032591		0.011134680897387903	0.27292598245105815	1		0.00401219	-1.30297	0.6597330582996821		0.010428565036045442	0.9428006466397587	1		0	-2.00383	1
Pard3bos3	0.0673026	2.7053761888632906	4.221171403152815e-12		0.0177569	0.35266743760126307	0.9457605653410784		0.00494153	-1.86917	1.2977622728267186e-05		0.00831733	-0.970105	0.2793239041152408		0.00671234	-1.17781	0.5424493029976476		0.0202447	0.5179913680954567	1		0.016702021346081855	0.30315462001496307	1		0.00651981	-1.14661	0.7423497015266812		0	-0.546891	1		0	-2.48979	1
Gm20686	0.0808308	2.6091156473452375	4.221171403152815e-12		0.018352145039969802	-0.0445683	1		0.00955362	-1.18565	0.00667755		0.010396663085728014	-0.978734	0.20127739607101977		0.00640724	-1.58152	0.195512		0.0382399	1.0996145228236704	1		0.050106064038245565	1.4978450157133025	1		0.00702133	-1.37716	0.4854711571826472		0.010428565036045442	0.13011622077149543	1		0	-2.81491	1
Gm47471	0.028070946191853834	3.1894016608569205	4.221171403152815e-12		0.00456324	-0.210054	1		0.00274529	-1.0661	0.15156037459943075		0.00222786	-1.29603	0.23269641303312982		0.000915319	-2.1947	0.23712470664586377		0.00899763	0.9976784266652361	1		0.00556734	0.5235184096027341	1		0.00100305	-1.84544	0.48816317773697804		0	0.9960988727998075	1		0	-0.946796	1
Tmigd3	0.6334564122571353	2.357957655394199	4.372596419029196e-12		0.17598219081571043	0.12619766161593793	1		0.0901555	-1.08047	0.00248251		0.1090164386417766	-0.708625	0.4207175044020567		0.0634622	-1.46199	0.0981373		0.3542817490111853	1.1439986883851347	0.9797692992332144		0.24310719959296923	0.5740847598220777	1		0.039620373279523405	-2.10725	0.0203108		0.16685704057672707	0.0850168	1		0.027122771888484255	-2.48736	1
Gm40155	0.10382868049276056	2.5384830114102757	4.372596419029196e-12		0.019244952095968333	-0.491554	0.7456041285770404		0.018668	-0.529527	0.48886223597145995		0.0121789	-1.1791	0.0383028		0.00732256	-1.80993	0.0667601		0.0517364	1.119983448246468	1		0.031548262542599056	0.4228736216806226	1		0.029589899031542796	0.2840885603751886	1		0	-1.27852	1		0	-3.22142	1
Gm47827	0.2090101776694659	2.4053369386802097	4.372596419029196e-12		0.0557508	0.0890613	1		0.0339318	-0.817714	0.0591735		0.0297048	-0.979511	0.0849811		0.013424685671581029	-2.06443	0.00813127		0.1293409559882105	1.3396938693463256	0.9797692992332144		0.053817624337374866	0.057365594597035496	1		0.022067043345557338	-1.29227	0.42177306582257623		0.020857130072090883	-0.788923	1		0.00271228	-3.31753	1
Atg16l2	1.9470414123675002	2.336274672965158	4.451872216298207e-12		0.5040391835031706	-0.0373509	1		0.33009413865740383	-0.801963	0.037249962256541605		0.3184349379400123	-0.809923	0.1695036807115497		0.1992345396259639	-1.45014	0.09171		1.0898381421963128	1.1268021718843464	1		0.4954932999337617	-0.049827	1		0.3019172748642163	-0.799223	0.871099		0.2294284307929997	-1.11556	1		0.0244105	-4.2611	1
4930512B01Rik	0.2827386869444555	2.3909602188952603	4.451872216298207e-12		0.072119	-0.0147859	1		0.0400813	-1.05948	0.00482394		0.0481217	-0.699422	0.49051873632431214		0.024103412910338667	-1.66882	0.0503288		0.20019730579044756	1.5328644851863213	0.9797692992332144		0.057529184636504166	-0.299518	1		0.0356082	-1.0532	0.6511310225585808		0.052142825180227205	-0.232927	1		0.010849108755393702	-2.43941	1
Adhfe1	0.6899365088118292	2.3509732652551163	4.799585790660815e-12		0.18173583628770096	0.011413827108160302	1		0.0891671	-1.24602	0.000265087		0.1324831924638484	-0.53279	0.8413121479724278		0.077497	-1.29683	0.20062243047648892		0.4442580662203752	1.3535275386889167	0.9797692992332144		0.22269361794775805	0.3153528413923712	1		0.0772347	-1.26575	0.38608992830958716		0.0938571	-0.810369	1		0.016273663133090553	-3.2685	1
Gm28379	0.31926473741096406	2.38547	5.5068876648093574e-12		0.0777734	-0.110907	1		0.058639477725566755	-0.620752	0.2388175206250583		0.0445571	-1.02556	0.0518819		0.0244085	-1.83451	0.020247087345310392		0.2238160890578599	1.5127148183273214	0.9797692992332144		0.0649523	-0.308526	1		0.0446356	-0.905838	0.7894800361378383		0.010428565036045442	-1.99905	1		0	-4.94243	1
Rsf1os1	0.8766252111962065	2.335397922279264	6.235808783560909e-12		0.21635690990364398	-0.132171	1		0.1482458706545227	-0.806685	0.037249962256541605		0.1445136168916194	-0.79707	0.1929542605428425		0.10770259186518416	-1.17466	0.302005		0.5488555349760584	1.298516801372364	0.9797692992332144		0.2356840789947106	0.0357003	1		0.13490987863533918	-0.808377	0.8697065738679287		0.020857130072090883	-2.90509	1		0.00813683	-4.43278	1
Prps1l1	0.051745238160887184	2.705977186597826	6.440886470509128e-12		0.014384113679976331	0.4670017968970175	0.7708076260511098		0.00647889	-1.01255	0.0501414		0.00386162	-1.73432	0.00208017		0.00213575	-2.35848	0.028730906504454267		0.019119967406952855	0.8295556678569094	1		0.011134680897387903	0.16357858626269728	1		0.00150457	-2.60033	0.0544551		0	-0.168646	1		0	-2.11154	1
Gm17029	0.0659498	2.626619394984542	6.918692019476345e-12		0.012896101919978779	-0.316182	0.9547689465097383		0.010322305067796394	-0.698661	0.28099671282355687		0.00772324	-1.11026	0.10526019585019414		0.00396638	-1.94043	0.0706406		0.0382399	1.421542617711033	0.9797692992332144		0.018557801495646505	0.42183426947324243	1		0.0100305	-0.564371	1		0.010428565036045442	0.4345953449026405	1		0	-2.51093	1
Gm17638	0.0490396	2.760519987911434	7.242670322828596e-12		0.00823367	-0.486216	0.8847532623952642		0.00571021	-1.09141	0.036352994514311975		0.00608947	-0.916318	0.43701097931607824		0.00274596	-1.9155	0.14583052793586182		0.030367007058101594	1.623001744423874	0.9797692992332144		0.027836702243469756	1.5039428712659726	1		0.00601828	-0.753295	1		0.010428565036045442	0.9465430483255757	1		0	-2.00009	1
2610204G07Rik	0.0967264	2.534749525887878	7.390168771182105e-12		0.019145751311968495	-0.373069	0.9457605653410784		0.015154	-0.772013	0.14218700072021845		0.015743518386959563	-0.656352	0.7449849425345363		0.00732256	-1.70757	0.10915889533894203		0.0449882	1.0171826710326801	1		0.011134680897387903	-0.85733	1		0.022067043345557338	-0.0516116	1		0.020857130072090883	0.4094137509296436	1		0	-3.12188	1
4930469K13Rik	0.9574560080619061	2.320923190317606	8.082359632259152e-12		0.25454921174358114	0.00116481	1		0.16932972781427702	-0.741383	0.0666382		0.15030604346795357	-0.887941	0.0904871		0.0790226	-1.77817	0.017705231340676485		0.5612272785923221	1.1871220994975367	0.9797692992332144		0.35074244826771894	0.4762528494381508	1		0.12086721468816633	-1.11242	0.521698		0.3024283860453178	0.283854	1		0.00542455	-4.98522	1
Gm35188	14.146742268181374	2.2962067808129385	9.32628148910186e-12		3.4551633067143146	-0.189186	0.9873670243337859		2.2489447637071294	-0.944985	0.00744068		2.8319025007939436	-0.50805	0.8126461004940608		2.1723582268558395	-0.868981	0.5203030126670334		10.494612698486888	1.528369463691184	0.9797692992332144		2.525716783557489	-0.599661	1		1.4724736196035533	-1.42026	0.13481735402914627		1.0845707637487259	-1.81419	1		0.0895051	-5.38461	1
Aspn	0.0399081	3.0385525256846977	9.32628148910186e-12		0.00575365	-0.547133	0.8847532623952642		0.00384341	-1.20234	0.051466		0.00267343	-1.66368	0.027802431787917085		0.000915319	-2.79275	0.044388170423960274		0.013496447581378487	0.9378373838726413	1		0.00556734	-0.0745239	1		0.016048758796768973	1.183357763993392	0.2849608109937529		0	0.4059746669628721	1		0	-1.53692	1
9130015G15Rik	1.2476351867680577	2.30854	9.386806381237402e-12		0.3710109321593895	0.21825904942077345	0.9642408007785861		0.188327	-1.02199	0.00324477		0.20926997553986817	-0.790112	0.19536702602519446		0.0982443	-1.85771	0.011139571920157097		0.6388318521852484	0.9723337714343973	1		0.5437435838224426	0.7212212045893285	1		0.13190073636094501	-1.3838	0.26638979857155537		0.1772856056127725	-0.846045	1		0.010849108755393702	-4.6385	1
1700047K16Rik	0.0399081	2.8785566414861172	1.1498970178227775e-11		0.00793606	-0.070297	1		0.0037336	-1.35619	0.011266897701174812		0.00386162	-1.21605	0.1658002976397349		0.00427149	-0.926931	0.7418883940362125		0.015745855511608235	1.0555593427457355	1		0.012990461046952553	0.8493936890067593	1		0.00200609	-1.78948	0.4317992884409275		0.010428565036045442	1.3160891634456773	1		0	-1.63164	1
Lrrc75aos1	0.0547891	2.713371846768948	1.2069135249786444e-11		0.011209688591981555	-0.155617	1		0.00658871	-1.07474	0.0366164		0.00742619	-0.813087	0.5935834312892105		0.00152553	-2.85891	0.00764241		0.024743487232527225	1.1196896801654512	1		0.016702021346081855	0.6096022836850405	1		0.0085259	-0.461429	1		0.010428565036045442	0.7571805543724812	1		0	-2.189	1
Gm19667	0.0686554	2.5748095253079164	1.4450549158704426e-11		0.015772924655974047	-0.0515241	1		0.010432116823836782	-0.790243	0.162296		0.00742619	-1.27185	0.0334866		0.00366128	-2.14347	0.032093		0.0483623	1.6781100870222563	0.9797692992332144		0.016702021346081855	0.18871883412865653	1		0.00702133	-1.15982	0.6938947446154142		0	-0.659499	1		0	-2.60239	1
Gm11457	0.22930242792863734	2.3478207092508727	1.5332022217807797e-11		0.056246844527907444	-0.132172	1		0.0362379	-0.910429	0.024051037291657328		0.0384677	-0.755927	0.37057858941002086		0.0207472	-1.60803	0.0702278		0.14396210753470387	1.3189469607347735	0.9797692992332144		0.0742312	0.3401325373916593	1		0.0486478	-0.309635	1		0.020857130072090883	-0.961929	1		0	-4.49112	1
Gm48350	0.0720375	2.56684	1.5567961778563385e-11		0.016070527007973557	-0.116355	1		0.010651740335917556	-0.843285	0.11245594962056903		0.0102481	-0.846932	0.4115737402164696		0.00579702	-1.58108	0.20738456182669357		0.030367007058101594	0.906271	1		0.016702021346081855	0.11321882933055338	1		0.00902743	-0.885325	0.9165478237655316		0	-0.733869	1		0.00542455	-1.08712	1
4930479D17Rik	0.30100171217770977	2.3565703920021885	1.6442386755961985e-11		0.0652741	-0.360014	0.9405503019178665		0.0365673	-1.34136	0.000167987		0.047082031402511146	-0.863935	0.20127739607101977		0.0353924	-1.21803	0.3228571919266294		0.1417126996044741	0.8880944067202532	1		0.0909332	0.2385771505576919	1		0.17202263335286744	1.2357575422324114	0.0336685		0.0312857	-0.932857	1		0	-4.87728	1
Gm49460	0.0328058	2.958743256977792	1.6442386755961985e-11		0.00654725	0.00446452	1		0.00340416	-1.12911	0.070378		0.00371309	-0.912452	0.6294722715737014		0.00122043	-2.22744	0.14576770335999464		0.00674822	0.25286078311935345	1		0.00742312	0.4907816231907338	1		0.00200609	-1.45528	0.6943847578950375		0	0.6404399205998956	1		0	-1.30246	1
Gm10563	0.3294108625405498	2.343393406470568	1.742986621604395e-11		0.0783686	-0.195797	0.9873670243337859		0.052380207631264684	-0.904357	0.023611354020261526		0.057033123213136534	-0.708901	0.4612902698557738		0.038443418059527494	-1.23962	0.27836469078591164		0.2193172731974004	1.4024968620204867	0.9797692992332144		0.0779428	-0.1237	1		0.0646966	-0.432331	1		0.0417143	-0.749682	1		0.00271228	-4.01589	1
Gm21057	1.054858809305929	2.289004676113959	1.742986621604395e-11		0.3006775763035052	0.11111374228342674	1		0.16065459908708643	-1.02272	0.00333168		0.17793146252431657	-0.79618	0.19137213325730051		0.0948881	-1.67394	0.0300098		0.5859707658248493	1.0818349240344993	1		0.5901380875615588	1.0773104737090375	1		0.12788854666175276	-1.19527	0.4480949995871577		0.33371408115345413	0.25941535802464366	1		0.029835	-3.14587	1
Gm11146	0.3676279338619894	2.324900831875853	1.8530489057567716e-11		0.10564883495982615	0.1634770331596762	0.9873670243337859		0.0549059	-1.02538	0.00594514		0.0610433	-0.79206	0.2738250805983547		0.0247136	-2.06755	0.00549228		0.2283149049183194	1.281989710079802	0.9797692992332144		0.0705196	-0.439422	1		0.061185892912681714	-0.693096	0.9866348787958681		0.0834285	-0.0712503	1		0	-5.18736	1
St6galnac5	0.0875949	2.5003280290959546	1.9600399542435012e-11		0.021725	0.0322576	1		0.012408728432563751	-0.969059	0.0352085		0.013218614494711333	-0.804182	0.43701097931607824		0.00640724	-1.77416	0.0871971		0.049487	1.2855649481920581	0.9804846534251275		0.031548262542599056	0.6469008251080153	1		0.00401219	-2.31623	0.047194028608472195		0.010428565036045442	-0.0571994	1		0.00271228	-2.00009	1
Runx2	0.43121031800739323	2.3197024743951498	1.9600399542435012e-11		0.0969192	-0.326008	0.9455071295329556		0.0867513	-0.515452	0.4120943608940982		0.059112455830282136	-1.10522	0.0230428		0.0323413	-1.91338	0.011976737169067034		0.2418113524996979	1.1221045007505803	0.9949994741823867		0.14103929136691343	0.3194516388250186	1		0.1469464477329159	0.3855660513271135	0.9580704182464571		0.010428565036045442	-2.47772	1		0.00542455	-3.8353	1
Gm16572	0.10450508883473295	2.467387537733577	2.0807706895401284e-11		0.022816180319962454	-0.247135	0.983066		0.014934398821492657	-0.981451	0.0263467		0.017822851004105168	-0.631745	0.7778615684462564		0.00915319	-1.54817	0.16799097816657432		0.0618587	1.3278435693265114	0.9797692992332144		0.0408272	0.7267298488857197	1		0.014544187659571882	-0.824908	0.9398420697811796		0.0312857	0.669524	1		0.00271228	-2.27646	1
4831440D22Rik	0.15151546860181347	2.396310943997014	2.5316744627873965e-11		0.0357123	-0.164644	1		0.023170280524521695	-0.925664	0.0313398		0.0248035	-0.75616	0.4439329970309525		0.015255324626796624	-1.40746	0.2144165189553541		0.11022098858125765	1.5841153220378534	0.9797692992332144		0.033404	-0.147482	1		0.0235716	-0.725955	0.9969397019026365		0.020857130072090883	-0.330991	1		0	-3.86091	1
4930455C13Rik	0.4007719426186361	2.3085328144830717	2.5875533014057452e-11		0.10247440987183137	-0.0879258	1		0.0745622	-0.66286	0.17331869000693934		0.0662416	-0.812566	0.23840283146480176		0.0393587	-1.52314	0.0844869		0.2328137207787789	1.1678762192723435	0.9797692992332144		0.12248148987126693	0.21466315472545938	1		0.0571737	-0.93364	0.758655		0.0312857	-1.37913	1		0	-5.32314	1
Gm20275	2.459082527240593	2.2637453352846366	2.639093834400646e-11		0.5745709409270545	-0.304015	0.9457605653410784		0.4920664788169749	-0.573657	0.24957072951702847		0.4180943798046337	-0.803669	0.17652539344669174		0.31609032626722605	-1.16096	0.22485154318804484		1.7275452904164463	1.4207006310273016	0.9797692992332144		0.4528103564937747	-0.572785	1		0.5015237123990304	-0.442011	1		0.2294284307929997	-1.50312	1		0.029835	-4.38528	1
Kmo	0.0639206	2.585834823509329	2.7539008979138188e-11		0.011804893295980575	-0.45639	0.8847532623952642		0.00900456	-0.90921	0.084253		0.00683209	-1.2807	0.039109714071222955		0.00427149	-1.81924	0.1186256818971167		0.0449882	1.686624271001878	0.9797692992332144		0.025980922093905106	0.8989849313812694	1		0.018054853646365096	0.3167713836474233	1		0.010428565036045442	0.45310864255396766	1		0.00271228	-1.48979	1
Trim43c	0.16064698121844062	2.3854641924035076	2.7539008979138188e-11		0.0421603	0.0373036	1		0.025476327401369826	-0.872937	0.0475232		0.0237638	-0.928809	0.1649737110607579		0.0109838	-1.97933	0.019055488533983048		0.1034727647905684	1.3893750332867296	0.9797692992332144		0.050106064038245565	0.3279200142709895	1		0.022067043345557338	-0.916824	0.8218281773867188		0.010428565036045442	-1.00874	1		0.00271228	-2.95164	1
Gm16984	0.0767723	2.4741244360123122	2.8038102979436443e-11		0.018252944255969964	-0.075522	1		0.013726469505048397	-0.590204	0.3928898418709437		0.0106937	-0.950453	0.20634048137406036		0.00671234	-1.53048	0.2018778138335538		0.026992895162756974	0.5766556391568285	1		0.022269361794775806	0.3430531848460099	1		0.0085259	-1.12278	0.6846273579712322		0.010428565036045442	0.11529750605995037	1		0.00271228	-1.8276	1
Oprm1	0.9314142868959694	2.28002	2.825201740674528e-11		0.22191215380763485	-0.251779	0.9567293115069778		0.1996377724814239	-0.436618	0.5219817232424822		0.1439195218581492	-0.945381	0.0592327		0.10861791134279196	-1.29314	0.20105897436607004		0.5432320151504841	1.149547558919708	0.9797692992332144		0.24681875989209853	-0.0249413	1		0.17352720449006453	-0.56361	1		0.020857130072090883	-3.03095	1		0	-6.55913	0.7682968839604833
Gm13572	0.0852275	2.4807364029523478	2.8344848057889353e-11		0.020931365423965557	-0.00547155	1		0.012189104920482977	-0.968122	0.0347544		0.0121789	-0.906155	0.2632107457471729		0.0048817	-2.12876	0.0223272		0.0596093	1.59485	0.9797692992332144		0.020413581645211155	0.0772863	1		0.010531997960379638	-0.974885	0.8260719206581988		0.010428565036045442	-0.0307964	1		0	-2.97559	1
1700011L22Rik	0.32670522917266026	2.309521458414612	2.8889454304799352e-11		0.1041608231998286	0.3673880706522503	0.8356775514066842		0.040959785003064415	-1.327	0.000133123		0.0567361	-0.730567	0.40091231561934676		0.0308158	-1.57975	0.0669578		0.14508681149981872	0.7659996277041508	1		0.11320258912344368	0.40142479065852665	1		0.039620373279523405	-1.16846	0.4958306895402516		0.0625714	-0.274855	1		0	-5.02786	1
Gm16185	0.067979	2.516087404948708	3.1694269573296586e-11		0.016467330143972902	0.000151522	1		0.011530234384240654	-0.647285	0.3277254963266614		0.0106937	-0.721781	0.6387867349123895		0.00244085	-2.70875	0.00390333		0.0258682	0.726058	1		0.00556734	-1.17267	1		0.0085259	-0.914335	0.8899171482062675		0	-0.683911	1		0	-2.62681	1
Gm31243	1.4350002974944074	2.2617266304540493	3.3752488556036367e-11		0.43985627625527624	0.23440007530463225	0.9567293115069778		0.0942185	-2.38651	3.4190159101235625e-14		0.3658140168592585	-0.123025	1		0.26422222253611755	-0.615649	0.77985		1.0268547201498799	1.4481208214469796	0.9797692992332144		0.36558868946423617	-0.0988854	1		0.0692103	-2.56145	0.00208155		0.2294284307929997	-0.726633	1		0.0189859	-4.19462	1
4930444A19Rik	2.28355	2.248430694672198	3.489665824510992e-11		0.6074064004310005	-0.0675513	1		0.38785512233464753	-0.871517	0.017662842632527504		0.42834251913199417	-0.654487	0.45451572113719774		0.29717372372999823	-1.15349	0.22972596397053252		1.6341948613119117	1.4377939980655796	0.9797692992332144		0.6569461729458863	0.0664609	1		0.2753365181070677	-1.23531	0.39352084687715316		0.23985699582904516	-1.34547	1		0.010849108755393702	-5.55261	1
Gm17216	0.0571565	2.602956854466462	3.917262517865017e-11		0.010217680751983187	-0.500974	0.8198536321111584		0.00911438	-0.683554	0.3285911624632644		0.00712914	-1.02502	0.2199736950997915		0.00549192	-1.28906	0.46712714030880165		0.0483623	1.9848413452912599	0.9797692992332144		0.0092789	-0.273665	1		0.00601828	-1.08292	0.7880576896322489		0	-0.377632	1		0	-2.32053	1
Gm11655	0.1461042018660344	2.351543702966994	3.9795082846415966e-11		0.0456324	0.36620567360534206	0.8570198229825461		0.016142328137936916	-1.4953	3.792916890589871e-05		0.026882800264525292	-0.599207	0.7778615684462564		0.014645111641724759	-1.44476	0.17647648564423643		0.0776046	1.0752178685162037	1		0.0445387	0.2768694322426466	1		0.00802438	-2.23406	0.028442253133644152		0.0312857	0.10689751120354796	1		0	-3.83914	1
Gm48250	0.1278411766327801	2.380753819166223	4.0605927702262204e-11		0.029363432063951683	-0.228396	0.9873670243337859		0.018777810282906208	-1.00513	0.015877846593000792		0.025249038922482318	-0.457509	0.9936495120048627		0.010373620746221704	-1.72714	0.0660103		0.091101	1.5433957594183125	0.9797692992332144		0.0556734	0.8110202048691217	1		0.014544187659571882	-1.18358	0.5654316852802302		0.020857130072090883	-0.0965257	1		0	-3.62681	1
Atxn7l1os1	0.18465947735846017	2.315712587681274	4.5523511222766957e-11		0.048310781807920505	-0.0355395	1		0.0353594	-0.605055	0.2859517893136962		0.0277739	-0.956589	0.10698948232001511		0.014950218134260692	-1.78836	0.032041460962542484		0.0955998	1.006944079721873	1		0.0482503	0.0217912	1		0.032599	-0.602227	1		0.052142825180227205	0.33068653965863515	1		0.00542455	-2.61465	1
Gm26648	0.051745238160887184	2.621088289011313	4.739290776524717e-11		0.011110487807981717	-0.14161	1		0.00823588	-0.671515	0.3595652976256901		0.00594095	-1.13902	0.12874009811985837		0.00274596	-2.085	0.0702278		0.024743487232527225	1.1440542285646513	1		0.011134680897387903	0.10848091032388929	1		0.00702133	-0.710756	1		0	-0.222966	1		0.00271228	-1.16253	1
4921511I17Rik	0.0848892	2.477871114066985	4.894565741905272e-11		0.018947349743968823	-0.195056	1		0.013836281261088785	-0.748438	0.1867741266220812		0.013367138253078874	-0.751931	0.5636979747498951		0.00884809	-1.27991	0.39822490834884694		0.0438635	1.137574917253632	1		0.020413581645211155	0.0811489	1		0.00952895	-1.11239	0.6997429401962633		0	-1.02889	1		0	-2.97179	1
Gm32036	2.8825141493153037	2.2239817685509915	5.907448655472027e-11		0.8224737001426466	0.048919233743802026	1		0.422885	-1.13854	0.000662266		0.608799	-0.476745	0.8811800627029494		0.4237929181324102	-0.987533	0.3984097374401795		1.8591356543348867	1.2597272371339545	0.9797692992332144		0.7293215987789077	-0.139377	1		0.34504831413053294	-1.26414	0.3636294763509143		0.3858569063336813	-1.03535	1		0.0189859	-5.22767	1
Gm13293	0.11600403064826344	2.351428806694812	6.020488380246679e-11		0.038589104975936504	0.5043648429339527	0.5295527945548437		0.0143853	-1.30711	0.000617934		0.017674327245737625	-0.904983	0.19536702602519446		0.00366128	-3.06204	0.000110548		0.0753552	1.38252	0.9797692992332144		0.050106064038245565	0.7831780886558706	1		0.00401219	-2.8257	0.00443764		0	-1.56409	1		0	-3.50699	1
Angptl1	0.11363660145136009	2.3783523615409403	6.422023215529121e-11		0.034720274399942866	0.3462615499524846	0.9223398317733514		0.013506845992967623	-1.35487	0.000464229		0.018119898520840252	-0.810649	0.36134522550868753		0.00854298	-1.83365	0.0479828		0.0742305	1.4110233312160818	0.9797692992332144		0.025980922093905106	-0.0859369	1		0.0100305	-1.53828	0.28723818742840146		0	-1.51595	1		0.00271228	-2.45749	1
Gm15563	0.8678319027505655	2.235095345270908	7.275653011270225e-11		0.22478897654363011	-0.132422	1		0.1653765045968231	-0.683705	0.11222991022944921		0.16337613420429736	-0.658708	0.45828218955589023		0.1070923788801123	-1.2409	0.23745622840510575		0.5747237261737006	1.310194614700774	0.9797692992332144		0.17815489435820644	-0.42578	1		0.13089768893614695	-0.910277	0.7615957923473403		0.0625714	-1.73737	1		0.00271228	-5.48846	1
Usp50	2.7225435764388357	2.215660671629031	7.28222786385299e-11		0.6807157798068799	-0.219411	0.9763242113373077		0.5211665941676775	-0.692722	0.0976287		0.5181993929443577	-0.656849	0.44777730324248183		0.3960282273116404	-1.00979	0.3779018267757139		1.8062745679744876	1.296769344250434	0.9797692992332144		0.7924181238641058	0.0594258	1		0.46039876798230994	-0.757712	0.7809173530758887		0.23985699582904516	-1.62246	1		0.048821	-3.90265	1
Gm11716	0.041937317202287654	2.714659429697627	7.292232631177815e-11		0.00704326	-0.520717	0.8533109916390831		0.00647889	-0.647677	0.44940739903073706		0.00475276	-1.08645	0.25144359621490775		0.00183064	-2.24234	0.0786044		0.023618783267412354	1.459137726649515	0.9797692992332144		0.020413581645211155	1.2754525943768549	1		0.00601828	-0.550696	1		0	0.13865290272598063	1		0	-1.80424	1
Gm16982	0.0476868	2.6966939457634904	7.619956170342173e-11		0.00863047	-0.39993	0.9457605653410784		0.00538078	-1.18838	0.023303769347968812		0.00683209	-0.732985	0.7874838945265892		0.00305106	-1.77416	0.2224536502546234		0.029242303092986723	1.566521262023115	0.9797692992332144		0.024125141944340456	1.3035413496891417	1		0.00551676	-0.872624	0.9895048506089229		0.020857130072090883	1.5352576839078385	1		0	-2.00009	1
Lrrc4	1.7583234849572058	2.217086504124013	7.948670929304203e-11		0.4396578746872765	-0.217934	0.9772648117076271		0.3401968202131195	-0.672807	0.11804022885858897		0.32095984183226056	-0.724473	0.2994605677775189		0.22120220708855104	-1.22707	0.23745622840510575		1.0988357739172319	1.2068552284975198	0.9949994741823867		0.5548782647198305	0.18040835584419346	1		0.3921915430960418	-0.34101	1		0.2502855608650906	-0.931125	1		0.029835	-3.93397	1
Gm16725	0.0355114	2.86278	8.465036172416477e-11		0.00575365	-0.466962	0.9457605653410784		0.00439247	-0.910965	0.2016736126358186		0.00341605	-1.22986	0.19660205195428596		0.00213575	-1.70691	0.3846488822865592		0.0168706	1.3204932814950112	1		0.0092789	0.585262	1		0.00702133	0.011365863858166847	1		0	0.4691684934500664	1		0	-1.47373	1
Gm12000	0.043290133886232415	2.643062979268575	8.465036172416477e-11		0.00803526	-0.396749	0.9457605653410784		0.00691814	-0.64508	0.42804034719146977		0.00430719	-1.33761	0.0505728		0.00366128	-1.41736	0.4398180888155137		0.023618783267412354	1.3620390385444336	1		0.020413581645211155	1.181237252759204	1		0.00501524	-0.894492	0.9730753021546396		0.010428565036045442	1.051441906643583	1		0.00542455	-0.302455	1
Gm38604	0.5133939315570376	2.2548293939097017	8.576859493171871e-11		0.1367978811357749	-0.057827	1		0.0916928	-0.779136	0.0654304		0.0949067	-0.672273	0.5227639182719327		0.0491221	-1.60272	0.0561993		0.33516178160423243	1.3046936275193155	0.9797692992332144		0.1466066318156074	0.0737225	1		0.0807453	-0.830553	0.8623795480295442		0.0625714	-0.965726	1		0.00271228	-4.7174	1
Gm37571	0.0723757	2.4406147262958204	1.0267684333424706e-10		0.019145751311968495	0.10657192632689494	1		0.011859669652361815	-0.768105	0.16011330345656027		0.00980257	-1.01911	0.14583465598532944		0.00427149	-2.10079	0.028177003532041806		0.0371152	1.1055474785774129	1		0.014846241196517205	-0.132931	1		0.0100305	-0.829672	0.9430735665213648		0	-0.824492	1		0	-2.76739	1
Gm20089	0.11329839728037391	2.348425181979742	1.0267684333424706e-10		0.0356131	0.376713	0.8544374097819848		0.014714775309411881	-1.23379	0.00165693		0.0170802	-0.924083	0.18922712527910598		0.00762766	-2.01199	0.020280434989590222		0.0427388	0.5734740226648816	1		0.0686639	1.2703374736438078	1		0.0125381	-1.23982	0.5121514313553343		0.0417143	0.7951396410747114	1		0	-3.47507	1
Gm35549	0.046334	2.6554712830369773	1.0267684333424706e-10		0.00922567	-0.255697	0.9873670243337859		0.00592983	-1.01182	0.0694243		0.00653505	-0.787209	0.6800738144615897		0.00427149	-1.29568	0.505657		0.024743487232527225	1.335195715916659	1		0.011134680897387903	0.2919843182667421	1		0.00451371	-1.12794	0.80437		0.020857130072090883	1.5503645762980476	1		0	-1.98507	1
B230217J21Rik	0.059523934093569576	2.684403774649475	1.0683386026547666e-10		0.012499298783979432	-0.130491	1		0.00878494	-0.753988	0.2948123377849189		0.00816881	-0.815661	0.6418024094781511		0.00305106	-2.10832	0.0935707		0.0281176	1.161576230916606	1		0.0092789	-0.279701	1		0.00300914	-2.00035	0.24742973440055582		0	-0.383606	1		0	-2.3265	1
Spata46	0.036187846295522415	2.73068	1.1453070412128703e-10		0.00823367	0.070457	1		0.00263548	-1.84162	0.000231893		0.00445571	-0.940794	0.4892233605010215		0.00305106	-1.34369	0.5297719700332572		0.021369375337182604	1.5485993540258525	0.9797692992332144		0.018557801495646505	1.3745285546948853	1		0.00200609	-1.73973	0.42861461187941696		0.010428565036045442	1.3653326824655272	1		0	-1.58256	1
Hyal5	0.1498244477468825	2.409178076836485	1.150338606627531e-10		0.041267526143932094	0.15865056894196083	0.9945413848992133		0.021852539452037047	-0.995118	0.0247347		0.020793326171456027	-1.01243	0.12830020333038744		0.012814472686509164	-1.63644	0.1252522123178217		0.091101	1.320076096555705	0.9797692992332144		0.0445387	0.2800624140865038	1		0.0125381	-1.60835	0.28547050109398414		0.0312857	0.11004178060845504	1		0.010849108755393702	-1.50988	1
Gm36975	0.2790184410636074	2.2734706737033674	1.1603437661860514e-10		0.0783686	0.065878	1		0.0404107	-1.1176	0.00300521		0.057181646971504074	-0.484784	0.9760962066115878		0.030205542761057316	-1.39983	0.18021799242697095		0.1810773383834947	1.312980142116003	0.9797692992332144		0.0556734	-0.408532	1		0.038115802142326315	-1.01726	0.6990283061733146		0.010428565036045442	-1.88207	1		0	-4.82549	1
Angptl2	0.3091186122813784	2.244397101381952	1.2561534781325548e-10		0.0847175	-0.0119233	1		0.046120937536962614	-1.0919	0.00291666		0.0652019	-0.46041	0.9936495120048627		0.0427149	-1.05811	0.4485941398408944		0.19007497010441368	1.208555344035132	0.9797692992332144		0.1317603906190902	0.6569544897719388	1		0.029088375319143763	-1.58262	0.17690733241726403		0.052142825180227205	-0.463333	1		0.00813683	-2.99213	1
Chmp4c	0.0744049	2.4259972737084348	1.353152293378928e-10		0.020732963855965885	0.1993023473206792	0.9873670243337859		0.0113106	-0.907614	0.0610197		0.009357	-1.14731	0.0641383		0.00640724	-1.58371	0.18629737518236708		0.0348658	0.9614121881901827	1		0.011134680897387903	-0.550032	1		0.0125381	-0.561751	1		0	-0.874133	1		0.00271228	-1.81491	1
Ogn	0.0321294	2.9086759292041453	1.4103331988128336e-10		0.00416643	-0.823805	0.47239976795937344		0.0037336	-0.978769	0.174252		0.00237638	-1.58514	0.0529871		0.000305106	-3.56775	0.013904612695517328		0.00899763	0.6279218066872589	1		0.00371156	-0.258462	1		0.019057901071163157	1.734705984109337	0.015606283750351588		0	0.6404399205998956	1		0.00271228	-0.296381	1
Gm42962	0.7014354506253596	2.2032723679957487	1.5830360747145315e-10		0.18342224961569817	-0.144268	1		0.15121078806761315	-0.493347	0.4050565411087358		0.11302658011770027	-0.937758	0.0816062		0.060106	-1.80558	0.0165559		0.4476321781157198	1.230345277474637	0.9797692992332144		0.20042425615298226	0.0330273	1		0.16801044365367518	-0.241379	1		0.0938571	-0.937433	1		0.013561385944242128	-3.61811	1
Gm47431	0.29897248715179264	2.2465949677119728	1.5830360747145315e-10		0.0850151	0.0643969	1		0.037116373541650864	-1.39243	7.294228539530444e-05		0.0763412	-0.131849	1		0.0564447	-0.583307	0.8328470727272728		0.1552091471858526	0.9548223788298311	1		0.0630965	-0.351135	1		0.00902743	-3.18639	0.000338828		0.010428565036045442	-2.0005	1		0	-4.94388	1
1700054A03Rik	0.10754892637360866	2.366369151389523	1.5928219156995696e-10		0.023808188159960823	-0.311185	0.9457605653410784		0.018118939746663884	-0.783395	0.11986749927725951		0.0184169	-0.703561	0.6037882351988594		0.012509366193973233	-1.20704	0.42213613461222405		0.0641081	1.265135447406951	0.9797692992332144		0.042682943439986964	0.6772744741515346	1		0.016550282509168002	-0.751592	0.9959496394423828		0.073	1.5651517932956587	1		0.00271228	-2.38635	1
Gm15601	0.025027108652978115	2.9310437422325997	1.6671285536591488e-10		0.00277762	-1.06278	0.18591298569699463		0.0037336	-0.535162	0.7222995683580353		0.00222786	-1.27906	0.2293351197749005		0.000610213	-2.60184	0.0981373		0.011247	1.31997	1		0.011134680897387903	1.370839738977982	1		0.00702133	0.5906596144926306	1		0	1.0116957278508263	1		0	-0.9312	1
Gm48683	0.050730625647928615	2.5520645031441447	1.6897441676298651e-10		0.011904094079980412	-0.0293796	1		0.00790645	-0.761502	0.23604750736106264		0.00683209	-0.938303	0.34318300285380904		0.00274596	-2.10191	0.067055		0.023618783267412354	1.0590149013819543	1		0.012990461046952553	0.2876741887976779	1		0.00601828	-0.94111	0.9157996788658088		0	-0.239529	1		0	-2.18242	1
Gm17089	0.14779522272096537	2.2868282709117795	1.705477842575863e-10		0.0356131	-0.222992	0.9873670243337859		0.028990303594662214	-0.586677	0.3337288362023526		0.023615277580439346	-0.880435	0.21219220664596122		0.010678727238757638	-1.96646	0.018671553853796662		0.0742305	0.9443601433477089	1		0.0742312	0.944529	1		0.0361097	-0.135922	1		0.0625714	0.8557775844023934	1		0.00542455	-2.31353	1
Lrrn3	0.0936826	2.38821	1.903851034931029e-10		0.025494601487958048	0.1137724893204144	1		0.0136167	-1.01481	0.022592980832700248		0.014852375836754306	-0.810558	0.42639988254082606		0.00701745	-1.82196	0.0710084		0.0461129	0.9988367527337942	1		0.020413581645211155	-0.124012	1		0.017553329933966064	-0.444274	1		0.010428565036045442	-0.229614	1		0.00271228	-2.17251	1
Gm29361	0.13494346422349013	2.2835199037470684	1.9355840649949115e-10		0.0395811	0.16457521775302997	0.9873670243337859		0.022291786476198595	-0.886029	0.0398589		0.019011041071045513	-1.0837	0.049238507917181845		0.011288940223829503	-1.75413	0.050512793482520295		0.079854	1.1891661078019635	0.993946		0.020413581645211155	-0.727863	1		0.0336021	-0.108243	1		0.020857130072090883	-0.241724	1		0	-3.77177	1
Gm15492	0.13731089342039346	2.2898323919688317	1.978258522128366e-10		0.0350179	-0.110269	1		0.0238292	-0.796725	0.0848809		0.0222786	-0.852882	0.25291613140961916		0.0186115	-1.04222	0.5129327024292061		0.0776046	1.1244308429948808	1		0.046394503739116265	0.3821059614097839	1		0.0255777	-0.535075	1		0.0312857	0.15371473272325442	1		0.00271228	-2.79134	1
6530409C15Rik	0.5830639907801929	2.1973893090454824	1.9856227598824228e-10		0.1527692073597486	-0.146043	1		0.1164004614028104	-0.63442	0.17161088938381153		0.10411515461564769	-0.77545	0.2793239041152408		0.0729205	-1.24683	0.23943792259820507		0.4138910591622736	1.3893164719961044	0.9797692992332144		0.10949102882431438	-0.573527	1		0.11484893013937797	-0.538602	1		0.073	-0.997098	1		0.00813683	-3.94097	1
4930579G18Rik	0.14914803940491012	2.261658707284701	2.0191109035462065e-10		0.0391843	-0.0788058	1		0.026135197937612147	-0.803887	0.0734296		0.025546086439217405	-0.78785	0.34318300285380904		0.014950218134260692	-1.50987	0.12779768841153155		0.0697316	0.819287	1		0.0872217	1.1474345446684655	1		0.032599	-0.320853	1		0.020857130072090883	-0.40138	1		0	-3.9312	1
Gm15527	0.18093923147761207	2.245893207542048	2.273387079982432e-10		0.0525764	0.10773177623038688	1		0.027123503741975634	-1.08134	0.0047662		0.0305959	-0.822226	0.2671730464856077		0.019221709029763747	-1.44056	0.15993726371045366		0.11584450840683201	1.2760061197672141	0.9797692992332144		0.0723754	0.5797866292494791	1		0.0356082	-0.491803	1		0.0312857	-0.275314	1		0.00271228	-3.21981	1
Pkd1l3	0.084551	2.4025602684079965	2.342665757885925e-10		0.018947349743968823	-0.254969	0.986208		0.017789504478542724	-0.360694	0.7636256610071896		0.009357	-1.36602	0.011821985019753825		0.00701745	-1.6601	0.13938606505423629		0.0472376	1.2003210567452678	1		0.0296925	0.5473651515571012	1		0.014544187659571882	-0.554538	1		0.0312857	0.9316313389216475	1		0.00271228	-2.01497	1
Gm11465	0.0388935	2.6000987739878036	2.4536352070574495e-10		0.00892807	-0.0284321	1		0.00592983	-0.757555	0.2793844758564349		0.00534686	-0.863486	0.5359175067804971		0.00122043	-2.70137	0.0182176		0.012371743616263612	0.5755664016261219	1		0.012990461046952553	0.7083013697721592	1		0.00551676	-0.63476	1		0	0.173314	1		0	-1.76958	1
Gm19710	1.0010843461191248	2.157861254741406	3.700287032228081e-10		0.2444307317755978	-0.318908	0.9455071295329556		0.2079834659404933	-0.598853	0.2137912326653835		0.20689359540598748	-0.567113	0.6820555116374925		0.15102771380528657	-0.996125	0.4776796316099079		0.7018152742316813	1.3388294678127435	0.9797692992332144		0.2022800363025469	-0.505992	1		0.21515367261918406	-0.439563	1		0.1251427804325453	-1.10443	1		0.00271228	-5.7493	1
Gm13269	0.6750555252884368	2.16354	4.133046711905417e-10		0.20088158759966945	0.073807	1		0.1104706265766295	-1.00474	0.00442666		0.14718704454223516	-0.472567	0.9085667526882475		0.094583	-1.10214	0.38119938073221077		0.4318863226041116	1.2043884292066542	0.9797692992332144		0.191145	-0.00832517	1		0.0782377	-1.34904	0.3108814430592033		0.0938571	-0.910378	1		0.00271228	-5.17686	1
Gm50217	0.0368643	2.621088289011313	4.144201715820064e-10		0.00803526	-0.110698	1		0.0056004	-0.746414	0.32487344113512073		0.00371309	-1.32749	0.076461		0.00305106	-1.44357	0.44135100392413595		0.019119967406952855	1.283587298751617	1		0.0092789	0.37625323516434683	1		0.00501524	-0.67141	1		0	0.26379465600346474	1		0	-1.6791	1
Gm26788	0.0916533	2.351879086049556	4.2039457320038017e-10		0.023411385023961475	-0.0481129	1		0.015812892869815753	-0.753569	0.16662512996739237		0.014406804561651677	-0.852187	0.34445560527079616		0.00549192	-2.1607	0.018671553853796662		0.0528611	1.2089692574050313	1		0.020413581645211155	-0.117286	1		0.019559424783562186	-0.278399	1		0.0312857	0.7803701817443702	1		0	-3.16753	1
Gm32250	0.16369081875731634	2.228006164346632	4.2039457320038017e-10		0.0394819	-0.275886	0.9567293115069778		0.0295394	-0.781927	0.0847767		0.0319326	-0.602065	0.7533940425646488		0.026239158358090195	-0.839687	0.6490073444456081		0.0944751	1.1073982742653539	1		0.033404	-0.37819	1		0.043131	-0.0675229	1		0.010428565036045442	-1.1451	1		0	-4.08888	1
Cr2	0.10146125129585723	2.3184607500828873	4.2039457320038017e-10		0.026784211679955927	-0.0146903	1		0.015263834089613817	-1.0137	0.0196642		0.017377279729002538	-0.740373	0.531081		0.0195268	-0.487943	0.9305479455231409		0.0629834	1.2924558190650286	0.9797692992332144		0.014846241196517205	-0.708229	1		0.00952895	-1.48578	0.3506047179817298		0.010428565036045442	-0.39252	1		0	-3.3369	1
Gm4651	0.0263799	2.9418754624941066	4.5943156552494203e-10		0.00476164	-0.200559	1		0.00252567	-1.26006	0.0634287		0.00297048	-0.920493	0.7209853581118025		0.000610213	-2.67147	0.11024622496241995		0.00899763	0.9420303971153219	1		0.012990461046952553	1.500059436778745	1		0.00300914	-0.64638	1		0	0.9428006466397587	1		0	-1.00009	1
Gm50020	0.0899623	2.322693575684127	4.673728969080611e-10		0.0156737	-0.783956	0.16876372772799259		0.019326869063108144	-0.392187	0.7245268019080936		0.016337613420429737	-0.640273	0.7573654334751574		0.0161706	-0.585894	0.8625504326932032		0.0359905	0.649176	1		0.031548262542599056	0.48462939620913836	1		0.0235716	0.00569711	1		0	-1.21796	1		0.00813683	-1.15583	1
9530036M11Rik	0.0355114	2.5967953757093687	4.949076754179063e-10		0.00704326	-0.310925	0.971711		0.0056004	-0.700971	0.3716145193669349		0.00445571	-1.00614	0.32915234093677814		0.00305106	-1.40445	0.4610371247443453		0.013496447581378487	0.8290008918297342	1		0.00742312	0.14682722197337306	1		0.0085259	0.11333783695944444	1		0	0.3016380071481368	1		0	-1.64126	1
Gm43154	0.0213069	3.179804017084275	5.392109835110266e-10		0.00436483	0.2417833314818063	1		0.000658871	-2.71573	0.000112974		0.00207933	-0.971292	0.827842		0.000915319	-1.79794	0.5224980330117613		0.010122335686033865	1.5701325155754935	1		0.00185578	-0.100333	1		0.000501524	-2.04639	0.604238		0	1.3855105644031571	1		0	-0.557385	1
Gm10847	0.10179945546684342	2.25438	5.702784347399733e-10		0.0272802	-0.0464717	1		0.0171306	-0.877408	0.049039890551540996		0.019308088587780596	-0.624479	0.7376198345442555		0.0122043	-1.2418	0.3545163594261803		0.0686069	1.3689399176779373	0.9797692992332144		0.024125141944340456	-0.113429	1		0.016048758796768973	-0.794661	0.9378		0	-1.44345	1		0	-3.38635	1
Gm41764	0.8685083110925379	2.1379296140375694	6.032463008204708e-10		0.2522675937115849	-0.000636923	1		0.14264547109646294	-1.02022	0.00346567		0.18268422279207797	-0.554165	0.7115926500330368		0.1418745190292086	-0.890297	0.5796358967257107		0.5499802389411733	1.1686624326352677	0.9797692992332144		0.2932132636312148	0.22620347141080344	1		0.16399825395448295	-0.647649	1		0.1251427804325453	-0.913573	1		0.013561385944242128	-3.97306	1
Gm50152	0.14576599769504822	2.2174923285206347	6.194430506665147e-10		0.0448388	0.19648547323787913	0.986208		0.0255861	-0.837892	0.0575731		0.025249038922482318	-0.804626	0.31632986236009136		0.015255324626796624	-1.47825	0.14583052793586182		0.0832281	1.08522	1		0.038971383140857664	-0.00219201	1		0.018054853646365096	-1.18322	0.5294605372104266		0.020857130072090883	-0.399416	1		0	-3.92924	1
Col10a1	0.022997883627060973	2.948253032264823	6.609625941876686e-10		0.00466244	0.0307393	1		0.00241586	-1.10189	0.1438871253774952		0.00148524	-1.72253	0.056684208284519685		0.000610213	-2.46908	0.1864193902778725		0.015745855511608235	1.9435909111029384	0.9797692992332144		0.00185578	-0.344486	1		0.00150457	-1.27316	0.8543328471654593		0	1.1429402611290786	1		0	-0.799955	1
Tmcc3os	0.11904786818713915	2.251880847036808	6.752329796291293e-10		0.032141054015947114	-0.0342154	1		0.023280092280562083	-0.62127	0.2947964236973488		0.021090373688191114	-0.739291	0.49051873632431214		0.011594046716365434	-1.55221	0.13049989894801217		0.0618587	0.9738506661666952	1		0.0371156	0.25038341379996965	1		0.018054853646365096	-0.858519	0.8857070314812039		0.010428565036045442	-0.669313	1		0	-3.61343	1
4833422C13Rik	0.0710229	2.384504991553376	7.057059832209315e-10		0.018649747391969312	0.0381393	1		0.012408728432563751	-0.703399	0.254199		0.00950552	-1.07982	0.11716470897829621		0.00335617	-2.44056	0.011139571920157097		0.041614046709250334	1.263701990083458	0.9957910710657404		0.0445387	1.3656618238966312	1		0.00702133	-1.3398	0.5194595268130247		0	-0.83543	1		0	-2.77832	1
Plxna4os2	0.045995767254121946	2.4574955363927176	7.357658378994226e-10		0.0161697	0.7449121603855069	0.17851702833084424		0.00296492	-2.22818	3.707856553540326e-07		0.0056439	-1.1512	0.11362255029796287		0.00152553	-2.77352	0.00764241		0.019119967406952855	0.836787	1		0.027836702243469756	1.3953620581120516	1		0.00601828	-0.861036	0.9679401542449724		0.010428565036045442	0.8417707264085141	1		0	-2.10461	1
Cxcr6	0.0733903	2.359985386819995	8.122752573753867e-10		0.0159713	-0.348078	0.9457605653410784		0.0105419	-1.05488	0.020773758868761323		0.00831733	-1.35818	0.015282365747547183		0.00396638	-2.27892	0.0165559		0.0461129	1.3492905458024458	0.9797692992332144		0.033404	0.8905409801485034	1		0.044134086691114675	1.3304886466631327	0.0401438		0.010428565036045442	0.10271578351958066	1		0	-2.84227	1
Gm48383	0.1433985684981449	2.246237003091234	9.02359910063107e-10		0.0364067	-0.160285	1		0.0283314	-0.608643	0.3146535802731191		0.0227241	-0.925413	0.17762037902278288		0.017086	-1.26607	0.33706501392249644		0.0899763	1.2488741644636292	0.9797692992332144		0.0371156	-0.0258452	1		0.033100565018336005	-0.250142	1		0	-1.9425	1		0.00271228	-2.88438	1
Gm46411	0.569198	2.1284586537835666	9.02359910063107e-10		0.16239168340773277	-0.045766	1		0.1181574494994566	-0.6258	0.18173661279705985		0.10990758119198187	-0.703229	0.4289535012166388		0.08604	-1.01337	0.46712714030880165		0.3880228679646315	1.2751016703763527	0.9797692992332144		0.16516443331125388	0.00408314	1		0.0621889	-1.45946	0.2252393245650872		0.11471421539649986	-0.42571	1		0.00813683	-3.9555	1
Gm3970	0.0219833	3.036125788290157	9.990409593448002e-10		0.00416643	-0.0292741	1		0.00120793	-2.02059	0.00220179		0.00267343	-0.728287	0.9936495120048627		0.00152553	-1.32286	0.6628456012624493		0.00224941	-0.368938	1		0.011134680897387903	1.6274046494822185	1		0.00200609	-0.823317	1		0.010428565036045442	2.2684711432129374	1		0	-0.683762	1
Slc24a1	0.11600403064826344	2.221599210830298	1.0074269556812733e-09		0.032240254799946945	-0.00602059	1		0.0217427	-0.720843	0.15551397414063078		0.023021182546969172	-0.577199	0.8338077693008666		0.00854298	-1.97584	0.020247087345310392		0.0562352	0.8492077253176271	1		0.042682943439986964	0.4630488656236258	1		0.0225686	-0.51642	1		0	-1.65457	1		0	-3.59746	1
Gm13703	0.19243817329114254	2.168761057073966	1.0243228404430748e-09		0.053469222575912016	-0.0583902	1		0.034700514908762345	-0.833784	0.051946809487402136		0.039061748450663826	-0.585332	0.7778615684462564		0.0332566	-0.772625	0.6799652569305936		0.14058799563935925	1.418129422130444	0.9797692992332144		0.042682943439986964	-0.315398	1		0.019057901071163157	-1.54996	0.21585871665443307		0.0312857	-0.418939	1		0.00271228	-3.36329	1
Gm50163	0.15185367277279965	2.190148880887033	1.062236184995601e-09		0.0382915	-0.226522	0.9873670243337859		0.029319738862783377	-0.69709	0.1667935748253657		0.032675226840859474	-0.469658	0.9936495120048627		0.017696176567084086	-1.34133	0.23745622840510575		0.0978492	1.2462335255170083	0.9797692992332144		0.0352598	-0.220996	1		0.031094470168739886	-0.470657	1		0.020857130072090883	-0.477832	1		0.00271228	-3.00662	1
Gm28501	1.033890150704785	2.108488494393335	1.0738660564301341e-09		0.2792502069595405	-0.172755	0.9873670243337859		0.21336424198647228	-0.653878	0.1392572514366373		0.21922106735049354	-0.565413	0.6823972933274981		0.16750346440222694	-0.92555	0.5448086181969843		0.6928176425107624	1.2320679560263452	0.9797692992332144		0.3043479445286027	0.00346106	1		0.1780409179016558	-0.807503	0.8647263692949112		0.0938571	-1.5654	1		0.010849108755393702	-4.50896	1
Lrrc18	0.13866371010433823	2.1936	1.0738660564301341e-09		0.0416643	0.12376378690272372	1		0.024597833353046727	-0.839803	0.0566526		0.0253976	-0.732688	0.46598277616084666		0.013119579179045097	-1.64164	0.0786336		0.0832281	1.1432120247807287	1		0.0649523	0.7786906976635577	1		0.018054853646365096	-1.12679	0.5961482040981031		0.010428565036045442	-0.930309	1		0	-3.87422	1
Gm13684	0.9222827742793422	2.114623934790587	1.074779999955246e-09		0.27111574267155386	7.789334873975484e-05	1		0.16032516381896528	-0.94404	0.0085898		0.20080412131291822	-0.516012	0.8122508986150132		0.1315008982829869	-1.11363	0.3652077452400526		0.6208365887434104	1.2439150250759519	0.9797692992332144		0.28207858273382685	0.064635	1		0.1780409179016558	-0.632312	1		0.0834285	-1.54822	1		0.00542455	-5.07697	1
4930506C21Rik	0.16301441041534395	2.190010778468202	1.1723616780078634e-09		0.0465252	0.0159496	1		0.031955221007752665	-0.671018	0.200186		0.0261402	-0.951674	0.12218957915458863		0.0219677	-1.12762	0.42849468650070827		0.0967245	1.1207215089735842	1		0.0686639	0.6173748728048438	1		0.0240731	-0.952126	0.7754066062740311		0.0312857	-0.164315	1		0.00271228	-3.10894	1
Gm16337	2.655917354754556	2.0927200931303185	1.231872456004405e-09		0.8044191574546763	0.0380942	1		0.5050242660297406	-0.80991	0.033656762084657094		0.5741928498489215	-0.546557	0.7209853581118025		0.3612460871625441	-1.2031	0.1894735460818486		1.6971782833583446	1.146357460052097	1		0.7608698613215067	-0.0529344	1		0.4433469617607429	-0.867856	0.7871056419064758		0.31285695108136324	-1.30511	1		0.010849108755393702	-5.8816	0.9600886191728699
Gm26655	0.0872567	2.264378861047848	1.2482472649649871e-09		0.026486609327956417	0.2164101489243464	0.9806662573244912		0.012628351944644525	-1.12068	0.00708612		0.015297947111856934	-0.743797	0.5227639182719327		0.011288940223829503	-1.11758	0.49838419621627883		0.0629834	1.4835318973520835	0.9797692992332144		0.018557801495646505	-0.234365	1		0.00702133	-1.72617	0.2026531503455014		0	-1.21461	1		0	-3.15751	1
Gm47350	0.35849642124536224	2.1280572234844195	1.3833101619747985e-09		0.10197840595183219	-0.0519738	1		0.0697305	-0.739293	0.0912649		0.0696576	-0.692537	0.4736678394063256		0.048817	-1.16787	0.3319527474028589		0.23618783267412352	1.2248996835652561	0.9797692992332144		0.12433727002083159	0.27025556051158484	1		0.0687087	-0.627245	1		0.073	-0.344326	1		0.00271228	-4.28952	1
Ecm2	0.0493778	2.564316037374235	1.3833101619747985e-09		0.00863047	-0.572533	0.7546787204485615		0.00823588	-0.634782	0.46396959288468437		0.00475276	-1.4485	0.033297299564205754		0.00274596	-2.05404	0.12171311164421768		0.023618783267412354	1.1082824462986505	1		0.012990461046952553	0.33531467444211227	1		0.022067043345557338	1.0151574430205415	0.35176405447019327		0	-0.192663	1		0.00542455	-0.543774	1
Aqp4	0.0696701	2.3505232354697885	1.3833101619747985e-09		0.018153743471970126	-0.00964342	1		0.011090987360079105	-0.889906	0.0786507		0.010842234360830642	-0.865946	0.3716618754481915		0.00823788	-1.17771	0.49838419621627883		0.0449882	1.384914455533167	0.9797692992332144		0.012990461046952553	-0.311721	1		0.010531997960379638	-0.767081	1		0.010428565036045442	0.17112302889978714	1		0	-2.77396	1
Gm21844	0.011498941813530486	3.5684736628478912	1.471610601529631e-09		0.00158721	-0.220322	1		0.000658871	-1.55901	0.13786448925612277		0.000891143	-1.00156	0.9672126100056253		0.000305106	-1.7234	0.6402664460479172		0.00224941	0.8660815438820233	1		0.00185578	0.9948241285283217	1		0	-1.97293	0.6724998790527149		0	2.4691684934500673	1		0	0.5262732407529978	1
Gm13179	0.061215	2.322494421193828	1.504457099172174e-09		0.015574523087974372	-0.0831232	1		0.012518540188604137	-0.47888	0.6209623594569068		0.00772324	-1.21635	0.045334		0.00610213	-1.43643	0.27952655893544703		0.0427388	1.4856012666395477	0.9797692992332144		0.016702021346081855	0.1837268047849019	1		0.00802438	-0.979249	0.8289692059031806		0	-0.664415	1		0	-2.60731	1
Far1os	0.6814814045371744	2.102488208433056	1.5210208456089248e-09		0.1910607099836856	-0.105843	1		0.12848	-0.815748	0.0346584		0.1497119484344834	-0.510958	0.8198242657926873		0.10068514253685772	-1.0682	0.41137183203731836		0.4914956327551999	1.3408152972200358	0.9797692992332144		0.12433727002083159	-0.6869	1		0.15446930341890136	-0.399834	1		0.0312857	-2.29109	1		0.00271228	-5.23438	1
Phxr2	0.037540662979467176	2.4771584961019455	1.5600739910569587e-09		0.011308889375981391	0.4157142638616085	0.8894276215239426		0.00461209	-1.20903	0.0160271		0.00579243	-0.770574	0.674584		0.00244085	-1.86663	0.16799097816657432		0.010122335686033865	0.27226812557860125	1		0.011134680897387903	0.4802509556985646	1		0.00300914	-1.46581	0.531213		0	0.14294026112907865	1		0	-1.79995	1
Gm45188	0.038555275492425746	2.5217198941481493	1.6194538037984208e-09		0.00783686	-0.33024	0.9642408007785861		0.00549059	-0.933126	0.1200656050992712		0.00712914	-0.443382	1		0.00213575	-2.04969	0.12315719562531177		0.014621151546493362	0.7665458703311083	1		0.018557801495646505	1.1410978619059895	1		0.00802438	-0.150294	1		0	0.13437824762565498	1		0	-1.80852	1
3110021N24Rik	0.3125006539912403	2.1513993964541864	1.6313053831795563e-09		0.0855111	-0.105542	1		0.049195666706093454	-1.07884	0.00387799		0.065499	-0.547661	0.8477469492313108		0.054309	-0.781559	0.6721357027933267		0.26768	1.6464113773826226	0.9797692992332144		0.076087	-0.217721	1		0.058176750638287526	-0.651645	1		0.0417143	-0.808594	1		0	-5.07519	1
Olfr1423	0.0338204	2.5949017881255365	1.8540580351825668e-09		0.00773766	-0.0389383	1		0.00549059	-0.651945	0.4820791405176484		0.00371309	-1.21117	0.1696950148558655		0.00183064	-2.00608	0.1716260732231495		0.015745855511608235	1.117620310877987	1		0.011134680897387903	0.712147	1		0.00351067	-1.03612	0.9134679206791918		0	0.37035075723215094	1		0	-1.57254	1
Gm5127	0.402463	2.1165799624043364	1.887882368031266e-09		0.13362345604778011	0.251965	0.9457605653410784		0.0779663	-0.756337	0.0792299		0.0718855	-0.839749	0.19768169600775626		0.0414945	-1.5915	0.059831715162889564		0.26880424766245486	1.2363214291722098	0.9797692992332144		0.11320258912344368	-0.0431025	1		0.0401219	-1.59697	0.15840320344293396		0.0938571	-0.197079	1		0.013561385944242128	-2.8783	1
Dlx1as	0.0825218	2.230398145383932	2.284534705660397e-09		0.022816180319962454	-0.00761255	1		0.018228751502704272	-0.42261	0.6775138918889481		0.013961233286549047	-0.827963	0.347278		0.0048817	-2.25688	0.010466		0.0382399	0.7997746759913298	1		0.014846241196517205	-0.470337	1		0.017553329933966064	-0.368092	1		0	-1.15823	1		0	-3.10112	1
Gm47271	0.12040068487108391	2.3015869315184907	2.3613079338165775e-09		0.031645050095947924	-0.03965	1		0.0174601	-1.08955	0.013349266960148489		0.021238897446558658	-0.706848	0.6608343238431728		0.011594046716365434	-1.53315	0.2102588640540758		0.0978492	1.6874393253386022	0.9797692992332144		0.0296925	-0.0407371	1		0.0235716	-0.449872	1		0	-1.65209	1		0	-3.59499	1
A430090L17Rik	0.2019078900787559	2.123563499201942	2.921551378145969e-09		0.056346	-0.0940999	1		0.03503	-0.937862	0.020044320706307336		0.0441116	-0.500578	0.9581938741197691		0.031120862238665115	-0.979767	0.5450758736170515		0.13496447581378487	1.2479355036583888	0.9797692992332144		0.0890774	0.6287885297234759	1		0.0401219	-0.569805	1		0	-2.52273	1		0	-4.46563	1
Gm26586	0.0304384	2.660462527345458	3.2121967746242345e-09		0.00406723	-0.957288	0.22245777396119684		0.00439247	-0.799174	0.32594411639129794		0.00401014	-0.878182	0.6692075304207027		0.00122043	-2.30544	0.12561496203161046		0.015745855511608235	1.3216342028995802	1		0.0092789	0.6816662432686922	1		0.014544187659571882	1.205634684280227	0.2686436788515967		0	0.5637141299570674	1		0	-1.37918	1
Acsm3	0.020968658601143827	3.001433070123997	3.4798753738815202e-09		0.00347203	-0.310925	0.9873670243337859		0.00208642	-1.14712	0.16250744440355477		0.00178229	-1.28627	0.3933888927568999		0.000915319	-1.87868	0.46384043967735905		0.012371743616263612	1.7695082841869691	0.9823324946927714		0.00371156	0.41472738297898193	1		0.00250762	-0.501787	1		0	1.306438993411958	1		0	-0.636456	1
Dnah17	0.060538546606528146	2.335192925368707	3.5643579101872765e-09		0.013987310543976984	-0.257102	0.9873670243337859		0.012408728432563751	-0.463824	0.6668888617677452		0.010396663085728014	-0.71712	0.6839734865588634		0.00518681	-1.64094	0.195512		0.026992895162756974	0.833601	1		0.033404	1.1578627443853948	1		0.00702133	-1.1395	0.7259558060535567		0.010428565036045442	0.3628301752623564	1		0	-2.58256	1
Slc16a4	0.17180771886098492	2.126378457105996	3.636966899403927e-09		0.0462276	-0.162544	1		0.035469197201045057	-0.635905	0.2427143507752331		0.0331208	-0.704731	0.5127702186455575		0.0210523	-1.31708	0.24548717924457683		0.12034332426729151	1.322818334441255	0.9797692992332144		0.0371156	-0.375819	1		0.0466417	-0.099605	1		0.020857130072090883	-0.701554	1		0	-4.231	1
Cd163l1	0.0483632	2.453837421867326	3.8708247304191815e-09		0.011904094079980412	-0.0248357	1		0.00505134	-1.49206	0.00169294		0.00712914	-0.867099	0.521221		0.0045766	-1.4001	0.4458477443373006		0.024743487232527225	1.1300812860120466	1		0.042682943439986964	1.9306937911086068	1		0.00551676	-1.05659	0.871099		0.073	2.787064834318379	1		0.00271228	-1.17582	1
Bmp8b	0.0466722	2.417650495076602	3.875208749199446e-09		0.010316881535983024	-0.26541	0.9873670243337859		0.00614946	-1.14577	0.0224704		0.00905995	-0.447548	1		0.00518681	-1.19558	0.5487228574870976		0.0371152	1.7615930773600512	0.9797692992332144		0.00556734	-0.695491	1		0.00802438	-0.509375	1		0	-0.209576	1		0	-2.15247	1
Gm31323	0.2343754904934302	2.097417877311117	3.990342792867309e-09		0.0604133	-0.272959	0.9567293115069778		0.050184	-0.597831	0.28789782462962327		0.049458411536391834	-0.580614	0.782061		0.0317311	-1.19538	0.33706501392249644		0.15858325908119722	1.2449996173542148	0.9797692992332144		0.0705196	0.0549093	1		0.063192	-0.135507	1		0.0312857	-0.754761	1		0.00542455	-3.11327	1
Ccdc144b	0.028409150362840023	2.580092746114725	4.029511053903191e-09		0.00724166	0.16470250875858738	1		0.0037336	-1.0137	0.10398686198460308		0.00356457	-1.00911	0.4214811256225722		0.00183064	-1.76039	0.302005		0.013496447581378487	1.1521775329143562	1		0.00371156	-0.288709	1		0.00351067	-0.789483	1		0	0.6104451803020581	1		0	-1.33245	1
Gm15423	0.0233361	2.730224732844503	4.1728597781873866e-09		0.00634885	0.4444933869565544	0.9455071295329556		0.00208642	-1.50602	0.012237316586546868		0.00237638	-1.20857	0.2731445559586403		0.000915319	-2.20257	0.2182989491300589		0.012371743616263612	1.4290177382731795	1		0.00371156	0.0927993	1		0.00100305	-1.85326	0.4656955935683968		0	0.988363	1		0	-0.954532	1
Snhg14	0.21137760686636922	2.1011782702225013	4.1728597781873866e-09		0.0655717	0.0950825	1		0.0418383	-0.731642	0.11517700340043605		0.040695509792706794	-0.728364	0.43718457497434376		0.0183064	-1.84959	0.021863044770978557		0.16308207494165672	1.448917295710885	0.9797692992332144		0.053817624337374866	-0.175425	1		0.0371128	-0.770118	0.931336		0.020857130072090883	-1.01869	1		0.013561385944242128	-1.95967	1
Gm15558	0.043290133886232415	2.4179964236338014	4.1728597781873866e-09		0.010019279183983513	-0.177254	1		0.0074672	-0.693424	0.34825427494916483		0.00683209	-0.783025	0.6521743358428317		0.00549192	-1.00093	0.6627161249172476		0.019119967406952855	0.8997646701383122	1		0.022269361794775806	1.147200928759787	1		0.00351067	-1.51786	0.4627167544214344		0	-0.101367	1		0	-2.04426	1
Pdzk1	0.0395699	2.47748	4.439376838364893e-09		0.00952328	-0.0466743	1		0.00538078	-1.04444	0.061243		0.00460424	-1.21357	0.12055305414524288		0.00244085	-1.94371	0.14994775542190006		0.023618783267412354	1.3835401077553557	1		0.016702021346081855	0.9306937911086077	1		0.0100305	0.10177308532652152	1		0	0.0676521	1		0.00542455	-0.282107	1
4931403E22Rik	0.18093923147761207	2.1108821031408898	4.453307945684469e-09		0.046425966911923605	-0.268719	0.95824		0.034371079640641185	-0.793851	0.0741591		0.0433689	-0.354967	1		0.0396638	-0.453741	0.9432866341169709		0.12259273219752126	1.259887829185458	0.9797692992332144		0.0668081	0.36679290591528035	1		0.018054853646365096	-1.57927	0.2078044413669273		0.020857130072090883	-0.787422	1		0.00271228	-3.31603	1
Olfr323	0.025027108652978115	2.842038736173855	4.612785003671554e-09		0.00367043	-0.654219	0.7933984575688018		0.00197661	-1.62233	0.010339684844461993		0.00282195	-0.982519	0.6823972933274981		0.00152553	-1.6332	0.5210746284579844		0.013496447581378487	1.520110797066157	1		0.024125141944340456	2.370839738977982	1		0.00351067	-0.430402	1		0.0417143	3.3102913189075647	1		0.00271228	0.022506822879822863	1
Ccr9	0.0862421	2.2144580861119607	4.857011546170217e-09		0.023510585807961313	-0.0511549	1		0.015593269357734979	-0.787508	0.1212671075085762		0.018119898520840252	-0.486415	0.9936495120048627		0.00518681	-2.24886	0.011624581182379027		0.0686069	1.5941250623589234	0.9797692992332144		0.0296925	0.38521410273596857	1		0.00902743	-1.397	0.436802		0.020857130072090883	0.35534859389290485	1		0.00271228	-2.17417	1
Slc26a10	0.048025	2.5039047496409736	4.857011546170217e-09		0.00882887	-0.531524	0.8307443314911099		0.009334	-0.414503	0.7636256610071896		0.00475276	-1.4485	0.0343367		0.0048817	-1.26397	0.5603302333879416		0.023618783267412354	1.1082824462986505	1		0.027836702243469756	1.3632612149450276	1		0.010531997960379638	-0.102044	1		0	-0.192663	1		0.00542455	-0.543774	1
Gm16189	0.0899623	2.2751540177995144	4.98464875160073e-09		0.021725	-0.22904	0.9873670243337859		0.018118939746663884	-0.548427	0.48641566428346744		0.012030424427770987	-1.16809	0.0590848		0.0094583	-1.41371	0.3099143538230313		0.0629834	1.4446333511827882	0.9797692992332144		0.038971383140857664	0.7471058074349752	1		0.021063995920759276	-0.196537	1		0	-1.25101	1		0.00271228	-2.19227	1
Gm28375	0.6321035955731905	2.055204437539475	5.174833865941636e-09		0.17776780492770747	-0.146308	1		0.13506845992967623	-0.639653	0.16482034639951867		0.13188909743037824	-0.636252	0.5831809451772608		0.1107536567905435	-0.846064	0.6203397380590324		0.43750984242968594	1.241710658602631	0.9797692992332144		0.24681875989209853	0.38058043681010334	1		0.11133826415258476	-0.811573	0.8709310454997283		0.1251427804325453	-0.514591	1		0.00813683	-4.15981	1
Gm49173	0.0219833	2.9132690405046233	5.572274621765381e-09		0.00386883	-0.267628	1		0.00175699	-1.54784	0.0238728		0.00267343	-0.810164	0.9228984382235498		0.000610213	-2.42496	0.22580118996768944		0.015745855511608235	1.9912089313356782	0.9797692992332144		0.011134680897387903	1.5519524210527527	1		0.00100305	-1.65279	0.704742		0	1.1865295296767613	1		0	-0.756366	1
Gm15336	0.0341586	2.6168512961248425	6.3553956309198385e-09		0.00615045	-0.471861	0.9455071295329556		0.00417285	-1.11023	0.0756709		0.00504981	-0.731893	0.8914041684007571		0.00183064	-2.00608	0.2102588640540758		0.011247	0.649176	1		0.012990461046952553	0.9099352309418096	1		0.013541140234773822	0.878147	0.6087416131568947		0.010428565036045442	1.3753863471294494	1		0	-1.57254	1
Akap3	0.0635824	2.3111175692566124	6.408819444850137e-09		0.0172609	0.034491477575008034	1		0.00790645	-1.32795	0.00269974		0.013961233286549047	-0.330695	1		0.00915319	-0.914632	0.6710183113002802		0.0359905	1.1630056326394902	1		0.025980922093905106	0.7172901529994142	1		0.00351067	-2.15239	0.11604306612728775		0.020857130072090883	0.8628323419363433	1		0	-2.66973	1
Galnt16	0.17349873971591587	2.0958188570112704	6.442428919050357e-09		0.054957234335909565	0.13225588627373064	1		0.028002	-1.08219	0.004751		0.041586652342912055	-0.367638	1		0.029900436268521385	-0.831007	0.6562097009503486		0.091101	0.8658108947787264	1		0.0853659	0.7704398595181785	1		0.011535	-2.16344	0.029852605025574817		0.0417143	0.00076025	1		0.00813683	-2.26484	1
Gm29114	0.0453194	2.390475360869897	6.621940361414834e-09		0.011408090159981227	-0.0394738	1		0.00647889	-1.03256	0.0486856		0.00846585	-0.531954	0.9936495120048627		0.00305106	-1.90607	0.13236518930681962		0.0359905	1.7405506617981636	0.9797692992332144		0.00556734	-0.671588	1		0.00551676	-1.00487	0.871099		0	-0.185842	1		0	-2.12874	1
Gm49970	0.0395699	2.4653610066424703	6.721542551342351e-09		0.00803526	-0.381096	0.9457605653410784		0.00878494	-0.204301	0.934445		0.00504981	-1.07982	0.23835101492479668		0.00213575	-2.12609	0.0997273		0.021369375337182604	1.2288101698948246	1		0.00742312	-0.0982853	1		0.00651981	-0.52155	1		0	0.059524252941440814	1		0	-1.88337	1
Kcnj13	0.13325244336855915	2.1220295962533053	7.1476674001065925e-09		0.037299494783938625	-0.0895637	1		0.024597833353046727	-0.832517	0.06398		0.0271798	-0.614364	0.7478593031452371		0.00884809	-2.20257	0.00706395		0.10009865289522378	1.42902	0.9797692992332144		0.031548262542599056	-0.2338	1		0.031595993881138915	-0.301303	1		0.0312857	0.0778768	1		0.0813683	1.1171520000836654	1
Slc7a15	0.10349047632177437	2.1588398226697314	8.976282966485869e-09		0.031149046175948745	0.0920955	1		0.020315174867471628	-0.694129	0.20868390720560703		0.019159564829413053	-0.741511	0.5136071125511631		0.015560431119332557	-0.978564	0.5929233414945135		0.049487	0.7855113351508871	1		0.038971383140857664	0.4569907148868584	1		0.011535	-1.3608	0.4445826178786866		0.010428565036045442	-0.533521	1		0	-3.47776	1
3300002A11Rik	0.13088501417165582	2.09481	8.985544969033323e-09		0.040573120655933236	0.0870181	1		0.023280092280562083	-0.918875	0.0280409		0.027476895297995466	-0.589322	0.7874166526967217		0.018001283059620017	-1.16443	0.39837578295374837		0.0731058	0.9620185749063137	1		0.0519618	0.47198333971496353	1		0.0265808	-0.550696	1		0.0417143	0.40700553163044884	1		0	-3.86194	1
Stx19	0.046334	2.330014376669369	9.04719015302436e-09		0.012896101919978779	0.10344233191316299	1		0.00856532	-0.647546	0.3877592808912216		0.006238	-1.10297	0.14317693697243136		0.00427149	-1.52031	0.2989761191589222		0.0258682	1.1707729338440807	1		0.0092789	-0.153896	1		0.00702133	-0.748142	1		0	-0.259158	1		0	-2.20205	1
Papss2	0.0368643	2.4257406906890937	9.987887385379393e-09		0.00793606	-0.306737	0.9771372543833708		0.00713776	-0.48399	0.6865435448118058		0.00490128	-1.04339	0.2803541779697232		0.00274596	-1.71902	0.25484108669749295		0.0202447	1.229486274745545	1		0.016702021346081855	0.9992025690388973	1		0.00702133	-0.339799	1		0	0.13437824762565498	1		0	-1.80852	1
Gm14211	0.0426137	2.523902220448867	1.0594856161639018e-08		0.010316881535983024	0.00742323	1		0.00362379	-1.75755	0.000490609		0.00757471	-0.50866	1		0.00396638	-1.3635	0.5326427809764596		0.023618783267412354	1.3034868561893207	1		0.012990461046952553	0.5235184096027341	1		0.0085259	-0.212648	1		0	-0.00777414	1		0	-1.95067	1
Gm13708	0.5803583574123033	2.017674936183986	1.0919907349883148e-08		0.1705261476957194	-0.0978384	1		0.13056617793202036	-0.582468	0.2433726454673198		0.12372029072016337	-0.632173	0.5874505943149027		0.0747511	-1.3378	0.16799097816657432		0.392522	1.1777413033155584	0.9797692992332144		0.20970315690080552	0.24047645613388013	1		0.14243273432132464	-0.344245	1		0.0938571	-0.797898	1		0.00271228	-5.06451	1
C78334	0.040922704689329084	2.414322102824264	1.13339272967324e-08		0.00972168	-0.130125	1		0.00691814	-0.730247	0.3176167119637969		0.00475276	-1.26424	0.083918		0.00396638	-1.37944	0.473864		0.0337411	1.818891313997936	0.9797692992332144		0.014846241196517205	0.6816662432686922	1		0.00551676	-0.837577	1		0	-0.023163	1		0	-1.96606	1
Gm12705	0.022997883627060973	2.6972914587316037	1.223333780953654e-08		0.00496004	-0.0609667	1		0.00252567	-1.20822	0.067046		0.00267343	-1.03113	0.5528236353845679		0.00152553	-1.60184	0.505657		0.013496447581378487	1.5527154624980843	1		0.00556734	0.5156562918297629	1		0.00351067	-0.398693	1		0	0.988363	1		0	-0.954532	1
Gm47272	0.0635824	2.2161044543963926	1.2308817611315549e-08		0.018649747391969312	0.0971598	1		0.010651740335917556	-0.913674	0.0608793		0.010842234360830642	-0.823547	0.42639988254082606		0.0048817	-1.88386	0.0680548		0.0404893	1.2673875155625893	0.9902133188032591		0.020413581645211155	0.32040000043082895	1		0.016550282509168002	-0.0720426	1		0	-0.793417	1		0	-2.73631	1
Gm28085	0.054450871528776715	2.2422341862210455	1.2793796239912287e-08		0.0156737	0.085066	1		0.00911438	-0.891932	0.0800832		0.00891143	-0.866308	0.3918891263385212		0.00610213	-1.32011	0.39837578295374837		0.024743487232527225	0.7991428156764497	1		0.025980922093905106	0.8962602940447333	1		0.0120366	-0.285352	1		0	-0.552205	1		0.00271228	-1.49245	1
Gm47460	0.0449812	2.32086	1.2828317856731229e-08		0.012003294863980248	0.0099752	1		0.00636908	-1.10373	0.0251625		0.00816881	-0.63307	0.8786419098844039		0.0045766	-1.38636	0.40165124996870183		0.0359905	1.7004225490928535	0.9797692992332144		0.016702021346081855	0.6332258882109398	1		0.00451371	-1.31283	0.6266987744206346		0	-0.222966	1		0	-2.16586	1
Gm48228	0.15253008111477204	2.0761477842623424	1.3062444775960772e-08		0.043053140255929156	-0.118416	1		0.0329435	-0.600751	0.30341937962251236		0.030892941740448956	-0.664679	0.6041963387014063		0.0231881	-1.03244	0.5129327024292061		0.10234806082545353	1.2206435995485494	0.9797692992332144		0.024125141944340456	-0.830265	1		0.0371128	-0.300073	1		0.020857130072090883	-0.56628	1		0	-4.09589	1
Gm50035	2.133391910580891	1.987515017538527	1.3247871099356891e-08		0.6463923085429364	-0.0676715	1		0.49085854950053065	-0.570311	0.25206435510549857		0.5009706369737227	-0.49744	0.8433871992807935		0.34141416514770845	-1.03813	0.344672		1.258543736963544	0.9443648274301215	1		0.8462357482014806	0.34583804879869484	1		0.35407574095371547	-0.955371	0.6904891710585265		0.2815712559732269	-1.21276	1		0.0244105	-4.64216	1
2210409D07Rik	0.0226597	2.7130666113841455	1.4432622219229575e-08		0.00416643	-0.348647	0.9816378733691982		0.00362379	-0.576983	0.6855176330741395		0.00163376	-1.71948	0.0400189		0.00183064	-1.33925	0.6300009032277544		0.012371743616263612	1.4621846022083789	1		0.00742312	0.8773305655098822	1		0.00401219	-0.188126	1		0	1.0195578456237966	1		0	-0.923337	1
Gm45509	0.40753602603835987	2.01267	1.4652762011947055e-08		0.1082280553438219	-0.297908	0.9457605653410784		0.0864219	-0.690475	0.13112683893398558		0.10129320320666436	-0.379067	1		0.0878707	-0.560716	0.8350333301458103		0.2935477348949821	1.271157155909799	0.9797692992332144		0.15217397226430135	0.2894901434112276	1		0.0727209	-0.821287	0.8623795480295442		0.052142825180227205	-1.02921	1		0.00271228	-4.55834	1
Nron	0.0530981	2.2443336931832443	1.5139977095137087e-08		0.016070527007973557	0.189806	0.9873670243337859		0.00889475	-0.888646	0.0888543		0.009357	-0.745461	0.6230091737365168		0.0045766	-1.68743	0.16432931406367451		0.024743487232527225	0.8383641254741683	1		0.0296925	1.121056539943237	1		0.00601828	-1.22321	0.6351221269094321		0.010428565036045442	0.48813377179381323	1		0	-2.45749	1
Dnmt3aos	0.08286	2.147649812380137	1.516684129454297e-08		0.020137759151966864	-0.3358	0.9457605653410784		0.013836281261088785	-0.978323	0.027043265590884477		0.014406804561651677	-0.850312	0.3198699644371534		0.010373620746221704	-1.25016	0.3846488822865592		0.0483623	1.078169854404992	1		0.027836702243469756	0.3062029262008137	1		0.0481463	1.1043581616266787	0.12980838387453195		0.0417143	1.105641719706103	1		0.00542455	-1.57756	1
1700027A07Rik	0.0449812	2.311269216394072	1.590019192818882e-08		0.013094503487978453	0.1767485312955781	1		0.00658871	-1.05564	0.0368027		0.00861438	-0.55396	0.9936495120048627		0.00335617	-1.82196	0.14576770335999464		0.0224941	0.9988367527337942	1		0.022269361794775806	1.015144112907918	1		0.00351067	-1.64831	0.38278613111465865		0.010428565036045442	0.7737064514633598	1		0	-2.17251	1
Gm15511	0.024350700311005734	2.607320133683623	1.598090166894468e-08		0.00486084	-0.286124	0.9873670243337859		0.00362379	-0.782792	0.3683080454778646		0.003119	-0.950132	0.5965691086364945		0.00183064	-1.51551	0.49618732489467215		0.012371743616263612	1.2811190431608663	1		0.00742312	0.702935	1		0.00401219	-0.366272	1		0.010428565036045442	1.855777584402393	1		0	-1.09414	1
Gm47376	0.024688904481991927	2.5741	1.611986607910181e-08		0.00525764	-0.193355	1		0.00395322	-0.685605	0.492182		0.00356457	-0.788915	0.8025369214360684		0.000915319	-2.38636	0.11379338026960141		0.0168706	1.6814350367329443	0.9797692992332144		0.00742312	0.6607066246330469	1		0.00150457	-1.6142	0.5776734287433298		0	0.8073372293446397	1		0	-1.13556	1
Gm5089	0.0842128	2.2181478692122796	1.6373872170491136e-08		0.020137759151966864	-0.300556	0.9574078066502625		0.0197661	-0.323798	0.7962063574387559		0.013961233286549047	-0.870569	0.34727034134357027		0.011288940223829503	-1.09819	0.5557215751014091		0.0472376	1.071540128139624	1		0.018557801495646505	-0.215596	1		0.015547235084369943	-0.58456	1		0.020857130072090883	0.39229973006579577	1		0.00271228	-2.13726	1
Far2	0.0713611	2.1891374067961227	1.6385014241719336e-08		0.0180545	-0.220322	0.9873670243337859		0.011640046140281041	-0.981872	0.0338832		0.016783184695532364	-0.316755	1		0.00701745	-1.56165	0.19064128931396224		0.0629834	1.7376331784158694	0.9797692992332144		0.00742312	-1.14467	1		0.017553329933966064	-0.179859	1		0	-0.97847	1		0	-2.92137	1
Gm37229	0.4285046846395037	2.0068800806210616	1.6638127628364246e-08		0.14185712111976656	0.13062857466405786	1		0.0800528	-0.913623	0.017216782824487034		0.10753120105810117	-0.367867	1		0.068649	-1.01712	0.4690430768182723		0.2643054318019954	1.0309954506934078	1		0.12433727002083159	-0.0806383	1		0.0561707	-1.28019	0.3786938871611307		0.0625714	-0.883197	1		0	-5.63525	1
Gm26562	0.0233361	2.6470834975442585	1.6769074979683697e-08		0.00585285	0.19471507782502684	1		0.00197661	-1.64713	0.00499266		0.00341605	-0.711072	0.9708712655572562		0.00122043	-1.92693	0.3349162990438308		0.014621151546493362	1.6109958911637206	0.9862338045678373		0.00371156	0.0392182	1		0.00250762	-0.88412	1		0	0.9353448417207115	1		0	-1.00755	1
Angpt2	0.1498244477468825	2.0783282867751196	1.7307628615177238e-08		0.0387875	-0.282745	0.9567293115069778		0.0326141	-0.584965	0.34002810383613435		0.028962132881670894	-0.739206	0.4612902698557738		0.014950218134260692	-1.6517	0.0786044		0.12146802823240638	1.510383235801418	0.9797692992332144		0.061240744935633466	0.4955040334331371	1		0.0491493	0.15171213737692746	1		0.0312857	-0.122954	1		0.00271228	-3.06763	1
Gm17231	2.2118552782496876	1.9765635106626724	1.7477809420076724e-08		0.6723829139508936	-0.0722315	1		0.4102567205668865	-0.952948	0.00711697		0.615928	-0.216984	1		0.5253933801468758	-0.443073	0.8732460281185874		1.482359826021404	1.1292539407942295	1		0.721898	0.051874057946481644	1		0.23822376338953946	-1.60167	0.12749636488016744		0.19814273568486337	-1.7589	1		0.016273663133090553	-5.21712	1
Rsf1os2	0.38622916326622986	2.008745078762364	1.8076869714535582e-08		0.1195369447198033	-0.00389896	1		0.0759897	-0.823476	0.0433725		0.0859953	-0.567096	0.7778615684462564		0.0723102	-0.779247	0.6643157160241636		0.27105365559268463	1.2287040334473187	0.9797692992332144		0.10577946852518508	-0.160116	1		0.0797423	-0.60728	1		0.052142825180227205	-0.95459	1		0.00271228	-4.48379	1
Fer1l5	0.021645066943116208	2.7644855918886853	1.8560771180291095e-08		0.00367043	-0.453522	0.9457605653410784		0.00285511	-0.860648	0.3683080454778646		0.003119	-0.64757	0.9940290451515021		0.00152553	-1.46908	0.6088441203499086		0.00899763	1.1246837034005566	1		0.00556734	0.6469008251080162	1		0.00300914	-0.465807	1		0	1.117405169021941	1		0	-0.82549	1
Tubb4a	0.020968658601143827	2.937302732704281	1.9630428496132772e-08		0.00367043	-0.257797	1		0.00175699	-1.45669	0.0491124		0.00237638	-0.899244	0.8685577363566275		0.000610213	-2.34197	0.32927504130168933		0.00899763	1.283587298751617	1		0.0092789	1.4050122281457709	1		0.00351067	-0.106512	1		0	1.2684711432129374	1		0	-0.674424	1
Gm15635	0.526584	1.9877451288997712	2.033848679904061e-08		0.1854062652956949	0.2384021670096197	0.9550879500541269		0.10816457969978137	-0.768051	0.0549273		0.11228396132586255	-0.656941	0.5359175067804971		0.0634622	-1.45923	0.0974448		0.31716651816239444	0.9792665452017772	1		0.265377	0.7053175113333376	1		0.0692103	-1.29297	0.3560613526669863		0.0834285	-0.831793	1		0.010849108755393702	-3.62366	1
Ccdc7a	0.040922704689329084	2.3644735533737027	2.2294401120839325e-08		0.011408090159981227	0.14047203304104006	1		0.00428266	-1.55249	0.00117911		0.00757471	-0.56576	0.9936495120048627		0.00183064	-2.4415	0.0317704		0.0337411	1.7819497356097989	0.9797692992332144		0.00742312	-0.216282	1		0.00802438	-0.350759	1		0.0312857	1.9540571019828823	1		0	-2.00009	1
Gm15461	0.0135282	2.98316	2.242324880702341e-08		0.00267842	0.022247881820261384	1		0.00175699	-0.705716	0.6655790232307547		0.00103967	-1.38598	0.3895186953244005		0.000305106	-2.27892	0.3968270201729821		0.00224941	0.3034868561893198	1		0.00185578	0.43930540569964727	1		0.00150457	-0.476696	1		0	1.92055	1		0	-0.0223474	1
Gm43190	0.0399081	2.367175273146068	2.3008052499455287e-08		0.010614483887982534	0.0480652	1		0.00439247	-1.47039	0.00248251		0.0087629	-0.279631	1		0.0048817	-1.08339	0.6322294698592195		0.024743487232527225	1.359443262163336	1		0.012990461046952553	0.511741	1		0.00300914	-1.63087	0.43709280430030517		0	-0.0193312	1		0	-1.96223	1
Gm16541	0.812028	1.9778376537003757	2.492009989576695e-08		0.22538418124762913	-0.247775	0.9567293115069778		0.18096977395455807	-0.635091	0.1683508032053358		0.19961593124597787	-0.428406	0.9875977434213692		0.17543623320816118	-0.587063	0.8061364362530384		0.5769731341039304	1.2208200480353817	0.9797692992332144		0.21155893705037015	-0.26821	1		0.17051806221567034	-0.609881	1		0.11471421539649986	-1.04892	1		0.00813683	-4.57803	1
Gm45235	0.0426137	2.33272	2.536217606326062e-08		0.00902727	-0.420137	0.9457605653410784		0.00790645	-0.63812	0.42792174167276914		0.00668357	-0.858446	0.521221		0.00396638	-1.49736	0.3671859251903795		0.026992895162756974	1.3623805452428899	0.9923070469855888		0.016702021346081855	0.7209014065517927	1		0.013541140234773822	0.3268676895860958	1		0	-0.137168	1		0	-2.08006	1
5330438D12Rik	5.684535705935894	1.9503788586568884	2.728450385263848e-08		1.6740132299972454	-0.160839	0.997077		1.3627638924612049	-0.531306	0.3146535802731191		1.3753300024834487	-0.479461	0.8786419098844039		1.1835080845468822	-0.667314	0.6753672959827646		4.19515	1.2551960729569975	0.9797692992332144		1.130170111084872	-0.692913	1		0.906755	-1.04374	0.4459204010266122		0.5839996420185447	-1.6289	1		0.0596701	-4.88187	1
Xpnpep2	0.0561419	2.3088683444667666	2.7943535988335807e-08		0.015475322303974534	0.0630711	1		0.00878494	-0.950645	0.0805743		0.010545186844095557	-0.590901	0.9708712655572562		0.0045766	-1.7234	0.19900336959836065		0.0337411	1.2548681509691422	1		0.025980922093905106	0.8989849313812694	1		0.00300914	-2.16826	0.13929517492462903		0.0417143	1.7830443160426963	1		0	-2.49245	1
Gm16599	2.229780099311956	1.9533982694810632	2.800977328178673e-08		0.6245681360629722	-0.25436	0.9516120589401545		0.5952895294949389	-0.334299	0.7182642636002227		0.4619088885230589	-0.734451	0.27575903966209947		0.3411090586551725	-1.13268	0.24526152688261432		1.5813337749515128	1.1972676066304815	1		0.7849950032658471	0.14514409760528935	1		0.6148680714012112	-0.221223	1		0.39628547136972675	-0.823196	1		0.016273663133090553	-5.24594	1
4930563I02Rik	0.0304384	2.413950577424326	2.800977328178673e-08		0.00892807	0.29500589143028666	0.9634300068106364		0.00472191	-0.871013	0.1954370872587858		0.00490128	-0.744916	0.8126461004940608		0.00183064	-1.97494	0.18144776772411195		0.012371743616263612	0.8116337598596459	1		0.0092789	0.5156562918297629	1		0.00100305	-2.446	0.12943365332837922		0	0.40083136368691274	1		0	-1.54206	1
Gm42788	0.041260908860315276	2.317574813822449	3.073692526018693e-08		0.011209688591981555	0.042712	1		0.00614946	-1.02059	0.0566526		0.00712914	-0.714684	0.7874838945265892		0.00274596	-1.9607	0.1142743157271787		0.026992895162756974	1.4004485860764095	0.9797692992332144		0.033404	1.7172901529994133	1		0.00351067	-1.51786	0.46661183282893043		0	-0.101367	1		0	-2.04426	1
Paqr3	0.2719161534728974	1.97152	3.105734509419956e-08		0.0865031	0.012944405556747807	1		0.0602867	-0.649186	0.19173840118381946		0.0641623	-0.501502	0.9175301630696808		0.0396638	-1.18183	0.3259562663181713		0.15745855511608234	0.911657	1		0.0946448	0.1655375310181202	1		0.0571737	-0.605348	1		0.020857130072090883	-1.4769	1		0.013561385944242128	-2.4184	1
Fbxl2	0.3513941336546522	1.9823906222328198	3.21856893105199e-08		0.0938439	-0.31657	0.9457605653410784		0.0782958	-0.630921	0.21018044931608576		0.0879261	-0.393789	1		0.0704796	-0.694467	0.7368525978261484		0.2553078000810764	1.2613955227002884	0.9797692992332144		0.0705196	-0.621189	1		0.0952895	-0.218535	1		0.0417143	-1.101	1		0.00542455	-3.78159	1
1500035N22Rik	0.0683172	2.163078745443214	3.344222195003208e-08		0.0177569	-0.193355	1		0.012518540188604137	-0.806882	0.12698168070907861		0.012624519461241159	-0.73732	0.5831809451772608		0.0109838	-0.864013	0.6771767370744448		0.0461129	1.3120999864940295	0.9797692992332144		0.033404	0.8546038609421025	1		0.015547235084369943	-0.311982	1		0.020857130072090883	0.6546537798195962	1		0	-2.87728	1
Gm9984	0.0547891	2.188456729717731	3.381731398552751e-08		0.0158721	0.044505266203028526	1		0.00977325	-0.82947	0.12200387608328621		0.0111393	-0.558033	0.969883		0.00610213	-1.36884	0.3676289432449974		0.029242303092986723	0.9922851678950178	1		0.011134680897387903	-0.272368	1		0.010531997960379638	-0.526893	1		0.020857130072090883	0.9909371676840282	1		0	-2.54206	1
Gm17178	0.19209996912015637	1.9974336935774888	3.432241014180995e-08		0.0537668	-0.21233	0.9873670243337859		0.043375643635952935	-0.593356	0.2980893467215737		0.0444086	-0.512776	0.91971		0.0323413	-0.943161	0.5774262962724163		0.12484214012775101	1.1087300017670727	1		0.0965006	0.7241114188554278	1		0.043131	-0.483487	1		0.020857130072090883	-0.956595	1		0	-4.48579	1
Gm50232	0.19311458163311493	1.9986985095235106	3.432241014180995e-08		0.0634885	0.10762004396112346	1		0.0379949	-0.831306	0.051687168838253555		0.0463394	-0.449251	0.9936495120048627		0.0329515	-0.922047	0.5888831893992389		0.12259273219752126	1.0743184638274963	1		0.046394503739116265	-0.328449	1		0.028085327894345705	-1.12107	0.5796875885192587		0.0417143	-0.224963	1		0	-4.49245	1
1700094J05Rik	0.046334	2.311338451908945	3.4824067614210853e-08		0.0107137	-0.276567	0.9873670243337859		0.00801626	-0.77692	0.2378999164727256		0.00846585	-0.631226	0.9174848743470168		0.0045766	-1.43723	0.40088554987200536		0.0359905	1.6474412574066823	0.9797692992332144		0.012990461046952553	0.25458340232925547	1		0.00902743	-0.407105	1		0	-0.272097	1		0	-2.21499	1
Gm43332	0.024688904481991927	2.503213572010311	3.758297577960359e-08		0.00634885	0.1108834870215567	1		0.00307473	-1.15507	0.061798453826975214		0.00371309	-0.777656	0.8279711571973642		0.00152553	-1.83551	0.3119843159161371		0.019119967406952855	1.815200374879839	0.9797692992332144		0.00371156	-0.13737	1		0.00200609	-1.3331	0.7400999704369986		0	0.7604706243066657	1		0	-1.18242	1
Gm45670	0.025027108652978115	2.5029500901283095	3.8101255706315877e-08		0.00555524	-0.177509	1		0.0037336	-0.860932	0.24962520528000637		0.00356457	-0.863683	0.6831065766775453		0.00152553	-1.85559	0.29243545387904374		0.012371743616263612	1.167350168203292	1		0.00556734	0.2644311882856023	1		0.00651981	0.19315574499853483	1		0	0.7408418175577332	1		0.00271228	-0.19554	1
Pcnx2	0.0564801	2.1754624698990463	3.990375769729609e-08		0.0172609	0.1398941581579196	1		0.00900456	-1.02925	0.0286836		0.0121789	-0.47181	0.9973207600442331		0.00884809	-0.885855	0.6753672959827646		0.032616414988331344	1.0966352857486514	1		0.012990461046952553	-0.130707	1		0.00501524	-1.6098	0.32802		0.020857130072090883	0.9378258312244663	1		0	-2.59499	1
Kcnab1	0.18837972323930827	2.030277249054817	4.028126274023738e-08		0.0480132	-0.358277	0.9455071295329556		0.0388734	-0.721341	0.14345908240182856		0.0421807	-0.537947	0.8994688480575913		0.039968950522207156	-0.566824	0.8540348168668479		0.13159036391844026	1.2436154002119224	0.9797692992332144		0.050106064038245565	-0.160454	1		0.063192	0.14594295952639236	1		0.0417143	-0.165875	1		0	-4.43347	1
Gm46189	0.0436283	2.423803536935962	4.047410156890529e-08		0.00962248	-0.263824	0.9873670243337859		0.00790645	-0.603354	0.5478641381465634		0.00638652	-0.898531	0.5536963065544435		0.00335617	-1.69767	0.31579113157742816		0.030367007058101594	1.5678099579916882	0.9797692992332144		0.00185578	-1.60103	1		0.00802438	-0.40434	1		0.0312857	1.9022624867648812	1		0	-2.05149	1
Gm15354	0.0639206	2.146549777983808	4.056026903080169e-08		0.020633763071966047	0.22337627091888468	0.9806662573244912		0.0113106	-0.879845	0.0750446		0.0106937	-0.909945	0.2647265511159017		0.00793277	-1.25279	0.4228705617029975		0.0517364	1.574987354842957	0.9797692992332144		0.0092789	-0.750859	1		0.0085259	-1.08564	0.7257618299096228		0.020857130072090883	0.7386772334444105	1		0	-2.7935	1
Gm45479	0.0764341	2.1277388991477646	4.3404372787391844e-08		0.0205346	-0.163739	1		0.017569880966461948	-0.442332	0.6687761951937105		0.013664185769813961	-0.820823	0.4124745618303501		0.00732256	-1.64802	0.13789309893910215		0.0551105	1.3812890077929545	0.9797692992332144		0.031548262542599056	0.5834344062646233	1		0.0125381	-0.817425	0.96064		0.0625714	1.6969541735567328	1		0	-3.06406	1
Mboat1	0.35545258370648647	1.9688744606373163	4.371489554780395e-08		0.13640107799977555	0.40181131206496357	0.7353935875804449		0.062482889186980306	-1.04899	0.00410781		0.0855497	-0.471041	0.9757982523006065		0.044850654402782075	-1.4025	0.1392546940996601		0.22719020095320452	1.056307628572101	1		0.10577946852518508	-0.068585	1		0.0346051	-1.73901	0.0952423		0.0625714	-0.64145	1		0.010849108755393702	-3.07048	1
Omd	0.025027108652978115	2.5324943657423242	4.446124271605125e-08		0.00486084	-0.400895	0.9489378470190677		0.00395322	-0.741873	0.42109925592169656		0.0025249	-1.36647	0.11982052486036551		0.00122043	-2.10527	0.2011285240022576		0.00562352	0.14698237050933027	1		0.00371156	-0.13737	1		0.015547235084369943	1.538571103344177	0.056902113247952135		0	0.7604706243066657	1		0	-1.18242	1
Gm15886	0.48769041456208706	1.9588496213946955	4.487206512871034e-08		0.14592435326375988	-0.121277	1		0.11607102613468924	-0.536026	0.32624713577607467		0.10708562978299854	-0.632922	0.5938905380209026		0.0912268	-0.8206	0.6322294698592195		0.365529	1.2889015460469213	0.9797692992332144		0.11691414942257299	-0.394106	1		0.10331388475420027	-0.608887	1		0.073	-0.9126	1		0.00542455	-4.27182	1
Gm50034	0.0700083	2.0912673424826176	4.560729856487001e-08		0.0208322	0.00093088	1		0.015044210577533043	-0.593889	0.3725431447607266		0.015594994628592021	-0.490112	0.9936495120048627		0.00793277	-1.42993	0.24043694736442575		0.0438635	1.1456346870475835	1		0.016702021346081855	-0.178012	1		0.00952895	-1.10455	0.6658172477040107		0	-1.02125	1		0	-2.96414	1
Flrt1	0.055465484041735284	2.2499941373200656	4.560729856487001e-08		0.014284912895976495	-0.127876	1		0.010432116823836782	-0.686715	0.3236711243210957		0.0102481	-0.664779	0.8268078764764416		0.00396638	-1.94579	0.0919128		0.029242303092986723	1.0194553690604877	1		0.025980922093905106	0.8746464809386705	1		0.011535	-0.369001	1		0.020857130072090883	1.0169323762169729	1		0.00271228	-1.51355	1
D830024N08Rik	0.30201632469066836	1.952883858326696	4.562373999297015e-08		0.0913639	-0.105845	1		0.0677539	-0.645459	0.19691851196022478		0.0791632	-0.340558	1		0.051257890746036656	-0.969868	0.5309869901194033		0.1642067789067716	0.8018527390670607	1		0.0983563	0.0530602	1		0.0646966	-0.593125	1		0.14599991050463618	0.684758	1		0.00271228	-4.17043	1
Gm49961	0.13832550593335202	2.065032781806298	4.562373999297015e-08		0.0362083	-0.274478	0.9642408007785861		0.027013691985935246	-0.785322	0.10494834831757494		0.0350516	-0.298916	1		0.026544264850626127	-0.689214	0.7773676781404293		0.0742305	0.8787251699067951	1		0.042682943439986964	0.090851	1		0.0351067	-0.243928	1		0.020857130072090883	-0.433409	1		0	-3.96319	1
Ccdc78	0.0835364	2.075837301913012	4.7192352039846094e-08		0.021725	-0.276065	0.9642408007785861		0.017350257454381172	-0.667708	0.2510529737749007		0.018268422279207795	-0.535011	0.9542267697319989		0.015255324626796624	-0.746359	0.7427299355126044		0.0596093	1.3236647381269515	0.9797692992332144		0.025980922093905106	0.14682722197337306	1		0.019057901071163157	-0.381326	1		0.020857130072090883	0.3016380071481368	1		0	-3.22941	1
4933426K07Rik	0.011498941813530486	3.3649402687627603	4.823621908121565e-08		0.00138881	-0.58645	0.9457605653410784		0.000988306	-1.09098	0.41783184773327414		0.000594095	-1.64372	0.45531488075083376		0.000915319	-0.787528	0.9741377997565358		0.00224941	0.7591663399655104	1		0.0092789	2.558091558150159	1		0	-2.07677	0.7424590069099763		0	2.365332682465527	1		0	0.42243742976845766	1
Oaz3	0.0500542	2.2392289124523597	5.162379506354782e-08		0.013292905055978126	-0.0781806	1		0.00911438	-0.750668	0.24091220402682956		0.00965404	-0.601973	0.9297405969646672		0.00518681	-1.42794	0.36951280089449084		0.021369375337182604	0.7125256148467223	1		0.016702021346081855	0.41863183743489873	1		0.0120366	-0.160829	1		0	-0.433409	1		0.00271228	-1.37342	1
Gm16153	0.19920225671086636	1.971336448180633	5.197836321027227e-08		0.0529732	-0.335177	0.9457605653410784		0.049195666706093454	-0.457945	0.5509203700075014		0.049458411536391834	-0.415575	1		0.037223	-0.80661	0.6643157160241636		0.1383385877091295	1.1882333991484133	0.9797692992332144		0.0705196	0.1992069962657097	1		0.042128	-0.592846	1		0	-2.61449	1		0	-4.55738	1
Usp46os1	0.046334	2.2084049295654955	5.365493033794076e-08		0.013987310543976984	0.1480649845262052	1		0.0074672	-0.981738	0.055194		0.00980257	-0.473871	1		0.00366128	-1.82091	0.12315719562531177		0.030367007058101594	1.31643	1		0.020413581645211155	0.7786906976635573	1		0.00401219	-1.59178	0.39023413313244004		0	-0.344326	1		0	-2.28722	1
Gm44686	0.7061703090191663	1.933572981590734	5.471985698045245e-08		0.19899677270367255	-0.262355	0.9458991491275269		0.1532972114323805	-0.720738	0.0800832		0.18580322171779637	-0.351791	1		0.16750346440222694	-0.478091	0.8996837657455533		0.5803472459992749	1.408927062491522	0.9797692992332144		0.14846241196517204	-0.609084	1		0.15446930341890136	-0.582466	1		0.0834285	-1.2957	1		0.00542455	-4.82461	1
Gm20616	0.2015696859077697	1.9704622663003448	5.5039505004364105e-08		0.0565444	-0.234569	0.9816378733691982		0.0421677	-0.750794	0.098299		0.0579243	-0.166515	1		0.04302	-0.605404	0.8083533206903916		0.14058799563935925	1.1939670940657843	0.9797692992332144		0.053817624337374866	-0.203003	1		0.031094470168739886	-1.05755	0.6491614224671937		0.010428565036045442	-1.63153	1		0.00271228	-3.57443	1
Olfr99	0.024688904481991927	2.5231131294480154	5.639899475050186e-08		0.00456324	-0.498624	0.940227		0.0074672	0.453729	0.7077195144565177		0.00148524	-2.11224	0.00326697		0	-4.44056	0.00350829		0.012371743616263612	1.2019488297272582	1		0	-1.72233	1		0.00351067	-0.621086	1		0.010428565036045442	1.7803701817443702	1		0	-1.16919	1
Gm37240	3.5907136833603874	1.9138750485491998	6.095119380161413e-08		1.0344657755502977	-0.239606	0.958742		0.8431346628780927	-0.601475	0.20278669289007845		0.8814885059113681	-0.486649	0.8667596903564327		0.7523926105936095	-0.686223	0.6643157160241636		2.7127859638570757	1.262375774794723	0.9797692992332144		1.0169675219614285	-0.203999	1		1.0025459010856619	-0.233701	1		0.33371408115345413	-1.78202	1		0.0542455	-4.3774	1
Gm19522	0.9151804866886322	1.9269675951943759	6.095119380161413e-08		0.24095870433560349	-0.397048	0.8014193121978944		0.2405975574844883	-0.387103	0.6271929929361663		0.2334793481537777	-0.410055	0.9936495120048627		0.2227277395512307	-0.444161	0.929343		0.7546763605920804	1.4083804672845586	0.9797692992332144		0.2022800363025469	-0.545744	1		0.12437788067495954	-1.29404	0.34730128054735304		0.052142825180227205	-2.26024	1		0.0189859	-3.78783	1
Gm16958	0.0172484	2.7746335472647683	6.549306503974931e-08		0.00416643	0.23631598229180018	1		0.0018668	-1.16052	0.1650696098155291		0.00118819	-1.70826	0.0896212		0.00122043	-1.40147	0.659081		0.012371743616263612	1.9226650722483907	0.9797692992332144		0	-1.04824	1		0.00100305	-1.38797	0.8003435618466181		0	1.4477948426575002	1		0	-0.4951	1
Gm9926	0.028409150362840023	2.377275863115038	6.549306503974931e-08		0.00595205	-0.39811	0.9457605653410784		0.00439247	-0.904623	0.17327075546403456		0.00534686	-0.520478	1		0.00366128	-0.972918	0.7246607669057875		0.0224941	1.7474370473834036	0.9797692992332144		0.00742312	0.3222273534818365	1		0.00501524	-0.453033	1		0	0.47456175222028474	1		0	-1.46833	1
Slc10a1	0.11093096808347057	2.022161298950385	6.731393995512395e-08		0.036009884591940745	0.10590581086717066	1		0.019985739599350467	-0.958846	0.023122964089244764		0.0233182	-0.647204	0.6841090554856336		0.016780857089476287	-1.075	0.49838419621627883		0.0944751	1.5454596464952854	0.9797692992332144		0.0445387	0.44228310549954397	1		0.018054853646365096	-0.923799	0.8217634938595464		0.0312857	0.2696426374233818	1		0.00271228	-2.67559	1
Gm16043	0.0571565	2.1684618482791302	6.940755049481305e-08		0.014780916815975677	-0.197704	1		0.012408728432563751	-0.506618	0.5849913548696675		0.0111393	-0.644275	0.8186600746467845		0.00579702	-1.51947	0.2523036724538411		0.0449882	1.5525144040292354	0.9797692992332144		0.012990461046952553	-0.153075	1		0.00902743	-0.823819	0.9634626581734613		0.010428565036045442	0.3282433637303068	1		0	-2.61709	1
Chst9	0.15658853116660632	2.0504	6.940755049481305e-08		0.0510884	0.14584689898495995	1		0.028441244814460278	-0.922044	0.0368027		0.033863416907799815	-0.578138	0.8637879050885454		0.0210523	-1.23535	0.3810069290674066		0.10572217272079815	1.2097843603029954	0.9862338045678373		0.042682943439986964	-0.101186	1		0.031094470168739886	-0.621304	1		0.010428565036045442	-1.20874	1		0.00271228	-3.15163	1
Gm35715	0.028409150362840023	2.441764589566752	7.181712641388736e-08		0.00436483	-0.8917	0.29058212858983096		0.00527096	-0.542016	0.6747689068581437		0.00608947	-0.254049	1		0.00335617	-1.04824	0.6909872379615134		0.011247	0.8029165427585374	1		0.016702021346081855	1.3953620581120516	1		0.00501524	-0.40741	1		0.010428565036045442	1.5240304284845854	1		0	-1.42445	1
Gm42917	0.3165591040430746	1.9423910180053021	7.355048697659191e-08		0.0744998	-0.588566	0.38923656503422255		0.0931204	-0.164925	0.9306287516486914		0.0848071	-0.312636	1		0.0732256	-0.50716	0.8788671267538328		0.18332674631372445	0.8878996540877133	1		0.11134680897387902	0.15497264902287222	1		0.0446356	-1.21831	0.45091696461022285		0.010428565036045442	-2.30316	1		0.00813683	-3.24527	1
Pln	0.0551273	2.1406970517383703	7.644113139860684e-08		0.0158721	-0.0152495	1		0.00988306	-0.861523	0.0993973		0.010545186844095557	-0.696942	0.6996906415349167		0.00549192	-1.56293	0.22096814115633992		0.049487	1.7319448712304863	0.9797692992332144		0.016702021346081855	0.20632823372203468	1		0.010531997960379638	-0.57153	1		0.010428565036045442	0.36033200140716026	1		0.00271228	-1.58256	1
Gm27206	0.0321294	2.3003629412056084	7.718586868382856e-08		0.00922567	0.13786921742031666	1		0.0056004	-0.76861	0.27030753031297344		0.00549538	-0.738779	0.7606848184909423		0.00396638	-1.10047	0.629271		0.012371743616263612	0.6500446175853982	1		0.014846241196517205	0.9564778168788397	1		0.00200609	-1.85637	0.3073538799906796		0	0.2452388369752212	1		0	-1.69766	1
Gm15738	0.17857180228070874	1.9703758431629623	7.859328305615846e-08		0.0514852	-0.181898	1		0.0418383	-0.552556	0.37450500062359643		0.0399529	-0.590085	0.7778615684462564		0.0338668	-0.78379	0.6779792057188531		0.11921862030217664	1.1290744637546952	1		0.076087	0.4679170532215635	1		0.0401219	-0.502155	1		0.010428565036045442	-1.45697	1		0.00271228	-3.39987	1
4921511C10Rik	0.3016781205196822	1.9346097210625801	7.895579999330783e-08		0.0855111	-0.250104	0.9671763181569302		0.0699501	-0.604043	0.2641696981324651		0.0778264	-0.38359	1		0.0674285	-0.565826	0.8408008641655522		0.19682319389510294	1.061612012867994	1		0.092789	-0.0428264	1		0.0702133	-0.483679	1		0.020857130072090883	-1.65416	1		0.00271228	-4.18242	1
Gm49484	0.077787	2.054563036546833	7.979856165934507e-08		0.0268834	0.2697085671131507	0.9457605653410784		0.0160325	-0.699479	0.21045030966612538		0.0160406	-0.649157	0.7272986640220548		0.00762766	-1.67031	0.10734676041878424		0.050611678430169324	1.1706239489685535	1		0.018557801495646505	-0.219027	1		0.00752286	-1.61592	0.25864059503231523		0.010428565036045442	-0.197758	1		0	-3.14235	1
Ccdc34os	0.025365312823964307	2.4368915298133365	8.150936539577848e-08		0.00664645	0.0857807	1		0.00417285	-0.750137	0.37450500062359643		0.00267343	-1.37172	0.0961188		0.00183064	-1.69183	0.3737840015871216		0.015745855511608235	1.4421931270209134	1		0.00185578	-0.812531	1		0.00601828	0.012239959638246312	1		0	0.6772766887802666	1		0	-1.26562	1
Gm13402	0.2019078900787559	1.9476982562376488	9.191489046106078e-08		0.061405285295898955	-0.100703	1		0.049634913730255005	-0.488009	0.48902511009285626		0.0438145	-0.660251	0.584323		0.0356975	-0.9088	0.5948590472476019		0.13384	1.099241781563133	1		0.0835101	0.4041705157293105	1		0.0416265	-0.648949	1		0.020857130072090883	-1.06527	1		0.00271228	-3.59375	1
Ccne2	0.1065343138606501	2.019181188661555	9.999113535158314e-08		0.0269826	-0.380231	0.9363565695599738		0.015593269357734979	-1.30504	0.000733862		0.017377279729002538	-1.05893	0.0720416		0.013119579179045097	-1.37944	0.24526152688261432		0.0686069	1.1206920544959669	1		0.031548262542599056	0.016850434858321606	1		0.10582150331619541	1.890343072022127	5.3532436853417056e-05		0.010428565036045442	-0.676631	1		0.0189859	-0.612209	1
Gm46348	0.0341586	2.6561642201496687	1.0037633844275187e-07		0.00823367	0.12033288150245092	1		0.00406303	-1.12434	0.1212671075085762		0.00401014	-1.06518	0.5429686479884763		0.00122043	-2.47602	0.15776662718816992		0.017995263441837984	1.3356672619384717	1		0.00556734	-0.0849031	1		0.00501524	-0.534871	1		0	0.39570633150904566	1		0	-1.54719	1
Gm20456	0.0649352	2.0704172533355805	1.0666103222493201e-07		0.0177569	-0.185166	1		0.017240445698340788	-0.232508	0.8747531371928232		0.012773043219608702	-0.711363	0.6281945374096052		0.00549192	-1.85734	0.0636137		0.0382399	1.0404524503555272	1		0.018557801495646505	0.0557064	1		0.014544187659571882	-0.402961	1		0	-0.928267	1		0	-2.87116	1
Gm47802	0.1721459230319711	1.9378101635381366	1.0923887368485345e-07		0.052874017871912996	-0.0913489	1		0.0360183	-0.779315	0.0786507		0.0429234	-0.43721	0.9936495120048627		0.0366128	-0.635122	0.787083		0.15858325908119722	1.5944758757585822	0.9797692992332144		0.027836702243469756	-0.914251	1		0.030091422743941824	-0.896456	0.8110443691842182		0.020857130072090883	-0.842676	1		0	-4.37198	1
Gm10550	0.15523571448266157	1.9671310424705117	1.165181402553776e-07		0.0455332	-0.151814	1		0.0342613	-0.660322	0.21497299764577882		0.033714893149432275	-0.641482	0.6766099643882859		0.030205542761057316	-0.745954	0.7249586716165736		0.11696921237194689	1.311236355794256	0.9797692992332144		0.053817624337374866	0.1762709998658547	1		0.0416265	-0.239036	1		0.020857130072090883	-0.671757	1		0	-4.20124	1
Platr31	0.056818300725680046	2.2014696178618802	1.1904685474147245e-07		0.011308889375981391	-0.650957	0.5438309335494375		0.012518540188604137	-0.451224	0.7025289254865669		0.0087629	-0.99366	0.2590825978978258		0.00976341	-0.730007	0.8021587754198776		0.0427388	1.5094042912247545	0.9797692992332144		0.022269361794775806	0.5924530410856388	1		0.020562472208360247	0.4140150152439501	1		0	-0.642162	1		0	-2.58506	1
Gm14858	0.33144	1.920852211923688	1.2161940216553607e-07		0.11517211022381048	0.13923558244989342	1		0.076978	-0.613749	0.23704415015008645		0.0739648	-0.638094	0.5938905380209026		0.0469864	-1.26552	0.2389155723263984		0.2114443454415963	1.0163241794626354	1		0.1280488303199609	0.2733046922684026	1		0.0606844	-0.851468	0.8358564053392293		0.0417143	-1.06242	1		0.00271228	-4.32836	1
Gm17359	0.0838746	2.046981916147601	1.2631134712611935e-07		0.0272802	0.13554263405300038	1		0.016801198674179237	-0.75568	0.15492670194606534		0.013367138253078874	-1.07083	0.083918		0.00793277	-1.73147	0.0861375		0.060734	1.323295337269501	0.9797692992332144		0.0296925	0.30331384909088044	1		0.029088375319143763	0.22091550222018697	1		0	-1.31337	1		0.00271228	-2.25469	1
Gm26636	0.021645066943116208	2.587089341015239	1.2705216649092432e-07		0.00386883	-0.503256	0.9457605653410784		0.00351398	-0.64862	0.6094587574328405		0.00401014	-0.374608	1		0.00122043	-1.85692	0.39822490834884694		0.00674822	0.6270260009826689	1		0.00742312	0.8613004556909329	1		0.00351067	-0.382573	1		0.010428565036045442	2.0116957278508263	1		0	-0.939019	1
Gm48765	0.5489053695105877	1.9045568473260444	1.2741178820248884e-07		0.16368129359973066	-0.182549	0.9873670243337859		0.13924130665921094	-0.472387	0.44940739903073706		0.1296612410548651	-0.558419	0.7845255714860798		0.10160046201446551	-0.879792	0.5922999539565695		0.4026440195111249	1.21272	0.9797692992332144		0.15031819211473668	-0.245733	1		0.13641444977253628	-0.412833	1		0.11471421539649986	-0.537991	1		0.013561385944242128	-3.48223	1
4930484I04Rik	0.3185883290689917	1.923310696589788	1.2741178820248884e-07		0.0911655	-0.243141	0.9613827140710668		0.0718169	-0.663828	0.1735253825696013		0.0794602	-0.450529	0.9936495120048627		0.0680387	-0.644788	0.7773676781404293		0.24743487232527225	1.3170141427786897	0.9797692992332144		0.059385	-0.766184	1		0.0937849	-0.140154	1		0.0417143	-1.00351	1		0.016273663133090553	-2.46021	1
Gm46124	0.0926679	2.055491113157088	1.3204177962810455e-07		0.031149046175948745	0.2126369858222894	0.983066		0.018448375014785044	-0.759261	0.15311611919082901		0.0209418	-0.498273	0.9936495120048627		0.0094583	-1.62005	0.1396117974066295		0.0438635	0.6961565424397103	1		0.031548262542599056	0.2476935549308923	1		0.0125381	-1.15623	0.6523400126635639		0.0312857	0.5536904020048246	1		0.00271228	-2.39206	1
BC028777	0.062906	2.1326337691435038	1.3390618715271064e-07		0.015276920735974862	-0.350757	0.9457605653410784		0.011420422628200266	-0.848086	0.11429917107714628		0.014852375836754306	-0.356962	1		0.0109838	-0.761872	0.7773676781404293		0.0281176	0.6865139605655441	1		0.0296925	0.7890591871446073	1		0.019057901071163157	0.0908498	1		0.0312857	1.1689354696620233	1		0	-2.7805	1
Gm15551	0.014204575181420011	2.78057	1.379546544793492e-07		0.00327363	0.14832217234057588	1		0.00142755	-1.25763	0.13229237553241588		0.00148524	-1.09118	0.6251111571676676		0.000305106	-2.47342	0.2619567005078478		0.00899763	1.772972139490542	1		0.00185578	0.2448023815366689	1		0.00150457	-0.675024	1		0	1.7279027618502356	1		0	-0.214992	1
4930579O11Rik	0.0135282	2.8638568463795453	1.4315057245317464e-07		0.00317443	0.25928707912111193	1		0.000988306	-1.66829	0.033181750367753865		0.00118819	-1.27811	0.47846698039251395		0	-3.3655	0.11914630983989456		0.010122335686033865	2.0708260993990466	0.9797692992332144		0.00556734	1.3953620581120516	1		0.000501524	-1.57927	0.8066514205749636		0	1.8487571567246208	1		0	-0.0941381	1
E530011L22Rik	0.16977849383506777	1.9169027397173815	1.6074238923153202e-07		0.0621989	0.24457559235175097	0.9465191340267941		0.0365673	-0.748021	0.10018122059916618		0.0396558	-0.564474	0.8138255703711375		0.014645111641724759	-1.98911	0.011624581182379027		0.0922257	0.7791693646131352	1		0.0408272	-0.3812	1		0.0516569	-0.0898073	1		0.0312857	-0.42257	1		0.010849108755393702	-2.04281	1
Gm46367	4.26171	1.8635252517622731	1.6219731515397514e-07		1.372938850557741	-0.0732254	1		0.8112892536263805	-1.00804	0.00353031		1.2869583662547606	-0.178068	1		1.0816025160398806	-0.431539	0.8810057435879535		3.5180740028793256	1.3579279901466306	0.9797692992332144		0.9668614579231829	-0.565899	1		0.8084562243872371	-0.853022	0.6597330582996821		0.27114269093718146	-2.35686	1		0.029835	-5.47011	1
Agrp	0.17079310634802633	1.9225798898211468	1.8185244995572733e-07		0.054262828847910706	-0.0401596	1		0.0397519	-0.607758	0.28009692389994056		0.0423293	-0.460621	0.9936495120048627		0.030510649253593248	-0.911057	0.6029895210125121		0.0955998	0.8281304525453073	1		0.059385	0.14256476090464876	1		0.0361097	-0.628407	1		0.073	0.5759801781873364	1		0.00542455	-2.78557	1
BC048559	0.044642950570177184	2.2956932172896165	1.888299320380293e-07		0.012697700351979105	0.1137724893204144	1		0.00680833	-1.00138	0.0830918		0.00757471	-0.762705	0.7778615684462564		0.00305106	-1.95089	0.16104437693179177		0.023618783267412354	1.0694315173272928	1		0.00742312	-0.390398	1		0.013039616522374791	0.1720904242435335	1		0	-0.229614	1		0	-2.17251	1
Btg4	0.0453194	2.1341356076101112	1.9834679883854192e-07		0.013590507407977636	0.0595366	1		0.00944381	-0.607393	0.43483687725482506		0.010396663085728014	-0.400861	1		0.00427149	-1.63009	0.222162		0.019119967406952855	0.624789	1		0.011134680897387903	-0.0360699	1		0.00651981	-0.960572	0.871099		0	-0.365609	1		0	-2.3085	1
Gm15356	0.0493778	2.0722323127903906	1.9892902038759446e-07		0.017360137199971433	0.32422581082143154	0.9457605653410784		0.010322305067796394	-0.656934	0.31181751310584876		0.00965404	-0.716431	0.6521743358428317		0.00335617	-2.13296	0.030109507806298147		0.0337411	1.271841229572856	0.9949994741823867		0.00556734	-1.02148	1		0.00551676	-1.3608	0.484762		0.010428565036045442	0.4691684934500664	1		0	-2.47642	1
Gpr68	0.10315227215078819	1.9844162854299436	1.9892902038759446e-07		0.0338275	0.0872643	1		0.027343127254056406	-0.3169	0.7827506497231329		0.019011041071045513	-0.892095	0.23080836787479236		0.010678727238757638	-1.65756	0.0964354		0.0404893	0.3657352968760419	1		0.050106064038245565	0.6879634817299012	1		0.020562472208360247	-0.655352	1		0.0312857	0.34666883820049055	1		0.010849108755393702	-1.27306	1
Gm35166	0.0453194	2.138335596139397	2.0817901184493428e-07		0.011110487807981717	-0.326934	0.9518771768975589		0.00999287	-0.504522	0.6185765789658979		0.00920847	-0.59787	0.9245522874888927		0.00427149	-1.62698	0.22405		0.0224941	0.859754	1		0.020413581645211155	0.7599946039536523	1		0.015045711371970912	0.24322524422537128	1		0.010428565036045442	0.6404399205998956	1		0.00271228	-1.30246	1
Lhx8	0.00710229	3.8555535426483374	2.222323535470106e-07		0.000694405	-0.589556	0.9714914260680805		0.000439247	-1.20116	0.5770618398770102		0.000148524	-2.08764	0.5041577896945192		0	-1.92693	0.7345502996849792		0.00449882	2.5379521098263433	1		0	0.791291	1		0	-1.15477	1		0	3.287330170464254	1		0	1.3444349177671846	1
Gm10113	0.033482212927632884	2.2509240084711033	2.2441190389205225e-07		0.011110487807981717	0.39040317533242064	0.9455071295329556		0.00417285	-1.35968	0.00676412		0.00579243	-0.760826	0.731973		0.0048817	-0.904424	0.7413701148127736		0.019119967406952855	1.165072827492227	1		0.0092789	0.2622369748726907	1		0.00351067	-1.25999	0.6955085979185677		0	0.15155339143378654	1		0	-1.79134	1
4930557K07Rik	0.5455233278007257	1.8694222880916476	2.3301330881631496e-07		0.16963334063972085	-0.136719	1		0.14330434163270525	-0.442514	0.5091929904577488		0.11807638790219672	-0.73316	0.355378		0.0784124	-1.28823	0.20273804265613113		0.37002760452279354	1.0659509485923313	1		0.17815489435820644	-0.0177406	1		0.21966738603077532	0.2928643931963677	1		0.0834285	-0.971215	1		0.00542455	-4.50039	1
Gm17218	0.00946972	3.3873694500020743	2.332657822532789e-07		0.00109121	-0.63536	0.9498935544257268		0.000878494	-0.938127	0.6019801911198117		0.000297048	-2.12611	0.23577666447337464		0.000305106	-1.53698	0.7399819047822166		0.00674822	2.3829213236837257	0.9797692992332144		0	0.1565751985249335	1		0.00100305	-0.154768	1		0	2.652614634545997	1		0	0.7097193818489291	1
Ggact	0.7612975888899154	1.8677771189060925	2.4457226664156974e-07		0.23818108238360808	-0.126439	1		0.19645323155625266	-0.476157	0.44235195057887067		0.18966483943535248	-0.501758	0.8504970107305264		0.15865537611868488	-0.729511	0.6909872379615134		0.4442580662203752	0.8364577418162797	1		0.24310719959296923	-0.0556192	1		0.1715211096404684	-0.589865	1		0.21899986575695427	-0.162026	1		0.0678069	-1.86328	1
4933400F21Rik	0.029761967046784788	2.2868928542562807	2.5462828130031925e-07		0.00664645	-0.361678	0.9516120589401545		0.00527096	-0.751654	0.3196916667456704		0.00534686	-0.668729	0.9142891894373101		0.00335617	-1.22847	0.5824199520736628		0.019119967406952855	1.370124049219612	1		0.0092789	0.45927382193224453	1		0.00952895	0.3223309089893238	1		0	0.34543312502782175	1		0	-1.59746	1
Gm15774	0.0598621	2.0374772591532864	2.5808673022671504e-07		0.020237	0.20491639067584178	0.9873670243337859		0.012298916676523363	-0.718736	0.21670539479650547		0.012624519461241159	-0.624345	0.8138255703711375		0.00854298	-1.12936	0.5105936683559379		0.0382399	1.13815	1		0.024125141944340456	0.5044985019452417	1		0.00250762	-2.68163	0.019032908327664178		0.0312857	1.1711230288997871	1		0	-2.77832	1
Gm49189	0.13866371010433823	1.9068360852522792	2.718164340322762e-07		0.0465252	0.052568180124991315	1		0.034810326664802736	-0.487973	0.5001110822769349		0.0276254	-0.833125	0.2530481032798123		0.025323838880482397	-0.887529	0.6205444302413277		0.0731058	0.730414	1		0.038971383140857664	-0.158669	1		0.0416265	-0.115365	1		0.010428565036045442	-1.13982	1		0	-4.08359	1
2410021H03Rik	0.018939433575226684	2.68712	2.7190927811280735e-07		0.00257922	-0.8917	0.5502478820150541		0.00483172	0.2618105737727685	0.9004039569046262		0.00118819	-1.90793	0.04322		0.000305106	-2.94579	0.12555277813567717		0.014621151546493362	1.961094658742243	0.9797692992332144		0.00371156	0.3667929059152808	1		0.00150457	-1.15477	0.9590040493277096		0	1.2591332786336018	1		0.00271228	0.32557589051586966	1
Gm15489	0.4102416594062494	1.8707678716623204	2.7269185705087974e-07		0.13461546388777848	-0.0293963	1		0.10036794502091388	-0.568105	0.2736432209220155		0.10262991703197225	-0.491701	0.9297405969646672		0.077497	-0.874475	0.5985063877395811		0.22719020095320452	0.7630295239773401	1		0.18557801495646506	0.4608175304228195	1		0.0942865	-0.55466	1		0.052142825180227205	-1.14452	1		0.00271228	-4.67355	1
4930488N15Rik	0.037540662979467176	2.177197521269794	2.749116224670119e-07		0.011408090159981227	0.1298639334750593	1		0.0056004	-1.13179	0.025898633350952178		0.00980257	-0.14301	1		0.00396638	-1.4224	0.41137183203731836		0.024743487232527225	1.311348973962291	1		0.00742312	-0.223816	1		0.00200609	-2.16987	0.1423974019168402		0.010428565036045442	0.9390679277634284	1		0	-2.00755	1
Degs2	0.33516033344731505	1.8703002745052093	2.7941784330637966e-07		0.10525203182382681	-0.116608	1		0.0881788	-0.438763	0.5635714041659898		0.0809454	-0.550711	0.8067197337015604		0.0591907	-0.975555	0.5120013640337867		0.18557615424395418	0.7637674485943879	1		0.12990461046952553	0.23913865663234724	1		0.0887697	-0.341375	1		0.10428565036045441	0.023145748594364246	1		0.0244105	-2.05761	1
Gm14092	0.022321475285088592	2.4101226033203567	2.820261267931705e-07		0.00674565	0.3542234633220005	0.9465191340267941		0.00252567	-1.37423	0.018796549152692067		0.00282195	-1.11084	0.3452085471316329		0.00183064	-1.5227	0.4939702383590294		0.013496447581378487	1.3965962605808029	1		0.00371156	-0.0552994	1		0.00501524	-0.0694602	1		0	0.8417707264085141	1		0	-1.10112	1
Gm15591	0.061215	2.031377473391994	2.875573843271599e-07		0.0161697	-0.289035	0.9613827140710668		0.0120793	-0.793496	0.13453229646286674		0.015297947111856934	-0.347668	1		0.010678727238757638	-0.839996	0.6909872379615134		0.0449882	1.34137	0.9797692992332144		0.020413581645211155	0.24047645613388013	1		0.017553329933966064	-0.0678319	1		0	-0.87201	1		0	-2.81491	1
4930533B01Rik	0.0899623	1.9896918452712953	2.9283565916114516e-07		0.019344152879968168	-0.705399	0.28369566521029366		0.0238292	-0.313101	0.7949512856599379		0.018119898520840252	-0.743023	0.529389		0.010678727238757638	-1.45013	0.22580715586829408		0.0686069	1.3553080520901712	0.9797692992332144		0.020413581645211155	-0.351667	1		0.0541646	1.0316215447126815	0.18800415790096303		0.010428565036045442	-0.454846	1		0.00271228	-2.39774	1
4930473H19Rik	0.028747354533826215	2.3099366777763484	2.9605574217547784e-07		0.00783686	0.042712	1		0.00494153	-0.782429	0.31187838628880804		0.00460424	-0.832379	0.6918516764182646		0.00183064	-1.96441	0.195512		0.015745855511608235	1.160528902347278	1		0.016702021346081855	1.2843307457233077	1		0.00451371	-0.661728	1		0	0.4111363720786514	1		0	-1.53176	1
4930439A04Rik	0.00744049	3.6148292985396306	2.993544400211707e-07		0.000793606	-0.594718	0.9816378733691982		0.000549059	-1.09859	0.5530088015854807		0.000297048	-1.65077	0.6230091737365168		0.000305106	-1.07132	0.9256734744905278		0.00224941	1.5308973522923939	1		0	0.6129534931846781	1		0.00100305	0.3205704511248868	1		0	3.1089929292057414	1		0	1.166097676508672	1
Gm4117	0.21171581103735543	1.9032315177928112	3.0307204051345916e-07		0.0672581	-0.060191	1		0.058859101237647524	-0.307162	0.7802918023681238		0.0497555	-0.566683	0.8297658267590756		0.028069797313305788	-1.37406	0.2018778138335538		0.15633385115096748	1.2269766237371305	0.9797692992332144		0.061240744935633466	-0.142446	1		0.026079233044749583	-1.4369	0.311838		0.0834285	0.42151551785865093	1		0.00271228	-3.69535	1
Gm15283	0.9638818873106437	1.846606729008361	3.0926096850030517e-07		0.22597938595162814	-0.685593	0.1507732741321364		0.3092299050097303	-0.0954345	0.9935205533453533		0.17614917742390607	-1.02743	0.026399		0.13394175022327437	-1.35887	0.14583052793586182		0.7108129059526003	1.173227395862993	0.9797692992332144		0.18186645465733575	-0.835623	1		0.6890935808362678	1.1820087769314025	0.051212655129928356		0.073	-1.9802	1		0.097642	-1.71006	1
Gm16549	0.0402463	2.1425478474263118	3.3750182983920786e-07		0.012598499567979269	0.15518671363838887	1		0.009334	-0.410241	0.7606309347013858		0.00668357	-0.916863	0.3733236368362519		0.00274596	-2.05056	0.0791884		0.019119967406952855	0.8080759404464581	1		0.0092789	-0.0831784	1		0.00702133	-0.675906	1		0.010428565036045442	0.8141584952006538	1		0	-2.13215	1
Gm47071	0.15625032699562014	1.8882729013568613	3.4467107496954293e-07		0.05089	-0.0263402	1		0.0389832	-0.516399	0.445313		0.035645702008210337	-0.627962	0.6839734865588634		0.026849371343162058	-0.995247	0.5360098660008068		0.0933504	0.8997646701383113	1		0.0853659	0.7680532666813007	1		0.0341036	-0.606475	1		0.020857130072090883	-0.740091	1		0.00813683	-2.26717	1
Gm11476	0.3229849832918122	1.8618700419872969	3.5305936775933597e-07		0.10783125220782257	-0.00425149	1		0.076429	-0.634919	0.2045430423010399		0.0852526	-0.409035	0.9940290451515021		0.054614062163931915	-1.04746	0.44779832891055094		0.21819256923228553	1.0563383357673017	1		0.1614528730121246	0.6030745841433891	1		0.0601828	-0.871002	0.8095310232856315		0.0312857	-1.39178	1		0.00271228	-4.33542	1
Ube4bos1	0.16166159373139918	1.885629426095262	3.541338455452605e-07		0.045235557503925564	-0.322872	0.9457605653410784		0.0368968	-0.675646	0.18379937430621338		0.0464879	-0.24088	1		0.0482068	-0.155655	1		0.10009865289522378	0.9506341881070584	1		0.046394503739116265	-0.154402	1		0.0351067	-0.616628	1		0.020857130072090883	-0.791172	1		0	-4.32053	1
Gm12542	0.0213069	2.396121924011039	3.5740007792542894e-07		0.00515844	-0.107112	1		0.00329435	-0.88231	0.25255206490679927		0.00415867	-0.438054	1		0.000610213	-2.71609	0.0612198		0.010122335686033865	1.0555593427457355	1		0.00371156	0.00212893	1		0.00551676	0.12353360406533298	1		0.010428565036045442	1.905901063828229	1		0	-1.04426	1
Gm5600	0.028070946191853834	2.360202349756096	3.662415998937821e-07		0.00575365	-0.453157	0.9457605653410784		0.00384341	-1.11745	0.0668053		0.0056439	-0.42567	1		0.00427149	-0.749393	0.8444939069130702		0.015745855511608235	1.2330975282979235	1		0.022269361794775806	1.7509732792557022	1		0.00250762	-1.34978	0.7424590069099763		0.0625714	3.3202447929369883	1		0	-1.46292	1
Mir133a-1hg	0.26988692844698026	1.8437064312339122	3.7354132744725155e-07		0.0797574	-0.260964	0.9581313316594731		0.0661067	-0.590856	0.2781888871721656		0.0741134	-0.35793	1		0.059495766044506834	-0.659085	0.7694975376358313		0.23168901681366402	1.4073226671738612	0.9797692992332144		0.0630965	-0.499497	1		0.0712164	-0.366272	1		0.052142825180227205	-0.560579	1		0.00542455	-3.50479	1
Gm17227	0.3923168383439813	1.8505551379366645	3.770008319358789e-07		0.12965542468778665	-0.0362655	1		0.1044309799944082	-0.436384	0.5266035152691355		0.0940155	-0.581071	0.731973		0.0677336	-1.02626	0.46080708495831857		0.25980661594153587	1.0161725163832958	1		0.1391835112173488	0.0930045	1		0.084256	-0.671182	0.9993914771484494		0.0938571	-0.357133	1		0.010849108755393702	-3.30155	1
Gm20404	0.315544	1.8575083834761337	3.943123579146652e-07		0.10624403966382517	0.00813884	1		0.0806018	-0.503677	0.4326653972543534		0.0770838	-0.542753	0.8297631418187106		0.0445455	-1.3209	0.19780809354216206		0.21819256923228553	1.088246338988764	1		0.0668081	-0.635499	1		0.0877666	-0.277527	1		0.052142825180227205	-0.775734	1		0.00542455	-3.71976	1
Recql5os1	0.020292250259171446	2.5195043395163204	4.0355875060525926e-07		0.00396803	-0.396749	0.95824		0.0018668	-1.60555	0.010973755857011741		0.00326752	-0.649241	0.9936495120048627		0.00366128	-0.362268	1		0.014621151546493362	1.7358023469000008	0.9797692992332144		0.011134680897387903	1.411944942307655	1		0.00401219	-0.154768	1		0	1.051441906643583	1		0	-0.891453	1
Gm17477	0.1065343138606501	1.9108485668734816	4.2557995459506237e-07		0.0312482	-0.208096	0.9873670243337859		0.020095551355390852	-0.978154	0.017462580542962337		0.0305959	-0.219494	1		0.026849371343162058	-0.391859	0.9949523063183351		0.0933504	1.5010474245458338	0.9797692992332144		0.038971383140857664	0.2295231873746557	1		0.021063995920759276	-0.724939	0.9887966633525256		0	-1.75821	1		0.00271228	-2.69996	1
Masp2	0.0530981	2.0092883839031233	4.3019166601594224e-07		0.018748948175969147	0.2656107033320403	0.9556545557874969		0.00966343	-0.948578	0.0460552		0.012030424427770987	-0.529059	0.9760962066115878		0.00854298	-0.97077	0.6215896928591103		0.023618783267412354	0.5955003289948806	1		0.020413581645211155	0.43188793413716553	1		0.00952895	-0.757339	0.9993914771484494		0	-0.683911	1		0.00271228	-1.62438	1
2010009K17Rik	0.0473486	2.1153414774614756	4.3140875201639305e-07		0.014582515247976003	0.0943132	1		0.010432116823836782	-0.526621	0.5888205685349177		0.00787176	-0.940279	0.3331506176140875		0.00579702	-1.27892	0.47989129010102616		0.0337411	1.3689399176779373	0.9862338045678373		0.016702021346081855	0.4098616278071665	1		0.00351067	-1.86394	0.23642153334332813		0.0312857	1.5665908907126305	1		0	-2.38492	1
Nckap5los	0.18364486484550158	1.8602411728123665	4.3564463576897747e-07		0.0591237	-0.0782201	1		0.0424971	-0.674918	0.174252		0.056439	-0.149241	1		0.034477	-0.886404	0.6152125221969229		0.12034332426729151	1.0139802389943364	1		0.0797985	0.4111870252737342	1		0.0215655	-1.53487	0.22007152769030677		0.0625714	0.23082487016443176	1		0	-4.52333	1
Slc18a2	0.10450508883473295	1.911086230106278	4.832239438589118e-07		0.0394819	0.30271233012413745	0.9457605653410784		0.019985739599350467	-0.954726	0.023611354020261526		0.0277739	-0.3515	1		0.013119579179045097	-1.43389	0.19780809354216206		0.0618587	0.9111694334105604	1		0.020413581645211155	-0.628485	1		0.0215655	-0.661728	1		0.010428565036045442	-0.729185	1		0.00271228	-2.67208	1
Gm45435	0.27631280769571787	1.8280649763435075	5.037984897965024e-07		0.074103	-0.458608	0.7247504834803181		0.0642399	-0.696711	0.13318075457066572		0.081391	-0.25224	1		0.0832941	-0.188764	1		0.2575572080113061	1.520987122817993	0.9797692992332144		0.0630965	-0.545744	1		0.0782377	-0.273107	1		0.010428565036045442	-2.19309	1		0.00813683	-3.13513	1
Gm16183	0.0574947	2.087656088930239	5.037984897965024e-07		0.00872967	-1.21491	0.00684991		0.018448375014785044	0.14507381766019645	0.9306287516486914		0.00549538	-1.81761	0.000572046		0.00579702	-1.5883	0.24030919086589106		0.0314917	0.9520144856879433	1		0.012990461046952553	-0.220525	1		0.050653894952302075	1.7459945686354281	0.0016534		0.010428565036045442	0.2614620846935747	1		0	-2.68376	1
Baiap2l1	0.31182424564926786	1.8444253621880526	5.048410637595089e-07		0.0882887	-0.341394	0.9455071295329556		0.0888377	-0.318813	0.7636256610071896		0.081391	-0.4433	0.9936495120048627		0.0665132	-0.709558	0.7249586716165736		0.17995263441837983	0.8058705238483213	1		0.10949102882431438	0.078058	1		0.0907758	-0.219224	1		0.0417143	-1.03194	1		0.013561385944242128	-2.71142	1
Gm17058	0.0784634	1.9597536245705234	5.160716953346792e-07		0.026189006975956906	0.097076	1		0.017240445698340788	-0.672943	0.24775083243857285		0.017822851004105168	-0.570344	0.8803126647800086		0.011288940223829503	-1.18763	0.4403913560613828		0.0404893	0.7547170070915463	1		0.020413581645211155	-0.175101	1		0.0215655	-0.193923	1		0.010428565036045442	-0.280126	1		0	-3.22462	1
2610020C07Rik	1.4065911471315673	1.8108330586146102	5.216976805031779e-07		0.46723569263923115	-0.0674457	1		0.31274388120302266	-0.790496	0.0411324		0.39507319725766454	-0.35003	1		0.3362273547745976	-0.56614	0.7773676781404293		1.1123322214986102	1.250463309612701	0.9797692992332144		0.4435314557459515	-0.122585	1		0.3440452667057349	-0.513341	1		0.19814273568486337	-1.22986	1		0.0244105	-4.17359	1
Pp2d1	0.0263799	2.2327766617608447	5.397465845936555e-07		0.00863047	0.3402559206403799	0.9457605653410784		0.00428266	-0.940247	0.13453229646286674		0.00341605	-1.21803	0.14824447303912838		0.00244085	-1.52031	0.41137183203731836		0.017995263441837984	1.4251654127775737	1		0.00742312	0.32772334123668845	1		0.00451371	-0.590536	1		0	0.4799752484066495	1		0.00271228	-0.457486	1
Gm17196	0.015557391865364775	2.680621612320933	5.586535426669198e-07		0.00386883	0.21083474318830486	1		0.000439247	-3.06789	2.2645296811365922e-05		0.00267343	-0.411615	1		0.00213575	-0.597867	0.979334		0.010122335686033865	1.7305971877687396	1		0.00371156	0.6469008251080153	1		0.000501524	-1.89552	0.5823275462393117		0	1.5352576839078393	1		0.00271228	0.6036777444386043	1
Gpr161	0.012513554326489058	2.7542323552050467	5.60409546347125e-07		0.00267842	-0.0178296	1		0.00153736	-0.955001	0.3832461880156678		0.00163376	-0.768953	0.9936495120048627		0.000305106	-2.30836	0.36335357598862156		0.00787293	1.7643280450812888	1		0	-0.604638	1		0.00100305	-0.936587	1		0	1.891401494133114	1		0	-0.0514938	1
D730045B01Rik	0.2671812950790907	1.821676074045838	5.82890845181904e-07		0.0918599	0.012221617158255427	1		0.0607259	-0.741845	0.0938743		0.0757471	-0.323428	1		0.0588856	-0.677144	0.7542827676587697		0.20019730579044756	1.1822861855422135	0.9797692992332144		0.0983563	0.13232765227825727	1		0.042629515553917585	-1.12803	0.5338069502438965		0.0312857	-1.14861	1		0.00271228	-4.09239	1
Mroh5	0.0696701	1.970057402583171	5.85174600232104e-07		0.022220975615963433	0.0160299	1		0.0136167	-0.864305	0.0743995		0.0160406	-0.538358	0.9625550539275545		0.0186115	-0.248369	1		0.0337411	0.6746003990732632	1		0.033404	0.6816662432686922	1		0.011033521672778669	-0.981331	0.7969387946312493		0.020857130072090883	0.48540913445727707	1		0.00271228	-2.04426	1
Gm14798	0.5806965615832895	1.8167356051888723	5.891548774264364e-07		0.18719187940769197	-0.120405	1		0.15626212884547094	-0.448989	0.492353		0.1418401892410036	-0.579319	0.651857		0.13516217619341808	-0.600764	0.7920017539266383		0.39477109175532077	1.0271509275599813	1		0.16516443331125388	-0.259073	1		0.148451	-0.439875	1		0.0625714	-1.46434	1		0.010849108755393702	-3.89306	1
Gm48065	0.038217071321439554	2.082855102666418	6.559185623185455e-07		0.010316881535983024	-0.197239	1		0.00867513	-0.501716	0.6191031959031303		0.00831733	-0.529108	0.9936495120048627		0.00732256	-0.642478	0.8540348168668479		0.021369375337182604	0.9997061080122185	1		0.014846241196517205	0.5438073321439116	1		0.00401219	-1.40225	0.5229047429473649		0	-0.158229	1		0.00542455	-0.509176	1
Gm26981	0.219833	1.8181724321202064	6.665148559781786e-07		0.0757894	0.013957954238327464	1		0.049305478462133845	-0.767778	0.0760373		0.0632711	-0.300592	1		0.043325121940102414	-0.848368	0.629271		0.16308207494165672	1.165758770988098	0.9797692992332144		0.0668081	-0.138807	1		0.0491493	-0.631182	1		0.020857130072090883	-1.28545	1		0.00542455	-3.22835	1
Gm15091	0.021645066943116208	2.4725295767523825	7.054645974663261e-07		0.00476164	-0.220322	1		0.00340416	-0.793179	0.4178610184090099		0.00267343	-1.09786	0.46598277616084666		0.00305106	-0.750954	0.8849761394455778		0.0168706	1.811633759859646	0.9797692992332144		0.0092789	1.0543251402769842	1		0.00150457	-1.4918	0.7615957923473403		0	0.927927	1		0	-1.01497	1
Mypop	0.13359064753954536	1.8484987851143861	7.086111023240218e-07		0.048905986511919526	0.1683490680201345	0.9873670243337859		0.029429550618823762	-0.770369	0.090559		0.035794225766577877	-0.393947	1		0.0231881	-1.00934	0.5224980330117613		0.0832281	0.933323	1		0.050106064038245565	0.204521	1		0.0235716	-0.945759	0.7666283360875786		0.0312857	-0.1283	1		0	-4.07386	1
Gm43915	0.0598621	2.0197389819130835	7.127051511944832e-07		0.0221218	0.37433347547118334	0.9043515716770808		0.00955362	-1.15859	0.0096326		0.011733376911035901	-0.758378	0.5831809451772608		0.00549192	-1.77537	0.10974979596277644		0.041614046709250334	1.2499181746503583	1		0.033404	0.9428498534145442	1		0.0120366	-0.593901	1		0.0417143	1.4821463474482766	1		0	-2.79134	1
Tbc1d22bos	0.044642950570177184	2.0390213136793625	7.420780786142822e-07		0.012102495647980086	-0.232004	0.9873670243337859		0.011420422628200266	-0.328711	0.7940003728921677		0.00846585	-0.791691	0.5451236130456278		0.0048817	-1.49241	0.2736206554531293		0.029242303092986723	1.188009638769386	1		0.011134680897387903	-0.0841642	1		0.014544187659571882	0.1389636446349396	1		0.010428565036045442	0.5898138475299275	1		0	-2.356	1
Epo	0.058171117409624815	1.9582110608300223	7.615317380812267e-07		0.019046550527968657	0.0562303	1		0.013946093017129171	-0.520435	0.5119099699735925		0.012624519461241159	-0.644211	0.7778615684462564		0.00915319	-1.04674	0.5728322578205521		0.024743487232527225	0.48719880936170945	1		0.027836702243469756	0.6838671514619632	1		0.0120366	-0.598374	1		0.020857130072090883	0.7365158921549426	1		0	-2.79565	1
Gm49227	0.011498941813530486	2.8579802800428755	7.634975327770461e-07		0.00208322	-0.242017	1		0.00120793	-1.11745	0.3103231493032222		0.00163376	-0.560007	1		0.000305106	-2.12195	0.47851670014032327		0.00787293	1.9636368533046955	0.9923070469855888		0.00185578	0.5962747520380471	1		0.000501524	-1.34978	0.9380448426200662		0	2.075826065270541	1		0	0.1329308125734734	1
Gm16876	0.0358496	2.1535893891059006	7.66487816484796e-07		0.010812885455982206	0.0907174	1		0.00527096	-1.17406	0.023122964089244764		0.00683209	-0.685537	0.865023		0.0048817	-1.07938	0.6322294698592195		0.021369375337182604	1.1496815201102857	1		0.020413581645211155	1.1163861084092357	1		0.00952895	-0.0606454	1		0	-0.0154891	1		0	-1.95838	1
Gm17036	0.2046135234466454	1.8183661279605792	7.944980598658817e-07		0.0670597	-0.0864371	1		0.0416187	-0.934549	0.017583607783988618		0.060597693413957564	-0.251393	1		0.0442404	-0.707137	0.7359506048611842		0.17207970666257572	1.3571691772423158	0.9797692992332144		0.0779428	0.18645286613922574	1		0.0561707	-0.324469	1		0.052142825180227205	-0.180132	1		0.00271228	-3.71028	1
Tulp2	0.19886405253988018	1.821522444437559	8.387854454567667e-07		0.0621989	-0.17442	1		0.0552353	-0.386865	0.6859762206106859		0.0519833	-0.460402	0.9936495120048627		0.0323413	-1.13352	0.39227255436640396		0.12821625202309564	0.9579176926020403	1		0.10392368837562042	0.645696	1		0.0516569	-0.404231	1		0.0417143	-0.400202	1		0	-4.66738	1
Gcnt7	0.3855527549242575	1.805196791565838	8.952998088331261e-07		0.11596571649580918	-0.266036	0.9457605653410784		0.10212493311756007	-0.488122	0.41851224398754977		0.10738267729973362	-0.368795	1		0.0951932	-0.518268	0.8666028067048616		0.2834253992089482	1.138003848705354	0.9819617454520244		0.14475085166604273	0.14026295281371182	1		0.0882682	-0.611662	1		0.10428565036045441	-0.228709	1		0.00271228	-4.63375	1
4930422M22Rik	0.0263799	2.3611007587363835	8.971086725730981e-07		0.00684485	-0.00592279	1		0.00450228	-0.750668	0.4147284276977749		0.00445571	-0.705346	0.9643727844283247		0.00305106	-1.12646	0.6712672550328405		0.015745855511608235	1.3277344024359978	1		0.00185578	-0.920784	1		0.00300914	-1.03022	0.9531470642167186		0	0.5694733992457524	1		0	-1.37342	1
Bcas3os1	0.21273	1.8112492296978848	8.971086725730981e-07		0.0708294	-0.0627035	1		0.0553451	-0.514155	0.4300924954487985		0.0555479	-0.471457	0.9797460604044397		0.0500375	-0.584728	0.8247417054794046		0.1597079630463121	1.1785340927430874	0.9797692992332144		0.0723754	0.0179606	1		0.0341036	-1.12531	0.5497491762507125		0.020857130072090883	-1.24337	1		0	-4.77232	1
Smyd1	0.27969484940557976	1.7858281333332613	9.222246928438753e-07		0.10802965377582223	0.21157851545867734	0.9755852543595283		0.0684127	-0.647078	0.18884648870940732		0.0736678	-0.479979	0.9651261344094114		0.0454609	-1.16615	0.3297503511375222		0.19119967406952856	1.0144117314578156	1		0.050106064038245565	-0.920784	1		0.064195	-0.620553	1		0.020857130072090883	-1.65745	1		0.00271228	-4.18571	1
Gm50301	0.014880983523392394	2.635587858706428	9.307420283174832e-07		0.00386883	0.2603034194526037	1		0.000988306	-1.97168	0.00459506		0.00222786	-0.659542	1		0.00122043	-1.27594	0.6900198039963248		0.00337411	0.3727495186264349	1		0.014846241196517205	2.3387785297456842	1		0.000501524	-1.86104	0.6545319837515351		0.010428565036045442	2.5810613735209644	1		0	-0.373422	1
Gm16035	0.00710229	3.621088289011313	9.699551296253085e-07		0.00109121	0.042712	1		0.000549059	-1.02059	0.6311843659719328		0.000148524	-2.20011	0.34703779729501744		0	-2.03656	0.6712672550328405		0.00224941	1.603047138048229	1		0	0.6816662432686922	1		0	-1.26439	1		0	3.1777056792897556	1		0	1.234810426592686	1
Slc6a20b	0.0541127	2.0071467213183913	9.971165586493518e-07		0.0158721	-0.111798	1		0.012957787212765687	-0.477447	0.6412834716721071		0.012030424427770987	-0.56229	0.9700512542986798		0.00701745	-1.28633	0.4267745083375262		0.0472376	1.5850933680595363	0.9797692992332144		0.00742312	-0.877258	1		0.00802438	-1.02883	0.8136386503055334		0.010428565036045442	0.28970497765215697	1		0.00542455	-1.06585	1
Ccdc27	0.011837145984516677	3.038799922588482	1.0152239034738248e-06		0.00208322	-0.153208	1		0.000658871	-1.91367	0.0360657		0.00103967	-1.14497	0.8138255703711375		0	-3.07132	0.2943395877976454		0.00562352	1.5846686087333737	1		0.012990461046952553	2.772431707191875	1		0.000501524	-1.28188	1		0.010428565036045442	3.160218252560914	1		0	0.200045	1
4930478M13Rik	0.12378272658094581	1.8408296893476859	1.0152239034738248e-06		0.038489904191936666	-0.16616	1		0.0272333	-0.779405	0.0858461		0.0354972	-0.285309	1		0.031426	-0.43902	0.9519244537684883		0.10009865289522378	1.3206200059925135	0.9797692992332144		0.0668081	0.7211946074553297	1		0.0200609	-1.07285	0.6558468115842738		0.010428565036045442	-1.02603	1		0.00271228	-2.96893	1
Gm17133	0.016233800207337157	2.606441513046911	1.0499284917422884e-06		0.00367043	-0.0456439	1		0.00263548	-0.62466	0.7017892991881844		0.00133671	-1.56748	0.16782966315547357		0.00152553	-1.14932	0.7446293967547863		0.00899763	1.4510440446031803	1		0	-1.06931	1		0.00200609	-0.651001	1		0	1.4267332271296693	1		0.00542455	1.0898620906815868	1
Gm43660	0.0564801	1.9780567320346272	1.0560928120853067e-06		0.017062534847971923	-0.0833747	1		0.011530234384240654	-0.781848	0.15842531737230797		0.014406804561651677	-0.35887	1		0.012509366193973233	-0.522701	0.9175437450536178		0.039364638779020585	1.2231134397253012	1		0.014846241196517205	-0.10374	1		0.00802438	-1.114	0.7253048454393418		0.010428565036045442	0.2065827565798921	1		0.00271228	-1.73631	1
Gm3235	0.13020860582968344	1.830489096273777	1.0777310095501987e-06		0.038489904191936666	-0.273717	0.9567293115069778		0.0328337	-0.551104	0.3782336792813409		0.0365368	-0.331761	1		0.0295953	-0.616963	0.8021696901324349		0.0967245	1.1832340798213123	0.9862338045678373		0.0482503	0.17480279463455783	1		0.0341036	-0.378574	1		0.0312857	-0.104987	1		0	-4.05059	1
Gm37362	0.018601229404240492	2.3720764500443883	1.0930575394982112e-06		0.00515844	0.13836422344366373	1		0.00307473	-0.787099	0.40807193311503026		0.00282195	-0.850875	0.7874838945265892		0.00213575	-1.07988	0.7115810889132013		0.00899763	1.081094434852874	1		0.00185578	-0.411993	1		0.00250762	-0.73973	1		0	1.075826065270542	1		0	-0.867069	1
Il17rb	0.0355114	2.1082174114125554	1.093922067823615e-06		0.011209688591981555	0.13683416174452745	1		0.00647889	-0.855166	0.16423390279194086		0.00683209	-0.707298	0.7874838945265892		0.00579702	-0.852931	0.7576574492667191		0.021369375337182604	1.129559924189513	1		0.00742312	-0.193443	1		0.00651981	-0.619121	1		0.010428565036045442	0.969204	1		0	-1.97749	1
Gm16066	0.1975112358559354	1.8024334672167681	1.0947863910280948e-06		0.0689445	0.022131106957525404	1		0.0486466	-0.619206	0.24591110390954812		0.052725934220477784	-0.442054	0.9936495120048627		0.0353924	-1.0034	0.5106196189541353		0.13946329167424437	1.079446581971391	1		0.059385	-0.16194	1		0.0501524	-0.4532	1		0.052142825180227205	-0.141287	1		0.013561385944242128	-2.08418	1
Orc1	0.15929416453449585	1.8241632723397774	1.100966488008354e-06		0.0539652	-0.0148893	1		0.0360183	-0.747875	0.10611586015470864		0.0442601	-0.354621	1		0.0317311	-0.824293	0.6583336473303617		0.0944751	0.8378964446732486	1		0.053817624337374866	0.029482921284058605	1		0.0501524	-0.111266	1		0.020857130072090883	-0.816418	1		0.00271228	-3.34501	1
Gm27017	0.783619	1.7754099103834307	1.1017164409147618e-06		0.30801843431949316	0.23713647894366385	0.9550452694314123		0.20512836028344325	-0.537502	0.3124723044618437		0.19085302950229283	-0.620635	0.5447338952188412		0.1080076983577201	-1.42665	0.10536657311627415		0.5252367517086461	0.9717277519422651	1		0.32104996587468454	0.23571802661821883	1		0.15446930341890136	-0.861639	0.7985387870401077		0.11471421539649986	-1.15008	1		0.00542455	-5.09428	1
Gm17106	1.3335390461985501	1.7694786047594202	1.134385297942173e-06		0.4103936434073247	-0.258399	0.9469493567339116		0.4272775427531465	-0.174667	0.8970719153284713		0.34784264209678584	-0.51188	0.8126461004940608		0.2742907367898033	-0.829564	0.6215896928591103		0.9807418575801701	1.1065489031092888	0.9862338045678373		0.38043493066075335	-0.29994	1		0.2863700397798464	-0.740615	0.9266088180282086		0.1772856056127725	-1.33665	1		0.013561385944242128	-4.86553	1
Gm15614	0.9087546074398946	1.7726143796281169	1.1813629505421014e-06		0.3063320209914959	-0.0784376	1		0.20589704257572594	-0.792803	0.0414571		0.2894728050583414	-0.168395	1		0.24286476805860227	-0.424677	0.9472153333496969		0.6961917544061069	1.1718124112415838	0.9797692992332144		0.2783670224346976	-0.191128	1		0.1514601611445072	-1.11294	0.5169870751174389		0.16685704057672707	-0.862983	1		0.010849108755393702	-4.57292	1
1700016K05Rik	0.1251355432648906	1.8451830055787615	1.1923723038361257e-06		0.0373987	-0.238024	0.983066		0.030857103447348797	-0.576846	0.349412		0.0384677	-0.161876	1		0.0234932	-0.893448	0.625851		0.0978492	1.2730705143873213	0.9797692992332144		0.059385	0.539614	1		0.018054853646365096	-1.23751	0.487091		0.0417143	0.28638134107070545	1		0.00271228	-2.98128	1
Glra4	0.016233800207337157	2.559135798268554	1.192926503929535e-06		0.00337283	-0.247544	1		0.00197661	-1.13021	0.16987595668209926		0.00282195	-0.486992	1		0.000610213	-2.21298	0.3349162990438308		0.011247	1.7294954732891687	0.9956298772332848		0.00371156	0.5052396758844253	1		0.00351067	0.0270708	1		0	1.3957063315090457	1		0	-0.547189	1
Omg	0.027732742020867642	2.1443786789421804	1.210516397403008e-06		0.00932487	0.30513906751867825	0.9567293115069778		0.00461209	-0.975146	0.0958778		0.0056439	-0.581465	0.9936495120048627		0.00152553	-2.25895	0.0757546		0.00899763	0.3236647381269515	1		0.00371156	-0.555728	1		0.00902743	0.2430553855048725	1		0.010428565036045442	1.3503823409995555	1		0.00271228	-0.592513	1
Gm26531	0.0233361	2.3460812415114436	1.2295857785706278e-06		0.00545604	-0.220322	1		0.00439247	-0.593774	0.645361		0.00356457	-0.870951	0.7373951463400132		0.00183064	-1.6332	0.4450558417262947		0.012371743616263612	1.160528902347278	1		0.00371156	-0.163722	1		0.00702133	0.2926914185494498	1		0.010428565036045442	1.7408418175577332	1		0	-1.20854	1
Acta2	0.011498941813530486	3.0893058261493316	1.2405739390271491e-06		0.00188481	-0.244169	1		0.000658871	-1.83773	0.0624054		0.00163376	-0.401744	1		0	-3.00093	0.33706501392249644		0.00899763	2.3034868561893225	0.9797692992332144		0	-0.28271	1		0.000501524	-1.21062	1		0	2.213329589020476	1		0	0.2704343363234081	1
Gm49475	0.051407	1.9433110821002701	1.2448885856381355e-06		0.018451345823969637	0.22853995547329387	0.9763242113373077		0.010981175604038718	-0.734517	0.19953111842482962		0.011584853152668358	-0.593992	0.8775616705499208		0.00976341	-0.776717	0.7476373508950572		0.0281176	0.8440552375520243	1		0.012990461046952553	-0.165353	1		0.00752286	-1.09172	0.7229134449896337		0.010428565036045442	0.3160891634456773	1		0	-2.62922	1
Gm10785	0.37473022145269935	1.7957082168378182	1.246084289254139e-06		0.13342505447978045	0.0551992	1		0.0881788	-0.705672	0.12002414024681908		0.0980257	-0.483015	0.9605375288900257		0.0753613	-0.839201	0.6300009032277544		0.2328137207787789	0.8765770332712943	1		0.21898205764862877	0.7782690727490671	1		0.0862621	-0.610804	1		0.13557134546859073	0.15402376025809517	1		0.0189859	-2.59808	1
Gm13528	0.034835029611577646	2.0912673424826176	1.2655878511884471e-06		0.010515283103982698	0.029291468617655525	1		0.00713776	-0.672003	0.37661106436135616		0.00742619	-0.554485	0.9936495120048627		0.00366128	-1.48636	0.36394416842744054		0.0224941	1.2200708480016837	1		0.016702021346081855	0.8415100899309262	1		0.00451371	-1.10455	0.8176855011414522		0	-0.0193312	1		0.00271228	-0.958384	1
Gm15788	0.0426137	2.0210583402012157	1.2763275466189464e-06		0.012598499567979269	-0.0824431	1		0.00922419	-0.640946	0.368774		0.00920847	-0.59439	0.9384712686985034		0.0045766	-1.52763	0.27836469078591164		0.029242303092986723	1.2445931671357533	1		0.027836702243469756	1.1905953074574382	1		0.0100305	-0.347413	1		0	-0.35956	1		0	-2.30246	1
B430010I23Rik	2.712735655480236	1.7565264540574734	1.2922293029148139e-06		0.8528291400465966	-0.230744	0.9655445648908451		0.7030148621705588	-0.573274	0.24713523856484662		0.8452487088696875	-0.221595	1		0.8118883766381163	-0.262746	1		2.1875492121484297	1.2357388488035588	0.9797692992332144		0.9148996137353727	-0.0692639	1		0.3641062152016961	-1.44798	0.2133351556668426		0.31285695108136324	-1.58686	1		0.029835	-4.89978	1
Gm15261	0.0328058	2.4472429181976576	1.299516275006544e-06		0.00654725	-0.427252	0.9465191340267941		0.00384341	-1.30462	0.048844		0.00475276	-0.889071	0.786959		0.00366128	-1.13844	0.7216587248953953		0.0224941	1.5768632062445738	0.9923070469855888		0.00185578	-1.1751	1		0.017051806221567035	1.1780488526083275	0.33568023873291397		0	0.3160891634456773	1		0	-1.62681	1
Ankrd61	0.10957815139952581	1.850600749677279	1.3014047224574072e-06		0.0336291	-0.181619	1		0.029429550618823762	-0.419447	0.6602075128021804		0.0276254	-0.493679	0.9809016767648933		0.026544264850626127	-0.501502	0.9078539756286906		0.0753552	1.0860280278579881	1		0.038971383140857664	0.14219789630231894	1		0.018054853646365096	-1.03724	0.7063097829999835		0.020857130072090883	-0.25699	1		0.00271228	-2.78593	1
Gm49668	0.031453	2.06089	1.3255371707572373e-06		0.00932487	-0.0370479	1		0.00790645	-0.338559	0.8030494999797438		0.00608947	-0.733793	0.717397		0.00213575	-2.07988	0.0834911		0.021369375337182604	1.2766867968456062	1		0.011134680897387903	0.4414317068080358	1		0.00601828	-0.585779	1		0	0.10480513224230759	1		0	-1.83809	1
Gm16552	0.33177829173745316	1.787445859245024	1.3442403885340114e-06		0.11060887415981799	-0.0848858	1		0.0858728	-0.545992	0.3465700760129159		0.0905995	-0.417976	0.9936495120048627		0.0628519	-0.935708	0.5521740948988442		0.22156668112763017	0.9793745140400829	1		0.0853659	-0.413571	1		0.11083674044018572	-0.0571362	1		0.0312857	-1.48711	1		0.00271228	-4.4307	1
Gm34885	0.022321475285088592	2.441149498940981	1.3861962749407794e-06		0.00545604	-0.0471735	1		0.00318454	-0.979947	0.2265528650805555		0.00282195	-1.08764	0.5114845323031034		0.00335617	-0.686498	0.9314378615572352		0.010122335686033865	1.0180846373270729	1		0	-1.63321	1		0.00702133	0.4301949422993854	1		0	0.8628323419363433	1		0	-1.08006	1
4930511M06Rik	0.0953736	1.8518099756485276	1.3950834664550534e-06		0.0342243	0.13038332263781616	1		0.0213035	-0.742681	0.13427398860724427		0.0228727	-0.575038	0.8484309418251277		0.010678727238757638	-1.64351	0.0871971		0.0787293	1.3644457369770961	0.9797692992332144		0.042682943439986964	0.4744336291032498	1		0.0265808	-0.263088	1		0.010428565036045442	-0.642162	1		0.00271228	-2.58506	1
Gm44752	0.1975112358559354	1.7757655167546886	1.417110228333522e-06		0.0659685	-0.0936095	1		0.0608357	-0.241867	0.84597		0.0506466	-0.533132	0.8666494821761791		0.031426	-1.20257	0.31082130514721407		0.1552091471858526	1.219691885662661	0.9797692992332144		0.0630965	-0.0965277	1		0.0361097	-0.959594	0.7313878779645243		0.010428565036045442	-1.74899	1		0.00542455	-3.10634	1
Gm14097	0.015219187694378584	2.5152936249887166	1.458046403565745e-06		0.00347203	-0.109291	1		0.0018668	-1.14834	0.14762479595608538		0.00193081	-1.00156	0.6999258485215436		0.00183064	-0.882876	0.832894		0.012371743616263612	1.934253046523601	0.9797692992332144		0.00556734	0.9948241285283226	1		0.00200609	-0.618335	1		0	1.4584420868570076	1		0	-0.484453	1
Gm48696	0.13629628090743487	1.8164907929234912	1.5335532277293755e-06		0.0407715	-0.265141	0.9642408007785861		0.034371079640641185	-0.564122	0.3595652976256901		0.0393588	-0.295591	1		0.031120862238665115	-0.62186	0.8034305530090298		0.1124703965114874	1.3305212832371374	0.9797692992332144		0.016702021346081855	-1.35052	1		0.038115802142326315	-0.292898	1		0.0312857	-0.181562	1		0.00813683	-2.12446	1
4930473A02Rik	0.4281664804685175	1.768071001357429	1.6417852765673453e-06		0.1435435344477638	-0.0940667	1		0.1121178029172353	-0.543701	0.31181751310584876		0.1124324850842301	-0.501335	0.9070903978393147		0.0832941	-0.912449	0.5737954741628416		0.3182912221275093	1.1245590483660557	0.9862338045678373		0.18186645465733575	0.28892575020635114	1		0.13641444977253628	-0.14584	1		0.0938571	-0.546359	1		0	-5.81358	1
Gm16116	0.0388935	2.0423577420016716	1.6475299082037802e-06		0.00992008	-0.343471	0.9457605653410784		0.00944381	-0.418948	0.7479679457139139		0.0087629	-0.506567	0.9936495120048627		0.00640724	-0.895529	0.7056490847044469		0.0314917	1.5104161601379644	0.9797692992332144		0.011134680897387903	0.11865271538118094	1		0.00651981	-0.803389	1		0.010428565036045442	0.7904238464082933	1		0	-2.15583	1
Gm15567	0.0219833	2.251854479345594	1.741148808734189e-06		0.00664645	0.19471507782502773	1		0.00417285	-0.658019	0.518244		0.00282195	-1.20731	0.21468407617924232		0.00213575	-1.41371	0.5344940494327031		0.013496447581378487	1.3034868561893216	1		0.012990461046952553	1.3045086276609377	1		0.00150457	-1.66839	0.5354967804276004		0.010428565036045442	1.7604706243066657	1		0	-1.189	1
Gm10804	0.019954046088185254	2.3681075478414426	1.7797558359074057e-06		0.00515844	-0.00547155	1		0.00351398	-0.685853	0.5530088015854807		0.00326752	-0.738325	0.9672126100056253		0.00183064	-1.38735	0.5883227106187406		0.00562352	0.3648874008534637	1		0.0092789	1.100618792550919	1		0.00300914	-0.615185	1		0.010428565036045442	1.9806688322302017	1		0	-0.96988	1
Gm16214	0.0169102	2.4555703890917817	1.8516087923781194e-06		0.00297602	-0.63536	0.8403787130702104		0.00472191	0.22938909608039104	0.914736		0.00178229	-1.32749	0.2738250805983547		0.000610213	-2.34197	0.222162		0.010122335686033865	1.4455058610617488	1		0.011134680897387903	1.6371198043154296	1		0.000501524	-2.16423	0.396873		0	1.2684711432129374	1		0	-0.674424	1
Gm15342	0.018263	2.470528612435931	1.8718880975419524e-06		0.00555524	0.42934576865515517	0.9457605653410784		0.00164718	-1.66445	0.010973755857011741		0.00297048	-0.665774	0.9936495120048627		0.00122043	-1.68799	0.5200082575243181		0.00674822	0.7979588229625705	1		0.00185578	-0.318334	1		0.00351067	-0.210621	1		0.010428565036045442	2.1777056792897556	1		0	-0.77396	1
Gpr82	0.044642950570177184	1.9690115924316194	1.8923296585331468e-06		0.016070527007973557	0.26215712166608807	0.9574482089830162		0.010651740335917556	-0.517884	0.5724814958144402		0.00950552	-0.66317	0.7874838945265892		0.00427149	-1.73212	0.14576770335999464		0.0258682	0.9547587019582435	1		0.00556734	-0.952304	1		0.00702133	-0.959951	0.8512288405822458		0.010428565036045442	0.538078	1		0.00271228	-1.40482	1
Mest	0.029423762875798596	2.1881288817352074	2.0335847591384846e-06		0.00753926	-0.195122	1		0.00603965	-0.582468	0.5888205685349177		0.00534686	-0.729425	0.8669000300753243		0.00213575	-1.88846	0.23484122556931658		0.021369375337182604	1.475667831572001	0.9862338045678373		0.014846241196517205	1.0045721050798848	1		0.00501524	-0.642165	1		0	0.29208370043488774	1		0.010849108755393702	0.6902888519000276	1
Gm14764	0.0226597	2.4111762697333283	2.041597121335925e-06		0.00476164	-0.3605	0.9777605494844042		0.00439247	-0.487466	0.7636256610071896		0.00222786	-1.48551	0.12111496947544834		0.00274596	-1.00813	0.7792105668232099		0.0202447	1.9664518689117507	0.9797692992332144		0.00371156	-0.076259	1		0.00501524	-0.0912646	1		0	0.821012	1		0	-1.12188	1
Greb1l	0.0453194	1.975437861591053	2.161649591977097e-06		0.012796901135978943	-0.216618	0.9897188641374138		0.011749857896321428	-0.363734	0.7659140543089659		0.00905995	-0.760037	0.5961381209755972		0.00518681	-1.47775	0.30252928294069087		0.0404893	1.6000508855883098	0.9797692992332144		0.012990461046952553	0.0420388	1		0.011535	-0.273162	1		0.0312857	1.5268290618372582	1		0	-2.42445	1
Gm34035	0.019954046088185254	2.303012519619558	2.1946111542980346e-06		0.00644805	0.386666	0.9457605653410784		0.00406303	-0.49148	0.7496994334861722		0.00222786	-1.37004	0.14432829597803723		0.000915319	-2.26397	0.18727775878595865		0.00787293	0.748898	1		0.0092789	1.0543251402769842	1		0.00150457	-1.4918	0.6597330582996821		0	0.927927	1		0	-1.01497	1
1700037C18Rik	0.4954691104947695	1.7462255835764606	2.242695742184602e-06		0.16606211241572674	-0.117399	1		0.13287222480886848	-0.522038	0.3480845781109449		0.1445136168916194	-0.343795	1		0.12448344895466046	-0.540508	0.8444939069130702		0.30367007058101597	0.8150686086711882	1		0.21898205764862877	0.3278621664776873	1		0.10331388475420027	-0.79902	0.8719024904002063		0.11471421539649986	-0.510502	1		0.0461087	-1.86707	1
1110046J04Rik	0.0953736	1.866691775648782	2.3299705079105274e-06		0.026784211679955927	-0.334571	0.9457605653410784		0.025696	-0.398313	0.7125639392766909		0.0228727	-0.56206	0.899996		0.018916602537227815	-0.789187	0.7246607669057875		0.0854775	1.5014951188988097	0.9797692992332144		0.031548262542599056	0.0632111	1		0.0240731	-0.398039	1		0.0417143	0.6947944500382972	1		0.00542455	-1.98758	1
Gm38590	0.016233800207337157	2.688903673238884	2.3343277623510324e-06		0.00317443	-0.249177	1		0.00120793	-1.7814	0.020232238446418752		0.00415867	0.26555300041108953	1		0.000610213	-2.12746	0.45167171375213466		0.00674822	1.122157091474759	1		0.00371156	0.5907577470704828	1		0.00150457	-0.929208	1		0	1.4799752484066486	1		0	-0.46292	1
Cpne9	0.056818300725680046	1.9448849872288703	2.386013105362667e-06		0.0171617	-0.117229	1		0.011859669652361815	-0.773351	0.174252		0.014258280803284134	-0.415261	1		0.0109838	-0.752639	0.7773676781404293		0.0404893	1.2298518687942694	1		0.025980922093905106	0.6129534931846781	1		0.013039616522374791	-0.458014	1		0.010428565036045442	0.173314	1		0	-2.77177	1
Gm42726	0.25196210738471214	1.7354458861947555	2.441859980040668e-06		0.0857095	-0.0997864	1		0.063581	-0.639422	0.2017636085851125		0.0745589	-0.328459	1		0.0637673	-0.535563	0.8555487920386976		0.18895026613929883	1.11425	1		0.0705196	-0.325085	1		0.0697118	-0.381183	1		0.0625714	-0.32139	1		0	-5.07431	1
Tomm20l	0.024350700311005734	2.247144569439297	2.5714153540472742e-06		0.00545604	-0.390247	0.9518771768975589		0.00384341	-0.973061	0.15937089793345563		0.00460424	-0.612892	0.9936495120048627		0.00549192	-0.251255	1		0.011247	0.8925537552432141	1		0.00371156	-0.294682	1		0.0100305	0.6781224557429697	0.881677		0	0.6045203463449527	1		0	-1.33837	1
1700015O11Rik	0.011498941813530486	2.884947327643145	2.6246954489992783e-06		0.00168641	-0.594718	0.9457605653410784		0.00219624	-0.109398	1		0.00103967	-1.20011	0.7533940425646488		0.000305106	-2.10527	0.5728626091297696		0.00787293	1.981558761301958	1		0	-0.403725	1		0	-2.34978	0.6220261245724275		0	2.0923141880591105	1		0	0.14941893536204276	1
Gm26680	0.0737285	1.8175026572516821	2.8970640624061574e-06		0.029264231279951845	0.3026304169919145	0.9457605653410784		0.017569880966461948	-0.661216	0.24284448187787852		0.021832992480028828	-0.24993	1		0.00701745	-1.8917	0.034732673823244416		0.039364638779020585	0.6953347280962756	1		0.014846241196517205	-0.612631	1		0.013039616522374791	-0.944743	0.8012353462613818		0	-1.29921	1		0	-3.24211	1
Slc23a1	0.0351732	2.032923356251813	2.9086161729902423e-06		0.011804893295980575	0.1840678336255186	1		0.00680833	-0.820291	0.1954828047011461		0.0087629	-0.346331	1		0.00274596	-1.9345	0.12382555467007234		0.0202447	1.0083825493776697	1		0.011134680897387903	0.25785853436211603	1		0.00651981	-0.661728	1		0	-0.0757671	1		0	-2.01866	1
E030018B13Rik	0.0135282	2.7967426505210087	3.181573464462351e-06		0.00287682	0.00474413	1		0.00197661	-0.647131	0.7532010950120775		0.000891143	-1.71468	0.25345567168761207		0.000610213	-1.79448	0.6292786987952533		0.00674822	1.466985588472201	1		0.00371156	0.9237410304668403	1		0.000501524	-1.62109	0.8718893404380137		0.010428565036045442	2.821012166241716	1		0	-0.135558	1
Gm27252	0.011160737642544296	2.8161601043482483	3.2834162970614212e-06		0.00168641	-0.594718	0.9457605653410784		0.00175699	-0.497911	0.8260133037425184		0.00193081	-0.280281	1		0.000305106	-2.10527	0.5524211769198034		0.00674822	1.7709917753623001	1		0	-0.403725	1		0	-2.34978	0.6005463654749389		0	2.0923141880591105	1		0	0.14941893536204276	1
C79798	0.16977849383506777	1.7420373648117615	3.3025691354238908e-06		0.0572389	-0.110588	1		0.0428266	-0.633566	0.22883669098444862		0.0500525	-0.328271	1		0.039968950522207156	-0.638128	0.77985		0.15858325908119722	1.4567604869607758	0.9797692992332144		0.031548262542599056	-0.87234	1		0.041124944416720495	-0.569348	1		0.020857130072090883	-0.971215	1		0.010849108755393702	-2.17582	1
1700087M22Rik	0.21915630279905163	1.7289442787719813	3.3025691354238908e-06		0.072119	-0.171276	1		0.0606161	-0.483101	0.48342126228947935		0.0660931	-0.301887	1		0.0454609	-0.843039	0.6313153622951055		0.18332674631372445	1.2757156846315332	0.9797692992332144		0.0797985	0.050017298793521014	1		0.053663037226696256	-0.567166	1		0.010428565036045442	-1.93489	1		0.00542455	-3.29232	1
Gm49691	0.019615841917199065	2.388947891123302	3.3245108422080523e-06		0.00545604	0.16076774590168963	1		0.00285511	-0.98452	0.22541727602802203		0.00222786	-1.27906	0.2793239041152408		0.00305106	-0.662516	0.9302398972257906		0.0168706	1.9026074199071363	0.9797692992332144		0.00185578	-0.476482	1		0.00150457	-1.40669	0.7847555664731635		0	1.0116957278508263	1		0	-0.9312	1
Gm43964	0.034835029611577646	1.9892676289802225	3.3306401234365035e-06		0.010019279183983513	-0.167506	1		0.00955362	-0.247658	0.8766433204480352		0.00727766	-0.673118	0.8309668331650342		0.00305106	-1.81203	0.14583052793586182		0.021369375337182604	1.0669942378080188	1		0.014846241196517205	0.6092304071419603	1		0.00902743	-0.221155	1		0	-0.0940989	1		0	-2.03699	1
Sox1ot	0.010146125129585723	2.91422	3.3328163985468043e-06		0.00198402	-0.0503974	1		0.00142755	-0.605552	0.7682795558578228		0.000297048	-2.50267	0.0596457		0.000610213	-1.30349	0.7667462203305696		0.0011247	0.0746682	1		0.00371156	1.414727382978982	1		0.00250762	0.5283753362382875	1		0	2.287330170464254	1		0	0.3444349177671846	1
Abra	0.016233800207337157	2.440083126624791	3.3667066680755214e-06		0.00386883	-0.0947915	1		0.00252567	-0.827944	0.4151472139388081		0.00415867	0.0609353	1		0.000915319	-1.86883	0.4330813989153528		0.00562352	0.7185243554681646	1		0	-1.17995	1		0.00100305	-1.52155	0.7803352141050739		0	1.3160891634456773	1		0	-0.626806	1
Gm20069	0.0179248	2.5380325492837548	3.389322467021403e-06		0.00367043	-0.294323	1		0.00241586	-0.98888	0.3159233257900686		0.00207933	-1.13116	0.5831809451772608		0.000915319	-1.94579	0.4761030398342066		0.014621151546493362	1.9409167768046132	0.9797692992332144		0.00742312	1.1037585000814873	1		0.00451371	0.20563468428022613	1		0.010428565036045442	2.2498554650455906	1		0	-0.702258	1
Gm10248	0.10010843461191246	1.8061201828438342	3.433594302698918e-06		0.030653	-0.231141	0.9873670243337859		0.031955221007752665	-0.145159	0.9598746820271606		0.024506420130644604	-0.581294	0.8346772646162346		0.0195268	-0.86365	0.6583336473303617		0.0641081	0.9459348515712374	1		0.0445387	0.428046	1		0.018556377358764125	-0.898511	0.8473869024212384		0.020857130072090883	-0.160551	1		0	-3.69073	1
Gm47371	0.17451335222887443	1.7790723595070923	3.487341743096386e-06		0.056346	-0.156384	1		0.0395322	-0.786046	0.0852962		0.0528745	-0.247807	1		0.0485119	-0.352843	1		0.16983029873234595	1.5500061752400982	0.9797692992332144		0.0371156	-0.659238	1		0.031595993881138915	-0.968886	0.7732625175654154		0.0417143	-0.244133	1		0.00813683	-2.50961	1
Gm16175	0.022321475285088592	2.2550532068275233	3.60023378490051e-06		0.00386883	-0.836994	0.43035234369421743		0.0074672	0.3967733952971306	0.7636256610071896		0.00163376	-2.02114	0.00548853		0.00122043	-2.13186	0.2011285240022576		0.00674822	0.3492905458024458	1		0.00185578	-0.755198	1		0.013541140234773822	1.28581	0.21154774969065132		0	0.7343577839875346	1		0	-1.20854	1
Rptoros	0.3141916748461712	1.7281228274777825	3.7650237124492197e-06		0.1187433384478046	0.1032122382330738	1		0.0835667	-0.553723	0.3325546409067572		0.0882231	-0.424234	0.9936495120048627		0.061936617984794294	-0.923204	0.5679245600535111		0.19569848992998806	0.82729	1		0.13732773106778415	0.30405715056731797	1		0.061185892912681714	-0.910866	0.7724921730143289		0.0834285	-0.282437	1		0.016273663133090553	-2.58861	1
Smim18	0.0466722	1.9195312543032035	3.8749470438831034e-06		0.012499298783979432	-0.371189	0.9457605653410784		0.010651740335917556	-0.641096	0.3522396828722215		0.012921566977976246	-0.2705	1		0.010678727238757638	-0.514703	0.9316265507970418		0.032616414988331344	1.188009638769385	1		0.012990461046952553	-0.0429308	1		0.014544187659571882	-0.0223173	1		0	-0.565405	1		0	-2.5083	1
Xkr4	0.19277637746212875	1.7552353272848258	4.016785520986541e-06		0.0684485	0.00601909	1		0.0601768	-0.237339	0.864293		0.0461909	-0.663572	0.5948290161637306		0.0317311	-1.16811	0.3849908999223696		0.16195737097654184	1.3047310951977842	0.9797692992332144		0.046394503739116265	-0.511233	1		0.032599	-1.08946	0.6362332190959434		0.010428565036045442	-1.72977	1		0.00813683	-2.67149	1
Gm26672	0.5198198108057752	1.716450731405034	4.054740646641569e-06		0.21794412244764136	0.3070597221578035	0.9455071295329556		0.1010268155571562	-1.10328	0.00136443		0.16025713527857896	-0.27634	1		0.0921422	-1.09538	0.39057689222385106		0.36440408469721913	0.9931467355771706	1		0.33589620707120177	0.8607312329410397	1		0.0887697	-1.11826	0.525235		0.5527139469104084	1.5761143711425247	1		0.00271228	-5.13279	1
Gm12264	0.012175350155502867	2.5845136741121584	4.178186653750363e-06		0.00257922	-0.184253	1		0.00285511	0.015480097779564161	1		0.00103967	-1.49289	0.2952212902516451		0.000610213	-1.78054	0.5796358967257107		0.00337411	0.6310615142178246	1		0.00371156	0.9376802214247144	1		0.00100305	-1.00838	1		0	1.821012166241716	1		0	-0.121883	1
Cubn	0.0179248	2.343654504116903	4.207472198915125e-06		0.00486084	0.0659818	1		0.00307473	-0.747571	0.48155937869714815		0.00297048	-0.733793	0.9709648420068967		0.00183064	-1.24669	0.6608618781112097		0.00787293	0.9371646419435047	1		0.0092789	1.2404764561338801	1		0.00150457	-1.30772	0.8634382198177066		0	1.1089929292057414	1		0	-0.833902	1
Gm26693	0.10044663878289865	1.7734948770865664	4.3814810941760005e-06		0.031446648527948255	-0.221834	0.9873670243337859		0.028551056570500666	-0.390714	0.702236		0.0282195	-0.380238	1		0.0195268	-0.895041	0.6241409673319042		0.0843528	1.3262069326894044	0.9797692992332144		0.038971383140857664	0.2097837923582535	1		0.0225686	-0.644198	1		0	-1.77763	1		0.00542455	-2.13329	1
Gm17090	0.0683172	1.8497126640592758	4.459246069917419e-06		0.0218242	-0.104845	1		0.0183386	-0.42052	0.6859762206106859		0.015892042145327107	-0.625132	0.7971825925185236		0.011594046716365434	-1.0266	0.5796358967257107		0.0573599	1.3947478361884338	0.9797692992332144		0.031548262542599056	0.5384870002106483	1		0.014042663947172853	-0.699911	1		0	-1.16518	1		0.00271228	-2.10634	1
Akap14	0.0365261	2.022950399542424	4.459246069917419e-06		0.011209688591981555	-0.00704105	1		0.00812607	-0.590512	0.5161158872053523		0.00742619	-0.689573	0.8309668331650342		0.0048817	-1.20625	0.5589412330573091		0.039364638779020585	1.9303800373763966	0.9797692992332144		0.011134680897387903	0.19552147876545156	1		0.00250762	-1.97651	0.24775243793413865		0	-0.137168	1		0	-2.08006	1
Gm16093	0.10551970134769152	1.7806652760281825	4.592208985819592e-06		0.038688305759936335	0.097614	1		0.0272333	-0.556442	0.39918178947006977		0.0253976	-0.631827	0.717397		0.016780857089476287	-1.18906	0.3968270201729821		0.0629834	0.8200953386078433	1		0.046394503739116265	0.38871878448143704	1		0.0361097	-0.0150781	1		0	-1.84304	1		0.00271228	-2.78485	1
Gm26852	0.041260908860315276	1.9707720502960573	4.627825155491957e-06		0.011705692511980737	-0.212217	1		0.00966343	-0.548608	0.5477925646432232		0.0087629	-0.664779	0.8380106965417292		0.00762766	-0.785919	0.7773676781404293		0.026992895162756974	1.1367714112228988	1		0.025980922093905106	1.1037585000814865	1		0.010531997960379638	-0.267587	1		0.010428565036045442	0.6526146345459978	1		0	-2.29333	1
Gm50145	0.015895596036350965	2.3961219240110383	4.941734937946345e-06		0.00426563	0.0961512	1		0.0037336	-0.151834	1		0.00207933	-1.04811	0.5890214686476876		0.000305106	-2.88846	0.0996447		0.00674822	0.9509704414685363	1		0	-1.17995	1		0.00150457	-1.09666	0.9886749379685447		0	1.3160891634456773	1		0	-0.626806	1
Usp46os2	0.011837145984516677	2.7955287715761186	4.967016695601904e-06		0.00277762	0.20025326136645738	1		0.00153736	-0.832517	0.5979881362395609		0.00103967	-1.30445	0.5938905380209026		0.000610213	-1.60184	0.6777521463104005		0.00449882	1.1496815201102857	1		0	-0.499941	1		0.000501524	-1.4304	0.9787184144846629		0.010428565036045442	3.0116957278508254	1		0	0.053203620102738824	1
C78197	0.019615841917199065	2.2577	5.01606656352497e-06		0.00535684	-0.00374733	1		0.00428266	-0.408319	0.797702		0.00297048	-0.945297	0.647221		0.000610213	-2.69395	0.0791884		0.011247	1.223759663718587	1		0.0092789	1.0467519205721834	1		0.00351067	-0.469082	1		0	0.920548	1		0	-1.02235	1
Avpr2	0.020630454430157638	2.189853562204668	5.1215673840838585e-06		0.00615045	0.10351526344217721	1		0.00274529	-1.28978	0.030837		0.00386162	-0.670189	0.9760962066115878		0.00396638	-0.515505	0.979334		0.00787293	0.6169863290061022	1		0.014846241196517205	1.5296631498236426	1		0.00451371	-0.257337	1		0	0.800548	1		0.00271228	-0.135558	1
Gm35060	0.0263799	2.0869257952973896	5.277647466317114e-06		0.00892807	0.257725	0.9816378733691982		0.00483172	-0.862637	0.200186		0.00415867	-1.03143	0.3415961680265232		0.00366128	-1.0766	0.6480738282033475		0.019119967406952855	1.4019494950750095	1		0.014846241196517205	1.0902021766055814	1		0.00401219	-0.855856	1		0	0.3753863471294494	1		0	-1.56751	1
Pde6h	0.16977849383506777	1.7089679730267018	5.360302530430232e-06		0.0691429	0.23618405864246084	0.956354		0.0460111	-0.538365	0.38299556292760595		0.0472306	-0.456345	0.9936495120048627		0.0259341	-1.31479	0.22436201862042746		0.10684687668591303	0.8331669214092883	1		0.0649523	0.1137462265365321	1		0.0341036	-0.871788	0.8290262759032072		0.0312857	-0.581086	1		0	-4.52593	1
Gm10603	0.0510688	1.8642335389953022	5.4088656091309836e-06		0.018649747391969312	0.1786896538989513	0.9879718743818827		0.011859669652361815	-0.661796	0.29562754584296547		0.013664185769813961	-0.377943	1		0.0048817	-1.82516	0.0855829		0.029242303092986723	0.8489209927238406	1		0.022269361794775806	0.496484	1		0.011535	-0.538623	1		0.010428565036045442	0.2661310047584209	1		0	-2.6791	1
Gm49417	0.0791398	1.8345809027313082	5.631718676442881e-06		0.0230146	-0.300604	0.9556149739422807		0.0237193	-0.234408	0.8682024470671652		0.0199022	-0.510451	0.9936495120048627		0.014645111641724759	-0.914481	0.6388551290496778		0.060734	1.2440686461189268	0.9937394172672481		0.014846241196517205	-0.702249	1		0.0200609	-0.411925	1		0.0312857	0.6163944466332447	1		0.00271228	-2.32948	1
B3gat2	0.10822533471558105	1.7533765372704813	5.700123886165332e-06		0.0422595	0.19734533386969932	0.9834339595593445		0.0272333	-0.626641	0.2711468326608157		0.0286651	-0.497438	0.9760962066115878		0.013424685671581029	-1.57624	0.10444231337984915		0.0776046	1.0708260993990462	1		0.0296925	-0.292226	1		0.030091422743941824	-0.347879	1		0.010428565036045442	-0.899371	1		0.0189859	-0.835998	1
9430041J12Rik	0.12006248070009773	1.7449990754270104	6.075028290102926e-06		0.043846746527927846	0.0512042	1		0.037116373541650864	-0.265303	0.8293216497654611		0.029110656640038438	-0.651665	0.647221		0.0173911	-1.35824	0.2302906180973951		0.0742305	0.8411219358823039	1		0.061240744935633466	0.5663482549246743	1		0.027082280469547644	-0.665608	1		0.010428565036045442	-1.05533	1		0	-3.99916	1
Gm15787	0.21340683189228637	1.6965914587977307	6.081690954095729e-06		0.074103	-0.100392	1		0.0631418	-0.393051	0.6749866636212357		0.0617859	-0.400691	1		0.0475966	-0.759423	0.6819559931321734		0.14058799563935925	0.8889861736760714	1		0.1280488303199609	0.7469623579834654	1		0.039620373279523405	-1.00118	0.6892594418127315		0.11471421539649986	0.6684939165544894	1		0.00542455	-3.27903	1
Gm20470	0.23741932803230592	1.691852191620185	6.204935480701817e-06		0.0747974	-0.292985	0.9457605653410784		0.0730248	-0.327128	0.7636256610071896		0.0699547	-0.375459	1		0.0671234	-0.400876	0.9788162809471238		0.15858325908119722	0.9048936880178551	1		0.0797985	-0.0961413	1		0.0682072	-0.359555	1		0.020857130072090883	-1.49357	1		0.00271228	-4.02189	1
Gm12977	0.0321294	1.9600228092043652	6.237637884250659e-06		0.00912647	-0.220322	0.9897188641374138		0.00801626	-0.445342	0.719905		0.00831733	-0.3445	1		0.00701745	-0.536985	0.929489		0.014621151546493362	0.6270260009826689	1		0.016702021346081855	0.8613004556909329	1		0.00451371	-1.08476	0.7972971859142206		0	-1.76927e-05	1		0	-1.94291	1
BB365896	0.0135282	2.5557345510172143	6.237637884250659e-06		0.00327363	0.042712	1		0.0018668	-0.923913	0.4115015268256134		0.00178229	-0.905663	0.9122030427895819		0.000915319	-1.52449	0.6402664460479172		0.012371743616263612	2.1469823705093294	0.9797692992332144		0	-0.843425	1		0.000501524	-1.7772	0.7212015149633141		0	1.6526146345459969	1		0	-0.290281	1
Map3k12	0.31047142896532315	1.6990602764132317	6.4760753625903285e-06		0.10783125220782257	-0.0972004	1		0.0874102	-0.480185	0.4747265489752697		0.0972831	-0.264203	1		0.0704796	-0.732789	0.6954423984922653		0.19682319389510294	0.830335	1		0.11320258912344368	0.0193585	1		0.0667027	-0.788753	0.8945986184591569		0.10428565036045441	0.00245904	1		0.0461087	-1.22746	1
Gm20663	0.1545593061406892	1.7007367339019464	6.751398903387189e-06		0.0404739	-0.625627	0.33911974291414726		0.060067	0.1251870262151309	0.9306287516486914		0.037130939591885764	-0.70673	0.48240403562665113		0.022577880447659005	-1.38609	0.18021799242697095		0.13496447581378487	1.3207289351178035	0.9797692992332144		0.027836702243469756	-0.939492	1		0.0802438	0.5529416488933858	0.7676054847646416		0	-2.45414	1		0.00271228	-3.39632	1
Gm4632	0.010822533471558104	2.7730913824563626	6.751398903387189e-06		0.00228162	-0.0276773	1		0.000988306	-1.38049	0.16864175882174748		0.00163376	-0.522039	1		0.00152553	-0.433891	1		0.00337411	0.9284474248423962	1		0.00185578	0.6298273117490734	1		0.000501524	-1.31623	0.949873		0	2.1089929292057414	1		0	0.1660976765086719	1
Gm4524	0.067979	1.799721580014035	6.751398903387189e-06		0.026189006975956906	0.21973177429565371	0.9772648117076271		0.00988306	-1.49769	0.000115186		0.017674327245737625	-0.485019	0.9936495120048627		0.0094583	-1.35672	0.29532571297612864		0.12034332426729151	2.5211559578141935	0.0342353		0.027836702243469756	0.33358586052536143	1		0.00702133	-1.70731	0.21520466923489132		0.010428565036045442	-0.194363	1		0.0189859	-0.127026	1
Gm28505	0.0213069	2.1526678871467615	6.751398903387189e-06		0.00823367	0.617406	0.6304414482009966		0.00318454	-1.13607	0.0634287		0.00282195	-1.23573	0.20678080163869156		0.00213575	-1.44056	0.5148290404807805		0.015745855511608235	1.496131934131717	1		0.011134680897387903	1.0783888451674537	1		0.00100305	-2.11629	0.2829360556188989		0	0.7279027618502347	1		0	-1.21499	1
Gm48512	0.1907471524362116	1.7195528263685484	6.795052894751621e-06		0.0692421	0.012080365726313769	1		0.044913	-0.774347	0.0861711		0.058221313280076875	-0.289774	1		0.0466813	-0.598332	0.8213342632144168		0.14508681149981872	1.1249560641793317	1		0.0797985	0.24598443407382486	1		0.0436326	-0.673821	1		0.073	0.2614620846935747	1		0	-4.68551	1
Gm47373	0.0172484	2.351134469237728	6.904833051496008e-06		0.00585285	0.5436102203126589	0.8678880616657986		0.00285511	-0.79968	0.43379468428787166		0.00207933	-1.2097	0.3762851790381212		0.00122043	-1.68799	0.5108277862154604		0.00449882	0.29449807296206654	1		0.00371156	0.2754525943768549	1		0.00200609	-0.915829	1		0	1.1689354696620233	1		0	-0.77396	1
Gm16036	0.0395699	2.0624470664461168	6.941825147348836e-06		0.011209688591981555	-0.124398	1		0.00614946	-1.16116	0.034062307907464964		0.00787176	-0.693151	0.8786419098844039		0.00427149	-1.48292	0.4387340545011913		0.030367007058101594	1.4455058610617497	0.9797692992332144		0.020413581645211155	0.9030815599007473	1		0.0200609	0.8323264573812912	0.5823275462393117		0.010428565036045442	0.7803701817443702	1		0	-2.16586	1
Gm38204	0.033482212927632884	1.9575159535937905	6.976681467718221e-06		0.010316881535983024	-0.0657726	1		0.011200799116119492	0.0960558	0.9953198129901933		0.00594095	-0.959422	0.3297535944215567		0.00427149	-1.31515	0.46384043967735905		0.0168706	0.7643280450812897	1		0.00185578	-1.55324	1		0.00551676	-0.876466	0.9365607314885075		0	-0.0609321	1		0	-2.00383	1
Ovol1	0.015557391865364775	2.3799621341872212	7.058108019138921e-06		0.00426563	0.12363197976354456	1		0.00307473	-0.472463	0.7871371974380393		0.00222786	-0.922577	0.8095714169246763		0.000610213	-2.27395	0.26570271903876097		0.00674822	0.9712904258481316	1		0.00742312	1.2012750059957495	1		0.00100305	-1.50179	0.768994		0	1.335585339071475	1		0	-0.60731	1
Gm34868	0.058171117409624815	1.8738188735396495	7.168468526016327e-06		0.020435361503966375	0.10975980518198636	1		0.012189104920482977	-0.830396	0.11857232157140077		0.015149423353489391	-0.415684	1		0.00793277	-1.32072	0.39587517160802943		0.0371152	1.0094067462550758	1		0.025980922093905106	0.5240440773224826	1		0.014544187659571882	-0.390118	1		0.0625714	1.903820753387182	1		0	-2.85885	1
Cxcr5	0.0771106	1.7972677442632525	7.301633251452919e-06		0.025891404623957396	-0.0613685	1		0.023389904036602467	-0.248749	0.864487		0.018268422279207795	-0.641663	0.7507805438310141		0.014645111641724759	-0.905072	0.636107		0.0596093	1.2254843441880485	0.9957910710657404		0.0092789	-1.28271	1		0.015045711371970912	-0.821466	0.9414085307128949		0.020857130072090883	0.20882819678553588	1		0.00271228	-2.32053	1
Vmn1r46	0.011498941813530486	2.5254049409560064	7.514740859343848e-06		0.00357123	0.5296993255378375	0.9457605653410784		0.000768682	-2.00548	0.00680172		0.00163376	-0.801015	0.9919992652498469		0.00122043	-0.971786	0.8281354063591788		0.00787293	1.7336312478583729	1		0.00371156	0.9803245588332077	1		0	-2.57927	0.35990484258090377		0	1.8628323419363442	1		0	-0.0800629	1
Hyal6	0.023674291969033354	2.157598453799663	7.846577642177762e-06		0.00853127	0.4677335722314435	0.8847532623952642		0.00417285	-0.86447	0.25738382553811207		0.00415867	-0.801561	0.8023807162618956		0.000915319	-2.61564	0.0612786		0.0168706	1.439300711535041	1		0.00371156	-0.318334	1		0.00250762	-1.24669	0.789982		0	0.5810613735209635	1		0	-1.36183	1
Lrrc19	0.12242990989700106	1.7454273535628002	8.1154797558096e-06		0.038589104975936504	-0.237483	0.9843765623892758		0.0310767	-0.619035	0.29488546325896553		0.0375765	-0.25582	1		0.0356975	-0.304155	1		0.0989739	1.2429730714675906	0.9797692992332144		0.0371156	-0.169306	1		0.028586851606744734	-0.614913	1		0.020857130072090883	-0.497247	1		0.00271228	-3.02602	1
Tiam2	0.038217071321439554	1.990045292303817	8.159268193338205e-06		0.00972168	-0.398321	0.9457605653410784		0.010981175604038718	-0.161119	0.9743536795628447		0.00698062	-0.88941	0.484178		0.0048817	-1.2989	0.4980625055183703		0.023618783267412354	1.0729205034071727	1		0.018557801495646505	0.7707294119608745	1		0.0120366	0.057536045291092464	1		0	-0.226294	1		0.010849108755393702	0.1660976765086719	1
Ghrl	0.0084551	2.826472478784387	8.317129436235647e-06		0.00138881	-0.428909	0.9873670243337859		0.00142755	-0.356192	0.8914765169526334		0.00103967	-0.760826	1		0.000915319	-0.656284	1		0.0011247	0.2811190431608672	1		0	-0.00517587	1		0.00100305	-0.321878	1		0	2.490863564549385	1		0	0.5479683118523173	1
Tead2	0.0852275	1.7403601806234898	9.192510476243254e-06		0.029760235199951027	-0.0437919	1		0.020534798379552403	-0.713928	0.1683508032053358		0.0243579	-0.380683	1		0.0219677	-0.4934	0.9166910533646594		0.0708563	1.2866785685027673	0.9797692992332144		0.0445387	0.6129534931846781	1		0.017051806221567035	-0.834195	0.9069169025662046		0.020857130072090883	0.020872374225802126	1		0	-3.50961	1
Notum	0.019954046088185254	2.220550359427585	9.409388354513464e-06		0.00674565	0.39634893899467727	0.9457605653410784		0.00318454	-0.97168	0.20881864768301853		0.00401014	-0.530259	1		0.00122043	-1.9937	0.27651360582380635		0.00562352	0.2590927368308673	1		0.011134680897387903	1.2245213504880033	1		0.00200609	-1.22154	0.8906174194045111		0	0.8699217667226629	1		0	-1.07297	1
Gm4279	0.020968658601143827	2.2809555987463597	9.68672491566573e-06		0.00545604	-0.0759325	1		0.00483172	-0.292502	0.8947613037610413		0.00267343	-1.1925	0.3623573586274205		0.000915319	-2.35143	0.2018778138335538		0.010122335686033865	0.9960583309970739	1		0.00556734	0.3667929059152808	1		0.00601828	0.18626935941329492	1		0	0.8417707264085141	1		0	-1.10112	1
Wnt4	0.077787	1.769279768506344	1.0057942110640103e-05		0.0268834	-0.0337264	1		0.021852539452037047	-0.415652	0.6859762206106859		0.018268422279207795	-0.680542	0.651857		0.0207472	-0.415969	0.9864548448001688		0.0517364	0.9784924582541752	1		0.038971383140857664	0.5812777870472319	1		0.0125381	-1.11779	0.6597330582996821		0.0417143	0.9146712734559621	1		0	-3.356	1
Gm27240	0.0081169	2.9179875894071525	1.0387938073586988e-05		0.00119041	-0.54963	0.9685846991533942		0.000988306	-0.814138	0.6684672180137493		0.00103967	-0.63307	1		0.000610213	-0.976684	0.9256734744905278		0.00224941	1.0058063075486352	1		0.00185578	1.1323276522782564	1		0.00100305	-0.204521	1		0.010428565036045442	3.6283670882993198	1		0	0.6616250936478849	1
Gm17546	0.019954046088185254	2.105073142007649	1.0732527711653213e-05		0.00813446	0.6843970751130746	0.460549		0.00285511	-1.24298	0.034197394858778145		0.00341605	-0.878182	0.6692075304207027		0.00152553	-1.80829	0.31949747482457486		0.00674822	0.4034826461660428	1		0.00742312	0.6400471540669539	1		0.00401219	-0.430402	1		0	0.7870648343183788	1		0.00271228	-0.149105	1
Plppr3	0.0260417	2.3595960479859244	1.0812303680657807e-05		0.00644805	-0.0987604	1		0.00384341	-0.993622	0.25243931296824984		0.00401014	-0.852187	0.8912397151420511		0.00183064	-1.78454	0.4998193436282116		0.010122335686033865	0.7305971877687396	1		0.016702021346081855	1.4663285794661949	1		0.00902743	0.5018836803684552	1		0	0.5868904523231615	1		0	-1.356	1
1700095J12Rik	0.00879331	2.990544753981262	1.0824380985944217e-05		0.000892807	-1.09479	0.672686		0.00109812	-0.731083	0.7560536088380543		0.000891143	-0.928809	0.9936495120048627		0.000305106	-1.65628	0.7066010308324594		0.00674822	2.2528607831193534	0.9804846534251275		0.00371156	1.6699844382210562	1		0.00150457	0.16242261745892783	1		0	2.5352576839078393	1		0	0.5923624312107698	1
Gm45502	0.0175866	2.417089353474471	1.1360131369111096e-05		0.00367043	-0.364712	0.9866376024670428		0.00263548	-0.910712	0.37538882486940817		0.00282195	-0.726179	0.9936495120048627		0.00244085	-0.785203	0.9081778985109451		0.013496447581378487	1.7655218350053348	0.9804846534251275		0.00371156	0.29326387049331526	1		0.00351067	-0.192242	1		0.010428565036045442	2.195407681023214	1		0	-0.756366	1
5430427M07Rik	0.046334	1.9232242377733009	1.1375597052689275e-05		0.014284912895976495	-0.099307	1		0.011640046140281041	-0.468947	0.6815150368568773		0.00891143	-0.866308	0.47003286234262376		0.0045766	-1.72613	0.195512		0.0314917	1.1502405958936386	1		0.00742312	-0.715669	1		0.0240731	0.7536734887501471	0.6434114637203024		0.010428565036045442	0.4504492961034776	1		0	-2.4951	1
Traf3ip2	0.21915630279905163	1.6501098826243266	1.1479329399299796e-05		0.075591	-0.162453	1		0.0661067	-0.403572	0.6506008589941035		0.0699547	-0.277469	1		0.059495766044506834	-0.497879	0.8910874495099769		0.15408444322073772	0.9484869396963096	1		0.0630965	-0.346706	1		0.05266	-0.6587	1		0.020857130072090883	-1.41067	1		0.010849108755393702	-2.61563	1
Gm50013	0.35782001290338983	1.6586275267383384	1.2019777089112128e-05		0.11785053139180607	-0.242398	0.9589815792248374		0.10311323892192356	-0.4776	0.44593315785084175		0.11480886521811078	-0.261061	1		0.10221067499953738	-0.414358	0.963723		0.2811759912787185	1.1202123010879892	0.9902133188032591		0.10392368837562042	-0.342818	1		0.10281236104180123	-0.389325	1		0.0417143	-1.37344	1		0.00271228	-4.63916	1
3632454L22Rik	0.00879331	2.846154844646086	1.2020088503627633e-05		0.00168641	-0.13786	1		0.000988306	-0.996342	0.5387143994256943		0.00103967	-0.80892	1		0.000610213	-1.13844	0.8338770576588769		0.00337411	1.2811190431608672	1		0.00185578	0.9731290574290021	1		0.00100305	-0.366272	1		0	2.4477948426575002	1		0	0.5048995899604307	1
Zdhhc2	0.11059276391248438	1.701585417480668	1.2037372061328603e-05		0.034125069695943845	-0.32255	0.9457605653410784		0.031186538715469957	-0.474334	0.5429393774563973		0.033863416907799815	-0.299898	1		0.024103412910338667	-0.783341	0.6900198039963248		0.0708563	0.8605433603405932	1		0.024125141944340456	-0.647282	1		0.0556691	0.5081974543006575	0.8419686400874387		0.0312857	0.031431945912088644	1		0.00542455	-2.32749	1
Gm15996	0.024012496140019546	1.9952982839518958	1.2413454013405016e-05		0.00922567	0.4273758346153018	0.9041452219323513		0.00527096	-0.634698	0.4781800869817089		0.00415867	-0.956839	0.43625773028984866		0.00335617	-1.12746	0.6203397380590324		0.00899763	0.42356330818107235	1		0.00556734	-0.0375973	1		0.00501524	-0.486327	1		0	0.4425005429879869	1		0	-1.50039	1
Gm8739	0.0436283	1.8335272363183375	1.260005066716947e-05		0.012499298783979432	-0.32967	0.9457605653410784		0.012848	-0.267229	0.855403		0.0121789	-0.332866	1		0.010068514253685773	-0.568821	0.8953825834274742		0.0202447	0.5318236412750261	1		0.020413581645211155	0.585262	1		0.0100305	-0.528543	1		0	-0.533521	1		0	-2.47642	1
Gm16279	0.2161124652601759	1.6393497775026273	1.260005066716947e-05		0.0883879	0.16694954944231588	0.9873670243337859		0.055454936800395524	-0.700561	0.13026209391186627		0.0652019	-0.383381	1		0.0469864	-0.845305	0.6295869217998376		0.15858325908119722	1.0040853303185666	1		0.12433727002083159	0.6398460675740654	1		0.0481463	-0.77911	0.9092586102771588		0.020857130072090883	-1.39892	1		0.00542455	-3.34182	1
D530033B14Rik	0.33854237515717694	1.6545900326028267	1.2725497580674823e-05		0.10674004358382436	-0.3295	0.9455071295329556		0.14681831782599766	0.2955997159066932	0.7547343605218152		0.0855497	-0.666119	0.5270781331245429		0.0655979	-1.00959	0.4790641180657279		0.20919493751136656	0.7553140144699042	1		0.11691414942257299	-0.0958497	1		0.0486478	-1.41625	0.2652354849613924		0.0834285	-0.447419	1		0.00271228	-4.56246	1
Gm43713	0.7487840345634263	1.6354069451641646	1.2852797549572044e-05		0.25792203839957556	-0.180203	0.9873670243337859		0.20315174867471628	-0.607196	0.2016736126358186		0.243133	-0.262509	1		0.21448986425276054	-0.431156	0.9432866341169709		0.6590765235573162	1.271434087032636	0.9797692992332144		0.191145	-0.560409	1		0.23772223967714043	-0.261055	1		0.1251427804325453	-1.07733	1		0.0244105	-3.39916	1
Tdo2	0.030100171217770977	1.9810844247321953	1.2894555742007835e-05		0.00734086	-0.483357	0.8902981712154219		0.00636908	-0.712855	0.3522396828722215		0.00995109	0.0955382	1		0.00579702	-0.701372	0.8444040671152928		0.024743487232527225	1.496131934131717	0.9797692992332144		0.011134680897387903	0.44569373366219533	1		0.00351067	-1.30344	0.6789950913306814		0	0.10899292920574144	1		0.00271228	-0.829702	1
Gm49969	0.0886095	1.7395055456332669	1.297604973517612e-05		0.023708987375960985	-0.548648	0.6094866595945138		0.031296350471510345	-0.0205892	1		0.018565469795942882	-0.892424	0.23269641303312982		0.018916602537227815	-0.779875	0.7225982777452764		0.0641081	1.0766594635125313	1		0.0352598	0.22672002255321289	1		0.0461402	0.5947718121676671	0.7615957923473403		0	-1.62335	1		0.00271228	-2.56498	1
1700109K24Rik	0.0172484	2.313659763819066	1.3361980337474688e-05		0.00565444	0.42820520804480555	0.9457605653410784		0.00208642	-1.33287	0.0612176		0.0025249	-0.946662	0.7688997925158898		0.000610213	-2.46908	0.20536354500130463		0.010122335686033865	1.3125319957923285	1		0.0092789	1.2754525943768549	1		0.00300914	-0.439335	1		0.010428565036045442	2.1515533914337865	1		0	-0.799955	1
A930001M01Rik	0.38419993824031273	1.6430794580779309	1.3361980337474688e-05		0.12529059019179384	-0.277389	0.9457605653410784		0.10432116823836782	-0.598285	0.22113337589394416		0.1269878134042493	-0.22451	1		0.11258429574575908	-0.388116	0.979334		0.3295382617786581	1.2401834997977426	0.9797692992332144		0.1428950715164781	-0.000403843	1		0.12788854666175276	-0.180927	1		0.073	-0.809316	1		0.00542455	-4.16863	1
Gm42477	1.0420070508084538	1.6266695027100964	1.3732676602184085e-05		0.3437307165594344	-0.272374	0.9457605653410784		0.31988164534564784	-0.394956	0.6054555015551377		0.3560114488070007	-0.182922	1		0.3380579937298132	-0.245308	1		0.7288081693944383	0.9145607698218668	1		0.5994169883093822	0.613989	1		0.14092816318412754	-1.53671	0.16414127775387904		0.23985699582904516	-0.675617	1		0.013561385944242128	-4.62034	1
Plcd4	0.029423762875798596	2.018203880292895	1.4588593031831605e-05		0.00823367	-0.19141	1		0.00472191	-1.1411	0.0407088		0.00683209	-0.473341	1		0.0048817	-0.886162	0.7689950704592606		0.017995263441837984	1.0963289485480336	1		0.022269361794775806	1.426775010743512	1		0.011535	0.4160276103727911	1		0.020857130072090883	1.7626681800109116	1		0.00271228	-0.769581	1
Gm26952	0.00879331	2.916544172537484	1.4727011734243056e-05		0.00128961	-0.555925	0.9642408007785861		0.00208642	0.33171258700292405	0.9054375031500957		0.000594095	-1.51045	0.556467		0.000305106	-1.70137	0.7133520057742886		0.0011247	0.2811190431608672	1		0	-0.00517587	1		0	-1.95123	0.8214642092154185		0	2.490863564549385	1		0.00271228	1.5699946181823154	1
Gm36198	0.2560205574365464	1.6275740372596579	1.4888488472922945e-05		0.0806502	-0.358792	0.9278342510732838		0.0700599	-0.599266	0.2636097982174272		0.0862923	-0.20506	1		0.0677336	-0.557144	0.8419820298506836		0.22269138509274503	1.250550222447445	0.9797692992332144		0.059385	-0.676692	1		0.1253809280997576	0.39803566828223014	0.9489055242279134		0.0625714	-0.428464	1		0.00813683	-3.17995	1
Gm13175	0.0304384	1.9360969699588857	1.4976184990321047e-05		0.013590507407977636	0.6983774764443345	0.2846238122823626		0.0056004	-0.987852	0.0739106		0.0056439	-0.905663	0.4329884338644276		0.00244085	-1.95202	0.13236518930681962		0.014621151546493362	0.6887770120741132	1		0.018557801495646505	1.0640216388873487	1		0.00351067	-1.35392	0.6000215124671302		0.010428565036045442	1.0635824695157945	1		0	-1.88337	1
Gm45820	0.0473486	1.7682677343999362	1.4994852590353773e-05		0.0156737	-0.120138	1		0.012957787212765687	-0.46265	0.6234164078138151		0.0130701	-0.410878	1		0.010373620746221704	-0.702006	0.7773676781404293		0.0258682	0.7085402668955423	1		0.014846241196517205	-0.00760261	1		0.016550282509168002	0.025804687220049694	1		0	-0.700757	1		0	-2.64365	1
Gm31763	0.5248928733705681	1.6332157678163508	1.5014099719677191e-05		0.1904655052796866	-0.0808649	1		0.15549344655318825	-0.452832	0.4868618124774086		0.15996008776184387	-0.37271	1		0.12906004634269944	-0.66726	0.7505570879667977		0.4228886908831926	1.1356894101257868	0.9797692992332144		0.1466066318156074	-0.42696	1		0.15045711371970913	-0.41553	1		0.0417143	-1.94614	1		0.010849108755393702	-3.88903	1
Gm38134	0.3229849832918122	1.6459370408128589	1.5078230879726899e-05		0.11487450787181097	-0.106849	1		0.10377210945816588	-0.292661	0.7638076686649775		0.0952037	-0.4171	0.9936495120048627		0.0692592	-0.86327	0.6123226275700571		0.24968428025550202	1.0854911349879763	1		0.092789	-0.36584	1		0.0822499	-0.579437	1		0.073	-0.556508	1		0.00542455	-3.91609	1
Gm5577	0.028747354533826215	1.9498475878953956	1.545804010034686e-05		0.00753926	-0.379801	0.9457605653410784		0.00691814	-0.517776	0.6473319385035413		0.00742619	-0.355504	1		0.00396638	-1.19808	0.577297		0.0202447	1.2476336214558037	1		0.014846241196517205	0.860415	1		0.00952895	0.11588003152189685	1		0	0.15155339143378654	1		0.00271228	-0.787016	1
Gm39318	0.018601229404240492	2.1719986145954744	1.6052913449018578e-05		0.00624965	0.33121707772988884	0.9572455265311492		0.00252567	-1.26852	0.046359324669060294		0.00401014	-0.454532	1		0.00274596	-0.888457	0.8101207526462779		0.013496447581378487	1.496131934131717	1		0.00556734	0.4617894198510273	1		0.000501524	-2.4993	0.22446024006131482		0	0.9353448417207115	1		0	-1.00755	1
1700108J01Rik	0.019954046088185254	2.1330875181772457	1.62078233667199e-05		0.00367043	-0.838644	0.42035331369194145		0.00516115	-0.216986	0.9425380529599912		0.00386162	-0.662454	0.9873423267467214		0.00366128	-0.62242	0.9269531662992607		0.012371743616263612	1.2373976657315486	1		0.00556734	0.33185911580589345	1		0.00802438	0.5659129521569453	1		0	0.8073372293446397	1		0	-1.13556	1
Gm26630	0.0213069	2.0406412694126503	1.6537101168458916e-05		0.00932487	0.7746243508198987	0.2523036473597219		0.00318454	-1.22918	0.033369513898537914		0.00490128	-0.463145	1		0.00244085	-1.34828	0.5448086181969843		0.00337411	-0.566878	1		0.00742312	0.4969601981198588	1		0.00100305	-2.19839	0.22747015337500184		0	0.6465144350095802	1		0	-1.29638	1
Gm48321	0.015895596036350965	2.3820467387993167	1.695580585236004e-05		0.00476164	0.30692458141105217	0.9873670243337859		0.00164718	-1.51244	0.0359221		0.00267343	-0.674649	1		0.00213575	-0.838875	0.8796769493254596		0.011247	1.6336354578816517	1		0.00185578	-0.17995	1		0.00150457	-1.10651	1		0	1.306438993411958	1		0	-0.636456	1
Gm14508	0.1281793808037663	1.6514942496157894	1.6965051045841342e-05		0.051386	0.13867810136953818	1		0.024707645109087115	-1.17291	0.00160747		0.0451512	-0.105297	1		0.044850654402782075	-0.0998176	1		0.0854775	0.876786	1		0.057529184636504166	0.307051	1		0.0250762	-0.950377	0.7659157017005871		0.010428565036045442	-1.22213	1		0	-4.16586	1
Gm17571	0.0341586	1.8522293590557712	1.7270718213517826e-05		0.0131937	0.2809821502204297	0.9567293115069778		0.00812607	-0.628873	0.39570327241493314		0.00772324	-0.662015	0.8253204837422778		0.00427149	-1.42675	0.36991959464410745		0.0281176	1.389216730215205	0.9862338045678373		0.011134680897387903	0.16357858626269728	1		0.00501524	-1.11629	0.7670043292423196		0.010428565036045442	0.8348179657667467	1		0	-2.11154	1
Gm16133	0.011498941813530486	2.5043433254281755	1.7270718213517826e-05		0.00307522	0.19471507782502684	1		0.00109812	-1.51535	0.0702608		0.00133671	-1.11084	0.7123826149548471		0.000915319	-1.32286	0.705387		0.00899763	1.903556249300686	0.9862338045678373		0.00556734	1.3953620581120516	1		0.00200609	-0.214269	1		0	1.8487571567246208	1		0	-0.0941381	1
Gm50237	0.041937317202287654	1.8986222645402222	1.7747888408065455e-05		0.00694405	-1.23045	0.00922035		0.026245009693652534	1.4488961263732634	1.755387317021522e-05		0.00267343	-2.54015	3.0636530138642346e-06		0.00183064	-2.81709	0.00743683		0.023618783267412354	0.8620516668458693	1		0.016702021346081855	0.4245084037715685	1		0.00551676	-1.25261	0.6724998790527149		0	-0.427638	1		0	-2.37053	1
2010103J01Rik	0.0077787	2.8590939003535842	1.782159366917015e-05		0.00218242	0.6402745218807677	0.9455071295329556		0.000658871	-1.38316	0.2567149811635908		0.00103967	-0.606103	1		0	-2.58589	0.44854339867120974		0.0011247	0.4208438068274791	1		0	0.13232765227825638	1		0	-1.81373	0.765623		0	2.6283670882993198	1		0	0.685472	1
Gm9821	0.023674291969033354	1.9751204020142659	1.7866537925870942e-05		0.00565444	-0.525572	0.8425113905293751		0.00768682	0.055909	1		0.00415867	-0.950939	0.43704263002367544		0.00213575	-1.72885	0.26570271903876097		0.00787293	0.2536383067387593	1		0.012990461046952553	0.9893696984362146	1		0.0120366	0.7828198344096631	0.7080962849503364		0.010428565036045442	1.4531086425539677	1		0	-1.4951	1
Gm27201	0.6916275296667601	1.613352640231708	1.7866537925870942e-05		0.2554420187995797	-0.0672403	1		0.21885482978849163	-0.352994	0.6862782085638708		0.2107552131235436	-0.391282	0.9936495120048627		0.15896048261122084	-0.787448	0.6490073444456081		0.5252367517086461	1.028874751722614	1		0.28207858273382685	0.10231092319751323	1		0.1685119673660742	-0.675927	0.9861520310826992		0.1251427804325453	-0.979987	1		0.010849108755393702	-4.30261	1
Gm44864	0.010146125129585723	2.765355733676757	1.907450351452068e-05		0.00178561	-0.364712	1		0.00142755	-0.715735	0.754514		0.00103967	-1.08764	0.9142891894373101		0.000305106	-2.00093	0.5929048491153026		0.00674822	1.8820230877510449	1		0	-0.300632	1		0.00250762	0.4301949422993854	1		0	2.195407681023215	1		0	0.2525124283261455	1
Hyal4	0.025365312823964307	2.087656088930239	1.9141277053635037e-05		0.00853127	0.24534115089499497	0.9873670243337859		0.00417285	-1.03897	0.11644209291214386		0.00668357	-0.200111	1		0.00274596	-1.41236	0.5521740948988442		0.013496447581378487	0.9650075850381112	1		0.00742312	0.2789973014202669	1		0.00250762	-1.39869	0.7261798516087858		0	0.4319698754958168	1		0	-1.51093	1
Defb42	0.0358496	1.8631079779272834	1.9261458075832973e-05		0.011110487807981717	-0.150571	1		0.00878494	-0.567452	0.5040024517592104		0.010842234360830642	-0.168575	1		0.00640724	-0.913059	0.6803083086165399		0.017995263441837984	0.6801432637403089	1		0.014846241196517205	0.4710509897085977	1		0.00902743	-0.362816	1		0	-0.229614	1		0	-2.17251	1
AC154200.1	0.0848892	1.6893752192606963	1.992562506852975e-05		0.0370019	0.3569456874773387	0.8847532623952642		0.017789504478542724	-0.99829	0.016337843953618564		0.025694610197584948	-0.330057	1		0.0186115	-0.78009	0.7088659873787447		0.0517364	0.782597	1		0.031548262542599056	0.0954011	1		0.019057901071163157	-0.707574	1		0.020857130072090883	-0.012922	1		0.00271228	-2.54206	1
Gm26873	0.042275521373273846	1.7849076558195458	2.0468399758226346e-05		0.016467330143972902	0.22478241568437873	0.9816378733691982		0.00955362	-0.780326	0.15858887582392256		0.012327471944506074	-0.302849	1		0.00854298	-0.804016	0.7379462512863851		0.021369375337182604	0.6169863290061031	1		0.014846241196517205	0.17022426003678603	1		0.0085259	-0.750936	0.9972273648381924		0	-0.525438	1		0	-2.46833	1
Myo1d	1.0551970134769153	1.6029095960355524	2.0529743892746142e-05		0.491639	0.40253226053883195	0.7247504834803181		0.20446948974720092	-1.21054	0.000249726		0.36447730303395065	-0.186412	1		0.27184988484951583	-0.622307	0.7773676781404293		0.7535516566269655	0.9264024254737389	1		0.5084837609807142	0.3348492625663232	1		0.17904396532645386	-1.22231	0.4124145533725928		0.2294284307929997	-0.773972	1		0.016273663133090553	-4.43465	1
E430002N23Rik	0.011837145984516677	2.2959577620856075	2.0928039637216635e-05		0.00327363	0.0597855	1		0.00197661	-0.817056	0.45943723974768247		0.00193081	-0.771267	0.9578921679988435		0.00152553	-0.901396	0.8086395739582329		0.00562352	1.0810944348528722	1		0.00556734	1.2063282337220338	1		0.00200609	-0.405091	1		0	1.6648929643244346	1		0	-0.278002	1
Kcnrg	1.0589172593577634	1.5993499055355416	2.1148458878733695e-05		0.38985908111935846	-0.0884719	1		0.2706859786395544	-0.74557	0.0627648		0.3937364834323566	-0.0611048	1		0.3597205546998644	-0.1966	1		0.8851420205454058	1.1621188014536092	0.9797692992332144		0.39156961155814124	-0.0548345	1		0.16048758796768975	-1.39148	0.2586351432223567		0.1251427804325453	-1.60597	1		0.016273663133090553	-4.44253	1
Ccdc73	0.3371895584732322	1.6207269377155258	2.1651390228763955e-05		0.1303498301757855	0.031564675365989725	1		0.0992698	-0.476103	0.44848502579372307		0.10218434575686962	-0.393436	1		0.0729205	-0.871461	0.6000198003481804		0.2193172731974004	0.8044545342553411	1		0.0853659	-0.56764	1		0.10632302702859445	-0.280328	1		0.0417143	-1.31743	1		0.0732315	-0.767701	1
Mettl21c	0.041937317202287654	1.8383442526161131	2.1903003442161236e-05		0.0134913	-0.103382	1		0.00966343	-0.697985	0.30312144215005365		0.012030424427770987	-0.282182	1		0.00793277	-0.857807	0.7254448841271642		0.0337411	1.335842229501707	0.9923070469855888		0.0092789	-0.370173	1		0.011535	-0.264392	1		0	-0.473171	1		0.00271228	-1.41326	1
Cfap157	0.01319	2.59606	2.2237207760992388e-05		0.00287682	-0.120787	1		0.00153736	-1.15809	0.2879616925700011		0.00103967	-1.6061	0.2844566464953317		0.00183064	-0.613116	1		0.00449882	0.8572306262997573	1		0.00556734	1.257858534362117	1		0.00451371	0.7146483317680836	0.9844822207124776		0	1.7150787214926515	1		0.00271228	0.7850075091531661	1
Abi3bp	0.031453	1.9454164760191635	2.2237207760992388e-05		0.00833287	-0.36552	0.9457605653410784		0.00845551	-0.32515	0.8287304401045674		0.00415867	-1.42108	0.0362477		0.00396638	-1.33517	0.49532859144932023		0.0337411	1.8653657437974367	0.9797692992332144		0.00556734	-0.464607	1		0.016048758796768973	0.7538497819062151	0.6931373404162945		0	0.019557845623796588	1		0.013561385944242128	0.6814699050447555	1
Gm26781	0.018939433575226684	2.0496882387312185	2.276424457411156e-05		0.00664645	0.2922315837392899	0.9714914260680805		0.0037336	-0.765775	0.3556114327358985		0.00341605	-0.840114	0.7259019527828123		0.00305106	-0.863428	0.7966823025203948		0.011247	1.1190622850518936	1		0.00742312	0.6746458155909201	1		0.00250762	-1.00136	0.9375934477869029		0	0.821012	1		0	-1.12188	1
Raver2	0.029423762875798596	1.9262080962121217	2.3190847598452017e-05		0.012102495647980086	0.4998	0.7462030558305185		0.00801626	-0.31893	0.8292964825334035		0.00430719	-1.27963	0.073773		0.00244085	-1.90996	0.15122300736307887		0.0168706	0.9327994493821032	1		0.0092789	0.21055281958375982	1		0.00300914	-1.50888	0.4860383245578193		0	0.10062945627111475	1		0	-1.84227	1
Gbx1	0.00913151	2.8315080686816847	2.3456410621634636e-05		0.00158721	-0.329257	1		0.00153736	-0.361626	0.917964		0.000445571	-1.96565	0.23269641303312982		0.000305106	-1.80829	0.6765312528335888		0.00449882	1.5593257606189104	1		0.00371156	1.515656291829763	1		0.00150457	0.00569711	1		0	2.3855105644031562	1		0	0.4426153117060885	1
Gm19466	0.0456576	1.7701477065914126	2.3742340118103685e-05		0.017955341903970454	0.22857852969131098	0.9814471056019248		0.0113106	-0.636054	0.3425358101771132		0.010990758119198186	-0.635206	0.8027730354829516		0.00701745	-1.21816	0.4511254666374096		0.030367007058101594	0.9970996121977374	1		0.020413581645211155	0.46936263955582813	1		0.0120366	-0.384517	1		0.020857130072090883	0.9428006466397587	1		0	-2.59003	1
Gm45510	0.0179248	2.088725147920165	2.401244720819627e-05		0.00456324	-0.29994	0.9873670243337859		0.00395322	-0.539056	0.6875500324519657		0.00534686	0.0183879	1		0.00183064	-1.43389	0.5486120875234217		0.00562352	0.31859374857952893	1		0.011134680897387903	1.2843307457233069	1		0.00250762	-0.891733	1		0	0.927927	1		0.00271228	-0.00755041	1
Ypel1	0.11194558059642915	1.6406664987441895	2.433056469665109e-05		0.0422595	0.00470026	1		0.033822	-0.409716	0.6610436096108349		0.035794225766577877	-0.282374	1		0.025323838880482397	-0.777537	0.6803083086165399		0.0596093	0.5377556777965102	1		0.0556734	0.4503827380184129	1		0.022067043345557338	-0.944418	0.7812651447582577		0.010428565036045442	-1.03555	1		0.010849108755393702	-1.65367	1
Gm13782	0.015557391865364775	2.438260774751888	2.468857624606222e-05		0.00367043	-0.115353	1		0.00230605	-0.906932	0.4174745137330347		0.0025249	-0.685537	1		0.00122043	-1.47602	0.6702381212286029		0.010122335686033865	1.5593257606189104	1		0.012990461046952553	1.951755406636436	1		0.000501524	-2.05659	0.6399723381792155		0	1.3753863471294494	1		0	-0.567509	1
4930556N13Rik	0.11160737642544295	1.6669200988680997	2.469798220076479e-05		0.0313474	-0.531592	0.6161454922943219		0.0429364	0.0692525	1		0.026585752747790205	-0.749369	0.45342506721927994		0.025323838880482397	-0.751232	0.7249586716165736		0.0708563	0.8186639619271756	1		0.0482503	0.27250531032651715	1		0.0511554	0.33464563633660926	1		0.0417143	0.314154	1		0.00271228	-2.95357	1
1700007J10Rik	0.019954046088185254	2.1330875181772457	2.5270965069903837e-05		0.00545604	-0.122626	1		0.00395322	-0.685605	0.5247900206522534		0.00430719	-0.486992	1		0.00152553	-1.78753	0.3984097374401795		0.0168706	1.6814350367329443	0.9797692992332144		0.00742312	0.6607066246330469	1		0.00401219	-0.40934	1		0	0.8073372293446397	1		0	-1.13556	1
Zfp750	0.019277637746212873	2.122397239926789	2.5270965069903837e-05		0.00545604	-0.0664097	1		0.00417285	-0.542542	0.708562		0.00371309	-0.677589	0.9760962066115878		0.00152553	-1.74509	0.39886312824802866		0.012371743616263612	1.2811190431608663	1		0.00556734	0.3738823307015995	1		0.00551676	0.0707921	1		0	0.8487571567246208	1		0	-1.09414	1
Gm43732	0.011160737642544296	2.548679793483264	2.5767477705524446e-05		0.00337283	0.49392309621230623	0.9457605653410784		0.00142755	-1.03766	0.3692221695492949		0.000594095	-2.11084	0.0658173		0.000610213	-1.679	0.6203397380590324		0.00787293	1.7956922159906252	1		0.00556734	1.4693626395558281	1		0.000501524	-1.50675	0.9047345134317485		0	1.92055	1		0	-0.0223474	1
Cd27	0.36424589215212744	1.6075348780411827	2.5867763293152975e-05		0.1311434364477842	-0.123744	1		0.10860382672394292	-0.466266	0.46142935097397536		0.1217894818613853	-0.237919	1		0.11594046716365435	-0.289612	1		0.2800512873136036	1.0449679314780205	1		0.11691414942257299	-0.240102	1		0.0656996	-1.12189	0.5245439024958782		0.010428565036045442	-2.76195	1		0.00271228	-4.70484	1
Gm10701	0.038555275492425746	1.8372217198760783	2.60307046903869e-05		0.011804893295980575	-0.200145	1		0.0105419	-0.397956	0.7636256610071896		0.00980257	-0.484519	1		0.00823788	-0.67578	0.8350333301458103		0.029242303092986723	1.251019436295186	1		0.012990461046952553	0.1719395081771138	1		0.00752286	-0.74919	1		0.010428565036045442	0.6495613105684441	1		0.00542455	-0.705318	1
Gm48342	0.010822533471558104	2.621088289011313	2.6158150573216794e-05		0.00218242	-0.241081	1		0.00142755	-0.932052	0.4823543358603219		0.00133671	-0.931294	0.9789103576191474		0.00183064	-0.297914	1		0.00674822	1.6845770235448283	1		0	-0.484344	1		0.00100305	-0.813731	1		0.010428565036045442	3.027463043709143	1		0	0.0688005	1
Gm17545	0.14475138518208966	1.6210882890113134	2.7733267386103862e-05		0.054262828847910706	-0.0301825	1		0.043814890660114486	-0.425674	0.6249995691072482		0.046042365093938345	-0.309939	1		0.029900436268521385	-0.933818	0.5831327065080687		0.12596684409286588	1.2502217060891319	0.9797692992332144		0.031548262542599056	-0.735569	1		0.0366112	-0.600515	1		0.020857130072090883	-0.83543	1		0.00271228	-3.36401	1
Mfsd4a	0.4362833805721861	1.5953649983221028	2.7822724727399135e-05		0.16259008497573246	-0.0689708	1		0.12529521364208177	-0.545066	0.30768233216493746		0.13649333393977206	-0.363049	1		0.10861791134279196	-0.679256	0.7417153011423092		0.30479477454613085	0.88961	1		0.18186645465733575	0.12481801459049136	1		0.15747844569329555	-0.0982322	1		0.0417143	-1.70911	1		0.097642	-0.756844	1
Ackr4	0.0706847	1.705977186597826	2.7822724727399135e-05		0.0230146	-0.216189	0.9873670243337859		0.022072162964117823	-0.28521	0.8257681005207537		0.021238897446558658	-0.326643	1		0.014340005149188827	-0.878676	0.657685		0.0596093	1.283587298751617	0.9797692992332144		0.018557801495646505	-0.345271	1		0.016550282509168002	-0.626732	1		0	-1.32428	1		0	-3.26717	1
4933424G05Rik	0.0270563	2.075241918556543	2.7845340103394837e-05		0.00644805	-0.436456	0.9457605653410784		0.0074672	-0.153651	1		0.00415867	-1.0809	0.3698829478911583		0.00427149	-0.90654	0.7886369357733065		0.023618783267412354	1.6648863918660917	0.9797692992332144		0.012990461046952553	0.8692932464444638	1		0.00501524	-0.602227	1		0.010428565036045442	1.335585339071475	1		0	-1.61221	1
Stard5	0.7129343924388901	1.5839635520689292	2.829852167621915e-05		0.25187079057558553	-0.185446	0.9873670243337859		0.21698802993580507	-0.452494	0.4803979405918788		0.25055958036604514	-0.17424	1		0.2187613551482636	-0.36796	0.9942545067104165		0.4487568820808347	0.7218343257280446	1		0.33218464677207243	0.2727997679335996	1		0.16449977766688198	-0.78106	0.8857524144340403		0.20857130072090882	-0.35392	1		0.0623824	-2.10374	1
Sspnos	0.00913151	2.8315080686816847	2.865619619715572e-05		0.000694405	-1.63536	0.18672784447959734		0.000549059	-1.89506	0.0670491		0.00193081	0.0711914	1		0.00244085	0.5136412274017701	1		0.00562352	1.8440552375520234	1		0.00742312	2.2950571523163656	1		0.000501524	-1.03612	1		0	2.3855105644031562	1		0	0.4426153117060885	1
Gm41077	0.0270563	1.9779447172016278	2.9244613920573378e-05		0.00833287	-0.0461479	1		0.00713776	-0.32787	0.8373695476337912		0.00504981	-0.857424	0.6436332969860108		0.00335617	-1.31804	0.5448086181969843		0.024743487232527225	1.6571238108040216	0.9797692992332144		0.00185578	-1.23224	1		0.00601828	-0.425569	1		0	0.2591332786336018	1		0	-1.68376	1
Nr6a1	4.788971061164461	1.5700196412781156	2.9280013154038213e-05		1.9351096934848158	0.0655814	1		1.2548189362735043	-0.730617	0.0687031		1.63881	-0.233734	1		1.2710736479046947	-0.605131	0.7399337450305382		3.886976903437004	1.0917906990976443	1		1.8873284121072496	0.00982524	1		1.3139921264854597	-0.536647	1		0.9907136784243169	-0.920562	1		0.0732315	-4.64252	1
Fgfr2	2.9007771745485584	1.5705851705654614	2.928323149964645e-05		1.036152188878295	-0.178188	0.9873670243337859		0.9495422544812279	-0.333771	0.7177796423852343		0.8559424194721507	-0.485251	0.867122		0.7285943041758067	-0.689121	0.6643157160241636		2.168429244741477	0.9676774616792394	1		1.041092663905769	-0.125563	1		1.2327452850768168	0.12733342858573465	1		0.6882852923789992	-0.715465	1		0.127477	-3.14016	1
AU040972	0.00946972	2.697709570614226	2.9300467940907144e-05		0.00158721	-0.502093	0.9642329018657299		0.00120793	-0.916753	0.5793549987603183		0.00103967	-1.02793	0.9486286447707283		0.000610213	-1.34197	0.7740545464026491		0.00787293	2.1537397366846385	0.9797692992332144		0.00185578	0.772432	1		0.00250762	0.488298	1		0	2.2498554650455906	1		0	0.3069602123485229	1
Alas2	0.0355114	1.8321268527533148	2.978905947076069e-05		0.013888109759977146	0.2850229112039715	0.9535872665645023		0.0101027	-0.331096	0.8137439592584189		0.006238	-1.08127	0.16531145886788584		0.00518681	-1.22676	0.5094118679396599		0.0224941	0.9884451468871989	1		0.00371156	-1.144	1		0.00902743	-0.373158	1		0.010428565036045442	0.7637682144072402	1		0	-2.18242	1
Star	0.12378272658094581	1.628181586757666	2.9794389572076587e-05		0.0488068	0.0788627	1		0.0352496	-0.527826	0.4257658901071149		0.036091273283312963	-0.450277	0.9936495120048627		0.026239158358090195	-0.887112	0.6215896928591103		0.0899763	0.9869119957961656	1		0.0668081	0.5534433220199753	1		0.0320975	-0.555128	1		0.0312857	-0.188403	1		0.00542455	-2.54719	1
Gm16055	0.029085558704812407	1.9265282611101062	3.039253156592673e-05		0.011110487807981717	0.33932899073815204	0.9457605653410784		0.00647889	-0.673394	0.40016570943361246		0.00445571	-1.20939	0.1262407544978346		0.00213575	-2.06702	0.12131541509991181		0.0314917	1.8668471024252655	0.9797692992332144		0.00556734	-0.365923	1		0.00802438	-0.168105	1		0	0.11740516902194109	1		0	-1.82549	1
Cxcl17	0.13731089342039346	1.620113824238778	3.128682197386166e-05		0.053568423359911854	0.0485907	1		0.0339318	-0.783384	0.0808264		0.049458411536391834	-0.096249	1		0.0378332	-0.497036	0.900459		0.1124703965114874	1.158374419899625	0.9923070469855888		0.0408272	-0.30218	1		0.0235716	-1.16737	0.534238		0.020857130072090883	-0.760129	1		0.00813683	-2.28722	1
Gm45732	0.0341586	1.8613893583412464	3.239225386797359e-05		0.00872967	-0.512773	0.8193011840272055		0.00702795	-0.868586	0.14691019949061465		0.010842234360830642	-0.0865816	1		0.00579702	-0.986432	0.6643157160241636		0.0314917	1.5652780951724825	0.9797692992332144		0.00371156	-1.06582	1		0.019559424783562186	0.8604991982315386	0.5130614105429449		0	-0.16171	1		0	-2.10461	1
2310043M15Rik	0.020630454430157638	1.9701755255652564	3.276847323847473e-05		0.00664645	0.0342504	1		0.00472191	-0.583525	0.5888205685349177		0.00460424	-0.571669	0.9936495120048627		0.00213575	-1.53075	0.44135100392413595		0.015745855511608235	1.4030225297402357	1		0.011134680897387903	0.9885921748168078	1		0.00351067	-0.758589	1		0	0.6404399205998956	1		0.00271228	-0.296381	1
Gm26611	0.016572004378323346	2.1849264496968637	3.278412490075529e-05		0.00416643	-0.231463	1		0.00340416	-0.575178	0.7056682423600275		0.00193081	-1.38371	0.19045517189245878		0.00213575	-1.04533	0.7545440856693847		0.014621151546493362	1.7979588229625705	0.9797692992332144		0	-1.38705	1		0.00802438	0.8952205774099049	0.7205022032900988		0	1.1089929292057414	1		0	-0.833902	1
Gm34643	0.0219833	1.9657364603987588	3.2997014142241675e-05		0.00287682	-1.54225	0.00231273		0.011530234384240654	1.0731252778942375	0.014125346065029043		0.00148524	-2.34949	0.000229697		0.000610213	-3.07132	0.016314654407224276		0.015745855511608235	1.3034868561893207	1		0.00742312	0.3953620581120516	1		0.011033521672778669	0.7587409159512548	0.7809173530758887		0	0.546573	1		0.00542455	0.200045	1
Gm2415	0.0466722	1.757035787040511	3.302825836952978e-05		0.018947349743968823	0.2807175957222485	0.9457605653410784		0.00944381	-0.992683	0.037136797956839565		0.013812709528181505	-0.303733	1		0.010373620746221704	-0.689272	0.8061364362530384		0.0371152	1.248842640137111	1		0.014846241196517205	0.00457211	1		0.00601828	-1.40116	0.4717917592860947		0.020857130072090883	0.9010516641668334	1		0	-2.63164	1
Gm15907	0.018601229404240492	2.0525349479939035	3.316314353503316e-05		0.00496004	-0.248337	0.9940876370736492		0.00472191	-0.324923	0.8541930845213166		0.00371309	-0.677589	0.9674424590555549		0.00274596	-0.979128	0.7482806494360095		0.011247	1.1482086307114097	1		0.011134680897387903	1.2027169801696553	1		0.00351067	-0.543465	1		0	0.8487571567246208	1		0	-1.09414	1
Lamb1	0.014204575181420011	2.3552606682858395	3.40416353810735e-05		0.00396803	0.1372295831642667	1		0.00241586	-0.744955	0.5662128019199085		0.00237638	-0.69761	1		0.000915319	-1.73429	0.5774262962724163		0.00674822	1.0884739652184718	1		0.00556734	0.9839358123855861	1		0.00150457	-0.962122	1		0	1.4477948426575002	1		0	-0.4951	1
Gm49521	0.15625032699562014	1.6054378268356522	3.431502681010322e-05		0.0629925	0.0991503	1		0.0456817	-0.503213	0.45954617918726914		0.0464879	-0.437651	0.9936495120048627		0.027459584328233925	-1.18941	0.35506986422080217		0.11809391633706176	1.0236791961202658	1		0.0630965	0.11186354971854229	1		0.050653894952302075	-0.244943	1		0.0312857	-0.542226	1		0.010849108755393702	-2.16253	1
Gm38948	0.24485981979400212	1.5696801818735846	3.4474791619847746e-05		0.0867015	-0.196494	0.9873670243337859		0.0796135	-0.347015	0.7397133966753292		0.0836189	-0.236982	1		0.0732256	-0.417166	0.9608158581039278		0.2024467137206773	1.1256131016315178	0.9923070469855888		0.0872217	-0.110952	1		0.0476448	-1.03655	0.6434114637203024		0.052142825180227205	-0.632579	1		0.00542455	-3.57673	1
Gm30054	0.2678577034210631	1.5698	3.515278951643129e-05		0.10009359105583529	-0.0914113	1		0.0832373	-0.428959	0.5904053364568941		0.090451	-0.256239	1		0.0768868	-0.480645	0.9011132385679351		0.20132200975556244	0.9811580683287158	1		0.10577946852518508	0.0349493	1		0.0576752	-0.888457	0.7972575414297965		0.0834285	-0.175931	1		0	-5.29181	1
Gm28192	0.016572004378323346	2.1616566703740165	3.5239107141772165e-05		0.00476164	0.00207	1		0.00318454	-0.708645	0.5219817232424822		0.00267343	-0.915657	0.717397		0.00152553	-1.49492	0.578798		0.00674822	0.7185243554681655	1		0.014846241196517205	1.8341038179821636	1		0.00451371	0.048765835663360235	1		0.010428565036045442	2.1006294562711147	1		0	-0.850581	1
Itga11	0.030100171217770977	1.947531865021169	3.549652801673793e-05		0.00902727	-0.128606	1		0.00735739	-0.492822	0.6922900779469302		0.00653505	-0.643717	0.9651261344094114		0.0048817	-0.975245	0.7164650824505059		0.013496447581378487	0.603047	1		0.012990461046952553	0.6171534817139639	1		0.011535	0.3249756302448876	1		0	0.0840466	1		0	-1.85885	1
Rec114	0.26819590759204925	1.5629506684879717	3.570924928464701e-05		0.0980104	-0.142401	1		0.0853237	-0.393288	0.6616500640164007		0.0825792	-0.419762	0.9936495120048627		0.0756664	-0.513012	0.8739171728549743		0.18895026613929883	0.8782150776712978	1		0.0742312	-0.479363	1		0.10782759816579154	0.040692535127678564	1		0.020857130072090883	-1.77042	1		0.029835	-1.7099	1
Arg2	0.0317912	1.8537680287559617	3.614242417800209e-05		0.011507290943981065	0.14754195760040467	1		0.00779663	-0.574041	0.5288119163511348		0.00772324	-0.542579	0.9936495120048627		0.00549192	-0.962458	0.6702381212286029		0.019119967406952855	0.9381364810108304	1		0.00742312	-0.223816	1		0.00651981	-0.650232	1		0	-0.0646552	1		0.00542455	-0.415132	1
Rhd	0.0588475	1.7449713182136897	3.654059047708291e-05		0.018252944255969964	-0.268885	0.9772648117076271		0.015703081113775365	-0.530144	0.5219817232424822		0.0184169	-0.220737	1		0.0109838	-0.965406	0.6322294698592195		0.0438635	1.1355669906373862	1		0.046394503739116265	1.2219885778940558	1		0.013039616522374791	-0.667652	1		0.0417143	1.2987650655265375	1		0.00542455	-1.38492	1
1700066B19Rik	0.37236279225579605	1.5807145255520363	3.659155827160241e-05		0.144635	-0.00264667	1		0.0914732	-0.8314	0.0380909		0.12980976481323264	-0.191179	1		0.13119579179045096	-0.153872	1		0.30367007058101597	1.1118402983289282	0.9923070469855888		0.19671269585385295	0.45988468540628613	1		0.0687087	-1.11035	0.5335855972591493		0.1251427804325453	-0.11137	1		0	-5.75802	1
Gm42413	0.09605	1.6355878587064288	3.7029099399636655e-05		0.0315458	-0.272144	0.9590212099709451		0.0307473	-0.309629	0.7855206187405862		0.0300018	-0.326589	1		0.024103412910338667	-0.622691	0.809132		0.0877269	1.3404810636715228	0.9797692992332144		0.024125141944340456	-0.49439	1		0.0265808	-0.447721	1		0.010428565036045442	-0.818992	1		0.00271228	-2.76189	1
Gm17135	0.0649352	1.6923375100554066	3.742189964856054e-05		0.025593802271957886	0.1478286901941921	1		0.014055904773169559	-0.940099	0.0394086		0.0228727	-0.0655824	1		0.016475750596940356	-0.55228	0.8881016889011402		0.0438635	0.944177	1		0.024125141944340456	0.12035501061218135	1		0.00952895	-1.30087	0.5014382118956201		0.010428565036045442	-0.211257	1		0.00271228	-2.15415	1
Gm14011	0.084551	1.62382	3.797959310694377e-05		0.0358115	0.22062977657582028	0.9677858686661381		0.022182	-0.675678	0.20104048733308919		0.0276254	-0.260546	1		0.014950218134260692	-1.15409	0.41577769858527014		0.0843528	1.4666059818285446	0.9797692992332144		0.012990461046952553	-1.13321	1		0.014544187659571882	-1.14461	0.5823275462393117		0.010428565036045442	-0.644651	1		0	-3.58879	1
Gm15938	0.0537745	1.763853708511526	3.8995716421033156e-05		0.021030566207965395	0.21060645059491812	0.9873670243337859		0.011749857896321428	-0.858159	0.10542260819811619		0.015892042145327107	-0.300715	1		0.010678727238757638	-0.855593	0.7088659873787447		0.032616414988331344	0.8506278914755097	1		0.022269361794775806	0.3430531848460099	1		0.00952895	-0.966455	0.863873		0.052142825180227205	1.7087091966169234	1		0	-2.8297	1
Gm10353	0.32095575826589506	1.5801405024510105	4.012537505685839e-05		0.11338649611181342	-0.189734	0.9873670243337859		0.0949872	-0.506333	0.42081820797614394		0.10396663085728014	-0.317834	1		0.0921422	-0.472347	0.9064320395696955		0.2575572080113061	1.0876057144738853	1		0.1725875539095125	0.48724415911953045	1		0.10180931361700317	-0.304536	1		0.13557134546859073	0.21011287633693376	1		0.013561385944242128	-2.95774	1
Slc4a9	0.01319	2.538726319453839	4.077675031345049e-05		0.00208322	-0.745784	0.8544374097819848		0.00208642	-0.713611	0.6984103589909367		0.00207933	-0.643717	1		0.00335617	0.19171313251440836	1		0.00674822	1.3294820647222663	1		0	-0.818763	1		0.00250762	-0.116293	1		0	1.6772766887802666	1		0	-0.265619	1
Gm45187	0.018601229404240492	1.9871589391418798	4.094277057715934e-05		0.00545604	-0.131786	1		0.00439247	-0.512703	0.7004130228139864		0.00579243	0.000802122	1		0.00122043	-2.06443	0.19900336959836065		0.012371743616263612	1.2302378741586821	1		0.00742312	0.6537872106932561	1		0.00200609	-1.29227	0.7662967190663288		0	0.800548	1		0	-1.14235	1
Gm47917	0.019615841917199065	1.982523522149167	4.1172065208934516e-05		0.00624965	0.024790076382714687	1		0.00417285	-0.697119	0.443478		0.00445571	-0.531316	1		0.00305106	-0.967765	0.7249586716165736		0.019119967406952855	1.772972139490542	0.9797692992332144		0.00185578	-0.768137	1		0.00300914	-0.874272	1		0.010428565036045442	1.7279027618502347	1		0	-1.22142	1
Gm26632	0.14441318101110345	1.6002562958022883	4.232963113044526e-05		0.044342750447927036	-0.43441	0.8034870736941205		0.05249	-0.109174	1		0.0401014	-0.557585	0.8477469492313108		0.036002566119240034	-0.666829	0.7773676781404293		0.1034727647905684	0.9402705528113269	1		0.053817624337374866	-0.00298831	1		0.0692103	0.3448222880356595	1		0.052142825180227205	0.15371473272325353	1		0.00271228	-3.37702	1
Gm34280	0.6067382827492263	1.5605494995782987	4.245718773152398e-05		0.2749845732475475	0.2928392940003177	0.9457605653410784		0.17416144508005407	-0.579768	0.2440702111967091		0.19233826708596827	-0.373199	1		0.12936515283523536	-0.945041	0.5305742580428843		0.3396605974646919	0.5279390476920938	1		0.31919418572511987	0.43270070804717053	1		0.11183978786498379	-1.13188	0.4973429699203644		0.260714	0.1696082115911588	1		0.0189859	-3.47675	1
Ccdc146	0.049716013134970045	1.7593474759380943	4.2867025258971145e-05		0.012102495647980086	-0.69847	0.3867697252055984		0.018777810282906208	0.12955119249990332	0.9425380529599912		0.010099615568992928	-0.919405	0.3040577483850767		0.0122043	-0.54062	0.9187911169616932		0.039364638779020585	1.2421906769204485	1		0.014846241196517205	-0.0854775	1		0.021063995920759276	0.305106	1		0	-0.777625	1		0.00542455	-1.13101	1
Gm10578	0.041937317202287654	1.7663744662417828	4.440803682731052e-05		0.0158721	0.1448101719987136	1		0.010322305067796394	-0.650406	0.35162460615312996		0.009357	-0.760826	0.6045366399291219		0.010068514253685773	-0.563085	0.900459		0.032616414988331344	1.22738	1		0.0352598	1.3499190873508846	1		0.00601828	-1.23707	0.6555532498153472		0	-0.528137	1		0	-2.47103	1
Fam83g	0.1065343138606501	1.6087	4.4535175214262044e-05		0.0476164	0.3174311214750958	0.9455071295329556		0.0189974	-1.33809	0.000281948		0.041438128584544515	0.028305637026496022	1		0.027764690820769856	-0.589027	0.8388553417563137		0.0719811	0.8643752219316201	1		0.057529184636504166	0.544363	1		0.017553329933966064	-1.22777	0.4933778927777695		0.020857130072090883	-0.403342	1		0.00813683	-1.93022	1
Olfr112	0.0338204	1.956920905104889	4.45810643614666e-05		0.00624965	-0.992912	0.13836440490814395		0.00856532	-0.421865	0.7636256610071896		0.00267343	-2.17329	0.000416396		0.00366128	-1.54462	0.4292398376535616		0.0224941	1.160528902347278	1		0.00742312	-0.235043	1		0.0471432	2.448696442551996	2.8787354608152094e-06		0.010428565036045442	0.927927	1		0	-2.01866	1
Gm15965	0.14508958935307584	1.5762468916951957	4.484602639645778e-05		0.049104388079919195	-0.276421	0.9553690142901636		0.055454936800395524	-0.0385345	1		0.043665984960057656	-0.445101	0.9936495120048627		0.0363077	-0.681256	0.7612526965638167		0.142837	1.4003581793770024	0.9797692992332144		0.020413581645211155	-1.36379	1		0.030592946456340857	-0.904657	0.7917587258563218		0	-2.46051	1		0	-4.4034	1
Lnx1	0.0449812	1.752012429865391	4.533304474352306e-05		0.018649747391969312	0.3195521897388014	0.9457605653410784		0.010212493311756008	-0.802879	0.1472680637000665		0.011436329394300815	-0.561447	0.9696959612476688		0.00793277	-1.03264	0.6104586310372989		0.026992895162756974	0.833601	1		0.0092789	-0.538211	1		0.0125381	-0.317536	1		0.010428565036045442	0.3628301752623564	1		0.013561385944242128	0.014933603175022014	1
Gm10658	0.11296019310938772	1.62486	4.6522556871027236e-05		0.036009884591940745	-0.339454	0.9457605653410784		0.036128067737287384	-0.32197	0.7728366617493356		0.035794225766577877	-0.312466	1		0.035087246641632236	-0.306852	1		0.0922257	1.1598731318628563	1		0.0296925	-0.455461	1		0.032599	-0.397721	1		0.020857130072090883	-0.475037	1		0.00271228	-3.00383	1
Ceacam2	0.0909769	1.623762423309639	4.6964003288287326e-05		0.0330339	-0.0908594	1		0.028441244814460278	-0.364544	0.7443106848801081		0.0297048	-0.26193	1		0.019221709029763747	-0.890892	0.6313153622951055		0.0652328	0.968172	1		0.024125141944340456	-0.42489	1		0.0255777	-0.432813	1		0.020857130072090883	-0.164026	1		0	-3.6942	1
4930431F10Rik	0.018263	2.007556636093386	4.787259924242817e-05		0.00515844	-0.183564	1		0.0056004	-0.0205892	1		0.0056439	0.00634031	1		0.00152553	-1.75225	0.3701821450274296		0.00449882	-0.039921	1		0	-1.65427	1		0.00100305	-2.00136	0.36000545341391815		0	0.8417707264085141	1		0	-1.10112	1
Gm47207	0.011160737642544296	2.6403102689488316	4.827681209513466e-05		0.00188481	-0.542251	0.9497624065162054		0.000658871	-2.0877	0.018345958871799056		0.00118819	-1.13452	0.8655042956399838		0	-3.23359	0.27651360582380635		0	-1.2511	1		0.00185578	0.5000594367787432	1		0.013039616522374791	2.7605846159349436	0.000329064		0	1.9806688322302017	1		0	0.0377736	1
A330040F15Rik	0.7663706514547083	1.5571834724601026	4.856251316297253e-05		0.18600146999969394	-0.898907	0.015109318898793255		0.4819637972612593	0.999487	0.000771055		0.12817600347118965	-1.41389	0.000529191		0.10739748537264823	-1.57783	0.0526225		0.4645027375924429	0.6429999918704759	1		0.2839343628833915	-0.0833577	1		0.2537709984739094	-0.2621	1		0.2294284307929997	-0.34805	1		0.1166279191204823	-1.35228	1
4732487G21Rik	0.0267181	1.86887	4.955557840378521e-05		0.011705692511980737	0.5729573153920642	0.6072830294393639		0.00625927	-0.638342	0.44940739903073706		0.00504981	-0.928809	0.4265385537813743		0.00213575	-1.98734	0.1309840305099345		0.019119967406952855	1.2113170122614543	1		0.00742312	0.0392182	1		0.00300914	-1.41237	0.6085467799449881		0	0.19540768102321415	1		0.00271228	-0.743028	1
Mtmr7	0.0341586	1.7766317401616112	5.0818139961834176e-05		0.012995302703978615	0.16586021515284166	1		0.00878494	-0.563382	0.5161158872053523		0.00831733	-0.607535	0.9122030427895819		0.00549192	-1.13152	0.5786549747906804		0.0281176	1.327969541388665	1		0.00185578	-1.719	1		0.0100305	-0.20801	1		0.010428565036045442	0.777034	1		0	-2.16919	1
Gm16234	0.014204575181420011	2.128489806438817	5.0818139961834176e-05		0.00396803	-0.0851628	1		0.00318454	-0.471251	0.7636256610071896		0.00267343	-0.696344	0.9936495120048627		0.00152553	-1.29371	0.6483481521125964		0.012371743616263612	1.748898004511683	0.9797692992332144		0.00371156	0.3953620581120516	1		0.00200609	-0.794365	1		0	1.2873301704642532	1		0	-0.655565	1
Gm50295	0.0571565	1.6835223357701308	5.144182569305878e-05		0.020336160719966537	-0.0678005	1		0.013726469505048397	-0.77123	0.14575251040071363		0.0194566	-0.132996	1		0.014340005149188827	-0.573822	0.8739171728549743		0.0483623	1.2750784410035667	0.9862338045678373		0.038971383140857664	0.9672684060077614	1		0.00902743	-1.19613	0.6266987744206346		0.010428565036045442	-0.0345979	1		0	-2.97939	1
Hdgfl3	0.0537745	1.6839793428087084	5.3000570045219525e-05		0.0269826	0.6629813538370852	0.22553398902072486		0.00889475	-1.38869	0.000630979		0.016337613420429737	-0.326941	1		0.00701745	-1.53075	0.20536354500130463		0.039364638779020585	1.0619008696195626	1		0.00742312	-1.11459	1		0.014544187659571882	-0.424116	1		0.010428565036045442	0.0534583	1		0.00271228	-1.88944	1
4930586N03Rik	0.0642588	1.6622699013589344	5.3000570045219525e-05		0.022717	-0.102753	1		0.0202054	-0.315756	0.7900063300818743		0.0170802	-0.570948	0.8786419098844039		0.0195268	-0.302294	1		0.049487	1.1141015407411912	1		0.020413581645211155	-0.113912	1		0.013039616522374791	-0.86448	0.8890651339107343		0.010428565036045442	-0.21963	1		0	-3.16419	1
Rflna	0.0358496	1.7987869969604269	5.303836324851323e-05		0.0101185	-0.391803	0.9457605653410784		0.011530234384240654	-0.138159	0.9925699359661959		0.00816881	-0.696536	0.7845255714860798		0.00793277	-0.652037	0.8582609482135064		0.021369375337182604	0.8738708919875853	1		0.018557801495646505	0.7172901529994142	1		0.0120366	0.00230652	1		0.020857130072090883	1.3128652625713908	1		0	-2.22142	1
Gm37850	0.044642950570177184	1.6933771498181924	5.3251824796211285e-05		0.0214274	0.5716024600341809	0.4267987406056294		0.011859669652361815	-0.586306	0.4101875776145109		0.00995109	-0.826893	0.4115737402164696		0.00610213	-1.44656	0.2565872704523167		0.0337411	1.1232568463552708	1		0.00556734	-1.16291	1		0.00702133	-1.17488	0.6266987744206346		0.010428565036045442	0.3282433637303068	1		0	-2.61709	1
Gm37768	0.5438323069457948	1.5458822294700394	5.455361014551746e-05		0.21338088638364888	-0.0205087	1		0.16658443391326735	-0.478465	0.43279537201664303		0.18758550681820688	-0.242622	1		0.12204259701437299	-0.879386	0.5865856630176957		0.4183898750227331	0.9932091210408847	1		0.20042425615298226	-0.0964793	1		0.17252415706526647	-0.335146	1		0.052142825180227205	-1.80292	1		0.00813683	-4.33115	1
1600010M07Rik	1.3321862295146054	1.533504833331095	5.517875225875695e-05		0.5215977222711417	-0.0381033	1		0.3982872391584843	-0.533995	0.3138526930655766		0.46205741228142644	-0.245022	1		0.39938439872953563	-0.447612	0.8659898850851571		0.9256313632895412	0.8272813648901229	1		0.32104996587468454	-0.730791	1		0.43532258236235843	-0.302789	1		0.13557134546859073	-1.88244	1		0.11120336474278546	-2.23827	1
Gm44759	0.097741	1.5987510905260565	5.6434562412617144e-05		0.033926668127944176	-0.204817	0.9873670243337859		0.027892186034258342	-0.552409	0.39829285411138166		0.030892941740448956	-0.340748	1		0.029290223283449518	-0.382872	1		0.0955998	1.4134700791451995	0.9797692992332144		0.046394503739116265	0.35703393945295137	1		0.029088375319143763	-0.370711	1		0.010428565036045442	-0.873072	1		0.00271228	-2.81597	1
Mast1	0.0453194	1.7243500072541398	5.711926660985265e-05		0.016467330143972902	0.0170253	1		0.0113106	-0.665924	0.31040544762336375		0.011733376911035901	-0.556254	0.9700512542986798		0.012814472686509164	-0.353401	1		0.0281176	0.859268	1		0.00742312	-0.83607	1		0.018054853646365096	0.18626935941329492	1		0.010428565036045442	0.33068653965863515	1		0	-2.61465	1
Gm45345	0.0524216	1.705591902835117	5.7819340395346746e-05		0.0156737	-0.377759	0.9457605653410784		0.015373645845654205	-0.399363	0.732759		0.016931708453899907	-0.202617	1		0.010678727238757638	-0.86443	0.6830149310522242		0.041614046709250334	1.2004751880864761	1		0.024125141944340456	0.44356114636938315	1		0.018556377358764125	-0.00985171	1		0	-0.895195	1		0	-2.83809	1
1700084C06Rik	1.2547374743587678	1.5303042167926981	5.8174702246291644e-05		0.4778501765272137	-0.0963695	1		0.4246420606081772	-0.31328	0.754514		0.4145298096038127	-0.3314	1		0.3157852197746901	-0.719341	0.64244		0.9829912655103998	1.0059180945460295	1		0.4453872358955161	-0.170801	1		0.3580879306529077	-0.509102	1		0.18771417064881793	-1.35756	1		0.0379719	-3.64182	1
1500004A13Rik	0.8756105986832479	1.5343202581277215	5.891169007717712e-05		0.31347447743948414	-0.21239	0.9816378733691982		0.2740901430768064	-0.451	0.48348026555866014		0.3050677996869334	-0.236436	1		0.252933	-0.503882	0.8739171728549743		0.7378058011153573	1.1203254705425119	0.9823324946927714		0.32847308647294315	-0.0847288	1		0.30542794085100955	-0.202756	1		0.10428565036045441	-1.62427	1		0.027122771888484255	-3.56716	1
Gm13807	0.019277637746212873	2.046945011497323	5.8947933598390175e-05		0.00674565	0.2833399771654914	0.9816378733691982		0.00439247	-0.521018	0.7308287045733262		0.0025249	-1.33031	0.17691293411639641		0.00183064	-1.57209	0.5052753085782893		0.017995263441837984	1.7615930773600512	0.9797692992332144		0.00556734	0.31811905917959127	1		0.00250762	-1.02924	0.9673469449287776		0.010428565036045442	1.800548063682001	1		0	-1.1491	1
Megf11	0.17079310634802633	1.5536890037257272	5.8947933598390175e-05		0.0638853	-0.107142	1		0.063581	-0.112143	0.9939897230226301		0.046784983885776066	-0.622889	0.6699019098654585		0.0317311	-1.15025	0.37478720806053767		0.10684687668591303	0.6973901423788211	1		0.14103929136691343	1.1032687453315102	1		0.0516569	-0.392515	1		0.0938571	0.6140117953222508	1		0.00542455	-3.07001	1
Gm45669	0.046334	1.715592275474548	6.104454997316303e-05		0.016963334063972088	0.022720509192511784	1		0.0120793	-0.598313	0.4092753321016861		0.015594994628592021	-0.121806	1		0.00976341	-0.802028	0.7417153011423092		0.0348658	1.1335618547470085	1		0.020413581645211155	0.40501222814577087	1		0.00351067	-2.13566	0.0946362		0.020857130072090883	0.8794288524670382	1		0	-2.65319	1
BC055324	0.12547374743587678	1.5725633292046566	6.177940888740784e-05		0.0567428	0.300619	0.9457605653410784		0.027343127254056406	-1.04065	0.00750291		0.0417352	-0.278759	1		0.027459584328233925	-0.885455	0.6215896928591103		0.0742305	0.6348664264212549	1		0.0649523	0.44842330186346535	1		0.0461402	-0.0802082	1		0.0834285	0.9221844764297376	1		0.013561385944242128	-1.60813	1
Gm15775	0.011498941813530486	2.290939687318982	6.355089603507086e-05		0.00277762	-0.203644	1		0.00274529	-0.21092	0.981267		0.00178229	-0.850168	0.9127782006314452		0.00122043	-1.13844	0.7418883940362125		0.00337411	0.5090709898392145	1		0.00556734	1.2448023815366698	1		0.00200609	-0.366272	1		0	1.702367669743098	1		0	-0.240528	1
Gm14540	0.018263	1.9520615235016825	6.486697799193986e-05		0.00664645	0.26227836163766227	0.9873670243337859		0.00505134	-0.264742	0.8982422913710728		0.0025249	-1.32297	0.12255641137534115		0.00213575	-1.3655	0.5659409258346513		0.00787293	0.6169863290061022	1		0.00556734	0.32497273022065354	1		0.00551676	0.019910972991175946	1		0	0.800548	1		0	-1.14235	1
Lrrtm2	0.0128518	2.1396303640440166	6.486697799193986e-05		0.00376963	0.0206857	1		0.00252567	-0.683554	0.5847394580210822		0.00148524	-1.40744	0.19677907511492415		0.00183064	-0.905072	0.8214197100879513		0.00787293	1.2811190431608672	1		0.00742312	1.3058639072729488	1		0.00501524	0.5639068868869463	1		0	1.437225600947312	1		0	-0.50567	1
Gm20721	0.3473356836028179	1.5423030399988586	6.506006668254834e-05		0.1324330466397821	-0.0813784	1		0.11760839071925466	-0.300275	0.7636256610071896		0.0941641	-0.651381	0.5528236353845679		0.0616315	-1.23435	0.24934589293707526		0.2024467137206773	0.5760176433670332	1		0.17073177375994786	0.32482499635734374	1		0.19208358184882865	0.5132155290672826	0.7871056419064758		0.0625714	-0.936127	1		0.11934019630933072	-0.183449	1
Gm33280	0.012513554326489058	2.272080660067666	6.534620571297245e-05		0.00307522	-0.189949	1		0.00285511	-0.310096	0.9040227329654179		0.0025249	-0.463145	1		0.000915319	-1.60974	0.5882593420244807		0.00787293	1.4208438068274791	1		0.00556734	1.1084809103238902	1		0	-2.87262	0.22882070174031685		0	1.5694733992457524	1		0	-0.373422	1
Nnat	0.12310631823897344	1.5617519778782638	6.552463913203165e-05		0.049699592783918216	0.053095280194109584	1		0.038543926370175896	-0.423278	0.62784		0.0350516	-0.550727	0.8549777027399288		0.030510649253593248	-0.706417	0.7429732753975441		0.091101	0.958866	1		0.053817624337374866	0.19959452235683095	1		0.039620373279523405	-0.288816	1		0.020857130072090883	-0.648791	1		0.00813683	-2.17582	1
Tmem253	0.010146125129585723	2.3716918851904802	6.616949880036497e-05		0.00178561	-0.691213	0.8847532623952642		0.00208642	-0.399101	0.864487		0.00207933	-0.346331	1		0.00122043	-0.896235	0.8626469202947393		0.00337411	0.748898	1		0.00371156	1.0543251402769842	1		0.00250762	0.15456049968595664	1		0	1.9353448417207106	1		0.00271228	1.0073999304896137	1
Gm32849	0.5174523816088719	1.5334369956620983	6.708165183287479e-05		0.2398674957116053	0.30906619882675646	0.9425857284702737		0.1457202002655938	-0.639667	0.16168714941059725		0.15090013850142375	-0.538682	0.7605323211067629		0.0869554	-1.32508	0.1757608624965517		0.16758089080211622	-0.300782	1		0.8573704290988685	2.1242487875175726	1		0.0867636	-1.29223	0.354344		0.8759994630278171	2.0987665856614797	1		0.00271228	-5.26969	1
Ccm2l	0.019954046088185254	2.04175	6.859890585315512e-05		0.00515844	-0.31683	0.9873670243337859		0.00472191	-0.460011	0.7636256610071896		0.00445571	-0.508949	1		0.00335617	-0.815141	0.8434249951674911		0.011247	1.0349980202634192	1		0.0092789	0.8626295161634525	1		0.00551676	-0.0429767	1		0	0.7408418175577332	1		0	-1.20205	1
Gm10309	0.015895596036350965	2.1378099284196486	6.994246251361403e-05		0.00496004	0.14224765793089134	1		0.00153736	-1.80486	0.00442614		0.00445571	-0.0429272	1		0.00213575	-1.01885	0.7773676781404293		0.013496447581378487	1.7093058254387863	0.9797692992332144		0.011134680897387903	1.4978450157133025	1		0.00100305	-1.70558	0.6438779245351908		0	1.134378247625655	1		0	-0.808517	1
Xrcc6	0.49682192717871426	1.5309722677911608	7.012186402554241e-05		0.20137759151966864	0.028152747586175142	1		0.14736737660619958	-0.550443	0.2973950662372219		0.16233646789572456	-0.349315	1		0.1360774956710259	-0.587615	0.8041995282660536		0.29692184679032674	0.6020005692385397	1		0.22269361794775805	0.176927	1		0.18105	-0.137889	1		0.0834285	-1.09875	1		0.0678069	-1.50769	1
Gm17494	0.0804926	1.6080185407973935	7.141974525062106e-05		0.0326371	0.11257679125454878	1		0.021632915939956275	-0.64862	0.25967691080841654		0.024209372613909517	-0.415448	1		0.021357454477515275	-0.558544	0.8652362790652683		0.0472376	0.6623172501348966	1		0.027836702243469756	-0.0640696	1		0.0245747	-0.320976	1		0.0417143	0.739543	1		0.0189859	-0.52138	1
Gm36602	0.015219187694378584	2.1245036719565498	7.20081016275495e-05		0.00396803	-0.220322	1		0.0037336	-0.317571	0.8747531371928232		0.00297048	-0.645736	0.9936495120048627		0.00213575	-0.964406	0.7842343373703164		0.00674822	0.8162210293552983	1		0.00742312	1.0482633874897829	1		0.00250762	-0.625658	1		0.010428565036045442	2.195407681023214	1		0	-0.756366	1
4931422A03Rik	0.46198689756713657	1.526701459455824	7.270862153567939e-05		0.1794542182557047	-0.0615135	1		0.15296777616425933	-0.356934	0.6859762206106859		0.1590689452116386	-0.26382	1		0.11472004119351062	-0.741032	0.6771767370744448		0.3002959586856713	0.7243679638724101	1		0.15959709286255994	-0.203244	1		0.14744797144531493	-0.341383	1		0.0834285	-0.997206	1		0.00542455	-4.52636	1
2210411M09Rik	0.0436283	1.6921713870727961	7.275596187532488e-05		0.018649747391969312	0.3158577061810597	0.9457605653410784		0.010212493311756008	-0.80585	0.13450589111470604		0.013218614494711333	-0.322967	1		0.00640724	-1.34369	0.36991959464410745		0.029242303092986723	0.947239	1		0.014846241196517205	0.0517963	1		0.011535	-0.440819	1		0.010428565036045442	0.36033200140716026	1		0	-2.58506	1
Gm37915	0.011837145984516677	2.4440564010747403	7.276154473277357e-05		0.00297602	0.015055641477111692	1		0.00241586	-0.355008	0.891047		0.00103967	-1.55061	0.3201484955933589		0.000915319	-1.40692	0.7088659873787447		0.00787293	1.6310615142178246	1		0.00371156	0.8827137622067847	1		0.00100305	-1.06334	1		0	1.7670733591309125	1		0	-0.175822	1
Col4a4	0.0399081	1.8431271519485195	7.338994736206869e-05		0.0104161	-0.492402	0.8847532623952642		0.010212493311756008	-0.510394	0.6610436096108349		0.010099615568992928	-0.487334	1		0.00884809	-0.617603	0.9064320395696955		0.0539858	2.1335618547470085	0.9797692992332144		0.012990461046952553	0.12632891165681404	1		0.00952895	-0.461429	1		0	-0.398433	1		0.00271228	-1.33837	1
4930592I03Rik	0.00980792	2.436279050483021	7.38536789213195e-05		0.00238082	-0.0575929	1		0.00175699	-0.576983	0.7728366617493356		0.000742619	-1.71948	0.23053001216035035		0.000610213	-1.56977	0.6628456012624493		0.00674822	1.7014508421092236	1		0.00742312	1.9182028469254107	1		0.00200609	-0.0278554	1		0	2.027463043709143	1		0	0.0845678	1
Gm13008	0.2008932775657973	1.5204215334417501	7.675071987546017e-05		0.0772774	-0.08805	1		0.0638006	-0.438722	0.5728143882932594		0.0755986	-0.11565	1		0.0558345	-0.570655	0.8344014536964949		0.14058799563935925	0.8352345606609255	1		0.10021212807649113	0.3387785297456838	1		0.0436326	-0.912465	0.7812651447582577		0.010428565036045442	-1.97303	1		0	-4.91642	1
Gm36816	0.020292250259171446	1.8986222645402222	7.725410427406994e-05		0.00704326	0.10830032600755413	1		0.00538078	-0.391683	0.7788496717643528		0.00282195	-1.36361	0.0843952		0.00244085	-1.3856	0.5286356182494987		0.012371743616263612	1.030468361782905	1		0.011134680897387903	0.9578299210461205	1		0.00902743	0.5273062772483623	0.9993914771484494		0	0.6104451803020581	1		0	-1.33245	1
4933417D19Rik	0.0443047	1.7433440390623112	7.843547154005797e-05		0.016764932495972412	0.11939498687707406	1		0.013067598968806073	-0.352103	0.7791809679784376		0.011881900669403445	-0.480847	1		0.0048817	-1.71048	0.17372026777540633		0.030367007058101594	1.0207293585826367	1		0.022269361794775806	0.6103749490829014	1		0.00651981	-1.22619	0.6642080043859642		0.0417143	1.7074386592905197	1		0	-2.56751	1
Gm44040	0.0175866	2.2228205330524107	7.914379239773195e-05		0.00456324	-0.136054	1		0.00362379	-0.537988	0.7636256610071896		0.00178229	-1.56145	0.14583465598532944		0.00152553	-1.53698	0.6090098910452052		0.021369375337182604	2.3034868561893216	0.9797692992332144		0.011134680897387903	1.411944942307655	1		0.00250762	-0.764821	1		0	1.051441906643583	1		0	-0.891453	1
Gm48855	0.322647	1.5284628540128593	7.924200827680032e-05		0.1168585235518077	-0.196469	0.9873670243337859		0.10245436838568124	-0.430985	0.5390253005432679		0.11406624642627307	-0.216526	1		0.0921422	-0.524287	0.8584938515677214		0.2744277674880292	1.1325807632159053	0.9862338045678373		0.10949102882431438	-0.220682	1		0.10632302702859445	-0.290098	1		0.0312857	-1.649	1		0.00813683	-3.59189	1
Gm46440	0.0916533	1.6139455649494314	7.977573005752499e-05		0.0349187	-0.0063066	1		0.026354821449692922	-0.524146	0.4763189558775682		0.0292592	-0.309522	1		0.0186115	-0.958427	0.6104586310372989		0.0596093	0.8152003748798391	1		0.0556734	0.7231192318016113	1		0.029088375319143763	-0.261407	1		0.020857130072090883	-0.182419	1		0	-3.71256	1
Gm48914	0.0500542	1.6693302841860893	8.127799493221808e-05		0.017558538767971105	-0.110911	1		0.012298916676523363	-0.744731	0.18697065773856417		0.015743518386959563	-0.281374	1		0.015560431119332557	-0.257014	1		0.0438635	1.3193532616483425	0.9797692992332144		0.020413581645211155	0.2556742871002404	1		0.013039616522374791	-0.487343	1		0.010428565036045442	0.14508872770765535	1		0	-2.79995	1
Gm36279	0.42275521373273844	1.5251166613984692	8.127799493221808e-05		0.17032774612771973	0.00950695	1		0.14022961246357443	-0.355255	0.6889070418069324		0.14198871299937116	-0.307844	1		0.10343110096968111	-0.764718	0.6643157160241636		0.2924230309298672	0.8166787986207189	1		0.24496297974253387	0.5485709143024979	1		0.0807453	-1.10591	0.5348183215754013		0.16685704057672707	0.0490733	1		0.00813683	-3.98436	1
A730085K08Rik	0.012513554326489058	2.3052475240028665	8.137094183129815e-05		0.00277762	-0.347235	0.9873670243337859		0.00219624	-0.72981	0.6154805125531593		0.003119	-0.0911762	1		0.00122043	-1.25189	0.7426726873637234		0.00449882	0.7305971877687396	1		0.00556734	1.1323276522782573	1		0.00250762	-0.204521	1		0	1.5927431785685995	1		0	-0.350152	1
Ambn	0.011837145984516677	2.331581671816328	8.325718198879208e-05		0.00376963	0.38325575743468576	0.962785		0.0018668	-0.880411	0.4772352467520123		0.00163376	-0.99366	0.8429500312894761		0.000305106	-2.51189	0.3319527474028589		0.00674822	1.3426574534699993	1		0.00371156	0.8040017861927451	1		0.00200609	-0.379328	1		0	1.6897676329634637	1		0	-0.253128	1
Arg1	0.023674291969033354	1.891864898364914	8.642136381173698e-05		0.00843207	0.15428021342578901	1		0.00439247	-1.00881	0.1017953529821773		0.00712914	-0.146116	1		0.00579702	-0.406924	1		0.011247	0.6648863918660917	1		0.00371156	-0.515371	1		0.00401219	-0.84544	1		0	0.3855105644031571	1		0.00271228	-0.552296	1
Fbxl22	0.016572004378323346	2.1616566703740165	8.86470985806741e-05		0.00416643	-0.253489	1		0.00351398	-0.54098	0.7560536088380543		0.0025249	-1.00288	0.6831065766775453		0.00183064	-1.26397	0.6749608891723053		0.010122335686033865	1.2590927368308673	1		0.020413581645211155	2.275452594376855	1		0.00351067	-0.290544	1		0	1.0923141880591105	1		0	-0.850581	1
Gm48086	0.0615532	1.6242451721984956	8.913871328851151e-05		0.023510585807961313	0.00915942	1		0.017569880966461948	-0.526775	0.4882932890503874		0.018119898520840252	-0.435514	1		0.010068514253685773	-1.25865	0.38194241165824727		0.0281176	0.322688	1		0.0909332	2.0446385236710287	1		0.016550282509168002	-0.486489	1		0.0417143	1.1395093557288059	1		0	-3.13215	1
4930551O13Rik	0.00946972	2.697709570614226	8.955274591200966e-05		0.000793606	-1.59472	0.20317046357800098		0.00153736	-0.528736	0.8488393828067914		0.000594095	-1.76571	0.37057858941002086		0.000305106	-1.94579	0.6322294698592195		0.00562352	1.69862	1		0.00185578	0.772432	1		0.00752286	2.115880031521897	0.048594685305426794		0.010428565036045442	3.2684711432129374	1		0	0.3069602123485229	1
Gm42435	0.011837145984516677	2.3497290185265873	9.011136309565687e-05		0.00327363	0.11225291763305378	1		0.00120793	-1.53716	0.063634		0.00282195	-0.12611	1		0.00122043	-1.13844	0.7901989478089343		0.00562352	1.1202650321335508	1		0	-0.793672	1		0.00300914	0.14562737491595001	1		0	1.702367669743098	1		0	-0.240528	1
Gm36043	0.030100171217770977	1.7905625186827692	9.080712571752125e-05		0.00783686	-0.547052	0.7708076260511098		0.012848	0.4080974038627385	0.6859762206106859		0.00415867	-1.47963	0.018032325823447458		0.00122043	-2.91166	0.00835534		0.023618783267412354	1.2750784410035667	1		0.0092789	0.073434	1		0.017051806221567035	0.7878147443300554	0.6292430198261939		0.010428565036045442	0.969204	1		0.00271228	-0.973692	1
B230398E01Rik	0.0453194	1.67166	9.104148195853875e-05		0.016665731711972578	-0.0158402	1		0.014824587065452269	-0.23386	0.8781616467587411		0.013218614494711333	-0.40592	1		0.010068514253685773	-0.758959	0.7667462203305696		0.012371743616263612	-0.333138	1		0.018557801495646505	0.2746481923259685	1		0.0125381	-0.393752	1		0.010428565036045442	0.28970497765215697	1		0.00271228	-1.65319	1
Gm22146	0.205628	1.5098815089696056	9.169730373719e-05		0.0843207	0.027534456476479896	1		0.0504036	-0.901317	0.0227013		0.0840644	0.019908995178141264	1		0.0628519	-0.433633	0.9472153333496969		0.1507103313253931	0.8954795589780065	1		0.0445387	-0.856084	1		0.0742255	-0.16543	1		0.0312857	-1.01405	1		0.00271228	-3.9579	1
Gm50146	0.00676408	2.5904999691778903	9.261371218289125e-05		0.00198402	0.47155528318385187	0.9574078066502625		0.000878494	-0.938127	0.5382963354952692		0.000445571	-1.68554	0.39746486233401596		0.000610213	-0.926931	0.900459		0.0011247	0.44550586106174883	1		0.00371156	1.7912907344431899	1		0.00100305	-0.154768	1		0	2.652614634545997	1		0	0.7097193818489291	1
Tm4sf20	0.00879331	2.5660469254533504	9.375664694866256e-05		0.00188481	-0.171413	1		0.00142755	-0.628272	0.7709437696475678		0.000891143	-1.22057	0.7779500399456776		0	-2.94579	0.32927504130168933		0.00787293	2.1742038392443543	0.9797692992332144		0.00371156	1.3953620581120516	1		0.00150457	-0.116293	1		0	2.2684711432129374	1		0	0.32557589051586966	1
Bcl6b	0.011160737642544296	2.231197603627092	9.442390543624836e-05		0.00367043	0.3457810520160223	0.9823538133963697		0.000768682	-2.17709	0.00224805		0.00193081	-0.729039	0.9936495120048627		0.00152553	-0.862226	0.855886		0.00224941	0.0810944	1		0.00185578	0.21903928547158813	1		0.00651981	1.2423033943276227	0.44762		0	1.702367669743098	1		0.00542455	1.3699700098743222	1
Gm11365	0.0084551	2.326043488274898	9.505327820772216e-05		0.00297602	0.5909159350910151	0.9085951812902363		0.000988306	-1.32315	0.14054764466984215		0.00148524	-0.608575	1		0.00122043	-0.660857	0.9761459782073147		0.00337411	0.9815587613019581	1		0	-0.335821	1		0.000501524	-1.26439	0.8890651339107343		0	2.160218252560914	1		0	0.21732299986384618	1
Capsl	0.024012496140019546	1.9324105779965057	9.657222379083182e-05		0.00912647	0.33394328204442303	0.9458991491275269		0.00285511	-1.68074	0.00170458		0.00698062	-0.169737	1		0.00335617	-1.17619	0.6402664460479172		0.0224941	1.6623812774306312	0.9797692992332144		0.00556734	-0.0849031	1		0.00300914	-1.20801	0.8377373727792913		0.020857130072090883	1.9909371676840282	1		0.00813683	0.46824111938158275	1
Gm16172	0.00980792	2.609115647345238	9.822528678890492e-05		0.00238082	0.10160567343354643	1		0.000988306	-1.34252	0.22541727602802203		0.00178229	-0.347668	1		0.000305106	-2.05404	0.6192950248354222		0.00224941	0.5308973522923939	1		0.0092789	2.320400000430829	1		0.000501524	-1.28188	1		0	2.1429402611290795	1		0	0.200045	1
1700085D07Rik	0.019615841917199065	2.008675810005135	0.000100628		0.00595205	-0.0444726	1		0.00296492	-1.2356	0.0561422		0.00519833	-0.255152	1		0.00122043	-2.12526	0.23745622840510575		0.019119967406952855	1.7939317581261882	0.9797692992332144		0.0092789	0.8626295161634525	1		0.00752286	0.3996729975224893	1		0	0.7408418175577332	1		0	-1.20205	1
Gm28809	0.0815072	1.5695579883712312	0.000103059		0.0223202	-0.673162	0.29710992876261727		0.0318454	-0.00396806	1		0.015892042145327107	-1.15396	0.030110607714692327		0.011594046716365434	-1.51643	0.14473324538728827		0.0472376	0.6121085095023266	1		0.042682943439986964	0.4820736913053816	1		0.0922804	1.704188560123045	0.000489901		0.010428565036045442	-0.634667	1		0.00271228	-2.57756	1
0610005C13Rik	0.0341586	1.7213818795961489	0.000104169		0.012400097999979596	0.011003124652638974	1		0.00801626	-0.773068	0.2016736126358186		0.0111393	-0.169414	1		0.00823788	-0.585894	0.8996837657455533		0.0168706	0.5485993540258525	1		0.014846241196517205	0.431066	1		0.011033521672778669	-0.114597	1		0	-0.268873	1		0	-2.21177	1
Cp	0.506968	1.5019756253557741	0.000105946		0.16824452966372316	-0.390153	0.8219580104241776		0.21094838335358376	0.0470255	1		0.15297947111856935	-0.510631	0.820649		0.16109622805897236	-0.383215	0.979334		0.4386345463948008	1.1345871515287662	0.9797692992332144		0.12990461046952553	-0.655152	1		0.12889159408655082	-0.702565	0.9629216132087832		0.0834285	-1.15105	1		0.0623824	-1.67598	1
Gm9961	0.020630454430157638	1.8603522476125045	0.000105948		0.00704326	0.034719193626447264	1		0.00582002	-0.317364	0.8434845332893582		0.00475276	-0.615148	0.9809016767648933		0.00396638	-0.772516	0.8061364362530384		0.013496447581378487	1.0970359787218946	1		0.00742312	0.4069500323872637	1		0.00250762	-1.27024	0.7116018899453294		0	0.5579777604079226	1		0	-1.38492	1
Pkd2l2	0.16436722709928872	1.5097415689976086	0.000106862		0.0767814	0.296469	0.9457605653410784		0.045791502268841454	-0.681009	0.16145478371132435		0.0573302	-0.257124	1		0.039968950522207156	-0.781815	0.6684807811053664		0.0866022	0.4077368181860028	1		0.0742312	0.19281054926539687	1		0.039620373279523405	-0.764821	0.931336		0.0625714	0.1180079244269443	1		0.00542455	-3.04969	1
Olfr1426	0.022997883627060973	1.977399377924339	0.000107242		0.00535684	-0.568246	0.8736207399276151		0.0056004	-0.469897	0.7636256610071896		0.00519833	-0.547461	1		0.00549192	-0.373591	1		0.013496447581378487	1.0266466508304974	1		0.014846241196517205	1.2091432493290881	1		0.0085259	0.3147177248794488	1		0	0.49086356454938596	1		0	-1.45203	1
1700022I11Rik	0.0483632	1.6367014790171366	0.000107381		0.018550546607969474	0.0304857	1		0.011640046140281041	-0.810504	0.1164046555285423		0.014852375836754306	-0.351828	1		0.014950218134260692	-0.292536	1		0.041614046709250334	1.266012150770659	1		0.011134680897387903	-0.508778	1		0.015547235084369943	-0.206048	1		0	-0.833249	1		0.00271228	-1.77396	1
Spata9	0.0081169	2.7698889504180197	0.000108736		0.00178561	0.057978741033286596	1		0.000988306	-0.921053	0.6245324371683675		0.00103967	-0.736163	1		0.00152553	-0.000931945	1		0.0011247	0.3034868561893216	1		0	0.0168504	1		0	-1.92921	0.8377373727792913		0	2.512889870879385	1		0	0.5699946181823154	1
Gm47403	0.0175866	2.0118328749882126	0.000110153		0.00505924	-0.144374	1		0.00516115	-0.0985917	1		0.00386162	-0.557923	1		0.00152553	-1.69395	0.44854339867120974		0.0168706	1.7799249001323076	0.9797692992332144		0.00185578	-0.590138	1		0.000501524	-2.5362	0.2096784230088918		0	0.8986330633641906	1		0	-1.04426	1
4933413J09Rik	0.00574947	3.2611923439249297	0.000113215		0.000694405	-0.589556	0.9873670243337859		0.000658871	-0.628272	0.8650936409566693		0.000594095	-0.643717	1		0.000305106	-0.888457	1		0.0011247	1.0940334905603706	1		0	0.791291	1		0.000501524	-0.116293	1		0	3.287330170464254	1		0	1.3444349177671846	1
Gm47106	0.014880983523392394	2.0565746243164593	0.000113555		0.00565444	0.4677335722314435	0.9455071295329556		0.00307473	-0.675678	0.5789731694086536		0.0025249	-0.917711	0.7478593031452371		0.00122043	-1.68799	0.49039162441433176		0.00787293	0.9997061080122176	1		0.00185578	-0.318334	1		0.00250762	-0.643806	1		0.010428565036045442	2.1777056792897556	1		0	-0.77396	1
Gpr21	0.0449812	1.6457921099829704	0.000114047		0.018153743471970126	0.14336819782480692	1		0.013067598968806073	-0.47418	0.6094587574328405		0.013367138253078874	-0.398294	1		0.00732256	-1.23482	0.4387340545011913		0.017995263441837984	0.1717811769774995	1		0.0445387	1.483402092825136	1		0.0100305	-0.723976	1		0.020857130072090883	0.8675547521787461	1		0	-2.66503	1
Sdr39u1	0.027732742020867642	1.7448820305591148	0.000115128		0.00853127	-0.285174	0.9810287662800385		0.0074672	-0.511978	0.6172866725521607		0.00727766	-0.510451	0.9936495120048627		0.00854298	-0.19171	1		0.00787293	-0.155945	1		0.00742312	-0.110529	1		0.011033521672778669	0.22011712989696886	1		0.010428565036045442	1.051441906643583	1		0.029835	1.7343814360831988	0.9490312780265666
9430018G01Rik	0.00744049	2.797693355689441	0.000115342		0.00178561	0.2550155880928404	1		0.000878494	-0.938127	0.6203865666511783		0.000445571	-1.68554	0.5445256284908411		0.000305106	-1.53698	0.7487427706772258		0.00224941	1.0555593427457346	1		0	0.1565751985249335	1		0.00200609	0.6337283363845163	1		0	2.652614634545997	1		0	0.7097193818489291	1
Gm48689	0.010146125129585723	2.308498058703287	0.000115592		0.00337283	0.44952897685385373	0.9457605653410784		0.00131774	-1.19462	0.19501468712481965		0.00118819	-1.23182	0.580519		0.000305106	-2.30836	0.373174		0.011247	2.2710653784969432	0.9797692992332144		0	-0.604638	1		0.00200609	-0.169874	1		0	1.891401494133114	1		0	-0.0514938	1
Gm11714	0.1937909899750873	1.4886203551586767	0.000116718		0.0744006	-0.126402	1		0.0767584	-0.0625664	1		0.0562905	-0.585614	0.7397636167530738		0.037528098581919696	-1.14371	0.36597671461828657		0.17545381855792033	1.1966947263667707	0.9797692992332144		0.0779428	0.00451524	1		0.0672042	-0.243123	1		0.0312857	-0.945533	1		0.00271228	-3.88944	1
Il17c	0.0673026	1.5786190465773524	0.000117696		0.0239074	-0.182063	1		0.022401598232238983	-0.295305	0.8120789896142733		0.023021182546969172	-0.223957	1		0.015255324626796624	-0.81715	0.6771767370744448		0.0461129	0.8708455384395588	1		0.033404	0.42605885533496757	1		0.019559424783562186	-0.413048	1		0	-1.35349	1		0	-3.29638	1
Shisa3	0.0128518	2.09656	0.00011998		0.00357123	-0.126346	1		0.00241586	-0.794708	0.44940739903073706		0.003119	-0.313569	1		0.00152553	-1.17086	0.6796778412117345		0.00787293	1.2482044206881309	1		0.00742312	1.2736835015237986	1		0.00250762	-0.398693	1		0.010428565036045442	2.416316611184331	1		0	-0.536921	1
Slc9b1	0.0135282	2.256174269158307	0.000123206		0.00317443	-0.291406	1		0.00230605	-0.821685	0.5011890109347796		0.00356457	-0.0416812	1		0.00213575	-0.690231	0.9720026782786211		0.00562352	0.8550263553730275	1		0	-1.04824	1		0.00250762	-0.355301	1		0.010428565036045442	2.4584420868570076	1		0	-0.4951	1
Gm17023	0.00913151	2.43296	0.00012323		0.00297602	0.537477	0.9457605653410784		0.000878494	-1.53249	0.0905967		0.00148524	-0.64757	1		0	-3.08839	0.24299434493508504		0.00674822	1.8070610300698222	1		0.00185578	0.6469008251080144	1		0.000501524	-1.29916	0.9339874644654006		0	2.1258667477701367	1		0.00271228	1.20005	1
Gm26789	0.0355114	1.660758434441334	0.000124377		0.015078519167975188	0.26447591734190734	0.9582035734197163		0.0101027	-0.496381	0.5945461456186037		0.00891143	-0.661691	0.7806615739445332		0.00640724	-1.06192	0.5865856630176957		0.030367007058101594	1.2874745382006907	1		0.011134680897387903	-0.0421701	1		0.00802438	-0.677358	1		0	-0.371633	1		0	-2.31453	1
Gm38804	0.024012496140019546	1.9255893121404917	0.000125892		0.00773766	-0.0110593	1		0.00538078	-0.662135	0.5129606372828449		0.00668357	-0.249438	1		0.0048817	-0.652237	0.9166910533646594		0.00787293	0.19496239941115157	1		0.014846241196517205	1.1058554409170664	1		0.00300914	-1.21323	0.8453905409297754		0.010428565036045442	1.3957063315090457	1		0.00271228	-0.547189	1
Gm20650	0.1251355432648906	1.5090851375552448	0.000129155		0.0520804	0.0559377	1		0.039642	-0.454434	0.5598999839404758		0.042477794893117315	-0.303863	1		0.028069797313305788	-0.901396	0.6022303467973089		0.11584450840683201	1.2515459277775194	0.9797692992332144		0.046394503739116265	-0.0765257	1		0.030091422743941824	-0.764005	0.931336		0.0312857	-0.298423	1		0.00542455	-2.65715	1
Gm49587	0.01319	2.266354049040708	0.000131518		0.00446404	0.4452585394756232	0.9457605653410784		0.00175699	-1.20614	0.18691201611042352		0.00133671	-1.49877	0.267554		0.000610213	-2.11641	0.42849468650070827		0.017995263441837984	2.532968702312089	0.9797692992332144		0.00371156	0.6018129355794768	1		0.000501524	-1.94026	0.6484689402042005		0.010428565036045442	2.501834682370389	1		0	-0.452032	1
Cpsf4l	0.0706847	1.5630192327557832	0.000137725		0.030454640687949886	0.18641177409381804	0.9873670243337859		0.018448375014785044	-0.742106	0.14456115666897798		0.022575611271866546	-0.355504	1		0.0183064	-0.63091	0.8157756644413484		0.0652328	1.300433532211767	0.9797692992332144		0.0352598	0.4171664284304004	1		0.014544187659571882	-0.929208	0.8113188131390509		0.010428565036045442	-0.434848	1		0	-3.37918	1
Gm49595	0.0815072	1.5460224739104418	0.000140177		0.030256239119950214	-0.131189	1		0.0276726	-0.291837	0.8061903354449554		0.025249038922482318	-0.423226	1		0.0198319	-0.741827	0.7371141971640732		0.058484606185973446	0.9072859989233333	1		0.0408272	0.40038887518688426	1		0.029088375319143763	-0.140541	1		0.010428565036045442	-0.653331	1		0.00271228	-2.59623	1
Klhl32	0.0399081	1.6849155710699968	0.000140475		0.015276920735974862	0.0785221	1		0.00911438	-0.853881	0.1187603266623788		0.011881900669403445	-0.358511	1		0.010678727238757638	-0.466181	0.979334		0.0281176	1.0180846373270729	1		0.0092789	-0.417478	1		0.014544187659571882	0.025635960824805792	1		0.010428565036045442	0.4826896331036856	1		0.00271228	-1.46021	1
4930556J24Rik	0.2972814662968617	1.4644489783192258	0.000142093		0.1079304529918224	-0.259958	0.9516120589401545		0.11156874413703337	-0.189516	0.8777168399810485		0.10574891595769066	-0.26693	1		0.0863451	-0.552665	0.8444939069130702		0.2575572080113061	1.1069756008545628	1		0.053817624337374866	-1.16274	1		0.1023108373294022	-0.277889	1		0.0312857	-1.58206	1		0.00542455	-3.94032	1
Gm12248	0.0365261	1.6971802383606676	0.000142866		0.012003294863980248	-0.208448	1		0.00944381	-0.629308	0.3895467070504465		0.00980257	-0.519452	0.9936495120048627		0.00884809	-0.601836	0.8808313060135179		0.029242303092986723	1.2191705702558462	1		0.025980922093905106	1.0695918969302953	1		0.016048758796768973	0.31737511196508006	1		0.010428565036045442	0.6193783050720656	1		0	-2.3265	1
Gm16188	0.00507306	3.024153146624081	0.000143352		0.000793606	-0.323416	1		0.000549059	-0.850664	0.7636256610071896		0.000742619	-0.29322	1		0.000305106	-0.848929	0.9802180347734284		0	0.0940335	1		0	0.829765	1		0.00100305	0.5488394387980033	1		0	3.3258043182788883	1		0	1.3829090655818206	1
Gm41555	0.029761967046784788	1.7794091062128414	0.000143521		0.00833287	-0.425641	0.9457605653410784		0.00790645	-0.50319	0.6680970036439875		0.00905995	-0.232325	1		0.00640724	-0.699352	0.8411558655064963		0.010122335686033865	0.0979379	1		0.011134680897387903	0.3074143588363487	1		0.018054853646365096	0.8847608057648655	0.5042231988025313		0	-0.0269847	1		0	-1.96988	1
Lrrc63	0.0378789	1.852552615844238	0.000149204		0.0131937	0.0687855	1		0.00856532	-0.716808	0.38351530835999215		0.00891143	-0.598497	0.9936495120048627		0.00732256	-0.809935	0.817887		0.0314917	1.399916618872413	1		0.016702021346081855	0.537779	1		0.00752286	-0.710971	1		0.020857130072090883	1.2747301336846197	1		0	-2.25939	1
2610027K06Rik	0.12276811406798725	1.5065565111979287	0.000153436		0.044938	-0.200055	0.9873670243337859		0.048427	-0.0518012	1		0.0401014	-0.371573	1		0.031426	-0.70393	0.7518578386556806		0.10122335686033865	1.0748795650697271	1		0.0556734	0.20714493062518535	1		0.021063995920759276	-1.25701	0.45981244010720923		0.010428565036045442	-1.27451	1		0.00542455	-2.63164	1
Gm15638	0.00507306	3.235657251817794	0.000153466		0.000892807	0.042712	1		0.000329435	-1.38982	0.524508		0.000742619	-0.151201	1		0	-1.76647	0.783981		0.0011247	1.2590927368308673	1		0	0.9517554066364351	1		0	-0.994303	1		0	3.4477948426575002	1		0	1.5048995899604307	1
Tac4	0.011837145984516677	2.2105662708549625	0.000157221		0.00317443	-0.0828189	1		0.00219624	-0.715735	0.6378687191875508		0.00148524	-1.22611	0.5018827125748159		0.000915319	-1.57382	0.6215896928591103		0.011247	1.9555635527690134	0.9797692992332144		0.00742312	1.478503293412297	1		0.00351067	0.24766990407743883	1		0	1.6045203463449527	1		0	-0.338375	1
Prg4	0.00879331	2.355829218063005	0.000157613		0.00248002	0.1581892017999138	1		0.00120793	-1.06012	0.3693343586959739		0.00118819	-0.975044	0.8819933171352956		0.00122043	-0.696926	0.9857586863562418		0.00674822	1.8070610300698222	1		0.00185578	0.6469008251080144	1		0.00150457	-0.264392	1		0	2.1258667477701367	1		0	0.18297149507306898	1
Glis2	0.0913151	1.5268148173229474	0.000159303		0.032240254799946945	-0.248081	0.9797714314781772		0.0325043	-0.224123	0.8660741856881664		0.031189989257184043	-0.276024	1		0.024103412910338667	-0.636686	0.8015115322395822		0.058484606185973446	0.7207945290929922	1		0.0371156	0.0850219	1		0.0336021	-0.112849	1		0	-1.83325	1		0.00542455	-2.189	1
Gm21761	0.0084551	2.351134469237728	0.00015976		0.00208322	-0.106666	1		0.000878494	-1.47516	0.10048580102048908		0.00207933	-0.0587547	1		0.000915319	-0.982785	0.8633991130612115		0.00674822	1.8629142648033392	1		0.00185578	0.6993682450021499	1		0.00150457	-0.210621	1		0	2.1777056792897556	1		0	0.23481042659268603	1
Gm12592	0.2380957363742783	1.4642740114517179	0.00015992		0.0974152	-0.0274677	1		0.0765388	-0.472863	0.4947841886466294		0.0917877	-0.127949	1		0.0692592	-0.549585	0.8444939069130702		0.17432911459280545	0.8546028429552233	1		0.092789	-0.0664335	1		0.0621889	-0.68841	0.9887966633525256		0.020857130072090883	-1.67744	1		0.00542455	-3.62034	1
Fam210a	0.8803454570770546	1.4629568038746492	0.000160831		0.41545288339131636	0.26436987098657627	0.9457605653410784		0.2424643573371749	-0.746541	0.0624054		0.3032855145865229	-0.323486	1		0.20594688246175444	-0.887072	0.578798		0.5870954697899642	0.7076464096601525	1		0.3674444696138008	0.012840780345555247	1		0.3395315532941436	-0.110415	1		0.3024283860453178	-0.239529	1		0.0705192	-2.33476	1
Kctd4	0.15963236870548203	1.4843474906510115	0.000161277		0.0571397	-0.266256	0.9574078066502625		0.0535881	-0.374611	0.7058848180710108		0.060300645897222484	-0.143726	1		0.0378332	-0.841858	0.6322294698592195		0.1383385877091295	1.1284001496312301	1		0.0371156	-0.762606	1		0.073724	0.18887115460157533	1		0.052142825180227205	-0.0831278	1		0.00271228	-3.61343	1
1700092C17Rik	0.010822533471558104	2.3185255189908816	0.000166398		0.00188481	-0.756375	0.8307443314911099		0.00230605	-0.385586	0.8775353382766575		0.00207933	-0.494854	1		0.00122043	-1.0295	0.8113437533330536		0.00449882	0.9529896091051873	1		0.00742312	1.6887210008026425	1		0.00351067	0.46380333494220416	1		0	1.8073372293446406	1		0	-0.135558	1
Plcxd1	0.051745238160887184	1.6262499941270923	0.000169893		0.015376121519974698	-0.468899	0.8320108382040525		0.014934398821492657	-0.505013	0.5682399039892089		0.016189089662062194	-0.330442	1		0.00976341	-1.04188	0.5892810711935408		0.0517364	1.4808651774784067	0.9797692992332144		0.018557801495646505	0.045379232513449885	1		0.031595993881138915	0.7533099521371893	0.5705846240582318		0.0312857	1.0676521338248417	1		0.00813683	-0.875243	1
Gm13291	0.0213069	1.8542281451817688	0.000172957		0.00872967	0.4057452825970129	0.9455071295329556		0.00428266	-0.908114	0.19057989662929642		0.0056439	-0.39368	1		0.00305106	-1.19112	0.6322294698592195		0.013496447581378487	1.0439246422623327	1		0.011134680897387903	0.8522197330855219	1		0.00100305	-2.33869	0.21033738329833804		0.020857130072090883	2.1034118969424416	1		0	-1.43554	1
4933433G19Rik	0.0896241	1.5346467344443728	0.000172996		0.033529864991944824	-0.128064	1		0.028111809546339118	-0.44681	0.6166830026156808		0.030150322948611242	-0.294545	1		0.0234932	-0.640342	0.8015115322395822		0.0944751	1.4744730530019443	0.9797692992332144		0.027836702243469756	-0.279325	1		0.0255777	-0.483688	1		0.010428565036045442	-0.799016	1		0.00271228	-2.74191	1
Zmiz1os1	0.10044663878289865	1.5240884347170685	0.000175963		0.0404739	0.00717411	1		0.0360183	-0.213234	0.8836919432321945		0.0297048	-0.521752	0.9373054844347428		0.021662560970051207	-0.944749	0.5942046635016306		0.0686069	0.8116337598596468	1		0.076087	0.9649493329462913	1		0.020562472208360247	-0.981109	0.7686333426796524		0.0834285	1.2053367982669463	1		0	-3.91543	1
Gm11672	0.0307766	1.7033659731412891	0.000179021		0.011904094079980412	0.1185963898662461	1		0.00658871	-0.943681	0.0812819		0.00950552	-0.277879	1		0.00793277	-0.497764	0.9580522186005178		0.0202447	0.947788	1		0.018557801495646505	0.865655	1		0.00802438	-0.430402	1		0.010428565036045442	0.8699217667226629	1		0	-2.07652	1
Acmsd	0.0084551	2.660462527345457	0.00018192		0.00178561	-0.115353	1		0.000439247	-2.17979	0.0333804		0.00163376	-0.200111	1		0.000610213	-1.20257	0.8580618281928668		0.00674822	2.088473965218472	1		0.00371156	1.515656291829763	1		0.00100305	-0.430402	1		0	2.3855105644031562	1		0	0.4426153117060885	1
Cgref1	0.019277637746212873	1.8577499831246937	0.000184244		0.00783686	0.3919474252630746	0.9457605653410784		0.00406303	-0.824324	0.2947964236973488		0.00534686	-0.312585	1		0.00244085	-1.34197	0.5497312215814327		0.010122335686033865	0.7988664637857683	1		0.00556734	0.17503210323249618	1		0.00200609	-1.44289	0.6640213993466744		0	0.6526146345459978	1		0.00542455	0.30696	1
Gm11752	0.00710229	2.7335630182697255	0.000187113		0.00178561	0.29063949782356246	1		0.00120793	-0.405253	0.9297271762414687		0.000148524	-2.71107	0.0842979		0	-2.53698	0.5424493029976476		0.0011247	0.4705968420245785	1		0.00371156	1.8168258265503274	1		0.00150457	0.3118002414971546	1		0	2.6772766887802666	1		0	0.7343814360831988	1
Alkal2	0.0317912	1.6827529667851087	0.000191257		0.00744006	-0.838644	0.20229361104372248		0.00878494	-0.526229	0.5888205685349177		0.011436329394300815	-0.0357238	1		0.013729792164116962	0.27470249718543993	1		0.029242303092986723	1.418129422130444	0.9797692992332144		0.012990461046952553	0.33185911580589345	1		0.0100305	-0.176301	1		0	-0.196061	1		0	-2.13896	1
Rhbdl1	0.0321294	1.7022250517367192	0.00019909		0.010515283103982698	-0.211306	1		0.00812607	-0.662135	0.3716145193669349		0.00920847	-0.404728	1		0.00793277	-0.564361	0.9181297432035912		0.019119967406952855	0.8009865156601386	1		0.038971383140857664	1.8404383837722786	1		0.00902743	-0.327798	1		0.052142825180227205	2.405974666962872	1		0	-2.13896	1
Gm16246	0.0077787	2.82062	0.000199803		0.00188481	0.2942507513759427	1		0.000658871	-1.40963	0.35898348256371904		0.00103967	-0.63307	1		0	-2.60974	0.5938565035569091		0	-0.62725	1		0.00371156	1.7415376992460905	1		0.00100305	-0.204521	1		0.010428565036045442	3.6283670882993198	1		0	0.6616250936478849	1
Sstr2	0.01319	2.2509240084711033	0.000201531		0.00248002	-0.689808	0.8847532623952642		0.00241586	-0.706481	0.655656		0.00282195	-0.389144	1		0.00274596	-0.311272	1		0.00787293	1.326206932689404	1		0.00371156	0.5907577470704828	1		0.00401219	0.2973006718020397	1		0.010428565036045442	2.490863564549385	1		0	-0.46292	1
Gm17455	0.015219187694378584	1.962752601959938	0.000201956		0.00615045	0.49642995182288097	0.9041452219323513		0.00197661	-1.50058	0.0156388		0.00445571	-0.123659	1		0.00213575	-1.08839	0.7221844654880608		0.00674822	0.692989	1		0.012990461046952553	1.6298273117490742	1		0.000501524	-2.36627	0.29357639489676274		0	1.0676521338248417	1		0	-0.875243	1
Gm42560	0.037540662979467176	1.6836093735693716	0.000204588		0.018352145039969802	0.6000181421982678	0.4571449583404196		0.00856532	-0.85636	0.13026209391186627		0.00920847	-0.67898	0.8025369214360684		0.00518681	-1.42794	0.36951280089449084		0.0258682	0.9875825489297281	1		0.020413581645211155	0.687543	1		0.00601828	-1.14009	0.7670043292423196		0.010428565036045442	0.5694733992457524	1		0	-2.3763	1
Olfr457	0.00473486	3.4835847652613783	0.000205912		0.000892807	0.36464007926734077	1		0.000219624	-1.60555	0.46293299059828885		0.000148524	-1.68554	0.9121988239891672		0	-1.53698	0.8555053698910104		0	0.44550586106174883	1		0	1.1812372527592032	1		0.00100305	0.9232349535795024	1		0	3.6772766887802666	1		0	1.7343814360831988	1
Car5b	0.0213069	1.7970842380781606	0.000209584		0.00724166	-0.0406164	1		0.00647889	-0.242982	0.9103132717123941		0.00579243	-0.401744	1		0.00335617	-1.10527	0.6322294698592195		0.00337411	-0.751796	1		0.00371156	-0.436515	1		0.0085259	0.2858050329642099	1		0	0.46379532135121515	1		0.00271228	-0.473727	1
Gm12861	0.037202458808480984	1.6930381308903275	0.000210694		0.00942407	-0.690642	0.460549		0.012518540188604137	-0.159992	0.9698206438282136		0.011881900669403445	-0.231819	1		0.010373620746221704	-0.395211	1		0.0258682	1.0088661072976937	1		0.022269361794775806	0.8267686297979058	1		0.0120366	-0.139501	1		0.010428565036045442	0.5898138475299275	1		0	-2.356	1
Il1r2	0.0270563	1.720146959733981	0.000211296		0.010515283103982698	0.14610513360040578	1		0.00889475	-0.176107	0.9510855365556775		0.00698062	-0.560007	0.9936495120048627		0.00396638	-1.2895	0.49379414500102525		0.0202447	1.154809588451048	1		0.0092789	0.17296963677560306	1		0.00200609	-2.04024	0.21520466923489132		0	0.0635825	1		0	-1.87931	1
Gm10575	0.2052899317886178	1.4426462045391442	0.000212193		0.0848167	-0.0321647	1		0.0689618	-0.415416	0.6193858592855535		0.0761927	-0.214633	1		0.0677336	-0.373459	0.9990915412115606		0.19119967406952856	1.2002297274238867	0.9797692992332144		0.059385	-0.503696	1		0.0386173	-1.18749	0.46681960474303846		0.0312857	-1.06558	1		0.00271228	-4.00941	1
Adap2os	5.59965	1.4329466743395793	0.000212887		2.3049302162362073	-0.0494037	1		1.80673	-0.49754	0.3782336792813409		2.199933908940048	-0.125725	1		1.9124074952152248	-0.332484	0.9745699611885231		4.28737	0.8884670927472793	1		2.713150578663519	0.20111296024504544	1		1.1399633982829962	-1.09459	0.3866600176646227		1.4078562798661345	-0.752794	1		0.3987047467607186	-2.5735	1
Gm4793	0.027732742020867642	1.7396831238847952	0.000213401		0.010019279183983513	0.020257133552281203	1		0.00702795	-0.622712	0.47019154865859286		0.00861438	-0.233944	1		0.00640724	-0.624714	0.8885202731107765		0.00562352	-0.583226	1		0.024125141944340456	1.4077813173661191	1		0.00702133	-0.434578	1		0	0.043404587578164566	1		0.00271228	-0.895478	1
4930544F09Rik	0.010822533471558104	2.2611923439249306	0.000218179		0.00317443	0.14224765793089134	1		0.000768682	-2.10805	0.00628127		0.00207933	-0.541147	1		0.000610213	-1.83551	0.578798		0.010122335686033865	1.981558761301959	0.9797692992332144		0.012990461046952553	2.36679	1		0.00200609	-0.299157	1		0.010428565036045442	2.780370181744371	1		0	-0.175822	1
Gm49380	0.0950354	1.4925655548547447	0.000220815		0.0419619	0.15739548422684368	0.9897188641374138		0.027013691985935246	-0.662185	0.21632352531737586		0.0329723	-0.281854	1		0.024103412910338667	-0.726673	0.7413701148127736		0.0674822	0.8440552375520243	1		0.0705196	0.910993	1		0.0240731	-0.695142	1		0.0312857	0.0850774	1		0.00271228	-2.85988	1
Gria4	0.014542779352406204	2.097526332954301	0.000222161		0.00525764	0.4052820637646857	0.9457605653410784		0.00285511	-0.725133	0.5588539347321123		0.00282195	-0.675195	1		0.00122043	-1.62386	0.5796358967257107		0.00337411	0.0273625	1		0.00742312	1.0943598020792376	1		0.00200609	-0.851698	1		0.010428565036045442	2.2406369350162123	1		0	-0.711418	1
Cryba1	0.0378789	1.6384278104913905	0.000224808		0.014483314463976167	0.025153612995672425	1		0.00856532	-0.913206	0.0739106		0.011584853152668358	-0.355761	1		0.011288940223829503	-0.340969	1		0.030367007058101594	1.171262563932232	1		0.024125141944340456	0.8664335923052224	1		0.013039616522374791	-0.094467	1		0	-0.481551	1		0	-2.42445	1
Olfr1424	0.00338204	3.3580538831775204	0.000232534		0.000595205	0.17199500132494272	1		0.000109812	-1.82794	0.3987981951856755		0.000297048	-0.615148	1		0	-1.13844	0.874471		0.0011247	1.91117	1		0	1.5797866292494778	1		0.000501524	0.7008425322430547	1		0	4.075826065270541	1		0	2.1329308125734734	1
AU021092	0.0077787	2.483584765261379	0.000233177		0.000992008	-1.10667	0.5685382287107527		0.0018668	-0.0205892	1		0.00118819	-0.685537	1		0.000915319	-0.766467	0.9669355456352025		0.00337411	1.2160240149389807	1		0.00185578	0.9099352309418087	1		0.00250762	0.6337283363845163	1		0	2.3855105644031562	1		0	0.4426153117060885	1
Nrip2	0.013866371010433821	2.005537468456734	0.000242513		0.00496004	0.2821779190753668	0.9873670243337859		0.00263548	-0.85786	0.3742111099079116		0.00237638	-0.940467	0.7006713888864905		0.00152553	-1.35143	0.6215896928591103		0.010122335686033865	1.4062464306145221	1		0.00556734	0.7630938426125384	1		0.00451371	0.19591952944701418	1		0	1.2314769357307362	1		0	-0.711418	1
Gm15747	0.11769505150319438	1.4671436181998505	0.00024583		0.049005187295919364	0.0098631	1		0.0485368	-0.00859842	1		0.0354972	-0.542096	0.8763305956015852		0.027459584328233925	-0.876842	0.625851		0.0809787	0.7722122263621536	1		0.0779428	0.7189686814504102	1		0.011535	-2.08426	0.039485963286020685		0.0834285	0.9303956257489783	1		0.00271228	-3.18818	1
Gm14471	0.0963882	1.4924395631475198	0.000251371		0.0351171	-0.224381	0.9873670243337859		0.031186538715469957	-0.433093	0.62784		0.036239797041680503	-0.143668	1		0.028985116790913586	-0.467994	0.937868		0.0776046	1.0308237491577503	1		0.042682943439986964	0.1740005014431789	1		0.033100565018336005	-0.245892	1		0.010428565036045442	-0.937433	1		0	-3.88134	1
Gm41556	0.17451335222887443	1.4470763300457579	0.000262564		0.0830311	0.26166532174965385	0.9457605653410784		0.044913	-0.87768	0.0324697		0.0709944	-0.0504482	1		0.054614062163931915	-0.45042	0.9383732330567374		0.13384	0.9123148840788233	1		0.12990461046952553	0.8630977868160397	1		0.0100305	-2.86822	0.00130859		0.0834285	0.34488425873210593	1		0	-4.77232	1
Gm16168	0.018263	2.220550359427584	0.000263138		0.00535684	0.10160567343354554	1		0.00428266	-0.313371	0.91943		0.00297048	-0.860904	0.9760962066115878		0.00274596	-0.824681	0.9432866341169709		0.00562352	0.388603	1		0.00371156	0.10061879255091899	1		0.00100305	-1.84544	0.7615957923473403		0	0.9960988727998075	1		0	-0.946796	1
Arf4os	0.0899623	1.4822345592284414	0.000266078		0.0352163	-0.0962644	1		0.027562750766137182	-0.540496	0.4174745137330347		0.031487036773919126	-0.276615	1		0.032646394701344776	-0.186211	1		0.0877269	1.311498669945916	0.9797692992332144		0.020413581645211155	-0.746507	1		0.026079233044749583	-0.504225	1		0.020857130072090883	-0.260241	1		0	-3.79026	1
Dbndd1	0.014880983523392394	1.942014860053603	0.000266127		0.00615045	0.5217410403520679	0.8821330028082266		0.00252567	-1.09859	0.11644209291214386		0.00326752	-0.612008	0.9936495120048627		0.000915319	-2.10527	0.26570271903876097		0.010122335686033865	1.2503755197297588	1		0.00742312	0.9432938278882412	1		0.00300914	-0.500365	1		0.010428565036045442	2.0923141880591105	1		0	-0.858849	1
Gm26692	0.0128518	2.0685472659825344	0.00026771		0.00476164	0.42476107170490973	0.9457605653410784		0.00219624	-0.974047	0.2816097054747509		0.00267343	-0.584451	1		0.00152553	-1.19207	0.7088659873787447		0.00899763	1.4073226671738608	1		0.00556734	0.9202771751632692	1		0.000501524	-2.04639	0.472744		0	1.3855105644031571	1		0	-0.557385	1
Calr4	0.00913151	2.182415230540813	0.000269549		0.00228162	-0.240222	1		0.00296492	0.26320380907263363	0.9306287516486914		0.00133671	-0.999198	0.8126461004940608		0.000305106	-2.24886	0.3737194198023733		0.00562352	1.3806547167117813	1		0.00185578	0.46936263955582724	1		0.00100305	-0.876466	1		0	1.9502951831866833	1		0	0.00739993	1
4930477G07Rik	0.024688904481991927	1.710044556196018	0.000269835		0.00833287	-0.144832	1		0.00889475	-0.0147126	1		0.00549538	-0.805181	0.6319379542147215		0.00427149	-1.05752	0.6322294698592195		0.013496447581378487	0.7093058254387863	1		0.011134680897387903	0.5246450750570171	1		0.00802438	-0.0955016	1		0	0.18652952967676129	1		0.00542455	-0.162525	1
Ttn	0.00642588	2.6762298432037737	0.00027027		0.000992008	-0.63536	0.9457605653410784		0.00131774	-0.127504	1		0.000594095	-1.20011	0.9219899714496927		0.000610213	-0.794481	0.9776907762862291		0.00449882	1.981558761301959	1		0	0.28433074572330597	1		0.00100305	-0.0223173	1		0	2.780370181744371	1		0	0.8374749290473016	1
Gm39090	0.0889477	1.4986916576515874	0.000270577		0.0396803	0.18555001843134455	0.9873670243337859		0.0213035	-0.94983	0.025415847337859333		0.030892941740448956	-0.274111	1		0.025628945373018328	-0.527001	0.8927706413597712		0.0809787	1.2218483871649637	0.9797692992332144		0.042682943439986964	0.2966281045266914	1		0.031595993881138915	-0.18877	1		0	-1.81789	1		0	-3.76078	1
Kcnq1	0.0077787	2.3681075478414426	0.000271845		0.00248002	0.42122360763370637	0.9684363304084052		0.000768682	-1.52309	0.1187603266623788		0.00193081	-0.0250239	1		0	-2.90782	0.32927504130168933		0.0011247	0.0940335	1		0.00371156	1.4343561897279153	1		0.00150457	-0.076765	1		0	2.306438993411958	1		0	0.36354374071489026	1
Amtn	0.00574947	2.9530700485625987	0.000273195		0.00138881	0.4135496797482858	0.9890437480060524		0.000658871	-0.837725	0.7636256610071896		0.000148524	-2.2705	0.3215077059450427		0	-2.10527	0.6919229544855579		0	-0.122778	1		0.00556734	2.7172901529994133	1		0.000501524	-0.299157	1		0	3.1089929292057414	1		0	1.166097676508672	1
Fam227b	0.027732742020867642	1.7658670556884504	0.000278462		0.010812885455982206	0.20348528745275907	0.9873670243337859		0.00625927	-0.796814	0.2696471664260329		0.00831733	-0.269294	1		0.00732256	-0.405835	1		0.00899763	0.03462	1		0.00371156	-0.839344	1		0.00702133	-0.413577	1		0.020857130072090883	1.6566958113578147	1		0	-1.87931	1
Sftpb	0.00608768	2.824621683096445	0.000286421		0.00109121	-0.259851	1		0.000768682	-0.793179	0.7608536721200894		0.000891143	-0.463145	1		0.000305106	-1.23359	0.8796769493254596		0.00337411	1.811633759859646	1		0.00185578	1.4846293962091384	1		0	-1.4918	0.9626391580036945		0	2.9502951831866833	1		0	1.0073999304896137	1
Dtnbos	0.0405845	1.6475605003725038	0.000287408		0.013987310543976984	-0.168607	1		0.00977325	-0.798642	0.18251629716767243		0.012030424427770987	-0.400214	1		0.014950218134260692	-0.00956225	1		0.023618783267412354	0.7103504240224643	1		0.014846241196517205	0.12168040807874902	1		0.021063995920759276	0.5250712728650537	0.9158937165620202		0	-0.573267	1		0	-2.51616	1
Gsdme	0.8255563813772917	1.4239823092857238	0.000288334		0.3451195275354321	-0.0287824	1		0.250151	-0.617809	0.18691201611042352		0.3280889822339026	-0.114311	1		0.27184988484951583	-0.396019	0.9741377997565358		0.5758484301388155	0.7425097646721934	1		0.30806	-0.181515	1		0.2933913717534328	-0.267152	1		0.2502855608650906	-0.441679	1		0.0949297	-1.85724	1
Gm16897	0.029085558704812407	1.6457574909795039	0.000291965		0.011904094079980412	0.16976115049274565	1		0.00999287	-0.169453	0.9522528986898132		0.00712914	-0.710556	0.7479708610500139		0.00305106	-1.81576	0.14281329465921605		0.0168706	0.726058	1		0.0092789	0.0094709	1		0.00952895	-0.147154	1		0.020857130072090883	1.4945113415645297	1		0	-2.04063	1
Gm12841	0.00946972	2.171640758946637	0.000292394		0.00297602	0.18955337270924844	1		0.00208642	-0.453549	0.8164133146994411		0.00178229	-0.637174	1		0	-3.32286	0.1226818412662182		0.00562352	1.318593748579529	1		0.00185578	0.4098616278071656	1		0.00200609	-0.169874	1		0	1.891401494133114	1		0	-0.0514938	1
Gm38155	0.015557391865364775	1.9507107756886768	0.000293881		0.00535684	0.14599979279199893	1		0.00406303	-0.367608	0.8328083846246328		0.00326752	-0.676549	0.9936495120048627		0.00183064	-1.33108	0.629271		0.010122335686033865	1.1907867234399587	1		0.00556734	0.5554024706225196	1		0.00150457	-1.39066	0.7659157017005871		0	1.027463043709143	1		0.00271228	0.0925165	1
Gm48657	0.0128518	2.1251307943489017	0.000295438		0.00307522	-0.376827	0.9843765623892758		0.00439247	0.30721550429607447	0.864487		0.00178229	-1.15502	0.5577620140333371		0.00213575	-0.712427	0.929343		0.00787293	1.2700638546518714	1		0.00185578	-0.0588138	1		0.000501524	-2.00487	0.5679629858171378		0	1.4267332271296693	1		0	-0.516162	1
Ptger1	0.0666262	1.4945558830823815	0.000299379		0.030851443823949234	0.2577248753508279	0.9469493567339116		0.018777810282906208	-0.674698	0.21670539479650547		0.0204963	-0.482049	0.9936495120048627		0.0173911	-0.675891	0.7773676781404293		0.0483623	0.8864015282616187	1		0.053817624337374866	1.0482633874897829	1		0.016550282509168002	-0.711161	0.9989352412678684		0.010428565036045442	-0.404322	1		0.00542455	-1.76078	1
Osbpl6	0.025027108652978115	1.7995141195272977	0.000302275		0.00932487	0.146593	1		0.00647889	-0.528736	0.6822855892466714		0.00638652	-0.506214	1		0.00427149	-1.00573	0.7133520057742886		0.021369375337182604	1.415961585447734	1		0.00556734	-0.246184	1		0.00351067	-1.17363	0.8634382198177066		0.010428565036045442	1.2406369350162123	1		0	-1.70685	1
Gm16316	0.15117726443082727	1.4306286323995003	0.000305005		0.0624965	-0.0446702	1		0.057761	-0.191629	0.9034451366716324		0.0516863	-0.366264	1		0.042409802462494615	-0.631204	0.7820205797078307		0.1327150678835551	1.102907596704708	1		0.0816543	0.3876881302266306	1		0.0240731	-1.43296	0.279336		0.0417143	-0.311486	1		0.00271228	-3.57819	1
Gm16028	0.011160737642544296	2.342228916015837	0.000307897		0.00248002	-0.30996	1		0.00285511	-0.0382912	1		0.00207933	-0.525881	1		0.000610213	-1.82196	0.6076340783676782		0.00449882	0.9249752329355916	1		0	-0.715669	1		0.00100305	-1.0498	1		0.010428565036045442	2.793790697506693	1		0	-0.162525	1
Gm15764	0.6689678502106854	1.4159404834956648	0.000312507		0.27101654188755403	-0.0998216	1		0.23829151060764017	-0.335901	0.7179504285340274		0.25531234063380653	-0.192542	1		0.1980141136558202	-0.567279	0.817887		0.5421073111853693	0.9619783923324426	1		0.21155893705037015	-0.425904	1		0.21164300663239083	-0.448527	1		0.0625714	-1.98325	1		0.00271228	-5.73421	1
Asb14	0.014880983523392394	1.9867531748188867	0.000318724		0.00426563	-0.175928	1		0.00461209	-0.0205892	1		0.0025249	-0.975044	0.6709606646053621		0.00213575	-1.03656	0.7570034912213447		0.00674822	0.7445195640011093	1		0.00556734	0.6469008251080162	1		0.00401219	-0.0856432	1		0	1.117405169021941	1		0	-0.82549	1
Gm15346	0.0456576	1.5348739939582323	0.000320724		0.020732963855965885	0.2619019736780812	0.956354		0.0143853	-0.438356	0.6684672180137493		0.0150009	-0.332462	1		0.00793277	-1.23246	0.4216023839758457		0.0337411	0.958475	1		0.00742312	-0.996406	1		0.011535	-0.637027	1		0	-0.831065	1		0	-2.77396	1
Gm16573	0.0520834	1.5575853467051557	0.000326508		0.018748948175969147	-0.179246	1		0.015373645845654205	-0.532089	0.5020039571753203		0.017971374762472708	-0.228216	1		0.0183064	-0.164008	1		0.0371152	0.9192744830476167	1		0.025980922093905106	0.43633383916835733	1		0.013541140234773822	-0.583301	1		0.020857130072090883	0.5868904523231615	1		0.00542455	-1.356	1
Gm10791	0.015557391865364775	1.8884264974343346	0.000326508		0.00595205	0.29537741683022567	0.9816378733691982		0.00285511	-1.02059	0.15488402609406263		0.00430719	-0.284175	1		0.00122043	-1.88064	0.33294070338522885		0.010122335686033865	1.141599173812427	1		0.00742312	0.8375843867171255	1		0.00401219	-0.228768	1		0	0.9806688322302017	1		0.00271228	0.045468	1
5430431A17Rik	0.12479733909390439	1.436593534416886	0.00033214		0.047715577103921485	-0.191095	0.9890437480060524		0.0397519	-0.516763	0.4373339761873287		0.0500525	-0.0855579	1		0.0454609	-0.2225	1		0.10234806082545353	1.0076680213817344	1		0.0779428	0.607502	1		0.032599	-0.702437	0.9857096653383758		0.010428565036045442	-1.35425	1		0	-4.2979	1
Nme9	0.00980792	2.2006508019898803	0.000335175		0.00178561	-0.77975	0.7729321077233633		0.00219624	-0.400861	0.8482851548651851		0.00282195	0.0687062	1		0.000305106	-2.33722	0.39057689222385106		0.00224941	0.2445931671357524	1		0.00371156	0.9803245588332077	1		0.00501524	1.0290296176020979	0.7043473937627281		0	1.8628323419363442	1		0	-0.0800629	1
Gm16059	0.0659498	1.4817457655975974	0.0003352		0.032141054015947114	0.3513839825650722	0.9005788291068646		0.018009127990623496	-0.74173	0.1392572514366373		0.023466753822071803	-0.248294	1		0.015560431119332557	-0.838099	0.6643157160241636		0.049487	0.9249752329355916	1		0.020413581645211155	-0.296172	1		0.015547235084369943	-0.797104	0.9351117598303946		0	-1.40138	1		0.00271228	-2.3428	1
Med12l	4.290458113130816	1.3987129249409984	0.000343987		2.1408521195004773	0.30685380381931493	0.9391522325540045		1.1867356475284643	-0.801256	0.03563		1.7102510776022584	-0.133817	1		1.3082966399940785	-0.537692	0.783981		3.281886170205202	0.8582103760374145	1		1.8854726319576849	0.030269114933421326	1		0.7723465170945069	-1.30465	0.20484663484251653		1.345284889649862	-0.460836	1		0.0759438	-4.57031	1
Gm12786	0.00710229	2.4194544278416625	0.000344602		0.00198402	0.20236865036846297	1		0.000658871	-1.55901	0.12964081881044637		0.00163376	-0.100575	1		0.000305106	-1.7234	0.6322294698592195		0.00337411	1.3034868561893216	1		0.00371156	1.6018129355794768	1		0.00100305	-0.344245	1		0	2.4691684934500673	1		0	0.5262732407529978	1
Strbp	2.3041850169289178	1.4012372940737834	0.000345056		0.9804013482703867	-0.0188369	1		0.7672547394541852	-0.472871	0.43379468428787166		0.8400503773268235	-0.285709	1		0.7154747249967617	-0.507334	0.8113437533330536		1.9243684843115494	0.993447	1		0.9353131953805839	-0.0825358	1		0.8380461234187798	-0.252686	1		0.5735710769824993	-0.777585	1		0.11934019630933072	-3.03643	1
Gm5767	0.01319	2.3297794291823424	0.000351674		0.00367043	0.10477295251222785	1		0.00230605	-0.717662	0.7035707929647529		0.00178229	-1.03572	0.8786419098844039		0.000610213	-2.07132	0.5659064120956242		0.00562352	0.9459348515712378	1		0.012990461046952553	2.1203550106121822	1		0.000501524	-1.89552	0.7724921730143289		0.0312857	3.5694733992457524	1		0	-0.407638	1
1700018A23Rik	0.0084551	2.184024483402471	0.000357679		0.00248002	0.0650798	1		0.00153736	-0.757555	0.5951912935685069		0.00207933	-0.200111	1		0.000610213	-1.53698	0.6300009032277544		0.00337411	0.8772221014872237	1		0.00185578	0.5797866292494778	1		0.00200609	0.00569711	1		0	2.059524252941441	1		0	0.11662900024437306	1
Pcdhgc4	0.025027108652978115	1.7011762003340047	0.000359601		0.00922567	0.0183621	1		0.00538078	-0.936429	0.11469099756333169		0.00831733	-0.153817	1		0.00518681	-0.808287	0.77985		0.014621151546493362	0.7934291644820561	1		0.024125141944340456	1.5291605561795105	1		0.00702133	-0.312832	1		0.020857130072090883	1.7538979703831794	1		0	-1.78268	1
Gm16122	0.015895596036350965	2.0132648304813454	0.000362918		0.00486084	-0.0249267	1		0.00450228	-0.16225	1		0.00326752	-0.658401	1		0.000610213	-2.56977	0.18629737518236708		0.00899763	1.0471471029295358	1		0.00371156	0.1484473176415344	1		0.00351067	-0.341468	1		0.010428565036045442	2.051441906643583	1		0	-0.899491	1
Gm16282	0.024012496140019546	1.7647665178054313	0.000366177		0.00892807	0.10425039468910935	1		0.00219624	-2.21323	1.0556765693580624e-05		0.00905995	0.12764660175183895	1		0.011594046716365434	0.5295827712707926	0.8063455125143354		0.021369375337182604	1.4504892685760042	0.9923070469855888		0.00742312	0.11321882933055338	1		0.00100305	-2.57927	0.12010471701694489		0.010428565036045442	1.2731628385376599	1		0.00271228	-0.669732	1
Gm14023	0.21408324023425876	1.3979971197603684	0.00037152		0.0976136	0.1163271791403111	1		0.0748916	-0.3873	0.6754915938076335		0.0758956	-0.336076	1		0.0527834	-0.857654	0.6203397380590324		0.17995263441837983	1.0068698498311464	1		0.061240744935633466	-0.557629	1		0.0717179	-0.37218	1		0.020857130072090883	-1.57762	1		0.00542455	-3.52051	1
Brsk1	0.014204575181420011	2.2233489927802585	0.00037152		0.00337283	-0.300493	1		0.00318454	-0.386717	0.864487		0.0025249	-0.708257	1		0.00244085	-0.607111	1		0.00449882	0.48586359867788964	1		0.00185578	-0.130707	1		0.00451371	0.32762520865883626	1		0	1.3553485938929049	1		0	-0.587547	1
Sp9	0.00913151	2.3136597638190652	0.00037237		0.00208322	-0.284453	1		0.00175699	-0.557617	0.776153		0.00178229	-0.463145	1		0.000915319	-1.12195	0.8057543589561259		0.00899763	2.115859853013551	0.9797692992332144		0	-0.452635	1		0.00100305	-0.781309	1		0	2.0434045875781637	1		0	0.10050933488109592	1
Gm2087	0.0233361	1.7799777680416033	0.000375351		0.00744006	-0.181848	1		0.00505134	-0.852581	0.2388175206250583		0.00742619	-0.154124	1		0.00823788	0.0515355	1		0.010122335686033865	0.45548994963437117	1		0.012990461046952553	0.8593091578718415	1		0.00601828	-0.361218	1		0	0.3209385631070729	1		0.00271228	-0.617091	1
Chrng	0.011498941813530486	1.926367255023127	0.000384426		0.00406723	0.1719950013249436	1		0.00329435	-0.222897	0.9414378072808832		0.00237638	-0.709583	0.9760962066115878		0.00213575	-0.701372	0.8943837380417902		0.00562352	0.8440552375520234	1		0	-1.05881	1		0.00150457	-0.972929	0.9993914771484494		0	1.437225600947312	1		0	-0.50567	1
Mast4	1.4833634939454328	1.3944012881006485	0.000388445		0.6114736325749938	-0.089271	1		0.5855162832073444	-0.168067	0.906874		0.4945841153639184	-0.444034	0.9625550539275545		0.38229843514752343	-0.798723	0.5865856630176957		1.1415745245915971	0.8644658615086732	1		0.7812834429667179	0.2942409751977084	1		0.5486669413645393	-0.23265	1		0.448428	-0.495284	1		0.0379719	-3.99254	1
Gm15561	0.014542779352406204	1.9657364603987588	0.000389623		0.00416643	-0.19778	1		0.00384341	-0.331791	0.864487		0.00356457	-0.414235	1		0.00183064	-1.22038	0.6749608891723053		0.010122335686033865	1.3034868561893216	1		0.00185578	-0.353099	1		0.00351067	-0.24669	1		0	1.134378247625655	1		0.00271228	0.200045	1
Gm40117	0.0449812	1.5496739557191503	0.000391206		0.021228967775965068	0.36128886976770147	0.9278342510732838		0.012298916676523363	-0.673439	0.2859517893136962		0.0141098	-0.396508	1		0.00976341	-0.894353	0.6643157160241636		0.024743487232527225	0.5439604592223324	1		0.022269361794775806	0.43359627659952693	1		0.010531997960379638	-0.732811	1		0.010428565036045442	0.20434080579322167	1		0.00542455	-1.15135	1
Gm12353	1.5594594324173257	1.3939890105596169	0.000395896		0.742617	0.20250805228571744	0.9772648117076271		0.5178722414864659	-0.485008	0.4101875776145109		0.5685489470309548	-0.292631	1		0.38931588447584986	-0.84761	0.5448086181969843		1.0414758716963732	0.650942	1		1.1413	0.7779170145341359	1		0.33351326874535525	-1.05249	0.5803774390915629		1.0845707637487259	0.690544	1		0.035259603455029535	-4.16467	1
Gm31135	0.012513554326489058	1.990045292303816	0.000397548		0.00525764	0.6117329412321117	0.7389208099197794		0.00263548	-0.698661	0.5601004592498021		0.00297048	-0.440061	1		0.00152553	-1.21298	0.7021256573294328		0.00337411	0.16393550379052702	1		0.00185578	-0.120653	1		0	-3.07677	0.14583413164156003		0	1.3653326824655272	1		0	-0.577563	1
4933402D24Rik	0.00980792	2.2611923439249306	0.000400293		0.00287682	0.1422476579308931	1		0.00175699	-0.723203	0.6680970036439875		0.00163376	-0.752652	1		0.00122043	-0.926931	0.8838910720943991		0.00899763	1.9656172174329383	0.9862338045678373		0	-0.590138	1		0.000501524	-1.52155	0.910639		0	1.905901063828229	1		0	-0.0369942	1
Ccdc60	0.028070946191853834	1.6470834975442576	0.000416424		0.00972168	-0.160821	1		0.00647889	-0.868586	0.13787791687756554		0.010396663085728014	-0.0184542	1		0.00915319	-0.188332	1		0.019119967406952855	0.957712	1		0.00742312	-0.204908	1		0.00802438	-0.339013	1		0	-0.0459429	1		0.013561385944242128	0.6150825077108539	1
Wnt2b	0.037202458808480984	1.5432910113856453	0.000416916		0.015376121519974698	0.0763951	1		0.011640046140281041	-0.442353	0.6746960794808343		0.013664185769813961	-0.13344	1		0.010373620746221704	-0.521264	0.9166910533646594		0.024743487232527225	0.8214242630524557	1		0.00742312	-0.694136	1		0.00601828	-1.23982	0.5824901752184352		0	-0.530832	1		0	-2.47373	1
Myocd	0.00642588	2.7611187407902866	0.000427345		0.00158721	0.28217791907536593	1		0.000549059	-1.40525	0.34552647496443095		0.000594095	-1.14122	0.9936495120048627		0.000305106	-1.35143	0.839813		0.00224941	1.2445931671357524	1		0.00371156	1.9803245588332077	1		0.000501524	-0.579265	1		0.010428565036045442	3.862832341936344	1		0	0.891923	1
Ica1l	0.0791398	1.4532111162178598	0.000435329		0.0410691	0.4542772917520157	0.6616857736731915		0.021193668915794724	-0.80294	0.0812819		0.028813609123303354	-0.236636	1		0.017696176567084086	-0.946108	0.5918385067971825		0.0517364	0.6931687811912708	1		0.033404	0.0874734	1		0.015547235084369943	-1.09048	0.6597330582996821		0	-1.68633	1		0.013561385944242128	-1.03821	1
Gm21284	0.012175350155502867	2.063681510810718	0.000439761		0.00297602	-0.395409	0.9816378733691982		0.00263548	-0.586186	0.7198921347839813		0.00282195	-0.414235	1		0.00183064	-0.882876	0.8444939069130702		0.00899763	1.4847271708594674	1		0.0092789	1.6018129355794768	1		0.00300914	-0.110712	1		0	1.4584420868570076	1		0	-0.484453	1
Gm19395	0.00676408	2.5904999691778903	0.000447077		0.00168641	0.14224765793089134	1		0.000658871	-1.35619	0.33567503567338647		0.00118819	-0.380683	1		0.000305106	-1.53698	0.7417153011423092		0.00449882	1.8440552375520243	1		0	0.1565751985249335	1		0.00100305	-0.154768	1		0	2.652614634545997	1		0	0.7097193818489291	1
Gm17354	0.21881809862806542	1.385162712021172	0.000447933		0.0911655	-0.0793124	1		0.067095	-0.635107	0.20844956877359228		0.0952037	0.00685898	1		0.0848196	-0.173268	1		0.18220204234860957	0.981559	1		0.12990461046952553	0.4781589336921064	1		0.0446356	-1.11759	0.5389002194170365		0.020857130072090883	-1.61956	1		0.00542455	-3.56246	1
Ociad2	0.0179248	1.8897441131937693	0.000449227		0.00476164	-0.412967	0.9457605653410784		0.00538078	-0.175475	0.9821501321708132		0.00401014	-0.63307	0.9936495120048627		0.000915319	-2.41371	0.14583052793586182		0.00899763	0.772972	1		0.00371156	-0.117286	1		0.00551676	-0.00135764	1		0.010428565036045442	1.7870648343183788	1		0.035259603455029535	2.734381436083198	0.23356767459543748
Dpep2nb	0.00980792	2.3030125196195588	0.000449227		0.00337283	0.5166431727123904	0.9457605653410784		0.00175699	-0.688014	0.7427919247868023		0.00103967	-1.37004	0.5697545752342804		0.00152553	-0.617603	1		0.00449882	1.0862561399686514	1		0	-0.560695	1		0.000501524	-1.4918	0.9145304469778994		0	1.9353448417207106	1		0	-0.00755041	1
Gm17529	0.0585093	1.5023619722920065	0.000451546		0.0221218	-0.143155	1		0.017679692722502336	-0.544925	0.4588655377501513		0.0222786	-0.111453	1		0.0207472	-0.199836	1		0.049487	1.1229146105475003	1		0.012990461046952553	-0.697184	1		0.016550282509168002	-0.511121	1		0	-1.21294	1		0	-3.15583	1
Gm42529	0.014880983523392394	1.9530700485625987	0.000453011		0.00476164	0.00207	1		0.00483172	0.0338586	1		0.003119	-0.676139	0.9936495120048627		0.00122043	-1.76647	0.4725651233357902		0.00449882	0.2160240149389816	1		0.00371156	0.19791599390583414	1		0.00250762	-0.722757	1		0.010428565036045442	2.1006294562711147	1		0	-0.850581	1
Gm28370	0.13494346422349013	1.405487342234717	0.000455325		0.0492036	-0.314882	0.9457605653410784		0.0442541	-0.495948	0.4666583236906121		0.056439	-0.0426275	1		0.0588856	0.0329269	1		0.1417126996044741	1.354062216742249	0.9797692992332144		0.0296925	-0.890127	1		0.0351067	-0.735803	0.9517595878321609		0.010428565036045442	-1.49196	1		0.00813683	-2.43347	1
4930453C13Rik	0.010146125129585723	2.0283901395105515	0.000459477		0.00376963	0.38325575743468576	0.9642408007785861		0.00252567	-0.374226	0.8628703758098446		0.00237638	-0.420076	1		0.000610213	-1.91422	0.44547913603935996		0.00224941	0.0682704	1		0.00185578	0.2063282337220329	1		0.00100305	-1.14206	0.9400363434852574		0	1.6897676329634637	1		0	-0.253128	1
Clmp	0.15489751031167537	1.397416733417296	0.000463742		0.0638853	-0.0860213	1		0.0598474	-0.205507	0.8842949077378505		0.0552508	-0.325964	1		0.0527834	-0.361474	1		0.13046565995332537	1.0120898324680505	1		0.0408272	-0.656993	1		0.0361097	-0.906222	0.7893711271120044		0.020857130072090883	-1.1116	1		0.00542455	-3.0545	1
Ascl4	0.0869185	1.4327658829641416	0.000469199		0.027677018735954458	-0.538123	0.588632		0.0407402	0.20417523197812049	0.847601		0.027476895297995466	-0.495107	0.9760962066115878		0.025628945373018328	-0.548062	0.8652362790652683		0.0686069	0.9527614969945244	1		0.025980922093905106	-0.411443	1		0.0346051	-0.073326	1		0.020857130072090883	-0.250467	1		0.00813683	-1.77723	1
Gm47368	0.00946972	2.13211	0.000472984		0.00327363	0.34357846373950984	0.9843765623892758		0.00164718	-0.87857	0.44940739903073706		0.00207933	-0.430724	1		0.000610213	-1.7379	0.5659064120956242		0.00562352	1.288536514723349	1		0.00185578	0.38100676513498044	1		0.00150457	-0.536197	1		0	1.8628323419363442	1		0	-0.0800629	1
Gm37165	0.0368643	1.5575853467051548	0.000474154		0.019740956015967516	0.6509442644239805	0.29217		0.00845551	-0.964006	0.0501414		0.009357	-0.736163	0.6249499212505449		0.00396638	-1.87727	0.0810879		0.032616414988331344	1.2503755197297588	1		0.018557801495646505	0.48462939620913836	1		0.0120366	-0.237398	1		0.020857130072090883	1.0840465720755104	1		0	-2.4493	1
Serpind1	0.016233800207337157	1.9384232725981967	0.000482188		0.00565444	0.15653188393713968	1		0.00252567	-1.24298	0.0739933		0.00415867	-0.36893	1		0.00274596	-0.86487	0.848498		0.00899763	0.957712	1		0.00556734	0.48462939620913836	1		0.00651981	0.4247814461130206	1		0.010428565036045442	1.9654020755768915	1		0	-0.985066	1
Gm28198	0.34902670445774886	1.3948901497031616	0.000489595		0.13530986937577735	-0.208649	0.984889		0.12265973149711247	-0.38206	0.6435099147319652		0.1369389052148747	-0.164987	1		0.1342468567158103	-0.178036	1		0.29917125472055645	1.0310274375662587	1		0.0835101	-0.830878	1		0.11183978786498379	-0.444613	1		0.0625714	-1.06146	1		0.027122771888484255	-2.35122	1
Gm42982	0.0578329	1.4856832311453765	0.000491421		0.021228967775965068	-0.218084	0.9873670243337859		0.016801198674179237	-0.63032	0.3119508916804064		0.022130039996763915	-0.119006	1		0.019221709029763747	-0.313815	1		0.0539858	1.2564186025325421	0.9797692992332144		0.018557801495646505	-0.229271	1		0.0245747	0.0770203	1		0	-1.20958	1		0	-3.15247	1
1700095B10Rik	0.010822533471558104	2.036125788290157	0.00049514		0.00337283	0.0344915	1		0.00153736	-1.28362	0.0941834		0.00401014	0.3593168366762969	1		0.00152553	-0.964406	0.7959327903469624		0.00224941	-0.0184412	1		0.00556734	1.1444004845788323	1		0.00200609	-0.467555	1		0	1.6045203463449527	1		0	-0.338375	1
Gm17606	0.0257035	1.6366291399070914	0.000505366		0.010019279183983513	0.0597855	1		0.00735739	-0.508035	0.6291957679091659		0.00787176	-0.352114	1		0.00396638	-1.28104	0.49929181702482456		0.0224941	1.3164259118968191	1		0.014846241196517205	0.7786906976635573	1		0.00702133	-0.405091	1		0	0.0717333	1		0	-1.87116	1
Gm50071	0.0622296	1.4565455125090265	0.000509008		0.022717	-0.259512	0.9734728969957556		0.020095551355390852	-0.472398	0.5750709089813104		0.025546086439217405	-0.0247548	1		0.018916602537227815	-0.476511	0.9394432410297932		0.0641081	1.3784696423964795	0.9797692992332144		0.012990461046952553	-0.823419	1		0.0215655	-0.253152	1		0	-1.33819	1		0	-3.28108	1
Gm15494	0.0257035	1.7616866191841138	0.000509556		0.00922567	0.0304857	1		0.00603965	-0.73156	0.3742111099079116		0.00712914	-0.403024	1		0.00671234	-0.422228	1		0.024743487232527225	1.5602622715514327	0.9797692992332144		0.0092789	0.27988484069211506	1		0.00300914	-1.43934	0.6462658240345243		0.020857130072090883	1.7626681800109116	1		0	-1.77396	1
Cntd1	0.0338204	1.5757422098420815	0.000510702		0.012697700351979105	-0.0794599	1		0.00889475	-0.714699	0.26964593665370923		0.00950552	-0.552782	0.9810223948380682		0.00640724	-1.05878	0.5989851523212226		0.0224941	0.8534539355542741	1		0.016702021346081855	0.48462939620913925	1		0.0255777	1.0521326867617589	0.23305954218625605		0.010428565036045442	0.6343908759270906	1		0.00813683	-0.302455	1
Gm47889	0.0744049	1.448120084606575	0.000512554		0.025891404623957396	-0.358493	0.9457605653410784		0.023938962816804403	-0.487388	0.5309581562802326		0.031487036773919126	0.0204768	1		0.0259341	-0.276493	1		0.0618587	1.046099013496669	1		0.0371156	0.32040000043082895	1		0.0245747	-0.335786	1		0.0312857	0.4021154715072379	1		0.00542455	-1.9571	1
4931413K12Rik	0.037202458808480984	1.529807782022024	0.000518895		0.016467330143972902	0.20144991185375538	0.9873670243337859		0.010981175604038718	-0.558775	0.47423451727237237		0.0121789	-0.342347	1		0.00915319	-0.719161	0.7839358790091443		0.026992895162756974	0.936116	1		0.012990461046952553	-0.0187735	1		0.0100305	-0.53689	1		0	-0.541558	1		0	-2.48445	1
Celf3	0.010484329300571913	2.0912673424826176	0.000523245		0.00287682	-0.154734	1		0.00230605	-0.530784	0.7728366617493356		0.00207933	-0.629503	1		0.000610213	-1.91422	0.484976		0.00449882	0.8309990847265771	1		0.011134680897387903	2.0783888451674537	1		0.00351067	0.3382724528583463	1		0	1.6897676329634637	1		0	-0.253128	1
Gm17233	0.025365312823964307	1.6229878219267944	0.000525035		0.012598499567979269	0.5572851572097353	0.5975368575343353		0.00735739	-0.497911	0.6413553381777427		0.00608947	-0.761989	0.6823972933274981		0.00396638	-1.27253	0.49174867922276877		0.011247	0.3492905458024458	1		0.011134680897387903	0.41612061827884883	1		0.00551676	-0.731268	1		0	0.0799305	1		0	-1.86296	1
Gm48249	0.0257035	1.6629084647059402	0.000539992		0.00853127	-0.225839	0.9925461524413124		0.00702795	-0.563006	0.5650735796563747		0.010396663085728014	0.1526235697308156	1		0.00671234	-0.50417	0.9781113793538994		0.0168706	0.9241084891180584	1		0.011134680897387903	0.42872065505848234	1		0.00351067	-1.32047	0.6847410371471107		0.010428565036045442	1.0964658313295779	1		0	-1.85058	1
Olfr172	0.015557391865364775	1.8783022801606268	0.000542934		0.00545604	0.10590581086717155	1		0.00329435	-0.794313	0.4050565411087358		0.00460424	-0.181963	1		0.00122043	-1.88846	0.36991959464410745		0.010122335686033865	1.1335618547470085	1		0.00556734	0.500059	1		0.00501524	0.0687758	1		0	0.9730152596867665	1		0	-0.96988	1
S100a7a	0.00913151	2.0621209968231016	0.000550271		0.00307522	0.21489295976265765	1		0.00197661	-0.580017	0.7487588549616983		0.00222786	-0.321126	1		0.00122043	-0.971786	0.8151877798209919		0.00224941	0.2445931671357524	1		0.00185578	0.38100676513498044	1		0.00150457	-0.536197	1		0	1.8628323419363442	1		0	-0.0800629	1
Gm47077	0.0172484	2.107208886351639	0.000554828		0.00347203	-0.70384	0.8400922951448736		0.00384341	-0.504106	0.7981595697670706		0.00371309	-0.50866	1		0.0045766	-0.0968564	1		0.011247	1.3034868561893207	1		0.00742312	0.8533517025754422	1		0.00250762	-0.821723	1		0.0417143	3.3493911385965056	1		0.00271228	0.060981	1
Atxn7l1os2	0.0537745	1.463438192149602	0.000567905		0.023411385023961475	0.093512	1		0.0194367	-0.261389	0.8433131107165828		0.016783184695532364	-0.486162	0.9936495120048627		0.0161706	-0.484449	0.9277367116411397		0.0337411	0.6540568215900047	1		0.024125141944340456	0.21176211977266224	1		0.0120366	-0.877694	0.871099		0	-1.12295	1		0.00542455	-1.47731	1
4930403P22Rik	0.0341586	1.5748095253079164	0.000570914		0.012102495647980086	-0.192691	1		0.00966343	-0.58925	0.45846974605863267		0.0121789	-0.154195	1		0.0109838	-0.276905	1		0.026992895162756974	1.1018529950196712	1		0.00742312	-0.545744	1		0.0125381	-0.0487507	1		0.010428565036045442	0.6193783050720656	1		0	-2.3265	1
Phykpl	0.48870502707504565	1.3734128517560054	0.000581299		0.22161455145563533	0.0776002	1		0.16383914001225766	-0.48875	0.4101875776145109		0.1731787022565552	-0.360692	1		0.13119579179045096	-0.752816	0.6702381212286029		0.35990526883675966	0.7828589972202886	1		0.23753985914427528	0.16627498420159492	1		0.21314757776958793	0.00151971	1		0.16685704057672707	-0.282666	1		0.0840806	-1.3102	1
Taco1	0.6709970752366025	1.393431005356758	0.000581397		0.1978063632956745	-0.716556	0.12689371728297416		0.15362664670050166	-1.12604	0.00119021		0.1525338998434667	-1.07238	0.020746046942865144		0.11899153208901367	-1.36231	0.16799097816657432		0.25193368818573175	-0.20071	1		3.314423347122466	3.764057749516817	3.15305452896764e-08		0.21615672004398212	-0.440386	1		12.263992482389439	5.559359810798685	2.2292602534227932e-06		0.0650947	-2.10974	1
Gm42836	0.011837145984516677	2.0989209150260537	0.000587652		0.000496004	-3.00459	1.7998971039804656e-05		0.00428266	0.3944483423508869	0.8169396647117386		0	-4.88941	1.124028357659063e-05		0.000305106	-2.679	0.24231275642498742		0.00562352	0.934253	1		0.00371156	0.6354960618357657	1		0.020562472208360247	3.026045759163276	7.929241466249296e-07		0	1.5240304284845854	1		0	-0.418865	1
Sycp3	0.0649352	1.4779893023678592	0.000587741		0.023212983455961803	-0.276512	0.9663091059542398		0.024597833353046727	-0.159064	0.9497174144113415		0.021832992480028828	-0.348209	1		0.021357454477515275	-0.338221	1		0.041614046709250334	0.6903274636375132	1		0.0352598	0.4724030938758794	1		0.019057901071163157	-0.480973	1		0.010428565036045442	-0.380622	1		0.010849108755393702	-0.997101	1
Gm49226	0.043290133886232415	1.5406157102977573	0.000590311		0.0161697	-0.126431	1		0.0159227	-0.149684	0.9746786025551322		0.0150009	-0.236424	1		0.00915319	-0.939127	0.663947		0.0281176	0.7775143815416277	1		0.00742312	-0.914978	1		0.0125381	-0.432813	1		0.020857130072090883	0.839449	1		0	-2.69304	1
Btla	0.024350700311005734	1.707625039479308	0.000594431		0.00892807	0.0144537	1		0.00603965	-0.688968	0.42131991969504795		0.00519833	-0.873164	0.5844746055949097		0.00274596	-1.64709	0.3398790391393086		0.019119967406952855	1.2207464251813853	1		0.00556734	-0.278194	1		0.019559424783562186	1.270429807077294	0.14260994927347045		0	0.20434080579322167	1		0.00271228	-0.734067	1
Gm33037	0.041260908860315276	1.540402897261223	0.000595234		0.0165665	0.015490515644952296	1		0.014604963553371495	-0.221287	0.9043621385509912		0.0111393	-0.652623	0.8028456654038787		0.011594046716365434	-0.515135	0.9332532689951542		0.032616414988331344	1.065719208965957	1		0.018557801495646505	0.30635705205330677	1		0.0100305	-0.681941	1		0	-0.681488	1		0	-2.62438	1
D630008O14Rik	0.010822533471558104	2.052245453653434	0.000596127		0.00406723	0.43502940715873795	0.9457605653410784		0.00142755	-1.38316	0.0698988		0.00207933	-0.712759	0.9936495120048627		0.000610213	-1.98886	0.46384043967735905		0.00787293	1.4705968420245785	1		0.00556734	1.1565751985249344	1		0.00401219	0.4429059940489388	1		0	1.6163944466332447	1		0	-0.326501	1
Rbm20	0.0405845	1.5351692628263107	0.000600611		0.0158721	-0.0425353	1		0.013397034236927235	-0.354199	0.7728366617493356		0.012624519461241159	-0.423461	1		0.013729792164116962	-0.237591	1		0.029242303092986723	0.9265173977439973	1		0.016702021346081855	0.18622066027345952	1		0.0085259	-0.891733	0.911775		0.010428565036045442	0.3405008294855909	1		0.00271228	-1.60239	1
Gm21885	0.0128518	1.8501237468490324	0.000600998		0.00466244	0.14224765793089222	1		0.00395322	-0.168688	0.981267		0.00282195	-0.685537	0.9936495120048627		0.00274596	-0.585894	0.9427714082180884		0.00337411	0.018084637327072883	1		0.00185578	-0.264563	1		0.00250762	-0.588664	1		0	1.2223747286234836	1		0	-0.720521	1
Lrrc4c	0.018939433575226684	1.7390459513903709	0.000603868		0.00624965	-0.158922	1		0.00472191	-0.64862	0.4965051502866899		0.00683209	0.0253547	1		0.00518681	-0.354569	1		0.00899763	0.572545	1		0.00185578	-0.903296	1		0.00551676	-0.204521	1		0	0.5868904523231615	1		0.00271228	-0.350152	1
Gm11437	0.011498941813530486	2.058278930528708	0.000604422		0.00287682	-0.357826	0.9873670243337859		0.00197661	-0.969059	0.3523423955188665		0.00445571	0.46130398922130755	1		0.000610213	-2.07132	0.42213613461222405		0.00562352	0.9459348515712378	1		0.012990461046952553	2.1203550106121822	1		0.00100305	-1.29916	0.9351117598303946		0	1.5352576839078393	1		0	-0.407638	1
Prss12	0.01319	2.024153146624081	0.000612284		0.00386883	-0.0947915	1		0.0018668	-1.3101	0.0898757		0.00356457	-0.200111	1		0.00183064	-1.03152	0.8061364362530384		0.012371743616263612	1.7799249001323076	0.9819617454520244		0.0092789	1.45426	1		0.00351067	-0.0565872	1		0	1.3160891634456773	1		0	-0.626806	1
Prol1	0.00608768	2.8735312835773916	0.000612366		0.00109121	-0.220322	1		0.000768682	-0.757555	0.7904389015987356		0.000891143	-0.42838	1		0.000305106	-1.20257	0.8969749425442883		0.00224941	1.396596260580802	1		0	0.48462939620913836	1		0.000501524	-0.430402	1		0	2.9806688322302017	1		0	1.037773579533134	1
Gm13817	0.018263	1.657614165036427	0.000614128		0.00744006	0.16962409686219715	1		0.00538078	-0.435627	0.754514		0.00579243	-0.2705	1		0.00244085	-1.42197	0.44881521341126573		0.015745855511608235	1.33386	1		0	-1.92078	1		0.00451371	-0.491803	1		0	0.5752557518397579	1		0	-1.36764	1
Cnmd	0.015895596036350965	1.918800146477853	0.000614386		0.00386883	-0.542251	0.9455071295329556		0.0037336	-0.582468	0.6922900779469302		0.00490128	-0.0761219	1		0.000915319	-2.21816	0.24565989655146442		0.024743487232527225	2.443344519772282	0.9797692992332144		0.00556734	0.500059	1		0.00300914	-0.615185	1		0.010428565036045442	1.9806688322302017	1		0	-0.96988	1
Leng9	0.27563639935374545	1.3470459323136126	0.000617368		0.11755292903980656	-0.0754202	1		0.0893868	-0.574337	0.2947964236973488		0.1252055283038388	0.0452552	1		0.10526173992489671	-0.230929	1		0.15745855511608234	0.38538486862417853	1		0.14846241196517204	0.3012511298754972	1		0.0792407	-0.645506	1		0.13557134546859073	0.24260738154272277	1		0.0244105	-2.18703	1
Trcg1	0.021645066943116208	1.784853389582648	0.00061753		0.00704326	-0.13786	1		0.00592983	-0.44217	0.7636256610071896		0.0056439	-0.481524	1		0.00396638	-0.905072	0.7773676781404293		0.014621151546493362	1.0774187767094752	1		0.012990461046952553	0.9731290574290039	1		0.00601828	-0.245319	1		0.020857130072090883	2.027463043709143	1		0	-1.51093	1
Gm15868	0.00574947	2.609115647345237	0.000622037		0.00158721	0.36464	0.9974718835175321		0.000768682	-0.861891	0.7015536310219386		0.000297048	-1.87818	0.4125165233327545		0.000305106	-1.29371	0.8061364362530384		0.00224941	1.3034868561893198	1		0.00371156	2.039218247886775	1		0.00100305	0.09316	1		0	2.891401494133114	1		0	0.9485062414360463	1
Cbs	0.0135282	1.8524520831072957	0.000628169		0.00386883	-0.313432	0.9873670243337859		0.00318454	-0.637261	0.6054555015551377		0.00356457	-0.394198	1		0.00366128	-0.254689	1		0.00787293	0.981559	1		0.00742312	1.0124181885430614	1		0.00501524	0.2579708247674848	1		0	1.1515533914337865	1		0.00271228	0.21732299986384618	1
Olfr1427	0.00439665	3.203476846068644	0.000629475		0.000496004	-0.694254	0.983066		0.000658871	-0.213234	1		0.000297048	-1.10057	1		0.000305106	-0.536985	1		0.00224941	2.081094434852872	1		0	1.1323276522782564	1		0	-0.813731	1		0	3.6283670882993198	1		0	1.685471835602252	1
Inca1	0.1318996266846144	1.37608	0.000631829		0.060115675103901076	0.0895741	1		0.049305478462133845	-0.288957	0.794409		0.0461909	-0.377415	1		0.0363077	-0.705804	0.7407137266809464		0.0967245	0.7886027912043052	1		0.061240744935633466	0.13091393825931386	1		0.0361097	-0.684962	0.9993914771484494		0.0312857	-0.481551	1		0.013561385944242128	-1.83809	1
Gm46555	0.00642588	2.59606	0.000653209		0.00148801	0.00708807	1		0.00109812	-0.499757	0.8749885136476784		0.00103967	-0.492892	1		0.000610213	-0.848929	0.984826		0.0011247	0.5221271426646616	1		0.00185578	1.257858534362116	1		0	-1.71419	0.8886534701312443		0	2.7279027618502356	1		0	0.7850075091531661	1
Gm26724	0.5347007943291676	1.3602023497560962	0.000663953		0.22171375223963516	-0.115755	1		0.18788791458510246	-0.417607	0.5593217132567204		0.21298306949905674	-0.172707	1		0.19953964611849984	-0.256606	1		0.5016179684412337	1.136792976010022	0.9797692992332144		0.1614528730121246	-0.535289	1		0.15697692198089652	-0.60675	1		0.0625714	-1.70519	1		0.016273663133090553	-3.64809	1
Kdm6bos	0.014542779352406204	1.8137333669537092	0.000673832		0.00496004	-0.018217	1		0.0018668	-1.64074	0.00485048		0.00504981	0.031932	1		0.0048817	0.024754698235662786	1		0.012371743616263612	1.4621846022083789	1		0.011134680897387903	1.378967619861382	1		0.00250762	-0.797611	1		0	1.0195578456237966	1		0	-0.923337	1
Sap30bpos	0.011498941813530486	2.012954940019217	0.000673832		0.00406723	0.2651044057164258	0.9897188641374138		0.00230605	-0.757555	0.554142		0.00267343	-0.450434	1		0	-3.71243	0.048173866176419354		0.00899763	1.5308973522923948	1		0.00742312	1.3724616560019722	1		0.00150457	-0.90684	1		0.010428565036045442	2.512889870879385	1		0	-0.441061	1
Gm50103	0.019277637746212873	1.7122091403093407	0.000678637		0.00724166	0.0662988	1		0.00483172	-0.664873	0.46795396277606144		0.00504981	-0.536802	1		0.00579702	-0.239719	1		0.010122335686033865	0.6829004457374435	1		0.00556734	0.0619383	1		0.00702133	0.0871612	1		0	0.5409042470489815	1		0.00271228	-0.396322	1
Peak1os	0.020968658601143827	1.6860776291601214	0.000680752		0.00734086	-0.100028	1		0.00669852	-0.26279	0.885751		0.00401014	-1.05951	0.2957634820931839		0.00305106	-1.30172	0.5448086181969843		0.010122335686033865	0.5379521098263442	1		0.00371156	-0.499941	1		0.017051806221567035	1.274075740382103	0.14777602664582457		0.010428565036045442	1.405974666962872	1		0	-1.54206	1
Gapdhs	0.0798162	1.4079871463672191	0.000685817		0.0330339	-0.0686393	1		0.026574444961773698	-0.466464	0.5650735796563747		0.031189989257184043	-0.158491	1		0.025628945373018328	-0.438285	0.9618010842602069		0.0764799	1.223422467260142	0.9797692992332144		0.022269361794775806	-0.516551	1		0.0225686	-0.600024	1		0.020857130072090883	-0.147737	1		0.00542455	-2.09063	1
Gm14091	0.00541127	3.11162	0.000685843		0.000496004	-1.09479	0.9122062662019452		0.000219624	-2.02059	0.25297352304717063		0.000297048	-1.46314	0.9798588126931184		0	-1.92693	0.7773676781404293		0	0.0555593	1		0.00371156	2.454255747165619	1		0.00501524	2.745236651601508	0.0375431		0	3.287330170464254	1		0	1.3444349177671846	1
Vmn1r12	0.00608768	2.3052475240028665	0.000686383		0.00138881	-0.283058	1		0.00120793	-0.49452	0.8345450668206225		0.00118819	-0.436178	1		0.000915319	-0.536985	1		0.00449882	1.7925249369119411	1		0	0.10848091032388929	1		0.00100305	-0.204521	1		0	2.6045203463449527	1		0	0.6616250936478849	1
Ccn6	0.00574947	2.7955287715761186	0.000696013		0.000694405	-0.920762	0.9455071295329556		0.000658871	-0.9502	0.7017892991881844		0.000891143	-0.392756	1		0	-2.20257	0.6643157160241636		0.00337411	1.8772221014872237	1		0	0.515656	1		0.00300914	1.5785867821920547	0.544634		0	3.0116957278508254	1		0	1.0688004751537576	1
Gm45877	0.00372025	2.8986222645402213	0.000696385		0.000396803	-0.957288	0.9323437351381494		0.000878494	0.3419809224567505	0.981267		0.000445571	-0.578622	1		0.000305106	-0.486359	1		0	0.44550586106174883	1		0.00185578	2.2318633258291705	1		0	-0.764821	1		0	3.6772766887802666	1		0	1.7343814360831988	1
Gm15872	0.0128518	1.9488080217084391	0.000696803		0.00436483	0.11502618919586638	1		0.00219624	-1.07673	0.18988920496890713		0.00341605	-0.29322	1		0.00274596	-0.506823	1		0.00787293	1.1335618547470085	1		0.00742312	1.1614739979377742	1		0.00150457	-1.11629	0.9993914771484494		0.020857130072090883	2.9010516641668334	1		0	-0.646042	1
Gm48283	0.0311148	1.5510683619773653	0.000698662		0.014681716031975841	0.35980692553139626	0.9455071295329556		0.00845551	-0.681606	0.3170140340320458		0.010545186844095557	-0.262846	1		0.00640724	-0.954282	0.6583336473303617		0.023618783267412354	1.0282088546007797	1		0.011134680897387903	0.0619383	1		0.00451371	-1.3597	0.5163414669623889		0	-0.268873	1		0.00271228	-1.20854	1
Gm13833	0.011160737642544296	2.1281041106629894	0.000708155		0.00357123	0.1817760221175302	1		0.00175699	-1.0486	0.33669041016773804		0.0025249	-0.394758	1		0.00122043	-1.21506	0.7773676781404293		0.00562352	1.042959305966102	1		0.00371156	0.7415376992460905	1		0.00250762	-0.167368	1		0.010428565036045442	2.6404399205998947	1		0	-0.314528	1
Gm13964	0.00642588	2.520110641286492	0.000710682		0.000595205	-1.52844	0.3211029261062869		0.00120793	-0.405253	0.9260616915011383		0.000594095	-1.31114	0.8059921328042332		0.000305106	-1.51189	0.7816376711970658		0.00337411	1.5221271426646616	1		0.00371156	1.8168258265503274	1		0.00551676	2.123533604065333	0.0703922		0	2.6772766887802666	1		0	0.7343814360831988	1
Vinac1	0.00946972	2.1127470698930697	0.000734755		0.00238082	-0.295284	0.9975319794320643		0.00307473	0.19353564842489135	0.9737348212504969		0.00163376	-0.816782	0.9936495120048627		0.000610213	-1.75225	0.5796358967257107		0.00562352	1.2737395127952684	1		0.00371156	0.9659692658561374	1		0.00100305	-0.980089	1		0	1.8487571567246208	1		0	-0.0941381	1
St6galnac2	0.015219187694378584	1.7687419819933128	0.000736092		0.00634885	0.34261377293734085	0.9567293115069778		0.00263548	-1.21804	0.0461101		0.00445571	-0.299026	1		0.0045766	-0.17885	1		0.00787293	0.7412444319682479	1		0.00185578	-0.568112	1		0.00351067	-0.469082	1		0	0.920548	1		0.00542455	0.577412	1
Ptger4	0.1315614225136282	1.369815890303804	0.000756959		0.0346211	-0.939036	0.019613042357822658		0.072915	0.47703812384781186	0.3718348925065281		0.0204963	-1.68034	6.136986758168888e-05		0.012509366193973233	-2.27821	0.00282166		0.0888516	0.661074	1		0.031548262542599056	-0.799285	1		0.1765363467644587	1.8043036817401004	7.121307973986506e-05		0.0417143	-0.160319	1		0.1166279191204823	1.0616900859905676	1
Cldn18	0.011837145984516677	2.1143509555956586	0.000778132		0.00317443	-0.175928	1		0.00175699	-1.15552	0.23604750736106264		0.00282195	-0.324439	1		0.00274596	-0.251894	1		0.00562352	0.9459348515712378	1		0.012990461046952553	2.1203550106121822	1		0.000501524	-1.89552	0.7211647480375816		0.0312857	3.5694733992457524	1		0	-0.407638	1
Crb1	0.00541127	2.6641570109031987	0.000781836		0.000992008	-0.345853	1		0.000878494	-0.513629	0.8531698174012341		0.000594095	-0.948572	1		0.000305106	-1.17086	0.8643490355273374		0.00449882	2.2330975282979226	1		0.00371156	2.1647491299706347	1		0	-1.4304	1		0	3.0116957278508254	1		0	1.0688004751537576	1
Tsnaxip1	0.0172484	1.9079000781282325	0.00078597		0.00525764	-0.13786	1		0.0037336	-0.732608	0.5285307637861445		0.00415867	-0.495935	1		0.0048817	-0.161397	1		0.00787293	0.6668622356456719	1		0.00185578	-0.640262	1		0.00651981	0.3080578398113376	1		0	0.8487571567246208	1		0.00542455	0.5048995899604307	1
Asmt	0.0547891	1.4813737379460248	0.000796804		0.0262882	0.31663470635650715	0.9457605653410784		0.011969481408402202	-1.11779	0.010215141435621121		0.016337613420429737	-0.545246	0.9696959612476688		0.00884809	-1.3905	0.302005		0.0573599	1.4264977462946646	0.9797692992332144		0.0872217	2.039218247886776	1		0.016048758796768973	-0.475314	1		0.0834285	2.0487578220723717	1		0.00271228	-2.07652	1
Spam1	0.00980792	1.96421	0.000797533		0.00416643	0.6010802750894202	0.8129358380445872		0.00197661	-0.787612	0.5036713027466597		0.00222786	-0.522039	1		0.00122043	-1.15149	0.7304427210710738		0.00449882	0.8309990847265771	1		0.00185578	0.2063282337220329	1		0.000501524	-1.73973	0.6511310225585808		0	1.6897676329634637	1		0	-0.253128	1
A930037H05Rik	0.5593896988111595	1.3562208060332948	0.000797533		0.1540588175517465	-0.87358	0.0213926		0.3962008157937169	1.016254503497315	0.000612138		0.11570000776831604	-1.25563	0.00375385		0.1070923788801123	-1.27858	0.21570104077712726		0.49936856051100403	1.0579501731428558	1		0.1948569157042883	-0.332867	1		0.18405920245044416	-0.439577	1		0.1772856056127725	-0.40921	1		0.016273663133090553	-3.71646	1
Bcas3os2	0.0219833	1.6762298432037745	0.000797615		0.00773766	-0.0997635	1		0.00845551	0.0749885	1		0.00490128	-0.829639	0.6521743358428317		0.00518681	-0.6332	0.8924506823330599		0.0168706	1.169060535968395	1		0.00371156	-0.575492	1		0.00351067	-1.08177	0.883055		0.010428565036045442	1.3306865396586351	1		0	-1.61709	1
Nap1l5	0.00744049	2.363290531543667	0.000806243		0.00168641	-0.246795	1		0.00153736	-0.386717	0.9160520618687671		0.00103967	-0.90055	0.9936495120048627		0.00152553	-0.160131	1		0.00337411	1.1949623994111516	1		0	-0.130707	1		0.00150457	-0.0153645	1		0	2.365332682465527	1		0	0.42243742976845766	1
1700112J05Rik	0.00879331	2.1299478106466774	0.000806362		0.00317443	0.4317542751258774	0.9498935544257268		0.00175699	-0.651945	0.7030921500643952		0.00163376	-0.685537	1		0.000915319	-1.20257	0.7727536792025205		0.00562352	1.396596260580802	1		0	-0.530637	1		0.000501524	-1.46143	0.871099		0	1.9654020755768906	1		0	0.022506822879822863	1
Cep112os1	0.00946972	2.1127470698930697	0.000806656		0.00277762	-0.00619762	1		0.00153736	-1.00447	0.3459924512151109		0.00193081	-0.562681	1		0.00152553	-0.708751	0.979334		0.00899763	1.903556249300686	0.9902133188032591		0.00185578	0.366793	1		0.00250762	0.0634126	1		0	1.8487571567246208	1		0	-0.0941381	1
Gm15392	0.012513554326489058	1.848869229343122	0.00080981		0.00476164	0.23788293698139995	1		0.00384341	-0.172592	0.981267		0.00282195	-0.643717	0.9936495120048627		0.00122043	-1.59548	0.5120013640337867		0.00674822	0.8916732577847641	1		0.00371156	0.3667929059152808	1		0.00150457	-1.15477	0.9236394028991775		0	1.2591332786336018	1		0	-0.683762	1
Prkar2b	0.011837145984516677	2.0989209150260537	0.000810313		0.00307522	-0.25007	1		0.00241586	-0.653532	0.7004595335042471		0.00193081	-0.928809	0.9142891894373101		0.00244085	-0.427942	1		0.011247	1.8681007115186743	0.9862338045678373		0.00185578	0.0392182	1		0.00351067	0.16242261745892783	1		0	1.5240304284845854	1		0.00271228	0.5923624312107698	1
CT009536.1	0.0537745	1.4283023297601884	0.000822231		0.021526570127964578	-0.112728	1		0.0214133	-0.117833	0.9939797351961707		0.0184169	-0.363609	1		0.015560431119332557	-0.572889	0.8545512291634119		0.039364638779020585	0.8495303676181756	1		0.012990461046952553	-0.634974	1		0.017553329933966064	-0.360797	1		0	-1.15124	1		0	-3.09414	1
Gm29017	0.00710229	2.550698961119915	0.00082489		0.00218242	0.5306500307062691	0.9465191340267941		0.000439247	-1.99634	0.0750545		0.000742619	-1.1512	0.9790518690754486		0.000305106	-1.6332	0.7773676781404293		0.00337411	1.396596260580802	1		0.00185578	1.0850219374998993	1		0.00200609	0.5324450005473338	1		0.010428565036045442	3.5810613735209644	1		0	0.6150825077108539	1
Gm26916	0.045995767254121946	1.444625736141675	0.000833278		0.019344152879968168	0.00207	1		0.013397034236927235	-0.66554	0.266891		0.018268422279207795	-0.0939112	1		0.0186115	-0.0422202	1		0.049487	1.4399888560941827	0.9797692992332144		0.00371156	-1.82083	1		0.00752286	-1.32469	0.46132959985830024		0	-0.913891	1		0	-2.85679	1
Dmd	0.027394537849881453	1.5696737419750875	0.000834631		0.00962248	-0.215407	0.9975152023158057		0.00735739	-0.683554	0.34313880254072265		0.011436329394300815	0.11720089487927066	1		0.00671234	-0.679004	0.8388553417563137		0.0202447	1.0122555585248758	1		0.018557801495646505	0.9287942581931254	1		0.00802438	-0.366272	1		0.010428565036045442	0.9316313389216475	1		0	-2.01497	1
Cntnap5b	0.011498941813530486	1.9835111621267352	0.000840777		0.00357123	-0.0258194	1		0.00131774	-1.65405	0.021063737666135642		0.00282195	-0.389144	1		0.00427149	0.3330689817599497	1		0.00787293	1.326206932689404	1		0.00371156	0.5907577470704828	1		0.00351067	0.11588003152189685	1		0.010428565036045442	2.490863564549385	1		0	-0.46292	1
Mcmdc2	0.061215	1.4348733507881466	0.000851532		0.025196999135958537	-0.0503974	1		0.019985739599350467	-0.474516	0.5868543951414192		0.0227241	-0.220575	1		0.014034898656652894	-0.918831	0.6322294698592195		0.0686069	1.4878453229467565	0.9797692992332144		0.031548262542599056	0.36836532573403424	1		0.019559424783562186	-0.390656	1		0	-1.33202	1		0	-3.27492	1
Fhad1os2	0.00913151	2.14119	0.000851532		0.00248002	-0.124745	1		0.00208642	-0.417479	0.8444205014844983		0.00103967	-1.38598	0.45451572113719774		0.000915319	-1.24886	0.7426726873637234		0.00562352	1.349290545802445	1		0.0092789	2.08502	1		0.00200609	-0.139501	1		0.010428565036045442	2.9353448417207106	1		0.00271228	0.9924495890236429	1
Gm15813	0.00574947	2.4835847652613774	0.000854748		0.00138881	-0.0138715	1		0.000988306	-0.57313	0.8257681005207537		0.00118819	-0.200111	1		0.000610213	-0.766467	0.9726977155201965		0.0011247	0.603047	1		0	0.31129779332357543	1		0.000501524	-0.60728	1		0	2.8073372293446406	1		0	0.864442	1
Gm38033	0.015219187694378584	1.7592192078748061	0.000861188		0.00525764	-0.0503974	1		0.00450228	-0.328711	0.8628499706858955		0.00460424	-0.253222	1		0.00335617	-0.6332	0.9299225276394502		0.015745855511608235	1.6946776135137966	0.9797692992332144		0	-1.58283	1		0.000501524	-2.52155	0.17437815339545407		0	0.9132058644514629	1		0	-1.02969	1
Gm16178	0.025027108652978115	1.6571210202560698	0.000864119		0.00902727	-0.0717999	1		0.00735739	-0.440921	0.7636256610071896		0.00683209	-0.523266	1		0.00701745	-0.40238	1		0.024743487232527225	1.514165856961979	0.9797692992332144		0.00742312	-0.0311711	1		0.00501524	-0.813731	1		0.020857130072090883	1.719340748346811	1		0	-1.81703	1
Gm17374	0.00541127	2.4011226050694043	0.000872489		0.00198402	0.7569575020461006	0.8741575404192837		0.000549059	-1.40525	0.2388175206250583		0.00133671	0.017480863134904823	1		0	-2.37944	0.49496331726468895		0	-0.396953	1		0.00185578	1.366792905915279	1		0	-1.60728	0.8024185078278612		0	2.8348179657667467	1		0	0.891923	1
Gm29417	0.1359580767364487	1.3478722970374313	0.000872489		0.0640837	0.12577763446299572	1		0.041399	-0.683956	0.15987182130679675		0.0567361	-0.103532	1		0.0463762	-0.40247	0.9780140586174007		0.12371743616263613	1.0873746166529425	1		0.042682943439986964	-0.44594	1		0.0366112	-0.73356	0.9585222240055966		0.0417143	-0.225629	1		0.00813683	-2.49112	1
Apc2	0.0081169	2.3725534528726335	0.000887559		0.00188481	-0.196075	1		0.000878494	-1.39498	0.2112209207869364		0.00178229	-0.222137	1		0.00122043	-0.566529	1		0.00224941	0.6405218434668907	1		0.00371156	1.376253235164346	1		0.00300914	0.7305898756371061	1		0	2.2498554650455906	1		0	0.3069602123485229	1
Gm43577	0.00946972	1.9840137557708672	0.000896158		0.00347203	0.3057463902137698	0.9873670243337859		0.000878494	-1.93813	0.00602522		0.00193081	-0.67074	0.9936495120048627		0.00152553	-0.808287	0.8881016889011402		0.00449882	0.8974944965134837	1		0.0092789	1.9099352309418096	1		0.00551676	1.0487658356633602	0.6298945787207278		0	1.7538979703831794	1		0	-0.188997	1
Gm44097	0.00744049	2.2257870077937323	0.00089908		0.00257922	0.44710223945931205	0.9567293115069778		0.00131774	-0.757555	0.6558326309132364		0.000891143	-1.22057	0.7291195118203836		0.000305106	-1.92693	0.583784		0.00562352	1.7185243554681655	1		0.00185578	0.791291	1		0.00150457	-0.116293	1		0	2.2684711432129374	1		0	0.32557589051586966	1
Gm42556	0.0970646	1.3669520050957331	0.000935501		0.0466244	0.18623160612094747	0.9873670243337859		0.030857103447348797	-0.589547	0.3126939211536935		0.040844	-0.0700106	1		0.0332566	-0.376414	1		0.0866022	1.0781249071336783	1		0.024125141944340456	-0.726127	1		0.011033521672778669	-1.94743	0.0683826		0	-2.0497	1		0.00271228	-2.99166	1
Nr2f2	0.0175866	1.7438996697415803	0.000939652		0.00486084	-0.483357	0.9455071295329556		0.0056004	-0.21092	0.9390145368616548		0.00415867	-0.671253	0.9760962066115878		0.00244085	-1.29698	0.5948590472476019		0.017995263441837984	1.6562400772138224	0.9797692992332144		0.00742312	0.5473651515571012	1		0.00401219	-0.524818	1		0.010428565036045442	1.7023676697430972	1		0.029835	2.40914	0.41215162196936844
Ict1os	0.00642588	2.1908030160335317	0.000954515		0.00178561	-0.0312886	1		0.000768682	-1.36636	0.1819354113045427		0.00163376	-0.12611	1		0.00122043	-0.357076	1		0.00337411	1.2811190431608672	1		0.00185578	0.9731290574290021	1		0.00200609	0.41508804990917625	1		0	2.4477948426575002	1		0	0.5048995899604307	1
Kcnh7	0.014542779352406204	1.9095933823612254	0.000955069		0.00466244	-0.0390821	1		0.00307473	-0.76747	0.4977584572713933		0.00297048	-0.752652	0.9760962066115878		0.00244085	-0.884118	0.8545512291634119		0.015745855511608235	1.8884493569104777	0.9797692992332144		0.00556734	0.6213657330008786	1		0.00501524	0.19503956904102804	1		0	1.0923141880591105	1		0	-0.850581	1
Gm50115	0.020292250259171446	1.6661292532348044	0.000957248		0.00833287	0.1966021873692929	0.9981660617584297		0.00538078	-0.611949	0.5266035152691355		0.00727766	-0.0545052	1		0.00335617	-1.13844	0.6300009032277544		0.010122335686033865	0.5701325155754944	1		0.012990461046952553	0.9731290574290039	1		0.00200609	-1.66706	0.45981244010720923		0.010428565036045442	1.437225600947312	1		0	-1.51093	1
Gm48960	0.09605	1.3751336739408213	0.00095728		0.0362083	-0.284567	0.9567293115069778		0.038543926370175896	-0.158589	0.9406494806589938		0.037279463350253304	-0.202399	1		0.028069797313305788	-0.612536	0.8146517993157575		0.10572217272079815	1.4026835904597172	0.9797692992332144		0.0296925	-0.421177	1		0.028085327894345705	-0.582735	1		0.020857130072090883	-0.441068	1		0.00271228	-2.96988	1
4930414N06Rik	0.3033691413746131	1.3061818757063726	0.000970617		0.1305482317437852	-0.103232	1		0.12101255515650666	-0.241673	0.8257681005207537		0.11822491166056427	-0.263154	1		0.10739748537264823	-0.385091	0.979334		0.26093131990665075	0.9609638514849519	1		0.0723754	-0.903296	1		0.10180931361700317	-0.449948	1		0.0417143	-1.41748	1		0.0461087	-1.50859	1
Gm17088	0.029761967046784788	1.5414656813418786	0.00097262		0.011705692511980737	-0.0259444	1		0.013067598968806073	0.19049316927111537	0.8975455630514344		0.00653505	-0.978786	0.2724568399097415		0.00427149	-1.47255	0.3398790391393086		0.017995263441837984	0.6974627399403355	1		0.018557801495646505	0.7844043488579509	1		0.00752286	-0.603808	1		0.020857130072090883	1.378753198227848	1		0.00813683	-0.14573	1
Gm17300	0.015895596036350965	1.7198191117514572	0.000984916		0.00595205	0.0665587	1		0.00362379	-0.815769	0.3031371279306669		0.00534686	-0.111673	1		0.00335617	-0.730666	0.8489139367717604		0.010122335686033865	0.9743632598977552	1		0.00185578	-0.668141	1		0.00601828	0.1642430530832959	1		0	0.821012	1		0	-1.12188	1
Gpld1	0.00980792	2.0685472659825344	0.0010015		0.00347203	0.3251117150807019	0.9873670243337859		0.0018668	-0.789264	0.5704732541407297		0.00178229	-0.777656	0.9936495120048627		0.000610213	-1.83551	0.5728322578205521		0.00224941	0.14698237050932939	1		0.00185578	0.28433074572330597	1		0.00501524	0.9232349535795015	0.8569277598503573		0	1.7670733591309125	1		0	-0.175822	1
4930520O04Rik	0.0077787	2.5139584143048976	0.00100727		0.00148801	-0.41672	0.9916021390027812		0.000988306	-1.04444	0.5794954281244278		0.000891143	-1.07083	0.9936495120048627		0.000610213	-1.1815	0.8703030826646309		0.00449882	1.58102	1		0.00556734	1.973129057429003	1		0.00200609	0.370694	1		0.010428565036045442	3.4267332271296693	1		0.00542455	2.089862090681587	1
Fam81b	0.00338204	3.9430163838986765	0.00100894		0.000297602	-0.542251	1		0.000109812	-1.52309	0.694292		0.000148524	-0.965645	1		0	-0.848929	1		0.0011247	2.2160240149389807	1		0	1.869293246444462	1		0	-0.076765	1		0	4.365332682465527	1		0.00271228	3.5048995899604307	1
4930517O19Rik	1.7992461896465348	1.3176116529223578	0.00101022		0.8198944797586508	0.024053344726348846	1		0.7092741322648608	-0.251253	0.8115093458919935		0.6598910584269938	-0.35603	1		0.5217321022364445	-0.684947	0.6643157160241636		1.1888120911264217	0.5701735268621215	1		1.0911987279440145	0.4370597691369484	1		0.6228924507995958	-0.398151	1		1.0741421987126805	0.4071641915933146	1		0.029835	-4.65576	1
Nlrc3	0.0666262	1.4038575727906446	0.00101802		0.027379416383954948	-0.0876718	1		0.026025386181571762	-0.179245	0.9306287516486914		0.0194566	-0.652371	0.6893918968343116		0.0109838	-1.43245	0.21725966030347635		0.0539858	0.9727528639266172	1		0.024125141944340456	-0.149194	1		0.0416265	0.5921758469400107	0.7621991025000261		0.0312857	0.525429	1		0.0244105	-0.0871177	1
Ccdc39	0.0439665	1.4563118351112747	0.0010219		0.021923373263963923	0.36789305706242725	0.9025492272333441		0.015373645845654205	-0.329498	0.7842202603768471		0.012773043219608702	-0.610165	0.8512893186618807		0.00610213	-1.6176	0.15523903023832314		0.0258682	0.5642688102917361	1		0.00742312	-1.00518	1		0.015045711371970912	-0.260983	1		0.0312857	1.1667512224001477	1		0.016273663133090553	0.037773579533133095	1
Gm39326	0.12953219748771105	1.335531944296572	0.00102432		0.0577349	-0.00163714	1		0.0510625	-0.233219	0.8626750951928387		0.0475276	-0.337205	1		0.032646394701344776	-0.873943	0.6202632503547331		0.11584450840683201	1.051185327143925	1		0.0519618	-0.109127	1		0.0466417	-0.312253	1		0.0312857	-0.488497	1		0	-4.43347	1
Gm43378	0.6581453167391272	1.3219993033738717	0.0010263		0.2919479073115196	-0.0250614	1		0.2688191787868678	-0.18064	0.8866923656258303		0.25382710305013106	-0.265751	1		0.2187613551482636	-0.470194	0.900459		0.5398579032551395	0.9003552173638447	1		0.23753985914427528	-0.311635	1		0.13791902090973338	-1.14011	0.4797002550152504		0.052142825180227205	-2.25862	1		0.013561385944242128	-4.20151	1
Sult2b1	0.0585093	1.4187336209114099	0.00103673		0.024998597567958865	0.00555899	1		0.019546492575188916	-0.449663	0.6300990631912214		0.0227241	-0.15829	1		0.015255324626796624	-0.739594	0.7511670221981473		0.0472376	0.9832372897529549	1		0.024125141944340456	0.0521573	1		0.018054853646365096	-0.453943	1		0.0312857	0.7246860491666922	1		0	-3.22302	1
9030025P20Rik	0.1285175849747525	1.331013793422502	0.00105124		0.0582309	0.0261235	1		0.0432658	-0.524163	0.40992703933895447		0.0539141	-0.111012	1		0.0469864	-0.30977	1		0.0719811	0.35287488315148474	1		0.076087	0.4421411708208036	1		0.0406234	-0.510014	1		0.020857130072090883	-0.896588	1		0.0189859	-1.42096	1
E330013P04Rik	0.00642588	2.520110641286492	0.00106266		0.00138881	-0.187901	1		0.000988306	-0.728408	0.7636256610071896		0.00148524	-0.00371336	1		0.000610213	-0.901396	0.9332532689951542		0.00337411	1.5221271426646616	1		0	0.18123725275920322	1		0	-1.76482	0.904239		0	2.6772766887802666	1		0	0.7343814360831988	1
1700058P15Rik	0.0426137	1.4443634554636597	0.00106628		0.017856141119970616	-0.00587875	1		0.012738163700684913	-0.620544	0.3450162297564943		0.017228755970634994	-0.0631002	1		0.010068514253685773	-0.855984	0.6722224704142895		0.0371152	1.126507097213059	1		0.014846241196517205	-0.112785	1		0.017553329933966064	0.00334169	1		0	-0.804592	1		0	-2.74749	1
Myo1h	0.00710229	2.3283065397834672	0.00106903		0.00198402	0.11310131227137532	1		0.00153736	-0.336091	0.9327335702883335		0.00103967	-0.855462	0.9936495120048627		0.000915319	-0.745093	0.9684855922173102		0.0011247	0.19496239941115157	1		0.00371156	1.536717907357592	1		0.000501524	-1.01536	1		0	2.405974666962872	1		0	0.46307941426580435	1
Gm16892	0.0365261	1.4671342444807838	0.00107535		0.018451345823969637	0.4077088011592256	0.847526		0.0120793	-0.419288	0.7064735977769013		0.011881900669403445	-0.411777	1		0.00701745	-1.13296	0.5263665365343674		0.021369375337182604	0.5755664016261219	1		0.00556734	-1.05354	1		0.00952895	-0.63476	1		0	-0.565405	1		0	-2.5083	1
9530034E10Rik	0.10179945546684342	1.341528439497484	0.00108144		0.0409699	-0.19572	0.9873670243337859		0.040300914466822095	-0.219266	0.8666006840854552		0.0393588	-0.241807	1		0.0347821	-0.403369	0.9781113793538994		0.0933504	1.0968213079319904	1		0.024125141944340456	-0.816095	1		0.0376143	-0.265318	1		0.020857130072090883	-0.552205	1		0	-4.08183	1
Gm44151	0.010146125129585723	2.5308904800397345	0.0010969		0.00238082	-0.0358979	1		0.00153736	-0.776664	0.7636256610071896		0.00103967	-1.25322	0.8914041684007571		0.000915319	-1.12195	0.9580522186005178		0.00224941	0.42901773827317946	1		0.00185578	0.5634848169203774	1		0.00351067	0.7181205236748891	1		0.010428565036045442	3.059524252941441	1		0	0.10050933488109592	1
Pqlc3	0.045995767254121946	1.416709921546217	0.00111019		0.018848148959968985	-0.0802989	1		0.016471763406058076	-0.326505	0.7802918023681238		0.013218614494711333	-0.664779	0.6970929164743312		0.012509366193973233	-0.672549	0.787051		0.026992895162756974	0.5252782797912339	1		0.020413581645211155	0.1750321032324953	1		0.0235716	0.3052573956303828	1		0.010428565036045442	0.0656159	1		0.0542455	1.5542273023239987	0.9367034017584966
Gm15518	0.00710229	2.3580538831775204	0.00111216		0.00168641	-0.165875	1		0.00131774	-0.568077	0.8192864155336362		0.000594095	-1.57862	0.4985194441620442		0.000610213	-1.16013	0.8444939069130702		0.00337411	1.2590927368308673	1		0.00556734	1.9948241285283226	1		0.00250762	0.6781224557429706	1		0	2.4267332271296693	1		0.00271228	1.5048995899604307	1
B230334C09Rik	0.0135282	1.9222735326048683	0.00111311		0.00476164	0.1591709609673595	1		0.00285511	-0.757555	0.5431724732103356		0.00326752	-0.473562	1		0.00244085	-0.766467	0.900459		0.011247	1.5245137355015395	1		0.00556734	0.7354374997096729	1		0.00150457	-1.21062	0.974576		0	1.2043408057932217	1		0	-0.738554	1
Rasgrf1	0.0527599	1.4096990526453137	0.00111768		0.014979318383975352	-0.766811	0.1842645608841429		0.0363477	1.0146002715343432	0.00259699		0.010099615568992928	-1.31848	0.0115758		0.00762766	-1.60792	0.13682806578653026		0.0314917	0.5375863613034344	1		0.020413581645211155	-0.0304553	1		0.017553329933966064	-0.34794	1		0.010428565036045442	-0.137168	1		0.027122771888484255	0.39536918657028775	1
Chrnb2	0.0368643	1.4901574191848646	0.00112751		0.011507290943981065	-0.516539	0.7524985824739192		0.019656304331229304	0.5326644840658616	0.3932857867773456		0.009357	-0.797046	0.5359175067804971		0.00640724	-1.25849	0.46384043967735905		0.023618783267412354	0.7239994855343159	1		0.033404	1.240021849216336	1		0.00902743	-0.706036	1		0.010428565036045442	0.4425005429879869	1		0	-2.50303	1
Rufy2	0.5485671653396014	1.313758534574651	0.00118398		0.25236679449558475	0.038523201548568586	1		0.19897890194518156	-0.407706	0.5833607088004683		0.20585392909741468	-0.320588	1		0.17543623320816118	-0.536639	0.8444939069130702		0.3486582291856109	0.5116225452076133	1		0.382291	0.6427582418881603	1		0.19760034268521798	-0.33963	1		0.5005711217301811	1.0341110461079697	1		0.0732315	-1.71955	1
Epha1	0.0213069	1.5887670019534355	0.00119407		0.00922567	0.21878921280388486	0.9873670243337859		0.00571021	-0.667708	0.40923735676669726		0.00608947	-0.508233	1		0.00610213	-0.421113	1		0.013496447581378487	0.8290008918297342	1		0.014846241196517205	1.0143863949068406	1		0.00501524	-0.632284	1		0	0.3016380071481368	1		0.00271228	-0.636456	1
Chil5	0.0081169	2.105073142007649	0.00120609		0.00267842	0.2177986909380678	1		0.00120793	-1.13607	0.26961081650212626		0.00178229	-0.444529	1		0.00122043	-0.766467	0.9472153333496969		0.00674822	1.7358023469000008	1		0	-0.436515	1		0.00200609	0.00569711	1		0	2.059524252941441	1		0	0.11662900024437306	1
Gm28609	0.010146125129585723	1.9948375797995253	0.00121504		0.00257922	-0.388267	0.9873670243337859		0.00285511	-0.188534	0.9819222063508946		0.00237638	-0.448931	1		0.00152553	-0.901396	0.8740902895068547		0.00674822	1.3164259118968191	1		0.0092789	1.8168258265503274	1		0.00100305	-1.16737	0.9685287690051847		0	1.6648929643244346	1		0	-0.278002	1
Gm16235	0.0081169	2.196703617473217	0.00121917		0.00168641	-0.552898	0.9457605653410784		0.00208642	-0.158093	1		0.000891143	-1.37461	0.5450548679780546		0.000915319	-1.03656	0.8444939069130702		0.00562352	1.5665212620231141	1		0.00371156	1.2491413172610075	1		0.00351067	0.8077577361595658	1		0	2.1258667477701367	1		0.00271228	1.20005	1
Cdh23	3.538630241028514	1.2980879467145123	0.00122161		1.7236136219971638	0.13716817832422978	1		1.098776430940114	-0.699334	0.0901748		1.5275668548101804	-0.0938167	1		1.260394920665937	-0.385206	0.9212147936692517		2.923105605333557	0.8885447305283285	1		3.271740403682479	1.0430314169508628	1		0.5983177888920433	-1.48061	0.10568658659203824		2.075284442173043	0.3587603700892026	1		0.127477	-3.64681	1
Gm16262	0.029423762875798596	1.5000728880499477	0.00122793		0.014483314463976167	0.3893867416030252	0.9005788291068646		0.010651740335917556	-0.221796	0.9103132717123941		0.00727766	-0.826783	0.5041577896945192		0.00244085	-2.24717	0.0316203		0.032616414988331344	1.5450415346126638	0.9797692992332144		0.012990461046952553	0.29775126148562947	1		0.00501524	-1.17873	0.6856844783530818		0.010428565036045442	0.7737064514633598	1		0	-2.17251	1
Gm13381	0.011160737642544296	1.8706078883706256	0.00124763		0.00396803	0.12227924169829585	1		0.0018668	-1.17259	0.12729948290136214		0.003119	-0.276732	1		0.00183064	-0.905072	0.8328449206124159		0.00899763	1.4621846022083789	1		0.0092789	1.5797866292494787	1		0.00300914	-0.132908	1		0	1.437225600947312	1		0	-0.50567	1
Gm10392	0.0953736	1.3370723087714005	0.00124763		0.045830762207924584	0.15207410177105363	0.9920210500159878		0.0314062	-0.557277	0.3683080454778646		0.037130939591885764	-0.234192	1		0.035087246641632236	-0.292698	1		0.10234806082545353	1.3311937853591633	0.9797692992332144		0.0371156	-0.133566	1		0.0125381	-1.76673	0.11760924738496427		0.010428565036045442	-1.04783	1		0.00542455	-2.40482	1
Satl1	0.0084551	2.1396303640440166	0.00125892		0.00257922	0.0971598	1		0.00208642	-0.283624	0.9306287516486914		0.00118819	-1.0833	0.8327853745383358		0.000915319	-1.13844	0.803308		0.00562352	1.4621846022083798	1		0.00185578	0.5473651515571003	1		0.00150457	-0.366272	1		0	2.027463043709143	1		0	0.0845678	1
Gm43727	0.042275521373273846	1.4384968757328398	0.0012759		0.0159713	-0.214373	0.9873670243337859		0.0136167	-0.494982	0.5666562697790818		0.0130701	-0.523983	0.9809016767648933		0.011288940223829503	-0.679004	0.798487		0.013496447581378487	-0.302135	1		0.0519618	1.6280725638649303	1		0.0336021	1.0056971137714745	0.243237		0.020857130072090883	0.7915452573010482	1		0	-2.74079	1
Gm11634	0.010146125129585723	1.8831922239706165	0.00128154		0.00287682	-0.298325	0.9904609238397127		0.00318454	-0.0985917	1		0.00207933	-0.752652	0.9831738923147465		0.000915319	-1.59787	0.5546803758542448		0.00449882	0.7185243554681646	1		0.00185578	0.0967037	1		0.00651981	1.1060990107293112	0.5028127032113342		0	1.5810613735209644	1		0	-0.361834	1
Mansc4	0.0077787	2.185904216620693	0.00128327		0.00257922	0.3121726593732035	0.9940876370736492		0.00164718	-0.501716	0.8168529025216206		0.00118819	-0.917711	0.9936495120048627		0.00122043	-0.642478	0.9884957556660289		0.00224941	0.5665212620231141	1		0.00185578	0.6993682450021499	1		0.00100305	-0.643806	1		0	2.1777056792897556	1		0	0.23481042659268603	1
1700016P03Rik	0.0260417	1.5449853099255213	0.00128327		0.00882887	-0.308414	0.9642408007785861		0.00944381	-0.172592	0.9466526280646368		0.00831733	-0.367221	1		0.00579702	-0.836856	0.7446293967547863		0.021369375337182604	1.1456346870475835	1		0.00371156	-0.922714	1		0.013541140234773822	0.45343165086976533	1		0	-0.0193312	1		0	-1.96223	1
Serpine3	0.030100171217770977	1.5160062429537566	0.00128327		0.010316881535983024	-0.317719	0.9567293115069778		0.00988306	-0.383159	0.7636256610071896		0.010990758119198186	-0.169	1		0.010068514253685773	-0.263966	1		0.029242303092986723	1.3614068321185027	0.9956298772332848		0.00185578	-1.74214	1		0.010531997960379638	-0.161654	1		0	-0.249377	1		0.00542455	-0.600752	1
Hectd2os	0.025027108652978115	1.577977135536333	0.00128327		0.00882887	-0.198789	1		0.00801626	-0.365725	0.7891124836263067		0.00727766	-0.491714	1		0.00244085	-1.94787	0.14644078325632873		0.0202447	1.154809588451048	1		0.012990461046952553	0.596275	1		0.017553329933966064	0.941157	0.454183		0	0.0635825	1		0.00271228	-0.875243	1
Gm47391	0.00676408	2.518350183422055	0.00128911		0.00158721	-0.0397502	1		0.00120793	-0.49452	0.864487		0.00103967	-0.63307	1		0.000610213	-0.976684	0.9472153333496969		0.00224941	1.0058063075486352	1		0	0.10848091032388929	1		0.00100305	-0.204521	1		0	2.6045203463449527	1		0	0.6616250936478849	1
A330032B11Rik	0.0669644	1.3838074544867371	0.00129001		0.027081814031955437	-0.140954	1		0.030088421155066086	0.0658904	1		0.0267343	-0.144865	1		0.0161706	-0.887012	0.6451100217826833		0.0348658	0.3091334193304629	1		0.018557801495646505	-0.525104	1		0.015045711371970912	-0.948411	0.8063171233446363		0.010428565036045442	-0.500916	1		0	-3.44518	1
Cfap43	0.0700083	1.3590657428739483	0.00129528		0.031645050095947924	0.051757123982984155	1		0.030198232911106473	-0.0396292	1		0.023021182546969172	-0.498167	0.9762971315762475		0.014034898656652894	-1.18511	0.39847365117243866		0.0472376	0.6636624204336465	1		0.033404	0.18911367836983484	1		0.0235716	-0.381222	1		0.020857130072090883	0.00127911	1		0.00542455	-1.94162	1
Asic3	0.0077787	2.185904216620693	0.00129938		0.00238082	0.1505152739144915	1		0.00142755	-0.736796	0.6922900779469302		0.00193081	-0.179352	1		0.000915319	-0.982785	0.8786418054808065		0.00337411	0.9997061080122176	1		0.00185578	0.6993682450021499	1		0.000501524	-1.24669	1		0	2.1777056792897556	1		0	0.23481042659268603	1
Pdgfrl	0.051407	1.414543120831727	0.00130865		0.022717	0.0680231	1		0.018228751502704272	-0.346543	0.7636256610071896		0.0188625	-0.259725	1		0.0094583	-1.25454	0.3922398372156723		0.0461129	1.1392982242961534	1		0.027836702243469756	0.433739	1		0.013541140234773822	-0.682568	1		0.010428565036045442	-0.0959194	1		0.010849108755393702	-0.711418	1
Gm47806	0.036187846295522415	1.4603951378894884	0.00132128		0.0165665	0.19090346387500823	0.9873670243337859		0.013506845992967623	-0.205944	0.9155076664546109		0.0111393	-0.509838	0.9936495120048627		0.00976341	-0.640234	0.8350333301458103		0.023618783267412354	0.726745	1		0.014846241196517205	0.13768088677246393	1		0.00601828	-1.2671	0.581736		0	-0.557499	1		0	-2.50039	1
Slc2a2	0.00744049	2.6148292985396306	0.0013286		0.00188481	0.19471507782502862	1		0.000658871	-1.48625	0.32801772777102345		0.000891143	-0.928809	1		0.000610213	-1.04824	0.9745699611885231		0.00224941	0.934253	1		0.00556734	2.10848	1		0.00150457	0.16242261745892783	1		0	2.5352576839078393	1		0	0.5923624312107698	1
Glp2r	0.010146125129585723	2.1523788567860054	0.00133084		0.00188481	-0.789165	0.8402679405805079		0.00230605	-0.419139	0.864783		0.00148524	-1.03346	0.902982		0.00183064	-0.544074	1		0.00787293	1.645275373437526	1		0.00185578	0.2977512614856277	1		0.00601828	1.2086371724417502	0.588254		0.010428565036045442	2.793790697506693	1		0	-0.162525	1
Gm48677	0.0169102	1.7896878929870583	0.00133252		0.00525764	-0.220322	1		0.00340416	-0.959189	0.2265760100230491		0.00430719	-0.510451	1		0.00518681	-0.138435	1		0.012371743616263612	1.2160240149389816	1		0.018557801495646505	1.8191697670186278	1		0.00651981	0.2423033943276236	1		0	0.7870648343183788	1		0	-1.15583	1
B130046B21Rik	0.033482212927632884	1.458555970769856	0.00133628		0.013392105839977964	-0.0831725	1		0.010432116823836782	-0.533659	0.5192671820478726		0.0130701	-0.109808	1		0.010068514253685773	-0.477237	0.9642201095577241		0.026992895162756974	1.034453709734085	1		0.00742312	-0.610397	1		0.0125381	-0.116293	1		0.010428565036045442	0.5551181062686821	1		0.00271228	-1.38778	1
Gm29477	0.00574947	2.4835847652613774	0.00134607		0.00119041	-0.292472	1		0.000988306	-0.57313	0.8306601908867801		0.000891143	-0.625416	1		0.000915319	-0.32286	1		0.00224941	1.2160240149389807	1		0.00371156	1.951755406636436	1		0.000501524	-0.60728	1		0	2.8073372293446406	1		0	0.864442	1
Gm47320	0.0926679	1.3283065397834672	0.00135069		0.04841	0.31676345231655834	0.9425857284702737		0.023938962816804403	-0.983894	0.013206482646997463		0.0429234	0.0609353	1		0.029900436268521385	-0.501888	0.8984263430635401		0.0809787	1.0145417955935745	1		0.046394503739116265	0.21413715693279833	1		0.016550282509168002	-1.33705	0.38248165137192663		0.010428565036045442	-1.01356	1		0	-3.95742	1
S100a8	0.0578329	1.4504179013261798	0.00135694		0.018649747391969312	-0.497284	0.7787126265168178		0.019326869063108144	-0.41717	0.7144693325644389		0.0184169	-0.465067	1		0.0222728	-0.117009	1		0.0337411	0.5348756354066504	1		0.0909332	1.9930764662420555	1		0.014544187659571882	-0.724463	1		0.1772856056127725	2.960348847850606	1		0.0461087	1.0174535951535368	1
Igf2bp3	0.29153199539009644	1.2815148689158655	0.0013625		0.11150168121581652	-0.356465	0.8966401623702779		0.10772533267561982	-0.407439	0.5916501233418239		0.1269878134042493	-0.0945431	1		0.13821324111877742	0.050829482261754766	1		0.28679951110429286	1.1429851086336345	0.9797692992332144		0.11134680897387902	-0.250725	1		0.11535	-0.22345	1		0.0834285	-0.531131	1		0.010849108755393702	-3.32322	1
Dpp6	0.034835029611577646	1.7917070606237102	0.00136981		0.00882887	-0.594718	0.8697150606783097		0.0143853	0.3419809224567514	0.8022533723546856		0.00460424	-1.55061	0.0742677		0.00396638	-1.60636	0.5156942455236101		0.017995263441837984	0.6664358443197109	1		0.022269361794775806	1.0015657064073773	1		0.0215655	0.9232349535795015	0.5588129029750076		0	-0.242819	1		0	-2.18571	1
Fhitos	0.018939433575226684	2.0035918241417647	0.00137099		0.00476164	-0.404354	0.983066		0.00384341	-0.757555	0.6054555015551377		0.0056439	-0.0603858	1		0.00274596	-1.04358	0.8430494123119329		0.024743487232527225	2.234591774978253	0.9797692992332144		0	-1.70897	1		0.00300914	-0.806844	1		0	0.7870648343183788	1		0	-1.15583	1
1700096J18Rik	0.0213069	1.6380947143170035	0.00137172		0.00783686	-0.0548988	1		0.00658871	-0.369075	0.8168529025216206		0.00608947	-0.463145	1		0.00518681	-0.617603	0.9166910533646594		0.011247	0.6182602319947357	1		0.00742312	0.18622066027345952	1		0.00802438	0.0668806	1		0.010428565036045442	1.3454331250278218	1		0.00271228	-0.597462	1
Gm20468	0.022321475285088592	1.6367846194891893	0.00137904		0.00843207	-0.00351103	1		0.00603965	-0.605552	0.554142		0.00816881	-0.0481075	1		0.0045766	-0.868828	0.7773676781404293		0.012371743616263612	0.6789959912815275	1		0.00371156	-0.628485	1		0.00752286	-0.0966646	1		0.020857130072090883	1.8675547521787461	1		0	-1.66973	1
C530008M17Rik	0.045995767254121946	1.460083330881873	0.00142202		0.022617778751962782	0.3427569613688899	0.9457605653410784		0.013726469505048397	-0.608094	0.4101875776145109		0.0164861	-0.255703	1		0.013424685671581029	-0.529225	0.9270168898917456		0.024743487232527225	0.43687985604615065	1		0.016702021346081855	-0.0567062	1		0.00752286	-1.31198	0.5523535074321242		0.020857130072090883	0.6876782842407367	1		0	-2.84435	1
Gm17168	0.00642588	2.3136597638190652	0.00142305		0.00178561	0.0890056	1		0.00109812	-0.731083	0.7352458060195268		0.000891143	-0.928809	0.9936495120048627		0.00122043	-0.263966	1		0.00562352	2.005806307548635	1		0.00185578	1.0619383243868583	1		0	-1.90684	0.7847555664731635		0	2.5352576839078393	1		0	0.5923624312107698	1
Gm10851	0.17620437308380538	1.2929275256409922	0.00143214		0.0664645	-0.370604	0.9090570267072099		0.0707188	-0.244578	0.8418371274901575		0.065499	-0.356481	1		0.0604111	-0.444325	0.9394321508673789		0.13046565995332537	0.7288367299043026	1		0.076087	-0.0517763	1		0.13440835492294015	0.8004876625703865	0.37816685883481044		0.020857130072090883	-1.38261	1		0.00542455	-3.32551	1
Clcn2	0.0317912	1.510408553337089	0.00144234		0.013888109759977146	0.1510446061680506	1		0.00878494	-0.691966	0.3124723044618437		0.0087629	-0.643717	0.8619987691657828		0.00976341	-0.399481	1		0.017995263441837984	0.5739660741842796	1		0.057529184636504166	2.27103	1		0.00551676	-1.15477	0.7346616653695001		0.020857130072090883	1.2591332786336018	1		0.00271228	-1.27182	1
Mmrn2	0.028747354533826215	1.5132447387816184	0.00148325		0.011705692511980737	0.011530329131697492	1		0.00922419	-0.427115	0.734477		0.00846585	-0.531954	0.9936495120048627		0.00884809	-0.390499	1		0.0202447	0.8932028868811122	1		0.0092789	-0.0797228	1		0.0120366	0.10039152425288922	1		0.010428565036045442	0.8175812608414432	1		0	-2.12874	1
Gm33981	0.00574947	3.0685472659825352	0.00148328		0.00119041	0.20709880228085886	1		0.000439247	-1.32315	0.664341		0.000148524	-2.20011	0.6817311123899207		0.000915319	0.0730686	1		0.0011247	0.9815587613019581	1		0.00185578	1.7172901529994125	1		0	-1.26439	1		0.010428565036045442	4.213329589020476	1		0	1.234810426592686	1
Rad51	0.0615532	1.3901058654034415	0.00148934		0.0159713	-0.942968	0.043060597157353914		0.017020822186260012	-0.808436	0.10503389168088398		0.0164861	-0.805537	0.4125165233327545		0.010373620746221704	-1.40926	0.25484108669749295		0.024743487232527225	-0.0510021	1		0.018557801495646505	-0.397683	1		0.13440835492294015	2.7237531499675685	2.2769340167403536e-11		0.0312857	0.6283670882993206	1		0.0433964	0.792605	1
4731419I09Rik	0.0341586	1.4625231497335482	0.0014999		0.0134913	-0.103382	1		0.0105419	-0.54652	0.5192005422092002		0.011584853152668358	-0.345891	1		0.012509366193973233	-0.17543	1		0.0281176	1.0672886353278432	1		0.018557801495646505	0.51851	1		0.011535	-0.264392	1		0.020857130072090883	1.117405169021941	1		0.00542455	-0.82549	1
Mmp19	0.0503924	1.4017906740977306	0.00150313		0.0224194	0.0670673	1		0.020534798379552403	-0.102625	1		0.013961233286549047	-0.738779	0.559182		0.00915319	-1.28323	0.37953862417187356		0.0348658	0.7469808015173927	1		0.027836702243469756	0.4523784599249492	1		0.0200609	-0.0884469	1		0.0312857	0.9260789457658598	1		0.021698217510787404	0.16237459046595504	1
Tldc2	0.010484329300571913	2.1085453339144538	0.00151596		0.00198402	-0.797631	0.7909768410686911		0.00340416	0.1893339124462745	0.9668403602745597		0.00148524	-1.11919	0.7844219619266397		0.000915319	-1.47342	0.6909872379615134		0.00787293	1.5620198697881733	1		0.011134680897387903	2.0916856677809106	1		0.00200609	-0.366272	1		0.010428565036045442	2.7150787214926515	1		0	-0.240528	1
Gm16853	0.0263799	1.5441915299655307	0.00153405		0.00892807	-0.312441	0.9685846991533942		0.00834569	-0.421506	0.7589989514899563		0.00683209	-0.711611	0.7929127165741024		0.00762766	-0.454298	0.9981339338379597		0.026992895162756974	1.4675627819349462	0.9797692992332144		0.014846241196517205	0.6661114290738501	1		0.016550282509168002	0.7376793004234248	0.7177152859656609		0	-0.0383895	1		0	-1.98128	1
Gm10865	0.012175350155502867	1.8986222645402213	0.00155388		0.00367043	-0.168792	1		0.00285511	-0.599602	0.7057928843689074		0.0025249	-0.730625	0.9936495120048627		0.00183064	-1.0112	0.798487		0.00899763	1.3544707849081261	1		0.00556734	0.8692932464444638	1		0.00651981	0.8344256866216453	0.8634382198177066		0	1.335585339071475	1		0	-0.60731	1
Olfr101	0.00574947	2.6993134563168146	0.00156172		0.00109121	-0.259851	1		0.00142755	0.2424452489058364	0.9823811839208785		0.000297048	-1.81678	0.6016893835166642		0	-2.26397	0.6765312528335888		0.00449882	2.165983332439386	1		0	0.4542557471656181	1		0	-1.4918	1		0	2.9502951831866833	1		0	1.0073999304896137	1
Gm36607	0.0077787	2.2105662708549625	0.00157607		0.00297602	0.6464110476827187	0.9152389782823326		0.00109812	-1.12594	0.38596573238966086		0.000891143	-1.29965	0.6723091692426555		0	-3.01885	0.3050378109282692		0.00787293	2.0940334905603706	0.9804846534251275		0.00185578	0.7172901529994125	1		0.00150457	-0.192242	1		0	2.195407681023215	1		0	0.2525124283261455	1
Gm47950	0.00270563	3.4835847652613783	0.00157784		0.000198402	-0.957288	0.9567293115069778		0.000329435	-0.242982	1		0	-1.96565	0.8176913357619623		0	-0.766467	1		0.00224941	2.981558761301958	1		0	1.951755406636435	1		0.000501524	1.0931599550218145	1		0	4.44779	1		0	2.5048995899604307	1
Gm47448	0.0317912	1.472239791667369	0.0015953		0.012400097999979596	-0.117512	1		0.011200799116119492	-0.299873	0.8287304401045674		0.010842234360830642	-0.326941	1		0.00793277	-0.7411	0.783981		0.0258682	1.0619008696195618	1		0.024125141944340456	0.9885921748168078	1		0.00952895	-0.424116	1		0	-0.362588	1		0.00271228	-1.30246	1
Rgsl1	0.00879331	2.0685472659825335	0.00160155		0.00188481	-0.617213	0.9457605653410784		0.00318454	0.3627394826235477	0.864487		0.00237638	-0.148272	1		0.000305106	-2.27892	0.44135100392413595		0	-1.31122	1		0.00371156	1.039218247886775	1		0.00200609	-0.139501	1		0	1.92055	1		0	-0.0223474	1
Gm45894	0.0957118	1.3125313358844228	0.00160155		0.0373987	-0.283789	0.9497624065162054		0.0455719	0.10116338591846663	0.9578041749968967		0.0319326	-0.518829	0.9175301630696808		0.0234932	-0.929849	0.5854177567705355		0.0697316	0.7300199943059944	1		0.0890774	1.0897786020162528	1		0.0386173	-0.157685	1		0.052142825180227205	0.5156669555499578	1		0.00542455	-2.43001	1
Man2c1os	0.6226338787855772	1.2859064852958046	0.00160155		0.28649186419152856	0.00710025	1		0.21193668915794725	-0.549954	0.29417567049035637		0.26556	-0.127001	1		0.23066050835716495	-0.333872	1		0.5218626398133015	0.9020384216584326	1		0.345175	0.28333100650731513	1		0.21013843549519376	-0.461721	1		0.1251427804325453	-1.09171	1		0.016273663133090553	-3.92854	1
Gm15722	0.00642588	2.5575853467051557	0.00162294		0.00168641	0.2126369858222894	1		0.000878494	-0.880411	0.7394578187483473		0.000594095	-1.28417	0.9506633870381089		0.000305106	-1.48636	0.8042571951581436		0.0011247	0.4961319341317161	1		0.00556734	2.284330745723307	1		0.00150457	0.3382724528583463	1		0	2.702367669743098	1		0	0.7594724170460285	1
Grin2d	0.033144	1.4334612858355422	0.00162889		0.014185712111976657	0.0228124	1		0.010322305067796394	-0.559258	0.4772352467520123		0.0130701	-0.116695	1		0.0109838	-0.352194	1		0.0224941	0.7650669414051956	1		0.0092789	-0.350234	1		0.010531997960379638	-0.375186	1		0	-0.453427	1		0.00542455	-0.805669	1
Gm26679	0.012513554326489058	1.7091444656765091	0.0016486		0.00585285	0.5166431727123895	0.8483780582760779		0.00230605	-1.16602	0.0734296		0.00401014	-0.200111	1		0.00274596	-0.660857	0.9109389490255078		0.00674822	0.7799249001323085	1		0.00556734	0.6816662432686922	1		0.00200609	-0.93364	1		0	1.1515533914337865	1		0	-0.791342	1
Gm11250	0.0311148	1.503107323526197	0.00165946		0.012102495647980086	-0.0894502	1		0.010212493311756008	-0.396738	0.7636256610071896		0.010545186844095557	-0.30817	1		0.00579702	-1.13844	0.578798		0.029242303092986723	1.3001511436260653	1		0.0092789	-0.202368	1		0.014544187659571882	0.2518577010408727	1		0.010428565036045442	0.6960538958108948	1		0	-2.24999	1
Aste1	0.4143001094580837	1.2892858314820794	0.00166897		0.18877909195168935	-0.00879173	1		0.1457202002655938	-0.488162	0.412882		0.17124789339777713	-0.178192	1		0.14614600992471166	-0.406244	0.9681184687186639		0.4026440195111249	1.1299941372171858	0.9823324946927714		0.14846241196517204	-0.342885	1		0.14393730545852174	-0.413974	1		0.073	-1.2022	1		0.0433964	-2.05573	1
Ccdc38	0.0213069	1.5827179572806296	0.00169696		0.00783686	-0.114332	1		0.009334	0.2290868660508183	0.870586		0.00430719	-1.06405	0.2569437247267302		0.00366128	-1.15847	0.6153901784010883		0.012371743616263612	0.7035740140021929	1		0	-2.19919	1		0.011033521672778669	0.4874388941338612	1		0	0.2968529445827599	1		0	-1.64604	1
Olfr113	0.00710229	2.215095929335476	0.00170473		0.000992008	-1.17593	0.4652718816280761		0.00153736	-0.435627	0.8573319468856466		0.000297048	-2.46314	0.0654039		0	-2.88846	0.36335357598862156		0.00562352	1.7799249001323076	1		0.00185578	0.8493936890067584	1		0.00952895	2.6337283363845163	0.000987172		0.010428565036045442	3.3454331250278218	1		0	0.3829090655818206	1
Gm11646	0.00574947	2.4440564010747403	0.00173683		0.00119041	-0.327238	1		0.000878494	-0.789264	0.7394578187483473		0.00103967	-0.432771	1		0.00152553	0.29124880606532244	1		0.0011247	0.575566	1		0.00185578	1.3112977933235754	1		0.00100305	-0.0223173	1		0	2.780370181744371	1		0	0.8374749290473016	1
Gm17034	0.018939433575226684	1.6022292617599971	0.00175748		0.00872967	0.3646400792673399	0.9457605653410784		0.00658871	-0.19139	0.9528723659291467		0.00534686	-0.514219	1		0.00274596	-1.3627	0.5101185486954929		0.00899763	0.46218460220837976	1		0.00185578	-1.01063	1		0.00351067	-0.923648	0.9531470642167186		0	0.4799752484066495	1		0	-1.46292	1
Gm17387	0.020630454430157638	1.6112325883573382	0.00175797		0.00734086	-0.148008	1		0.00735739	-0.136066	1		0.00698062	-0.206109	1		0.0048817	-0.679004	0.8877950157161023		0.011247	0.6439774021031104	1		0.00185578	-1.12569	1		0.00501524	-0.566349	1		0.010428565036045442	1.370350757232151	1		0	-1.57756	1
Gm30363	0.00608768	2.483584765261379	0.00176413		0.000992008	-0.69949	0.9457605653410784		0.00131774	-0.194619	1		0.00118819	-0.29322	1		0.00183064	0.4844948817422541	1		0	-0.503868	1		0.00185578	1.257858534362116	1		0	-1.71419	0.8988725723516532		0	2.7279027618502356	1		0	0.7850075091531661	1
BC051019	0.0081169	2.0613517645783297	0.0017779		0.00287682	0.31733436448898367	0.9873670243337859		0.00153736	-0.795523	0.591792		0.00163376	-0.615148	1		0.000915319	-1.13844	0.798487		0.00562352	1.4621846022083798	1		0.00185578	0.5473651515571003	1		0.00150457	-0.366272	1		0	2.027463043709143	1		0	0.0845678	1
Spdya	0.0270563	1.4658827635279188	0.00178006		0.012995302703978615	0.2952920325766044	0.9465191340267941		0.00867513	-0.475642	0.6661398607639765		0.009357	-0.308635	1		0.00732256	-0.62011	0.8626469202947393		0.00787293	-0.343972	1		0.00742312	-0.297065	1		0.00902743	-0.266243	1		0	-0.137168	1		0.00271228	-1.07652	1
4930546C10Rik	0.00439665	3.0430121738753977	0.00179631		0.000396803	-1.12079	0.8973247141418024		0.000439247	-0.921053	0.7636256610071896		0.000594095	-0.363609	1		0.000305106	-0.6332	1		0.00337411	2.445505861061749	1		0.00185578	2.0850219374998993	1		0.000501524	0.1389636446349396	1		0	3.5352576839078393	1		0	1.5923624312107698	1
Gm47914	0.00169102	5.068547265982534	0.00181409		0	-1.44271	0.9457605653410784		0.000109812	-0.0205892	1		0	-0.685537	1		0	0.5136412274017701	1		0	2.496131934131716	1		0	3.2318633258291705	1		0	1.2858050329642108	1		0	5.727902761850236	1		0	3.785007509153166	1
Gm5901	0.00270563	3.4835847652613783	0.00183765		0.000496004	0.36464	1		0.000219624	-0.757555	0.864487		0	-1.96565	0.8309668331650342		0	-0.766467	1		0	1.2160240149389807	1		0.00185578	3.039218247886776	1		0	0.00569711	1		0	4.44779	1		0	2.5048995899604307	1
Gm20406	0.015557391865364775	1.6035453893022913	0.00185682		0.00575365	-0.0836337	1		0.00461209	-0.476967	0.7248780443871894		0.00371309	-0.777656	0.7874838945265892		0.00427149	-0.451593	1		0.013496447581378487	1.3104396168310881	1		0	-1.73557	1		0.010531997960379638	0.9232349535795015	0.5654316852802302		0	0.7604706243066657	1		0	-1.18242	1
A630089N07Rik	0.2746217868407869	1.2589126041180956	0.00187813		0.13729388505577408	0.14388547692610976	1		0.0815901	-0.814213	0.0473589		0.11748229286872655	-0.14856	1		0.0900064	-0.545364	0.8444939069130702		0.1732044106276906	0.4574303602038059	1		0.18557801495646506	0.5578783782397774	1		0.15246320856930526	0.2730228529278551	1		0.23985699582904516	0.956256	1		0.013561385944242128	-2.99229	1
Syn3	0.010484329300571913	1.8111594232898822	0.00189219		0.00436483	0.38076	0.9567293115069778		0.00296492	-0.356192	0.864487		0.003119	-0.226106	1		0.000915319	-1.70137	0.49838419621627883		0.0011247	-0.740907	1		0.00371156	0.5907577470704828	1		0.00150457	-0.929208	1		0	1.4799752484066486	1		0	-0.46292	1
Gm36208	0.00473486	2.4835847652613783	0.00189631		0.000595205	-1.07593	0.7247504834803181		0.000878494	-0.435627	0.8689687222435738		0.000445571	-1.23573	0.8672252762124428		0.000610213	-0.486359	1		0.00562352	2.603047138048229	0.9797692992332144		0.00185578	1.612953493184678	1		0.00200609	1.0931599550218127	0.9144768498675699		0	3.075826065270541	1		0	1.1329308125734734	1
Gm44995	0.0388935	1.4019865460742578	0.00191757		0.018550546607969474	0.20842249724562478	0.9873670243337859		0.013726469505048397	-0.36824	0.7636256610071896		0.013812709528181505	-0.326409	1		0.00915319	-0.894733	0.663947		0.0427388	1.4391419555468872	0.9797692992332144		0.00556734	-1.1968	1		0.00651981	-1.31137	0.4984383301421483		0	-0.707916	1		0.00271228	-1.64843	1
Eml5	0.22287654867989973	1.2611923439249306	0.00192424		0.11695772433580755	0.247283	0.9492171295828811		0.0813705	-0.450136	0.5477925646432232		0.0827277	-0.389779	1		0.0579702	-0.894772	0.5888831893992389		0.17095500269746083	0.7523126689244486	1		0.10577946852518508	0.050925331664441575	1		0.0982986	-0.075544	1		0.052142825180227205	-0.746286	1		0.00542455	-3.69034	1
Tbx6	0.0926679	1.3014703548111521	0.00195689		0.0382915	-0.188917	0.9915834665502085		0.0386537	-0.164395	0.9323719226999352		0.0401014	-0.0860523	1		0.031120862238665115	-0.464179	0.9327186086541744		0.0517364	0.33059870180656237	1		0.0890774	1.128407282906915	1		0.015547235084369943	-1.4489	0.30395862898267806		0.1251427804325453	1.6753645678364908	1		0	-3.97939	1
4930507D05Rik	0.00710229	2.2705910419271795	0.00195689		0.00178561	-0.14232	1		0.00109812	-0.930391	0.6011343943079633		0.000891143	-1.11522	0.9009386449880395		0.00122043	-0.444539	1		0.00449882	1.5379521098263433	1		0.00556734	1.9306937911086068	1		0.00250762	0.6120332652851985	1		0	2.365332682465527	1		0	0.42243742976845766	1
Fbxw27	0.012513554326489058	1.7202850232817104	0.00196603		0.00525764	0.29934861901562027	0.983066		0.0018668	-1.48487	0.0170833		0.00653505	0.6829332817164291	0.7783592732694233		0.00305106	-0.504974	0.9843737908371709		0.00337411	-0.0452413	1		0	-1.33582	1		0.000501524	-2.27316	0.28752466075998007		0	1.160218252560914	1		0	-0.782677	1
Slc26a1	0.00642588	2.220550359427585	0.00196898		0.00218242	0.39634893899467905	0.9873670243337859		0.000878494	-1.14834	0.38474943894758734		0.00148524	-0.251641	1		0.000610213	-1.11641	0.8190640605193759		0.0011247	0.2590927368308673	1		0.00371156	1.6018129355794768	1		0.00100305	-0.344245	1		0	2.4691684934500673	1		0	0.5262732407529978	1
Gm49527	0.0169102	1.609115647345237	0.0020142		0.00654725	0.012876754839214577	1		0.00680833	0.0904422	1		0.003119	-1.17364	0.20693340932577062		0.00549192	-0.205863	1		0.00787293	0.4579968052449459	1		0.00742312	0.4969601981198588	1		0.00401219	-0.576119	1		0	0.6465144350095802	1		0	-1.29638	1
Xlr5a	0.038217071321439554	1.4804244243680502	0.0020142		0.015772924655974047	0.00357359	1		0.010212493311756008	-0.778883	0.20780092972696626		0.013515662011446418	-0.258502	1		0.011899153208901368	-0.409644	1		0.0258682	0.7930523341179203	1		0.027836702243469756	0.922874	1		0.00952895	-0.69082	1		0.10428565036045441	2.8654062856001694	1		0.0189859	0.4553713191305411	1
C9	0.00236743	5.483584765261378	0.00204757		0	-1.80528	0.9663091059542398		0	-1.60555	0.8229090353390969		0	-1.04811	1		0	0.15107114801706345	1		0.0011247	3.3034868561893216	1		0	2.869293246444462	1		0	0.9232349535795024	1		0	5.365332682465527	1		0	3.4224374297684577	1
Oc90	0.00473486	2.635587858706428	0.00205231		0.00119041	0.20709880228085886	1		0.000549059	-1.02059	0.6976766934636098		0.000742619	-0.463145	1		0	-2.03656	0.6725535317487827		0.00337411	2.0555593427457346	1		0.00185578	1.7172901529994125	1		0	-1.26439	1		0	3.1777056792897556	1		0	1.234810426592686	1
4930588G17Rik	0.00710229	2.135661461841071	0.00205465		0.00198402	-0.0759325	1		0.000988306	-1.20116	0.2728338460495896		0.00207933	0.051428195058241144	1		0.000610213	-1.32286	0.7545440856693847		0.00674822	1.961094658742243	1		0.00185578	0.791291	1		0.00150457	-0.116293	1		0	2.2684711432129374	1		0	0.32557589051586966	1
Ugt1a5	0.010146125129585723	2.0283901395105515	0.00205914		0.00327363	0.0945509	1		0.00296492	-0.0877034	1		0.00133671	-1.28417	0.5696094784461382		0.000915319	-1.48636	0.6807489954509585		0	-1.542	1		0.012990461046952553	2.284330745723307	1		0.00100305	-1.14206	1		0.0312857	3.7279027618502356	1		0	-0.253128	1
Mmp24	0.00879331	1.9165441725374839	0.00205914		0.00297602	0.0709089	1		0.00208642	-0.556642	0.7636256610071896		0.00222786	-0.385977	1		0.00183064	-0.515505	1		0.0011247	-0.410759	1		0.00742312	1.6887210008026425	1		0.00200609	-0.257337	1		0	1.8073372293446406	1		0	-0.135558	1
1700025N23Rik	0.022997883627060973	1.4888214136275257	0.00213443		0.012598499567979269	0.6097525771038708	0.4652718816280761		0.00801626	-0.302989	0.8306601908867801		0.00490128	-1.06684	0.19768169600775626		0.00335617	-1.46908	0.36991959464410745		0.019119967406952855	1.1246837034005566	1		0.00742312	-0.0439951	1		0.00401219	-1.12493	0.7812651447582577		0	0.11319291773502638	1		0.00271228	-0.82549	1
Gm43118	0.012513554326489058	1.7202850232817104	0.00213909		0.00605125	0.6045908719880924	0.7247504834803181		0.00307473	-0.68617	0.5319843460207472		0.0025249	-0.927426	0.6794587859892313		0.00122043	-1.69693	0.43965009292165486		0.00787293	0.9906039009049659	1		0.00742312	1.0212963398895143	1		0.00351067	-0.219723	1		0	1.160218252560914	1		0	-0.782677	1
Chadl	0.0341586	1.4011226050694052	0.00213944		0.014284912895976495	-0.0590772	1		0.012848	-0.253423	0.864487		0.012475995702873617	-0.279363	1		0.010068514253685773	-0.557325	0.8881016889011402		0.023618783267412354	0.762918	1		0.0092789	-0.420213	1		0.013039616522374791	-0.137794	1		0	-0.522734	1		0.00271228	-1.46292	1
1700028K03Rik	0.059523934093569576	1.3438600015947655	0.00214425		0.027181014815955272	0.0543	1		0.0238292	-0.196873	0.9155076664546109		0.021832992480028828	-0.328725	1		0.018001283059620017	-0.581077	0.8524244003544201		0.023618783267412354	-0.105904	1		0.0352598	0.4892411051149521	1		0.019559424783562186	-0.42569	1		0.020857130072090883	0.22237472862348362	1		0.00271228	-2.30699	1
Nrip3	0.010146125129585723	2.097931072763628	0.00214644		0.00307522	0.042712	1		0.00208642	-0.637261	0.7636256610071896		0.00163376	-0.937076	0.9762385786301967		0.00122043	-1.09854	0.8444939069130702		0.00674822	1.3965962605808029	1		0.00556734	1.2843307457233069	1		0.00250762	-0.049798	1		0.010428565036045442	2.7538979703831794	1		0	-0.202053	1
Gm15650	0.00473486	2.390475360869898	0.00214881		0.00128961	0.12760088196649022	1		0.000988306	-0.323152	0.9306287516486914		0.000445571	-1.30445	0.8666494821761791		0	-2.20257	0.6142617075112955		0.00337411	1.8772221014872237	1		0.00185578	1.5473651515571003	1		0.00100305	0.2186908371056724	1		0	3.0116957278508254	1		0	1.0688004751537576	1
Ttc39a	0.0378789	1.3938706439065243	0.00219462		0.014582515247976003	-0.226806	0.9873670243337859		0.014604963553371495	-0.215028	0.9082767609583468		0.014406804561651677	-0.217669	1		0.011899153208901368	-0.470818	0.9695805445084139		0.0359905	1.2160240149389816	1		0.00742312	-0.840977	1		0.0120366	-0.415269	1		0.010428565036045442	0.3258043182788892	1		0.00813683	-0.612209	1
Gm45278	0.00507306	2.39612	0.00221338		0.00148801	0.2771772380169999	1		0.000549059	-1.3101	0.3686856344441293		0.00118819	-0.0658095	1		0.000915319	-0.202566	1		0	-0.311223	1		0	0.42450840377156673	1		0.00100305	0.12353360406533298	1		0	2.92055	1		0	0.9776525870955624	1
Rad54l	0.0415991	1.404358074110803	0.00222584		0.0137889	-0.494762	0.7787126265168178		0.013506845992967623	-0.514853	0.554142		0.012030424427770987	-0.665289	0.7683687671705953		0.00610213	-1.57901	0.20738456182669357		0.021369375337182604	0.3307942021850563	1		0.014846241196517205	-0.110529	1		0.0646966	2.098719480363714	1.1730067450293678e-05		0.020857130072090883	0.7870648343183788	1		0.00542455	-1.15583	1
Gm47003	0.010822533471558104	1.7597945598429057	0.00222584		0.00416643	0.16154821388982743	1		0.00285511	-0.526229	0.7368343136865514		0.00282195	-0.486992	1		0.00213575	-0.745093	0.8708476318016897		0.011247	1.7294954732891687	0.9797692992332144		0.00371156	0.5052396758844253	1		0.00100305	-1.44082	0.7066611493191922		0	1.3957063315090457	1		0	-0.547189	1
Gm42701	0.027394537849881453	1.4275088408552898	0.0022264		0.012598499567979269	0.16006893501813568	1		0.009334	-0.405967	0.7416670030391865		0.00950552	-0.33963	1		0.00823788	-0.497358	0.9432363960955354		0.017995263441837984	0.7256137802544851	1		0.011134680897387903	0.14613345180328796	1		0.00752286	-0.575725	1		0	-0.185842	1		0	-2.12874	1
Flacc1	0.0473486	1.3799621341872212	0.00224435		0.021923373263963923	0.12288233306396013	1		0.0160325	-0.464773	0.6271929929361663		0.0170802	-0.321698	1		0.016780857089476287	-0.304191	1		0.0348658	0.821687	1		0.022269361794775806	0.22002171318465535	1		0.011033521672778669	-0.883124	0.8980315875709632		0.020857130072090883	0.5810613735209635	1		0.00271228	-1.94873	1
Gm48559	0.0077787	2.1378099284196486	0.00224819		0.00287682	0.49017096135119864	0.9457605653410784		0.00153736	-0.658019	0.7567251451043469		0.00118819	-0.956185	0.9790518690754486		0.00122043	-0.679004	1		0.00562352	1.5846686087333737	1		0	-0.353099	1		0	-2.29916	0.5884958919353572		0	2.1429402611290795	1		0	0.200045	1
Qtrt2	0.1657200437832335	1.254491861443841	0.00224819		0.0756902	-0.0444842	1		0.0616044	-0.424675	0.6054555015551377		0.0702517	-0.168726	1		0.0491221	-0.700549	0.7379462512863851		0.12259273219752126	0.695215	1		0.092789	0.2906307340790457	1		0.085259	0.15456049968595753	1		0.10428565036045441	0.5527825980028971	1		0.010849108755393702	-2.53072	1
Gm19519	0.0659498	1.3334230186404956	0.00224819		0.023212983455961803	-0.457548	0.8004741897029636		0.0407402	0.6647403023229703	0.12246660960873257		0.018713993554310426	-0.764479	0.4612902698557738		0.013729792164116962	-1.1498	0.4559822228921217		0.0314917	0.1432676725036668	1		0.0352598	0.33047920652719753	1		0.022067043345557338	-0.410754	1		0.020857130072090883	0.0662943	1		0	-3.46428	1
Grm8	0.0128518	1.8147906737367503	0.00226158		0.00386883	-0.255946	1		0.00296492	-0.705087	0.5704732541407297		0.00386162	-0.210758	1		0.00610213	0.5635664527334541	0.8626754241826768		0.0011247	-1.02743	1		0.00371156	0.3022526537205694	1		0.00351067	-0.182964	1		0.010428565036045442	2.2043408057932217	1		0	-0.747488	1
Gm26590	0.16030877704745441	1.2538349511396567	0.00227919		0.0743014	-0.0160894	1		0.058639477725566755	-0.454381	0.54362		0.0727766	-0.0497389	1		0.063157	-0.263388	1		0.1327150678835551	0.8629142648033397	1		0.042682943439986964	-0.763298	1		0.0511554	-0.564635	1		0.020857130072090883	-1.27852	1		0.00542455	-3.22142	1
Gm50339	0.00135282	5.805512860148742	0.00228584		0	-0.957288	1		0	-0.757555	0.9407694285866885		0	-0.200111	1		0	0.9990680545720121	1		0	2.981558761301958	1		0	3.7172901529994125	1		0	1.771231860134451	1		0	6.213329589020476	1		0	4.270434336323408	1
Gm16278	0.0869185	1.2817078010427254	0.00229777		0.0407715	0.038516067585498526	1		0.032065	-0.410795	0.6632676368047571		0.037428	-0.114357	1		0.028680010298377655	-0.507892	0.8982660261345151		0.0652328	0.7494183634139491	1		0.020413581645211155	-0.860642	1		0.031094470168739886	-0.362102	1		0.020857130072090883	-0.373635	1		0.010849108755393702	-1.57756	1
Vmn2r24	0.0077787	1.939264249037568	0.00232744		0.00277762	0.20025326136645738	1		0.00120793	-1.20822	0.18691201611042352		0.00267343	0.14092634589734487	1		0.00152553	-0.553473	1		0.00224941	0.3806547167117813	1		0.00742312	1.885412911807741	1		0.000501524	-1.4304	0.8408565419560611		0	1.9960988727998084	1		0	0.053203620102738824	1
Sptbn2	0.010822533471558104	1.7597945598429057	0.0023386		0.00357123	-0.140152	1		0.00362379	-0.103051	1		0.0025249	-0.662454	0.9936495120048627		0.00183064	-0.948465	0.7904322245212937		0.00449882	0.527383	1		0.00556734	0.9306937911086068	1		0.00451371	0.370694	1		0	1.3957063315090457	1		0	-0.547189	1
Rab33a	0.01319	1.7611187407902866	0.00234926		0.00505924	0.15818920179991292	1		0.00329435	-0.620982	0.6569696599606863		0.003119	-0.64757	0.9936495120048627		0.00244085	-0.857807	0.8444939069130702		0.00787293	0.9459348515712369	1		0.00556734	0.6469008251080162	1		0.00451371	0.075238	1		0	1.117405169021941	1		0.00542455	0.7764454956497424	1
Dcbld2	0.2790184410636074	1.2310682313415835	0.00235132		0.1484043728637558	0.23963130889196327	0.9550879500541269		0.0897162	-0.705113	0.11429510918791524		0.12030424427770987	-0.162627	1		0.077497	-0.822602	0.6320299869173317		0.2418113524996979	0.9079923895349422	1		0.1280488303199609	-0.027486	1		0.12588245181215663	-0.0684718	1		0.0834285	-0.50944	1		0.040684157832726386	-1.62013	1
Tll2	0.044642950570177184	1.3764758720056625	0.00235885		0.019244952095968333	-0.0252091	1		0.013397034236927235	-0.680464	0.2680524087600112		0.021832992480028828	0.20714957674940315	1		0.017086	-0.188189	1		0.0382399	1.042600916934104	1		0.018557801495646505	0.0577807	1		0.00351067	-2.35392	0.046680585622495926		0.010428565036045442	0.0758261	1		0.00271228	-1.86707	1
Lama2	0.0077787	1.9600228092043652	0.00239149		0.00238082	-0.0789666	1		0.00164718	-0.702413	0.6746960794808343		0.00133671	-0.931294	0.91971		0.00244085	0.0986037	1		0.00674822	1.6845770235448283	1		0	-0.484344	1		0.00300914	0.47425012237732034	1		0	2.0116957278508254	1		0	0.0688005	1
Sspo	0.00980792	1.8826807206712015	0.00239997		0.00367043	0.2375281613639988	1		0.0037336	0.26739160603606926	0.8947613037610413		0.00118819	-1.51561	0.2371842360452463		0.00122043	-1.21506	0.7230448195820347		0.0011247	-0.591331	1		0.00556734	1.168853528303372	1		0.00150457	-0.777205	1		0	1.6283670882993198	1		0	-0.314528	1
Gm15777	0.00676408	2.2611923439249297	0.00240006		0.00178561	-0.0598577	1		0.00164718	-0.190514	1		0.00118819	-0.638995	1		0.000915319	-0.723398	1		0	-0.805038	1		0.00371156	1.558091558150159	1		0.00100305	-0.387967	1		0	2.4267332271296693	1		0	0.48383797443260157	1
Cnn1	0.00439665	2.705977186597827	0.00241137		0.000793606	-0.323416	1		0.000768682	-0.342517	0.9527414919819667		0.000297048	-1.4225	0.9059798110539261		0.000305106	-0.848929	0.9924806007437866		0.00562352	2.8884493569104777	0.9797692992332144		0	0.829765	1		0	-1.11629	1		0	3.3258043182788883	1		0	1.3829090655818206	1
Gm32098	0.0896241	1.280301166872635	0.00241865		0.049798793567918054	0.39068743748818857	0.7862169177835062		0.026025386181571762	-0.83198	0.0566495		0.0411411	-0.00360524	1		0.028069797313305788	-0.588994	0.834575		0.0528611	0.39359377241927884	1		0.0835101	1.0659264265557478	1		0.011033521672778669	-1.90291	0.0766056		0.020857130072090883	-0.418939	1		0	-3.94873	1
Gm671	0.00574947	2.331581671816328	0.00243613		0.00198402	0.5475041364171513	0.9457605653410784		0.000768682	-1.07948	0.49397909916899335		0.000445571	-1.63307	0.556467		0.000305106	-1.48636	0.7773676781404293		0.00224941	1.1070896433858177	1		0.00556734	2.284330745723307	1		0.00150457	0.3382724528583463	1		0	2.702367669743098	1		0	0.7594724170460285	1
Gdf11	0.015219187694378584	1.6148292985396315	0.00243922		0.00704326	0.3848179612049698	0.9457605653410784		0.00351398	-0.891078	0.22631488846354703		0.00371309	-0.732332	0.8685577363566275		0.00396638	-0.515505	0.9776907762862291		0.010122335686033865	0.9529896091051882	1		0.00371156	-0.0969184	1		0.00752286	0.46380333494220416	1		0	0.800548	1		0	-1.14235	1
Gm17110	0.00676408	2.1479817334769384	0.002449		0.00138881	-0.611112	0.9457605653410784		0.00197661	0.030941143712125196	1		0.00148524	-0.396031	1		0.000915319	-0.808287	0.9686020582446804		0.00674822	2.0447525877891524	1		0	-0.150606	1		0.000501524	-1.07677	1		0	2.3454331250278218	1		0	0.402538	1
Fam169a	0.019954046088185254	1.5449853099255222	0.00245638		0.00912647	0.2817470709189944	0.9643282840225328		0.0056004	-0.630005	0.4882932890503874		0.00445571	-0.940794	0.4593217276297275		0.00427149	-0.875401	0.7545440856693847		0.014621151546493362	1.0023173214687562	1		0.0092789	0.4744336291032498	1		0.011535	0.6228400202417808	0.9047948431735464		0.010428565036045442	1.3653326824655272	1		0	-1.58256	1
Lilr4b	0.044642950570177184	1.3739602740868797	0.00246297		0.010912086239982044	-1.06011	0.017332809970398065		0.014604963553371495	-0.531929	0.5056154067431209		0.00698062	-1.65735	0.00093338		0.00213575	-3.12815	0.000460616		0.030367007058101594	0.7035740140021938	1		0.014846241196517205	-0.23794	1		0.10080626619220512	2.771231860134452	2.0409896168222285e-11		0.020857130072090883	0.6607885659916981	1		0.10306653317624018	2.4940603575989666	0.0997983
Gm27209	0.011160737642544296	1.7896878929870583	0.00250175		0.00436483	0.22713655551740342	1		0.00230605	-0.906932	0.33548209256101685		0.00356457	-0.129144	1		0.00183064	-0.969681	0.8061364362530384		0.00674822	1.012809695286399	1		0.00742312	1.2422052700506319	1		0.00150457	-1.03612	0.9699007813146756		0.010428565036045442	2.385510564403157	1		0	-0.567509	1
4933406J10Rik	0.024012496140019546	1.488602840028003	0.00251384		0.010019279183983513	0.0314409	1		0.00911438	-0.146597	0.9871971624351663		0.00727766	-0.505789	1		0.00549192	-0.840467	0.7663388462686614		0.013496447581378487	0.5692983466936887	1		0.00556734	-0.432457	1		0.00902743	-0.0683035	1		0	0.051441906643582946	1		0.00542455	-0.298408	1
Papln	0.0077787	2.0024580755247614	0.00253367		0.00287682	0.3407933373129719	0.9873670243337859		0.00131774	-1.02059	0.366542		0.0025249	0.10191796551193555	1		0.000610213	-1.55347	0.645653		0.00224941	0.42901773827317946	1		0.00371156	1.1647491299706347	1		0.00100305	-0.781309	1		0	2.0434045875781637	1		0	0.10050933488109592	1
Tmem86b	0.16335261458633013	1.2463649262472911	0.00253535		0.0853127	0.2189342242834993	0.9608955369360788		0.0602867	-0.446081	0.5630494725937996		0.0625285	-0.35184	1		0.0460711	-0.78312	0.6645919103087828		0.0809787	0.0983129	1		0.2022800363025469	1.445538530064511	1		0.0466417	-0.735955	0.9508297209943192		0.21899986575695427	1.5726245363723241	1		0.013561385944242128	-2.25313	1
Pde1b	0.4210641928778075	1.2559089503674892	0.00254073		0.2194321342076389	0.2270180297992237	0.9589815792248374		0.1293582486155761	-0.759511	0.0606136		0.16471284802960526	-0.305837	1		0.1192966385815496	-0.772085	0.6643157160241636		0.25193368818573175	0.3739062405404936	1		0.6810713148902268	1.8498233822462387	1		0.12437788067495954	-0.685142	0.9825536965300935		1.0532850686405895	2.43867	1		0.013561385944242128	-3.61139	1
Gm49756	0.028747354533826215	1.4220094861404249	0.00256175		0.011507290943981065	-0.122547	1		0.009334	-0.497202	0.6151724167835377		0.012030424427770987	-0.0244562	1		0.00976341	-0.32111	1		0.0202447	0.8167047494070685	1		0.022269361794775806	0.9847704638643995	1		0.00651981	-0.851029	0.9393961880485585		0.010428565036045442	0.7440947953528205	1		0	-2.20205	1
Gm36864	0.00439665	3.290939687318983	0.00257428		0.000396803	-0.957288	0.9653807299949133		0.000329435	-1.13607	0.7636256610071896		0.000297048	-1.04811	1		0	-1.53698	0.9745699611885231		0.00224941	2.1335618547470077	1		0	1.1812372527592032	1		0.00200609	1.771231860134451	0.6884520543115824		0	3.6772766887802666	1		0	1.7343814360831988	1
Lrrc28	0.43087211383640706	1.2520077909491818	0.00258149		0.22002733891163795	0.17998147113613117	0.9873670243337859		0.1661451868891058	-0.360572	0.6844104809936578		0.16114827782878421	-0.386065	0.9936495120048627		0.11777110611886994	-0.830168	0.6274591788475895		0.2845501031740631	0.5171786340283118	1		0.33589620707120177	0.7572754870183274	1		0.16149063539248779	-0.33217	1		0.21899986575695427	0.17271606706401244	1		0.021698217510787404	-3.06227	1
B230319C09Rik	0.00710229	2.215095929335476	0.00258869		0.00228162	0.2771772380169999	1		0.00120793	-0.827944	0.6747689068581437		0.00118819	-0.752652	1		0	-2.88846	0.39427257811662536		0.00562352	1.7799249001323076	1		0.00371156	1.454255747165619	1		0.00100305	-0.491803	1		0.010428565036045442	3.3454331250278218	1		0	0.3829090655818206	1
[truncated: 2,549 more rows]

## Sheet: Cluster 2 DEGs
UPREGULATED
[truncated: 655 more rows]

## Sheet: Cluster 3 DEGs
UPREGULATED
[truncated: 1,270 more rows]

[truncated: 7 more sheets: Cluster 4 DEGs, Cluster 5 DEGs, Cluster 6 DEGs, Cluster 7 DEGs, Cluster 8 DEGs, Cluster 9 DEGs, Cluster 10 DEGs]
