# Supplementary material for: Type I interferon signaling in microglia drives synaptic engulfment and neuronal loss following traumatic brain injury
Source: Research Square preprint supplement (doi:10.21203/rs.3.rs-9785030/v1), 2026-06-06
Supplement: Supplementary file 2 [file 597dc1b181e964b161caa2e8.xlsx]

## Sheet: WT TBI vs control
WT TBI vs control
	external_gene_name2	baseMean	log2FoldChange	lfcSE	stat	pvalue	padj	neg log10 adj p	ensembl	entrez	description	ncbi_gene_id	chrom_name	start	end	karyotype	strand
NM_019467.2	Aif1	1062.96	1.01807	0.109699	9.28064	1.68e-20	1.25e-18	17.9031	NM_019467	11629	allograft inflammatory factor 1 [Source:MGI Symbol;Acc:MGI:1343098]	11629	17	35389967	35395044	q	-1
NM_020008.2	Clec7a	182.03	3.29925	0.293654	11.2351	2.74e-29	2.07e-26	25.684	NM_020008	NA	NA	NA	NA	NA	NA	NA	NA
NM_011331.2	Ccl12	357.877	2.75974	0.248895	11.088	1.43e-28	6.76e-26	25.1701	NM_011331	20293	C-C motif chemokine ligand 12 [Source:MGI Symbol;Acc:MGI:108224]	20293	11	81992671	81994226	q	1
NM_010186.5	Fcgr1	231.452	1.43947	0.130184	11.0572	2.02e-28	6.76e-26	25.1701	NM_010186	14129	Fc receptor, IgG, high affinity I [Source:MGI Symbol;Acc:MGI:95498]	14129	3	96190225	96201285	q	-1
NM_009139.3	Ccl6	235.911	2.71568	0.255322	10.6363	2.02e-26	4.5e-24	23.3468	NM_009139	20305	C-C motif chemokine ligand 6 [Source:MGI Symbol;Acc:MGI:98263]	20305	11	83478708	83483913	q	-1
NM_011338.2	Ccl9	241.453	2.07134	0.199755	10.3694	3.42e-25	5.71e-23	22.2434	NM_011338	20308	C-C motif chemokine ligand 9 [Source:MGI Symbol;Acc:MGI:104533]	20308	11	83463745	83469462	q	-1
NM_023158.6	Cxcl16	149.371	1.85222	0.181243	10.2196	1.62e-24	2.16e-22	21.6655	NM_023158	66102	C-X-C motif chemokine ligand 16 [Source:MGI Symbol;Acc:MGI:1932682]	66102	11	70344809	70350810	q	-1
NM_010724.2	Psmb8	527.101	1.30715	0.134244	9.73711	2.09e-22	2.33e-20	19.6326	NM_010724	16913	proteasome (prosome, macropain) subunit, beta type 8 (large multifunctional peptidase 7) [Source:MGI Symbol;Acc:MGI:1346527]	16913	17	34416695	34420428	q	1
NM_016850.2	Irf7	217.797	2.10837	0.219088	9.62338	6.37e-22	6.08e-20	19.2161	NM_016850	54123	interferon regulatory factor 7 [Source:MGI Symbol;Acc:MGI:1859212]	54123	7	140842619	140846394	q	-1
NM_018734.3	Gbp3	252.213	1.36159	0.144794	9.40368	5.27e-21	4.4e-19	18.3565	NM_018734	55932	guanylate binding protein 3 [Source:MGI Symbol;Acc:MGI:1926263]	55932	3	142265787	142278970	q	1
NM_001001892.2	H2-K1	1542.53	1.10809	0.121247	9.13909	6.3e-20	4.21e-18	17.3757	NM_001001892	14972	histocompatibility 2, K1, K region [Source:MGI Symbol;Acc:MGI:95904]	14972	17	34214991	34219321	q	-1
NM_023258.4	Pycard	179.383	1.16267	0.129698	8.96449	3.12e-19	1.89e-17	16.7235	NM_023258	66824	PYD and CARD domain containing [Source:MGI Symbol;Acc:MGI:1931465]	66824	7	127588880	127593039	q	-1
NM_021281.2	Ctss	6200.34	1.06461	0.118891	8.95452	3.41e-19	1.9e-17	16.7212	NM_021281	13040	cathepsin S [Source:MGI Symbol;Acc:MGI:107341]	13040	3	95434097	95463714	q	1
NM_010821.1	Mpeg1	1491.53	1.28707	0.143924	8.9427	3.8e-19	7.19e-17	16.1433	NM_010821	17476	macrophage expressed gene 1 [Source:MGI Symbol;Acc:MGI:1333743]	17476	19	12438143	12442649	q	1
NM_009779.2	C3ar1	299.044	1.24979	0.142904	8.74562	2.22e-18	1.14e-16	15.9431	NM_009779	12267	complement component 3a receptor 1 [Source:MGI Symbol;Acc:MGI:1097680]	12267	6	122824097	122833120	q	-1
NM_144559.1	Fcgr4	62.5935	2.04318	0.234619	8.70853	3.08e-18	1.47e-16	15.8327	NM_144559	246256	Fc receptor, IgG, low affinity IV [Source:MGI Symbol;Acc:MGI:2179523]	246256	1	170846489	170857330	q	1
NM_011337.2	Ccl3	141.482	2.7088	0.319569	8.47642	2.32e-17	9.7e-16	15.0132	NM_011337	20302	C-C motif chemokine ligand 3 [Source:MGI Symbol;Acc:MGI:98260]	20302	11	83538670	83540181	q	-1
NM_008479.1	Lag3	524.469	1.35546	0.159806	8.48194	2.21e-17	9.7e-16	15.0132	NM_008479	16768	lymphocyte-activation gene 3 [Source:MGI Symbol;Acc:MGI:106588]	16768	6	124881324	124888668	q	-1
NM_001252651.1	Csf3r	161.126	1.09723	0.130183	8.42839	3.5e-17	1.38e-15	14.8601	NM_001252651	12986	colony stimulating factor 3 receptor [Source:MGI Symbol;Acc:MGI:1339755]	12986	4	125918343	125938233	q	1
NM_198095.2	Bst2	243.183	2.04057	0.242431	8.41712	3.86e-17	1.43e-15	14.8447	NM_198095	69550	bone marrow stromal cell antigen 2 [Source:MGI Symbol;Acc:MGI:1916800]	69550	8	71986899	71990100	q	-1
NM_133859.2	Olfml3	1024.72	1.00621	0.118456	8.49434	1.99e-17	2.51e-15	14.6003	NM_133859	99543	olfactomedin-like 3 [Source:MGI Symbol;Acc:MGI:1914877]	99543	3	103629538	103645317	q	-1
NM_010380.3	H2-D1	810.342	1.18502	0.142598	8.31023	9.55e-17	3.36e-15	14.4737	NM_010380	14964	histocompatibility 2, D region locus 1 [Source:MGI Symbol;Acc:MGI:95896]	14964	17	35481706	35486475	q	1
NM_010501.2	Ifit3	2026.64	1.98088	0.243587	8.13213	4.22e-16	1.41e-14	13.8508	NM_010501	15959	interferon-induced protein with tetratricopeptide repeats 3 [Source:MGI Symbol;Acc:MGI:1101055]	15959	19	34560931	34566131	q	1
NM_009742.3	Bcl2a1a	361.28	1.54122	0.187937	8.20072	2.39e-16	2.01e-14	13.6968	NM_009742	12044	B cell leukemia/lymphoma 2 related protein A1a [Source:MGI Symbol;Acc:MGI:102687]	12044	9	88838953	88844472	q	1
NM_013532.3	Lilrb4a	134.37	2.10077	0.256905	8.17724	2.9e-16	2.2e-14	13.6576	NM_013532	14728	leukocyte immunoglobulin-like receptor, subfamily B, member 4A [Source:MGI Symbol;Acc:MGI:102701]	14728	10	51367052	51372707	q	1
NM_008404.5	Itgb2	259.149	1.1491	0.144085	7.97518	1.52e-15	4.84e-14	13.3152	NM_008404	16414	integrin beta 2 [Source:MGI Symbol;Acc:MGI:96611]	16414	10	77366086	77401542	q	1
NM_172689.3	Ddx58	375.416	1.1316	0.14293	7.91713	2.43e-15	7.38e-14	13.1319	NM_172689	230073	RNA sensor RIG-I [Source:MGI Symbol;Acc:MGI:2442858]	230073	4	40203773	40239828	q	-1
NM_001077189.1	Fcgr2b	266.942	1.224	0.156616	7.81527	5.48e-15	1.59e-13	12.7986	NM_001077189	14130	Fc receptor, IgG, low affinity IIb [Source:MGI Symbol;Acc:MGI:95499]	14130	1	170786186	170804116	q	-1
NM_145211.2	Oas1a	183.414	1.73307	0.222578	7.78633	6.9e-15	1.92e-13	12.7167	NM_145211	246730	2'-5' oligoadenylate synthetase 1A [Source:MGI Symbol;Acc:MGI:2180860]	246730	5	121034319	121045584	q	-1
NM_031376.3	Pik3ap1	259.108	1.07074	0.137761	7.77249	7.7e-15	2.06e-13	12.6861	NM_031376	83490	phosphoinositide-3-kinase adaptor protein 1 [Source:MGI Symbol;Acc:MGI:1933177]	83490	19	41260816	41373541	q	-1
NM_007572.2	C1qa	3008.74	0.927711	0.119471	7.76518	8.15e-15	4.19e-13	12.3778	NM_007572	12259	complement component 1, q subcomponent, alpha polypeptide [Source:MGI Symbol;Acc:MGI:88223]	12259	4	136623228	136626114	q	-1
NM_030707.3	Fcrls	665.757	1.02073	0.131486	7.76302	8.29e-15	4.19e-13	12.3778	NM_030707	80891	Fc receptor like 2 [Source:MGI Symbol;Acc:MGI:1933397]	80891	3	87158065	87171045	q	-1
NM_030682.1	Tlr1	81.3766	1.29075	0.168197	7.67404	1.67e-14	4.28e-13	12.3686	NM_030682	21897	toll-like receptor 1 [Source:MGI Symbol;Acc:MGI:1341295]	21897	5	65082022	65090906	q	-1
NM_021274.2	Cxcl10	157.246	2.92967	0.382758	7.65412	1.95e-14	4.82e-13	12.317	NM_021274	15945	C-X-C motif chemokine ligand 10 [Source:MGI Symbol;Acc:MGI:1352450]	15945	5	92494497	92496748	q	-1
NM_022325.4	Ctsz	2876.96	0.778464	0.101865	7.6421	2.14e-14	5.1e-13	12.2924	NM_022325	64138	cathepsin Z [Source:MGI Symbol;Acc:MGI:1891190]	64138	2	174269286	174280832	q	-1
NM_013653.1	Ccl5	134.631	2.46155	0.322607	7.6302	2.34e-14	5.4e-13	12.2676	NM_013653	20304	C-C motif chemokine ligand 5 [Source:MGI Symbol;Acc:MGI:98262]	20304	11	83416604	83421344	q	-1
NM_001161730.1	Tap1	144.227	1.09176	0.144087	7.57706	3.53e-14	7.87e-13	12.104	NM_001161730	21354	transporter 1, ATP-binding cassette, sub-family B (MDR/TAP) [Source:MGI Symbol;Acc:MGI:98483]	21354	17	34406527	34416199	q	1
NM_007574.2	C1qc	3197.61	0.972059	0.126825	7.66457	1.79e-14	7.99e-13	12.0975	NM_007574	12262	complement component 1, q subcomponent, C chain [Source:MGI Symbol;Acc:MGI:88225]	12262	4	136617115	136620376	q	-1
NM_015783.3	Isg15	470.435	2.27622	0.303085	7.51016	5.91e-14	1.23e-12	11.9101	NM_015783	100038882	ISG15 ubiquitin-like modifier [Source:MGI Symbol;Acc:MGI:1855694]	100038882	4	156283912	156285253	q	-1
NM_021394.2	Zbp1	61.4364	2.07774	0.276536	7.51345	5.76e-14	1.23e-12	11.9101	NM_021394	58203	Z-DNA binding protein 1 [Source:MGI Symbol;Acc:MGI:1927449]	58203	2	173048405	173060716	q	-1
NM_001291058.1	Cd68	865.311	1.0837	0.144923	7.47781	7.56e-14	1.53e-12	11.8153	NM_001291058	12514	CD68 antigen [Source:MGI Symbol;Acc:MGI:88342]	12514	11	69555039	69556979	q	-1
NM_020044.3	Lat2	104.039	1.26341	0.169171	7.46825	8.13e-14	1.6e-12	11.7959	NM_020044	56743	linker for activation of T cells family, member 2 [Source:MGI Symbol;Acc:MGI:1926479]	56743	5	134628876	134643879	q	-1
NM_011905.3	Tlr2	86.9992	1.60299	0.215451	7.44016	1.01e-13	1.92e-12	11.7167	NM_011905	24088	toll-like receptor 2 [Source:MGI Symbol;Acc:MGI:1346060]	24088	3	83743579	83749074	q	-1
NM_011355.1	Spi1	249.849	0.988693	0.133741	7.39261	1.44e-13	2.67e-12	11.5735	NM_011355	20375	Spi-1 proto-oncogene [Source:MGI Symbol;Acc:MGI:98282]	20375	2	90912735	90946101	q	1
NM_001252472.1	Cd84	407.272	1.22155	0.166858	7.32089	2.46e-13	4.45e-12	11.3516	NM_001252472	12523	CD84 antigen [Source:MGI Symbol;Acc:MGI:1336885]	12523	1	171667265	171718285	q	1
NM_009777.2	C1qb	4955.41	0.939078	0.126511	7.42289	1.15e-13	4.57e-12	11.3401	NM_009777	12260	complement component 1, q subcomponent, beta polypeptide [Source:MGI Symbol;Acc:MGI:88224]	12260	4	136607440	136613498	q	-1
NM_023065.3	Ifi30	233.231	0.907353	0.122375	7.41455	1.22e-13	4.62e-12	11.3354	NM_023065	65972	interferon gamma inducible protein 30 [Source:MGI Symbol;Acc:MGI:2137648]	65972	8	71215419	71219307	q	-1
NM_011662.2	Tyrobp	1938	1.21244	0.165877	7.30923	2.69e-13	4.72e-12	11.3261	NM_011662	22177	TYRO protein tyrosine kinase binding protein [Source:MGI Symbol;Acc:MGI:1277211]	22177	7	30113185	30117010	q	1
NM_019388.3	Cd86	172.576	1.11171	0.15234	7.29753	2.93e-13	5.02e-12	11.2993	NM_019388	12524	CD86 antigen [Source:MGI Symbol;Acc:MGI:101773]	12524	16	36424231	36486443	q	-1
NM_181545.4	Slfn8	120.233	1.48591	0.201335	7.38029	1.58e-13	5.69e-12	11.2449	NM_181545	276950	schlafen 8 [Source:MGI Symbol;Acc:MGI:2672859]	276950	11	82892984	82911636	q	-1
NM_010696.4	Lcp2	202.872	0.880382	0.121317	7.25689	3.96e-13	6.61e-12	11.1798	NM_010696	16822	lymphocyte cytosolic protein 2 [Source:MGI Symbol;Acc:MGI:1321402]	16822	11	33996920	34042295	q	1
NM_008331.2	Ifit1	434.379	2.22169	0.309486	7.17864	7.04e-13	1.15e-11	10.9393	NM_008331	15957	interferon-induced protein with tetratricopeptide repeats 1 [Source:MGI Symbol;Acc:MGI:99450]	15957	19	34618271	34627409	q	1
NM_011163.4	Eif2ak2	487.859	0.932307	0.130601	7.13858	9.43e-13	1.5e-11	10.8239	NM_011163	19106	eukaryotic translation initiation factor 2-alpha kinase 2 [Source:MGI Symbol;Acc:MGI:1353449]	19106	17	79159993	79190002	q	-1
NM_030253.2	Parp9	259.989	1.13475	0.15951	7.11397	1.13e-12	1.75e-11	10.757	NM_030253	80285	poly (ADP-ribose) polymerase family, member 9 [Source:MGI Symbol;Acc:MGI:1933117]	80285	16	35758840	35792975	q	1
NM_027320.4	Ifi35	231.117	0.958434	0.13516	7.09113	1.33e-12	2.02e-11	10.6946	NM_027320	70110	interferon-induced protein 35 [Source:MGI Symbol;Acc:MGI:1917360]	70110	11	101339233	101349524	q	1
NM_133871.2	Ifi44	205.389	2.06719	0.292471	7.06804	1.57e-12	2.33e-11	10.6326	NM_133871	99899	interferon-induced protein 44 [Source:MGI Symbol;Acc:MGI:2443016]	99899	3	151436559	151455597	q	-1
NM_013652.1	Ccl4	63.1342	1.96564	0.280966	6.996	2.63e-12	3.82e-11	10.4179	NM_013652	20303	C-C motif chemokine ligand 4 [Source:MGI Symbol;Acc:MGI:98261]	20303	11	83553410	83555509	q	1
NM_031254.2	Trem2	752.443	1.07801	0.151984	7.09289	1.31e-12	4.32e-11	10.3645	NM_031254	83433	triggering receptor expressed on myeloid cells 2 [Source:MGI Symbol;Acc:MGI:1913150]	83433	17	48653429	48661175	q	1
NM_011210.3	Ptprc	189.88	1.33601	0.192622	6.93588	4.04e-12	5.74e-11	10.2411	NM_011210	19264	protein tyrosine phosphatase receptor type C [Source:MGI Symbol;Acc:MGI:97810]	19264	1	137990599	138103446	q	-1
NM_030720.1	Gpr84	116.655	1.10233	0.156653	7.0368	1.97e-12	5.96e-11	10.2248	NM_030720	80910	G protein-coupled receptor 84 [Source:MGI Symbol;Acc:MGI:1934129]	80910	15	103216662	103219039	q	-1
NM_011333.3	Ccl2	69.5332	2.21973	0.324953	6.83092	8.44e-12	1.17e-10	9.93181	NM_011333	20296	C-C motif chemokine ligand 2 [Source:MGI Symbol;Acc:MGI:98259]	20296	11	81926397	81928279	q	1
NM_009008.3	Rac2	164.055	0.954226	0.142518	6.69548	2.15e-11	2.93e-10	9.53313	NM_009008	19354	Rac family small GTPase 2 [Source:MGI Symbol;Acc:MGI:97846]	19354	15	78443367	78456983	q	-1
NM_013545.2	Ptpn6	225.227	1.0038	0.151554	6.62338	3.51e-11	4.69e-10	9.32883	NM_013545	15170	protein tyrosine phosphatase, non-receptor type 6 [Source:MGI Symbol;Acc:MGI:96055]	15170	6	124697670	124715677	q	-1
NM_021887.1	Il21r	73.413	1.02422	0.154906	6.61188	3.79e-11	4.97e-10	9.30364	NM_021887	60504	interleukin 21 receptor [Source:MGI Symbol;Acc:MGI:1890475]	60504	7	125202601	125232742	q	1
NM_008534.2	Ly9	82.4558	1.37546	0.205004	6.70941	1.95e-11	5.48e-10	9.26122	NM_008534	17085	lymphocyte antigen 9 [Source:MGI Symbol;Acc:MGI:96885]	17085	1	171416192	171434978	q	-1
NM_009252.2	Serpina3n	205.475	1.59015	0.239148	6.64921	2.95e-11	7.97e-10	9.09854	NM_009252	20716	serine (or cysteine) peptidase inhibitor, clade A, member 3N [Source:MGI Symbol;Acc:MGI:105045]	20716	12	104372988	104380588	q	1
NM_145581.1	Siglecf	75.7868	2.01386	0.303173	6.64261	3.08e-11	8.04e-10	9.09474	NM_145581	233186	sialic acid binding Ig-like lectin F [Source:MGI Symbol;Acc:MGI:2681107]	233186	7	43000765	43008955	q	1
NM_009917.5	Ccr5	373.34	0.905612	0.139184	6.50657	7.69e-11	9.88e-10	9.00524	NM_009917	12774	C-C motif chemokine receptor 5 [Source:MGI Symbol;Acc:MGI:107182]	12774	9	123921580	123947736	q	1
NM_013673.3	Sp100	402.373	0.740215	0.114347	6.47341	9.58e-11	1.21e-09	8.91721	NM_013673	20684	nuclear antigen Sp100 [Source:MGI Symbol;Acc:MGI:109561]	20684	1	85577709	85637719	q	1
NM_010185.4	Fcer1g	499.463	0.983476	0.151124	6.50775	7.63e-11	1.92e-09	8.7167	NM_010185	14127	Fc receptor, IgE, high affinity I, gamma polypeptide [Source:MGI Symbol;Acc:MGI:95496]	14127	1	171057141	171061934	q	-1
NM_009283.3	Stat1	1055.1	1.25489	0.196797	6.37655	1.81e-10	2.24e-09	8.64975	NM_009283	20846	signal transducer and activator of transcription 1 [Source:MGI Symbol;Acc:MGI:103063]	20846	1	52158599	52201024	q	1
NM_008320.3	Irf8	151.337	1.07797	0.168433	6.40001	1.55e-10	3.79e-09	8.42136	NM_008320	15900	interferon regulatory factor 8 [Source:MGI Symbol;Acc:MGI:96395]	15900	8	121463097	121483433	q	1
NM_010877.4	Ncf2	195.414	0.885273	0.140803	6.28731	3.23e-10	3.92e-09	8.40671	NM_010877	17970	neutrophil cytosolic factor 2 [Source:MGI Symbol;Acc:MGI:97284]	17970	1	152675945	152712742	q	1
NM_008175.3	Grn	2110.47	0.823745	0.129742	6.34909	2.17e-10	4.97e-09	8.30364	NM_008175	14824	granulin [Source:MGI Symbol;Acc:MGI:95832]	14824	11	102321141	102327874	q	1
NM_011577.1	Tgfb1	476.556	0.736929	0.118211	6.23401	4.55e-10	5.42e-09	8.266	NM_011577	21803	transforming growth factor, beta 1 [Source:MGI Symbol;Acc:MGI:98725]	21803	7	25386427	25404502	q	1
NM_001082960.1	Itgam	843.647	0.65792	0.105835	6.21647	5.08e-10	5.96e-09	8.22475	NM_001082960	16409	integrin alpha M [Source:MGI Symbol;Acc:MGI:96607]	16409	7	127661812	127717663	q	1
NM_019549.2	Plek	213.432	0.762962	0.122835	6.21127	5.26e-10	6.05e-09	8.21824	NM_019549	56193	pleckstrin [Source:MGI Symbol;Acc:MGI:1860485]	56193	11	16921206	17002381	q	-1
NM_027835.2	Ifih1	293.141	1.03065	0.166999	6.1716	6.76e-10	7.65e-09	8.11634	NM_027835	71586	interferon induced with helicase C domain 1 [Source:MGI Symbol;Acc:MGI:1918836]	71586	2	62426142	62476599	q	-1
NM_011413.2	C4a	1949.26	1.26964	0.203534	6.23799	4.43e-10	9.59e-09	8.01818	NM_011413	625018	complement C4A (Rodgers blood group) [Source:MGI Symbol;Acc:MGI:98320]	625018	17	35028069	35042440	q	-1
NM_001113474.1	Lair1	429.949	0.632194	0.102208	6.18538	6.2e-10	1.27e-08	7.8962	NM_001113474	52855	leukocyte-associated Ig-like receptor 1 [Source:MGI Symbol;Acc:MGI:105492]	52855	7	4006401	4066178	q	-1
NM_033374.3	Dock2	304.353	0.959824	0.155744	6.16284	7.15e-10	1.39e-08	7.85699	NM_033374	94176	dedicator of cyto-kinesis 2 [Source:MGI Symbol;Acc:MGI:2149010]	94176	11	34176815	34674719	q	-1
NM_029612.4	Slamf9	173.796	1.31259	0.213243	6.15539	7.49e-10	1.42e-08	7.84771	NM_029612	98365	SLAM family member 9 [Source:MGI Symbol;Acc:MGI:1923692]	98365	1	172302925	172306142	q	1
NM_172285.1	Plcg2	223.645	0.606901	0.100849	6.01793	1.77e-09	1.97e-08	7.70553	NM_172285	234779	phospholipase C, gamma 2 [Source:MGI Symbol;Acc:MGI:97616]	234779	8	118225030	118361881	q	1
NM_001110192.1	Inpp5d	113.932	0.724367	0.11943	6.0652	1.32e-09	2.32e-08	7.63451	NM_001110192	16331	inositol polyphosphate-5-phosphatase D [Source:MGI Symbol;Acc:MGI:107357]	16331	1	87548034	87648229	q	1
NM_013585.2	Psmb9	111.079	0.975592	0.162959	5.98674	2.14e-09	2.34e-08	7.63078	NM_013585	16912	proteasome (prosome, macropain) subunit, beta type 9 (large multifunctional peptidase 2) [Source:MGI Symbol;Acc:MGI:1346526]	16912	17	34400961	34406738	q	-1
NM_010188.5	Fcgr3	247.814	0.843313	0.13928	6.05479	1.41e-09	2.37e-08	7.62525	NM_010188	14131	Fc receptor, IgG, low affinity III [Source:MGI Symbol;Acc:MGI:95500]	14131	1	170878743	170892504	q	-1
NM_011539.3	Tbxas1	236.651	0.79181	0.133711	5.9218	3.18e-09	3.43e-08	7.46471	NM_011539	21391	thromboxane A synthase 1, platelet [Source:MGI Symbol;Acc:MGI:98497]	21391	6	38852338	39061519	q	1
NM_008798.2	Pdcd1	42.6466	1.45843	0.247641	5.88931	3.88e-09	4.11e-08	7.38616	NM_008798	18566	programmed cell death 1 [Source:MGI Symbol;Acc:MGI:104879]	18566	1	93966027	93980278	q	-1
NM_153564.2	Gbp5	178.768	0.803055	0.137436	5.84311	5.12e-09	5.35e-08	7.27165	NM_153564	229898	guanylate binding protein 5 [Source:MGI Symbol;Acc:MGI:2429943]	229898	3	142199739	142228105	q	1
NM_001037713.3	Xaf1	755.807	0.646248	0.11109	5.81733	5.98e-09	6.14e-08	7.21183	NM_001037713	327959	XIAP associated factor 1 [Source:MGI Symbol;Acc:MGI:3772572]	327959	11	72192455	72204559	q	1
NM_010442.2	Hmox1	160.441	0.684373	0.118481	5.77621	7.64e-09	7.73e-08	7.11182	NM_010442	15368	heme oxygenase 1 [Source:MGI Symbol;Acc:MGI:96163]	15368	8	75820249	75827217	q	1
NM_019949.2	Ube2l6	248.961	0.819228	0.142297	5.75717	8.55e-09	8.53e-08	7.06905	NM_019949	56791	ubiquitin-conjugating enzyme E2L 6 [Source:MGI Symbol;Acc:MGI:1914500]	56791	2	84629172	84640679	q	1
NM_019456.2	Apbb1ip	561.177	0.713015	0.124118	5.74466	9.21e-09	9.05e-08	7.04335	NM_019456	54519	amyloid beta precursor protein binding family B member 1 interacting protein [Source:MGI Symbol;Acc:MGI:1861354]	54519	2	22664106	22765665	q	1
NM_001286037.1	Ncf1	145.52	0.765434	0.133417	5.73717	9.63e-09	9.32e-08	7.03058	NM_001286037	17969	neutrophil cytosolic factor 1 [Source:MGI Symbol;Acc:MGI:97283]	17969	5	134248907	134258479	q	-1
NM_001013371.2	Dtx3l	232.052	0.810744	0.142978	5.6704	1.42e-08	1.35e-07	6.86967	NM_001013371	209200	deltex 3-like, E3 ubiquitin ligase [Source:MGI Symbol;Acc:MGI:2656973]	209200	16	35746881	35759521	q	-1
NM_001247984.1	Lcp1	464.253	0.757047	0.133595	5.66674	1.46e-08	1.35e-07	6.86967	NM_001247984	18826	lymphocyte cytosolic protein 1 [Source:MGI Symbol;Acc:MGI:104808]	18826	14	75368541	75468282	q	1
NM_010846.1	Mx1	48.4784	1.68724	0.297708	5.66743	1.45e-08	1.35e-07	6.86967	NM_010846	NA	NA	NA	NA	NA	NA	NA	NA
NM_008677.2	Ncf4	104.693	0.818218	0.14546	5.62502	1.85e-08	1.7e-07	6.76955	NM_008677	17972	neutrophil cytosolic factor 4 [Source:MGI Symbol;Acc:MGI:109186]	17972	15	78129001	78146780	q	1
NM_009987.4	Cx3cr1	1605.28	0.66203	0.117772	5.62128	1.9e-08	1.71e-07	6.767	NM_009987	13051	C-X3-C motif chemokine receptor 1 [Source:MGI Symbol;Acc:MGI:1333815]	13051	9	119877749	119898945	q	-1
NM_008394.3	Irf9	841.922	0.988256	0.176517	5.59864	2.16e-08	1.92e-07	6.7167	NM_008394	16391	interferon regulatory factor 9 [Source:MGI Symbol;Acc:MGI:107587]	16391	14	55841028	55847487	q	1
NM_010260.1	Gbp2	109.712	1.30776	0.235275	5.55843	2.72e-08	2.39e-07	6.6216	NM_010260	14469	guanylate binding protein 2 [Source:MGI Symbol;Acc:MGI:102772]	14469	3	142326363	142343769	q	1
NM_001145953.1	Lgals3	210.497	1.18139	0.213814	5.5253	3.29e-08	2.85e-07	6.54516	NM_001145953	16854	lectin, galactose binding, soluble 3 [Source:MGI Symbol;Acc:MGI:96778]	16854	14	47605208	47623617	q	1
NM_008873.3	Plau	115.015	1.17134	0.212617	5.50914	3.61e-08	3.09e-07	6.51004	NM_008873	18792	plasminogen activator, urokinase [Source:MGI Symbol;Acc:MGI:97611]	18792	14	20886728	20893453	q	1
NM_008278.2	Hpgd	188.19	0.80435	0.14634	5.49646	3.87e-08	3.27e-07	6.48545	NM_008278	15446	hydroxyprostaglandin dehydrogenase 15 (NAD) [Source:MGI Symbol;Acc:MGI:108085]	15446	8	56747620	56774078	q	1
NM_021384.4	Rsad2	98.7336	1.55518	0.283025	5.49486	3.91e-08	3.27e-07	6.48545	NM_021384	58185	radical S-adenosyl methionine domain containing 2 [Source:MGI Symbol;Acc:MGI:1929628]	58185	12	26492745	26506451	q	-1
NM_009841.3	Cd14	92.8657	1.011	0.184677	5.47442	4.39e-08	3.62e-07	6.44129	NM_009841	12475	CD14 antigen [Source:MGI Symbol;Acc:MGI:88318]	12475	18	36858120	36859851	q	-1
NM_025378.2	Ifitm3	1942.82	1.20576	0.221041	5.45489	4.9e-08	3.99e-07	6.39903	NM_025378	66141	interferon induced transmembrane protein 3 [Source:MGI Symbol;Acc:MGI:1913391]	66141	7	140589499	140590683	q	-1
NM_007780.4	Csf2rb	46.8783	1.17687	0.216595	5.43349	5.53e-08	4.45e-07	6.35164	NM_007780	12983	colony stimulating factor 2 receptor, beta, low-affinity (granulocyte-macrophage) [Source:MGI Symbol;Acc:MGI:1339759]	12983	15	78209952	78238047	q	1
NM_001172117.1	Hck	104.466	0.812083	0.14954	5.43054	5.62e-08	4.47e-07	6.34969	NM_001172117	15162	hemopoietic cell kinase [Source:MGI Symbol;Acc:MGI:96052]	15162	2	152950388	152993361	q	1
NM_008528.4	Blnk	201.953	0.76728	0.139243	5.51037	3.58e-08	5.21e-07	6.28316	NM_008528	17060	B cell linker [Source:MGI Symbol;Acc:MGI:96878]	17060	19	40917371	40982978	q	-1
NM_026790.2	Ifi27	186.219	0.841906	0.157838	5.33397	9.61e-08	7.55e-07	6.12205	NM_026790	52668	interferon, alpha-inducible protein 27 [Source:MGI Symbol;Acc:MGI:1277180]	52668	12	103400470	103406498	q	1
NM_007498.3	Atf3	181.236	2.22101	0.40924	5.42716	5.73e-08	8.03e-07	6.09528	NM_007498	11910	activating transcription factor 3 [Source:MGI Symbol;Acc:MGI:109384]	11910	1	190902493	190950236	q	-1
NM_029926.5	Irak4	171.454	0.583394	0.109956	5.30569	1.12e-07	8.72e-07	6.05948	NM_029926	266632	interleukin-1 receptor-associated kinase 4 [Source:MGI Symbol;Acc:MGI:2182474]	266632	15	94441524	94479696	q	1
NM_017372.3	Lyz2	357.003	1.19192	0.22563	5.28265	1.27e-07	9.78e-07	6.00966	NM_017372	17105	lysozyme 2 [Source:MGI Symbol;Acc:MGI:96897]	17105	10	117113236	117118226	q	-1
NM_001145884.1	Itgb5	2246.94	0.418955	0.078021	5.36976	7.88e-08	1.07e-06	5.97062	NM_001145884	16419	integrin beta 5 [Source:MGI Symbol;Acc:MGI:96614]	16419	16	33650035	33769708	q	1
NM_013612.2	Slc11a1	120.254	0.949258	0.180575	5.25685	1.47e-07	1.11e-06	5.95468	NM_013612	18173	solute carrier family 11 (proton-coupled divalent metal ion transporters), member 1 [Source:MGI Symbol;Acc:MGI:1345275]	18173	1	74414354	74425221	q	1
NM_001324486.1	Il10ra	223.304	0.670114	0.127764	5.24493	1.56e-07	1.17e-06	5.93181	NM_001324486	16154	interleukin 10 receptor, alpha [Source:MGI Symbol;Acc:MGI:96538]	16154	9	45165135	45180447	q	-1
NM_133211.3	Tlr7	72.182	0.880367	0.168323	5.23023	1.69e-07	1.26e-06	5.89963	NM_133211	170743	toll-like receptor 7 [Source:MGI Symbol;Acc:MGI:2176882]	170743	X	166087925	166113554	q	-1
NM_001037859.2	Csf1r	1092.03	0.73508	0.141019	5.21265	1.86e-07	1.37e-06	5.86328	NM_001037859	12978	colony stimulating factor 1 receptor [Source:MGI Symbol;Acc:MGI:1339758]	12978	18	61233670	61265221	q	1
NM_145209.2	Oasl1	41.632	1.39632	0.26957	5.17982	2.22e-07	1.61e-06	5.79317	NM_145209	231655	2'-5' oligoadenylate synthetase-like 1 [Source:MGI Symbol;Acc:MGI:2180849]	231655	5	115061299	115075974	q	1
NM_008153.3	Cmklr1	166.892	0.651178	0.126313	5.15526	2.53e-07	1.82e-06	5.73993	NM_008153	14747	chemerin chemokine-like receptor 1 [Source:MGI Symbol;Acc:MGI:109603]	14747	5	113750415	113788487	q	-1
NM_010387.3	H2-DMb1	184.739	0.611655	0.121038	5.05343	4.34e-07	3.08e-06	5.51145	NM_010387	14999	histocompatibility 2, class II, locus Mb1 [Source:MGI Symbol;Acc:MGI:95922]	14999	17	34372046	34379204	q	1
NM_010554.4	Il1a	51.9658	0.855281	0.170861	5.00572	5.57e-07	3.91e-06	5.40782	NM_010554	16175	interleukin 1 alpha [Source:MGI Symbol;Acc:MGI:96542]	16175	2	129141530	129151892	q	-1
NM_001111058.1	Cd33	118.265	0.602309	0.118868	5.06704	4.04e-07	4.85e-06	5.31426	NM_001111058	12489	CD33 molecule [Source:MGI Symbol;Acc:MGI:99440]	12489	7	43173640	43193852	q	-1
NM_001033245.4	Hk3	98.3977	0.668024	0.136119	4.90764	9.22e-07	6.41e-06	5.19314	NM_001033245	212032	hexokinase 3 [Source:MGI Symbol;Acc:MGI:2670962]	212032	13	55153798	55169198	q	-1
NM_013482.2	Btk	76.8934	0.864336	0.172898	4.99911	5.76e-07	6.71e-06	5.17328	NM_013482	12229	Bruton agammaglobulinemia tyrosine kinase [Source:MGI Symbol;Acc:MGI:88216]	12229	X	133443085	133484319	q	-1
NM_021334.2	Itgax	38.5788	1.27313	0.261413	4.87018	1.11e-06	7.68e-06	5.11464	NM_021334	16411	integrin alpha X [Source:MGI Symbol;Acc:MGI:96609]	16411	7	127728719	127749829	q	1
NM_001033207.3	Nlrc5	39.7039	1.0593	0.218655	4.84461	1.27e-06	8.65e-06	5.06298	NM_001033207	434341	NLR family, CARD domain containing 5 [Source:MGI Symbol;Acc:MGI:3612191]	434341	8	95160984	95253900	q	1
NM_011701.4	Vim	1655.38	0.668864	0.135718	4.92834	8.29e-07	9.37e-06	5.02826	NM_011701	22352	vimentin [Source:MGI Symbol;Acc:MGI:98932]	22352	2	13578738	13587637	q	1
NM_009807.2	Casp1	63.8568	1.04844	0.217745	4.815	1.47e-06	9.93e-06	5.00305	NM_009807	12362	caspase 1 [Source:MGI Symbol;Acc:MGI:96544]	12362	9	5298508	5307290	q	1
NM_011691.4	Vav1	216.89	0.718512	0.146984	4.88839	1.02e-06	1.13e-05	4.94692	NM_011691	22324	vav 1 oncogene [Source:MGI Symbol;Acc:MGI:98923]	22324	17	57586100	57635031	q	1
NM_031178.2	Tlr9	91.9568	0.772793	0.162488	4.75599	1.97e-06	1.32e-05	4.87943	NM_031178	81897	toll-like receptor 9 [Source:MGI Symbol;Acc:MGI:1932389]	81897	9	106099797	106104082	q	1
NM_009141.3	Cxcl5	60.3575	1.12584	0.242579	4.64113	3.47e-06	2.29e-05	4.64016	NM_009141	20311	C-X-C motif chemokine ligand 5 [Source:MGI Symbol;Acc:MGI:1096868]	20311	5	90907219	90909483	q	1
NM_030701.1	Hcar2	43.8138	1.24765	0.264019	4.72559	2.29e-06	2.38e-05	4.62342	NM_030701	80885	hydroxycarboxylic acid receptor 2 [Source:MGI Symbol;Acc:MGI:1933383]	80885	5	124001633	124003562	q	-1
NM_021297.3	Tlr4	124.586	0.606909	0.133937	4.53131	5.86e-06	3.84e-05	4.41567	NM_021297	21898	toll-like receptor 4 [Source:MGI Symbol;Acc:MGI:96824]	21898	4	66745821	66848521	q	1
NM_019455.4	Hpgds	240.211	0.45726	0.0991175	4.61331	3.96e-06	4.05e-05	4.39254	NM_019455	54486	hematopoietic prostaglandin D synthase [Source:MGI Symbol;Acc:MGI:1859384]	54486	6	65094277	65121892	q	-1
NM_001136091.1	Tcirg1	307.776	0.514725	0.113985	4.51572	6.31e-06	4.09e-05	4.38828	NM_001136091	27060	T cell, immune regulator 1, ATPase, H+ transporting, lysosomal V0 protein A3 [Source:MGI Symbol;Acc:MGI:1350931]	27060	19	3946050	3957133	q	-1
NM_028261.1	Sting1	186.583	0.599652	0.133456	4.49326	7.01e-06	4.51e-05	4.34582	NM_028261	72512	stimulator of interferon response cGAMP interactor 1 [Source:MGI Symbol;Acc:MGI:1919762]	72512	18	35866732	35873607	q	-1
NM_011823.4	Gpr34	809.51	0.559339	0.122783	4.5555	5.23e-06	5.28e-05	4.27737	NM_011823	23890	G protein-coupled receptor 34 [Source:MGI Symbol;Acc:MGI:1346334]	23890	X	13498328	13507097	q	1
NM_009546.2	Trim25	355.994	0.654716	0.146987	4.45424	8.42e-06	5.33e-05	4.27327	NM_009546	217069	tripartite motif-containing 25 [Source:MGI Symbol;Acc:MGI:102749]	217069	11	88890202	88911119	q	1
NM_009515.2	Was	87.0482	0.708563	0.159116	4.45313	8.46e-06	5.33e-05	4.27327	NM_009515	22376	Wiskott-Aldrich syndrome [Source:MGI Symbol;Acc:MGI:105059]	22376	X	7947692	7956737	q	-1
NM_007609.3	Casp4	50.8091	0.88511	0.198944	4.44903	8.63e-06	5.39e-05	4.26841	NM_007609	12363	caspase 4, apoptosis-related cysteine peptidase [Source:MGI Symbol;Acc:MGI:107700]	12363	9	5308828	5336783	q	1
NM_001110320.1	Cd72	97.6609	1.56183	0.344669	4.53139	5.86e-06	5.84e-05	4.23359	NM_001110320	12517	CD72 antigen [Source:MGI Symbol;Acc:MGI:88345]	12517	4	43446462	43454628	q	-1
NM_007577.3	C5ar1	52.3526	0.869817	0.197238	4.40998	1.03e-05	6.37e-05	4.19586	NM_007577	12273	complement component 5a receptor 1 [Source:MGI Symbol;Acc:MGI:88232]	12273	7	15980668	15993465	q	-1
NM_010389.3	H2-Ob	52.1514	0.768919	0.174404	4.40883	1.04e-05	6.37e-05	4.19586	NM_010389	15002	histocompatibility 2, O region beta locus [Source:MGI Symbol;Acc:MGI:95925]	15002	17	34457877	34473388	q	1
NM_010589.5	Jak3	71.3965	0.622022	0.141694	4.3899	1.13e-05	6.89e-05	4.16178	NM_010589	16453	Janus kinase 3 [Source:MGI Symbol;Acc:MGI:99928]	16453	8	72128940	72143219	q	1
NM_010304.3	Gna15	122.084	0.755822	0.170927	4.4219	9.78e-06	9.26e-05	4.03339	NM_010304	14676	guanine nucleotide binding protein, alpha 15 [Source:MGI Symbol;Acc:MGI:95770]	14676	10	81338140	81360059	q	-1
NM_053177.1	Mcoln1	834.901	-0.211364	0.0492335	-4.29309	1.76e-05	0.000106041	3.97453	NM_053177	94178	mucolipin 1 [Source:MGI Symbol;Acc:MGI:1890498]	94178	8	3550457	3565232	q	1
NM_010833.2	Msn	370.744	0.450908	0.1028	4.38625	1.15e-05	0.000107777	3.96747	NM_010833	17698	moesin [Source:MGI Symbol;Acc:MGI:97167]	17698	X	95139648	95212158	q	1
NM_029084.3	Slamf8	40.0837	0.974279	0.222444	4.37989	1.19e-05	0.000109618	3.96012	NM_029084	74748	SLAM family member 8 [Source:MGI Symbol;Acc:MGI:1921998]	74748	1	172409325	172418135	q	-1
NM_010902.3	Nfe2l2	672.685	0.301373	0.0706396	4.26635	1.99e-05	0.000118508	3.92625	NM_010902	18024	nuclear factor, erythroid derived 2, like 2 [Source:MGI Symbol;Acc:MGI:108420]	18024	2	75505857	75534985	q	-1
NM_175316.3	Slco2b1	478.522	0.447795	0.102745	4.35833	1.31e-05	0.000119531	3.92252	NM_175316	101488	solute carrier organic anion transporter family, member 2b1 [Source:MGI Symbol;Acc:MGI:1351872]	101488	7	99307011	99360547	q	-1
NM_007573.2	C1qbp	3457.14	-0.168878	0.0396619	-4.25795	2.06e-05	0.000121961	3.91378	NM_007573	12261	complement component 1, q subcomponent binding protein [Source:MGI Symbol;Acc:MGI:1194505]	12261	11	70868662	70873852	q	-1
NM_145227.3	Oas2	63.5132	1.16525	0.273946	4.25359	2.1e-05	0.000123269	3.90915	NM_145227	246728	2'-5' oligoadenylate synthetase 2 [Source:MGI Symbol;Acc:MGI:2180852]	246728	5	120868398	120887918	q	-1
NM_009465.3	Axl	895.935	0.32783	0.0754025	4.34774	1.38e-05	0.000123957	3.90673	NM_009465	26362	AXL receptor tyrosine kinase [Source:MGI Symbol;Acc:MGI:1347244]	26362	7	25456698	25488130	q	-1
NM_009007.2	Rac1	12328.5	-0.152994	0.0352969	-4.33449	1.46e-05	0.000128601	3.89076	NM_009007	19353	Rac family small GTPase 1 [Source:MGI Symbol;Acc:MGI:97845]	19353	5	143489389	143513791	q	-1
NM_030691.1	Igsf6	56.0677	0.878706	0.203455	4.31893	1.57e-05	0.000136422	3.86512	NM_030691	80719	immunoglobulin superfamily, member 6 [Source:MGI Symbol;Acc:MGI:1891393]	80719	7	120663290	120673795	q	-1
NM_153510.3	Pilra	36.0939	1.03815	0.242524	4.28063	1.86e-05	0.000158513	3.79994	NM_153510	231805	paired immunoglobin-like type 2 receptor alpha [Source:MGI Symbol;Acc:MGI:2450529]	231805	5	137820214	137834543	q	-1
NM_010398.3	H2-T23	132.527	0.579056	0.139138	4.16174	3.16e-05	0.000183454	3.73647	NM_010398	15040	histocompatibility 2, T region locus 23 [Source:MGI Symbol;Acc:MGI:95957]	15040	17	36340665	36343747	q	-1
NM_009812.2	Casp8	131.341	0.505559	0.121929	4.14633	3.38e-05	0.000192894	3.71468	NM_009812	12370	caspase 8 [Source:MGI Symbol;Acc:MGI:1261423]	12370	1	58834533	58886662	q	1
NM_008250.2	Hlx	113.351	0.513203	0.123768	4.14651	3.38e-05	0.000192894	3.71468	NM_008250	15284	H2.0-like homeobox [Source:MGI Symbol;Acc:MGI:96109]	15284	1	184459337	184464816	q	-1
NM_001003917.3	Atg9a	4090.76	-0.256791	0.0612303	-4.19385	2.74e-05	0.000228145	3.64179	NM_001003917	245860	autophagy related 9A [Source:MGI Symbol;Acc:MGI:2138446]	245860	1	75157504	75168840	q	-1
NM_011852.2	Oas1g	48.2018	1.49116	0.355798	4.19104	2.78e-05	0.000228485	3.64114	NM_011852	23960	2'-5' oligoadenylate synthetase 1G [Source:MGI Symbol;Acc:MGI:97429]	23960	5	121014205	121025676	q	-1
XM_992714.3	Trim5	84.6748	0.647988	0.158443	4.08972	4.32e-05	0.000244491	3.61174	XM_992714	NA	NA	NA	NA	NA	NA	NA	NA
NM_021893.2	Cd274	156.074	0.743185	0.182198	4.079	4.52e-05	0.000253893	3.59535	NM_021893	60533	CD274 antigen [Source:MGI Symbol;Acc:MGI:1926446]	60533	19	29344855	29365495	q	1
NM_013477.3	Atp6v0d1	7091.59	-0.203942	0.0501989	-4.06268	4.85e-05	0.000270049	3.56856	NM_013477	11972	ATPase, H+ transporting, lysosomal V0 subunit D1 [Source:MGI Symbol;Acc:MGI:1201778]	11972	8	106251097	106292679	q	-1
NM_009370.2	Tgfbr1	1367.9	0.479567	0.118657	4.04163	5.31e-05	0.000432062	3.36445	NM_009370	21812	transforming growth factor, beta receptor I [Source:MGI Symbol;Acc:MGI:98728]	21812	4	47353222	47414931	q	1
NM_028732.4	Vsir	1230.59	0.37855	0.0958578	3.94908	7.85e-05	0.000433114	3.3634	NM_028732	74048	V-set immunoregulatory receptor [Source:MGI Symbol;Acc:MGI:1921298]	74048	10	60182630	60208463	q	1
NM_011609.2	Tnfrsf1a	467.854	0.453344	0.114871	3.94654	7.93e-05	0.000434146	3.36236	NM_011609	21937	tumor necrosis factor receptor superfamily, member 1a [Source:MGI Symbol;Acc:MGI:1314884]	21937	6	125326325	125339447	q	1
NM_025735.3	Map1lc3a	8710.22	-0.244667	0.0620314	-3.94425	8.01e-05	0.000434751	3.36176	NM_025735	66734	microtubule-associated protein 1 light chain 3 alpha [Source:MGI Symbol;Acc:MGI:1915661]	66734	2	155118217	155119993	q	1
NM_030150.2	Dhx58	224.386	0.648785	0.166454	3.89769	9.71e-05	0.000523174	3.28135	NM_030150	80861	DExH-box helicase 58 [Source:MGI Symbol;Acc:MGI:1931560]	80861	11	100585710	100595097	q	-1
NM_146162.2	Tmem119	1016.91	0.304029	0.0768437	3.95646	7.61e-05	0.000612606	3.21282	NM_146162	231633	transmembrane protein 119 [Source:MGI Symbol;Acc:MGI:2385228]	231633	5	113931790	113938577	q	-1
NM_013556.2	Hprt	2348.37	-0.251756	0.0641866	-3.92225	8.77e-05	0.000699041	3.1555	NM_013556	15452	hypoxanthine phosphoribosyltransferase 1 [Source:MGI Symbol;Acc:MGI:96217]	15452	X	52077014	52110536	q	1
NM_001165894.1	Akt1	3466.53	-0.158087	0.0414924	-3.81003	0.000138949	0.000742546	3.12928	NM_001165894	11651	thymoma viral proto-oncogene 1 [Source:MGI Symbol;Acc:MGI:87986]	11651	12	112620255	112641318	q	-1
NM_126166.2	Tlr3	481.317	0.294128	0.0776382	3.78844	0.000151596	0.000803699	3.09491	NM_126166	142980	toll-like receptor 3 [Source:MGI Symbol;Acc:MGI:2156367]	142980	8	45848702	45864117	q	-1
NM_001161714.1	Tgm1	34.2771	1.07333	0.27653	3.88141	0.000103853	0.000818923	3.08676	NM_001161714	21816	transglutaminase 1, K polypeptide [Source:MGI Symbol;Acc:MGI:98730]	21816	14	55937466	55951383	q	-1
NM_011173.2	Pros1	367.522	0.435673	0.114438	3.80706	0.000140631	0.00107533	2.96846	NM_011173	19128	protein S (alpha) [Source:MGI Symbol;Acc:MGI:1095733]	19128	16	62674670	62749709	q	1
NM_008390.1	Irf1	320.087	0.399465	0.107596	3.71264	0.000205109	0.00107884	2.96704	NM_008390	16362	interferon regulatory factor 1 [Source:MGI Symbol;Acc:MGI:96590]	16362	11	53660841	53669200	q	1
NM_001038609.2	Mapt	5776.87	-0.224631	0.0600294	-3.74202	0.000182546	0.00135478	2.86813	NM_001038609	17762	microtubule-associated protein tau [Source:MGI Symbol;Acc:MGI:97180]	17762	11	104122216	104222916	q	1
NM_011417.2	Smarca4	3651.42	-0.157108	0.0421369	-3.72852	0.000192605	0.00141556	2.84907	NM_011417	20586	SWI/SNF related, matrix associated, actin dependent regulator of chromatin, subfamily a, member 4 [Source:MGI Symbol;Acc:MGI:88192]	20586	9	21527465	21615526	q	1
NM_010764.2	Man2b1	1433.53	0.34244	0.0923146	3.70949	0.000207676	0.00149895	2.82421	NM_010764	17159	mannosidase 2, alpha B1 [Source:MGI Symbol;Acc:MGI:107286]	17159	8	85809899	85824911	q	1
NM_021880.2	Prkar1a	16510.3	-0.207131	0.0558425	-3.7092	0.000207912	0.00149895	2.82421	NM_021880	19084	protein kinase, cAMP dependent regulatory, type I, alpha [Source:MGI Symbol;Acc:MGI:104878]	19084	11	109540231	109560482	q	1
NM_010747.2	Lyn	262.562	0.490942	0.136738	3.59039	0.000330188	0.00172317	2.76367	NM_010747	17096	LYN proto-oncogene, Src family tyrosine kinase [Source:MGI Symbol;Acc:MGI:96892]	17096	4	3678115	3813122	q	1
NM_013484.2	C2	112.929	0.820204	0.230589	3.55699	0.00037513	0.00194253	2.71163	NM_013484	12263	complement C2 [Source:MGI Symbol;Acc:MGI:88226]	12263	17	35081580	35117241	q	-1
NM_009851.2	Cd44	178.497	0.866838	0.244203	3.54966	0.000385736	0.00198209	2.70288	NM_009851	12505	CD44 antigen [Source:MGI Symbol;Acc:MGI:88338]	12505	2	102641486	102732010	q	-1
NM_007471.2	App	52899.5	-0.210616	0.0594048	-3.54544	0.000391966	0.00199872	2.69925	NM_007471	11820	amyloid beta precursor protein [Source:MGI Symbol;Acc:MGI:88059]	11820	16	84746573	84970654	q	-1
NM_007509.3	Atp6v1b2	13024.2	-0.243245	0.0687033	-3.54052	0.000399343	0.00202092	2.69445	NM_007509	11966	ATPase, H+ transporting, lysosomal V1 subunit B2 [Source:MGI Symbol;Acc:MGI:109618]	11966	8	69541298	69566363	q	1
NM_008605.3	Mmp12	44.0877	1.14009	0.314399	3.62627	0.000287544	0.00205349	2.68751	NM_008605	17381	matrix metallopeptidase 12 [Source:MGI Symbol;Acc:MGI:97005]	17381	9	7344381	7369499	q	1
NM_145528.3	Atg13	2845.7	-0.175889	0.0503013	-3.49671	0.000471041	0.00236583	2.62602	NM_145528	51897	autophagy related 13 [Source:MGI Symbol;Acc:MGI:1196429]	51897	2	91504963	91540921	q	-1
NM_008349.5	Il10rb	613.258	0.27756	0.0797292	3.48129	0.000499006	0.00248758	2.60422	NM_008349	16155	interleukin 10 receptor, beta [Source:MGI Symbol;Acc:MGI:109380]	16155	16	91203052	91222722	q	1
NM_201373.4	Trim56	199.34	0.356226	0.10422	3.41802	0.000630793	0.00312126	2.50567	NM_201373	384309	tripartite motif-containing 56 [Source:MGI Symbol;Acc:MGI:2685298]	384309	5	137134498	137145063	q	-1
NM_011019.3	Osmr	217.719	0.44243	0.126162	3.50684	0.000453466	0.00320817	2.49374	NM_011019	18414	oncostatin M receptor [Source:MGI Symbol;Acc:MGI:1330819]	18414	15	6843058	6904450	q	-1
NM_018866.2	Cxcl13	37.1937	1.18498	0.348037	3.40475	0.000662244	0.00325279	2.48774	NM_018866	55985	C-X-C motif chemokine ligand 13 [Source:MGI Symbol;Acc:MGI:1888499]	55985	5	96104810	96108927	q	1
NM_001159538.1	Fgd2	131.319	0.574365	0.164107	3.49994	0.000465365	0.00326186	2.48653	NM_001159538	26382	FYVE, RhoGEF and PH domain containing 2 [Source:MGI Symbol;Acc:MGI:1347084]	26382	17	29579888	29598635	q	1
NM_001198977.1	Syk	100.138	0.532477	0.157434	3.38223	0.000719008	0.00350582	2.45521	NM_001198977	20963	spleen tyrosine kinase [Source:MGI Symbol;Acc:MGI:99515]	20963	13	52737209	52802828	q	1
NM_011018.2	Sqstm1	10263.1	-0.220162	0.0635951	-3.46193	0.000536318	0.0037247	2.42891	NM_011018	18412	sequestosome 1 [Source:MGI Symbol;Acc:MGI:107931]	18412	11	50090193	50101654	q	-1
NM_020272.2	Pik3cg	117.246	0.484353	0.144076	3.36178	0.000774429	0.00374868	2.42612	NM_020272	30955	phosphatidylinositol-4,5-bisphosphate 3-kinase catalytic subunit gamma [Source:MGI Symbol;Acc:MGI:1353576]	30955	12	32223472	32258658	q	-1
NM_008854.3	Prkaca	8672.27	-0.275883	0.0807574	-3.4162	0.000635018	0.00429204	2.36734	NM_008854	18747	protein kinase, cAMP dependent, catalytic, alpha [Source:MGI Symbol;Acc:MGI:97592]	18747	8	84699622	84723072	q	1
NM_013671.3	Sod2	8599.1	-0.222203	0.0652272	-3.4066	0.000657771	0.00440648	2.35591	NM_013671	20656	superoxide dismutase 2, mitochondrial [Source:MGI Symbol;Acc:MGI:98352]	20656	17	13225733	13258950	q	1
NM_009277.2	Trim21	81.9678	0.528702	0.160287	3.29848	0.000972107	0.00467171	2.33052	NM_009277	20821	tripartite motif-containing 21 [Source:MGI Symbol;Acc:MGI:106657]	20821	7	102207128	102214693	q	-1
NM_019584.3	Becn1	4668.36	-0.147782	0.0440485	-3.355	0.000793661	0.00522436	2.28197	NM_019584	56208	beclin 1, autophagy related [Source:MGI Symbol;Acc:MGI:1891828]	56208	11	101176778	101193112	q	-1
NM_008491.1	Lcn2	47.3469	1.056	0.324253	3.2567	0.00112716	0.00537815	2.26937	NM_008491	16819	lipocalin 2 [Source:MGI Symbol;Acc:MGI:96757]	16819	2	32274645	32278264	q	-1
NM_011530.2	Tap2	220.198	0.468488	0.144441	3.24346	0.00118086	0.00559443	2.25224	NM_011530	21355	transporter 2, ATP-binding cassette, sub-family B (MDR/TAP) [Source:MGI Symbol;Acc:MGI:98484]	21355	17	34422501	34435295	q	1
NM_008332.2	Ifit2	380.541	0.542259	0.167316	3.24094	0.00119137	0.00560446	2.25147	NM_008332	15958	interferon-induced protein with tetratricopeptide repeats 2 [Source:MGI Symbol;Acc:MGI:99449]	15958	19	34528094	34553819	q	1
NM_001013779.2	Aim2	234.963	0.416899	0.130733	3.18895	0.00142793	0.00667033	2.17585	NM_001013779	383619	absent in melanoma 2 [Source:MGI Symbol;Acc:MGI:2686159]	383619	1	173178445	173293606	q	1
NM_145827.3	Nlrp3	46.5581	0.591431	0.186361	3.17357	0.00150575	0.006985	2.15583	NM_145827	216799	NLR family, pyrin domain containing 3 [Source:MGI Symbol;Acc:MGI:2653833]	216799	11	59432394	59457782	q	1
NM_011113.4	Plaur	37.9503	0.825505	0.260294	3.17143	0.00151688	0.00698811	2.15564	NM_011113	18793	plasminogen activator, urokinase receptor [Source:MGI Symbol;Acc:MGI:97612]	18793	7	24161909	24175393	q	1
NM_207653.3	Cflar	478.393	0.252704	0.0799958	3.15897	0.00158326	0.00724394	2.14003	NM_207653	12633	CASP8 and FADD-like apoptosis regulator [Source:MGI Symbol;Acc:MGI:1336166]	12633	1	58750667	58798043	q	1
NM_011508.1	Eif1	12753.3	-0.157761	0.0485053	-3.25244	0.00114418	0.00740297	2.13059	NM_011508	20918	eukaryotic translation initiation factor 1 [Source:MGI Symbol;Acc:MGI:105125]	20918	11	100210711	100212922	q	1
NM_011861.3	Pacsin1	7832.95	-0.288929	0.0889614	-3.2478	0.00116303	0.00745213	2.12772	NM_011861	23969	protein kinase C and casein kinase substrate in neurons 1 [Source:MGI Symbol;Acc:MGI:1345181]	23969	17	27874483	27930456	q	1
NM_011593.2	Timp1	29.2292	0.739335	0.227787	3.24574	0.00117147	0.00745213	2.12772	NM_011593	21857	tissue inhibitor of metalloproteinase 1 [Source:MGI Symbol;Acc:MGI:98752]	21857	X	20736405	20740974	q	1
NM_023051.4	Clstn1	6703.48	-0.251993	0.0779761	-3.23167	0.00123068	0.00769936	2.11355	NM_023051	65945	calsyntenin 1 [Source:MGI Symbol;Acc:MGI:1929895]	65945	4	149670925	149733356	q	1
NM_017367.3	Ccni	5652.61	-0.203755	0.0631092	-3.22861	0.00124392	0.00771842	2.11247	NM_017367	12453	cyclin I [Source:MGI Symbol;Acc:MGI:1341077]	12453	5	93329792	93354354	q	-1
NM_172488.2	Lacc1	215.095	0.357248	0.110793	3.22446	0.00126212	0.00776769	2.10971	NM_172488	210808	laccase domain containing 1 [Source:MGI Symbol;Acc:MGI:2445077]	210808	14	77261640	77274344	q	-1
NM_207105.2	H2-Ab1	107.504	1.14112	0.367778	3.10274	0.00191737	0.00871295	2.05983	NM_207105	14961	histocompatibility 2, class II antigen A, beta 1 [Source:MGI Symbol;Acc:MGI:103070]	14961	17	34476663	34488393	q	1
NM_010238.3	Brd2	3569.41	-0.124252	0.0389722	-3.18822	0.0014315	0.00873909	2.05853	NM_010238	14312	bromodomain containing 2 [Source:MGI Symbol;Acc:MGI:99495]	14312	17	34330997	34341608	q	-1
NM_008599.4	Cxcl9	32.3441	0.873988	0.282007	3.09917	0.00194062	0.00875903	2.05754	NM_008599	17329	C-X-C motif chemokine ligand 9 [Source:MGI Symbol;Acc:MGI:1352449]	17329	5	92469206	92475938	q	-1
NM_001080754.1	Ambra1	3189.5	-0.183268	0.0575578	-3.18408	0.00145217	0.00879432	2.0558	NM_001080754	228361	autophagy/beclin 1 regulator 1 [Source:MGI Symbol;Acc:MGI:2443564]	228361	2	91560479	91749194	q	1
NM_010658.3	Mafb	126.531	0.614957	0.199737	3.07883	0.00207817	0.00931689	2.03073	NM_010658	16658	MAF bZIP transcription factor B [Source:MGI Symbol;Acc:MGI:104555]	16658	2	160205623	160208985	q	-1
NM_126165.1	Vps4a	2796.8	-0.201583	0.0637935	-3.15993	0.00157806	0.00948086	2.02315	NM_126165	116733	vacuolar protein sorting 4A [Source:MGI Symbol;Acc:MGI:1890520]	116733	8	107757854	107772387	q	1
NM_009469.3	Ulk1	1062.1	-0.257279	0.084596	-3.04127	0.00235581	0.0104912	1.97917	NM_009469	22241	unc-51 like kinase 1 [Source:MGI Symbol;Acc:MGI:1270126]	22241	5	110932354	110957963	q	-1
NM_013563.3	Il2rg	81.4346	0.60288	0.198515	3.03695	0.00238986	0.0105724	1.97583	NM_013563	16186	interleukin 2 receptor, gamma chain [Source:MGI Symbol;Acc:MGI:96551]	16186	X	100307984	100311861	q	-1
NM_001134383.1	Iqsec1	7036	-0.251936	0.0809311	-3.11296	0.00185218	0.0109539	1.96043	NM_001134383	232227	IQ motif and Sec7 domain 1 [Source:MGI Symbol;Acc:MGI:1196356]	232227	6	90633070	90965667	q	-1
NM_001113530.1	Csf1	1334.4	0.328565	0.109056	3.01282	0.00258836	0.0113751	1.94404	NM_001113530	12977	colony stimulating factor 1 (macrophage) [Source:MGI Symbol;Acc:MGI:1339753]	12977	3	107648364	107667785	q	-1
NM_001163394.1	Evl	1128.72	-0.202416	0.0673242	-3.00658	0.00264207	0.0114721	1.94036	NM_001163394	14026	Ena-vasodilator stimulated phosphoprotein [Source:MGI Symbol;Acc:MGI:1194884]	14026	12	108520979	108654775	q	1
NM_019963.1	Stat2	599.672	0.281699	0.0937037	3.00627	0.00264475	0.0114721	1.94036	NM_019963	20847	signal transducer and activator of transcription 2 [Source:MGI Symbol;Acc:MGI:103039]	20847	10	128106428	128128718	q	1
NM_001042605.1	Cd74	295.739	1.167	0.376829	3.09689	0.00195563	0.0114761	1.94021	NM_001042605	16149	CD74 antigen (invariant polypeptide of major histocompatibility complex, class II antigen-associated) [Source:MGI Symbol;Acc:MGI:96534]	16149	18	60936920	60945724	q	1
NM_007949.4	Ercc2	1013.35	-0.203657	0.0660834	-3.08182	0.00205742	0.0119805	1.92152	NM_007949	13871	excision repair cross-complementing rodent repair deficiency, complementation group 2 [Source:MGI Symbol;Acc:MGI:95413]	13871	7	19115935	19129619	q	1
XM_003086124.1	Ms4a4a	31.0573	0.641423	0.214757	2.98674	0.00281965	0.0121518	1.91536	XM_003086124	NA	NA	NA	NA	NA	NA	NA	NA
NM_009460.1	Sumo1	5186.59	-0.192747	0.0626794	-3.07513	0.0021041	0.0121588	1.91511	NM_009460	22218	small ubiquitin-like modifier 1 [Source:MGI Symbol;Acc:MGI:1197010]	22218	1	59625717	59709993	q	-1
NM_019491.5	Rala	1714.55	-0.121709	0.0398472	-3.05439	0.00225519	0.0129332	1.88829	NM_019491	56044	v-ral simian leukemia viral oncogene A (ras related) [Source:MGI Symbol;Acc:MGI:1927243]	56044	13	18055156	18118824	q	-1
NM_001034030.2	Limk2	2966.7	-0.272868	0.0920474	-2.96443	0.00303246	0.0129852	1.88655	NM_001034030	16886	LIM domain kinase 2 [Source:MGI Symbol;Acc:MGI:1197517]	16886	11	3294256	3359189	q	-1
NM_134250.2	Havcr2	75.7796	0.528788	0.178939	2.95512	0.00312545	0.0132981	1.87621	NM_134250	171285	hepatitis A virus cellular receptor 2 [Source:MGI Symbol;Acc:MGI:2159682]	171285	11	46345762	46372082	q	1
NM_009389.2	Tle3	566.021	-0.196561	0.0646491	-3.04044	0.00236235	0.0134459	1.87141	NM_009389	21887	transducin-like enhancer of split 3 [Source:MGI Symbol;Acc:MGI:104634]	21887	9	61279665	61325772	q	1
NM_026115.4	Hat1	1141.33	-0.153276	0.0505394	-3.0328	0.00242292	0.0136877	1.86367	NM_026115	107435	histone aminotransferase 1 [Source:MGI Symbol;Acc:MGI:96013]	107435	2	71219302	71271966	q	1
NM_001284371.1	Atf2	1728.65	-0.172641	0.0586448	-2.94384	0.00324167	0.0137053	1.86311	NM_001284371	11909	activating transcription factor 2 [Source:MGI Symbol;Acc:MGI:109349]	11909	2	73646853	73722983	q	-1
NM_009790.5	Calm1	63453	-0.186184	0.0636516	-2.92504	0.00344411	0.014394	1.84182	NM_009790	12313	calmodulin 1 [Source:MGI Symbol;Acc:MGI:88251]	12313	12	100165694	100176073	q	1
NM_001146124.1	Psap	15847.3	-0.131981	0.045126	-2.92472	0.00344766	0.014394	1.84182	NM_001146124	19156	prosaposin [Source:MGI Symbol;Acc:MGI:97783]	19156	10	60113449	60138376	q	1
NM_019781.2	Pex14	1317.64	-0.236706	0.078767	-3.00514	0.00265455	0.0147757	1.83045	NM_019781	56273	peroxisomal biogenesis factor 14 [Source:MGI Symbol;Acc:MGI:1927868]	56273	4	149044992	149184333	q	-1
NM_001043317.2	Cd22	45.0094	0.689588	0.237482	2.90374	0.00368729	0.0152988	1.81534	NM_001043317	12483	CD22 antigen [Source:MGI Symbol;Acc:MGI:88322]	12483	7	30564827	30579767	q	-1
NM_009984.4	Ctsl	3062.04	0.26009	0.0898721	2.894	0.00380369	0.0156843	1.80453	NM_009984	13039	cathepsin L [Source:MGI Symbol;Acc:MGI:88564]	13039	13	64507151	64518704	q	-1
NM_008369.1	Il3ra	32.6939	0.599167	0.208098	2.87926	0.0039861	0.0163357	1.78686	NM_008369	16188	interleukin 3 receptor, alpha chain [Source:MGI Symbol;Acc:MGI:96553]	16188	14	8113752	8123488	q	-1
NM_001195084.1	Plscr2	113.383	0.503007	0.175493	2.86625	0.00415365	0.0168461	1.7735	NM_001195084	18828	phospholipid scramblase 2 [Source:MGI Symbol;Acc:MGI:1270860]	18828	9	92157655	92179805	q	1
NM_024222.2	Stt3b	3373.68	-0.209704	0.0731776	-2.86568	0.00416109	0.0168461	1.7735	NM_024222	68292	STT3, subunit of the oligosaccharyltransferase complex, homolog B (S. cerevisiae) [Source:MGI Symbol;Acc:MGI:1915542]	68292	9	115071649	115139489	q	-1
NM_008302.3	Hsp90ab1	20966.2	-0.186483	0.0652649	-2.85733	0.00427226	0.017192	1.76467	NM_008302	15516	heat shock protein 90 alpha (cytosolic), class B member 1 [Source:MGI Symbol;Acc:MGI:96247]	15516	17	45878701	45884197	q	-1
NM_011693.2	Vcam1	398.299	0.221502	0.0778651	2.84469	0.00444547	0.0177819	1.75002	NM_011693	22329	vascular cell adhesion molecule 1 [Source:MGI Symbol;Acc:MGI:98926]	22329	3	115903598	115923337	q	-1
NM_183031.2	Gpr183	88.9496	0.550376	0.187031	2.9427	0.00325368	0.0178962	1.74724	NM_183031	321019	G protein-coupled receptor 183 [Source:MGI Symbol;Acc:MGI:2442034]	321019	14	122189963	122202607	q	-1
NM_010435.2	Hira	1204.82	-0.173968	0.0591352	-2.94186	0.00326245	0.0178962	1.74724	NM_010435	15260	histone cell cycle regulator [Source:MGI Symbol;Acc:MGI:99430]	15260	16	18695787	18789059	q	1
NM_009760.4	Bnip3	4803.88	-0.179887	0.0635265	-2.83168	0.00463044	0.0183475	1.73642	NM_009760	12176	BCL2/adenovirus E1B interacting protein 3 [Source:MGI Symbol;Acc:MGI:109326]	12176	7	138492565	138511248	q	-1
NM_029780.3	Raf1	2075.2	-0.124651	0.0440323	-2.83089	0.00464181	0.0183475	1.73642	NM_029780	110157	v-raf-leukemia viral oncogene 1 [Source:MGI Symbol;Acc:MGI:97847]	110157	6	115595028	115653596	q	-1
NM_010559.2	Il6ra	201.105	0.302458	0.103611	2.91916	0.00350979	0.0191144	1.71864	NM_010559	16194	interleukin 6 receptor, alpha [Source:MGI Symbol;Acc:MGI:105304]	16194	3	89771366	89820503	q	-1
NM_026880.2	Pink1	14070.5	-0.232571	0.0800283	-2.90611	0.00365954	0.0197876	1.70361	NM_026880	68943	PTEN induced putative kinase 1 [Source:MGI Symbol;Acc:MGI:1916193]	68943	4	138040720	138053618	q	-1
NM_177320.2	Pik3r5	47.5243	0.559048	0.201909	2.76881	0.00562613	0.0219781	1.65801	NM_177320	320207	phosphoinositide-3-kinase regulatory subunit 5 [Source:MGI Symbol;Acc:MGI:2443588]	320207	11	68322947	68388675	q	1
NM_019786.4	Tbk1	1637.06	-0.207193	0.0748132	-2.76948	0.00561467	0.0219781	1.65801	NM_019786	56480	TANK-binding kinase 1 [Source:MGI Symbol;Acc:MGI:1929658]	56480	10	121382360	121422692	q	-1
NM_009425.2	Tnfsf10	185.364	0.328118	0.119876	2.73713	0.00619775	0.0240703	1.61852	NM_009425	22035	tumor necrosis factor (ligand) superfamily, member 10 [Source:MGI Symbol;Acc:MGI:107414]	22035	3	27371177	27396576	q	1
NM_019408.2	Nfkb2	177.972	0.328323	0.120055	2.73477	0.0062424	0.0241036	1.61792	NM_019408	18034	nuclear factor of kappa light polypeptide gene enhancer in B cells 2, p49/p100 [Source:MGI Symbol;Acc:MGI:1099800]	18034	19	46292759	46300824	q	1
NM_146145.2	Jak1	2893.16	-0.131815	0.0484141	-2.72265	0.00647599	0.0248248	1.60511	NM_146145	16451	Janus kinase 1 [Source:MGI Symbol;Acc:MGI:96628]	16451	4	101009564	101122479	q	-1
NM_018851.3	Samhd1	694.075	0.199333	0.0732504	2.72125	0.0065035	0.0248248	1.60511	NM_018851	56045	SAM domain and HD domain, 1 [Source:MGI Symbol;Acc:MGI:1927468]	56045	2	156939453	156977185	q	-1
NM_010295.2	Gclc	1850.59	-0.142302	0.0502974	-2.82922	0.00466615	0.0250516	1.60117	NM_010295	14629	glutamate-cysteine ligase, catalytic subunit [Source:MGI Symbol;Acc:MGI:104990]	14629	9	77661817	77701767	q	1
NM_010511.2	Ifngr1	1121.28	0.215038	0.0794509	2.70655	0.00679863	0.0256581	1.59078	NM_010511	15979	interferon gamma receptor 1 [Source:MGI Symbol;Acc:MGI:107655]	15979	10	19467697	19485977	q	1
NM_001130458.1	Tcn2	1247.42	0.217014	0.0801529	2.70749	0.00677934	0.0256581	1.59078	NM_001130458	21452	transcobalamin 2 [Source:MGI Symbol;Acc:MGI:98534]	21452	11	3867192	3882159	q	-1
NM_015790.3	Icosl	200.985	0.329912	0.122115	2.70166	0.00689947	0.0257477	1.58926	NM_015790	50723	icos ligand [Source:MGI Symbol;Acc:MGI:1354701]	50723	10	77905136	77919747	q	1
NM_008379.3	Kpnb1	4326.01	-0.125032	0.0462553	-2.70308	0.00687005	0.0257477	1.58926	NM_008379	16211	karyopherin subunit beta 1 [Source:MGI Symbol;Acc:MGI:107532]	16211	11	97050540	97078707	q	-1
NM_023409.4	Npc2	5120.09	0.229402	0.0850759	2.69644	0.00700841	0.026009	1.58488	NM_023409	67963	NPC intracellular cholesterol transporter 2 [Source:MGI Symbol;Acc:MGI:1915213]	67963	12	84801336	84819926	q	-1
NM_007522.3	Bad	1150.6	-0.182304	0.0650012	-2.80463	0.00503747	0.0266669	1.57403	NM_007522	12015	BCL2-associated agonist of cell death [Source:MGI Symbol;Acc:MGI:1096330]	12015	19	6919229	6929267	q	1
NM_010128.4	Emp1	74.7384	0.541651	0.196001	2.76351	0.00571834	0.0298537	1.525	NM_010128	13730	epithelial membrane protein 1 [Source:MGI Symbol;Acc:MGI:107941]	13730	6	135339543	135360171	q	1
NM_009915.2	Ccr2	38.9335	0.702941	0.268135	2.62159	0.00875198	0.0323001	1.4908	NM_009915	12772	C-C motif chemokine receptor 2 [Source:MGI Symbol;Acc:MGI:106185]	12772	9	123901987	123913594	q	1
NM_133990.4	Il13ra1	329.956	0.318055	0.121856	2.61009	0.00905188	0.0328867	1.48298	NM_133990	16164	interleukin 13 receptor, alpha 1 [Source:MGI Symbol;Acc:MGI:105052]	16164	X	35375763	35434912	q	1
NM_009371.2	Tgfbr2	750.227	0.258379	0.098881	2.61303	0.00897428	0.0328867	1.48298	NM_009371	21813	transforming growth factor, beta receptor II [Source:MGI Symbol;Acc:MGI:98729]	21813	9	115913361	116004428	q	-1
NM_080560.3	Ube2n	7966.85	-0.186094	0.0713049	-2.60983	0.00905862	0.0328867	1.48298	NM_080560	93765	ubiquitin-conjugating enzyme E2N [Source:MGI Symbol;Acc:MGI:1934835]	93765	10	95351007	95381519	q	1
NM_016700.3	Mapk8	2301.77	-0.195788	0.0751117	-2.60662	0.00914401	0.0330173	1.48126	NM_016700	26419	mitogen-activated protein kinase 8 [Source:MGI Symbol;Acc:MGI:1346861]	26419	14	33099855	33169115	q	-1
NM_028261.1	Tmem173	94.5163	0.427148	0.157139	2.71829	0.00656205	0.0340238	1.46822	NM_028261	72512	stimulator of interferon response cGAMP interactor 1 [Source:MGI Symbol;Acc:MGI:1919762]	72512	18	35866732	35873607	q	-1
NM_007464.3	Birc3	91.2445	0.350242	0.129603	2.70243	0.00688347	0.0354475	1.45041	NM_007464	11796	baculoviral IAP repeat-containing 3 [Source:MGI Symbol;Acc:MGI:1197007]	11796	9	7848700	7873187	q	-1
NM_010546.2	Ikbkb	1106.37	-0.124803	0.0462416	-2.69893	0.0069562	0.03558	1.44879	NM_010546	16150	inhibitor of kappaB kinase beta [Source:MGI Symbol;Acc:MGI:1338071]	16150	8	23149228	23196605	q	-1
NM_011308.2	Ncor1	2691.94	-0.174076	0.0647928	-2.68666	0.00721706	0.0364221	1.43864	NM_011308	20185	nuclear receptor co-repressor 1 [Source:MGI Symbol;Acc:MGI:1349717]	20185	11	62207252	62349367	q	-1
NM_011739.3	Ywhaq	30040.4	-0.197595	0.0768611	-2.5708	0.0101464	0.0364398	1.43842	NM_011739	22630	tyrosine 3-monooxygenase/tryptophan 5-monooxygenase activation protein theta [Source:MGI Symbol;Acc:MGI:891963]	22630	12	21440072	21467638	q	-1
NM_007970.1	Ezh1	680.833	-0.207448	0.0776061	-2.67309	0.00751572	0.0376781	1.42391	NM_007970	14055	enhancer of zeste 1 polycomb repressive complex 2 subunit [Source:MGI Symbol;Acc:MGI:1097695]	14055	11	101081941	101117289	q	-1
NM_008368.4	Il2rb	41.1707	0.611018	0.240524	2.54036	0.0110739	0.039558	1.40277	NM_008368	16185	interleukin 2 receptor, beta chain [Source:MGI Symbol;Acc:MGI:96550]	16185	15	78363456	78379471	q	-1
NM_008587.1	Mertk	682.413	0.238493	0.0901231	2.6463	0.0081378	0.0405284	1.39224	NM_008587	17289	MER proto-oncogene tyrosine kinase [Source:MGI Symbol;Acc:MGI:96965]	17289	2	128540876	128644814	q	1
NM_009157.4	Map2k4	3556.97	-0.287614	0.114588	-2.50998	0.0120738	0.0429006	1.36754	NM_009157	26398	mitogen-activated protein kinase kinase 4 [Source:MGI Symbol;Acc:MGI:1346869]	26398	11	65579069	65679123	q	-1
NM_009677.6	Ap1g1	2884.92	-0.126132	0.0505088	-2.49723	0.0125169	0.0440067	1.35648	NM_009677	11765	adaptor protein complex AP-1, gamma 1 subunit [Source:MGI Symbol;Acc:MGI:101919]	11765	8	110505186	110590836	q	1
NM_031167.5	Il1rn	26.8165	0.548683	0.219675	2.4977	0.0125001	0.0440067	1.35648	NM_031167	16181	interleukin 1 receptor antagonist [Source:MGI Symbol;Acc:MGI:96547]	16181	2	24226865	24241506	q	1
NM_007462.3	Apc	9174.53	-0.205218	0.0785219	-2.61351	0.00896168	0.0443398	1.35321	NM_007462	11789	APC, WNT signaling pathway regulator [Source:MGI Symbol;Acc:MGI:88039]	11789	18	34353977	34455605	q	1
NM_015733.4	Casp9	504.62	-0.242683	0.0933278	-2.60033	0.00931342	0.0457809	1.33932	NM_015733	12371	caspase 9 [Source:MGI Symbol;Acc:MGI:1277950]	12371	4	141520923	141543287	q	1
NM_021504.3	Ngly1	1054.7	-0.12418	0.0500978	-2.47874	0.0131846	0.0461115	1.33619	NM_021504	59007	N-glycanase 1 [Source:MGI Symbol;Acc:MGI:1913276]	59007	14	6157837	6220483	q	-1
NM_012042.3	Cul1	4209.17	-0.145116	0.058653	-2.47414	0.0133558	0.0462261	1.33511	NM_012042	26965	cullin 1 [Source:MGI Symbol;Acc:MGI:1349658]	26965	6	47430332	47503073	q	1
NM_207692.2	Mapk9	6090.46	-0.238316	0.096294	-2.47488	0.0133282	0.0462261	1.33511	NM_207692	26420	mitogen-activated protein kinase 9 [Source:MGI Symbol;Acc:MGI:1346862]	26420	11	49737578	49777248	q	1
NM_001045481.1	Ifi203	41.5071	0.582101	0.236359	2.46279	0.0137862	0.0474702	1.32358	NM_001045481	NA	NA	NA	NA	NA	NA	NA	NA
NM_133193.3	Il1rl2	38.9891	0.467483	0.190764	2.45058	0.0142625	0.0488582	1.31106	NM_133193	107527	interleukin 1 receptor-like 2 [Source:MGI Symbol;Acc:MGI:1913107]	107527	1	40363770	40406722	q	1
NM_001252443.1	Tfg	3688.95	-0.212002	0.0823741	-2.57365	0.0100631	0.0491467	1.30851	NM_001252443	21787	Trk-fused gene [Source:MGI Symbol;Acc:MGI:1338041]	21787	16	56510695	56537813	q	-1
NM_001160403.1	Il1rapl1	581.775	-0.276417	0.113584	-2.43359	0.0149497	0.0509511	1.29285	NM_001160403	331461	interleukin 1 receptor accessory protein-like 1 [Source:MGI Symbol;Acc:MGI:2687319]	331461	X	85784476	87159251	q	-1
NM_011510.3	Abcc8	198.632	-0.295702	0.115669	-2.55644	0.0105748	0.0513149	1.28976	NM_011510	20927	ATP-binding cassette, sub-family C member 8 [Source:MGI Symbol;Acc:MGI:1352629]	20927	7	45753947	45829457	q	-1
NM_008349.5	Il10rb	521.042	0.196158	0.0769593	2.54886	0.0108077	0.0518798	1.285	NM_008349	16155	interleukin 10 receptor, beta [Source:MGI Symbol;Acc:MGI:109380]	16155	16	91203052	91222722	q	1
NM_009008.3	Rac2	40.486	0.476392	0.186953	2.54819	0.0108283	0.0518798	1.285	NM_009008	19354	Rac family small GTPase 2 [Source:MGI Symbol;Acc:MGI:97846]	19354	15	78443367	78456983	q	-1
NM_008914.2	Ppp3cb	8178.65	-0.168902	0.0663827	-2.54437	0.0109474	0.0521206	1.28299	NM_008914	19056	protein phosphatase 3, catalytic subunit, beta isoform [Source:MGI Symbol;Acc:MGI:107163]	19056	14	20549432	20596641	q	-1
NM_133872.1	Kdm1a	2058.51	-0.155251	0.0612681	-2.53396	0.0112783	0.0531496	1.2745	NM_133872	99982	lysine (K)-specific demethylase 1A [Source:MGI Symbol;Acc:MGI:1196256]	99982	4	136277851	136330034	q	-1
NM_010031.2	Defa1	27.3381	0.588186	0.244026	2.41034	0.0159375	0.0540418	1.26727	NM_010031	NA	NA	NA	NA	NA	NA	NA	NA
NM_009469.3	Ulk1	1559.12	-0.21666	0.086017	-2.5188	0.0117755	0.0550251	1.25944	NM_009469	22241	unc-51 like kinase 1 [Source:MGI Symbol;Acc:MGI:1270126]	22241	5	110932354	110957963	q	-1
NM_145827.3	Nlrp3	79.1551	0.356709	0.1433	2.48925	0.0128012	0.0590884	1.2285	NM_145827	216799	NLR family, pyrin domain containing 3 [Source:MGI Symbol;Acc:MGI:2653833]	216799	11	59432394	59457782	q	1
NM_011045.2	Pcna	2300.32	-0.118092	0.0475162	-2.48531	0.012944	0.0593856	1.22632	NM_011045	18538	proliferating cell nuclear antigen [Source:MGI Symbol;Acc:MGI:97503]	18538	2	132091082	132095234	q	-1
NM_007780.4	Csf2rb	38.128	0.472601	0.190771	2.47733	0.013237	0.060364	1.21922	NM_007780	12983	colony stimulating factor 2 receptor, beta, low-affinity (granulocyte-macrophage) [Source:MGI Symbol;Acc:MGI:1339759]	12983	15	78209952	78238047	q	1
NM_008491.1	Lcn2	50.8813	0.814047	0.329024	2.47413	0.0133561	0.0604104	1.21889	NM_008491	16819	lipocalin 2 [Source:MGI Symbol;Acc:MGI:96757]	16819	2	32274645	32278264	q	-1
NM_010849.4	Myc	174.027	0.306565	0.129739	2.36293	0.0181309	0.0611688	1.21347	NM_010849	17869	myelocytomatosis oncogene [Source:MGI Symbol;Acc:MGI:97250]	17869	15	61857240	61862223	q	1
NM_028835.1	Atg7	717.505	-0.253027	0.107476	-2.35425	0.0185599	0.0623016	1.2055	NM_028835	74244	autophagy related 7 [Source:MGI Symbol;Acc:MGI:1921494]	74244	6	114620058	114837575	q	1
NM_023764.3	Tollip	4561.12	-0.230492	0.0982138	-2.34684	0.0189334	0.0632374	1.19903	NM_023764	54473	toll interacting protein [Source:MGI Symbol;Acc:MGI:1891808]	54473	7	141428550	141472244	q	-1
NM_010559.3	Il6ra	293.796	0.243227	0.103902	2.34092	0.0192364	0.0639301	1.19429	NM_010559	16194	interleukin 6 receptor, alpha [Source:MGI Symbol;Acc:MGI:105304]	16194	3	89771366	89820503	q	-1
NM_025344.2	Eif3f	10341.9	-0.126142	0.0539349	-2.33878	0.0193468	0.0639785	1.19397	NM_025344	66085	eukaryotic translation initiation factor 3, subunit F [Source:MGI Symbol;Acc:MGI:1913335]	66085	7	108533624	108542158	q	1
NM_021878.2	Jarid2	920.96	-0.136118	0.0557044	-2.44358	0.0145423	0.0643774	1.19127	NM_021878	16468	jumonji and AT-rich interaction domain containing 2 [Source:MGI Symbol;Acc:MGI:104813]	16468	13	44882950	45075119	q	1
NM_008924.2	Prkar2a	2248.36	-0.321569	0.131519	-2.44503	0.014484	0.0643774	1.19127	NM_008924	19087	protein kinase, cAMP dependent regulatory, type II alpha [Source:MGI Symbol;Acc:MGI:108025]	19087	9	108566513	108627635	q	1
NM_009112.2	S100a10	1044.63	0.389101	0.159073	2.44605	0.014443	0.0643774	1.19127	NM_009112	20194	S100 calcium binding protein A10 (calpactin) [Source:MGI Symbol;Acc:MGI:1339468]	20194	3	93462387	93471950	q	1
NM_177614.3	Os9	2254.58	-0.154297	0.0665509	-2.31849	0.0204229	0.066875	1.17474	NM_177614	216440	amplified in osteosarcoma [Source:MGI Symbol;Acc:MGI:1924301]	216440	10	126931519	126957000	q	-1
NM_181414.5	Pik3c3	1009.92	-0.150105	0.0647114	-2.31961	0.0203622	0.066875	1.17474	NM_181414	225326	phosphatidylinositol 3-kinase catalytic subunit type 3 [Source:MGI Symbol;Acc:MGI:2445019]	225326	18	30405800	30481179	q	1
NM_174989.4	Ticam1	158.656	0.245717	0.106387	2.30964	0.020908	0.0681294	1.16667	NM_174989	106759	TIR domain containing adaptor molecule 1 [Source:MGI Symbol;Acc:MGI:2147032]	106759	17	56576319	56583786	q	-1
NM_021297.2	Tlr4	67.7069	0.360551	0.149198	2.41659	0.0156666	0.0689513	1.16146	NM_021297	21898	toll-like receptor 4 [Source:MGI Symbol;Acc:MGI:96824]	21898	4	66745821	66848521	q	1
NM_008390.1	Irf1	299.149	0.327736	0.135944	2.41081	0.015917	0.0696482	1.15709	NM_008390	16362	interferon regulatory factor 1 [Source:MGI Symbol;Acc:MGI:96590]	16362	11	53660841	53669200	q	1
NM_007508.5	Atp6v1a	9679.9	-0.250267	0.104027	-2.40579	0.0161376	0.0702077	1.15362	NM_007508	11964	ATPase, H+ transporting, lysosomal V1 subunit A [Source:MGI Symbol;Acc:MGI:1201780]	11964	16	43905765	43960068	q	-1
NM_172262.3	Kdm1b	297.294	-0.17076	0.0711219	-2.40095	0.0163525	0.0707364	1.15036	NM_172262	218214	lysine (K)-specific demethylase 1B [Source:MGI Symbol;Acc:MGI:2145261]	218214	13	47196975	47238755	q	1
NM_022653.4	Thop1	769.313	-0.162453	0.0710344	-2.28697	0.0221977	0.071981	1.14278	NM_022653	50492	thimet oligopeptidase 1 [Source:MGI Symbol;Acc:MGI:1354165]	50492	10	80905869	80918393	q	1
NM_183034.1	Plekhm1	563.531	-0.166177	0.070054	-2.37213	0.017686	0.0760701	1.11879	NM_183034	353047	pleckstrin homology domain containing, family M (with RUN domain) member 1 [Source:MGI Symbol;Acc:MGI:2443207]	353047	11	103255101	103303513	q	-1
NM_028243.3	Prcp	509.422	0.196552	0.0872819	2.25192	0.0243275	0.0785061	1.1051	NM_028243	72461	prolylcarboxypeptidase (angiotensinase C) [Source:MGI Symbol;Acc:MGI:1919711]	72461	7	92523678	92583791	q	1
NM_178703.4	Slc6a1	7882.99	-0.171232	0.0731689	-2.34022	0.0192721	0.0824238	1.08395	NM_178703	232333	solute carrier family 6 (neurotransmitter transporter, GABA), member 1 [Source:MGI Symbol;Acc:MGI:95627]	232333	6	114259596	114294493	q	1
NM_010798.3	Mif	5727.23	-0.15144	0.0679795	-2.22772	0.0258989	0.0831755	1.08	NM_010798	17319	macrophage migration inhibitory factor (glycosylation-inhibiting factor) [Source:MGI Symbol;Acc:MGI:96982]	17319	10	75695187	75696074	q	-1
NM_016791.4	Nfatc1	95.2197	0.328373	0.147653	2.22396	0.0261515	0.0835846	1.07787	NM_016791	18018	nuclear factor of activated T cells, cytoplasmic, calcineurin dependent 1 [Source:MGI Symbol;Acc:MGI:102469]	18018	18	80649420	80756286	q	-1
NM_144931.3	Nae1	1400.11	-0.132065	0.0594719	-2.22063	0.0263762	0.0839014	1.07623	NM_144931	234664	NEDD8 activating enzyme E1 subunit 1 [Source:MGI Symbol;Acc:MGI:2384561]	234664	8	105237660	105261269	q	-1
NM_009743.4	Bcl2l1	1699.17	-0.125008	0.056387	-2.21697	0.0266252	0.0842921	1.07421	NM_009743	12048	BCL2-like 1 [Source:MGI Symbol;Acc:MGI:88139]	12048	2	152622588	152673648	q	-1
NM_009890.1	Ch25h	27.3985	0.59484	0.255597	2.32726	0.0199517	0.0843766	1.07378	NM_009890	12642	cholesterol 25-hydroxylase [Source:MGI Symbol;Acc:MGI:1333869]	12642	19	34451178	34452564	q	-1
NM_008599.2	Cxcl9	26.9596	0.558408	0.239765	2.32898	0.0198601	0.0843766	1.07378	NM_008599	17329	C-X-C motif chemokine ligand 9 [Source:MGI Symbol;Acc:MGI:1352449]	17329	5	92469206	92475938	q	-1
NM_015762.2	Txnrd1	3811.95	-0.178478	0.0768456	-2.32255	0.0202033	0.084966	1.07075	NM_015762	50493	thioredoxin reductase 1 [Source:MGI Symbol;Acc:MGI:1354175]	50493	10	82669785	82733546	q	1
NM_153074.3	Lrrc25	37.1828	0.495599	0.21374	2.3187	0.0204114	0.0853672	1.06871	NM_153074	211228	leucine rich repeat containing 25 [Source:MGI Symbol;Acc:MGI:2445284]	211228	8	71068805	71074133	q	1
NM_001081567.1	Mapk10	9215.76	-0.261002	0.112769	-2.31448	0.0206414	0.0858546	1.06624	NM_001081567	26414	mitogen-activated protein kinase 10 [Source:MGI Symbol;Acc:MGI:1346863]	26414	5	103055814	103359200	q	-1
NM_008359.1	Il17ra	229.163	0.261288	0.118946	2.19669	0.0280425	0.0883604	1.05374	NM_008359	16172	interleukin 17 receptor A [Source:MGI Symbol;Acc:MGI:107399]	16172	6	120440208	120464520	q	1
NM_001314013.1	Atg5	1873.63	-0.133241	0.057973	-2.29833	0.0215431	0.0891156	1.05005	NM_001314013	11793	autophagy related 5 [Source:MGI Symbol;Acc:MGI:1277186]	11793	10	44144354	44240287	q	1
NM_026217.3	Atg12	1812.03	-0.138231	0.0635405	-2.17548	0.0295939	0.092811	1.0324	NM_026217	67526	autophagy related 12 [Source:MGI Symbol;Acc:MGI:1914776]	67526	18	46863211	46874647	q	-1
NM_013671.3	Sod2	8314.26	-0.162666	0.0749539	-2.17021	0.0299907	0.093616	1.02865	NM_013671	20656	superoxide dismutase 2, mitochondrial [Source:MGI Symbol;Acc:MGI:98352]	20656	17	13225733	13258950	q	1
NM_001113530.1	Csf1	1381.27	0.237613	0.104445	2.275	0.0229057	0.0937278	1.02813	NM_001113530	12977	colony stimulating factor 1 (macrophage) [Source:MGI Symbol;Acc:MGI:1339753]	12977	3	107648364	107667785	q	-1
NM_172599.4	Atg14	760.433	-0.174998	0.0772364	-2.26575	0.0234668	0.0955074	1.01996	NM_172599	100504663	autophagy related 14 [Source:MGI Symbol;Acc:MGI:1261775]	100504663	14	47778350	47808106	q	-1
NM_144870.5	Ndufs8	6199.31	-0.168115	0.0778485	-2.15951	0.0308107	0.0957281	1.01896	NM_144870	225887	NADH:ubiquinone oxidoreductase core subunit S8 [Source:MGI Symbol;Acc:MGI:2385079]	225887	19	3958863	3962774	q	-1
NM_011434.1	Sod1	19031.9	-0.121344	0.056245	-2.15742	0.0309733	0.0957878	1.01869	NM_011434	20655	superoxide dismutase 1, soluble [Source:MGI Symbol;Acc:MGI:98351]	20655	16	90017642	90023217	q	1
NM_011602.5	Tln1	1081.84	0.174623	0.0811921	2.15074	0.0314968	0.096958	1.01342	NM_011602	21894	talin 1 [Source:MGI Symbol;Acc:MGI:1099832]	21894	4	43531519	43562691	q	-1
NM_010851.2	Myd88	87.5118	0.3072	0.143204	2.1452	0.0319371	0.0978624	1.00938	NM_010851	17874	myeloid differentiation primary response gene 88 [Source:MGI Symbol;Acc:MGI:108005]	17874	9	119165000	119170477	q	-1
NM_173386.4	Cgas	32.276	0.415036	0.193904	2.14042	0.0323207	0.0984059	1.00698	NM_173386	214763	cyclic GMP-AMP synthase [Source:MGI Symbol;Acc:MGI:2442261]	214763	9	78337808	78350519	q	-1
NM_029005.3	Mlkl	34.1586	0.423765	0.19842	2.1357	0.0327038	0.0984059	1.00698	NM_029005	74568	mixed lineage kinase domain-like [Source:MGI Symbol;Acc:MGI:1921818]	74568	8	112038429	112064809	q	-1
NM_010893.2	Neu1	1387.39	-0.153085	0.0715674	-2.13904	0.0324327	0.0984059	1.00698	NM_010893	18010	neuraminidase 1 [Source:MGI Symbol;Acc:MGI:97305]	18010	17	35150229	35154929	q	1
NM_011708.3	Vwf	608.151	0.391974	0.18343	2.13691	0.0326056	0.0984059	1.00698	NM_011708	22371	Von Willebrand factor [Source:MGI Symbol;Acc:MGI:98941]	22371	6	125523737	125663642	q	1
NM_019584.4	Becn1	1897.16	-0.119583	0.0560646	-2.13294	0.0329294	0.0986405	1.00594	NM_019584	56208	beclin 1, autophagy related [Source:MGI Symbol;Acc:MGI:1891828]	56208	11	101176778	101193112	q	-1
NM_011401.4	Slc2a3	2241.4	-0.18137	0.085581	-2.11928	0.034067	0.101593	0.993137	NM_011401	20527	solute carrier family 2 (facilitated glucose transporter), member 3 [Source:MGI Symbol;Acc:MGI:95757]	20527	6	122704768	122778599	q	-1
NM_009942.2	Cox5b	29153.7	-0.201012	0.0900985	-2.23102	0.0256796	0.103402	0.985473	NM_009942	12859	cytochrome c oxidase subunit 5B [Source:MGI Symbol;Acc:MGI:88475]	12859	1	36730530	36732762	q	1
NM_008229.2	Hdac2	3001.89	-0.146403	0.0657832	-2.22553	0.0260456	0.10432	0.981631	NM_008229	15182	histone deacetylase 2 [Source:MGI Symbol;Acc:MGI:1097691]	15182	10	36850540	36877885	q	1
NM_011623.2	Top2a	150.059	0.849219	0.383617	2.21371	0.0268484	0.10641	0.973019	NM_011623	21973	topoisomerase (DNA) II alpha [Source:MGI Symbol;Acc:MGI:98790]	21973	11	98883769	98915015	q	-1
NM_008369.1	Il3ra	39.7784	0.471656	0.213631	2.20781	0.0272576	0.107469	0.968718	NM_008369	16188	interleukin 3 receptor, alpha chain [Source:MGI Symbol;Acc:MGI:96553]	16188	14	8113752	8123488	q	-1
NM_008886.2	Pms2	896.469	-0.194842	0.0889584	-2.19026	0.0285056	0.11066	0.956009	NM_008886	18861	PMS1 homolog2, mismatch repair system component [Source:MGI Symbol;Acc:MGI:104288]	18861	5	143846782	143870786	q	1
NM_173781.4	Rab6b	14835.7	-0.240064	0.109579	-2.1908	0.0284664	0.11066	0.956009	NM_173781	270192	RAB6B, member RAS oncogene family [Source:MGI Symbol;Acc:MGI:107283]	270192	9	102988986	103062475	q	1
NM_019641.3	Stmn1	19822.9	-0.288671	0.132531	-2.17815	0.0293951	0.113531	0.944885	NM_019641	16765	stathmin 1 [Source:MGI Symbol;Acc:MGI:96739]	16765	4	134195631	134201154	q	1
NM_010208.4	Fgr	25.5655	0.442865	0.213797	2.07142	0.0383192	0.113765	0.94399	NM_010208	14191	FGR proto-oncogene, Src family tyrosine kinase [Source:MGI Symbol;Acc:MGI:95527]	14191	4	132701406	132729221	q	1
NM_009760.4	Bnip3	6070.02	-0.193321	0.0891983	-2.16732	0.0302108	0.115503	0.937407	NM_009760	12176	BCL2/adenovirus E1B interacting protein 3 [Source:MGI Symbol;Acc:MGI:109326]	12176	7	138492565	138511248	q	-1
NM_008628.2	Msh2	1493.73	-0.276291	0.127363	-2.16932	0.0300586	0.115503	0.937407	NM_008628	17685	mutS homolog 2 [Source:MGI Symbol;Acc:MGI:101816]	17685	17	87979758	88031141	q	1
NM_001198790.1	Ak1	3650.21	-0.162931	0.0753284	-2.16294	0.030546	0.115617	0.93698	NM_001198790	11636	adenylate kinase 1 [Source:MGI Symbol;Acc:MGI:87977]	11636	2	32511770	32525070	q	1
NM_010200.2	Fgf13	4110.11	-0.306283	0.141544	-2.16387	0.0304742	0.115617	0.93698	NM_010200	14168	fibroblast growth factor 13 [Source:MGI Symbol;Acc:MGI:109178]	14168	X	58107505	58613431	q	-1
NM_009305.2	Syp	12255.7	-0.329345	0.152917	-2.15376	0.0312592	0.117728	0.929122	NM_009305	20977	synaptophysin [Source:MGI Symbol;Acc:MGI:98467]	20977	X	7504710	7519495	q	1
NM_011631.1	Hsp90b1	8001.95	-0.148748	0.0725537	-2.05018	0.0403471	0.119256	0.92352	NM_011631	22027	heat shock protein 90, beta (Grp94), member 1 [Source:MGI Symbol;Acc:MGI:98817]	22027	10	86526073	86541373	q	-1
NM_009716.2	Atf4	4789.3	-0.266796	0.130762	-2.04032	0.0413183	0.121589	0.915106	NM_009716	11911	activating transcription factor 4 [Source:MGI Symbol;Acc:MGI:88096]	11911	15	80139385	80141742	q	1
NM_001083334.1	Bin1	6124.43	-0.190716	0.0897074	-2.12598	0.0335047	0.124941	0.903294	NM_001083334	30948	bridging integrator 1 [Source:MGI Symbol;Acc:MGI:108092]	30948	18	32510283	32568790	q	1
NM_016923.1	Ly96	146.338	0.307281	0.151931	2.02251	0.0431237	0.126345	0.898443	NM_016923	17087	lymphocyte antigen 96 [Source:MGI Symbol;Acc:MGI:1341909]	17087	1	16758275	16779835	q	1
NM_007537.1	Bcl2l2	3564.96	-0.202723	0.096127	-2.10891	0.0349525	0.129069	0.889179	NM_007537	12050	BCL2-like 2 [Source:MGI Symbol;Acc:MGI:108052]	12050	14	55120834	55125691	q	1
NM_020004.5	Kat2a	1759.39	-0.170635	0.080994	-2.10676	0.0351383	0.129125	0.888991	NM_020004	14534	K(lysine) acetyltransferase 2A [Source:MGI Symbol;Acc:MGI:1343101]	14534	11	100595572	100603291	q	-1
NM_011175.3	Lgmn	4967.45	0.163138	0.0783223	2.08291	0.0372596	0.135604	0.867729	NM_011175	19141	legumain [Source:MGI Symbol;Acc:MGI:1330838]	19141	12	102360343	102406072	q	-1
NM_134437.3	Il17rd	131.485	-0.343774	0.172694	-1.99065	0.0465192	0.135698	0.867427	NM_134437	171463	interleukin 17 receptor D [Source:MGI Symbol;Acc:MGI:2159727]	171463	14	26760898	26829243	q	1
NM_013640.3	Psmb10	241.168	0.196752	0.0991647	1.98409	0.0472453	0.137217	0.862593	NM_013640	19171	proteasome (prosome, macropain) subunit, beta type 10 [Source:MGI Symbol;Acc:MGI:1096380]	19171	8	106662367	106665076	q	-1
NM_001110498.1	Ifnar2	770.335	0.174485	0.088297	1.97611	0.048142	0.139216	0.856312	NM_001110498	15976	interferon (alpha and beta) receptor 2 [Source:MGI Symbol;Acc:MGI:1098243]	15976	16	91169671	91202477	q	1
NM_134062.1	Dapk1	2775.38	-0.196701	0.0952083	-2.066	0.0388282	0.140636	0.851904	NM_134062	69635	death associated protein kinase 1 [Source:MGI Symbol;Acc:MGI:1916885]	69635	13	60749761	60911005	q	1
NM_020009.2	Mtor	1959.2	-0.167242	0.0853143	-1.9603	0.0499606	0.143852	0.842084	NM_020009	56717	mechanistic target of rapamycin kinase [Source:MGI Symbol;Acc:MGI:1928394]	56717	4	148533068	148642140	q	1
NM_010358.5	Gstm1	230.134	-0.212335	0.104074	-2.04024	0.0413266	0.146874	0.833054	NM_010358	14862	glutathione S-transferase, mu 1 [Source:MGI Symbol;Acc:MGI:95860]	14862	3	107919571	107925289	q	-1
NM_008987.3	Ptx3	27.9249	0.465088	0.227922	2.04055	0.0412954	0.146874	0.833054	NM_008987	19288	pentraxin related gene [Source:MGI Symbol;Acc:MGI:104641]	19288	3	66127331	66133226	q	1
NM_011157.2	Srgn	447.25	0.28033	0.138158	2.02905	0.042453	0.150173	0.823409	NM_011157	19073	serglycin [Source:MGI Symbol;Acc:MGI:97756]	19073	10	62329612	62363230	q	-1
NM_001205075.1	Pnoc	678.194	-0.546593	0.281922	-1.93881	0.0525244	0.150585	0.822218	NM_001205075	18155	prepronociceptin [Source:MGI Symbol;Acc:MGI:105308]	18155	14	65638122	65662921	q	-1
NM_009505.4	Vegfa	2487.87	-0.229789	0.119056	-1.93008	0.0535966	0.153002	0.815302	NM_009505	22339	vascular endothelial growth factor A [Source:MGI Symbol;Acc:MGI:103178]	22339	17	46327919	46343295	q	-1
NM_009322.3	Tbr1	87.6044	-0.507001	0.251392	-2.01677	0.0437191	0.153932	0.812671	NM_009322	21375	T-box brain transcription factor 1 [Source:MGI Symbol;Acc:MGI:107404]	21375	2	61633274	61644458	q	1
NM_001002011.2	Lmna	902.028	-0.223365	0.111189	-2.00888	0.0445495	0.155465	0.808366	NM_001002011	16905	lamin A [Source:MGI Symbol;Acc:MGI:96794]	16905	3	88387454	88417263	q	-1
NM_021390.3	Sall1	1168.93	0.183792	0.0914965	2.00873	0.0445654	0.155465	0.808366	NM_021390	58198	spalt like transcription factor 1 [Source:MGI Symbol;Acc:MGI:1889585]	58198	8	89753863	89770790	q	-1
NM_148948.2	Dicer1	1279.37	-0.150684	0.0752872	-2.00145	0.0453437	0.156023	0.80681	NM_148948	NA	NA	NA	NA	NA	NA	NA	NA
NM_008013.2	Fgl2	99.7859	0.53564	0.267327	2.00369	0.0451037	0.156023	0.80681	NM_008013	14190	fibrinogen-like protein 2 [Source:MGI Symbol;Acc:MGI:103266]	14190	5	21577640	21583372	q	1
NM_001146287.1	Cables1	1153.71	-0.230109	0.115229	-1.99697	0.0458286	0.156979	0.80416	NM_001146287	63955	CDK5 and Abl enzyme substrate 1 [Source:MGI Symbol;Acc:MGI:1927065]	63955	18	11972277	12078687	q	1
NM_001253795.1	Tarbp2	503.611	-0.172698	0.086986	-1.98536	0.0471046	0.160623	0.794193	NM_001253795	21357	TARBP2, RISC loading complex RNA binding subunit [Source:MGI Symbol;Acc:MGI:103027]	21357	15	102426627	102432111	q	1
NM_023279.2	Tubb3	11316.7	-0.322465	0.162651	-1.98256	0.0474169	0.160962	0.793276	NM_023279	22152	tubulin, beta 3 class III [Source:MGI Symbol;Acc:MGI:107813]	22152	8	124138163	124148754	q	1
NM_001001984.2	Kdm2a	1713.01	-0.163725	0.0828629	-1.97585	0.0481716	0.161906	0.790736	NM_001001984	225876	lysine (K)-specific demethylase 2A [Source:MGI Symbol;Acc:MGI:1354736]	225876	19	4364447	4448313	q	-1
NM_010738.2	Ly6a	1913.42	0.273227	0.138385	1.9744	0.0483366	0.161906	0.790736	NM_010738	110454	lymphocyte antigen 6 family member A [Source:MGI Symbol;Acc:MGI:107527]	110454	15	74866726	74869880	q	-1
NM_026474.5	Sugt1	4835.07	-0.145574	0.0765183	-1.90248	0.0571086	0.162334	0.78959	NM_026474	67955	SGT1, suppressor of G2 allele of SKP1 (S. cerevisiae) [Source:MGI Symbol;Acc:MGI:1915205]	67955	14	79825131	79872636	q	1
NM_019861.1	Ctsf	3083	-0.184598	0.0936572	-1.971	0.0487243	0.162486	0.789185	NM_019861	56464	cathepsin F [Source:MGI Symbol;Acc:MGI:1861434]	56464	19	4905158	4910946	q	1
NM_001081309.1	Pik3r4	1714.85	-0.108711	0.0572855	-1.89771	0.0577342	0.163417	0.786703	NM_001081309	75669	phosphoinositide-3-kinase regulatory subunit 4 [Source:MGI Symbol;Acc:MGI:1922919]	75669	9	105520177	105564856	q	1
NM_019794.4	Dnaja2	3422.65	-0.12755	0.0674018	-1.89238	0.05844	0.164717	0.783262	NM_019794	56445	DnaJ heat shock protein family (Hsp40) member A2 [Source:MGI Symbol;Acc:MGI:1931882]	56445	8	86264262	86281973	q	-1
NM_001038839.2	P2rx7	396.664	0.145525	0.0770896	1.88774	0.0590607	0.165767	0.780502	NM_001038839	18439	purinergic receptor P2X, ligand-gated ion channel, 7 [Source:MGI Symbol;Acc:MGI:1339957]	18439	5	122781974	122829495	q	1
NM_001159407.1	B3gnt5	50.3211	0.484192	0.247131	1.95926	0.0500828	0.166284	0.779151	NM_001159407	108105	UDP-GlcNAc:betaGal beta-1,3-N-acetylglucosaminyltransferase 5 [Source:MGI Symbol;Acc:MGI:2137302]	108105	16	19578958	19591503	q	1
NM_011499.3	Strap	3561.68	-0.15084	0.0800485	-1.88436	0.0595168	0.166348	0.778982	NM_011499	20901	serine/threonine kinase receptor associated protein [Source:MGI Symbol;Acc:MGI:1329037]	20901	6	137712076	137728930	q	1
NM_001033161.2	Tradd	123.207	-0.296457	0.151555	-1.9561	0.0504537	0.166784	0.777846	NM_001033161	71609	TNFRSF1A-associated via death domain [Source:MGI Symbol;Acc:MGI:109200]	71609	8	105984918	105991241	q	-1
NM_001136068.1	Klrc1	33.317	0.471054	0.252055	1.86886	0.0616427	0.171572	0.765553	NM_001136068	16641	killer cell lectin-like receptor subfamily C, member 1 [Source:MGI Symbol;Acc:MGI:1336161]	16641	6	129642978	129655936	q	-1
NM_010551.3	Il16	72.2698	0.285067	0.152995	1.86324	0.0624281	0.173037	0.76186	NM_010551	16170	interleukin 16 [Source:MGI Symbol;Acc:MGI:1270855]	16170	7	83292033	83394934	q	-1
NM_007499.2	Atm	406.896	-0.182655	0.0985321	-1.85376	0.0637735	0.174593	0.757973	NM_007499	11920	ataxia telangiectasia mutated [Source:MGI Symbol;Acc:MGI:107202]	11920	9	53350449	53448040	q	-1
NM_033601.3	Bcl3	31.2076	0.37556	0.202242	1.85698	0.0633139	0.174593	0.757973	NM_033601	12051	B cell leukemia/lymphoma 3 [Source:MGI Symbol;Acc:MGI:88140]	12051	7	19542387	19556695	q	-1
NM_009855.2	Cd80	53.5431	0.283639	0.152957	1.85438	0.0636852	0.174593	0.757973	NM_009855	12519	CD80 antigen [Source:MGI Symbol;Acc:MGI:101775]	12519	16	38275923	38316697	q	1
NM_009761.3	Bnip3l	5587.49	-0.153194	0.0792637	-1.93271	0.0532715	0.175333	0.756137	NM_009761	12177	BCL2/adenovirus E1B interacting protein 3-like [Source:MGI Symbol;Acc:MGI:1332659]	12177	14	67222688	67246326	q	-1
NM_001163640.1	Chn2	1953.7	-0.188249	0.0975804	-1.92917	0.0537097	0.17601	0.754463	NM_001163640	69993	chimerin 2 [Source:MGI Symbol;Acc:MGI:1917243]	69993	6	54016539	54278795	q	1
NM_010734.2	Lst1	53.531	0.335036	0.174173	1.92358	0.0544075	0.177371	0.751118	NM_010734	16988	leukocyte specific transcript 1 [Source:MGI Symbol;Acc:MGI:1096324]	16988	17	35404071	35407415	q	-1
NM_001113326.1	Msr1	32.2381	0.494206	0.257118	1.9221	0.0545936	0.177371	0.751118	NM_001113326	20288	macrophage scavenger receptor 1 [Source:MGI Symbol;Acc:MGI:98257]	20288	8	40034726	40095714	q	-1
NM_007591.3	Calr	16817.7	-0.139452	0.0726686	-1.91901	0.054983	0.177872	0.749892	NM_007591	12317	calreticulin [Source:MGI Symbol;Acc:MGI:88252]	12317	8	85568479	85573563	q	-1
NM_013752.3	Nbn	550.185	-0.139388	0.0730699	-1.9076	0.0564432	0.180587	0.743313	NM_013752	27354	nibrin [Source:MGI Symbol;Acc:MGI:1351625]	27354	4	15957925	15992589	q	1
NM_011614.3	Tnfsf12	256.108	0.151617	0.0793974	1.9096	0.0561847	0.180587	0.743313	NM_011614	21944	tumor necrosis factor (ligand) superfamily, member 12 [Source:MGI Symbol;Acc:MGI:1196259]	21944	11	69577076	69586675	q	-1
NM_207653.3	Cflar	536.968	0.141653	0.074423	1.90335	0.0569955	0.181161	0.741936	NM_207653	12633	CASP8 and FADD-like apoptosis regulator [Source:MGI Symbol;Acc:MGI:1336166]	12633	1	58750667	58798043	q	1
NM_011196.2	Ptger3	78.0783	-0.673488	0.35413	-1.90181	0.057196	0.181161	0.741936	NM_011196	19218	prostaglandin E receptor 3 (subtype EP3) [Source:MGI Symbol;Acc:MGI:97795]	19218	3	157272529	157351525	q	1
NM_001113180.1	Gria4	5246.3	-0.224332	0.118156	-1.89861	0.0576152	0.181728	0.740578	NM_001113180	14802	glutamate receptor, ionotropic, AMPA4 (alpha 4) [Source:MGI Symbol;Acc:MGI:95811]	14802	9	4417896	4796234	q	-1
NM_009005.2	Rab7	13141.7	-0.143099	0.0781756	-1.83048	0.0671785	0.183164	0.737159	NM_009005	19349	RAB7, member RAS oncogene family [Source:MGI Symbol;Acc:MGI:105068]	19349	6	87976088	88022252	q	-1
NM_009977.3	Cst7	25.7538	0.453327	0.239719	1.89108	0.0586139	0.18335	0.736719	NM_009977	13011	cystatin F (leukocystatin) [Source:MGI Symbol;Acc:MGI:1298217]	13011	2	150412335	150420864	q	1
NM_009081.2	Rpl28	13160.3	-0.135921	0.0718342	-1.89215	0.0584707	0.18335	0.736719	NM_009081	19943	ribosomal protein L28 [Source:MGI Symbol;Acc:MGI:101839]	19943	7	4795873	4798065	q	1
NM_001190449.1	Ddah2	169.64	0.242271	0.133252	1.81815	0.0690415	0.187185	0.72773	NM_001190449	51793	DDAH family member 2, ADMA independent [Source:MGI Symbol;Acc:MGI:1859016]	51793	17	35278011	35281071	q	1
NM_001114334.1	Rps6kb1	1247.11	-0.136499	0.0751223	-1.81702	0.0692135	0.187185	0.72773	NM_001114334	72508	ribosomal protein S6 kinase, polypeptide 1 [Source:MGI Symbol;Acc:MGI:1270849]	72508	11	86389697	86435631	q	-1
NM_009662.2	Alox5	56.7134	0.313283	0.172841	1.81255	0.0699015	0.187527	0.726937	NM_009662	11689	arachidonate 5-lipoxygenase [Source:MGI Symbol;Acc:MGI:87999]	11689	6	116387038	116438139	q	-1
NM_001164172.1	Map2k7	1462.43	-0.13313	0.0734047	-1.81365	0.0697317	0.187527	0.726937	NM_001164172	26400	mitogen-activated protein kinase kinase 7 [Source:MGI Symbol;Acc:MGI:1346871]	26400	8	4288740	4297897	q	1
NM_027532.3	Anapc15	694.297	-0.10491	0.0559426	-1.87531	0.06075	0.188474	0.724748	NM_027532	75430	anaphase promoting complex C subunit 15 [Source:MGI Symbol;Acc:MGI:1922680]	75430	7	101512922	101551056	q	1
NM_019408.2	Nfkb2	112.633	0.253003	0.135352	1.86922	0.0615925	0.18984	0.721613	NM_019408	18034	nuclear factor of kappa light polypeptide gene enhancer in B cells 2, p49/p100 [Source:MGI Symbol;Acc:MGI:1099800]	18034	19	46292759	46300824	q	1
NM_025587.2	Rps21	29756.2	-0.134862	0.0721765	-1.86851	0.0616916	0.18984	0.721613	NM_025587	66481	ribosomal protein S21 [Source:MGI Symbol;Acc:MGI:1913731]	66481	2	179899170	179900238	q	1
NM_009373.3	Tgm2	208.446	0.255582	0.137059	1.86476	0.0622149	0.190675	0.719707	NM_009373	21817	transglutaminase 2, C polypeptide [Source:MGI Symbol;Acc:MGI:98731]	21817	2	157958322	157988356	q	-1
NM_026959.2	Stx18	302.176	-0.172055	0.0925545	-1.85896	0.0630324	0.192401	0.715792	NM_026959	71116	syntaxin 18 [Source:MGI Symbol;Acc:MGI:1918366]	71116	5	38196086	38295109	q	1
NM_010288.3	Gja1	10147.7	0.178887	0.0965606	1.85259	0.0639412	0.194392	0.711322	NM_010288	14609	gap junction protein, alpha 1 [Source:MGI Symbol;Acc:MGI:95713]	14609	10	56253426	56278609	q	1
NM_009970.2	Csf2ra	128.186	0.262494	0.146471	1.79213	0.0731122	0.194578	0.710907	NM_009970	12982	colony stimulating factor 2 receptor, alpha, low-affinity (granulocyte-macrophage) [Source:MGI Symbol;Acc:MGI:1339754]	12982	19	61212395	61216867	q	-1
NM_011604.3	Tlr6	49.3158	0.353733	0.197193	1.79384	0.0728384	0.194578	0.710907	NM_011604	21899	toll-like receptor 6 [Source:MGI Symbol;Acc:MGI:1341296]	21899	5	65109374	65117440	q	-1
NM_024221.3	Pdhb	5627.48	-0.145511	0.0814668	-1.78614	0.0740769	0.195586	0.708661	NM_024221	68263	pyruvate dehydrogenase (lipoamide) beta [Source:MGI Symbol;Acc:MGI:1915513]	68263	14	14296748	14303777	q	1
NM_001004435.2	Pik3r6	90.2586	0.241679	0.135207	1.78747	0.0738616	0.195586	0.708661	NM_001004435	104709	phosphoinositide-3-kinase regulatory subunit 5 [Source:MGI Symbol;Acc:MGI:2144613]	104709	11	68393845	68443524	q	1
NM_008054.2	Fyn	5063.48	-0.112538	0.0630715	-1.7843	0.0743754	0.195602	0.708628	NM_008054	14360	Fyn proto-oncogene [Source:MGI Symbol;Acc:MGI:95602]	14360	10	39244851	39441377	q	1
NM_019432.2	Tmem37	70.1845	0.295115	0.160118	1.84311	0.0653128	0.196979	0.705579	NM_019432	170706	transmembrane protein 37 [Source:MGI Symbol;Acc:MGI:2157899]	170706	1	119995107	120001804	q	-1
NM_001205081.1	Trim47	240.215	0.248132	0.134567	1.84392	0.0651945	0.196979	0.705579	NM_001205081	217333	tripartite motif-containing 47 [Source:MGI Symbol;Acc:MGI:1917374]	217333	11	115996578	116018036	q	-1
NM_013681.1	Syn2	6128.91	-0.258696	0.140711	-1.8385	0.0659892	0.198229	0.702832	NM_013681	20965	synapsin II [Source:MGI Symbol;Acc:MGI:103020]	20965	6	115111863	115258967	q	1
NM_001286630.1	Brd4	2096.7	-0.149447	0.0814679	-1.83442	0.0665912	0.199247	0.700608	NM_001286630	57261	bromodomain containing 4 [Source:MGI Symbol;Acc:MGI:1888520]	57261	17	32415248	32503696	q	-1
NM_139294.5	Braf	4180.48	-0.119427	0.065302	-1.82885	0.0674223	0.20094	0.696934	NM_139294	109880	Braf transforming gene [Source:MGI Symbol;Acc:MGI:88190]	109880	6	39580171	39702397	q	-1
NM_001038587.3	Adar	2762.38	-0.169803	0.096055	-1.76777	0.0770987	0.201968	0.694717	NM_001038587	56417	adenosine deaminase, RNA-specific [Source:MGI Symbol;Acc:MGI:1889575]	56417	3	89622329	89660753	q	1
NM_008839.1	Pik3ca	2954.4	-0.114576	0.064924	-1.76476	0.0776034	0.202496	0.693583	NM_008839	18706	phosphatidylinositol-4,5-bisphosphate 3-kinase catalytic subunit alpha [Source:MGI Symbol;Acc:MGI:1206581]	18706	3	32451820	32522635	q	1
NM_177361.2	Ifna1/5/6/12/13/14/15/16/b	68.3601	0.503308	0.286291	1.75803	0.0787426	0.204669	0.688947	NM_177361	242519	interferon alpha 12 [Source:MGI Symbol;Acc:MGI:2676324]	242519	4	88520817	88521613	q	-1
NM_007837.3	Ddit3	1334	0.179649	0.102365	1.75499	0.0792612	0.205219	0.687783	NM_007837	13198	DNA-damage inducible transcript 3 [Source:MGI Symbol;Acc:MGI:109247]	13198	10	127126643	127132157	q	1
NM_024181.2	Dnajc10	3086.35	-0.119842	0.0684866	-1.74986	0.0801428	0.205905	0.686332	NM_024181	66861	DnaJ heat shock protein family (Hsp40) member C10 [Source:MGI Symbol;Acc:MGI:1914111]	66861	2	80145810	80184387	q	1
NM_011594.3	Timp2	7742.81	-0.341503	0.195005	-1.75125	0.0799024	0.205905	0.686332	NM_011594	21858	tissue inhibitor of metalloproteinase 2 [Source:MGI Symbol;Acc:MGI:98753]	21858	11	118191887	118246566	q	-1
NM_001270360.1	Ccl21a/b/c/d	124.088	-0.294154	0.168433	-1.74641	0.080739	0.206642	0.684781	NM_001270360	100862177	C-C motif chemokine ligand 21D [Source:MGI Symbol;Acc:MGI:5434896]	100862177	4	41903610	41904743	q	1
NM_030694.1	Ifitm2	508.479	0.225933	0.129502	1.74463	0.0810494	0.206645	0.684775	NM_030694	80876	interferon induced transmembrane protein 2 [Source:MGI Symbol;Acc:MGI:1933382]	80876	7	140534750	140535900	q	-1
NM_011642.3	Trp73	110.767	-0.507888	0.280022	-1.81374	0.0697174	0.206965	0.684103	NM_011642	22062	transformation related protein 73 [Source:MGI Symbol;Acc:MGI:1336991]	22062	4	154140706	154224665	q	-1
NM_009142.3	Cx3cl1	2657.04	-0.16975	0.0974969	-1.74108	0.0816694	0.207256	0.683493	NM_009142	20312	C-X3-C motif chemokine ligand 1 [Source:MGI Symbol;Acc:MGI:1097153]	20312	8	95498637	95509055	q	1
NM_010480.5	Hsp90aa1	51314.1	-0.158588	0.0911579	-1.73971	0.0819095	0.207256	0.683493	NM_010480	15519	heat shock protein 90, alpha (cytosolic), class A member 1 [Source:MGI Symbol;Acc:MGI:96250]	15519	12	110657039	110669162	q	-1
NM_010184.1	Fcer1a	27.9647	0.433726	0.249996	1.73493	0.0827532	0.2086	0.680685	NM_010184	14125	Fc receptor, IgE, high affinity I, alpha polypeptide [Source:MGI Symbol;Acc:MGI:95494]	14125	1	173048851	173054781	q	-1
NM_001025602.2	Il1rl1	30.6545	0.351408	0.202945	1.73154	0.083355	0.209327	0.679174	NM_001025602	17082	interleukin 1 receptor-like 1 [Source:MGI Symbol;Acc:MGI:98427]	17082	1	40468730	40504575	q	1
NM_029600.3	Abcc3	99.0981	0.256359	0.142102	1.80404	0.0712244	0.210462	0.676827	NM_029600	76408	ATP-binding cassette, sub-family C member 3 [Source:MGI Symbol;Acc:MGI:1923658]	76408	11	94234121	94283823	q	-1
NM_053124.2	Smarca5	3729.69	-0.0987666	0.0548507	-1.80064	0.0717591	0.210549	0.676647	NM_053124	93762	SNF2 related chromatin remodeling ATPase 5 [Source:MGI Symbol;Acc:MGI:1935129]	93762	8	81425136	81466126	q	-1
NM_001112715.1	Ifitm1	121.565	0.500405	0.290051	1.72523	0.0844863	0.211374	0.674949	NM_001112715	68713	interferon induced transmembrane protein 1 [Source:MGI Symbol;Acc:MGI:1915963]	68713	7	140547134	140549738	q	1
NM_007415.3	Parp1	468.585	-0.170098	0.0989031	-1.71984	0.085461	0.213015	0.671591	NM_007415	11545	poly (ADP-ribose) polymerase family, member 1 [Source:MGI Symbol;Acc:MGI:1340806]	11545	1	180396489	180428819	q	1
NM_001025262.1	Tpd52	3722.41	-0.116989	0.0653753	-1.7895	0.0735337	0.214923	0.667718	NM_001025262	21985	tumor protein D52 [Source:MGI Symbol;Acc:MGI:107749]	21985	3	8990653	9069783	q	-1
NM_007707.2	Socs3	51.6715	0.359042	0.210816	1.7031	0.0885487	0.219891	0.657793	NM_007707	12702	suppressor of cytokine signaling 3 [Source:MGI Symbol;Acc:MGI:1201791]	12702	11	117856905	117860873	q	-1
NM_008841.2	Pik3r2	2825.13	-0.144549	0.0814998	-1.77362	0.0761264	0.220796	0.656009	NM_008841	18709	phosphoinositide-3-kinase regulatory subunit 2 [Source:MGI Symbol;Acc:MGI:1098772]	18709	8	71220820	71229357	q	-1
NM_012052.2	Rps3	392.981	-0.144215	0.0814626	-1.77033	0.0766728	0.221532	0.654564	NM_012052	27050	ribosomal protein S3 [Source:MGI Symbol;Acc:MGI:1350917]	27050	7	99127103	99132945	q	-1
NM_008906.4	Ctsa	3078.74	0.127113	0.0751956	1.69043	0.0909464	0.225008	0.647802	NM_008906	19025	cathepsin A [Source:MGI Symbol;Acc:MGI:97748]	19025	2	164674793	164682952	q	1
NM_009425.2	Tnfsf10	83.4383	0.339163	0.192858	1.75861	0.0786435	0.226362	0.645197	NM_009425	22035	tumor necrosis factor (ligand) superfamily, member 10 [Source:MGI Symbol;Acc:MGI:107414]	22035	3	27371177	27396576	q	1
NM_021284.6	Kras	1979.84	-0.138108	0.0821097	-1.682	0.0925693	0.228178	0.641726	NM_021284	16653	Kirsten rat sarcoma viral oncogene homolog [Source:MGI Symbol;Acc:MGI:96680]	16653	6	145162425	145195965	q	-1
NM_178114.4	Amigo2	459.537	-0.364124	0.208446	-1.74686	0.0806624	0.230421	0.637479	NM_178114	105827	adhesion molecule with Ig like domain 2 [Source:MGI Symbol;Acc:MGI:2145995]	105827	15	97142006	97145168	q	-1
NM_001131054.1	Pttg1	3452.68	-0.175358	0.100343	-1.74759	0.0805357	0.230421	0.637479	NM_001131054	30939	pituitary tumor-transforming gene 1 [Source:MGI Symbol;Acc:MGI:1353578]	30939	11	43311077	43317078	q	-1
NM_010386.3	H2-DMa	523.165	0.298828	0.178377	1.67526	0.0938833	0.230566	0.637204	NM_010386	14998	histocompatibility 2, class II, locus DMa [Source:MGI Symbol;Acc:MGI:95921]	14998	17	34338515	34358075	q	1
NM_007456.4	Ap1m1	2073.6	-0.113549	0.0682531	-1.66365	0.0961825	0.233636	0.63146	NM_007456	11767	adaptor-related protein complex AP-1, mu subunit 1 [Source:MGI Symbol;Acc:MGI:102776]	11767	8	72993862	73011229	q	1
NM_010234.2	Fos	396.707	-0.85701	0.514776	-1.66482	0.095948	0.233636	0.63146	NM_010234	14281	FBJ osteosarcoma oncogene [Source:MGI Symbol;Acc:MGI:95574]	14281	12	85520664	85524047	q	1
NM_213659.2	Stat3	1563.97	0.0974226	0.0585096	1.66507	0.0958988	0.233636	0.63146	NM_213659	20848	signal transducer and activator of transcription 3 [Source:MGI Symbol;Acc:MGI:103038]	20848	11	100775924	100830366	q	-1
NM_010329.2	Pdpn	633.529	0.231294	0.133095	1.73781	0.0822445	0.234057	0.630679	NM_010329	14726	podoplanin [Source:MGI Symbol;Acc:MGI:103098]	14726	4	142994001	143026134	q	-1
NM_025609.2	Tab1	1254.81	-0.100169	0.0603298	-1.66036	0.0968429	0.234388	0.630065	NM_025609	66513	TGF-beta activated kinase 1/MAP3K7 binding protein 1 [Source:MGI Symbol;Acc:MGI:1913763]	66513	15	80017328	80045908	q	1
NM_008039.2	Fpr2	37.527	0.443848	0.267998	1.65616	0.0976891	0.235582	0.627857	NM_008039	14289	formyl peptide receptor 2 [Source:MGI Symbol;Acc:MGI:1278319]	14289	17	18108086	18114214	q	1
NM_007545.2	Hrk	424.791	0.531944	0.307393	1.7305	0.0835404	0.236854	0.625519	NM_007545	12123	harakiri, BCL2 interacting protein (contains only BH3 domain) [Source:MGI Symbol;Acc:MGI:1201608]	12123	5	118302713	118327543	q	1
NM_001304721.1	Entpd1	555.234	0.219585	0.133015	1.65082	0.0987746	0.237343	0.624623	NM_001304721	12495	ectonucleoside triphosphate diphosphohydrolase 1 [Source:MGI Symbol;Acc:MGI:102805]	12495	19	40600810	40730046	q	1
NM_001128605.1	Psen2	473.628	-0.166377	0.096385	-1.72618	0.0843158	0.238161	0.62313	NM_001128605	19165	presenilin 2 [Source:MGI Symbol;Acc:MGI:109284]	19165	1	180054569	180091003	q	-1
NM_001025432.1	Crebbp	6063.03	-0.129608	0.0795544	-1.62917	0.103277	0.247273	0.606824	NM_001025432	12914	CREB binding protein [Source:MGI Symbol;Acc:MGI:1098280]	12914	16	3899192	4031861	q	-1
NM_019710.2	Smc1a	1558.91	-0.0781846	0.0459296	-1.70227	0.0887046	0.248702	0.604322	NM_019710	24061	structural maintenance of chromosomes 1A [Source:MGI Symbol;Acc:MGI:1344345]	24061	X	150799424	150845690	q	1
NM_009688.2	Xiap	4311.02	-0.141591	0.083163	-1.70257	0.0886493	0.248702	0.604322	NM_009688	11798	X-linked inhibitor of apoptosis [Source:MGI Symbol;Acc:MGI:107572]	11798	X	41148556	41198533	q	1
NM_016896.3	Map3k14	109.375	-0.283052	0.16731	-1.69178	0.0906873	0.252391	0.597927	NM_016896	53859	mitogen-activated protein kinase kinase kinase 14 [Source:MGI Symbol;Acc:MGI:1858204]	53859	11	103110588	103158298	q	-1
NM_028749.1	Npl	349.699	0.219015	0.129334	1.69341	0.0903778	0.252391	0.597927	NM_028749	74091	N-acetylneuraminate pyruvate lyase [Source:MGI Symbol;Acc:MGI:1921341]	74091	1	153378761	153425791	q	-1
NM_008400.2	Itgal	25.1942	0.369253	0.228504	1.61596	0.106103	0.253131	0.596655	NM_008400	16408	integrin alpha L [Source:MGI Symbol;Acc:MGI:96606]	16408	7	126895432	126934310	q	1
NM_010177.3	Fasl	29.7805	-0.34414	0.213284	-1.61352	0.106631	0.253485	0.596048	NM_010177	14103	Fas ligand [Source:MGI Symbol;Acc:MGI:99255]	14103	1	161608258	161616064	q	-1
NM_030743.5	Rnf114	2621.07	-0.114257	0.071028	-1.60861	0.107701	0.255122	0.593252	NM_030743	81018	ring finger protein 114 [Source:MGI Symbol;Acc:MGI:1933159]	81018	2	167334565	167358093	q	1
NM_011514.2	Suv39h1	770.865	-0.251409	0.149861	-1.67761	0.0934225	0.259051	0.586615	NM_011514	20937	suppressor of variegation 3-9 1 [Source:MGI Symbol;Acc:MGI:1099440]	20937	X	7927410	7940999	q	-1
NM_172729.2	Nod1	179.281	0.178231	0.111502	1.59846	0.10994	0.259505	0.585854	NM_172729	107607	nucleotide-binding oligomerization domain containing 1 [Source:MGI Symbol;Acc:MGI:1341839]	107607	6	54900934	54949597	q	-1
NM_134471.3	Kif2c	30.9579	0.553146	0.330363	1.67436	0.0940598	0.259866	0.585251	NM_134471	73804	kinesin family member 2C [Source:MGI Symbol;Acc:MGI:1921054]	73804	4	117016836	117039836	q	-1
NM_139200.4	Cytip	25.2952	0.366841	0.219499	1.67126	0.0946699	0.260091	0.584875	NM_139200	227929	cytohesin 1 interacting protein [Source:MGI Symbol;Acc:MGI:2183535]	227929	2	58019149	58085544	q	-1
NM_198862.2	Nlgn2	6523.91	-0.173875	0.104088	-1.67046	0.0948283	0.260091	0.584875	NM_198862	216856	neuroligin 2 [Source:MGI Symbol;Acc:MGI:2681835]	216856	11	69713948	69728610	q	-1
NM_008360.1	Il18	1879.63	0.0898719	0.0567051	1.5849	0.112989	0.264826	0.57704	NM_008360	16173	interleukin 18 [Source:MGI Symbol;Acc:MGI:107936]	16173	9	50466127	50493140	q	1
NM_008372.3	Il7r	28.6	0.34844	0.220091	1.58317	0.113384	0.264826	0.57704	NM_008372	16197	interleukin 7 receptor [Source:MGI Symbol;Acc:MGI:96562]	16197	15	9505874	9530262	q	-1
NM_029094.3	Pik3cb	1565.93	-0.100628	0.0634801	-1.5852	0.112922	0.264826	0.57704	NM_029094	74769	phosphatidylinositol-4,5-bisphosphate 3-kinase catalytic subunit beta [Source:MGI Symbol;Acc:MGI:1922019]	74769	9	98918707	99022674	q	-1
NM_009689.2	Birc5	38.6229	0.376103	0.226781	1.65844	0.0972282	0.265628	0.575727	NM_009689	11799	baculoviral IAP repeat-containing 5 [Source:MGI Symbol;Acc:MGI:1203517]	11799	11	117740077	117746569	q	1
NM_053269.3	Rad51c	84.7764	-0.346715	0.209261	-1.65685	0.0975488	0.265628	0.575727	NM_053269	114714	RAD51 paralog C [Source:MGI Symbol;Acc:MGI:2150020]	114714	11	87267471	87295780	q	-1
NM_001190333.1	Ccr6	54.1142	0.663976	0.420459	1.57917	0.114298	0.266031	0.575068	NM_001190333	12458	C-C motif chemokine receptor 6 [Source:MGI Symbol;Acc:MGI:1333797]	12458	17	8454875	8475973	q	1
NM_010581.3	Cd47	8261.09	-0.102112	0.0618079	-1.65208	0.0985187	0.267307	0.57299	NM_010581	16423	CD47 antigen (Rh-related antigen, integrin-associated signal transducer) [Source:MGI Symbol;Acc:MGI:96617]	16423	16	49620896	49735373	q	1
NM_008492.2	Ldhb	29325	-0.187194	0.120164	-1.55783	0.119274	0.275692	0.559576	NM_008492	16832	lactate dehydrogenase B [Source:MGI Symbol;Acc:MGI:96763]	16832	6	142435975	142453683	q	-1
NM_011945.2	Map3k1	406.326	-0.133835	0.0858355	-1.55921	0.118948	0.275692	0.559576	NM_011945	26401	mitogen-activated protein kinase kinase kinase 1 [Source:MGI Symbol;Acc:MGI:1346872]	26401	13	111882962	111945527	q	-1
NM_207625.2	Acsl4	3529.46	-0.243556	0.156699	-1.55429	0.120115	0.276679	0.558024	NM_207625	50790	acyl-CoA synthetase long-chain family member 4 [Source:MGI Symbol;Acc:MGI:1354713]	50790	X	141100989	141173531	q	-1
NM_172053.2	Adamts16	161.126	-0.265613	0.162997	-1.62956	0.103194	0.278111	0.555782	NM_172053	271127	ADAM metallopeptidase with thrombospondin type 1 motif 16 [Source:MGI Symbol;Acc:MGI:2429637]	271127	13	70875921	70989930	q	-1
NM_011232.2	Rad1	547.581	-0.140094	0.0859807	-1.62937	0.103235	0.278111	0.555782	NM_011232	19355	RAD1 checkpoint DNA exonuclease [Source:MGI Symbol;Acc:MGI:1316678]	19355	15	10486104	10499149	q	1
NM_019494.1	Cxcl11	26.9317	0.449918	0.291448	1.54373	0.122653	0.281555	0.550437	NM_019494	NA	NA	NA	NA	NA	NA	NA	NA
NM_013654.3	Ccl7	38.912	0.366859	0.238132	1.54057	0.123422	0.282349	0.549213	NM_013654	20306	C-C motif chemokine ligand 7 [Source:MGI Symbol;Acc:MGI:99512]	20306	11	81936538	81938351	q	1
NM_010382.2	H2-Eb1	56.7501	0.490291	0.319358	1.53524	0.124725	0.283076	0.548097	NM_010382	14969	histocompatibility 2, class II antigen E beta [Source:MGI Symbol;Acc:MGI:95901]	14969	17	34524841	34535648	q	1
NM_008517.2	Lta4h	1813.99	-0.115371	0.0751679	-1.53484	0.124824	0.283076	0.548097	NM_008517	16993	leukotriene A4 hydrolase [Source:MGI Symbol;Acc:MGI:96836]	16993	10	93289273	93320737	q	1
NM_009316.1	Map3k7	1092.24	-0.103144	0.0672356	-1.53408	0.125011	0.283076	0.548097	NM_009316	26409	mitogen-activated protein kinase kinase kinase 7 [Source:MGI Symbol;Acc:MGI:1346877]	26409	4	31964097	32023467	q	1
NM_009776.3	Serping1	152.293	0.537365	0.333543	1.61108	0.107162	0.286648	0.542651	NM_009776	12258	serine (or cysteine) peptidase inhibitor, clade G, member 1 [Source:MGI Symbol;Acc:MGI:894696]	12258	2	84595731	84605788	q	-1
NM_008655.1	Gadd45b	354.708	0.234083	0.154028	1.51974	0.128577	0.290166	0.537353	NM_008655	17873	growth arrest and DNA-damage-inducible 45 beta [Source:MGI Symbol;Acc:MGI:107776]	17873	10	80765907	80768038	q	1
NM_181848.4	Optn	888.077	-0.215172	0.134463	-1.60024	0.109546	0.291995	0.534625	NM_181848	71648	optineurin [Source:MGI Symbol;Acc:MGI:1918898]	71648	2	5025453	5068862	q	-1
NM_010081.2	Dst	3593.47	-0.129437	0.0812113	-1.59383	0.110974	0.292967	0.533182	NM_010081	13518	dystonin [Source:MGI Symbol;Acc:MGI:104627]	13518	1	33947306	34347742	q	1
NM_008316.2	Hus1	579.422	-0.135345	0.0850874	-1.59066	0.111687	0.292967	0.533182	NM_008316	15574	HUS1 checkpoint clamp component [Source:MGI Symbol;Acc:MGI:1277962]	15574	11	8943137	8961191	q	-1
NM_001144855.1	Ppfia4	1114.1	-0.183529	0.115194	-1.59322	0.111111	0.292967	0.533182	NM_001144855	68507	protein tyrosine phosphatase, receptor type, f polypeptide (PTPRF), interacting protein (liprin), alpha 4 [Source:MGI Symbol;Acc:MGI:1915757]	68507	1	134224521	134260666	q	-1
NM_175130.4	Trpm4	107.537	-0.199644	0.125566	-1.58995	0.111846	0.292967	0.533182	NM_175130	68667	transient receptor potential cation channel, subfamily M, member 4 [Source:MGI Symbol;Acc:MGI:1915917]	68667	7	44952056	44983204	q	-1
NM_011515.4	Vamp7	2839.66	-0.21365	0.134811	-1.58481	0.11301	0.294995	0.530185	NM_011515	NA	NA	NA	NA	NA	NA	NA	NA
NM_008501.2	Lif	60.3572	0.321717	0.213167	1.50922	0.131242	0.295183	0.529908	NM_008501	16878	leukemia inhibitory factor [Source:MGI Symbol;Acc:MGI:96787]	16878	11	4207557	4222514	q	1
NM_009046.2	Relb	84.3398	0.215129	0.142791	1.5066	0.131913	0.295698	0.529151	NM_009046	19698	avian reticuloendotheliosis viral (v-rel) oncogene related B [Source:MGI Symbol;Acc:MGI:103289]	19698	7	19340142	19363363	q	-1
NM_029270.2	Arhgap24	457.456	-0.342087	0.21657	-1.57957	0.114206	0.296074	0.528599	NM_029270	231532	Rho GTPase activating protein 24 [Source:MGI Symbol;Acc:MGI:1922647]	231532	5	102629257	103045803	q	1
NM_010910.1	Nefl	3325.44	-0.282146	0.178551	-1.5802	0.114061	0.296074	0.528599	NM_010910	18039	neurofilament, light polypeptide [Source:MGI Symbol;Acc:MGI:97313]	18039	14	68321312	68326544	q	1
NM_025589.4	Rpl36al	3177.54	-0.138063	0.0876632	-1.57493	0.115273	0.297821	0.526044	NM_025589	66483	ribosomal protein L36A-like [Source:MGI Symbol;Acc:MGI:1913733]	66483	12	69229505	69230857	q	-1
NM_011046.2	Furin	1108.91	-0.1052	0.0702195	-1.49816	0.134091	0.299575	0.523495	NM_011046	18550	furin, paired basic amino acid cleaving enzyme [Source:MGI Symbol;Acc:MGI:97513]	18550	7	80038333	80055184	q	-1
NM_027439.4	Atp6ap2	14062.5	-0.261266	0.17463	-1.49611	0.134626	0.299698	0.523316	NM_027439	70495	ATPase, H+ transporting, lysosomal accessory protein 2 [Source:MGI Symbol;Acc:MGI:1917745]	70495	X	12454040	12483288	q	1
NM_008907.1	Ppia	20517.9	-0.153941	0.103005	-1.49451	0.135043	0.299698	0.523316	NM_008907	268373	peptidylprolyl isomerase A [Source:MGI Symbol;Acc:MGI:97749]	268373	11	6365443	6369817	q	1
NM_021443.2	Ccl8	25.6482	0.408925	0.274875	1.48768	0.136836	0.302671	0.519029	NM_021443	20307	C-C motif chemokine ligand 8 [Source:MGI Symbol;Acc:MGI:101878]	20307	11	82006011	82007625	q	1
NM_008684.2	Neo1	2376.36	-0.0932711	0.0627717	-1.48588	0.137311	0.302719	0.51896	NM_008684	18007	neogenin [Source:MGI Symbol;Acc:MGI:1097159]	18007	9	58781970	58943724	q	-1
NM_008580.4	Map3k5	740.347	-0.257225	0.174943	-1.47034	0.14147	0.310861	0.507434	NM_008580	26408	mitogen-activated protein kinase kinase kinase 5 [Source:MGI Symbol;Acc:MGI:1346876]	26408	10	19810218	20018499	q	1
NM_010375.2	Gzmg	28.3275	-0.336591	0.229254	-1.4682	0.14205	0.311112	0.507083	NM_010375	14944	granzyme G [Source:MGI Symbol;Acc:MGI:109253]	14944	14	56394039	56397036	q	-1
NM_010549.3	Il11ra1/2	406.706	-0.115526	0.0788245	-1.46561	0.142755	0.311636	0.506353	NM_010549	16157	interleukin 11 receptor subunit alpha 1 [Source:MGI Symbol;Acc:MGI:107426]	16157	4	41699989	41769474	q	1
NM_053180.2	Cdk20	274.826	-0.198312	0.128085	-1.54829	0.121553	0.312979	0.504485	NM_053180	105278	cyclin dependent kinase 20 [Source:MGI Symbol;Acc:MGI:2145349]	105278	13	64580128	64589587	q	1
NM_016746.4	Ccnc	1655.95	-0.121465	0.0831279	-1.46119	0.143964	0.313251	0.504108	NM_016746	51813	cyclin C [Source:MGI Symbol;Acc:MGI:1858199]	51813	4	21727701	21759922	q	1
NM_027571.3	P2ry12	969.56	0.178814	0.116737	1.53177	0.125578	0.320791	0.493778	NM_027571	70839	purinergic receptor P2Y, G-protein coupled 12 [Source:MGI Symbol;Acc:MGI:1918089]	70839	3	59123693	59170292	q	-1
NM_011340.3	Serpinf1	1034.66	-0.236784	0.154411	-1.53347	0.12516	0.320791	0.493778	NM_011340	20317	serine (or cysteine) peptidase inhibitor, clade F, member 1 [Source:MGI Symbol;Acc:MGI:108080]	20317	11	75300595	75313527	q	-1
NM_013881.4	Ulk2	1345.34	-0.0852531	0.0590467	-1.44382	0.148788	0.322697	0.491205	NM_013881	29869	unc-51 like kinase 2 [Source:MGI Symbol;Acc:MGI:1352758]	29869	11	61666475	61745899	q	-1
NM_001017959.1	Lamp2	6182.54	0.100588	0.0697925	1.44124	0.149518	0.323229	0.490489	NM_001017959	16784	lysosomal-associated membrane protein 2 [Source:MGI Symbol;Acc:MGI:96748]	16784	X	37490234	37545331	q	-1
NM_010513.2	Igf1r	1082.12	-0.151289	0.0992566	-1.52422	0.127454	0.323769	0.489765	NM_010513	16001	insulin-like growth factor I receptor [Source:MGI Symbol;Acc:MGI:96433]	16001	7	67602575	67883416	q	1
NM_007465.2	Birc2	1409.58	-0.131137	0.0863887	-1.51799	0.129017	0.326641	0.48593	NM_007465	11797	baculoviral IAP repeat-containing 2 [Source:MGI Symbol;Acc:MGI:1197009]	11797	9	7818228	7837065	q	-1
NM_177708.4	Rtn4rl1	1304.36	-0.325411	0.215905	-1.5072	0.13176	0.332475	0.478242	NM_177708	237847	reticulon 4 receptor-like 1 [Source:MGI Symbol;Acc:MGI:2661375]	237847	11	75084609	75158595	q	1
NM_013464.4	Ahr	169.787	-0.147057	0.10339	-1.42235	0.154924	0.332763	0.477865	NM_013464	11622	aryl-hydrocarbon receptor [Source:MGI Symbol;Acc:MGI:105043]	11622	12	35547973	35585037	q	-1
XM_006524705.3	Plin4	111.935	-0.31403	0.220571	-1.42371	0.15453	0.332763	0.477865	XM_006524705	NA	NA	NA	NA	NA	NA	NA	NA
NM_011640.1	Trp53	264.665	-0.127171	0.0845792	-1.50357	0.132692	0.333714	0.476626	NM_011640	22059	transformation related protein 53 [Source:MGI Symbol;Acc:MGI:98834]	22059	11	69471185	69482699	q	1
NM_008486.2	Anpep	101.708	0.243623	0.173312	1.40569	0.159816	0.342169	0.465759	NM_008486	16790	alanyl aminopeptidase, membrane [Source:MGI Symbol;Acc:MGI:5000466]	16790	7	79471551	79510807	q	-1
NM_010189.3	Fcgrt	369.174	0.176719	0.126353	1.39861	0.161929	0.345587	0.461443	NM_010189	14132	Fc fragment of IgG receptor and transporter [Source:MGI Symbol;Acc:MGI:103017]	14132	7	44742414	44753275	q	-1
NM_001113563.1	Stat5b	514.031	-0.207487	0.148707	-1.39527	0.162934	0.346624	0.460142	NM_001113563	20851	signal transducer and activator of transcription 5B [Source:MGI Symbol;Acc:MGI:103035]	20851	11	100671557	100741550	q	-1
NM_008960.2	Pten	5125.3	-0.0893011	0.060289	-1.48122	0.138549	0.34729	0.459307	NM_008960	19211	phosphatase and tensin homolog [Source:MGI Symbol;Acc:MGI:109583]	19211	19	32734897	32803560	q	1
NM_024198.3	Gpx7	190.714	0.17691	0.127226	1.39052	0.164371	0.34857	0.45771	NM_024198	67305	glutathione peroxidase 7 [Source:MGI Symbol;Acc:MGI:1914555]	67305	4	108257587	108264158	q	-1
NM_001177849.1	Asph	4954.61	-0.0830039	0.0563659	-1.47259	0.140862	0.350764	0.454985	NM_001177849	65973	aspartate-beta-hydroxylase [Source:MGI Symbol;Acc:MGI:1914186]	65973	4	9448069	9669344	q	-1
NM_001013365.2	Osm	25.0373	0.35517	0.256881	1.38262	0.166781	0.352562	0.452764	NM_001013365	18413	oncostatin M [Source:MGI Symbol;Acc:MGI:104749]	18413	11	4186420	4191026	q	1
NM_008339.2	Cd79b	24.9268	0.300353	0.218566	1.3742	0.16938	0.356927	0.447421	NM_008339	15985	CD79B antigen [Source:MGI Symbol;Acc:MGI:96431]	15985	11	106202167	106205588	q	-1
NM_175494.4	Zfp367	1005.43	-0.208169	0.142503	-1.4608	0.144069	0.357576	0.446632	NM_175494	238673	zinc finger protein 367 [Source:MGI Symbol;Acc:MGI:2442266]	238673	13	64280832	64301016	q	-1
NM_009883.4	Cebpb	413.134	0.137611	0.10047	1.36967	0.170789	0.358674	0.4453	NM_009883	12608	CCAAT/enhancer binding protein beta [Source:MGI Symbol;Acc:MGI:88373]	12608	2	167530835	167532338	q	1
NM_001271599.1	Sort1	7511.32	-0.136466	0.099749	-1.36809	0.171283	0.358674	0.4453	NM_001271599	20661	sortilin 1 [Source:MGI Symbol;Acc:MGI:1338015]	20661	3	108191398	108268827	q	1
NM_009826.4	Rb1cc1	3300.75	-0.0779522	0.0572318	-1.36204	0.173185	0.360397	0.443219	NM_009826	12421	RB1-inducible coiled-coil 1 [Source:MGI Symbol;Acc:MGI:1341850]	12421	1	6276421	6346872	q	1
NM_001079830.2	Trim33	464.534	-0.166541	0.122207	-1.36279	0.17295	0.360397	0.443219	NM_001079830	94093	tripartite motif-containing 33 [Source:MGI Symbol;Acc:MGI:2137357]	94093	3	103186609	103266091	q	1
NM_009424.2	Traf6	829.662	-0.0972953	0.0716425	-1.35807	0.174443	0.361887	0.441427	NM_009424	22034	TNF receptor-associated factor 6 [Source:MGI Symbol;Acc:MGI:108072]	22034	2	101508774	101532014	q	1
NM_009451.3	Tubb4a	11287.2	-0.20519	0.141447	-1.45065	0.146879	0.363356	0.439667	NM_009451	22153	tubulin, beta 4A class IVA [Source:MGI Symbol;Acc:MGI:107848]	22153	17	57387066	57394782	q	-1
NM_018790.2	Arc	1178.02	-0.508649	0.352242	-1.44403	0.148729	0.366737	0.435646	NM_018790	11838	activity regulated cytoskeletal-associated protein [Source:MGI Symbol;Acc:MGI:88067]	11838	15	74540932	74544419	q	-1
NM_009851.2	Cd44	34.3402	0.354693	0.247927	1.43063	0.152536	0.371574	0.429955	NM_009851	12505	CD44 antigen [Source:MGI Symbol;Acc:MGI:88338]	12505	2	102641486	102732010	q	-1
NM_023516.5	Hilpda	134.581	-0.174753	0.122152	-1.43062	0.152538	0.371574	0.429955	NM_023516	69573	hypoxia inducible lipid droplet associated [Source:MGI Symbol;Acc:MGI:1916823]	69573	6	29272487	29275445	q	1
NM_001136222.1	Acsl3	10830.5	-0.126371	0.0943403	-1.33953	0.180399	0.371934	0.429535	NM_001136222	74205	acyl-CoA synthetase long-chain family member 3 [Source:MGI Symbol;Acc:MGI:1921455]	74205	1	78635542	78685460	q	1
NM_008859.2	Prkcq	471.169	-0.156612	0.116895	-1.33976	0.180323	0.371934	0.429535	NM_008859	18761	protein kinase C, theta [Source:MGI Symbol;Acc:MGI:97601]	18761	2	11176919	11306033	q	1
NM_023844.4	Jam2	2242.5	-0.186076	0.130814	-1.42245	0.154896	0.375822	0.425018	NM_023844	67374	junction adhesion molecule 2 [Source:MGI Symbol;Acc:MGI:1933820]	67374	16	84571011	84622816	q	1
NM_013819.2	H2-M3	120.043	0.230442	0.173049	1.33166	0.182972	0.376078	0.424722	NM_013819	14991	histocompatibility 2, M region locus 3 [Source:MGI Symbol;Acc:MGI:95915]	14991	17	37581111	37585375	q	1
NM_010248.2	Gab2	569.343	-0.121487	0.0915597	-1.32686	0.184554	0.378167	0.422317	NM_010248	14389	growth factor receptor bound protein 2-associated protein 2 [Source:MGI Symbol;Acc:MGI:1333854]	14389	7	96730793	96958153	q	1
NM_001085515.2	AI464131	622.297	-0.14311	0.101085	-1.41574	0.156852	0.379351	0.420959	NM_001085515	329828	myogenesis regulating glycosidase (putative) [Source:MGI Symbol;Acc:MGI:2140300]	329828	4	41495604	41503076	q	-1
NM_026402.3	Atg3	3002.08	-0.0773737	0.0586492	-1.31926	0.187082	0.382173	0.41774	NM_026402	67841	autophagy related 3 [Source:MGI Symbol;Acc:MGI:1915091]	67841	16	44979148	45008901	q	1
NM_176940.5	Nwd1	1054.17	-0.150539	0.106815	-1.40935	0.158731	0.382349	0.41754	NM_176940	319555	NACHT and WD repeat domain containing 1 [Source:MGI Symbol;Acc:MGI:2442268]	319555	8	73373339	73444504	q	1
NM_001081340.2	Setd2	3358.57	-0.12315	0.0874585	-1.4081	0.159102	0.382349	0.41754	NM_001081340	235626	SET domain containing 2 [Source:MGI Symbol;Acc:MGI:1918177]	235626	9	110358262	110447701	q	1
NM_001305844.1	Apoe	25755.5	0.102293	0.0727797	1.40551	0.159869	0.382978	0.416826	NM_001305844	11816	apolipoprotein E [Source:MGI Symbol;Acc:MGI:88057]	11816	7	19430034	19433113	q	-1
NM_001195633.1	Epg5	1200.78	-0.0974563	0.0696098	-1.40004	0.161502	0.385669	0.413785	NM_001195633	100502841	ectopic P-granules 5 autophagy tethering factor [Source:MGI Symbol;Acc:MGI:1918673]	100502841	18	77981680	78078228	q	1
NM_009744.3	Bcl6	388.806	-0.142353	0.109186	-1.30377	0.192312	0.389516	0.409475	NM_009744	12053	B cell leukemia/lymphoma 6 [Source:MGI Symbol;Acc:MGI:107187]	12053	16	23783802	23807602	q	-1
NM_007539.2	Bdkrb1	43.3329	0.274922	0.211198	1.30173	0.193008	0.389516	0.409475	NM_007539	12061	bradykinin receptor, beta 1 [Source:MGI Symbol;Acc:MGI:88144]	12061	12	105569344	105571687	q	1
NM_011617.1	Cd70	31.6256	0.285197	0.218314	1.30636	0.19143	0.389516	0.409475	NM_011617	21948	CD70 antigen [Source:MGI Symbol;Acc:MGI:1195273]	21948	17	57452997	57456777	q	-1
NM_023699.3	Nfatc4	43.9016	0.277528	0.213086	1.30242	0.192772	0.389516	0.409475	NM_023699	73181	nuclear factor of activated T cells, cytoplasmic, calcineurin dependent 4 [Source:MGI Symbol;Acc:MGI:1920431]	73181	14	56060601	56071400	q	1
NM_008391.2	Irf2	828.098	-0.0989898	0.071684	-1.38092	0.167304	0.395778	0.402548	NM_008391	16363	interferon regulatory factor 2 [Source:MGI Symbol;Acc:MGI:96591]	16363	8	47192767	47300493	q	1
NM_011035.2	Pak1	9731.04	-0.215489	0.167313	-1.28794	0.197768	0.397918	0.400206	NM_011035	18479	p21 (RAC1) activated kinase 1 [Source:MGI Symbol;Acc:MGI:1339975]	18479	7	97437748	97561588	q	1
NM_027406.1	Aldh1l1	1458.22	0.10037	0.0731541	1.37203	0.170054	0.399786	0.398173	NM_027406	107747	aldehyde dehydrogenase 1 family, member L1 [Source:MGI Symbol;Acc:MGI:1340024]	107747	6	90463409	90577185	q	1
NM_021351.1	Cryba4	55.5871	0.240291	0.175407	1.3699	0.170718	0.400103	0.397828	NM_021351	12959	crystallin, beta A4 [Source:MGI Symbol;Acc:MGI:102716]	12959	5	112394359	112400384	q	-1
NM_001042527.2	Blm	228.509	-0.121617	0.0898973	-1.35284	0.176106	0.408933	0.388347	NM_001042527	12144	Bloom syndrome, RecQ like helicase [Source:MGI Symbol;Acc:MGI:1328362]	12144	7	80104481	80184867	q	-1
NM_007808.4	Cycs	127.245	-0.165123	0.121967	-1.35383	0.17579	0.408933	0.388347	NM_007808	13063	cytochrome c, somatic [Source:MGI Symbol;Acc:MGI:88578]	13063	6	50539543	50543518	q	-1
NM_009368.3	Tgfb3	501.4	-0.127913	0.100878	-1.268	0.204797	0.410824	0.386344	NM_009368	21809	transforming growth factor, beta 3 [Source:MGI Symbol;Acc:MGI:98727]	21809	12	86103519	86125815	q	-1
NM_001160353.1	Grm2	414.798	-0.872556	0.649474	-1.34348	0.179116	0.413826	0.383182	NM_001160353	108068	glutamate receptor, metabotropic 2 [Source:MGI Symbol;Acc:MGI:1351339]	108068	9	106520294	106533281	q	-1
NM_011424.2	Ncor2	1982.35	-0.129094	0.096131	-1.34289	0.179307	0.413826	0.383182	NM_011424	20602	nuclear receptor co-repressor 2 [Source:MGI Symbol;Acc:MGI:1337080]	20602	5	125094217	125256283	q	-1
NM_197986.2	Tmem140	25.0964	0.272244	0.215794	1.26159	0.207096	0.414192	0.382798	NM_197986	68487	transmembrane protein 140 [Source:MGI Symbol;Acc:MGI:1915737]	68487	6	34840081	34851881	q	1
NM_172051.2	Tmcc3	2140.3	-0.150471	0.113	-1.33161	0.18299	0.419767	0.376991	NM_172051	319880	transmembrane and coiled coil domains 3 [Source:MGI Symbol;Acc:MGI:2442900]	319880	10	94147811	94426818	q	1
NM_207225.1	Hdac4	441.589	-0.142353	0.107198	-1.32795	0.184196	0.421257	0.375452	NM_207225	208727	histone deacetylase 4 [Source:MGI Symbol;Acc:MGI:3036234]	208727	1	91856501	92123421	q	-1
NM_011104.2	Prkce	6904.38	-0.126367	0.0955431	-1.32262	0.185963	0.424017	0.372617	NM_011104	18754	protein kinase C, epsilon [Source:MGI Symbol;Acc:MGI:97599]	18754	17	86475213	86965347	q	1
NM_153459.4	Dusp7	2303.62	-0.120442	0.0914456	-1.31708	0.18781	0.426944	0.369629	NM_153459	235584	dual specificity phosphatase 7 [Source:MGI Symbol;Acc:MGI:2387100]	235584	9	106245831	106252923	q	1
NM_001271614.1	Fen1	367.786	-0.09441	0.0719531	-1.3121	0.189485	0.428179	0.368374	NM_001271614	14156	flap structure specific endonuclease 1 [Source:MGI Symbol;Acc:MGI:102779]	14156	19	10176496	10181533	q	-1
NM_053081.2	Fancg	338.658	-0.110532	0.08452	-1.30776	0.190956	0.43022	0.36631	NM_053081	60534	Fanconi anemia, complementation group G [Source:MGI Symbol;Acc:MGI:1926471]	60534	4	43002343	43010506	q	-1
NM_009740.1	Bcl10	1108.62	-0.071393	0.0548956	-1.30052	0.193422	0.433036	0.363476	NM_009740	12042	B cell leukemia/lymphoma 10 [Source:MGI Symbol;Acc:MGI:1337994]	12042	3	145628559	145640111	q	1
NM_175103.3	Bola2	3543.39	-0.0978367	0.0753003	-1.29929	0.193845	0.433036	0.363476	NM_175103	66162	bolA family member 2 [Source:MGI Symbol;Acc:MGI:1913412]	66162	7	126294573	126298970	q	1
NM_007825.4	Cyp7b1	536.814	0.0894791	0.0688798	1.29906	0.193922	0.433036	0.363476	NM_007825	13123	cytochrome P450, family 7, subfamily b, polypeptide 1 [Source:MGI Symbol;Acc:MGI:104978]	13123	3	18126114	18297502	q	-1
NM_007544.3	Bid	262.798	-0.183829	0.142497	-1.29006	0.19703	0.434204	0.362306	NM_007544	12122	BH3 interacting domain death agonist [Source:MGI Symbol;Acc:MGI:108093]	12122	6	120868891	120893814	q	-1
NM_001113573.1	Brd3	1090.02	-0.141393	0.110615	-1.27824	0.201164	0.434204	0.362306	NM_001113573	67382	bromodomain containing 3 [Source:MGI Symbol;Acc:MGI:1914632]	67382	2	27335591	27397674	q	-1
NM_007984.2	Fscn1	5922.79	-0.139673	0.108383	-1.2887	0.197504	0.434204	0.362306	NM_007984	14086	fascin actin-bundling protein 1 [Source:MGI Symbol;Acc:MGI:1352745]	14086	5	142946098	142958940	q	1
NM_010413.3	Hdac6	618.676	-0.136004	0.105991	-1.28316	0.199437	0.434204	0.362306	NM_010413	15185	histone deacetylase 6 [Source:MGI Symbol;Acc:MGI:1333752]	15185	X	7796359	7814128	q	-1
NM_010431.2	Hif1a	5302.52	-0.0819237	0.0642776	-1.27453	0.202476	0.434204	0.362306	NM_010431	15251	hypoxia inducible factor 1, alpha subunit [Source:MGI Symbol;Acc:MGI:106918]	15251	12	73948149	73994304	q	1
NM_008397.3	Itga6	1006.97	0.1504	0.117802	1.27672	0.201703	0.434204	0.362306	NM_008397	16403	integrin alpha 6 [Source:MGI Symbol;Acc:MGI:96605]	16403	2	71575960	71688760	q	1
NM_181074.4	Lingo1	2798.15	-0.332637	0.257694	-1.29082	0.196766	0.434204	0.362306	NM_181074	235402	leucine rich repeat and Ig domain containing 1 [Source:MGI Symbol;Acc:MGI:1915522]	235402	9	56525759	56703752	q	-1
NM_008690.3	Nfkbie	90.5669	0.199276	0.154665	1.28843	0.197595	0.434204	0.362306	NM_008690	18037	nuclear factor of kappa light polypeptide gene enhancer in B cells inhibitor, epsilon [Source:MGI Symbol;Acc:MGI:1194908]	18037	17	45866629	45874095	q	1
NM_001029836.1	Npnt	205.084	0.199248	0.15519	1.2839	0.199178	0.434204	0.362306	NM_001029836	114249	nephronectin [Source:MGI Symbol;Acc:MGI:2148811]	114249	3	132587506	132656052	q	-1
NM_153520.1	Opalin	4720.95	-0.245444	0.192053	-1.278	0.201249	0.434204	0.362306	NM_153520	226115	oligodendrocytic myelin paranodal and inner loop protein [Source:MGI Symbol;Acc:MGI:2657025]	226115	19	41050149	41065552	q	-1
NM_026653.2	Rpa1	1969.05	-0.102716	0.0799925	-1.28408	0.199115	0.434204	0.362306	NM_026653	68275	replication protein A1 [Source:MGI Symbol;Acc:MGI:1915525]	68275	11	75188992	75239150	q	-1
NM_001017426.1	Kdm6b	306.844	-0.173236	0.141656	-1.22293	0.221356	0.44139	0.355178	NM_001017426	216850	KDM1 lysine (K)-specific demethylase 6B [Source:MGI Symbol;Acc:MGI:2448492]	216850	11	69289334	69304501	q	-1
NM_023608.3	Gdpd2	423.167	-0.197088	0.156156	-1.26213	0.206903	0.442446	0.35414	NM_023608	71584	glycerophosphodiester phosphodiesterase domain containing 2 [Source:MGI Symbol;Acc:MGI:1918834]	71584	X	99773479	99782501	q	1
NM_001146311.1	Cln3	501.083	-0.111404	0.0892834	-1.24775	0.212121	0.446387	0.350289	NM_001146311	12752	CLN3 lysosomal/endosomal transmembrane protein, battenin [Source:MGI Symbol;Acc:MGI:107537]	12752	7	126170379	126184989	q	-1
NM_001004357.2	Cntnap2	2249.78	-0.151179	0.120749	-1.25202	0.210564	0.446387	0.350289	NM_001004357	66797	contactin associated protein-like 2 [Source:MGI Symbol;Acc:MGI:1914047]	66797	6	45036291	47281147	q	1
NM_178886.2	Ldlrad3	685.995	-0.133015	0.106059	-1.25416	0.209782	0.446387	0.350289	NM_178886	241576	low density lipoprotein receptor class A domain containing 3 [Source:MGI Symbol;Acc:MGI:2138856]	241576	2	101780548	102016730	q	-1
NM_010786.4	Mdm2	1964.02	-0.101402	0.0811927	-1.2489	0.211701	0.446387	0.350289	NM_010786	17246	transformed mouse 3T3 cell double minute 2 [Source:MGI Symbol;Acc:MGI:96952]	17246	10	117524780	117546663	q	-1
NM_001001183.1	Tmem204	252.672	-0.237064	0.189741	-1.24941	0.211516	0.446387	0.350289	NM_001001183	407831	transmembrane protein 204 [Source:MGI Symbol;Acc:MGI:3039635]	407831	17	25276676	25302565	q	-1
NM_175362.2	Card11	24.5511	0.285795	0.235384	1.21416	0.224685	0.446695	0.349989	NM_175362	108723	caspase recruitment domain family, member 11 [Source:MGI Symbol;Acc:MGI:1916978]	108723	5	140858745	140986337	q	-1
NM_053207.2	Egln1	2481.86	-0.104422	0.0864802	-1.20747	0.227253	0.45046	0.346344	NM_053207	112405	egl-9 family hypoxia-inducible factor 1 [Source:MGI Symbol;Acc:MGI:1932286]	112405	8	125635326	125676063	q	-1
NM_019933.2	Ptpn4	12989.3	-0.378831	0.314422	-1.20485	0.228262	0.451122	0.345706	NM_019933	19258	protein tyrosine phosphatase, non-receptor type 4 [Source:MGI Symbol;Acc:MGI:1099792]	19258	1	119580197	119765343	q	-1
NM_010907.2	Nfkbia	276.716	-0.139463	0.116142	-1.2008	0.22983	0.452881	0.344016	NM_010907	18035	nuclear factor of kappa light polypeptide gene enhancer in B cells inhibitor, alpha [Source:MGI Symbol;Acc:MGI:104741]	18035	12	55536195	55539432	q	-1
NM_203320.3	Cxcl3	21.0875	-0.270517	0.2257	-1.19857	0.230696	0.453251	0.343662	NM_203320	330122	C-X-C motif chemokine ligand 3 [Source:MGI Symbol;Acc:MGI:3037818]	330122	5	90933962	90937459	q	1
NM_019812.2	Sirt1	585.541	-0.139751	0.113031	-1.23639	0.216312	0.453596	0.34333	NM_019812	93759	sirtuin 1 [Source:MGI Symbol;Acc:MGI:2135607]	93759	10	63154784	63217483	q	-1
NM_007761.2	Crcp	296.407	-0.1152	0.0969976	-1.18766	0.234968	0.460288	0.33697	NM_007761	12909	calcitonin gene-related peptide-receptor component protein [Source:MGI Symbol;Acc:MGI:1100818]	12909	5	130058131	130089630	q	1
NM_008361.3	Il1b	23.6481	0.270606	0.229304	1.18012	0.237953	0.464773	0.332759	NM_008361	16176	interleukin 1 beta [Source:MGI Symbol;Acc:MGI:96543]	16176	2	129206490	129213059	q	-1
NM_008536.3	Tm4sf1	866.774	-0.163363	0.134317	-1.21625	0.223889	0.466898	0.330778	NM_008536	17112	transmembrane 4 superfamily member 1 [Source:MGI Symbol;Acc:MGI:104678]	17112	3	57193032	57209409	q	-1
NM_007985.2	Fancc	258.519	-0.109142	0.0901463	-1.21072	0.226005	0.468727	0.32908	NM_007985	14088	Fanconi anemia, complementation group C [Source:MGI Symbol;Acc:MGI:95480]	14088	13	63432857	63645092	q	-1
NM_009687.2	Apex1	772.81	-0.118974	0.101805	-1.16865	0.242546	0.47099	0.326988	NM_009687	11792	apurinic/apyrimidinic endonuclease 1 [Source:MGI Symbol;Acc:MGI:88042]	11792	14	51162425	51164596	q	1
NM_001276398.1	Ms4a7	28.8132	0.282995	0.241944	1.16967	0.242133	0.47099	0.326988	NM_001276398	109225	membrane-spanning 4-domains, subfamily A, member 7 [Source:MGI Symbol;Acc:MGI:1918846]	109225	19	11298403	11313510	q	-1
NM_001004025.4	Ppp3r2	96.4435	-0.292825	0.244151	-1.19936	0.230388	0.474476	0.323785	NM_001004025	19059	protein phosphatase 3, regulatory subunit B, alpha isoform (calcineurin B, type II) [Source:MGI Symbol;Acc:MGI:107171]	19059	4	49678747	49682024	q	-1
NM_011100.3	Prkacb	8562.11	-0.186336	0.155452	-1.19867	0.230657	0.474476	0.323785	NM_011100	18749	protein kinase, cAMP dependent, catalytic, beta [Source:MGI Symbol;Acc:MGI:97594]	18749	3	146435329	146518745	q	-1
NM_080848.2	Wdr5	517.77	-0.125229	0.104291	-1.20076	0.229844	0.474476	0.323785	NM_080848	140858	WD repeat domain 5 [Source:MGI Symbol;Acc:MGI:2155884]	140858	2	27405169	27426547	q	1
NM_009014.3	Rad51b	29.1121	-0.265335	0.222899	-1.19038	0.233897	0.47854	0.320081	NM_009014	19363	RAD51 paralog B [Source:MGI Symbol;Acc:MGI:1099436]	19363	12	79344056	79861464	q	1
NM_007552.4	Bmi1	1081.69	-0.0967887	0.0818548	-1.18244	0.23703	0.480809	0.318028	NM_007552	12151	Bmi1 polycomb ring finger oncogene [Source:MGI Symbol;Acc:MGI:88174]	12151	2	18681829	18691440	q	1
NM_001163522.1	Emcn	398.802	-0.162052	0.137338	-1.17995	0.23802	0.480809	0.318028	NM_001163522	59308	endomucin [Source:MGI Symbol;Acc:MGI:1891716]	59308	3	137046828	137137946	q	1
NM_001163184.1	Plekhb1	30888.4	-0.179391	0.151865	-1.18125	0.237502	0.480809	0.318028	NM_001163184	27276	pleckstrin homology domain containing, family B (evectins) member 1 [Source:MGI Symbol;Acc:MGI:1351469]	27276	7	100292099	100311621	q	-1
NM_011400.3	Slc2a1	891.811	-0.0927019	0.0783441	-1.18327	0.236703	0.480809	0.318028	NM_011400	20525	solute carrier family 2 (facilitated glucose transporter), member 1 [Source:MGI Symbol;Acc:MGI:95755]	20525	4	118965908	118995180	q	1
NM_001113553.1	Irak2	467.916	-0.114719	0.0975431	-1.17609	0.23956	0.482307	0.316677	NM_001113553	108960	interleukin-1 receptor-associated kinase 2 [Source:MGI Symbol;Acc:MGI:2429603]	108960	6	113615428	113671987	q	1
NM_027950.1	Osgin1	34.9889	-0.316025	0.269838	-1.17116	0.241533	0.483678	0.315444	NM_027950	71839	oxidative stress induced growth inhibitor 1 [Source:MGI Symbol;Acc:MGI:1919089]	71839	8	120160863	120172995	q	1
NM_021423.3	Shank3	3365.08	-0.228191	0.1951	-1.16961	0.242158	0.483678	0.315444	NM_021423	58234	SH3 and multiple ankyrin repeat domains 3 [Source:MGI Symbol;Acc:MGI:1930016]	58234	15	89383826	89444464	q	1
NM_001110350.1	Sin3a	1241.04	-0.120178	0.102542	-1.17199	0.241199	0.483678	0.315444	NM_001110350	20466	transcriptional regulator, SIN3A (yeast) [Source:MGI Symbol;Acc:MGI:107157]	20466	9	56979324	57035650	q	1
NM_009915.2	Ccr2	34.0369	0.394091	0.339714	1.16006	0.246023	0.490103	0.309713	NM_009915	12772	C-C motif chemokine receptor 2 [Source:MGI Symbol;Acc:MGI:106185]	12772	9	123901987	123913594	q	1
NM_009663.1	Alox5ap	200.452	0.138489	0.121556	1.1393	0.254579	0.492924	0.30722	NM_009663	11690	arachidonate 5-lipoxygenase activating protein [Source:MGI Symbol;Acc:MGI:107505]	11690	5	149201577	149224963	q	1
NM_010066.3	Dnmt1	354.295	-0.153914	0.133446	-1.15338	0.248754	0.494244	0.306059	NM_010066	13433	DNA methyltransferase 1 [Source:MGI Symbol;Acc:MGI:94912]	13433	9	20818505	20871184	q	-1
NM_007702.2	Cidea	63.6406	-0.360028	0.31332	-1.14908	0.250525	0.496458	0.304117	NM_007702	12683	cell death-inducing DNA fragmentation factor, alpha subunit-like effector A [Source:MGI Symbol;Acc:MGI:1270845]	12683	18	67476674	67500855	q	1
NM_010937.2	Nras	1217.91	0.0759675	0.0673558	1.12785	0.259382	0.500772	0.30036	NM_010937	18176	neuroblastoma ras oncogene [Source:MGI Symbol;Acc:MGI:97376]	18176	3	102965601	102975230	q	1
NM_145830.1	Ehmt2	5318.82	-0.140019	0.123817	-1.13085	0.258118	0.504979	0.296727	NM_145830	110147	euchromatic histone lysine N-methyltransferase 2 [Source:MGI Symbol;Acc:MGI:2148922]	110147	17	35117445	35133028	q	1
NM_001171187.1	Mal	11227.5	-0.176021	0.15563	-1.13102	0.258046	0.504979	0.296727	NM_001171187	17153	myelin and lymphocyte protein, T cell differentiation protein [Source:MGI Symbol;Acc:MGI:892970]	17153	2	127475146	127498615	q	-1
NM_011610.3	Tnfrsf1b	72.2325	0.203023	0.179211	1.13287	0.257268	0.504979	0.296727	NM_011610	21938	tumor necrosis factor receptor superfamily, member 1b [Source:MGI Symbol;Acc:MGI:1314883]	21938	4	144940033	144973440	q	-1
NM_013693.2	Tnf	28.1928	0.280156	0.250355	1.11904	0.263124	0.506533	0.295392	NM_013693	21926	tumor necrosis factor [Source:MGI Symbol;Acc:MGI:104798]	21926	17	35418357	35420983	q	-1
NM_001037726.1	Creb1	1636.24	-0.0816046	0.0730823	-1.11661	0.26416	0.507065	0.294936	NM_001037726	12912	cAMP responsive element binding protein 1 [Source:MGI Symbol;Acc:MGI:88494]	12912	1	64571804	64643707	q	1
NM_007658.3	Cdc25a	336.429	-0.188696	0.168306	-1.12115	0.262226	0.511611	0.291061	NM_007658	12530	cell division cycle 25A [Source:MGI Symbol;Acc:MGI:103198]	12530	9	109704647	109722963	q	1
NM_133234.1	Bbc3	149.49	0.203871	0.182196	1.11896	0.263156	0.512105	0.290641	NM_133234	170770	BCL2 binding component 3 [Source:MGI Symbol;Acc:MGI:2181667]	170770	7	16042318	16052130	q	1
NM_009923.2	Cnp	32493.4	-0.175777	0.157454	-1.11637	0.264266	0.512946	0.289928	NM_009923	12799	2',3'-cyclic nucleotide 3' phosphodiesterase [Source:MGI Symbol;Acc:MGI:88437]	12799	11	100465730	100482555	q	1
NM_008964.3	Ptger2	55.2623	-0.31874	0.288916	-1.10323	0.269929	0.516654	0.2868	NM_008964	19217	prostaglandin E receptor 2 (subtype EP2) [Source:MGI Symbol;Acc:MGI:97794]	19217	14	45225652	45241277	q	1
NM_001110853.1	Crem	318.975	-0.141618	0.127774	-1.10835	0.26771	0.516981	0.286526	NM_001110853	12916	cAMP responsive element modulator [Source:MGI Symbol;Acc:MGI:88495]	12916	18	3266048	3337748	q	-1
NM_152895.2	Kdm5b	1978.14	-0.129637	0.1168	-1.10991	0.26704	0.516981	0.286526	NM_152895	75605	lysine demethylase 5B [Source:MGI Symbol;Acc:MGI:1922855]	75605	1	134487909	134563023	q	1
NM_008625.1	Mrc1	100.997	0.222144	0.201779	1.10093	0.270928	0.517086	0.286438	NM_008625	17533	mannose receptor, C type 1 [Source:MGI Symbol;Acc:MGI:97142]	17533	2	14234203	14336868	q	1
NM_023232.3	Diablo	1219.49	-0.0740213	0.0678276	-1.09132	0.275134	0.517717	0.285907	NM_023232	66593	diablo, IAP-binding mitochondrial protein [Source:MGI Symbol;Acc:MGI:1913843]	66593	5	123647828	123662239	q	-1
NM_010654.2	Klrd1	36.212	0.264106	0.24123	1.09483	0.273592	0.517717	0.285907	NM_010654	16643	killer cell lectin-like receptor, subfamily D, member 1 [Source:MGI Symbol;Acc:MGI:1196275]	16643	6	129568745	129575738	q	1
NM_023138.5	Map2k2	2183.1	-0.0910182	0.0832227	-1.09367	0.2741	0.517717	0.285907	NM_023138	26396	mitogen-activated protein kinase kinase 2 [Source:MGI Symbol;Acc:MGI:1346867]	26396	10	80941749	80969809	q	1
NM_011246.2	Rasgrp1	18434.7	-0.17486	0.159644	-1.09531	0.273379	0.517717	0.285907	NM_011246	19419	RAS guanyl releasing protein 1 [Source:MGI Symbol;Acc:MGI:1314635]	19419	2	117110474	117173482	q	-1
NM_011660.3	Txn1	8749.12	-0.170142	0.155795	-1.09209	0.274792	0.517717	0.285907	NM_011660	22166	thioredoxin 1 [Source:MGI Symbol;Acc:MGI:98874]	22166	4	57943373	57956411	q	-1
NM_008872.1	Plat	635.566	-0.0921151	0.0846466	-1.08823	0.276493	0.518813	0.284989	NM_008872	18791	plasminogen activator, tissue [Source:MGI Symbol;Acc:MGI:97610]	18791	8	23247743	23272860	q	1
NM_009539.2	Zap70	111.646	-0.355623	0.327717	-1.08515	0.277854	0.519906	0.284075	NM_009539	22637	zeta-chain (TCR) associated protein kinase [Source:MGI Symbol;Acc:MGI:99613]	22637	1	36800879	36821899	q	1
NM_016907.3	Spint1	146.13	0.373952	0.338977	1.10318	0.26995	0.51998	0.284013	NM_016907	20732	serine protease inhibitor, Kunitz type 1 [Source:MGI Symbol;Acc:MGI:1338033]	20732	2	119067843	119080008	q	1
NM_007783.2	Csk	756.402	-0.0787513	0.0722299	-1.09029	0.275587	0.52815	0.277242	NM_007783	12988	c-src tyrosine kinase [Source:MGI Symbol;Acc:MGI:88537]	12988	9	57533929	57560914	q	-1
NM_008925.1	Prkcsh	2940.27	-0.067437	0.0629668	-1.07099	0.284173	0.530245	0.275524	NM_008925	19089	protein kinase C substrate 80K-H [Source:MGI Symbol;Acc:MGI:107877]	19089	9	21914102	21925518	q	1
NM_010730.2	Anxa1	48.7985	0.366117	0.337391	1.08514	0.277859	0.53116	0.274774	NM_010730	16952	annexin A1 [Source:MGI Symbol;Acc:MGI:96819]	16952	19	20350792	20368308	q	-1
NM_053094.2	Cd163	44.8092	0.217147	0.203469	1.06722	0.28587	0.531926	0.274149	NM_053094	93671	CD163 antigen [Source:MGI Symbol;Acc:MGI:2135946]	93671	6	124281615	124307486	q	1
NM_031167.5	Il1rn	23.7737	0.262139	0.242498	1.081	0.279698	0.532518	0.273666	NM_031167	16181	interleukin 1 receptor antagonist [Source:MGI Symbol;Acc:MGI:96547]	16181	2	24226865	24241506	q	1
NR_132727.1	Nfe2l2	219.963	0.116531	0.107862	1.08037	0.279976	0.532518	0.273666	NR_132727	NA	NA	NA	NA	NA	NA	NA	NA
NM_008176.3	Cxcl1	34.9394	0.345277	0.324471	1.06412	0.287272	0.533049	0.273233	NM_008176	14825	C-X-C motif chemokine ligand 1 [Source:MGI Symbol;Acc:MGI:108068]	14825	5	91039100	91040974	q	1
NM_011330.3	Ccl11	21.0107	-0.235272	0.222137	-1.05913	0.289542	0.535774	0.271019	NM_011330	20292	C-C motif chemokine ligand 11 [Source:MGI Symbol;Acc:MGI:103576]	20292	11	81948649	81953781	q	1
NM_001123382.1	Il1r1	241.222	0.157967	0.149936	1.05357	0.292082	0.537494	0.269626	NM_001123382	16177	interleukin 1 receptor, type I [Source:MGI Symbol;Acc:MGI:96545]	16177	1	40264240	40356417	q	1
NM_021280.3	Plcg1	1191.91	-0.108241	0.102587	-1.05511	0.291374	0.537494	0.269626	NM_021280	18803	phospholipase C, gamma 1 [Source:MGI Symbol;Acc:MGI:97615]	18803	2	160573220	160617680	q	1
NM_008943.2	Psen1	1358.5	-0.0798242	0.0760197	-1.05005	0.293697	0.538982	0.268426	NM_008943	NA	NA	NA	NA	NA	NA	NA	NA
NM_001177691.1	Gal3st1	537.856	-0.150245	0.141905	-1.05877	0.289705	0.543092	0.265127	NM_001177691	53897	galactose-3-O-sulfotransferase 1 [Source:MGI Symbol;Acc:MGI:1858277]	53897	11	3933636	3949326	q	1
NM_008228.2	Hdac1	636.336	-0.06403	0.0604	-1.0601	0.289099	0.543092	0.265127	NM_008228	433759	histone deacetylase 1 [Source:MGI Symbol;Acc:MGI:108086]	433759	4	129409897	129436506	q	-1
NM_177850.3	Bpi	22.5811	-0.228702	0.219208	-1.04331	0.296804	0.543191	0.265047	NM_177850	329547	bactericidal permeablility increasing protein [Source:MGI Symbol;Acc:MGI:3045315]	329547	2	158100014	158126451	q	1
NM_001077694.2	Dysf	69.3203	-0.174718	0.168722	-1.03554	0.300416	0.546136	0.262699	NM_001077694	26903	dysferlin [Source:MGI Symbol;Acc:MGI:1349385]	26903	6	83985572	84188042	q	1
NM_001134458.1	Il9r	25.0049	-0.236423	0.227983	-1.03702	0.299727	0.546136	0.262699	NM_001134458	16199	interleukin 9 receptor [Source:MGI Symbol;Acc:MGI:96564]	16199	11	32137541	32150279	q	-1
NM_009044.2	Rel	237.559	0.11583	0.111958	1.03458	0.300866	0.546136	0.262699	NM_009044	19696	reticuloendotheliosis oncogene [Source:MGI Symbol;Acc:MGI:97897]	19696	11	23686847	23720970	q	-1
NM_008562.3	Mcl1	2012.32	-0.0580248	0.0562042	-1.03239	0.301888	0.546508	0.262403	NM_008562	17210	myeloid cell leukemia sequence 1 [Source:MGI Symbol;Acc:MGI:101769]	17210	3	95566099	95570487	q	1
NM_033602.2	Peli2	672.92	0.0921826	0.0895935	1.0289	0.303527	0.54799	0.261227	NM_033602	93834	pellino 2 [Source:MGI Symbol;Acc:MGI:1891445]	93834	14	48358280	48519032	q	1
NM_008423.1	Kcnd1	218.249	-0.130883	0.124678	-1.04977	0.293825	0.548719	0.26065	NM_008423	16506	potassium voltage-gated channel, Shal-related family, member 1 [Source:MGI Symbol;Acc:MGI:96671]	16506	X	7688528	7704519	q	1
NM_001177810.1	Rapgef3	1468.88	-0.150664	0.143661	-1.04875	0.294293	0.548719	0.26065	NM_001177810	223864	Rap guanine nucleotide exchange factor (GEF) 3 [Source:MGI Symbol;Acc:MGI:2441741]	223864	15	97642651	97665853	q	-1
NM_172203.1	Nox1	28.0572	0.224758	0.21922	1.02526	0.30524	0.549596	0.259956	NM_172203	237038	NADPH oxidase 1 [Source:MGI Symbol;Acc:MGI:2450016]	237038	X	132987170	133122705	q	-1
NM_009082.2	Rpl29	9733.04	-0.0768088	0.0735463	-1.04436	0.296319	0.551139	0.258739	NM_009082	19944	ribosomal protein L29 [Source:MGI Symbol;Acc:MGI:99687]	19944	9	106306653	106308767	q	1
NM_029295.3	Cklf	92.5189	0.136153	0.133789	1.01767	0.308834	0.553087	0.257207	NM_029295	75458	chemokine-like factor [Source:MGI Symbol;Acc:MGI:1922708]	75458	8	104977493	104991570	q	1
NM_009367.1	Tgfb2	340.647	-0.170852	0.167854	-1.01786	0.308745	0.553087	0.257207	NM_009367	21808	transforming growth factor, beta 2 [Source:MGI Symbol;Acc:MGI:98726]	21808	1	186354989	186438186	q	-1
NM_008338.3	Ifngr2	1576.86	-0.153937	0.151676	-1.01491	0.310149	0.55346	0.256914	NM_008338	15980	interferon gamma receptor 2 [Source:MGI Symbol;Acc:MGI:107654]	15980	16	91343960	91362511	q	1
NM_028679.4	Irak3	132.597	0.166739	0.164477	1.01375	0.3107	0.55346	0.256914	NM_028679	73914	interleukin-1 receptor-associated kinase 3 [Source:MGI Symbol;Acc:MGI:1921164]	73914	10	119977553	120038035	q	-1
NM_007527.3	Bax	445.162	0.0712132	0.0705195	1.00984	0.312574	0.554643	0.255987	NM_007527	12028	BCL2-associated X protein [Source:MGI Symbol;Acc:MGI:99702]	12028	7	45111121	45116322	q	-1
NM_007838.2	Ddost	1323.87	-0.0951816	0.0943423	-1.0089	0.313025	0.554643	0.255987	NM_007838	13200	dolichyl-di-phosphooligosaccharide-protein glycotransferase [Source:MGI Symbol;Acc:MGI:1194508]	13200	4	138032041	138039939	q	1
NM_013672.2	Sp1	695.49	-0.0725729	0.0724229	-1.00207	0.316309	0.558981	0.252603	NM_013672	20683	trans-acting transcription factor 1 [Source:MGI Symbol;Acc:MGI:98372]	20683	15	102314578	102344839	q	1
NM_013842.2	Xbp1	1745.55	-0.0782579	0.0785384	-0.996428	0.319042	0.562322	0.250015	NM_013842	22433	X-box binding protein 1 [Source:MGI Symbol;Acc:MGI:98970]	22433	11	5470659	5475893	q	1
NM_001077403.1	Nrp2	328.825	-0.437652	0.426333	-1.02655	0.304632	0.56383	0.248852	NM_001077403	18187	neuropilin 2 [Source:MGI Symbol;Acc:MGI:1100492]	18187	1	62742444	62857854	q	1
NM_008876.2	Pld2	330.136	0.119766	0.117408	1.02009	0.307687	0.568096	0.245579	NM_008876	18806	phospholipase D2 [Source:MGI Symbol;Acc:MGI:892877]	18806	11	70430890	70448936	q	1
NM_001109752.1	Dlg4	9052.2	-0.134537	0.132491	-1.01545	0.309892	0.570774	0.243535	NM_001109752	13385	discs large MAGUK scaffold protein 4 [Source:MGI Symbol;Acc:MGI:1277959]	13385	11	69907768	69938348	q	1
NM_008048.2	Igfbp7	931.915	0.114608	0.117078	0.978904	0.327628	0.575935	0.239627	NM_008048	29817	insulin-like growth factor binding protein 7 [Source:MGI Symbol;Acc:MGI:1352480]	29817	5	77497087	77555888	q	-1
NM_001042611.1	Cp	480.019	0.163498	0.162756	1.00455	0.315111	0.576343	0.239319	NM_001042611	NA	NA	NA	NA	NA	NA	NA	NA
NM_009632.2	Parp2	662.975	-0.0625513	0.062279	-1.00437	0.315199	0.576343	0.239319	NM_009632	11546	poly (ADP-ribose) polymerase family, member 2 [Source:MGI Symbol;Acc:MGI:1341112]	11546	14	51045298	51058758	q	1
NM_173036.3	Adgrg3	23.3272	-0.232202	0.238988	-0.971606	0.331246	0.576885	0.238911	NM_173036	54672	adhesion G protein-coupled receptor G3 [Source:MGI Symbol;Acc:MGI:1859670]	54672	8	95744320	95771878	q	1
NM_007428.3	Agt	1710.62	-0.155396	0.159283	-0.975595	0.329265	0.576885	0.238911	NM_007428	11606	angiotensinogen [Source:MGI Symbol;Acc:MGI:87963]	11606	8	125283273	125296445	q	-1
NM_015779.2	Elane	20.7418	-0.217939	0.22489	-0.96909	0.3325	0.576885	0.238911	NM_015779	50701	elastase, neutrophil expressed [Source:MGI Symbol;Acc:MGI:2679229]	50701	10	79722081	79724049	q	1
NM_010136.3	Eomes	20.7678	-0.219268	0.226026	-0.970101	0.331996	0.576885	0.238911	NM_010136	13813	eomesodermin [Source:MGI Symbol;Acc:MGI:1201683]	13813	9	118307280	118315200	q	1
NM_174851.3	Ifnlr1	22.7555	-0.211143	0.21826	-0.967389	0.33335	0.576885	0.238911	NM_174851	242700	interferon lambda receptor 1 [Source:MGI Symbol;Acc:MGI:2429859]	242700	4	135413598	135435492	q	1
NM_008518.2	Ltb	27.5606	-0.199403	0.205255	-0.971489	0.331305	0.576885	0.238911	NM_008518	16994	lymphotoxin B [Source:MGI Symbol;Acc:MGI:104796]	16994	17	35413415	35415296	q	1
NM_009190.2	Vps4b	734.388	-0.0851046	0.0851023	-1.00003	0.317298	0.578782	0.237485	NM_009190	20479	vacuolar protein sorting 4B [Source:MGI Symbol;Acc:MGI:1100499]	20479	1	106691801	106724458	q	-1
NM_008551.2	Mapkapk2	1026.87	-0.119961	0.12505	-0.959306	0.337405	0.582393	0.234783	NM_008551	17164	MAP kinase-activated protein kinase 2 [Source:MGI Symbol;Acc:MGI:109298]	17164	1	130981437	131025563	q	-1
NM_025965.3	Ssr1	3678.75	-0.0849286	0.0887342	-0.957113	0.33851	0.582796	0.234483	NM_025965	107513	signal sequence receptor, alpha [Source:MGI Symbol;Acc:MGI:105082]	107513	13	38150581	38178193	q	-1
NM_001190984.1	Lancl1	4546.21	-0.083912	0.0879992	-0.953554	0.34031	0.582889	0.234414	NM_001190984	14768	LanC (bacterial lantibiotic synthetase component C)-like 1 [Source:MGI Symbol;Acc:MGI:1336997]	14768	1	67039676	67078031	q	-1
NM_033042.3	Tnfrsf25	86.567	0.234173	0.245344	0.954465	0.339848	0.582889	0.234414	NM_033042	85030	tumor necrosis factor receptor superfamily, member 25 [Source:MGI Symbol;Acc:MGI:1934667]	85030	4	152200391	152204576	q	1
NM_144818.3	Ncaph	89.9521	0.178853	0.180763	0.989434	0.322451	0.585361	0.232576	NM_144818	215387	non-SMC condensin I complex, subunit H [Source:MGI Symbol;Acc:MGI:2444777]	215387	2	126945729	126975874	q	-1
NM_001171003.1	Mgam	25.9228	0.244156	0.257569	0.947924	0.343168	0.586282	0.231893	NM_001171003	232714	maltase-glucoamylase [Source:MGI Symbol;Acc:MGI:1203495]	232714	6	40605765	40746057	q	1
NM_007669.4	Cdkn1a	439.156	0.175236	0.178504	0.981693	0.326251	0.589432	0.229566	NM_007669	12575	cyclin dependent kinase inhibitor 1A [Source:MGI Symbol;Acc:MGI:104556]	12575	17	29309950	29319701	q	1
NM_145152.4	Lrrc3	905.235	-0.224933	0.229604	-0.979654	0.327257	0.589841	0.229265	NM_145152	237387	leucine rich repeat containing 3 [Source:MGI Symbol;Acc:MGI:2447899]	237387	10	77733409	77738370	q	-1
NM_007840.3	Ddx5	22890.3	-0.0898083	0.0954114	-0.941275	0.346564	0.590574	0.228726	NM_007840	13207	DEAD box helicase 5 [Source:MGI Symbol;Acc:MGI:105037]	13207	11	106671181	106680011	q	-1
NM_001033394.3	Tmem88b	2235.58	-0.17039	0.174555	-0.97614	0.328995	0.591566	0.227997	NM_001033394	320587	transmembrane protein 88B [Source:MGI Symbol;Acc:MGI:2444329]	320587	4	155866048	155870331	q	-1
NM_010102.2	S1pr4	34.5975	0.225133	0.231149	0.973972	0.33007	0.592093	0.22761	NM_010102	13611	sphingosine-1-phosphate receptor 4 [Source:MGI Symbol;Acc:MGI:1333809]	13611	10	81333581	81335966	q	-1
NM_007987.2	Fas	73.4212	0.133255	0.142299	0.936444	0.349045	0.593287	0.226735	NM_007987	14102	Fas cell surface death receptor [Source:MGI Symbol;Acc:MGI:95484]	14102	19	34268066	34305172	q	1
NM_011034.4	Prdx1	621.875	-0.0954337	0.098351	-0.970338	0.331878	0.593928	0.226266	NM_011034	18477	peroxiredoxin 1 [Source:MGI Symbol;Acc:MGI:99523]	18477	4	116542741	116558019	q	1
NM_001081049.1	Kmt2a	2516.54	-0.170016	0.175619	-0.968094	0.332997	0.594526	0.225829	NM_001081049	NA	NA	NA	NA	NA	NA	NA	NA
NM_019952.3	Clcf1	24.0034	0.216129	0.225206	0.959693	0.33721	0.59503	0.225461	NM_019952	56708	cardiotrophin-like cytokine factor 1 [Source:MGI Symbol;Acc:MGI:1930088]	56708	19	4264292	4273544	q	1
NM_026793.2	Myct1	66.6226	0.184812	0.192479	0.960163	0.336973	0.59503	0.225461	NM_026793	68632	myc target 1 [Source:MGI Symbol;Acc:MGI:1915882]	68632	10	5543775	5556904	q	1
NM_199196.1	Suz12	2394.61	-0.0811627	0.0844616	-0.960942	0.336582	0.59503	0.225461	NM_199196	52615	SUZ12 polycomb repressive complex 2 subunit [Source:MGI Symbol;Acc:MGI:1261758]	52615	11	79883932	79924949	q	1
NM_172476.4	Tmc7	621.089	-0.129297	0.133951	-0.965257	0.334416	0.59503	0.225461	NM_172476	209760	transmembrane channel-like gene family 7 [Source:MGI Symbol;Acc:MGI:2443317]	209760	7	118135064	118183959	q	-1
NM_011659.2	Tnfrsf4	32.3133	0.210453	0.226859	0.92768	0.353574	0.59946	0.22224	NM_011659	22163	tumor necrosis factor receptor superfamily, member 4 [Source:MGI Symbol;Acc:MGI:104512]	22163	4	156098300	156101069	q	1
NM_028071.3	Cotl1	2253.21	0.120686	0.127464	0.946823	0.343729	0.600214	0.221694	NM_028071	72042	coactosin like F-actin binding protein 1 [Source:MGI Symbol;Acc:MGI:1919292]	72042	8	120535961	120567283	q	-1
NM_199322.1	Dot1l	308.302	-0.135282	0.142967	-0.946251	0.344021	0.600214	0.221694	NM_199322	208266	DOT1 like histone lysine methyltransferase [Source:MGI Symbol;Acc:MGI:2143886]	208266	10	80591040	80631295	q	1
NM_053190.2	S1pr5	606.728	-0.166786	0.175322	-0.95131	0.341447	0.600214	0.221694	NM_053190	94226	sphingosine-1-phosphate receptor 5 [Source:MGI Symbol;Acc:MGI:2150641]	94226	9	21154208	21159739	q	-1
NM_011426.3	Siglec1	24.156	0.232719	0.2452	0.949101	0.342569	0.600214	0.221694	NM_011426	20612	sialic acid binding Ig-like lectin 1, sialoadhesin [Source:MGI Symbol;Acc:MGI:99668]	20612	2	130911140	130928685	q	-1
NM_178086.3	Fa2h	1528.49	-0.141321	0.151843	-0.930705	0.352006	0.612571	0.212843	NM_178086	338521	fatty acid 2-hydroxylase [Source:MGI Symbol;Acc:MGI:2443327]	338521	8	112071767	112120456	q	-1
NM_010436.2	H2afx	2028.72	-0.100708	0.108604	-0.927291	0.353776	0.612833	0.212658	NM_010436	15270	H2A.X variant histone [Source:MGI Symbol;Acc:MGI:102688]	15270	9	44245991	44247374	q	1
NM_008594.2	Mfge8	995.195	-0.197912	0.213406	-0.927397	0.35372	0.612833	0.212658	NM_008594	17304	milk fat globule EGF and factor V/VIII domain containing [Source:MGI Symbol;Acc:MGI:102768]	17304	7	78783516	78798808	q	-1
NM_080553.3	Itpr3	87.5228	0.138875	0.152658	0.909713	0.362974	0.61384	0.211945	NM_080553	16440	inositol 1,4,5-triphosphate receptor 3 [Source:MGI Symbol;Acc:MGI:96624]	16440	17	27276278	27341197	q	1
NM_007746.2	Map3k8	134.144	0.147133	0.162721	0.904207	0.365886	0.617201	0.209573	NM_007746	26410	mitogen-activated protein kinase kinase kinase 8 [Source:MGI Symbol;Acc:MGI:1346878]	26410	18	4331327	4353015	q	-1
NM_010175.5	Fadd	115.134	-0.138564	0.151604	-0.913991	0.360722	0.61762	0.209278	NM_010175	14082	Fas associated via death domain [Source:MGI Symbol;Acc:MGI:109324]	14082	7	144131055	144136200	q	-1
NM_013595.2	Mbd3	1650.92	-0.073629	0.0802309	-0.917714	0.358769	0.61762	0.209278	NM_013595	17192	methyl-CpG binding domain protein 3 [Source:MGI Symbol;Acc:MGI:1333812]	17192	10	80228373	80235384	q	-1
NM_031252.1	Il23a	22.7781	-0.208347	0.231873	-0.89854	0.368898	0.620715	0.207108	NM_031252	83430	interleukin 23, alpha subunit p19 [Source:MGI Symbol;Acc:MGI:1932410]	83430	10	128132008	128134621	q	-1
NM_001284410.1	Bcl2l11	92.2117	0.221347	0.246662	0.897371	0.369521	0.624391	0.204543	NM_001284410	12125	BCL2 like 11 [Source:MGI Symbol;Acc:MGI:1197519]	12125	2	127967958	128004467	q	1
NM_011817.2	Gadd45g	369.605	0.0969941	0.107939	0.898601	0.368865	0.624391	0.204543	NM_011817	23882	growth arrest and DNA-damage-inducible 45 gamma [Source:MGI Symbol;Acc:MGI:1346325]	23882	13	52000714	52002504	q	1
XR_377436.1	Kdm5a	1756.6	-0.0935556	0.10362	-0.902872	0.366594	0.624391	0.204543	XR_377436	NA	NA	NA	NA	NA	NA	NA	NA
NM_008494.3	Lfng	1062.52	-0.100572	0.111873	-0.898981	0.368663	0.624391	0.204543	NM_008494	16848	LFNG O-fucosylpeptide 3-beta-N-acetylglucosaminyltransferase [Source:MGI Symbol;Acc:MGI:1095413]	16848	5	140593075	140601300	q	1
NM_145838.1	St8sia6	301.799	-0.174707	0.193692	-0.901982	0.367067	0.624391	0.204543	NM_145838	241230	ST8 alpha-N-acetyl-neuraminide alpha-2,8-sialyltransferase 6 [Source:MGI Symbol;Acc:MGI:2386797]	241230	2	13655832	13798875	q	-1
XM_897036.2	Col6a3	99.7251	-0.22896	0.257597	-0.88883	0.374095	0.626089	0.203364	XM_897036	NA	NA	NA	NA	NA	NA	NA	NA
NM_016851.2	Irf6	32.6339	0.214436	0.241543	0.887777	0.374661	0.626089	0.203364	NM_016851	54139	interferon regulatory factor 6 [Source:MGI Symbol;Acc:MGI:1859211]	54139	1	192835419	192854331	q	1
NM_008566.2	Mcm5	226.04	0.138045	0.155281	0.888998	0.374004	0.626089	0.203364	NM_008566	17218	minichromosome maintenance complex component 5 [Source:MGI Symbol;Acc:MGI:103197]	17218	8	75836197	75855067	q	1
NM_022327.5	Ralb	1194.18	-0.139215	0.156626	-0.888834	0.374092	0.626089	0.203364	NM_022327	64143	v-ral simian leukemia viral oncogene B [Source:MGI Symbol;Acc:MGI:1927244]	64143	1	119398035	119432524	q	-1
NM_031842.1	Smarcd1	1249.27	-0.152717	0.171714	-0.889367	0.373806	0.626089	0.203364	NM_031842	83797	SWI/SNF related BAF chromatin remodeling complex subunit D1 [Source:MGI Symbol;Acc:MGI:1933623]	83797	15	99600010	99611872	q	1
NM_007981.3	Acsl1	606.922	-0.0880191	0.0990921	-0.888256	0.374403	0.628395	0.201767	NM_007981	14081	acyl-CoA synthetase long-chain family member 1 [Source:MGI Symbol;Acc:MGI:102797]	14081	8	46924074	46989088	q	1
NM_019864.1	Atr	513.856	-0.0781663	0.0889443	-0.878822	0.379498	0.628924	0.201402	NM_019864	245000	ataxia telangiectasia and Rad3 related [Source:MGI Symbol;Acc:MGI:108028]	245000	9	95739650	95833834	q	1
NM_144787.1	Kdm4c	815.033	-0.0982048	0.111789	-0.878484	0.379681	0.628924	0.201402	NM_144787	76804	lysine (K)-specific demethylase 4C [Source:MGI Symbol;Acc:MGI:1924054]	76804	4	74160734	74324097	q	1
NM_021419.2	Rnf8	828.298	-0.0807974	0.0916838	-0.881262	0.378176	0.628924	0.201402	NM_021419	58230	ring finger protein 8 [Source:MGI Symbol;Acc:MGI:1929069]	58230	17	29833764	29863965	q	1
NM_009594.4	Abl1	1002.08	-0.0948045	0.108292	-0.875455	0.381327	0.630271	0.200473	NM_009594	11350	c-abl oncogene 1, non-receptor tyrosine kinase [Source:MGI Symbol;Acc:MGI:87859]	11350	2	31578388	31694239	q	1
NM_011529.2	Tank	2287.64	-0.0441534	0.0503575	-0.8768	0.380595	0.637187	0.195733	NM_011529	21353	TRAF family member-associated Nf-kappa B activator [Source:MGI Symbol;Acc:MGI:107676]	21353	2	61408929	61484515	q	1
NM_010494.1	Icam2	263.037	-0.126071	0.145841	-0.864445	0.387343	0.637432	0.195566	NM_010494	15896	intercellular adhesion molecule 2 [Source:MGI Symbol;Acc:MGI:96394]	15896	11	106268482	106278901	q	-1
NM_011332.3	Ccl17	38.4451	0.177136	0.202902	0.87301	0.382658	0.639038	0.194473	NM_011332	20295	C-C motif chemokine ligand 17 [Source:MGI Symbol;Acc:MGI:1329039]	20295	8	95537081	95538664	q	1
NM_008194.3	Gk	1111.96	-0.0961385	0.110999	-0.866119	0.386425	0.64372	0.191303	NM_008194	14933	glycerol kinase [Source:MGI Symbol;Acc:MGI:106594]	14933	X	84745543	84820425	q	-1
NM_026385.3	Pllp	955.782	-0.148516	0.174446	-0.851356	0.394571	0.64512	0.190359	NM_026385	67801	plasma membrane proteolipid [Source:MGI Symbol;Acc:MGI:1915051]	67801	8	95401522	95422906	q	-1
NM_010247.2	Xrcc6	540.353	-0.0812451	0.0956491	-0.849407	0.395655	0.645497	0.190106	NM_010247	14375	X-ray repair complementing defective repair in Chinese hamster cells 6 [Source:MGI Symbol;Acc:MGI:95606]	14375	15	81872036	81924286	q	1
NM_011419.3	Kdm5d	316.764	-1.18628	1.40492	-0.844376	0.398459	0.646164	0.189657	NM_011419	20592	lysine demethylase 5D [Source:MGI Symbol;Acc:MGI:99780]	20592	Y	897788	956786		1
NM_011292.2	Rpl9	12557.7	-0.0721005	0.0854189	-0.84408	0.398624	0.646164	0.189657	NM_011292	20005	ribosomal protein L9 [Source:MGI Symbol;Acc:MGI:1298373]	20005	5	65545707	65548787	q	-1
NM_009484.2	Uty	273.764	-1.01565	1.20294	-0.84431	0.398496	0.646164	0.189657	NM_009484	22290	ubiquitously transcribed tetratricopeptide repeat containing, Y-linked [Source:MGI Symbol;Acc:MGI:894810]	22290	Y	1096861	1245759		-1
NM_019739.3	Foxo1	2044.5	0.253457	0.295733	0.857045	0.39142	0.6472	0.188962	NM_019739	56458	forkhead box O1 [Source:MGI Symbol;Acc:MGI:1890077]	56458	3	52175757	52260642	q	1
NM_001029837.2	Pik3cd	900.618	-0.196774	0.229513	-0.857355	0.391249	0.6472	0.188962	NM_001029837	18707	phosphatidylinositol-4,5-bisphosphate 3-kinase catalytic subunit delta [Source:MGI Symbol;Acc:MGI:1098211]	18707	4	149733625	149787028	q	-1
NM_016769.4	Smad3	277.62	0.18305	0.212881	0.859872	0.38986	0.6472	0.188962	NM_016769	17127	SMAD family member 3 [Source:MGI Symbol;Acc:MGI:1201674]	17127	9	63554049	63665276	q	-1
NM_001080793.1	Ash2l	1579.07	-0.0630224	0.0752715	-0.837268	0.402442	0.650958	0.186447	NM_001080793	23808	ASH2 like histone lysine methyltransferase complex subunit [Source:MGI Symbol;Acc:MGI:1344416]	23808	8	26306024	26337722	q	-1
NM_010546.2	Ikbkb	927.491	-0.0468976	0.0555277	-0.844581	0.398345	0.651052	0.186384	NM_010546	16150	inhibitor of kappaB kinase beta [Source:MGI Symbol;Acc:MGI:1338071]	16150	8	23149228	23196605	q	-1
NM_178590.2	Ikbkg	452.129	-0.0893034	0.105486	-0.846587	0.397225	0.651052	0.186384	NM_178590	16151	inhibitor of kappaB kinase gamma [Source:MGI Symbol;Acc:MGI:1338074]	16151	X	73436896	73497460	q	1
NM_178258.5	Il22ra2	21.1477	-0.190686	0.224963	-0.847634	0.396642	0.651052	0.186384	NM_178258	237310	interleukin 22 receptor, alpha 2 [Source:MGI Symbol;Acc:MGI:2665114]	237310	10	19497746	19510429	q	1
NM_011198.3	Ptgs2	52.7186	0.151889	0.178563	0.850617	0.394982	0.651052	0.186384	NM_011198	19225	prostaglandin-endoperoxide synthase 2 [Source:MGI Symbol;Acc:MGI:97798]	19225	1	149975782	149983978	q	1
NM_009068.3	Ripk1	103.382	0.103666	0.122815	0.844083	0.398623	0.651052	0.186384	NM_009068	19766	receptor (TNFRSF)-interacting serine-threonine kinase 1 [Source:MGI Symbol;Acc:MGI:108212]	19766	13	34186346	34221130	q	1
NM_009752.2	Glb1	273.212	-0.0878617	0.104348	-0.84201	0.399782	0.651352	0.186184	NM_009752	12091	galactosidase, beta 1 [Source:MGI Symbol;Acc:MGI:88151]	12091	9	114230144	114303966	q	1
NM_001025599.3	Trim26	648.917	-0.0702644	0.0838173	-0.838305	0.40186	0.653144	0.184991	NM_001025599	22670	tripartite motif-containing 26 [Source:MGI Symbol;Acc:MGI:1337056]	22670	17	37148026	37170290	q	1
NM_026121.3	Bag4	1815.51	-0.113329	0.137128	-0.826447	0.40855	0.654195	0.184293	NM_026121	67384	BCL2-associated athanogene 4 [Source:MGI Symbol;Acc:MGI:1914634]	67384	8	26254566	26275315	q	-1
NM_009856.2	Cd83	952.764	-0.247343	0.299416	-0.826085	0.408756	0.654195	0.184293	NM_009856	12522	CD83 antigen [Source:MGI Symbol;Acc:MGI:1328316]	12522	13	43938251	43956608	q	1
NM_013885.2	Clic4	4324.51	-0.0647257	0.0783536	-0.826071	0.408764	0.654195	0.184293	NM_013885	29876	chloride intracellular channel 4 [Source:MGI Symbol;Acc:MGI:1352754]	29876	4	134941280	135000125	q	-1
NM_146037.1	Kcnk13	154.53	-0.123446	0.148747	-0.829905	0.406593	0.654195	0.184293	NM_146037	217826	potassium channel, subfamily K, member 13 [Source:MGI Symbol;Acc:MGI:2384976]	217826	12	99930758	100028941	q	1
NM_008869.2	Pla2g4a	136.519	0.114434	0.138153	0.828312	0.407494	0.654195	0.184293	NM_008869	18783	phospholipase A2, group IVA (cytosolic, calcium-dependent) [Source:MGI Symbol;Acc:MGI:1195256]	18783	1	149705369	149837041	q	-1
NM_080638.2	Mvp	272.089	0.0935422	0.112298	0.832982	0.404855	0.656415	0.182821	NM_080638	78388	major vault protein [Source:MGI Symbol;Acc:MGI:1925638]	78388	7	126586032	126613793	q	-1
NM_013488.2	Cd4	921.215	0.381364	0.459777	0.829456	0.406847	0.656458	0.182793	NM_013488	12504	CD4 antigen [Source:MGI Symbol;Acc:MGI:88335]	12504	6	124841655	124865184	q	-1
NM_177740.5	Rgma	998.351	-0.0878789	0.105768	-0.830862	0.406051	0.656458	0.182793	NM_177740	244058	repulsive guidance molecule family member A [Source:MGI Symbol;Acc:MGI:2679262]	244058	7	73025257	73069647	q	1
NM_025963.3	Rps10	3260.71	-0.0540216	0.065782	-0.821222	0.41152	0.657216	0.182292	NM_025963	67097	ribosomal protein S10 [Source:MGI Symbol;Acc:MGI:1914347]	67097	17	27849392	27855643	q	-1
NM_198297.3	Trat1	64.7501	0.277235	0.338284	0.819534	0.412482	0.657366	0.182193	NM_198297	77647	T cell receptor associated transmembrane adaptor 1 [Source:MGI Symbol;Acc:MGI:1924897]	77647	16	48551137	48592384	q	-1
NM_007719.2	Ccr7	20.8156	-0.18418	0.223948	-0.822422	0.410837	0.659086	0.181058	NM_007719	12775	C-C motif chemokine receptor 7 [Source:MGI Symbol;Acc:MGI:103011]	12775	11	99035022	99045903	q	-1
NM_001161790.1	Mefv	20.8167	-0.184134	0.224179	-0.821371	0.411435	0.659086	0.181058	NM_001161790	54483	Mediterranean fever [Source:MGI Symbol;Acc:MGI:1859396]	54483	16	3525082	3535961	q	-1
NM_020275.4	Tnfrsf10b	30.0598	0.182252	0.221223	0.82384	0.41003	0.659086	0.181058	NM_020275	21933	tumor necrosis factor receptor superfamily, member 10b [Source:MGI Symbol;Acc:MGI:1341090]	21933	14	70004921	70021860	q	1
NM_033622.1	Tnfsf13b	75.9537	0.159272	0.195303	0.815514	0.414778	0.662851	0.178584	NM_033622	24099	tumor necrosis factor (ligand) superfamily, member 13b [Source:MGI Symbol;Acc:MGI:1344376]	24099	8	10056467	10089072	q	1
NM_001040691.1	Ung	129.928	-0.0932138	0.11529	-0.808515	0.418794	0.666024	0.17651	NM_001040691	22256	uracil DNA glycosylase [Source:MGI Symbol;Acc:MGI:109352]	22256	5	114268447	114277384	q	1
NM_013674.1	Irf4	22.3736	-0.182722	0.227091	-0.804619	0.42104	0.668511	0.174891	NM_013674	16364	interferon regulatory factor 4 [Source:MGI Symbol;Acc:MGI:1096873]	16364	13	30933209	30950959	q	1
NM_009097.4	Rps6ka1	356.663	0.0635269	0.0787792	0.806392	0.420017	0.668511	0.174891	NM_009097	20111	ribosomal protein S6 kinase polypeptide 1 [Source:MGI Symbol;Acc:MGI:104558]	20111	4	133574601	133615108	q	-1
NM_138667.2	Tab2	1824.35	-0.0564537	0.0702047	-0.80413	0.421322	0.668511	0.174891	NM_138667	68652	TGF-beta activated kinase 1/MAP3K7 binding protein 2 [Source:MGI Symbol;Acc:MGI:1915902]	68652	10	7781417	7831994	q	-1
NM_009138.3	Ccl25	242.659	0.0859016	0.107193	0.801372	0.422916	0.669451	0.174281	NM_009138	20300	C-C motif chemokine ligand 25 [Source:MGI Symbol;Acc:MGI:1099448]	20300	8	4375210	4410020	q	1
NM_011488.2	Stat5a	112.212	0.0915302	0.114504	0.799361	0.424081	0.669707	0.174115	NM_011488	20850	signal transducer and activator of transcription 5A [Source:MGI Symbol;Acc:MGI:103036]	20850	11	100750177	100775995	q	1
NM_173433.2	Kdm4d	92.2072	-0.104608	0.130364	-0.802428	0.422306	0.6702	0.173796	NM_173433	244694	lysine (K)-specific demethylase 4D [Source:MGI Symbol;Acc:MGI:3606484]	244694	9	14373844	14411778	q	-1
NM_028119.5	Ddb2	295.263	-0.0632822	0.0791273	-0.799752	0.423854	0.670883	0.173353	NM_028119	107986	damage specific DNA binding protein 2 [Source:MGI Symbol;Acc:MGI:1355314]	107986	2	91041917	91067327	q	-1
NM_145713.3	Hist1h1d	23.0548	0.192832	0.241455	0.798623	0.424509	0.670883	0.173353	NM_145713	14957	H1.3 linker histone, cluster member [Source:MGI Symbol;Acc:MGI:107502]	14957	13	23737436	23744860	q	1
NM_007540.4	Bdnf	134.898	-0.33522	0.442045	-0.758339	0.448248	0.671311	0.173076	NM_007540	12064	brain derived neurotrophic factor [Source:MGI Symbol;Acc:MGI:88145]	12064	2	109505045	109557352	q	1
NM_016778.2	Bok	1293	-0.331397	0.427081	-0.775958	0.437774	0.671311	0.173076	NM_016778	51800	BCL2-related ovarian killer [Source:MGI Symbol;Acc:MGI:1858494]	51800	1	93613382	93623486	q	1
NM_007691.5	Chek1	99.6429	0.12188	0.160727	0.758301	0.448271	0.671311	0.173076	NM_007691	12649	checkpoint kinase 1 [Source:MGI Symbol;Acc:MGI:1202065]	12649	9	36619778	36638361	q	-1
NM_016681.3	Chek2	63.0443	0.133343	0.170433	0.782377	0.433993	0.671311	0.173076	NM_016681	50883	checkpoint kinase 2 [Source:MGI Symbol;Acc:MGI:1355321]	50883	5	110987845	111022011	q	1
NM_177372.3	Dna2	55.3069	0.129777	0.169428	0.765971	0.443693	0.671311	0.173076	NM_177372	327762	DNA replication helicase/nuclease 2 [Source:MGI Symbol;Acc:MGI:2443732]	327762	10	62782805	62809964	q	1
NM_010171.3	F3	2356.52	-0.0576067	0.0761609	-0.756382	0.44942	0.671311	0.173076	NM_010171	14066	coagulation factor III [Source:MGI Symbol;Acc:MGI:88381]	14066	3	121517186	121528697	q	1
NM_145141.2	Fcrla	20.0896	-0.173799	0.232594	-0.747221	0.45493	0.671311	0.173076	NM_145141	98752	Fc receptor-like A [Source:MGI Symbol;Acc:MGI:2138647]	98752	1	170745145	170755152	q	-1
NM_020005.3	Kat2b	1341.61	-0.0874255	0.116445	-0.750785	0.452782	0.671311	0.173076	NM_020005	18519	K(lysine) acetyltransferase 2B [Source:MGI Symbol;Acc:MGI:1343094]	18519	17	53873889	53979748	q	1
NM_177749.3	Kir3dl1	20.0896	-0.173799	0.232594	-0.747221	0.45493	0.671311	0.173076	NM_177749	245616	killer cell immunoglobulin-like receptor, three domains, long cytoplasmic tail, 1 [Source:MGI Symbol;Acc:MGI:2652397]	245616	X	135418748	135435058	q	1
NM_008743.2	Nthl1	170.342	-0.083516	0.106665	-0.782977	0.433641	0.671311	0.173076	NM_008743	18207	nth (endonuclease III)-like 1 (E.coli) [Source:MGI Symbol;Acc:MGI:1313275]	18207	17	24851654	24857811	q	1
NM_001024955.1	Pik3r1	2354.1	-0.0518578	0.0670417	-0.773515	0.439218	0.671311	0.173076	NM_001024955	18708	phosphoinositide-3-kinase regulatory subunit 1 [Source:MGI Symbol;Acc:MGI:97583]	18708	13	101817071	101904725	q	-1
NM_133209.2	Pilrb1	20.0896	-0.173799	0.232594	-0.747221	0.45493	0.671311	0.173076	NM_133209	170741	paired immunoglobin-like type 2 receptor beta 1 [Source:MGI Symbol;Acc:MGI:2450532]	170741	5	137850409	137856368	q	-1
NM_009019.2	Rag1	20.0896	-0.173799	0.232594	-0.747221	0.45493	0.671311	0.173076	NM_009019	19373	recombination activating 1 [Source:MGI Symbol;Acc:MGI:97848]	19373	2	101468627	101479846	q	-1
NM_080853.3	Slc17a6	7915.68	-0.486406	0.614828	-0.791125	0.428871	0.671311	0.173076	NM_080853	140919	solute carrier family 17 (sodium-dependent inorganic phosphate cotransporter), member 6 [Source:MGI Symbol;Acc:MGI:2156052]	140919	7	51271754	51320867	q	1
NM_001159633.1	Slc44a1	6225.23	-0.0916721	0.119691	-0.765908	0.443731	0.671311	0.173076	NM_001159633	100434	solute carrier family 44, member 1 [Source:MGI Symbol;Acc:MGI:2140592]	100434	4	53440413	53622478	q	1
NM_001081278.2	Tbc1d4	326.953	-0.107208	0.139725	-0.767282	0.442914	0.671311	0.173076	NM_001081278	210789	TBC1 domain family, member 4 [Source:MGI Symbol;Acc:MGI:2429660]	210789	14	101679796	101846627	q	-1
NM_027384.1	Tet1	781.054	-0.0689248	0.0907513	-0.759491	0.447559	0.671311	0.173076	NM_027384	NA	NA	NA	NA	NA	NA	NA	NA
NM_028075.2	Tnfrsf13c	20.0896	-0.173799	0.232594	-0.747221	0.45493	0.671311	0.173076	NM_028075	72049	tumor necrosis factor receptor superfamily, member 13c [Source:MGI Symbol;Acc:MGI:1919299]	72049	15	82105944	82108570	q	-1
NM_009403.2	Tnfsf8	20.0896	-0.173799	0.232594	-0.747221	0.45493	0.671311	0.173076	NM_009403	21949	tumor necrosis factor (ligand) superfamily, member 8 [Source:MGI Symbol;Acc:MGI:88328]	21949	4	63749545	63779584	q	-1
NM_021407.3	Trem3	20.0896	-0.173799	0.232594	-0.747221	0.45493	0.671311	0.173076	NM_021407	58218	triggering receptor expressed on myeloid cells 3 [Source:MGI Symbol;Acc:MGI:1930003]	58218	17	48554805	48565869	q	1
NM_133655.2	Cd81	13808.2	0.0492203	0.0621653	0.791765	0.428498	0.675086	0.170641	NM_133655	12520	CD81 antigen [Source:MGI Symbol;Acc:MGI:1096398]	12520	7	142606476	142621671	q	1
NM_007643.3	Cd36	59.365	0.141978	0.18004	0.788593	0.43035	0.676409	0.169791	NM_007643	12491	CD36 molecule [Source:MGI Symbol;Acc:MGI:107899]	12491	5	17986688	18093799	q	-1
NM_133957.3	Nfat5	1165.83	-0.0848707	0.107928	-0.786362	0.431655	0.676868	0.169496	NM_133957	54446	nuclear factor of activated T cells 5 [Source:MGI Symbol;Acc:MGI:1859333]	54446	8	108020102	108106149	q	1
NM_029364.4	Gns	1850.11	-0.0395906	0.0504887	-0.784148	0.432953	0.677314	0.16921	NM_029364	75612	glucosamine (N-acetyl)-6-sulfatase [Source:MGI Symbol;Acc:MGI:1922862]	75612	10	121200995	121233154	q	1
NM_010504.2	Ifna4	23.0043	0.202192	0.259119	0.780304	0.435212	0.679256	0.167966	NM_010504	15967	interferon alpha 4 [Source:MGI Symbol;Acc:MGI:107664]	15967	4	88760098	88760658	q	1
NM_009916.2	Ccr4	22.8072	0.183694	0.236923	0.775331	0.438144	0.682238	0.166064	NM_009916	12773	C-C motif chemokine receptor 4 [Source:MGI Symbol;Acc:MGI:107824]	12773	9	114319384	114333984	q	-1
NM_008812.2	Padi2	1352.84	0.119306	0.16301	0.731895	0.464233	0.682377	0.165975	NM_008812	18600	peptidyl arginine deiminase, type II [Source:MGI Symbol;Acc:MGI:1338892]	18600	4	140633655	140679897	q	1
NM_009630.3	Adora2a	2036.76	0.35697	0.46395	0.769415	0.441647	0.685154	0.164212	NM_009630	11540	adenosine A2a receptor [Source:MGI Symbol;Acc:MGI:99402]	11540	10	75152711	75170618	q	1
NM_007425.2	Ager	32.2126	-0.198171	0.258024	-0.768032	0.442468	0.685154	0.164212	NM_007425	11596	advanced glycosylation end product-specific receptor [Source:MGI Symbol;Acc:MGI:893592]	11596	17	34816836	34819910	q	1
NM_145837.3	Il17d	96.7973	-0.115351	0.150396	-0.766979	0.443094	0.685154	0.164212	NM_145837	239114	interleukin 17D [Source:MGI Symbol;Acc:MGI:2446510]	239114	14	57762234	57780623	q	1
NM_013486.2	Cd2	24.6852	0.186554	0.248471	0.750805	0.45277	0.696183	0.157277	NM_013486	12481	CD2 antigen [Source:MGI Symbol;Acc:MGI:88320]	12481	3	101183215	101195255	q	-1
NM_001037801.2	Cd6	22.8775	0.168647	0.225547	0.747724	0.454626	0.696183	0.157277	NM_001037801	12511	CD6 antigen [Source:MGI Symbol;Acc:MGI:103566]	12511	19	10766705	10807422	q	-1
NM_133656.5	Crk	383.863	-0.059722	0.0797424	-0.748937	0.453895	0.696183	0.157277	NM_133656	12928	v-crk avian sarcoma virus CT10 oncogene homolog [Source:MGI Symbol;Acc:MGI:88508]	12928	11	75570085	75597734	q	1
NM_009284.2	Stat6	85.081	0.154191	0.206585	0.746382	0.455437	0.696183	0.157277	NM_009284	20852	signal transducer and activator of transcription 6 [Source:MGI Symbol;Acc:MGI:103034]	20852	10	127478855	127496826	q	1
NM_133212.2	Tlr8	22.6969	0.174084	0.231873	0.750774	0.452789	0.696183	0.157277	NM_133212	170744	toll-like receptor 8 [Source:MGI Symbol;Acc:MGI:2176887]	170744	X	166025692	166047325	q	-1
NM_177821.6	Ep300	1579.07	-0.074889	0.101512	-0.737734	0.460676	0.696225	0.15725	NM_177821	328572	E1A binding protein p300 [Source:MGI Symbol;Acc:MGI:1276116]	328572	15	81469552	81536278	q	1
NM_015797.3	Fbxo6	331.828	-0.0775485	0.104845	-0.739646	0.459515	0.696225	0.15725	NM_015797	50762	F-box protein 6 [Source:MGI Symbol;Acc:MGI:1354743]	50762	4	148230173	148236597	q	-1
NM_008371.5	Il7	26.7469	0.188245	0.252997	0.744061	0.45684	0.696225	0.15725	NM_008371	16196	interleukin 7 [Source:MGI Symbol;Acc:MGI:96561]	16196	3	7635054	7678820	q	-1
NM_001276402.1	Lef1	1216.97	-0.362999	0.488639	-0.742877	0.457556	0.696225	0.15725	NM_001276402	16842	lymphoid enhancer binding factor 1 [Source:MGI Symbol;Acc:MGI:96770]	16842	3	130904120	131018005	q	1
NM_011608.1	Tnfrsf17	28.6807	0.180732	0.244627	0.738808	0.460024	0.696225	0.15725	NM_011608	21935	tumor necrosis factor receptor superfamily, member 17 [Source:MGI Symbol;Acc:MGI:1343050]	21935	16	11131676	11137938	q	1
NM_080793.5	Setd7	2803.63	-0.149199	0.210531	-0.708682	0.478522	0.699307	0.155332	NM_080793	73251	SET domain containing (lysine methyltransferase) 7 [Source:MGI Symbol;Acc:MGI:1920501]	73251	3	51422740	51468300	q	-1
NM_007836.1	Gadd45a	527.904	0.133094	0.188387	0.706495	0.479881	0.699613	0.155142	NM_007836	13197	growth arrest and DNA-damage-inducible 45 alpha [Source:MGI Symbol;Acc:MGI:107799]	13197	6	67012080	67014441	q	-1
NM_001080820.2	Cass4	30.9275	0.144699	0.206352	0.701227	0.483161	0.699727	0.155071	NM_001080820	320664	Cas scaffolding protein family member 4 [Source:MGI Symbol;Acc:MGI:2444482]	320664	2	172235714	172275677	q	1
NM_007891.4	E2f1	203.216	-0.154235	0.219652	-0.702177	0.482569	0.699727	0.155071	NM_007891	13555	E2F transcription factor 1 [Source:MGI Symbol;Acc:MGI:101941]	13555	2	154401327	154411812	q	-1
NM_010220.3	Fkbp5	375.214	-0.108334	0.154587	-0.700795	0.483431	0.699727	0.155071	NM_010220	14229	FK506 binding protein 5 [Source:MGI Symbol;Acc:MGI:104670]	14229	17	28618068	28736501	q	-1
NM_173386.4	Mb21d1	33.9675	0.141685	0.203681	0.695624	0.486664	0.700389	0.154661	NM_173386	214763	cyclic GMP-AMP synthase [Source:MGI Symbol;Acc:MGI:2442261]	214763	9	78337808	78350519	q	-1
NM_011159.2	Prkdc	706.887	-0.0672152	0.0964232	-0.697085	0.48575	0.700389	0.154661	NM_011159	19090	protein kinase, DNA activated, catalytic polypeptide [Source:MGI Symbol;Acc:MGI:104779]	19090	16	15455730	15660099	q	1
NM_001080819.1	Arid1a	1598.94	-0.083683	0.120863	-0.692382	0.488698	0.700652	0.154498	NM_001080819	93760	AT-rich interaction domain 1A [Source:MGI Symbol;Acc:MGI:1935147]	93760	4	133406319	133484080	q	-1
NM_010515.1	Igf2r	457.775	-0.0824305	0.118834	-0.69366	0.487896	0.700652	0.154498	NM_010515	16004	insulin-like growth factor 2 receptor [Source:MGI Symbol;Acc:MGI:96435]	16004	17	12901293	12988551	q	-1
NM_008124.2	Gjb1	1815.14	-0.139962	0.202852	-0.689967	0.490215	0.701498	0.153973	NM_008124	14618	gap junction protein, beta 1 [Source:MGI Symbol;Acc:MGI:95719]	14618	X	100419984	100429235	q	1
NM_198006.4	Coa5	2285.11	-0.063406	0.0921654	-0.687959	0.491479	0.70198	0.153675	NM_198006	76178	cytochrome C oxidase assembly factor 5 [Source:MGI Symbol;Acc:MGI:1923428]	76178	1	37456165	37469184	q	-1
NM_181401.3	Tmem64	1997.78	-0.084964	0.123998	-0.685202	0.493216	0.703135	0.152961	NM_181401	100201	transmembrane protein 64 [Source:MGI Symbol;Acc:MGI:2140359]	100201	4	15265831	15286753	q	1
NM_011951.3	Mapk14	2446.88	-0.0536154	0.0736781	-0.727698	0.466799	0.703886	0.152498	NM_011951	26416	mitogen-activated protein kinase 14 [Source:MGI Symbol;Acc:MGI:1346865]	26416	17	28910303	28967380	q	1
NM_022309.4	Cbfb	755.428	0.0753201	0.103846	0.725303	0.468266	0.704509	0.152114	NM_022309	12400	core binding factor beta [Source:MGI Symbol;Acc:MGI:99851]	12400	8	105897306	105944621	q	1
NM_008730.2	Nptx1	668.698	-0.218971	0.322806	-0.678337	0.497558	0.707992	0.149972	NM_008730	18164	neuronal pentraxin 1 [Source:MGI Symbol;Acc:MGI:107811]	18164	11	119429545	119438579	q	-1
NM_138646.3	Hps4	273.649	-0.0752359	0.111345	-0.6757	0.499231	0.70904	0.14933	NM_138646	192232	HPS4, biogenesis of lysosomal organelles complex 3 subunit 2 [Source:MGI Symbol;Acc:MGI:2177742]	192232	5	112490949	112526280	q	1
NM_008234.3	Hells	173.261	0.0878888	0.130518	0.673382	0.500704	0.7098	0.148864	NM_008234	15201	helicase, lymphoid specific [Source:MGI Symbol;Acc:MGI:106209]	15201	19	38919359	38959495	q	1
NM_010153.1	Erbb3	430.474	-0.103175	0.15358	-0.671801	0.50171	0.709897	0.148805	NM_010153	13867	erb-b2 receptor tyrosine kinase 3 [Source:MGI Symbol;Acc:MGI:95411]	13867	10	128403392	128425521	q	-1
NM_001276719.1	Ackr2	69.5045	0.197999	0.277544	0.713395	0.475601	0.712336	0.147315	NM_001276719	59289	atypical chemokine receptor 2 [Source:MGI Symbol;Acc:MGI:1891697]	59289	9	121727421	121740140	q	1
NM_017466.4	Ccrl2	67.7178	0.122389	0.171187	0.714941	0.474645	0.712336	0.147315	NM_017466	54199	C-C motif chemokine receptor-like 2 [Source:MGI Symbol;Acc:MGI:1920904]	54199	9	110883554	110886587	q	-1
NM_009741.3	Bcl2	308.523	-0.11439	0.161275	-0.709287	0.478147	0.714546	0.14597	NM_009741	12043	B cell leukemia/lymphoma 2 [Source:MGI Symbol;Acc:MGI:88138]	12043	1	106465908	106642004	q	-1
NM_008604.3	Mme	883.301	0.29693	0.420147	0.706729	0.479735	0.715319	0.1455	NM_008604	17380	membrane metallo endopeptidase [Source:MGI Symbol;Acc:MGI:97004]	17380	3	63148958	63293451	q	1
NM_030688.1	Il1rapl2	337.9	-0.150821	0.21605	-0.698085	0.485124	0.721744	0.141617	NM_030688	60367	interleukin 1 receptor accessory protein-like 2 [Source:MGI Symbol;Acc:MGI:1913106]	60367	X	136471357	137747695	q	1
NM_025272.2	Atp6v0e	726.17	0.0423212	0.0648959	0.65214	0.514311	0.721762	0.141606	NM_025272	11974	ATPase, H+ transporting, lysosomal V0 subunit E [Source:MGI Symbol;Acc:MGI:1328318]	11974	17	26882205	26918621	q	1
NM_009811.3	Casp6	169.84	0.0706713	0.109156	0.647435	0.51735	0.721762	0.141606	NM_009811	12368	caspase 6 [Source:MGI Symbol;Acc:MGI:1312921]	12368	3	129695074	129707752	q	1
NM_145395.2	Duoxa1	28.1855	0.137347	0.211268	0.650107	0.515623	0.721762	0.141606	NM_145395	NA	NA	NA	NA	NA	NA	NA	NA
NM_001039364.2	Mobp	35699.6	-0.117053	0.18176	-0.643995	0.519579	0.721762	0.141606	NM_001039364	NA	NA	NA	NA	NA	NA	NA	NA
NM_010814.2	Mog	4376.55	-0.108043	0.16856	-0.640978	0.521537	0.721762	0.141606	NM_010814	17441	myelin oligodendrocyte glycoprotein [Source:MGI Symbol;Acc:MGI:97435]	17441	17	37321635	37334290	q	-1
NM_009160.2	Sftpd	29.9093	0.15004	0.233252	0.643252	0.520061	0.721762	0.141606	NM_009160	20390	surfactant associated protein D [Source:MGI Symbol;Acc:MGI:109515]	20390	14	40894171	40907106	q	-1
NM_016718.2	Ninj2	154.623	-0.105305	0.165803	-0.635123	0.525348	0.725144	0.139576	NM_016718	29862	ninjurin 2 [Source:MGI Symbol;Acc:MGI:1352751]	29862	6	120070311	120177300	q	1
NM_001077411.1	Gba	655.992	-0.0619382	0.0894628	-0.692335	0.488727	0.725423	0.139409	NM_001077411	14466	glucosylceramidase beta 1 [Source:MGI Symbol;Acc:MGI:95665]	14466	3	89110235	89116273	q	1
NM_001161842.1	Il18r1	24.5112	0.169383	0.245242	0.690677	0.489769	0.725423	0.139409	NM_001161842	16182	interleukin 18 receptor 1 [Source:MGI Symbol;Acc:MGI:105383]	16182	1	40504712	40540014	q	1
NM_001160411.1	Gstm4	303.327	-0.0614351	0.0905484	-0.678478	0.497469	0.728748	0.137423	NM_001160411	14865	glutathione S-transferase, mu 4 [Source:MGI Symbol;Acc:MGI:95862]	14865	3	107947724	107952210	q	-1
NM_008416.1	Junb	1521.2	-0.316143	0.465432	-0.679247	0.496981	0.728748	0.137423	NM_008416	16477	jun B proto-oncogene [Source:MGI Symbol;Acc:MGI:96647]	16477	8	85701113	85705347	q	-1
NM_008538.2	Marcks	710.424	0.127671	0.187251	0.68182	0.495352	0.728748	0.137423	NM_008538	17118	myristoylated alanine rich protein kinase C substrate [Source:MGI Symbol;Acc:MGI:96907]	17118	10	37009371	37014916	q	-1
NM_023059.3	Sigirr	51.8018	-0.126823	0.186896	-0.678576	0.497407	0.728748	0.137423	NM_023059	24058	single immunoglobulin and toll-interleukin 1 receptor (TIR) domain [Source:MGI Symbol;Acc:MGI:1344402]	24058	7	140671088	140680485	q	-1
NM_011580.3	Thbs1	49.3629	0.166669	0.243811	0.683597	0.49423	0.728748	0.137423	NM_011580	21825	thrombospondin 1 [Source:MGI Symbol;Acc:MGI:98737]	21825	2	117942357	117957614	q	1
NM_025864.3	Tmem206	667.419	-0.0657272	0.10462	-0.628247	0.529842	0.729255	0.13712	NM_025864	66950	proton activated chloride channel 1 [Source:MGI Symbol;Acc:MGI:1914200]	66950	1	191058109	191083111	q	1
NM_028173.5	Tram1	1042.68	-0.064065	0.0949212	-0.674929	0.499721	0.730446	0.136412	NM_028173	72265	translocating chain-associating membrane protein 1 [Source:MGI Symbol;Acc:MGI:1919515]	72265	1	13634922	13660134	q	-1
NM_025770.3	Atg10	232.059	0.0791122	0.119673	0.661068	0.508569	0.736706	0.132706	NM_025770	66795	autophagy related 10 [Source:MGI Symbol;Acc:MGI:1914045]	66795	13	91083475	91372087	q	-1
NM_016971.1	Il22	105.411	-0.34754	0.523522	-0.66385	0.506787	0.736706	0.132706	NM_016971	50929	interleukin 22 [Source:MGI Symbol;Acc:MGI:1355307]	50929	10	118040847	118045952	q	1
NM_010591.2	Jun	1462.13	0.0914713	0.13868	0.659588	0.509518	0.736706	0.132706	NM_010591	16476	jun proto-oncogene [Source:MGI Symbol;Acc:MGI:96646]	16476	4	94937271	94940459	q	-1
NM_009243.3	Serpina1a	44.655	0.232127	0.351769	0.659884	0.509328	0.736706	0.132706	NM_009243	20700	serine (or cysteine) peptidase inhibitor, clade A, member 1A [Source:MGI Symbol;Acc:MGI:891971]	20700	12	103819848	103829821	q	-1
NM_198297.4	Trat1	48.0246	0.212181	0.32111	0.660774	0.508757	0.736706	0.132706	NM_198297	77647	T cell receptor associated transmembrane adaptor 1 [Source:MGI Symbol;Acc:MGI:1924897]	77647	16	48551137	48592384	q	-1
NM_001040398.1	Setd1b	1180.07	-0.0662085	0.107316	-0.616947	0.53727	0.736799	0.132651	NM_001040398	208043	SET domain containing 1B [Source:MGI Symbol;Acc:MGI:2652820]	208043	5	123280256	123306692	q	1
NM_001177752.1	Pfkfb3	864.984	0.103643	0.1576	0.657638	0.510771	0.736922	0.132579	NM_001177752	170768	6-phosphofructo-2-kinase/fructose-2,6-biphosphatase 3 [Source:MGI Symbol;Acc:MGI:2181202]	170768	2	11476244	11558888	q	-1
NM_009846.2	Cd24a	718.363	-0.118083	0.193422	-0.610493	0.541536	0.739937	0.130805	NM_009846	12484	CD24a antigen [Source:MGI Symbol;Acc:MGI:88323]	12484	10	43454280	43460261	q	1
NM_001033244.3	Fancd2	44.3465	0.159872	0.263131	0.607577	0.543468	0.739937	0.130805	NM_001033244	211651	Fanconi anemia, complementation group D2 [Source:MGI Symbol;Acc:MGI:2448480]	211651	6	113508643	113573978	q	1
NM_001081383.1	Kmt2c	1926.15	-0.0753406	0.123755	-0.608786	0.542666	0.739937	0.130805	NM_001081383	231051	lysine (K)-specific methyltransferase 2C [Source:MGI Symbol;Acc:MGI:2444959]	231051	5	25476796	25703781	q	-1
NM_010101.3	S1pr3	256.502	0.0781942	0.129024	0.606044	0.544486	0.739992	0.130773	NM_010101	13610	sphingosine-1-phosphate receptor 3 [Source:MGI Symbol;Acc:MGI:1339365]	13610	13	51562675	51576833	q	1
NM_001003953.1	Kdm2b	235.346	-0.0766562	0.126835	-0.604377	0.545593	0.740168	0.13067	NM_001003953	30841	lysine (K)-specific demethylase 2B [Source:MGI Symbol;Acc:MGI:1354737]	30841	5	123008728	123127886	q	-1
NM_023049.1	Asb2	87.1431	-0.0875508	0.149295	-0.586427	0.557588	0.740437	0.130512	NM_023049	65256	ankyrin repeat and SOCS box-containing 2 [Source:MGI Symbol;Acc:MGI:1929743]	65256	12	103287401	103322260	q	-1
NM_021876.3	Eed	1294.33	-0.0415446	0.0689792	-0.602277	0.54699	0.740437	0.130512	NM_021876	13626	embryonic ectoderm development [Source:MGI Symbol;Acc:MGI:95286]	13626	7	89603862	89630191	q	-1
NM_007913.5	Egr1	4515.39	-0.198294	0.338929	-0.585061	0.558506	0.740437	0.130512	NM_007913	13653	early growth response 1 [Source:MGI Symbol;Acc:MGI:95295]	13653	18	34992876	34998037	q	1
NM_029495.2	Epsti1	29.9434	-0.148049	0.250591	-0.590802	0.554653	0.740437	0.130512	NM_029495	108670	epithelial stromal interaction 1 [Source:MGI Symbol;Acc:MGI:1915168]	108670	14	78141679	78240097	q	1
NM_146120.3	Gsn	2760.49	-0.0689698	0.116962	-0.589679	0.555406	0.740437	0.130512	NM_146120	227753	gelsolin [Source:MGI Symbol;Acc:MGI:95851]	227753	2	35146392	35197904	q	1
NM_001083188.1	Lig1	173.947	-0.106252	0.181161	-0.586506	0.557535	0.740437	0.130512	NM_001083188	16881	ligase I, DNA, ATP-dependent [Source:MGI Symbol;Acc:MGI:101789]	16881	7	13011239	13045350	q	1
NM_010758.2	Mag	4355.63	-0.102603	0.174363	-0.588444	0.556234	0.740437	0.130512	NM_010758	17136	myelin-associated glycoprotein [Source:MGI Symbol;Acc:MGI:96912]	17136	7	30598601	30614298	q	-1
NM_001033481.1	Myrf	3755.59	-0.0941823	0.158892	-0.592744	0.553353	0.740437	0.130512	NM_001033481	225908	myelin regulatory factor [Source:MGI Symbol;Acc:MGI:2684944]	225908	19	10185636	10218112	q	-1
NM_008503.5	Rps2	12452.1	-0.0613592	0.102421	-0.59909	0.549113	0.740437	0.130512	NM_008503	16898	ribosomal protein S2 [Source:MGI Symbol;Acc:MGI:105110]	16898	17	24937090	24940903	q	1
NM_182993.2	Slc17a7	2651.07	-0.449375	0.764087	-0.58812	0.556452	0.740437	0.130512	NM_182993	72961	solute carrier family 17 (sodium-dependent inorganic phosphate cotransporter), member 7 [Source:MGI Symbol;Acc:MGI:1920211]	72961	7	44813373	44825566	q	1
NM_175140.4	Chst8	708.208	-0.337064	0.579298	-0.58185	0.560668	0.740708	0.130353	NM_175140	68947	carbohydrate sulfotransferase 8 [Source:MGI Symbol;Acc:MGI:1916197]	68947	7	34373893	34512136	q	-1
NM_011812.4	Fbln5	301.084	-0.106603	0.18314	-0.582083	0.56051	0.740708	0.130353	NM_011812	23876	fibulin 5 [Source:MGI Symbol;Acc:MGI:1346091]	23876	12	101712824	101785314	q	-1
NM_011234.4	Rad51	53.0165	0.101782	0.175619	0.579559	0.562212	0.741454	0.129916	NM_011234	19361	RAD51 recombinase [Source:MGI Symbol;Acc:MGI:97890]	19361	2	118943274	118977926	q	1
NM_007546.2	Bik	21.7873	-0.132303	0.229922	-0.575427	0.565003	0.743838	0.128522	NM_007546	12124	BCL2-interacting killer [Source:MGI Symbol;Acc:MGI:1206591]	12124	15	83411063	83428835	q	1
NM_008567.1	Mcm6	172.329	0.103862	0.181508	0.572216	0.567176	0.744299	0.128253	NM_008567	17219	minichromosome maintenance complex component 6 [Source:MGI Symbol;Acc:MGI:1298227]	17219	1	128259327	128287401	q	-1
NM_001025577.2	Maf	93.1918	0.0948735	0.147352	0.643855	0.519669	0.744934	0.127882	NM_001025577	17132	MAF bZIP transcription factor [Source:MGI Symbol;Acc:MGI:96909]	17132	8	116409681	116434533	q	-1
NM_021461.5	Mknk1	175.992	-0.0669199	0.103897	-0.644097	0.519513	0.744934	0.127882	NM_021461	17346	MAP kinase-interacting serine/threonine kinase 1 [Source:MGI Symbol;Acc:MGI:894316]	17346	4	115696395	115736447	q	1
NM_011632.3	Traf3	547.577	-0.0923757	0.143032	-0.64584	0.518383	0.744934	0.127882	NM_011632	22031	TNF receptor-associated factor 3 [Source:MGI Symbol;Acc:MGI:108041]	22031	12	111132804	111233587	q	1
NM_011589.1	Timeless	156.931	-0.084261	0.148588	-0.567079	0.570661	0.747388	0.126454	NM_011589	21853	timeless circadian clock 1 [Source:MGI Symbol;Acc:MGI:1321393]	21853	10	128067934	128088810	q	1
NM_010045.2	Ackr1	1343.61	-0.0722858	0.114422	-0.631748	0.527552	0.751448	0.124101	NM_010045	13349	atypical chemokine receptor 1 (Duffy blood group) [Source:MGI Symbol;Acc:MGI:1097689]	13349	1	173159453	173161317	q	-1
NM_001033238.1	Cblb	812.372	-0.0723546	0.114997	-0.629185	0.529228	0.751448	0.124101	NM_001033238	208650	Casitas B-lineage lymphoma b [Source:MGI Symbol;Acc:MGI:2146430]	208650	16	51851588	52028411	q	1
NM_010508.1	Ifnar1	1924.44	-0.034681	0.0552023	-0.628253	0.529838	0.751448	0.124101	NM_010508	15975	interferon (alpha and beta) receptor 1 [Source:MGI Symbol;Acc:MGI:107658]	15975	16	91282126	91304329	q	1
NM_008354.3	Il12rb2	24.0092	-0.139882	0.221915	-0.630342	0.528471	0.751448	0.124101	NM_008354	16162	interleukin 12 receptor, beta 2 [Source:MGI Symbol;Acc:MGI:1270861]	16162	6	67268302	67353172	q	-1
NM_010531.1	Il18bp	475.989	-0.0785295	0.124078	-0.632906	0.526795	0.751448	0.124101	NM_010531	16068	interleukin 18 binding protein [Source:MGI Symbol;Acc:MGI:1333800]	16068	7	101664092	101667897	q	-1
NM_015729.2	Acox1	5642.59	-0.0502625	0.0807984	-0.622073	0.533894	0.752407	0.123547	NM_015729	11430	acyl-Coenzyme A oxidase 1, palmitoyl [Source:MGI Symbol;Acc:MGI:1330812]	11430	11	116062714	116089871	q	-1
NM_011785.3	Akt3	6685.02	-0.0632414	0.10145	-0.623372	0.53304	0.752407	0.123547	NM_011785	23797	thymoma viral proto-oncogene 3 [Source:MGI Symbol;Acc:MGI:1345147]	23797	1	176847639	177085769	q	-1
NM_010388.4	H2-DMb2	85.0235	0.134861	0.216465	0.623015	0.533275	0.752407	0.123547	NM_010388	15000	histocompatibility 2, class II, locus Mb2 [Source:MGI Symbol;Acc:MGI:95923]	15000	17	34362281	34370529	q	1
NM_013822.2	Jag1	268.078	0.103977	0.186321	0.558051	0.57681	0.752836	0.1233	NM_013822	16449	jagged 1 [Source:MGI Symbol;Acc:MGI:1095416]	16449	2	136923376	136958564	q	-1
NM_054098.3	Steap4	25.4424	0.137064	0.245536	0.558226	0.57669	0.752836	0.1233	NM_054098	117167	STEAP family member 4 [Source:MGI Symbol;Acc:MGI:1923560]	117167	5	8010457	8032213	q	1
NM_033217.3	Ngfr	185.871	-0.215122	0.388041	-0.554379	0.57932	0.754811	0.122162	NM_033217	18053	nerve growth factor receptor (TNFR superfamily, member 16) [Source:MGI Symbol;Acc:MGI:97323]	18053	11	95459644	95478561	q	-1
NM_133915.3	Pxn	145.873	0.0821854	0.133507	0.615587	0.538167	0.756833	0.121	NM_133915	19303	paxillin [Source:MGI Symbol;Acc:MGI:108295]	19303	5	115644735	115694046	q	1
NM_001159652.1	Gpr62	912.444	-0.0789773	0.143937	-0.548692	0.583217	0.757281	0.120743	NM_001159652	436090	G protein-coupled receptor 62 [Source:MGI Symbol;Acc:MGI:3525078]	436090	9	106341161	106343137	q	-1
NM_001161746.1	Tnfrsf12a	693.967	0.199848	0.363871	0.549229	0.582849	0.757281	0.120743	NM_001161746	27279	tumor necrosis factor receptor superfamily, member 12a [Source:MGI Symbol;Acc:MGI:1351484]	27279	17	23894419	23896442	q	-1
NM_001038642.1	Ets1	594.389	0.0415653	0.0681068	0.610295	0.541666	0.760153	0.119099	NM_001038642	23871	E26 avian leukemia oncogene 1, 5' domain [Source:MGI Symbol;Acc:MGI:95455]	23871	9	32547517	32669116	q	1
NM_010391.4	H2-Q10	25.3861	0.129682	0.214626	0.604226	0.545693	0.761183	0.118511	NM_010391	15007	histocompatibility 2, Q region locus 10 [Source:MGI Symbol;Acc:MGI:95929]	15007	17	35780986	35785460	q	1
NM_194346.2	Rnf31	408.806	-0.0722183	0.119559	-0.604038	0.545818	0.761183	0.118511	NM_194346	268749	ring finger protein 31 [Source:MGI Symbol;Acc:MGI:1934704]	268749	14	55829165	55841150	q	1
NM_133945.1	Vrk3	201.823	-0.0691245	0.114035	-0.606166	0.544404	0.761183	0.118511	NM_133945	101568	vaccinia related kinase 3 [Source:MGI Symbol;Acc:MGI:2182465]	101568	7	44397837	44426939	q	1
NM_009137.2	Ccl22	28.7715	0.132377	0.220569	0.60016	0.548399	0.763189	0.117368	NM_009137	20299	C-C motif chemokine ligand 22 [Source:MGI Symbol;Acc:MGI:1306779]	20299	8	95472218	95478327	q	1
NM_011925.1	Adgre5	195.996	-0.0782489	0.131116	-0.596791	0.550647	0.764724	0.116496	NM_011925	26364	adhesion G protein-coupled receptor E5 [Source:MGI Symbol;Acc:MGI:1347095]	26364	8	84449880	84467955	q	-1
NM_008927.3	Map2k1	9090.8	-0.0808064	0.150538	-0.536785	0.591416	0.765303	0.116167	NM_008927	26395	mitogen-activated protein kinase kinase 1 [Source:MGI Symbol;Acc:MGI:1346866]	26395	9	64093052	64160913	q	-1
NM_029688.4	Srxn1	2358.85	-0.0937773	0.17583	-0.533342	0.593797	0.765765	0.115904	NM_029688	76650	sulfiredoxin 1 homolog (S. cerevisiae) [Source:MGI Symbol;Acc:MGI:104971]	76650	2	151947436	151953296	q	1
NM_013697.4	Ttr	132.421	-0.194407	0.364321	-0.533614	0.593608	0.765765	0.115904	NM_013697	22139	transthyretin [Source:MGI Symbol;Acc:MGI:98865]	22139	18	20798337	20807378	q	1
NM_009764.3	Brca1	59.5314	-0.0947438	0.179291	-0.528435	0.597197	0.766309	0.115596	NM_009764	12189	breast cancer 1, early onset [Source:MGI Symbol;Acc:MGI:104537]	12189	11	101379590	101442781	q	-1
NM_013805.4	Cldn5	2248.8	-0.0862842	0.162438	-0.531182	0.595293	0.766309	0.115596	NM_013805	12741	claudin 5 [Source:MGI Symbol;Acc:MGI:1276112]	12741	16	18595597	18597012	q	1
NM_011451.3	Sphk1	22.6213	0.140279	0.265504	0.528351	0.597256	0.766309	0.115596	NM_011451	NA	NA	NA	NA	NA	NA	NA	NA
NM_013521.2	Fpr1	25.0623	0.141311	0.239865	0.589128	0.555776	0.76865	0.114271	NM_013521	14293	formyl peptide receptor 1 [Source:MGI Symbol;Acc:MGI:107443]	14293	17	18096733	18104202	q	-1
NM_001164059.1	Sell	27.7165	0.137717	0.233701	0.589287	0.555669	0.76865	0.114271	NM_001164059	20343	selectin, lymphocyte [Source:MGI Symbol;Acc:MGI:98279]	20343	1	163889551	163911750	q	1
NM_007997.1	Fdxr	70.1607	0.0823343	0.159898	0.514917	0.606611	0.775231	0.110569	NM_007997	14149	ferredoxin reductase [Source:MGI Symbol;Acc:MGI:104724]	14149	11	115158850	115167876	q	-1
NM_001024931.2	Rbfox3	5377.66	-0.0813422	0.158652	-0.512708	0.608155	0.775231	0.110569	NM_001024931	52897	RNA binding protein, fox-1 homolog (C. elegans) 3 [Source:MGI Symbol;Acc:MGI:106368]	52897	11	118380588	118802423	q	-1
NM_021406.5	Trem1	26.0116	0.125276	0.242961	0.515623	0.606118	0.775231	0.110569	NM_021406	58217	triggering receptor expressed on myeloid cells 1 [Source:MGI Symbol;Acc:MGI:1930005]	58217	17	48539796	48553952	q	1
NM_183180.2	Tspan18	44.4413	-0.153509	0.299533	-0.512494	0.608306	0.775231	0.110569	NM_183180	241556	tetraspanin 18 [Source:MGI Symbol;Acc:MGI:1917186]	241556	2	93032105	93164850	q	-1
NM_010053.1	Dlx1	544.52	-0.227663	0.446151	-0.510282	0.609854	0.775898	0.110195	NM_010053	13390	distal-less homeobox 1 [Source:MGI Symbol;Acc:MGI:94901]	13390	2	71358457	71364325	q	1
NM_197889.2	Ifnz	94.3158	-0.324822	0.561287	-0.578708	0.562786	0.776377	0.109928	NM_197889	319146	interferon zeta [Source:MGI Symbol;Acc:MGI:2448469]	319146	4	88700368	88701829	q	1
NM_009169.1	Sem1	3369.78	-0.0411413	0.0712559	-0.577374	0.563687	0.776377	0.109928	NM_009169	20422	SEM1, 26S proteasome complex subunit [Source:MGI Symbol;Acc:MGI:109238]	20422	6	6557294	6578663	q	-1
NM_008928.5	Map2k3	156.91	-0.0848126	0.148698	-0.570368	0.568428	0.778094	0.108968	NM_008928	26397	mitogen-activated protein kinase kinase 3 [Source:MGI Symbol;Acc:MGI:1346868]	26397	11	60822859	60843637	q	1
NM_145857.2	Nod2	54.8288	0.137163	0.239903	0.571745	0.567494	0.778094	0.108968	NM_145857	257632	nucleotide-binding oligomerization domain containing 2 [Source:MGI Symbol;Acc:MGI:2429397]	257632	8	89373943	89415102	q	1
NM_001291020.1	Sirpa	6139.99	-0.0657159	0.114666	-0.573107	0.566572	0.778094	0.108968	NM_001291020	19261	signal-regulatory protein alpha [Source:MGI Symbol;Acc:MGI:108563]	19261	2	129434755	129474148	q	1
NM_023118.2	Dab2	122.201	0.138557	0.274639	0.504508	0.613904	0.779423	0.108227	NM_023118	13132	disabled 2, mitogen-responsive phosphoprotein [Source:MGI Symbol;Acc:MGI:109175]	13132	15	6329269	6470193	q	1
XM_128139.6	Sox10	1770.33	-0.0700153	0.139085	-0.503399	0.614684	0.779423	0.108227	XM_128139	NA	NA	NA	NA	NA	NA	NA	NA
NM_001013370.2	Sesn1	1732.13	-0.0543374	0.108938	-0.498791	0.617927	0.780919	0.107394	NM_001013370	140742	sestrin 1 [Source:MGI Symbol;Acc:MGI:2155278]	140742	10	41685931	41784420	q	1
NM_009498.4	Vamp3	1205.76	0.0450992	0.0797598	0.565438	0.571776	0.781076	0.107307	NM_009498	22319	vesicle-associated membrane protein 3 [Source:MGI Symbol;Acc:MGI:1321389]	22319	4	151131757	151142420	q	-1
NM_007548.3	Prdm1	27.6204	0.129932	0.23168	0.560825	0.574917	0.782168	0.1067	NM_007548	12142	PR domain containing 1, with ZNF domain [Source:MGI Symbol;Acc:MGI:99655]	12142	10	44313173	44404497	q	-1
NM_001164041.1	Smad5	1056.26	-0.0602023	0.1073	-0.561066	0.574753	0.782168	0.1067	NM_001164041	17129	SMAD family member 5 [Source:MGI Symbol;Acc:MGI:1328787]	17129	13	56850823	56890190	q	1
NM_009894.3	Cideb	232.356	-0.0838671	0.17089	-0.490767	0.623591	0.785455	0.104879	NM_009894	12684	cell death-inducing DNA fragmentation factor, alpha subunit-like effector B [Source:MGI Symbol;Acc:MGI:1270844]	12684	14	55991507	55995915	q	-1
NM_007611.2	Casp7	206.649	0.0522239	0.108245	0.482462	0.629478	0.786608	0.104241	NM_007611	12369	caspase 7 [Source:MGI Symbol;Acc:MGI:109383]	12369	19	56385561	56430776	q	1
NM_181850.2	Grm3	6172.26	-0.067925	0.140419	-0.48373	0.628577	0.786608	0.104241	NM_181850	108069	glutamate receptor, metabotropic 3 [Source:MGI Symbol;Acc:MGI:1351340]	108069	5	9535541	9775170	q	-1
NM_024459.2	Ppp3r1	10002.2	-0.0768232	0.159318	-0.4822	0.629664	0.786608	0.104241	NM_024459	19058	protein phosphatase 3, regulatory subunit B, alpha isoform (calcineurin B, type I) [Source:MGI Symbol;Acc:MGI:107172]	19058	11	17109263	17150375	q	1
NM_027495.4	Tmem144	476.752	-0.0794276	0.164738	-0.482146	0.629702	0.786608	0.104241	NM_027495	70652	transmembrane protein 144 [Source:MGI Symbol;Acc:MGI:1917902]	70652	3	79719871	79760080	q	-1
NM_007598.5	Cap1	9251.16	0.0877344	0.158707	0.552809	0.580394	0.786828	0.10412	NM_007598	12331	cyclase associated actin cytoskeleton regulatory protein 1 [Source:MGI Symbol;Acc:MGI:88262]	12331	4	122752840	122779849	q	-1
NM_008504.2	Gzmm	48.6275	-0.0967025	0.17507	-0.552366	0.580698	0.786828	0.10412	NM_008504	16904	granzyme M (lymphocyte met-ase 1) [Source:MGI Symbol;Acc:MGI:99549]	16904	10	79524854	79531095	q	1
NM_009793.3	Camk4	5052.81	0.113661	0.239241	0.475092	0.634721	0.79027	0.102225	NM_009793	12326	calcium/calmodulin-dependent protein kinase IV [Source:MGI Symbol;Acc:MGI:88258]	12326	18	33067984	33324281	q	1
NM_011261.2	Reln	1125.83	0.181671	0.384264	0.472776	0.636373	0.791025	0.10181	NM_011261	19699	reelin [Source:MGI Symbol;Acc:MGI:103022]	19699	5	22089452	22549700	q	-1
NM_001081304.1	Atf6	1849.16	0.0777464	0.142957	0.543846	0.586547	0.791179	0.101725	NM_001081304	226641	activating transcription factor 6 [Source:MGI Symbol;Acc:MGI:1926157]	226641	1	170532243	170695340	q	-1
NM_008357.2	Il15	47.6912	0.110322	0.203353	0.542517	0.587463	0.791179	0.101725	NM_008357	16168	interleukin 15 [Source:MGI Symbol;Acc:MGI:103014]	16168	8	83058261	83129851	q	-1
NM_133500.1	Ntng2	422.41	-0.100244	0.183887	-0.545141	0.585657	0.791179	0.101725	NM_133500	171171	netrin G2 [Source:MGI Symbol;Acc:MGI:2159341]	171171	2	29084553	29143017	q	-1
NM_177748.2	Kir3dl2	23.4258	-0.119691	0.255194	-0.469022	0.639054	0.793056	0.100696	NM_177748	245615	killer cell immunoglobulin-like receptor, three domains, long cytoplasmic tail, 2 [Source:MGI Symbol;Acc:MGI:3612791]	245615	X	135348856	135444805	q	-1
NM_011103.2	Prkcd	19979	-0.36516	0.678005	-0.53858	0.590177	0.793235	0.100598	NM_011103	18753	protein kinase C, delta [Source:MGI Symbol;Acc:MGI:97598]	18753	14	30317311	30348167	q	-1
NM_001271566.1	Cdc7	304.163	-0.0882221	0.189637	-0.465215	0.641778	0.795132	0.0995608	NM_001271566	12545	cell division cycle 7 [Source:MGI Symbol;Acc:MGI:1309511]	12545	5	107112188	107132298	q	1
NM_008689.2	Nfkb1	541.101	0.0372076	0.069928	0.532084	0.594668	0.797667	0.0981785	NM_008689	18033	nuclear factor of kappa light polypeptide gene enhancer in B cells 1, p105 [Source:MGI Symbol;Acc:MGI:97312]	18033	3	135290416	135397308	q	-1
NM_134103.2	Il1rap	2244.83	-0.09119	0.172078	-0.529934	0.596158	0.798063	0.0979627	NM_134103	16180	interleukin 1 receptor accessory protein [Source:MGI Symbol;Acc:MGI:104975]	16180	16	26400454	26548867	q	1
NM_010822.3	Mpg	91.0954	-0.0658903	0.144815	-0.454998	0.649111	0.800288	0.0967538	NM_010822	268395	N-methylpurine-DNA glycosylase [Source:MGI Symbol;Acc:MGI:97073]	268395	11	32176505	32182700	q	1
NM_009012.2	Rad50	195.712	-0.0543161	0.119028	-0.456329	0.648153	0.800288	0.0967538	NM_009012	19360	RAD50 double strand break repair protein [Source:MGI Symbol;Acc:MGI:109292]	19360	11	53540346	53598146	q	-1
NM_012012.4	Exo1	20.596	-0.103872	0.232445	-0.446869	0.65497	0.804973	0.0942187	NM_012012	26909	exonuclease 1 [Source:MGI Symbol;Acc:MGI:1349427]	26909	1	175708147	175741055	q	1
NM_018729.2	Cd244	22.2505	0.099382	0.22822	0.435465	0.663225	0.808713	0.0922055	NM_018729	18106	CD244 molecule A [Source:MGI Symbol;Acc:MGI:109294]	18106	1	171386761	171437314	q	1
NM_011123.2	Plp1	114938	0.0655881	0.148783	0.440831	0.659336	0.808713	0.0922055	NM_011123	18823	proteolipid protein (myelin) 1 [Source:MGI Symbol;Acc:MGI:97623]	18823	X	135723420	135740482	q	1
NM_016802.4	Rhoa	5146.76	-0.0281149	0.0646033	-0.435193	0.663422	0.808713	0.0922055	NM_016802	11848	ras homolog family member A [Source:MGI Symbol;Acc:MGI:1096342]	11848	9	108183328	108215133	q	1
NM_009104.1	Rrm2	86.0795	0.117672	0.269891	0.436	0.662837	0.808713	0.0922055	NM_009104	20135	ribonucleotide reductase M2 [Source:MGI Symbol;Acc:MGI:98181]	20135	12	24758240	24764145	q	1
NM_029815.2	Bcas1	14616.7	-0.0758104	0.175489	-0.431995	0.665745	0.808939	0.0920843	NM_029815	76960	brain enriched myelin associated protein 1 [Source:MGI Symbol;Acc:MGI:1924210]	76960	2	170188911	170269765	q	-1
NM_008706.5	Nqo1	275.288	-0.0385744	0.0891422	-0.432728	0.665212	0.808939	0.0920843	NM_008706	18104	NAD(P)H dehydrogenase, quinone 1 [Source:MGI Symbol;Acc:MGI:103187]	18104	8	108114857	108129838	q	-1
NM_024207.4	Derl1	1631.08	-0.0307865	0.0597173	-0.515537	0.606178	0.809854	0.0915933	NM_024207	67819	Der1-like domain family, member 1 [Source:MGI Symbol;Acc:MGI:1915069]	67819	15	57732898	57755844	q	-1
NM_007642.4	Cd28	28.4269	0.128448	0.250567	0.512628	0.608212	0.810949	0.0910065	NM_007642	12487	CD28 antigen [Source:MGI Symbol;Acc:MGI:88327]	12487	1	60755959	60812518	q	1
NM_145856.2	Il17f	22.4122	0.118842	0.233123	0.509783	0.610203	0.811984	0.0904526	NM_145856	257630	interleukin 17F [Source:MGI Symbol;Acc:MGI:2676631]	257630	1	20847370	20860841	q	-1
NM_008353.2	Il12rb1	20.8004	-0.113076	0.223664	-0.505561	0.613165	0.814303	0.0892141	NM_008353	16161	interleukin 12 receptor, beta 1 [Source:MGI Symbol;Acc:MGI:104579]	16161	8	71261093	71274068	q	1
NM_011073.2	Prf1	24.1375	0.117935	0.235855	0.500031	0.617053	0.81784	0.0873316	NM_011073	18646	perforin 1 (pore forming protein) [Source:MGI Symbol;Acc:MGI:97551]	18646	10	61133612	61140459	q	1
NM_001038695.2	Kdm3a	1313.07	0.0710831	0.170405	0.417142	0.676574	0.820662	0.0858356	NM_001038695	104263	lysine (K)-specific demethylase 3A [Source:MGI Symbol;Acc:MGI:98847]	104263	6	71565956	71609974	q	-1
NM_178029.3	Setd1a	1186.07	-0.047907	0.115218	-0.415793	0.677561	0.820662	0.0858356	NM_178029	233904	SET domain containing 1A [Source:MGI Symbol;Acc:MGI:2446244]	233904	7	127375842	127399294	q	1
NM_007619.2	Cbl	680.738	-0.0491936	0.101087	-0.486647	0.626509	0.823834	0.08416	NM_007619	12402	Casitas B-lineage lymphoma [Source:MGI Symbol;Acc:MGI:88279]	12402	9	44054273	44145346	q	-1
NM_010439.4	Hmgb1	5447.93	-0.0482854	0.0987292	-0.48907	0.624792	0.823834	0.08416	NM_010439	15289	high mobility group box 1 [Source:MGI Symbol;Acc:MGI:96113]	15289	5	148983512	149121299	q	-1
NM_011636.2	Plscr1	193.917	0.06186	0.126808	0.487824	0.625675	0.823834	0.08416	NM_011636	22038	phospholipid scramblase 1 [Source:MGI Symbol;Acc:MGI:893575]	22038	9	92131803	92154331	q	1
NM_133685.2	Rab31	3571.15	0.0492285	0.100428	0.490185	0.624003	0.823834	0.08416	NM_133685	106572	RAB31, member RAS oncogene family [Source:MGI Symbol;Acc:MGI:1914603]	106572	17	65958724	66079747	q	-1
NM_001110204.1	Acvr1	625.965	-0.0512608	0.107378	-0.477387	0.633086	0.825715	0.0831701	NM_001110204	11477	activin A receptor, type 1 [Source:MGI Symbol;Acc:MGI:87911]	11477	2	58278656	58457169	q	-1
NM_001042564.1	Cd27	21.4351	-0.106237	0.227352	-0.46728	0.6403	0.825715	0.0831701	NM_001042564	21940	CD27 antigen [Source:MGI Symbol;Acc:MGI:88326]	21940	6	125209585	125213973	q	-1
NM_001111060.2	Cd59a	629.675	-0.101574	0.214032	-0.474574	0.635091	0.825715	0.0831701	NM_001111060	12509	CD59a antigen [Source:MGI Symbol;Acc:MGI:109177]	12509	2	103926146	103945699	q	1
NM_021704.3	Cxcl12	1990.54	0.0518288	0.108678	0.4769	0.633433	0.825715	0.0831701	NM_021704	20315	C-X-C motif chemokine ligand 12 [Source:MGI Symbol;Acc:MGI:103556]	20315	6	117145496	117158328	q	1
XM_006517307.1	Cxcl14	2817.42	-0.0423056	0.0903267	-0.468362	0.639526	0.825715	0.0831701	XM_006517307	NA	NA	NA	NA	NA	NA	NA	NA
NM_145523.3	Gca	700.988	0.0364541	0.0769459	0.473763	0.635669	0.825715	0.0831701	NM_145523	227960	grancalcin [Source:MGI Symbol;Acc:MGI:1918521]	227960	2	62494629	62524453	q	1
NM_001005421.4	Jaml	35.6263	-0.128474	0.268987	-0.477622	0.632919	0.825715	0.0831701	NM_001005421	270152	junction adhesion molecule like [Source:MGI Symbol;Acc:MGI:2685484]	270152	9	44990481	45019832	q	1
NM_025730.3	Lrrk2	1953.6	0.109693	0.2339	0.468972	0.63909	0.825715	0.0831701	NM_025730	66725	leucine-rich repeat kinase 2 [Source:MGI Symbol;Acc:MGI:1913975]	66725	15	91557378	91700323	q	1
NM_010901.2	Nfatc3	345.652	-0.0546419	0.115791	-0.4719	0.636998	0.825715	0.0831701	NM_010901	18021	nuclear factor of activated T cells, cytoplasmic, calcineurin dependent 3 [Source:MGI Symbol;Acc:MGI:103296]	18021	8	106785472	106857169	q	1
NM_011851.3	Nt5e	254.7	0.0989855	0.210739	0.469706	0.638565	0.825715	0.0831701	NM_011851	23959	5' nucleotidase, ecto [Source:MGI Symbol;Acc:MGI:99782]	23959	9	88209250	88254145	q	1
NM_008171.3	Grin2b	6281.9	-0.039134	0.0975719	-0.401078	0.688363	0.828235	0.0818464	NM_008171	14812	glutamate receptor, ionotropic, NMDA2B (epsilon 2) [Source:MGI Symbol;Acc:MGI:95821]	14812	6	135690231	136150509	q	-1
NM_031199.2	Tgfa	1756.8	0.105552	0.263993	0.399827	0.689284	0.828235	0.0818464	NM_031199	21802	transforming growth factor alpha [Source:MGI Symbol;Acc:MGI:98724]	21802	6	86172205	86252701	q	1
NM_001081256.1	Kdm3b	30.7305	-0.0895949	0.226698	-0.395217	0.692683	0.828374	0.0817735	NM_001081256	277250	KDM3B lysine (K)-specific demethylase 3B [Source:MGI Symbol;Acc:MGI:1923356]	277250	18	34910100	34971713	q	1
NM_013668.3	Kdm5c	2342.4	-0.062647	0.158302	-0.395744	0.692294	0.828374	0.0817735	NM_013668	20591	lysine demethylase 5C [Source:MGI Symbol;Acc:MGI:99781]	20591	X	151016016	151057531	q	1
NM_001010833.2	Mdc1	464.254	-0.0418796	0.10545	-0.397149	0.691258	0.828374	0.0817735	NM_001010833	240087	mediator of DNA damage checkpoint 1 [Source:MGI Symbol;Acc:MGI:3525201]	240087	17	36152407	36170562	q	1
NM_008358.2	Il15ra	135.259	-0.0794505	0.172027	-0.461848	0.64419	0.829131	0.0813769	NM_008358	16169	interleukin 15 receptor, alpha chain [Source:MGI Symbol;Acc:MGI:104644]	16169	2	11710101	11739128	q	1
NM_015766.2	Ebi3	25.3137	0.104415	0.228196	0.457569	0.647262	0.831482	0.0801469	NM_015766	50498	Epstein-Barr virus induced gene 3 [Source:MGI Symbol;Acc:MGI:1354171]	50498	17	56259640	56264022	q	1
NM_011882.2	Rnasel	140.673	-0.0794182	0.174712	-0.454565	0.649422	0.832656	0.0795343	NM_011882	24014	ribonuclease L (2', 5'-oligoisoadenylate synthetase-dependent) [Source:MGI Symbol;Acc:MGI:1098272]	24014	1	153625172	153639967	q	1
NM_001033420.2	Dock1	1508.69	-0.0403981	0.104452	-0.386761	0.698933	0.834531	0.0785575	NM_001033420	330662	dedicator of cytokinesis 1 [Source:MGI Symbol;Acc:MGI:2429765]	330662	7	134272383	134775368	q	1
NM_019777.3	Ikbke	46.6721	0.113468	0.253328	0.447911	0.654217	0.835597	0.0780031	NM_019777	56489	inhibitor of kappaB kinase epsilon [Source:MGI Symbol;Acc:MGI:1929612]	56489	1	131182080	131207344	q	-1
NM_001348246.1	Selenos	664.27	-0.0335048	0.0747668	-0.448124	0.654063	0.835597	0.0780031	NM_001348246	109815	selenoprotein S [Source:MGI Symbol;Acc:MGI:95994]	109815	7	65729397	65739153	q	1
NM_145133.3	Tifa	382.147	-0.0762644	0.171448	-0.444824	0.656447	0.836844	0.0773553	NM_145133	211550	TRAF-interacting protein with forkhead-associated domain [Source:MGI Symbol;Acc:MGI:2182965]	211550	3	127583454	127625813	q	1
NM_170702.2	Cd40	34.9894	0.0868879	0.196934	0.441204	0.659065	0.836988	0.0772809	NM_170702	21939	CD40 antigen [Source:MGI Symbol;Acc:MGI:88336]	21939	2	164897547	164914868	q	1
NM_030712.4	Cxcr6	20.7164	-0.0990742	0.223884	-0.442524	0.65811	0.836988	0.0772809	NM_030712	80901	C-X-C motif chemokine receptor 6 [Source:MGI Symbol;Acc:MGI:1934582]	80901	9	123635540	123640825	q	1
NM_008598.2	Mgmt	84.7676	0.0499122	0.130771	0.381676	0.702702	0.837709	0.0769067	NM_008598	17314	O-6-methylguanine-DNA methyltransferase [Source:MGI Symbol;Acc:MGI:96977]	17314	7	136496343	136731995	q	1
NM_007800.1	Ctsg	31.3856	-0.104028	0.239179	-0.434939	0.663607	0.839563	0.0759466	NM_007800	13035	cathepsin G [Source:MGI Symbol;Acc:MGI:88563]	13035	14	56337338	56340031	q	-1
NM_008143.3	Rack1	3875.55	-0.0243887	0.0558622	-0.436587	0.662411	0.839563	0.0759466	NM_008143	14694	receptor for activated C kinase 1 [Source:MGI Symbol;Acc:MGI:101849]	14694	11	48691159	48697261	q	1
NM_021282.2	Cyp2e1	25.6778	-0.114775	0.26627	-0.431047	0.666434	0.839959	0.075742	NM_021282	13106	cytochrome P450, family 2, subfamily e, polypeptide 1 [Source:MGI Symbol;Acc:MGI:88607]	13106	7	140343652	140354900	q	1
NM_021524.1	Nampt	1711.34	0.0347546	0.0803285	0.432656	0.665265	0.839959	0.075742	NM_021524	59027	nicotinamide phosphoribosyltransferase [Source:MGI Symbol;Acc:MGI:1929865]	59027	12	32869544	32903348	q	1
NM_007971.2	Ezh2	1065.43	0.0632968	0.169337	0.373792	0.708559	0.840299	0.0755663	NM_007971	14056	enhancer of zeste 2 polycomb repressive complex 2 subunit [Source:MGI Symbol;Acc:MGI:107940]	14056	6	47507073	47572275	q	-1
NM_018736.2	Mre11a	673.847	-0.0467702	0.125464	-0.372777	0.709314	0.840299	0.0755663	NM_018736	17535	MRE11A homolog A, double strand break repair nuclease [Source:MGI Symbol;Acc:MGI:1100512]	17535	9	14695950	14748419	q	1
NM_008913.4	Ppp3ca	27612.1	0.0933483	0.248841	0.375132	0.707562	0.840299	0.0755663	NM_008913	19055	protein phosphatase 3, catalytic subunit, alpha isoform [Source:MGI Symbol;Acc:MGI:107164]	19055	3	136375885	136643488	q	1
NM_173378.2	Trp53bp2	1045.18	-0.0327746	0.0873838	-0.375065	0.707612	0.840299	0.0755663	NM_173378	209456	transformation related protein 53 binding protein 2 [Source:MGI Symbol;Acc:MGI:2138319]	209456	1	182236737	182289997	q	1
NM_001271018.1	Calcoco2	21.7847	-0.0860859	0.233754	-0.368275	0.712668	0.840326	0.075552	NM_001271018	76815	calcium binding and coiled-coil domain 2 [Source:MGI Symbol;Acc:MGI:1343177]	76815	11	95990152	96002790	q	-1
NM_008170.2	Grin2a	550.924	-0.0556294	0.149844	-0.371248	0.710453	0.840326	0.075552	NM_008170	14811	glutamate receptor, ionotropic, NMDA2A (epsilon 1) [Source:MGI Symbol;Acc:MGI:95820]	14811	16	9385762	9813424	q	-1
NM_172132.1	Kdm4b	1712.4	-0.0535243	0.145209	-0.368602	0.712425	0.840326	0.075552	NM_172132	193796	lysine (K)-specific demethylase 4B [Source:MGI Symbol;Acc:MGI:2442355]	193796	17	56633062	56709870	q	1
NM_007799.3	Ctse	24.922	0.0817765	0.223488	0.36591	0.714432	0.841096	0.0751543	NM_007799	13034	cathepsin E [Source:MGI Symbol;Acc:MGI:107361]	13034	1	131566044	131603243	q	1
NM_001080928.1	Rbpj	893.558	-0.0360322	0.0843081	-0.427387	0.669097	0.841727	0.0748287	NM_001080928	19664	recombination signal binding protein for immunoglobulin kappa J region [Source:MGI Symbol;Acc:MGI:96522]	19664	5	53623494	53814704	q	1
NM_009421.3	Traf1	60.7754	-0.101305	0.281604	-0.359744	0.719039	0.845205	0.0730378	NM_009421	22029	TNF receptor-associated factor 1 [Source:MGI Symbol;Acc:MGI:101836]	22029	2	34831762	34851784	q	-1
NM_007753.2	Cpa3	23.7414	0.0969622	0.231397	0.419029	0.675195	0.847801	0.0717058	NM_007753	12873	carboxypeptidase A3, mast cell [Source:MGI Symbol;Acc:MGI:88479]	12873	3	20269784	20296345	q	-1
NM_207655.2	Egfr	264.552	0.0362872	0.102151	0.355232	0.722416	0.847858	0.0716768	NM_207655	13649	epidermal growth factor receptor [Source:MGI Symbol;Acc:MGI:95294]	13649	11	16702203	16868158	q	1
NM_001037177.1	Nfatc2	655.454	-0.079417	0.191317	-0.415108	0.678063	0.848214	0.0714947	NM_001037177	18019	nuclear factor of activated T cells, cytoplasmic, calcineurin dependent 2 [Source:MGI Symbol;Acc:MGI:102463]	18019	2	168318330	168443577	q	-1
NM_001177845.1	Tirap	68.8929	-0.0640404	0.154012	-0.415815	0.677546	0.848214	0.0714947	NM_001177845	117149	toll-interleukin 1 receptor (TIR) domain-containing adaptor protein [Source:MGI Symbol;Acc:MGI:2152213]	117149	9	35095847	35111587	q	-1
NM_009598.1	Ace	493.974	0.12875	0.31493	0.408822	0.682671	0.848643	0.0712751	NM_009598	11421	angiotensin I converting enzyme [Source:MGI Symbol;Acc:MGI:87874]	11421	11	105858771	105880790	q	1
NM_001199960.1	Ccl27a/b	205.227	-0.0650549	0.159076	-0.408956	0.682572	0.848643	0.0712751	NM_001199960	NA	NA	NA	NA	NA	NA	NA	NA
NM_001044751.1	Hsd11b1	1263.76	-0.123185	0.302141	-0.407708	0.683488	0.848643	0.0712751	NM_001044751	15483	hydroxysteroid 11-beta dehydrogenase 1 [Source:MGI Symbol;Acc:MGI:103562]	15483	1	192903942	192946383	q	-1
NM_144548.1	Il23r	28.2277	0.105367	0.256597	0.410631	0.681343	0.848643	0.0712751	NM_144548	209590	interleukin 23 receptor [Source:MGI Symbol;Acc:MGI:2181693]	209590	6	67399916	67468839	q	-1
NM_016904.1	Cks1b	168.899	0.0581633	0.16757	0.3471	0.728517	0.850851	0.0701463	NM_016904	54124	CDC28 protein kinase 1b [Source:MGI Symbol;Acc:MGI:1889208]	54124	3	89322779	89325690	q	-1
NM_009115.3	S100b	5650.89	-0.0638933	0.185477	-0.34448	0.730485	0.850851	0.0701463	NM_009115	20203	S100 protein, beta polypeptide, neural [Source:MGI Symbol;Acc:MGI:98217]	20203	10	76089687	76096993	q	1
NM_011448.4	Sox9	1172.83	0.0484176	0.140607	0.344347	0.730586	0.850851	0.0701463	NM_011448	20682	SRY (sex determining region Y)-box 9 [Source:MGI Symbol;Acc:MGI:98371]	20682	11	112673050	112678586	q	1
NM_009911.3	Cxcr4	126.503	0.137403	0.340827	0.403144	0.686842	0.851225	0.0699555	NM_009911	12767	C-X-C motif chemokine receptor 4 [Source:MGI Symbol;Acc:MGI:109563]	12767	1	128515936	128520030	q	-1
NM_020279.3	Ccl28	35.8806	-0.130179	0.327136	-0.397935	0.690678	0.8541	0.0684912	NM_020279	56838	C-C motif chemokine ligand 28 [Source:MGI Symbol;Acc:MGI:1861731]	56838	13	120085355	120115895	q	1
NM_009985.4	Ctsw	24.9537	0.0916014	0.231011	0.396523	0.691719	0.8541	0.0684912	NM_009985	13041	cathepsin W [Source:MGI Symbol;Acc:MGI:1338045]	13041	19	5515071	5518535	q	-1
NM_019587.2	Plxnb3	974.637	0.0527719	0.155934	0.338425	0.735043	0.854728	0.0681722	NM_019587	140571	plexin B3 [Source:MGI Symbol;Acc:MGI:2154240]	140571	X	72800696	72816120	q	1
NM_019583.3	Il17rb	100.681	0.0499435	0.1278	0.390793	0.69595	0.857739	0.0666446	NM_019583	50905	interleukin 17 receptor B [Source:MGI Symbol;Acc:MGI:1355292]	50905	14	29718092	29730853	q	-1
NM_181547.3	Nostrin	146.465	-0.0541508	0.162403	-0.333435	0.738806	0.857785	0.0666214	NM_181547	329416	nitric oxide synthase trafficker [Source:MGI Symbol;Acc:MGI:3606242]	329416	2	68966144	69019674	q	1
NM_001113391.2	Cd247	45.7169	0.0736387	0.19001	0.387552	0.698347	0.859062	0.0659757	NM_001113391	12503	CD247 antigen [Source:MGI Symbol;Acc:MGI:88334]	12503	1	165616250	165704846	q	1
NM_133983.4	Cd276	270.446	-0.0415686	0.107728	-0.385867	0.699595	0.859062	0.0659757	NM_133983	102657	CD276 antigen [Source:MGI Symbol;Acc:MGI:2183926]	102657	9	58431581	58462720	q	-1
NM_008532.2	Epcam	21.2349	-0.0761875	0.231054	-0.32974	0.741597	0.859707	0.0656495	NM_008532	17075	epithelial cell adhesion molecule [Source:MGI Symbol;Acc:MGI:106653]	17075	17	87943407	87958557	q	1
NM_026887.2	Ap1s2	3236.24	0.0807609	0.214057	0.377287	0.70596	0.862157	0.0644135	NM_026887	108012	adaptor-related protein complex 1, sigma 2 subunit [Source:MGI Symbol;Acc:MGI:1889383]	108012	X	162692013	162716662	q	1
NM_001081412.2	Bcr	3560.59	0.0976734	0.265039	0.368525	0.712482	0.862157	0.0644135	NM_001081412	110279	BCR activator of RhoGEF and GTPase [Source:MGI Symbol;Acc:MGI:88141]	110279	10	74896424	75020753	q	1
NM_013463.2	Gla	383.574	0.048881	0.130791	0.373734	0.708602	0.862157	0.0644135	NM_013463	11605	galactosidase, alpha [Source:MGI Symbol;Acc:MGI:1347344]	11605	X	133488898	133501874	q	-1
NM_010390.3	H2-Q1	30.754	0.13175	0.348424	0.37813	0.705334	0.862157	0.0644135	NM_010390	15006	histocompatibility 2, Q region locus 1 [Source:MGI Symbol;Acc:MGI:95928]	15006	17	35539381	35544075	q	1
NM_008230.4	Hdc	24.565	-0.0808778	0.218963	-0.369368	0.711853	0.862157	0.0644135	NM_008230	15186	histidine decarboxylase [Source:MGI Symbol;Acc:MGI:96062]	15186	2	126435587	126461219	q	-1
NM_001135100.1	Il34	1739.29	0.0861193	0.233659	0.368568	0.712449	0.862157	0.0644135	NM_001135100	76527	interleukin 34 [Source:MGI Symbol;Acc:MGI:1923777]	76527	8	111468461	111532556	q	-1
NM_022417.3	Itm2c	10210.3	-0.0565637	0.152556	-0.370775	0.710805	0.862157	0.0644135	NM_022417	64294	integral membrane protein 2C [Source:MGI Symbol;Acc:MGI:1927594]	64294	1	85822002	85836396	q	1
NM_001162365.1	Ptk2b	6326.3	0.06488	0.176858	0.366848	0.713732	0.862157	0.0644135	NM_001162365	19229	PTK2 protein tyrosine kinase 2 beta [Source:MGI Symbol;Acc:MGI:104908]	19229	14	66390706	66518501	q	-1
NM_016928.2	Tlr5	23.1756	0.0842814	0.226693	0.371786	0.710052	0.862157	0.0644135	NM_016928	53791	toll-like receptor 5 [Source:MGI Symbol;Acc:MGI:1858171]	53791	1	182782353	182804010	q	1
NM_024264.3	Cyp27a1	308.089	-0.0634615	0.195299	-0.324945	0.745223	0.86259	0.0641956	NM_024264	104086	cytochrome P450, family 27, subfamily a, polypeptide 1 [Source:MGI Symbol;Acc:MGI:88594]	104086	1	74752733	74777051	q	1
NM_001122954.1	Pla2g5	57.8451	0.0533934	0.167506	0.318755	0.749912	0.866693	0.0621349	NM_001122954	18784	phospholipase A2, group V [Source:MGI Symbol;Acc:MGI:101899]	18784	4	138526555	138590793	q	-1
NM_029415.2	Slc10a6	23.938	0.0713477	0.226747	0.314657	0.753022	0.867854	0.0615532	NM_029415	75750	solute carrier family 10 (sodium/bile acid cotransporter family), member 6 [Source:MGI Symbol;Acc:MGI:1923000]	75750	5	103753577	103777269	q	-1
NM_009263.3	Spp1	2175.5	0.0950155	0.303661	0.3129	0.754357	0.867854	0.0615532	NM_009263	20750	secreted phosphoprotein 1 [Source:MGI Symbol;Acc:MGI:98389]	20750	5	104582984	104588916	q	1
NM_022724.4	Suv39h2	209.229	0.0319931	0.101958	0.313787	0.753683	0.867854	0.0615532	NM_022724	64707	suppressor of variegation 3-9 2 [Source:MGI Symbol;Acc:MGI:1890396]	64707	2	3456852	3476068	q	-1
NM_007610.1	Casp2	449.556	-0.0397445	0.129589	-0.306697	0.759074	0.868173	0.0613935	NM_007610	12366	caspase 2 [Source:MGI Symbol;Acc:MGI:97295]	12366	6	42241919	42259442	q	1
NM_008398.2	Itga7	255.406	0.0724789	0.237279	0.305459	0.760017	0.868173	0.0613935	NM_008398	16404	integrin alpha 7 [Source:MGI Symbol;Acc:MGI:102700]	16404	10	128769645	128794155	q	1
NM_008402.2	Itgav	1530.34	0.0369019	0.119837	0.307934	0.758133	0.868173	0.0613935	NM_008402	16410	integrin alpha V [Source:MGI Symbol;Acc:MGI:96608]	16410	2	83554741	83637260	q	1
NM_022029.2	Nrgn	6006.9	0.15842	0.519416	0.304997	0.760368	0.868173	0.0613935	NM_022029	64011	neurogranin [Source:MGI Symbol;Acc:MGI:1927184]	64011	9	37455788	37464200	q	-1
XM_011246258.1	C3	100.902	0.104711	0.293461	0.356813	0.721232	0.869644	0.0606584	XM_011246258	NA	NA	NA	NA	NA	NA	NA	NA
NM_177304.3	Enpp6	500.923	0.0543217	0.181152	0.299867	0.764278	0.870866	0.0600489	NM_177304	320981	ectonucleotide pyrophosphatase/phosphodiesterase 6 [Source:MGI Symbol;Acc:MGI:2445171]	320981	8	47439922	47549797	q	1
NM_001112698.1	Ngf	268.917	-0.13908	0.465327	-0.298886	0.765027	0.870866	0.0600489	NM_001112698	18049	nerve growth factor [Source:MGI Symbol;Acc:MGI:97321]	18049	3	102377235	102428329	q	1
NM_007940.3	Ephx2	631.153	0.0500488	0.143694	0.348301	0.727614	0.874184	0.0583973	NM_007940	13850	epoxide hydrolase 2, cytoplasmic [Source:MGI Symbol;Acc:MGI:99500]	13850	14	66321823	66361949	q	-1
NM_009422.2	Traf2	574.335	-0.0253655	0.0725605	-0.349577	0.726656	0.874184	0.0583973	NM_009422	22030	TNF receptor-associated factor 2 [Source:MGI Symbol;Acc:MGI:101835]	22030	2	25407994	25436952	q	-1
NM_007718.3	Ccr1l1	24.4945	0.0887271	0.259291	0.342191	0.732207	0.877763	0.0566228	NM_007718	12770	C-C motif chemokine receptor 1 like 1 [Source:MGI Symbol;Acc:MGI:104617]	12770	9	123777280	123778445	q	-1
NM_021896.4	Gucy1a1	3085.94	0.081767	0.239896	0.340844	0.733221	0.877763	0.0566228	NM_021896	60596	guanylate cyclase 1, soluble, alpha 1 [Source:MGI Symbol;Acc:MGI:1926562]	60596	3	81999734	82053096	q	-1
NM_008885.2	Pmp22	1568.18	-0.0419055	0.146033	-0.286959	0.774144	0.87992	0.0555567	NM_008885	18858	peripheral myelin protein 22 [Source:MGI Symbol;Acc:MGI:97631]	18858	11	63019808	63050373	q	1
NM_001003960.3	Dnmt3b	35.8441	-0.0579619	0.203244	-0.285183	0.775504	0.880144	0.0554461	NM_001003960	13436	DNA methyltransferase 3B [Source:MGI Symbol;Acc:MGI:1261819]	13436	2	153491370	153529650	q	1
NM_007976.2	F5	28.3734	0.0811346	0.242354	0.334778	0.737793	0.881656	0.054701	NM_007976	14067	coagulation factor V [Source:MGI Symbol;Acc:MGI:88382]	14067	1	163979407	164047846	q	1
NM_028019.4	Rnf135	175.819	0.0397706	0.120065	0.331243	0.740461	0.882964	0.0540572	NM_028019	71956	ring finger protein 135 [Source:MGI Symbol;Acc:MGI:1919206]	71956	11	80074677	80090583	q	1
XM_006532802.2	Tcf7	263.521	0.0744355	0.225681	0.329827	0.741531	0.882964	0.0540572	XM_006532802	NA	NA	NA	NA	NA	NA	NA	NA
NM_001253715.1	Msra	1564.57	-0.0316184	0.0976906	-0.323659	0.746196	0.886938	0.0521068	NM_001253715	110265	methionine sulfoxide reductase A [Source:MGI Symbol;Acc:MGI:106916]	110265	14	64360074	64693352	q	-1
NM_007523.2	Bak1	501.14	-0.0213715	0.0799601	-0.267277	0.789256	0.893074	0.0491124	NM_007523	12018	BCL2-antagonist/killer 1 [Source:MGI Symbol;Acc:MGI:1097161]	12018	17	27238784	27247983	q	-1
NM_009910.2	Cxcr3	21.9735	0.0731439	0.233595	0.313123	0.754187	0.893538	0.0488869	NM_009910	12766	C-X-C motif chemokine receptor 3 [Source:MGI Symbol;Acc:MGI:1277207]	12766	X	100775141	100777875	q	-1
NM_023913.2	Ern1	264.073	-0.0294712	0.094214	-0.312811	0.754424	0.893538	0.0488869	NM_023913	78943	endoplasmic reticulum to nucleus signalling 1 [Source:MGI Symbol;Acc:MGI:1930134]	78943	11	106285476	106378678	q	-1
NM_016849.4	Irf3	510.345	0.0200492	0.0648812	0.309014	0.757311	0.893868	0.0487268	NM_016849	54131	interferon regulatory factor 3 [Source:MGI Symbol;Acc:MGI:1859179]	54131	7	44647072	44652272	q	1
NM_019482.2	Panx1	497.403	-0.0703743	0.227804	-0.308925	0.757379	0.893868	0.0487268	NM_019482	55991	pannexin 1 [Source:MGI Symbol;Acc:MGI:1860055]	55991	9	14913424	14956774	q	-1
NM_007725.2	Cnn2	213.604	0.0386392	0.154598	0.249934	0.802638	0.90551	0.0431069	NM_007725	12798	calponin 2 [Source:MGI Symbol;Acc:MGI:105093]	12798	10	79824418	79831896	q	1
NM_177781.4	Trpa1	20.9775	-0.0571431	0.238524	-0.23957	0.810664	0.913203	0.0394327	NM_177781	277328	transient receptor potential cation channel, subfamily A, member 1 [Source:MGI Symbol;Acc:MGI:3522699]	277328	1	14942872	14989086	q	-1
NM_007525.3	Bard1	85.2581	0.0365409	0.156	0.234237	0.814801	0.913404	0.0393369	NM_007525	12021	BRCA1 associated RING domain 1 [Source:MGI Symbol;Acc:MGI:1328361]	12021	1	71066657	71142305	q	-1
NM_010773.2	Mbd2	4730.19	-0.0238714	0.101093	-0.236134	0.813329	0.913404	0.0393369	NM_010773	17191	methyl-CpG binding domain protein 2 [Source:MGI Symbol;Acc:MGI:1333813]	17191	18	70701260	70759202	q	1
NM_138952.3	Ripk2	235.792	-0.027201	0.0962224	-0.282689	0.777415	0.915896	0.0381537	NM_138952	192656	receptor (TNFRSF)-interacting serine-threonine kinase 2 [Source:MGI Symbol;Acc:MGI:1891456]	192656	4	16122733	16163647	q	-1
NM_007431.3	Alpl	103.126	-0.0325177	0.119123	-0.272977	0.784871	0.922526	0.0350215	NM_007431	11647	alkaline phosphatase, liver/bone/kidney [Source:MGI Symbol;Acc:MGI:87983]	11647	4	137469044	137523695	q	-1
NM_007721.4	Ccr10	22.0552	-0.0613176	0.228649	-0.268173	0.788566	0.922526	0.0350215	NM_007721	12777	C-C motif chemokine receptor 10 [Source:MGI Symbol;Acc:MGI:1096320]	12777	11	101063823	101066269	q	-1
NM_007644.3	Scarb2	2226.35	-0.018875	0.0700292	-0.269531	0.787521	0.922526	0.0350215	NM_007644	12492	scavenger receptor class B, member 2 [Source:MGI Symbol;Acc:MGI:1196458]	12492	5	92589173	92654692	q	-1
NM_019883.3	Uba52	38168.5	-0.0210755	0.077706	-0.271221	0.786221	0.922526	0.0350215	NM_019883	22186	ubiquitin A-52 residue ribosomal protein fusion product 1 [Source:MGI Symbol;Acc:MGI:98887]	22186	8	70960913	70963451	q	-1
NM_008816.2	Pecam1	758.63	-0.0303468	0.113971	-0.266269	0.790032	0.922625	0.0349747	NM_008816	18613	platelet/endothelial cell adhesion molecule 1 [Source:MGI Symbol;Acc:MGI:97537]	18613	11	106545043	106641454	q	-1
NM_019566.3	Rhog	1597.64	-0.0421976	0.159553	-0.264473	0.791415	0.922627	0.0349738	NM_019566	56212	ras homolog family member G [Source:MGI Symbol;Acc:MGI:1928370]	56212	7	101888330	101905261	q	-1
NM_009876.3	Cdkn1c	128.372	-0.0259575	0.118548	-0.218962	0.82668	0.923004	0.0347964	NM_009876	12577	cyclin dependent kinase inhibitor 1C [Source:MGI Symbol;Acc:MGI:104564]	12577	7	143012076	143014787	q	-1
NM_019827.3	Gsk3b	6195.14	-0.0238844	0.0912407	-0.261773	0.793496	0.923442	0.0345906	NM_019827	56637	glycogen synthase kinase 3 beta [Source:MGI Symbol;Acc:MGI:1861437]	56637	16	37909363	38066446	q	1
NM_015775.2	Tmprss2	21.0651	-0.0595423	0.229168	-0.259819	0.795003	0.923587	0.0345224	NM_015775	50528	transmembrane protease, serine 2 [Source:MGI Symbol;Acc:MGI:1354381]	50528	16	97365882	97412395	q	-1
NM_144907.1	Sesn2	194.788	0.0291145	0.136605	0.213128	0.831227	0.925351	0.0336934	NM_144907	230784	sestrin 2 [Source:MGI Symbol;Acc:MGI:2651874]	230784	4	132219343	132237812	q	-1
NM_010684.2	Lamp1	5117.32	-0.0217291	0.0856692	-0.25364	0.799774	0.925908	0.0334322	NM_010684	16783	lysosomal-associated membrane protein 1 [Source:MGI Symbol;Acc:MGI:96745]	16783	8	13209161	13225338	q	1
NM_001205312.1	Tyk2	175.974	0.0308249	0.121276	0.254171	0.799363	0.925908	0.0334322	NM_001205312	54721	tyrosine kinase 2 [Source:MGI Symbol;Acc:MGI:1929470]	54721	9	21015364	21042539	q	-1
NM_007763.3	Crip1	735.34	-0.0272057	0.134898	-0.201676	0.84017	0.926225	0.0332836	NM_007763	12925	cysteine-rich protein 1 [Source:MGI Symbol;Acc:MGI:88501]	12925	12	113109936	113117499	q	1
NM_010957.4	Ogg1	176.887	0.0223911	0.113071	0.198027	0.843024	0.926225	0.0332836	NM_010957	18294	8-oxoguanine DNA-glycosylase 1 [Source:MGI Symbol;Acc:MGI:1097693]	18294	6	113303933	113312029	q	1
NM_011158.3	Prkar2b	3349	-0.0524965	0.253666	-0.206951	0.836048	0.926225	0.0332836	NM_011158	19088	protein kinase, cAMP dependent regulatory, type II beta [Source:MGI Symbol;Acc:MGI:97760]	19088	12	32008475	32111295	q	-1
NM_009221.2	Snca	1846.73	0.062227	0.296008	0.21022	0.833496	0.926225	0.0332836	NM_009221	20617	synuclein, alpha [Source:MGI Symbol;Acc:MGI:1277151]	20617	6	60708559	60806839	q	-1
NM_011587.2	Tie1	361.055	-0.0265177	0.126949	-0.208885	0.834538	0.926225	0.0332836	NM_011587	21846	tyrosine kinase with immunoglobulin-like and EGF-like domains 1 [Source:MGI Symbol;Acc:MGI:99906]	21846	4	118328388	118347258	q	-1
NM_026433.2	Tmem100	508.559	0.020649	0.104107	0.198345	0.842775	0.926225	0.0332836	NM_026433	67888	transmembrane protein 100 [Source:MGI Symbol;Acc:MGI:1915138]	67888	11	89921174	89927334	q	1
NM_176979.5	Topbp1	377.507	-0.0153016	0.074699	-0.204843	0.837695	0.926225	0.0332836	NM_176979	235559	topoisomerase (DNA) II binding protein 1 [Source:MGI Symbol;Acc:MGI:1920018]	235559	9	103182414	103227627	q	1
NM_001169153.1	Cd300lf	22.6556	0.043042	0.231563	0.185876	0.852542	0.926305	0.033246	NM_001169153	246746	CD300 molecule like family member F [Source:MGI Symbol;Acc:MGI:2442359]	246746	11	115007040	115024818	q	-1
NM_011809.2	Ets2	1647.63	-0.0420003	0.216831	-0.1937	0.846411	0.926305	0.033246	NM_011809	23872	E26 avian leukemia oncogene 2, 3' domain [Source:MGI Symbol;Acc:MGI:95456]	23872	16	95502942	95522095	q	1
NM_010228.3	Flt1	706.883	0.0178711	0.0956465	0.186846	0.851782	0.926305	0.033246	NM_010228	14254	FMS-like tyrosine kinase 1 [Source:MGI Symbol;Acc:MGI:95558]	14254	5	147498414	147662821	q	-1
NM_001162884.1	Igsf10	84.5171	-0.0500076	0.261709	-0.191081	0.848462	0.926305	0.033246	NM_001162884	242050	immunoglobulin superfamily, member 10 [Source:MGI Symbol;Acc:MGI:1923481]	242050	3	59224156	59251815	q	-1
NM_001164056.1	Pld1	314.868	-0.0247223	0.134715	-0.183516	0.854393	0.926305	0.033246	NM_001164056	18805	phospholipase D1 [Source:MGI Symbol;Acc:MGI:109585]	18805	3	27992844	28187511	q	1
NM_026162.5	Plxdc2	2762.59	0.0199991	0.106994	0.186918	0.851725	0.926305	0.033246	NM_026162	67448	plexin domain containing 2 [Source:MGI Symbol;Acc:MGI:1914698]	67448	2	16361115	16760650	q	1
NM_018877.2	Setdb1	412.905	-0.0205163	0.107035	-0.191678	0.847994	0.926305	0.033246	NM_018877	84505	SET domain, bifurcated 1 [Source:MGI Symbol;Acc:MGI:1934229]	84505	3	95230836	95264513	q	-1
NM_019741.3	Slc2a5	236.314	-0.0208258	0.114224	-0.182323	0.855329	0.926305	0.033246	NM_019741	56485	solute carrier family 2 (facilitated glucose transporter), member 5 [Source:MGI Symbol;Acc:MGI:1928369]	56485	4	150203740	150228626	q	1
NM_018784.2	St3gal6	399.227	0.0183237	0.10044	0.182435	0.855242	0.926305	0.033246	NM_018784	54613	ST3 beta-galactoside alpha-2,3-sialyltransferase 6 [Source:MGI Symbol;Acc:MGI:1888707]	54613	16	58288488	58344606	q	-1
NM_008764.3	Tnfrsf11b	52.9519	0.0315503	0.173051	0.182318	0.855333	0.926305	0.033246	NM_008764	18383	tumor necrosis factor receptor superfamily, member 11b (osteoprotegerin) [Source:MGI Symbol;Acc:MGI:109587]	18383	15	54114015	54141880	q	-1
NM_013863.4	Bag3	228.281	-0.0275269	0.154106	-0.178623	0.858234	0.926795	0.0330164	NM_013863	29810	BCL2-associated athanogene 3 [Source:MGI Symbol;Acc:MGI:1352493]	29810	7	128125340	128148705	q	1
NM_010721.2	Lmnb1	343.698	0.0275385	0.153765	0.179095	0.857863	0.926795	0.0330164	NM_010721	16906	lamin B1 [Source:MGI Symbol;Acc:MGI:96795]	16906	18	56840885	56886496	q	1
NM_010392.2	H2-Q2	30.6031	0.0642781	0.259558	0.247644	0.80441	0.927858	0.0325183	NM_010392	15013	histocompatibility 2, Q region locus 2 [Source:MGI Symbol;Acc:MGI:95931]	15013	17	35561218	35565738	q	1
NM_001034029.2	Il17re	24.0049	-0.0543532	0.220882	-0.246073	0.805626	0.927858	0.0325183	NM_001034029	57890	interleukin 17 receptor E [Source:MGI Symbol;Acc:MGI:1889371]	57890	6	113435445	113447719	q	1
NM_021396.2	Pdcd1lg2	21.846	0.0570938	0.231865	0.246238	0.805498	0.927858	0.0325183	NM_021396	58205	programmed cell death 1 ligand 2 [Source:MGI Symbol;Acc:MGI:1930125]	58205	19	29388319	29448561	q	1
NM_007635.4	Ccng2	1144.74	0.0269119	0.153234	0.175626	0.860588	0.928012	0.0324462	NM_007635	12452	cyclin G2 [Source:MGI Symbol;Acc:MGI:1095734]	12452	5	93415116	93424090	q	1
NM_001122733.1	Kit	388.857	0.0471453	0.277693	0.169775	0.865187	0.929176	0.0319022	NM_001122733	16590	KIT proto-oncogene receptor tyrosine kinase [Source:MGI Symbol;Acc:MGI:96677]	16590	5	75735576	75817382	q	1
NM_010735.2	Lta	26.5617	-0.0381371	0.224612	-0.169791	0.865175	0.929176	0.0319022	NM_010735	16992	lymphotoxin A [Source:MGI Symbol;Acc:MGI:104797]	16992	17	35422141	35424327	q	-1
NM_008871.2	Serpine1	45.3996	0.037919	0.223619	0.16957	0.865348	0.929176	0.0319022	NM_008871	18787	serine (or cysteine) peptidase inhibitor, clade E, member 1 [Source:MGI Symbol;Acc:MGI:97608]	18787	5	137090358	137101122	q	-1
NM_010699.2	Ldha	5140.5	-0.0285151	0.169767	-0.167966	0.86661	0.929212	0.031885	NM_010699	16828	lactate dehydrogenase A [Source:MGI Symbol;Acc:MGI:96759]	16828	7	46490899	46505051	q	1
NM_027808.1	Alpk1	213.778	0.038119	0.157688	0.241737	0.808984	0.930123	0.0314597	NM_027808	71481	alpha-kinase 1 [Source:MGI Symbol;Acc:MGI:1918731]	71481	3	127463959	127574176	q	-1
NM_009913.6	Ccr9	27.7501	-0.0598187	0.261542	-0.228715	0.81909	0.93382	0.0297367	NM_009913	12769	C-C motif chemokine receptor 9 [Source:MGI Symbol;Acc:MGI:1341902]	12769	9	123507504	123613395	q	1
NM_018729.2	Cd244a	20.7049	-0.0511031	0.227133	-0.224992	0.821986	0.93382	0.0297367	NM_018729	18106	CD244 molecule A [Source:MGI Symbol;Acc:MGI:109294]	18106	1	171386761	171437314	q	1
NM_019980.2	Litaf	980.608	-0.034716	0.153287	-0.226477	0.82083	0.93382	0.0297367	NM_019980	56722	LPS-induced TN factor [Source:MGI Symbol;Acc:MGI:1929512]	56722	16	10777139	10884021	q	-1
NM_133942.2	Plekha1	3859.09	-0.0198725	0.0859564	-0.231192	0.817165	0.93382	0.0297367	NM_133942	101476	pleckstrin homology domain containing, family A (phosphoinositide binding specific) member 1 [Source:MGI Symbol;Acc:MGI:2442213]	101476	7	130467486	130515042	q	1
NM_024456.5	Rab5c	1784.12	-0.0189307	0.081676	-0.231778	0.816711	0.93382	0.0297367	NM_024456	19345	RAB5C, member RAS oncogene family [Source:MGI Symbol;Acc:MGI:105306]	19345	11	100605835	100629041	q	-1
NM_019955.1	Ripk3	20.7076	-0.0509994	0.224513	-0.227155	0.820303	0.93382	0.0297367	NM_019955	56532	receptor-interacting serine-threonine kinase 3 [Source:MGI Symbol;Acc:MGI:2154952]	56532	14	56022452	56026322	q	-1
NM_001013616.2	Trim6	22.6644	0.0544247	0.239741	0.227014	0.820413	0.93382	0.0297367	NM_001013616	94088	tripartite motif-containing 6 [Source:MGI Symbol;Acc:MGI:2137352]	94088	7	103868000	103884359	q	1
NM_001162410.1	Chuk	1458.71	-0.0185581	0.0839179	-0.221145	0.824979	0.93563	0.0288959	NM_001162410	12675	conserved helix-loop-helix ubiquitous kinase [Source:MGI Symbol;Acc:MGI:99484]	12675	19	44061774	44095919	q	-1
NM_007872.4	Dnmt3a	847.417	-0.0227997	0.149945	-0.152054	0.879144	0.937341	0.0281023	NM_007872	13435	DNA methyltransferase 3A [Source:MGI Symbol;Acc:MGI:1261827]	13435	12	3856007	3964443	q	1
NM_027817.3	Grap	219.877	-0.0175362	0.11519	-0.152237	0.879	0.937341	0.0281023	NM_027817	71520	GRB2-related adaptor protein [Source:MGI Symbol;Acc:MGI:1918770]	71520	11	61544091	61563610	q	1
NM_007722.3	Ackr3	103.815	-0.0263185	0.121789	-0.2161	0.82891	0.937774	0.0279018	NM_007722	12778	atypical chemokine receptor 3 [Source:MGI Symbol;Acc:MGI:109562]	12778	1	90131702	90144473	q	1
NM_001009935.2	Txnip	1610.94	0.0344017	0.159922	0.215116	0.829677	0.937774	0.0279018	NM_001009935	56338	thioredoxin interacting protein [Source:MGI Symbol;Acc:MGI:1889549]	56338	3	96465273	96469199	q	1
NM_007440.4	Alox12	32.1739	0.0564485	0.266803	0.211574	0.83244	0.939307	0.0271925	NM_007440	11684	arachidonate 12-lipoxygenase [Source:MGI Symbol;Acc:MGI:87998]	11684	11	70132283	70146179	q	-1
NM_001039484.1	Kcnj10	6655.66	0.0259409	0.183693	0.141219	0.887697	0.941158	0.0263376	NM_001039484	16513	potassium inwardly-rectifying channel, subfamily J, member 10 [Source:MGI Symbol;Acc:MGI:1194504]	16513	1	172168777	172201652	q	1
NM_001164184.1	Lsr	413.501	-0.0234933	0.165625	-0.141847	0.887201	0.941158	0.0263376	NM_001164184	54135	lipolysis stimulated lipoprotein receptor [Source:MGI Symbol;Acc:MGI:1927471]	54135	7	30657195	30672889	q	-1
NM_011132.2	Pole	65.7171	-0.0256814	0.179456	-0.143106	0.886206	0.941158	0.0263376	NM_011132	18973	polymerase (DNA directed), epsilon [Source:MGI Symbol;Acc:MGI:1196391]	18973	5	110434172	110485340	q	1
NM_026988.2	Ptms	18126.3	0.014766	0.102077	0.144655	0.884983	0.941158	0.0263376	NM_026988	69202	parathymosin [Source:MGI Symbol;Acc:MGI:1916452]	69202	6	124890644	124897066	q	-1
NM_010374.3	Gzmf	21.5575	-0.0481815	0.234746	-0.205249	0.837377	0.941697	0.0260887	NM_010374	14943	granzyme F [Source:MGI Symbol;Acc:MGI:109254]	14943	14	56442720	56448874	q	-1
NM_010736.4	Ltbr	46.5543	0.0352448	0.17071	0.20646	0.836431	0.941697	0.0260887	NM_010736	17000	lymphotoxin B receptor [Source:MGI Symbol;Acc:MGI:104875]	17000	6	125283534	125290848	q	-1
NM_011237.2	Rad9a	289.82	0.0201287	0.146304	0.137582	0.890571	0.942884	0.0255417	NM_011237	19367	RAD9 checkpoint clamp component A [Source:MGI Symbol;Acc:MGI:1328356]	19367	19	4245195	4251661	q	-1
NM_001164724.1	Il33	3116.51	-0.0274208	0.136144	-0.20141	0.840378	0.943484	0.0252657	NM_001164724	77125	interleukin 33 [Source:MGI Symbol;Acc:MGI:1924375]	77125	19	29902514	29938118	q	1
NM_008363.2	Irak1	1374.26	-0.0227061	0.115456	-0.196664	0.84409	0.945698	0.0242476	NM_008363	16179	interleukin-1 receptor-associated kinase 1 [Source:MGI Symbol;Acc:MGI:107420]	16179	X	73057520	73067524	q	-1
NM_013566.2	Itgb7	21.5355	0.0447258	0.229833	0.194602	0.845705	0.945698	0.0242476	NM_013566	16421	integrin beta 7 [Source:MGI Symbol;Acc:MGI:96616]	16421	15	102124430	102140379	q	-1
NM_011947.3	Map3k3	689.074	-0.0183846	0.0977691	-0.188041	0.850845	0.945698	0.0242476	NM_011947	26406	mitogen-activated protein kinase kinase kinase 3 [Source:MGI Symbol;Acc:MGI:1346874]	26406	11	105975439	106046272	q	1
NM_144888.2	Mavs	358.942	0.0188362	0.0974192	0.193352	0.846683	0.945698	0.0242476	NM_144888	228607	mitochondrial antiviral signaling protein [Source:MGI Symbol;Acc:MGI:2444773]	228607	2	131075983	131089945	q	1
NM_008714.2	Notch1	870.519	0.0222316	0.117756	0.188793	0.850255	0.945698	0.0242476	NM_008714	18128	notch 1 [Source:MGI Symbol;Acc:MGI:97363]	18128	2	26347915	26406675	q	-1
NM_009045.4	Rela	355.953	-0.0203986	0.107241	-0.190212	0.849143	0.945698	0.0242476	NM_009045	19697	v-rel reticuloendotheliosis viral oncogene homolog A (avian) [Source:MGI Symbol;Acc:MGI:103290]	19697	19	5687511	5698158	q	1
NM_010054.2	Dlx2	118.527	-0.0508456	0.38369	-0.132517	0.894575	0.945801	0.0242003	NM_010054	13392	distal-less homeobox 2 [Source:MGI Symbol;Acc:MGI:94902]	13392	2	71373752	71377098	q	-1
NM_010693.2	Lck	66.9342	0.0480385	0.259185	0.185344	0.852959	0.946473	0.023892	NM_010693	16818	lymphocyte protein tyrosine kinase [Source:MGI Symbol;Acc:MGI:96756]	16818	4	129442137	129467434	q	-1
NM_001163621.1	Apol6	21.6205	-0.0408072	0.222634	-0.183293	0.854568	0.946686	0.0237942	NM_001163621	71939	apolipoprotein L 6 [Source:MGI Symbol;Acc:MGI:1919189]	71939	15	76928929	76941306	q	1
XM_909927.2	Ly6g	22.7558	0.0292021	0.226935	0.12868	0.897611	0.947687	0.0233352	XM_909927	NA	NA	NA	NA	NA	NA	NA	NA
NM_008351.1	Il12a	23.4144	0.0410884	0.227893	0.180297	0.856919	0.947719	0.0233205	NM_008351	16159	interleukin 12a [Source:MGI Symbol;Acc:MGI:96539]	16159	3	68597977	68605880	q	1
NM_013487.3	Cd3d	22.8477	-0.0395485	0.222147	-0.178028	0.858701	0.948119	0.0231371	NM_013487	12500	CD3 antigen, delta polypeptide [Source:MGI Symbol;Acc:MGI:88331]	12500	9	44893084	44898637	q	1
NM_013560.2	Hspb1	508.091	-0.0340581	0.195821	-0.173925	0.861925	0.948543	0.022943	NM_013560	15507	heat shock protein 1 [Source:MGI Symbol;Acc:MGI:96240]	15507	5	135916773	135918417	q	1
NM_001033367.3	Nlrc4	25.102	-0.0440425	0.251945	-0.17481	0.861229	0.948543	0.022943	NM_001033367	268973	NLR family, CARD domain containing 4 [Source:MGI Symbol;Acc:MGI:3036243]	268973	17	74732433	74766137	q	-1
NM_008564.2	Mcm2	115.534	-0.0146724	0.11657	-0.125867	0.899837	0.948714	0.0228648	NM_008564	17216	minichromosome maintenance complex component 2 [Source:MGI Symbol;Acc:MGI:105380]	17216	6	88860456	88875762	q	-1
NM_134122.2	Nrm	130.15	-0.0161914	0.130802	-0.123786	0.901485	0.949129	0.0226745	NM_134122	106582	nurim (nuclear envelope membrane protein) [Source:MGI Symbol;Acc:MGI:2146855]	106582	17	36172210	36176294	q	1
NM_148938.3	Slc1a3	12474.8	-0.0224225	0.185769	-0.120701	0.903928	0.95038	0.0221028	NM_148938	20512	solute carrier family 1 (glial high affinity glutamate transporter), member 3 [Source:MGI Symbol;Acc:MGI:99917]	20512	15	8663608	8740248	q	-1
NM_011101.3	Prkca	1347.7	-0.0428106	0.25271	-0.169406	0.865477	0.950886	0.0218714	NM_011101	18750	protein kinase C, alpha [Source:MGI Symbol;Acc:MGI:97595]	18750	11	107824213	108234754	q	-1
NM_174875.3	Atg4a	587.726	-0.0133234	0.0863374	-0.154317	0.877359	0.953061	0.0208794	NM_174875	666468	autophagy related 4A, cysteine peptidase [Source:MGI Symbol;Acc:MGI:2147903]	666468	X	139857656	139947266	q	1
NM_008370.2	Il5ra	21.4438	0.0350419	0.229932	0.152401	0.87887	0.953061	0.0208794	NM_008370	16192	interleukin 5 receptor, alpha [Source:MGI Symbol;Acc:MGI:96558]	16192	6	106687318	106725998	q	-1
NM_008521.1	Ltc4s	61.6728	0.0232126	0.150855	0.153873	0.87771	0.953061	0.0208794	NM_008521	17001	leukotriene C4 synthase [Source:MGI Symbol;Acc:MGI:107498]	17001	11	50127288	50129443	q	-1
NM_175088.5	Mdfic	66.2435	0.0242919	0.15599	0.155727	0.876248	0.953061	0.0208794	NM_175088	16543	MyoD family inhibitor domain containing [Source:MGI Symbol;Acc:MGI:104611]	16543	6	15720660	15802168	q	1
NM_008877.3	Plg	21.861	-0.0354328	0.222838	-0.159007	0.873663	0.953061	0.0208794	NM_008877	18815	plasminogen [Source:MGI Symbol;Acc:MGI:97620]	18815	17	12597495	12638272	q	1
NM_011193.2	Pstpip1	46.0539	0.0605373	0.380836	0.158959	0.873701	0.953061	0.0208794	NM_011193	19200	proline-serine-threonine phosphatase-interacting protein 1 [Source:MGI Symbol;Acc:MGI:1321396]	19200	9	55997246	56036172	q	1
NR_045676.1	Rasgrp4	34.1781	-0.0323715	0.206186	-0.157001	0.875244	0.953061	0.0208794	NR_045676	NA	NA	NA	NA	NA	NA	NA	NA
NM_148945.1	Rps6ka3	2047.41	0.0230133	0.147022	0.15653	0.875615	0.953061	0.0208794	NM_148945	110651	ribosomal protein S6 kinase polypeptide 3 [Source:MGI Symbol;Acc:MGI:104557]	110651	X	157993303	158151240	q	1
NM_177320.2	Pik3r5	27.4803	-0.0284507	0.251452	-0.113146	0.909915	0.954024	0.0204405	NM_177320	320207	phosphoinositide-3-kinase regulatory subunit 5 [Source:MGI Symbol;Acc:MGI:2443588]	320207	11	68322947	68388675	q	1
NM_001111274.1	Igf1	51.89	-0.0327549	0.294198	-0.111336	0.91135	0.954207	0.0203574	NM_001111274	16000	insulin-like growth factor 1 [Source:MGI Symbol;Acc:MGI:96432]	16000	10	87694127	87772904	q	1
NM_145940.2	Wipi1	1329.15	0.0157487	0.106015	0.148552	0.881907	0.954804	0.0200857	NM_145940	52639	WD repeat domain, phosphoinositide interacting 1 [Source:MGI Symbol;Acc:MGI:1261864]	52639	11	109464157	109502793	q	-1
NM_017469.4	Gucy1b1	4460.21	0.0275223	0.189965	0.144881	0.884805	0.954846	0.0200666	NM_017469	54195	guanylate cyclase 1, soluble, beta 1 [Source:MGI Symbol;Acc:MGI:1860604]	54195	3	81939313	81981996	q	-1
NM_001033543.3	Il20rb	38.057	-0.032249	0.221925	-0.145314	0.884463	0.954846	0.0200666	NM_001033543	213208	interleukin 20 receptor beta [Source:MGI Symbol;Acc:MGI:2143266]	213208	9	100339772	100368841	q	-1
NM_007646.5	Cd38	664.444	-0.0166499	0.117943	-0.14117	0.887736	0.954924	0.0200313	NM_007646	12494	CD38 antigen [Source:MGI Symbol;Acc:MGI:107474]	12494	5	44025895	44069717	q	1
NM_017480.1	Icos	20.8448	-0.0325232	0.227737	-0.14281	0.88644	0.954924	0.0200313	NM_017480	54167	inducible T cell co-stimulator [Source:MGI Symbol;Acc:MGI:1858745]	54167	1	61017086	61039479	q	1
NM_010555.4	Il1r2	25.4287	0.0305921	0.221868	0.137884	0.890332	0.956177	0.0194619	NM_010555	16178	interleukin 1 receptor, type II [Source:MGI Symbol;Acc:MGI:96546]	16178	1	40113239	40164391	q	1
NM_001252403.1	Gria1	5227.21	-0.0264288	0.255403	-0.103479	0.917583	0.957583	0.0188236	NM_001252403	14799	glutamate receptor, ionotropic, AMPA1 (alpha 1) [Source:MGI Symbol;Acc:MGI:95808]	14799	11	56902213	57221070	q	1
NM_010755.3	Maff	31.2313	-0.0272769	0.266431	-0.102379	0.918456	0.957583	0.0188236	NM_010755	17133	v-maf musculoaponeurotic fibrosarcoma oncogene family, protein F (avian) [Source:MGI Symbol;Acc:MGI:96910]	17133	15	79230821	79243276	q	1
NM_001044371.1	Rad17	373.644	0.00859139	0.0851519	0.100895	0.919634	0.957583	0.0188236	NM_001044371	19356	RAD17 checkpoint clamp loader component [Source:MGI Symbol;Acc:MGI:1333807]	19356	13	100753672	100787559	q	-1
NM_001081365.1	Cystm1	1836.61	-0.0177472	0.134481	-0.131969	0.895009	0.959657	0.0178842	NM_001081365	66060	cysteine-rich transmembrane module containing 1 [Source:MGI Symbol;Acc:MGI:1913310]	66060	18	36475573	36536150	q	1
NM_145429.4	Arrb2	1297.1	-0.0082239	0.073799	-0.111436	0.91127	0.964181	0.0158416	NM_145429	216869	arrestin, beta 2 [Source:MGI Symbol;Acc:MGI:99474]	216869	11	70323461	70331654	q	1
NM_009914.4	Ccr3	21.7827	0.0254516	0.230874	0.11024	0.912219	0.964181	0.0158416	NM_009914	12771	C-C motif chemokine receptor 3 [Source:MGI Symbol;Acc:MGI:104616]	12771	9	123822009	123831726	q	1
NM_009870.3	Cdk4	1399.08	-0.0114704	0.0991593	-0.115677	0.907909	0.964181	0.0158416	NM_009870	12567	cyclin dependent kinase 4 [Source:MGI Symbol;Acc:MGI:88357]	12567	10	126899403	126903789	q	1
NM_007551.3	Cxcr5	21.5429	-0.0255598	0.228312	-0.111951	0.910862	0.964181	0.0158416	NM_007551	12145	C-X-C motif chemokine receptor 5 [Source:MGI Symbol;Acc:MGI:103567]	12145	9	44423084	44473174	q	-1
NM_010552.3	Il17a	21.3733	0.0262076	0.229099	0.114394	0.908925	0.964181	0.0158416	NM_010552	16171	interleukin 17A [Source:MGI Symbol;Acc:MGI:107364]	16171	1	20801129	20804720	q	1
NM_011095.2	Pirb	21.3446	0.0250431	0.224802	0.111401	0.911299	0.964181	0.0158416	NM_011095	18733	paired Ig-like receptor B [Source:MGI Symbol;Acc:MGI:894311]	18733	7	3714408	3723390	q	-1
NM_008965.1	Ptger4	23.6612	0.0265028	0.237773	0.111462	0.91125	0.964181	0.0158416	NM_008965	19219	prostaglandin E receptor 4 (subtype EP4) [Source:MGI Symbol;Acc:MGI:104311]	19219	15	5236142	5273668	q	-1
NM_001083921.1	Rbck1	1110.38	0.0186396	0.159049	0.117194	0.906706	0.964181	0.0158416	NM_001083921	24105	RanBP-type and C3HC4-type zinc finger containing 1 [Source:MGI Symbol;Acc:MGI:1344372]	24105	2	152158254	152174573	q	-1
NM_009906.5	Tpp1	641.228	-0.00837602	0.0696661	-0.120231	0.9043	0.964181	0.0158416	NM_009906	12751	tripeptidyl peptidase I [Source:MGI Symbol;Acc:MGI:1336194]	12751	7	105394018	105401442	q	-1
NM_008091.3	Gata3	26.0217	0.0261272	0.248475	0.10515	0.916257	0.965149	0.0154055	NM_008091	14462	GATA binding protein 3 [Source:MGI Symbol;Acc:MGI:95663]	14462	2	9861889	9894845	q	-1
NM_134159.2	Il17rc	39.61	-0.0190095	0.181799	-0.104564	0.916722	0.965149	0.0154055	NM_134159	171095	interleukin 17 receptor C [Source:MGI Symbol;Acc:MGI:2159336]	171095	6	113448388	113460101	q	1
NM_023324.2	Peli1	2072.95	-0.013266	0.130313	-0.101801	0.918915	0.965149	0.0154055	NM_023324	67245	pellino 1 [Source:MGI Symbol;Acc:MGI:1914495]	67245	11	21041291	21100323	q	1
NM_008540.2	Smad4	2546.73	0.0154913	0.150974	0.10261	0.918273	0.965149	0.0154055	NM_008540	17128	SMAD family member 4 [Source:MGI Symbol;Acc:MGI:894293]	17128	18	73772080	73836851	q	-1
NM_007908.3	Eef2k	620.633	-0.0126828	0.14486	-0.0875517	0.930233	0.967289	0.0144437	NM_007908	13631	eukaryotic elongation factor-2 kinase [Source:MGI Symbol;Acc:MGI:1195261]	13631	7	120442054	120506673	q	1
NM_054059.1	Ceacam3	28.1176	0.0218534	0.232723	0.0939028	0.925186	0.967654	0.0142798	NM_054059	384557	CEA cell adhesion molecule 3 [Source:MGI Symbol;Acc:MGI:3646296]	384557	7	16884207	16898178	q	1
NM_177348.2	Ifne	20.9581	-0.0215308	0.228891	-0.0940656	0.925057	0.967654	0.0142798	NM_177348	230405	interferon epsilon [Source:MGI Symbol;Acc:MGI:2667156]	230405	4	88797775	88798438	q	-1
NM_001081239.2	Lilra5	23.0189	0.0209302	0.224272	0.0933251	0.925645	0.967654	0.0142798	NM_001081239	232801	leukocyte immunoglobulin-like receptor, subfamily A (with TM domain), member 5 [Source:MGI Symbol;Acc:MGI:3647196]	232801	7	4240753	4246462	q	1
NM_016846.3	Rgl1	795.253	-0.0164311	0.196302	-0.0837033	0.933292	0.967811	0.0142093	NM_016846	19731	ral guanine nucleotide dissociation stimulator,-like 1 [Source:MGI Symbol;Acc:MGI:107484]	19731	1	152392511	152642102	q	-1
NM_153177.3	Ago4	117.188	-0.0169992	0.211426	-0.0804029	0.935917	0.967881	0.0141779	NM_153177	76850	argonaute RISC catalytic subunit 4 [Source:MGI Symbol;Acc:MGI:1924100]	76850	4	126383334	126427265	q	-1
NM_008209.4	Mr1	275.885	-0.0155837	0.190635	-0.0817465	0.934848	0.967881	0.0141779	NM_008209	15064	major histocompatibility complex, class I-related [Source:MGI Symbol;Acc:MGI:1195463]	15064	1	155003023	155022560	q	-1
NM_001252433.1	Dlg1	2427.73	0.0131324	0.192392	0.0682585	0.94558	0.973883	0.0114932	NM_001252433	13383	discs large MAGUK scaffold protein 1 [Source:MGI Symbol;Acc:MGI:107231]	13383	16	31482261	31693947	q	1
NM_001161538.1	Islr2	429.495	0.0367042	0.536142	0.0684599	0.94542	0.973883	0.0114932	NM_001161538	320563	immunoglobulin superfamily containing leucine-rich repeat 2 [Source:MGI Symbol;Acc:MGI:2444277]	320563	9	58103580	58111602	q	-1
NM_007549.2	Blk	21.0234	-0.0126073	0.231045	-0.0545663	0.956484	0.976959	0.0101236	NM_007549	12143	B lymphoid kinase [Source:MGI Symbol;Acc:MGI:88169]	12143	14	63610285	63654486	q	-1
NM_009810.2	Casp3	236.648	0.00897044	0.11517	0.0778888	0.937917	0.976959	0.0101236	NM_009810	12367	caspase 3 [Source:MGI Symbol;Acc:MGI:107739]	12367	8	47070326	47092724	q	1
NM_011827.3	Hcst	28.4193	0.0129763	0.230017	0.0564147	0.955011	0.976959	0.0101236	NM_011827	23900	hematopoietic cell signal transducer [Source:MGI Symbol;Acc:MGI:1344360]	23900	7	30117137	30119279	q	-1
NM_008324.1	Ido1	29.6381	0.0193166	0.268327	0.0719892	0.94261	0.976959	0.0101236	NM_008324	15930	indoleamine 2,3-dioxygenase 1 [Source:MGI Symbol;Acc:MGI:96416]	15930	8	25074152	25087025	q	-1
NM_008366.3	Il2	21.2884	0.0167091	0.230611	0.0724558	0.942239	0.976959	0.0101236	NM_008366	16183	interleukin 2 [Source:MGI Symbol;Acc:MGI:96548]	16183	3	37174672	37180108	q	-1
NM_172786.2	Il20ra	76.9364	-0.0146552	0.267546	-0.0547766	0.956316	0.976959	0.0101236	NM_172786	237313	interleukin 20 receptor, alpha [Source:MGI Symbol;Acc:MGI:3605069]	237313	10	19588318	19635801	q	1
NM_080729.3	Il25	25.23	0.0148492	0.247557	0.059983	0.952169	0.976959	0.0101236	NM_080729	140806	interleukin 25 [Source:MGI Symbol;Acc:MGI:2155888]	140806	14	55170152	55173294	q	1
NM_001008700.3	Il4ra	335.006	-0.0118342	0.185726	-0.0637187	0.949194	0.976959	0.0101236	NM_001008700	16190	interleukin 4 receptor, alpha [Source:MGI Symbol;Acc:MGI:105367]	16190	7	125151292	125178646	q	1
NM_010583.3	Itk	22.5782	0.0154161	0.231588	0.0665669	0.946926	0.976959	0.0101236	NM_010583	16428	IL2 inducible T cell kinase [Source:MGI Symbol;Acc:MGI:96621]	16428	11	46215977	46280342	q	-1
NM_177749.4	Kir3dl1/2	26.1063	-0.0150109	0.267769	-0.0560593	0.955295	0.976959	0.0101236	NM_177749	245616	killer cell immunoglobulin-like receptor, three domains, long cytoplasmic tail, 1 [Source:MGI Symbol;Acc:MGI:2652397]	245616	X	135418748	135435058	q	1
NM_001159649.1	Lax1	21.2636	0.0157009	0.224258	0.0700126	0.944184	0.976959	0.0101236	NM_001159649	240754	lymphocyte transmembrane adaptor 1 [Source:MGI Symbol;Acc:MGI:2443362]	240754	1	133606829	133617846	q	-1
NM_001355585.1	Pik3r3	2040.03	-0.00574648	0.0882241	-0.065135	0.948067	0.976959	0.0101236	NM_001355585	18710	phosphoinositide-3-kinase regulatory subunit 3 [Source:MGI Symbol;Acc:MGI:109277]	18710	4	116078815	116160253	q	1
NM_011364.4	Sh2d1a	24.7477	-0.0171166	0.238854	-0.0716612	0.942872	0.976959	0.0101236	NM_011364	20400	SH2 domain containing 1A [Source:MGI Symbol;Acc:MGI:1328352]	20400	X	41591330	41618207	q	1
NM_009404.3	Tnfsf9	26.1023	0.0145937	0.228454	0.06388	0.949066	0.976959	0.0101236	NM_009404	21950	tumor necrosis factor (ligand) superfamily, member 9 [Source:MGI Symbol;Acc:MGI:1101058]	21950	17	57412325	57414757	q	1
NM_010781.3	Tpsb2	21.2342	0.0142781	0.234166	0.0609743	0.95138	0.976959	0.0101236	NM_010781	17229	tryptase beta 2 [Source:MGI Symbol;Acc:MGI:96942]	17229	17	25585170	25588079	q	1
NM_016704.2	C6	22.5535	-0.0136836	0.228825	-0.0597993	0.952315	0.978618	0.00938676	NM_016704	12274	complement component 6 [Source:MGI Symbol;Acc:MGI:88233]	12274	15	4756657	4844449	q	1
NM_027102.3	Esam	547.065	-0.00615077	0.103832	-0.0592375	0.952763	0.978618	0.00938676	NM_027102	69524	endothelial cell-specific adhesion molecule [Source:MGI Symbol;Acc:MGI:1916774]	69524	9	37439374	37449615	q	1
NM_019577.5	Ccl24	21.0509	-0.0114166	0.232593	-0.0490841	0.960852	0.979149	0.0091513	NM_019577	56221	C-C motif chemokine ligand 24 [Source:MGI Symbol;Acc:MGI:1928953]	56221	5	135598791	135601903	q	-1
NM_010121.3	Eif2ak3	435.592	-0.00622189	0.129093	-0.0481969	0.961559	0.979149	0.0091513	NM_010121	13666	eukaryotic translation initiation factor 2 alpha kinase 3 [Source:MGI Symbol;Acc:MGI:1341830]	13666	6	70821499	70882229	q	1
NM_011674.4	Ugt8a	4889.57	-0.00757103	0.140819	-0.0537643	0.957123	0.980436	0.00858082	NM_011674	22239	UDP galactosyltransferase 8A [Source:MGI Symbol;Acc:MGI:109522]	22239	3	125658920	125732268	q	-1
NM_013599.2	Mmp9	34.5227	-0.00854622	0.192514	-0.0443927	0.964591	0.980741	0.00844554	NM_013599	17395	matrix metallopeptidase 9 [Source:MGI Symbol;Acc:MGI:97011]	17395	2	164782700	164797770	q	1
NM_010634.3	Fabp5	6182.83	0.00584816	0.122682	0.0476692	0.96198	0.982759	0.0075529	NM_010634	16592	fatty acid binding protein 5, epidermal [Source:MGI Symbol;Acc:MGI:101790]	16592	3	10077608	10081667	q	1
NM_029767.2	Rps9	13228.9	-0.00283712	0.0596418	-0.0475693	0.96206	0.982759	0.0075529	NM_029767	76846	ribosomal protein S9 [Source:MGI Symbol;Acc:MGI:1924096]	76846	7	3706992	3709896	q	1
NM_008356.3	Il13ra2	21.3974	0.00923968	0.235361	0.0392574	0.968685	0.983407	0.0072668	NM_008356	16165	interleukin 13 receptor, alpha 2 [Source:MGI Symbol;Acc:MGI:1277954]	16165	X	146166472	146212188	q	-1
NM_010560.2	Il6st	1361.74	0.00259425	0.073295	0.0353946	0.971765	0.985037	0.00654765	NM_010560	16195	interleukin 6 signal transducer [Source:MGI Symbol;Acc:MGI:96560]	16195	13	112600604	112646620	q	1
NM_013871.3	Mapk12	50.1461	0.00666992	0.167845	0.0397385	0.968302	0.986547	0.00588227	NM_013871	29857	mitogen-activated protein kinase 12 [Source:MGI Symbol;Acc:MGI:1353438]	29857	15	89014787	89024906	q	-1
NM_008413.2	Jak2	1911.45	0.00368811	0.117033	0.0315134	0.97486	0.986677	0.00582517	NM_008413	16452	Janus kinase 2 [Source:MGI Symbol;Acc:MGI:96629]	16452	19	29229228	29290480	q	1
NM_153098.3	Cd109	108.12	0.0088416	0.27774	0.0318341	0.974604	0.986863	0.00574332	NM_153098	235505	CD109 antigen [Source:MGI Symbol;Acc:MGI:2445221]	235505	9	78522828	78623535	q	1
NM_009849.2	Entpd2	287.416	0.0039735	0.133169	0.029838	0.976196	0.986863	0.00574332	NM_009849	12496	ectonucleoside triphosphate diphosphohydrolase 2 [Source:MGI Symbol;Acc:MGI:1096863]	12496	2	25285886	25291333	q	1
NM_172382.2	Kdm4a	705.682	-0.00302606	0.101784	-0.0297301	0.976282	0.986863	0.00574332	NM_172382	230674	lysine (K)-specific demethylase 4A [Source:MGI Symbol;Acc:MGI:2446210]	230674	4	117994154	118037240	q	-1
NM_009483.1	Kdm6a	690.61	0.00629201	0.174778	0.036	0.971282	0.986863	0.00574332	NM_009483	22289	lysine (K)-specific demethylase 6A [Source:MGI Symbol;Acc:MGI:1095419]	22289	X	18028814	18146175	q	1
NM_001170537.1	Mef2c	4374.86	-0.00485775	0.131904	-0.0368278	0.970622	0.986863	0.00574332	NM_001170537	17260	myocyte enhancer factor 2C [Source:MGI Symbol;Acc:MGI:99458]	17260	13	83652153	83815199	q	1
NM_138666.3	Nlgn1	5543.29	-0.00421576	0.167778	-0.025127	0.979954	0.987497	0.00546432	NM_138666	192167	neuroligin 1 [Source:MGI Symbol;Acc:MGI:2179435]	192167	3	25480379	26386609	q	-1
NM_009238.2	Sox4	489.243	-0.00690463	0.289534	-0.0238474	0.980974	0.987497	0.00546432	NM_009238	20677	SRY (sex determining region Y)-box 4 [Source:MGI Symbol;Acc:MGI:98366]	20677	13	29132902	29137696	q	-1
NM_009850.2	Cd3g	21.1793	0.00615149	0.226242	0.0271899	0.978308	0.987512	0.00545751	NM_009850	12502	CD3 antigen, gamma polypeptide [Source:MGI Symbol;Acc:MGI:88333]	12502	9	44880870	44891729	q	-1
NM_010584.3	Itln1	21.1833	0.00626856	0.234155	0.026771	0.978642	0.987512	0.00545751	NM_010584	16429	intelectin 1 (galactofuranose binding) [Source:MGI Symbol;Acc:MGI:1333831]	16429	1	171345690	171362862	q	-1
NM_001110208.1	Akt2	2741.71	-0.0036538	0.163204	-0.022388	0.982138	0.989394	0.00463088	NM_001110208	11652	thymoma viral proto-oncogene 2 [Source:MGI Symbol;Acc:MGI:104874]	11652	7	27290977	27340251	q	1
NM_009747.2	Bdkrb2	24.1112	0.0047667	0.230055	0.0207198	0.983469	0.989394	0.00463088	NM_009747	12062	bradykinin receptor, beta 2 [Source:MGI Symbol;Acc:MGI:102845]	12062	12	105529485	105561496	q	1
NM_001039195.1	Gria2	9070.97	-0.00248607	0.248154	-0.0100182	0.992007	0.997276	0.00118448	NM_001039195	14800	glutamate receptor, ionotropic, AMPA2 (alpha 2) [Source:MGI Symbol;Acc:MGI:95809]	14800	3	80588757	80710142	q	-1
NM_147176.2	Homer1	5693.95	0.00110483	0.254359	0.00434358	0.996534	0.997853	0.000933648	NM_147176	26556	homer scaffolding protein 1 [Source:MGI Symbol;Acc:MGI:1347345]	26556	13	93436143	93541637	q	1
NM_008608.3	Mmp14	273.383	0.00104341	0.182626	0.00571338	0.995441	0.997853	0.000933648	NM_008608	17387	matrix metallopeptidase 14 (membrane-inserted) [Source:MGI Symbol;Acc:MGI:101900]	17387	14	54669069	54682821	q	1
NM_011888.2	Ccl19	34.7832	0.000652124	0.27888	0.00233837	0.998134	0.998134	0.00081104	NM_011888	24047	C-C motif chemokine ligand 19 [Source:MGI Symbol;Acc:MGI:1346316]	24047	4	42754525	42756577	q	-1
NM_009909.3	Cxcr2	22.5809	0.00064292	0.224139	0.0028684	0.997711	0.998134	0.00081104	NM_009909	12765	C-X-C motif chemokine receptor 2 [Source:MGI Symbol;Acc:MGI:105303]	12765	1	74193150	74200405	q	1
NM_010553.2	Il18rap	39.0597	0.00118527	0.255932	0.00463121	0.996305	0.998134	0.00081104	NM_010553	16174	interleukin 18 receptor accessory protein [Source:MGI Symbol;Acc:MGI:1338888]	16174	1	40554522	40590865	q	1
NM_011949.3	Mapk1	10140.2	0.000986933	0.142315	0.00693485	0.994467	0.998134	0.00081104	NM_011949	26413	mitogen-activated protein kinase 1 [Source:MGI Symbol;Acc:MGI:1346858]	26413	16	16801246	16865317	q	1
NM_145700.2	Ackr4	20.1439	-0.121274	0.22622	-0.536087	0.591898	NA	#VALUE!	NM_145700	252837	atypical chemokine receptor 4 [Source:MGI Symbol;Acc:MGI:2181676]	252837	9	103961356	104004132	q	-1
NM_009660.3	Alox15	20.1439	-0.121274	0.22622	-0.536087	0.591898	NA	#VALUE!	NM_009660	11687	arachidonate 15-lipoxygenase [Source:MGI Symbol;Acc:MGI:87997]	11687	11	70234978	70242857	q	-1
NM_016767.2	Batf	20.1439	-0.121274	0.22622	-0.536087	0.591898	NA	#VALUE!	NM_016767	53314	basic leucine zipper transcription factor, ATF-like [Source:MGI Symbol;Acc:MGI:1859147]	53314	12	85733443	85755861	q	1
NM_011329.2	Ccl1	20.1439	-0.121274	0.22622	-0.536087	0.591898	NA	#VALUE!	NM_011329	20290	C-C motif chemokine ligand 1 [Source:MGI Symbol;Acc:MGI:98258]	20290	11	82067483	82196516	q	-1
NM_016960.1	Ccl20	20.636	-0.133206	0.22377	-0.595281	0.551656	NA	#VALUE!	NM_016960	20297	C-C motif chemokine ligand 20 [Source:MGI Symbol;Acc:MGI:1329031]	20297	1	83094487	83096888	q	1
NM_001013412.2	Ccl26	20.1439	-0.121274	0.22622	-0.536087	0.591898	NA	#VALUE!	NM_001013412	541307	C-C motif chemokine ligand 26 [Source:MGI Symbol;Acc:MGI:3589281]	541307	5	135589302	135592423	q	-1
NM_009912.4	Ccr1	20.4554	-0.0811129	0.225442	-0.359795	0.719001	NA	#VALUE!	NM_009912	12768	C-C motif chemokine receptor 1 [Source:MGI Symbol;Acc:MGI:104618]	12768	9	123762161	123768729	q	-1
NM_007720.2	Ccr8	20.1439	-0.121274	0.22622	-0.536087	0.591898	NA	#VALUE!	NM_007720	12776	C-C motif chemokine receptor 8 [Source:MGI Symbol;Acc:MGI:1201402]	12776	9	119921180	119923972	q	1
NM_009844.2	Cd19	20.1439	-0.121274	0.22622	-0.536087	0.591898	NA	#VALUE!	NM_009844	12478	CD19 antigen [Source:MGI Symbol;Acc:MGI:88319]	12478	7	126007622	126014061	q	-1
NM_130905.2	Cd209e	20.6378	-0.108963	0.224193	-0.486024	0.62695	NA	#VALUE!	NM_130905	170780	CD209e antigen [Source:MGI Symbol;Acc:MGI:2157948]	170780	8	3897965	3904309	q	-1
NM_007648.4	Cd3e	20.571	-0.190999	0.224573	-0.850497	0.395049	NA	#VALUE!	NM_007648	12501	CD3 antigen, epsilon polypeptide [Source:MGI Symbol;Acc:MGI:88332]	12501	9	44910038	44920925	q	-1
NM_011616.2	Cd40lg	20.3074	-0.10075	0.225872	-0.446047	0.655563	NA	#VALUE!	NM_011616	21947	CD40 ligand [Source:MGI Symbol;Acc:MGI:88337]	21947	X	56257503	56269402	q	1
NM_001033122.3	Cd69	20.1439	-0.121274	0.22622	-0.536087	0.591898	NA	#VALUE!	NM_001033122	12515	CD69 antigen [Source:MGI Symbol;Acc:MGI:88343]	12515	6	129244288	129252399	q	-1
NM_007655.3	Cd79a	20.2218	-0.111126	0.225811	-0.49212	0.622635	NA	#VALUE!	NM_007655	12518	CD79A antigen (immunoglobulin-associated alpha) [Source:MGI Symbol;Acc:MGI:101774]	12518	7	24596806	24601622	q	1
NM_001081110.2	Cd8a	20.2294	-0.135497	0.225614	-0.60057	0.548126	NA	#VALUE!	NM_001081110	12525	CD8 subunit alpha [Source:MGI Symbol;Acc:MGI:88346]	12525	6	71350411	71356157	q	1
NM_009858.2	Cd8b1	20.1439	-0.121274	0.22622	-0.536087	0.591898	NA	#VALUE!	NM_009858	12526	CD8 subunit beta 1 [Source:MGI Symbol;Acc:MGI:88347]	12526	6	71299772	71314478	q	1
NM_032465.2	Cd96	20.1439	-0.121274	0.22622	-0.536087	0.591898	NA	#VALUE!	NM_032465	84544	CD96 antigen [Source:MGI Symbol;Acc:MGI:1934368]	84544	16	45856020	45940614	q	-1
NM_009864.2	Cdh1	20.3915	-0.115388	0.225012	-0.512807	0.608086	NA	#VALUE!	NM_009864	12550	cadherin 1 [Source:MGI Symbol;Acc:MGI:88354]	12550	8	107329983	107396878	q	1
NM_013459.1	Cfd	20.1439	-0.121274	0.22622	-0.536087	0.591898	NA	#VALUE!	NM_013459	11537	complement factor D [Source:MGI Symbol;Acc:MGI:87931]	11537	10	79726687	79728489	q	1
NM_007768.4	Crp	20.1439	-0.121274	0.22622	-0.536087	0.591898	NA	#VALUE!	NM_007768	12944	C-reactive protein, pentraxin-related [Source:MGI Symbol;Acc:MGI:88512]	12944	1	172525622	172660598	q	1
NM_009969.4	Csf2	20.3148	-0.149579	0.225141	-0.66438	0.506447	NA	#VALUE!	NM_009969	12981	colony stimulating factor 2 (granulocyte-macrophage) [Source:MGI Symbol;Acc:MGI:1339752]	12981	11	54138097	54140493	q	-1
NM_009971.1	Csf3	20.1439	-0.121274	0.22622	-0.536087	0.591898	NA	#VALUE!	NM_009971	12985	colony stimulating factor 3 (granulocyte) [Source:MGI Symbol;Acc:MGI:1339751]	12985	11	98592089	98594455	q	1
NM_009843.4	Ctla4	20.5333	-0.0712517	0.225606	-0.315824	0.752136	NA	#VALUE!	NM_009843	12477	cytotoxic T-lymphocyte-associated protein 4 [Source:MGI Symbol;Acc:MGI:88556]	12477	1	60926159	60954991	q	1
NM_011339.2	Cxcl15	20.1439	-0.121274	0.22622	-0.536087	0.591898	NA	#VALUE!	NM_011339	20309	C-X-C motif chemokine ligand 15 [Source:MGI Symbol;Acc:MGI:1339941]	20309	5	90942393	90950926	q	1
NM_153576.2	Cxcl17	20.1439	-0.121274	0.22622	-0.536087	0.591898	NA	#VALUE!	NM_153576	232983	C-X-C motif chemokine ligand 17 [Source:MGI Symbol;Acc:MGI:2387642]	232983	7	25099478	25112311	q	-1
NM_009140.2	Cxcl2	20.1439	-0.121274	0.22622	-0.536087	0.591898	NA	#VALUE!	NM_009140	20310	C-X-C motif chemokine ligand 2 [Source:MGI Symbol;Acc:MGI:1340094]	20310	5	91051730	91053797	q	1
NM_178241.4	Cxcr1	20.1439	-0.121274	0.22622	-0.536087	0.591898	NA	#VALUE!	NM_178241	227288	C-X-C motif chemokine receptor 1 [Source:MGI Symbol;Acc:MGI:2448715]	227288	1	74230944	74233790	q	-1
NM_183026.2	Defb14	20.1439	-0.121274	0.22622	-0.536087	0.591898	NA	#VALUE!	NM_183026	244332	defensin beta 14 [Source:MGI Symbol;Acc:MGI:2675345]	244332	8	19244373	19245228	q	1
NM_001029984.2	Fcrlb	20.1439	-0.121274	0.22622	-0.536087	0.591898	NA	#VALUE!	NM_001029984	435653	Fc receptor-like B [Source:MGI Symbol;Acc:MGI:3576487]	435653	1	170734842	170740510	q	-1
NM_054039.2	Foxp3	20.1439	-0.121274	0.22622	-0.536087	0.591898	NA	#VALUE!	NM_054039	20371	forkhead box P3 [Source:MGI Symbol;Acc:MGI:1891436]	20371	X	7439883	7461484	q	1
NM_010370.2	Gzma	20.2218	-0.111126	0.225811	-0.49212	0.622635	NA	#VALUE!	NM_010370	14938	granzyme A [Source:MGI Symbol;Acc:MGI:109266]	14938	13	113230359	113237515	q	-1
NM_013542.2	Gzmb	20.1439	-0.121274	0.22622	-0.536087	0.591898	NA	#VALUE!	NM_013542	14939	granzyme B [Source:MGI Symbol;Acc:MGI:109267]	14939	14	56496295	56499717	q	-1
NM_010371.2	Gzmc	20.1439	-0.121274	0.22622	-0.536087	0.591898	NA	#VALUE!	NM_010371	14940	granzyme C [Source:MGI Symbol;Acc:MGI:109256]	14940	14	56468898	56472113	q	-1
NM_010372.2	Gzmd	20.1439	-0.121274	0.22622	-0.536087	0.591898	NA	#VALUE!	NM_010372	14941	granzyme D [Source:MGI Symbol;Acc:MGI:109255]	14941	14	56367013	56370065	q	-1
NM_010373.3	Gzme	20.1439	-0.121274	0.22622	-0.536087	0.591898	NA	#VALUE!	NM_010373	14942	granzyme E [Source:MGI Symbol;Acc:MGI:109265]	14942	14	56355083	56358082	q	-1
NM_008196.1	Gzmk	20.1439	-0.121274	0.22622	-0.536087	0.591898	NA	#VALUE!	NM_008196	14945	granzyme K [Source:MGI Symbol;Acc:MGI:1298232]	14945	13	113308142	113362442	q	-1
NM_153052.1	Gzmn	20.1439	-0.121274	0.22622	-0.536087	0.591898	NA	#VALUE!	NM_153052	245839	granzyme N [Source:MGI Symbol;Acc:MGI:2675494]	245839	14	56403254	56412056	q	-1
ENSMUST00000182803.1	H2-Pa	20.1439	-0.121274	0.22622	-0.536087	0.591898	NA	#VALUE!	ENSMUST00000182803	NA	NA	NA	NA	NA	NA	NA	NA
NM_032541.2	Hamp	20.1439	-0.121274	0.22622	-0.536087	0.591898	NA	#VALUE!	NM_032541	84506	hepcidin antimicrobial peptide [Source:MGI Symbol;Acc:MGI:1933533]	84506	7	30641793	30643457	q	-1
NM_010406.1	Hc	20.1439	-0.121274	0.22622	-0.536087	0.591898	NA	#VALUE!	NM_010406	15139	hemolytic complement [Source:MGI Symbol;Acc:MGI:96031]	15139	2	34873343	34951450	q	-1
NM_010503.2	Ifna2	20.4625	-0.0808364	0.225076	-0.359152	0.719482	NA	#VALUE!	NM_010503	15965	interferon alpha 2 [Source:MGI Symbol;Acc:MGI:107666]	15965	4	88601118	88602149	q	-1
NM_010510.1	Ifnb1	20.1439	-0.121274	0.22622	-0.536087	0.591898	NA	#VALUE!	NM_010510	15977	interferon beta 1, fibroblast [Source:MGI Symbol;Acc:MGI:107657]	15977	4	88440262	88441011	q	-1
NM_008337.3	Ifng	20.1439	-0.121274	0.22622	-0.536087	0.591898	NA	#VALUE!	NM_008337	15978	interferon gamma [Source:MGI Symbol;Acc:MGI:107656]	15978	10	118276951	118281797	q	1
NM_199157.2	Ifnk	20.3042	-0.100871	0.225738	-0.446849	0.654984	NA	#VALUE!	NM_199157	387510	interferon kappa [Source:MGI Symbol;Acc:MGI:2683287]	387510	4	35152056	35154005	q	1
NM_001024673.2	Ifnl2/3	20.1439	-0.121274	0.22622	-0.536087	0.591898	NA	#VALUE!	NM_001024673	330496	interferon lambda 2 [Source:MGI Symbol;Acc:MGI:3647279]	330496	7	28208261	28209880	q	-1
NM_010548.2	Il10	20.1439	-0.121274	0.22622	-0.536087	0.591898	NA	#VALUE!	NM_010548	16153	interleukin 10 [Source:MGI Symbol;Acc:MGI:96537]	16153	1	130947582	130952711	q	1
NM_008350.2	Il11	20.2331	-0.135683	0.225751	-0.601026	0.547823	NA	#VALUE!	NM_008350	16156	interleukin 11 [Source:MGI Symbol;Acc:MGI:107613]	16156	7	4775372	4785858	q	-1
NM_001303244.1	Il12b	20.571	-0.190999	0.224573	-0.850497	0.395049	NA	#VALUE!	NM_001303244	16160	interleukin 12b [Source:MGI Symbol;Acc:MGI:96540]	16160	11	44290890	44304860	q	1
NM_008355.3	Il13	20.1439	-0.121274	0.22622	-0.536087	0.591898	NA	#VALUE!	NM_008355	16163	interleukin 13 [Source:MGI Symbol;Acc:MGI:96541]	16163	11	53522151	53525529	q	-1
NM_019508.1	Il17b	20.1439	-0.121274	0.22622	-0.536087	0.591898	NA	#VALUE!	NM_019508	56069	interleukin 17B [Source:MGI Symbol;Acc:MGI:1928397]	56069	18	61817958	61825609	q	1
NM_145834.3	Il17c	20.1439	-0.121274	0.22622	-0.536087	0.591898	NA	#VALUE!	NM_145834	234836	interleukin 17C [Source:MGI Symbol;Acc:MGI:2446486]	234836	8	123148759	123150378	q	1
NM_001009940.2	Il19	20.1439	-0.121274	0.22622	-0.536087	0.591898	NA	#VALUE!	NM_001009940	329244	interleukin 19 [Source:MGI Symbol;Acc:MGI:1890472]	329244	1	130860393	130867852	q	-1
NM_153077.2	Il1f10	20.1439	-0.121274	0.22622	-0.536087	0.591898	NA	#VALUE!	NM_153077	215274	interleukin 1 family, member 10 [Source:MGI Symbol;Acc:MGI:2652548]	215274	2	24181208	24183832	q	1
NM_019451.2	Il1f5	20.1439	-0.121274	0.22622	-0.536087	0.591898	NA	#VALUE!	NM_019451	54450	interleukin 36 receptor antagonist [Source:MGI Symbol;Acc:MGI:1859325]	54450	2	24166966	24173438	q	1
NM_019450.3	Il1f6	20.1439	-0.121274	0.22622	-0.536087	0.591898	NA	#VALUE!	NM_019450	54448	interleukin 36A [Source:MGI Symbol;Acc:MGI:1859324]	54448	2	24105430	24115714	q	1
NM_027163.4	Il1f8	20.6387	-0.0603699	0.227192	-0.265721	0.790454	NA	#VALUE!	NM_027163	69677	interleukin 36B [Source:MGI Symbol;Acc:MGI:1916927]	69677	2	24043173	24050531	q	1
NM_153511.2	Il1f9	20.1439	-0.121274	0.22622	-0.536087	0.591898	NA	#VALUE!	NM_153511	215257	interleukin 36G [Source:MGI Symbol;Acc:MGI:2449929]	215257	2	24076488	24083580	q	1
NM_021380.1	Il20	20.6228	-0.0856805	0.225152	-0.380545	0.703541	NA	#VALUE!	NM_021380	58181	interleukin 20 [Source:MGI Symbol;Acc:MGI:1890473]	58181	1	130834722	130839188	q	-1
NM_021782.2	Il21	20.1439	-0.121274	0.22622	-0.536087	0.591898	NA	#VALUE!	NM_021782	60505	interleukin 21 [Source:MGI Symbol;Acc:MGI:1890474]	60505	3	37276908	37286785	q	-1
NM_178257.1	Il22ra1	20.1439	-0.121274	0.22622	-0.536087	0.591898	NA	#VALUE!	NM_178257	230828	interleukin 22 receptor, alpha 1 [Source:MGI Symbol;Acc:MGI:2663588]	230828	4	135455483	135479451	q	1
NM_053095.2	Il24	20.1439	-0.121274	0.22622	-0.536087	0.591898	NA	#VALUE!	NM_053095	93672	interleukin 24 [Source:MGI Symbol;Acc:MGI:2135548]	93672	1	130809811	130815191	q	-1
NM_145636.1	Il27	20.1439	-0.121274	0.22622	-0.536087	0.591898	NA	#VALUE!	NM_145636	246779	interleukin 27 [Source:MGI Symbol;Acc:MGI:2384409]	246779	7	126188182	126194113	q	-1
NM_016671.3	Il27ra	20.1439	-0.121274	0.22622	-0.536087	0.591898	NA	#VALUE!	NM_016671	50931	interleukin 27 receptor, alpha [Source:MGI Symbol;Acc:MGI:1355318]	50931	8	84756923	84769218	q	-1
NM_008367.2	Il2ra	20.1439	-0.121274	0.22622	-0.536087	0.591898	NA	#VALUE!	NM_008367	16184	interleukin 2 receptor, alpha chain [Source:MGI Symbol;Acc:MGI:96549]	16184	2	11647618	11698004	q	1
NM_010556.4	Il3	20.1439	-0.121274	0.22622	-0.536087	0.591898	NA	#VALUE!	NM_010556	16187	interleukin 3 [Source:MGI Symbol;Acc:MGI:96552]	16187	11	54156129	54158103	q	-1
NM_029594.1	Il31	20.1439	-0.121274	0.22622	-0.536087	0.591898	NA	#VALUE!	NM_029594	76399	interleukin 31 [Source:MGI Symbol;Acc:MGI:1923649]	76399	5	123618220	123627552	q	-1
NM_139299.2	Il31ra	20.5333	-0.0712517	0.225606	-0.315824	0.752136	NA	#VALUE!	NM_139299	218624	interleukin 31 receptor A [Source:MGI Symbol;Acc:MGI:2180511]	218624	13	112656432	112730894	q	-1
NM_021283.1	Il4	20.1439	-0.121274	0.22622	-0.536087	0.591898	NA	#VALUE!	NM_021283	16189	interleukin 4 [Source:MGI Symbol;Acc:MGI:96556]	16189	11	53493809	53509496	q	-1
NM_010558.1	Il5	20.1439	-0.121274	0.22622	-0.536087	0.591898	NA	#VALUE!	NM_010558	16191	interleukin 5 [Source:MGI Symbol;Acc:MGI:96557]	16191	11	53611621	53615933	q	1
NM_031168.1	Il6	20.1439	-0.121274	0.22622	-0.536087	0.591898	NA	#VALUE!	NM_031168	16193	interleukin 6 [Source:MGI Symbol;Acc:MGI:96559]	16193	5	30218112	30224979	q	1
NM_008373.1	Il9	20.1439	-0.121274	0.22622	-0.536087	0.591898	NA	#VALUE!	NM_008373	16198	interleukin 9 [Source:MGI Symbol;Acc:MGI:96563]	16198	13	56627090	56630059	q	-1
NM_008399.1	Itgae	20.1439	-0.121274	0.22622	-0.536087	0.591898	NA	#VALUE!	NM_008399	16407	integrin alpha E, epithelial-associated [Source:MGI Symbol;Acc:MGI:1298377]	16407	11	72981409	73038272	q	1
NM_016659.3	Klra1	20.2241	-0.111036	0.225904	-0.491519	0.623059	NA	#VALUE!	NM_016659	16627	killer cell lectin-like receptor, subfamily A, member 1 [Source:MGI Symbol;Acc:MGI:101907]	16627	6	130340880	130363837	q	-1
NM_001099918.1	Klrb1	20.3776	-0.0910456	0.22542	-0.403893	0.686292	NA	#VALUE!	NM_001099918	100043861	killer cell lectin-like receptor subfamily B member 1 [Source:MGI Symbol;Acc:MGI:96877]	100043861	6	128682799	128700022	q	-1
NM_001083322.1	Klrk1	20.7006	-0.051274	0.22488	-0.228006	0.819642	NA	#VALUE!	NM_001083322	27007	killer cell lectin-like receptor subfamily K, member 1 [Source:MGI Symbol;Acc:MGI:1196250]	27007	6	129587286	129600827	q	-1
NM_177356.3	Lamp3	20.1439	-0.121274	0.22622	-0.536087	0.591898	NA	#VALUE!	NM_177356	239739	lysosomal-associated membrane protein 3 [Source:MGI Symbol;Acc:MGI:2441659]	239739	16	19472128	19525125	q	-1
NM_010689.2	Lat	20.1439	-0.121274	0.22622	-0.536087	0.591898	NA	#VALUE!	NM_010689	16797	linker for activation of T cells [Source:MGI Symbol;Acc:MGI:1342293]	16797	7	125962996	125968742	q	-1
NM_011090.2	Lilra6	20.1439	-0.121274	0.22622	-0.536087	0.591898	NA	#VALUE!	NM_011090	18726	leukocyte immunoglobulin-like receptor, subfamily A (with TM domain), member 6 [Source:MGI Symbol;Acc:MGI:1195969]	18726	7	3911279	3918502	q	-1
NM_029796.2	Lrg1	20.1439	-0.121274	0.22622	-0.536087	0.591898	NA	#VALUE!	NM_029796	76905	leucine-rich alpha-2-glycoprotein 1 [Source:MGI Symbol;Acc:MGI:1924155]	76905	17	56426678	56429001	q	-1
NM_008522.3	Ltf	20.1439	-0.121274	0.22622	-0.536087	0.591898	NA	#VALUE!	NM_008522	17002	lactotransferrin [Source:MGI Symbol;Acc:MGI:96837]	17002	9	110848339	110871835	q	1
NM_011950.1	Mapk13	20.1439	-0.121274	0.22622	-0.536087	0.591898	NA	#VALUE!	NM_011950	26415	mitogen-activated protein kinase 13 [Source:MGI Symbol;Acc:MGI:1346864]	26415	17	28988271	28999207	q	1
NM_010766.2	Marco	20.1439	-0.121274	0.22622	-0.536087	0.591898	NA	#VALUE!	NM_010766	17167	macrophage receptor with collagenous structure [Source:MGI Symbol;Acc:MGI:1309998]	17167	1	120402267	120432753	q	-1
NM_007641.5	Ms4a1	20.1439	-0.121274	0.22622	-0.536087	0.591898	NA	#VALUE!	NM_007641	12482	membrane-spanning 4-domains, subfamily A, member 1 [Source:MGI Symbol;Acc:MGI:88321]	12482	19	11227039	11243605	q	-1
NM_001276330.1	Ms4a2	20.1439	-0.121274	0.22622	-0.536087	0.591898	NA	#VALUE!	NM_001276330	14126	membrane-spanning 4-domains, subfamily A, member 2 [Source:MGI Symbol;Acc:MGI:95495]	14126	19	11592887	11601083	q	-1
NM_010746.3	Ncr1	20.1439	-0.121274	0.22622	-0.536087	0.591898	NA	#VALUE!	NM_010746	17086	natural cytotoxicity triggering receptor 1 [Source:MGI Symbol;Acc:MGI:1336212]	17086	7	4340723	4348163	q	1
NM_024253.4	Nkg7	20.1439	-0.121274	0.22622	-0.536087	0.591898	NA	#VALUE!	NM_024253	72310	natural killer cell group 7 sequence [Source:MGI Symbol;Acc:MGI:1931250]	72310	7	43086497	43087673	q	1
NM_001004142.2	Nlrp1a	20.1439	-0.121274	0.22622	-0.536087	0.591898	NA	#VALUE!	NM_001004142	195046	NLR family, pyrin domain containing 1A [Source:MGI Symbol;Acc:MGI:2684861]	195046	11	70983062	71035530	q	-1
NM_010927.3	Nos2	20.2241	-0.111036	0.225904	-0.491519	0.623059	NA	#VALUE!	NM_010927	18126	nitric oxide synthase 2, inducible [Source:MGI Symbol;Acc:MGI:97361]	18126	11	78811613	78851080	q	1
NM_145226.2	Oas3	20.1439	-0.121274	0.22622	-0.536087	0.591898	NA	#VALUE!	NM_145226	246727	2'-5' oligoadenylate synthetase 3 [Source:MGI Symbol;Acc:MGI:2180850]	246727	5	120891163	120915726	q	-1
NM_019732.2	Runx3	20.1439	-0.121274	0.22622	-0.536087	0.591898	NA	#VALUE!	NM_019732	12399	runt related transcription factor 3 [Source:MGI Symbol;Acc:MGI:102672]	12399	4	134847963	134905301	q	1
NM_011345.2	Sele	20.1439	-0.121274	0.22622	-0.536087	0.591898	NA	#VALUE!	NM_011345	20339	selectin, endothelial cell [Source:MGI Symbol;Acc:MGI:98278]	20339	1	163875773	163885246	q	1
NM_009896.2	Socs1	20.1439	-0.121274	0.22622	-0.536087	0.591898	NA	#VALUE!	NM_009896	12703	suppressor of cytokine signaling 1 [Source:MGI Symbol;Acc:MGI:1354910]	12703	16	10600104	10603400	q	-1
NM_019866.1	Spib	20.1439	-0.121274	0.22622	-0.536087	0.591898	NA	#VALUE!	NM_019866	272382	Spi-B transcription factor (Spi-1/PU.1 related) [Source:MGI Symbol;Acc:MGI:892986]	272382	7	44175417	44181495	q	-1
NM_011487.4	Stat4	20.1439	-0.121274	0.22622	-0.536087	0.591898	NA	#VALUE!	NM_011487	20849	signal transducer and activator of transcription 4 [Source:MGI Symbol;Acc:MGI:103062]	20849	1	52026307	52146348	q	1
NM_019507.2	Tbx21	20.2997	-0.10105	0.225541	-0.448034	0.654128	NA	#VALUE!	NM_019507	57765	T-box 21 [Source:MGI Symbol;Acc:MGI:1888984]	57765	11	96988897	97006157	q	-1
NM_009337.3	Tcl1	20.1439	-0.121274	0.22622	-0.536087	0.591898	NA	#VALUE!	NM_009337	21432	T cell lymphoma breakpoint 1 [Source:MGI Symbol;Acc:MGI:1097166]	21432	12	105183009	105189052	q	-1
NM_001146325.1	Tigit	20.1439	-0.121274	0.22622	-0.536087	0.591898	NA	#VALUE!	NM_001146325	100043314	T cell immunoreceptor with Ig and ITIM domains [Source:MGI Symbol;Acc:MGI:3642260]	100043314	16	43469230	43484509	q	-1
NM_009400.3	Tnfrsf18	20.4002	-0.163523	0.224814	-0.727368	0.467	NA	#VALUE!	NM_009400	21936	tumor necrosis factor receptor superfamily, member 18 [Source:MGI Symbol;Acc:MGI:894675]	21936	4	156110621	156113352	q	1
NM_001077509.1	Tnfrsf9	20.1439	-0.121274	0.22622	-0.536087	0.591898	NA	#VALUE!	NM_001077509	21942	tumor necrosis factor receptor superfamily, member 9 [Source:MGI Symbol;Acc:MGI:1101059]	21942	4	150999019	151030559	q	1
NM_183391.3	Tnfsf18	20.1439	-0.121274	0.22622	-0.536087	0.591898	NA	#VALUE!	NM_183391	240873	tumor necrosis factor (ligand) superfamily, member 18 [Source:MGI Symbol;Acc:MGI:2673064]	240873	1	161322224	161332859	q	1
NM_009452.2	Tnfsf4	20.6387	-0.0603699	0.227192	-0.265721	0.790454	NA	#VALUE!	NM_009452	22164	tumor necrosis factor (ligand) superfamily, member 4 [Source:MGI Symbol;Acc:MGI:104511]	22164	1	161222980	161245981	q	1
NM_031187.4	Tpsab1	20.1439	-0.121274	0.22622	-0.536087	0.591898	NA	#VALUE!	NM_031187	100503895	tryptase alpha/beta 1 [Source:MGI Symbol;Acc:MGI:96943]	100503895	17	25562212	25564541	q	-1
NM_001122754.1	Txk	20.1439	-0.121274	0.22622	-0.536087	0.591898	NA	#VALUE!	NM_001122754	22165	TXK tyrosine kinase [Source:MGI Symbol;Acc:MGI:102960]	22165	5	72853321	72910120	q	-1
NM_008510.1	Xcl1	20.1439	-0.121274	0.22622	-0.536087	0.591898	NA	#VALUE!	NM_008510	16963	chemokine (C motif) ligand 1 [Source:MGI Symbol;Acc:MGI:104593]	16963	1	164759213	164763096	q	-1
NM_011798.4	Xcr1	20.1439	-0.121274	0.22622	-0.536087	0.591898	NA	#VALUE!	NM_011798	23832	chemokine (C motif) receptor 1 [Source:MGI Symbol;Acc:MGI:1346338]	23832	9	123681380	123691094	q	-1

## Sheet: MG IFNAR KO TBI vs control
MG IFNAR KO TBI vs control
	external_gene_name	baseMean	log2FoldChange	lfcSE	stat	pvalue	padj	neg log10(padj)	ensembl	entrez	description	ncbi_gene_id	chrom_name	start	end	karyotype	strand
NM_019456.2	Apbb1ip	470.561	0.507446	0.162005	3.13228	0.00173452	0.0348763	1.45747	NM_019456	54519	amyloid beta precursor protein binding family B member 1 interacting protein [Source:MGI Symbol;Acc:MGI:1861354]	54519	2	22664106	22765665	q	1
NM_009139.3	Ccl6	130.995	1.80676	0.170588	10.5914	3.27e-26	1.84e-23	22.7352	NM_009139	20305	C-C motif chemokine ligand 6 [Source:MGI Symbol;Acc:MGI:98263]	20305	11	83478708	83483913	q	-1
NM_011337.2	Ccl3	77.4783	2.13388	0.220207	9.69034	3.31e-22	9.33e-20	19.0301	NM_011337	20302	C-C motif chemokine ligand 3 [Source:MGI Symbol;Acc:MGI:98260]	20302	11	83538670	83540181	q	-1
NM_007498.3	Atf3	127.347	2.04797	0.238877	8.57333	1.01e-17	3.81e-15	14.4191	NM_007498	11910	activating transcription factor 3 [Source:MGI Symbol;Acc:MGI:109384]	11910	1	190902493	190950236	q	-1
NM_020008.2	Clec7a	90.9865	2.47331	0.301245	8.21027	2.21e-16	5.57e-14	13.2541	NM_020008	NA	NA	NA	NA	NA	NA	NA	NA
NM_011338.2	Ccl9	134.093	1.3951	0.193863	7.19633	6.19e-13	1.16e-10	9.93554	NM_011338	20308	C-C motif chemokine ligand 9 [Source:MGI Symbol;Acc:MGI:104533]	20308	11	83463745	83469462	q	-1
NM_009851.2	Cd44	134.008	1.06845	0.154644	6.9091	4.88e-12	6.86e-10	9.16368	NM_009851	12505	CD44 antigen [Source:MGI Symbol;Acc:MGI:88338]	12505	2	102641486	102732010	q	-1
NM_009252.2	Serpina3n	150.846	1.89386	0.274863	6.89021	5.57e-12	1.05e-09	8.97881	NM_009252	20716	serine (or cysteine) peptidase inhibitor, clade A, member 3N [Source:MGI Symbol;Acc:MGI:105045]	20716	12	104372988	104380588	q	1
NM_009742.3	Bcl2a1a	259.449	0.984949	0.147289	6.68719	2.28e-11	3.44e-09	8.46344	NM_009742	12044	B cell leukemia/lymphoma 2 related protein A1a [Source:MGI Symbol;Acc:MGI:102687]	12044	9	88838953	88844472	q	1
NM_008479.1	Lag3	359.934	0.970182	0.161655	6.00156	1.95e-09	2.2e-07	6.65758	NM_008479	16768	lymphocyte-activation gene 3 [Source:MGI Symbol;Acc:MGI:106588]	16768	6	124881324	124888668	q	-1
NM_023158.6	Cxcl16	90.5983	1.07089	0.189058	5.66434	1.48e-08	1.38e-06	5.86012	NM_023158	66102	C-X-C motif chemokine ligand 16 [Source:MGI Symbol;Acc:MGI:1932682]	66102	11	70344809	70350810	q	-1
NM_010288.3	Gja1	9305.07	0.391964	0.0714853	5.48315	4.18e-08	5.27e-06	5.27819	NM_010288	14609	gap junction protein, alpha 1 [Source:MGI Symbol;Acc:MGI:95713]	14609	10	56253426	56278609	q	1
NM_013652.1	Ccl4	42.1294	1.26792	0.245498	5.1647	2.41e-07	1.84e-05	4.73518	NM_013652	20303	C-C motif chemokine ligand 4 [Source:MGI Symbol;Acc:MGI:98261]	20303	11	83553410	83555509	q	1
NM_011210.3	Ptprc	139.326	0.903055	0.175391	5.14881	2.62e-07	1.84e-05	4.73518	NM_011210	19264	protein tyrosine phosphatase receptor type C [Source:MGI Symbol;Acc:MGI:97810]	19264	1	137990599	138103446	q	-1
NM_013532.3	Lilrb4a	92.2042	1.17502	0.232339	5.05737	4.25e-07	4.02e-05	4.39577	NM_013532	14728	leukocyte immunoglobulin-like receptor, subfamily B, member 4A [Source:MGI Symbol;Acc:MGI:102701]	14728	10	51367052	51372707	q	1
NM_011331.2	Ccl12	126.087	1.34921	0.281783	4.78811	1.68e-06	0.000105319	3.97749	NM_011331	20293	C-C motif chemokine ligand 12 [Source:MGI Symbol;Acc:MGI:108224]	20293	11	81992671	81994226	q	1
NM_029612.4	Slamf9	123.878	1.01031	0.209061	4.83264	1.35e-06	0.000113325	3.94567	NM_029612	98365	SLAM family member 9 [Source:MGI Symbol;Acc:MGI:1923692]	98365	1	172302925	172306142	q	1
	C3ar1	220.204	0.731666	0.153304	4.77265	1.82e-06	0.000130377	3.8848	NM_009779	12267	complement component 3a receptor 1 [Source:MGI Symbol;Acc:MGI:1097680]	12267	6	122824097	122833120	q	-1
NM_030707.3	Fcrls	611.907	0.723625	0.151883	4.76436	1.89e-06	0.000130377	3.8848	NM_030707	80891	Fc receptor like 2 [Source:MGI Symbol;Acc:MGI:1933397]	80891	3	87158065	87171045	q	-1
NM_010821.1	Mpeg1	1118.68	0.67569	0.143437	4.7107	2.47e-06	0.000155736	3.80761	NM_010821	17476	macrophage expressed gene 1 [Source:MGI Symbol;Acc:MGI:1333743]	17476	19	12438143	12442649	q	1
NM_009779.2	C3ar1	226.091	0.63401	0.141503	4.48055	7.45e-06	0.000419157	3.37762	NM_009779	12267	complement component 3a receptor 1 [Source:MGI Symbol;Acc:MGI:1097680]	12267	6	122824097	122833120	q	-1
NM_001077189.1	Fcgr2b	189.829	0.882889	0.201223	4.38761	1.15e-05	0.000524596	3.28018	NM_001077189	14130	Fc receptor, IgG, low affinity IIb [Source:MGI Symbol;Acc:MGI:95499]	14130	1	170786186	170804116	q	-1
NM_001145953.1	Lgals3	154.992	1.29985	0.297072	4.37554	1.21e-05	0.000524596	3.28018	NM_001145953	16854	lectin, galactose binding, soluble 3 [Source:MGI Symbol;Acc:MGI:96778]	16854	14	47605208	47623617	q	1
NM_011905.3	Tlr2	60.9128	1.01953	0.231553	4.40299	1.07e-05	0.000524596	3.28018	NM_011905	24088	toll-like receptor 2 [Source:MGI Symbol;Acc:MGI:1346060]	24088	3	83743579	83749074	q	-1
NM_011662.2	Tyrobp	1449.91	0.696655	0.160939	4.32869	1.5e-05	0.000603217	3.21953	NM_011662	22177	TYRO protein tyrosine kinase binding protein [Source:MGI Symbol;Acc:MGI:1277211]	22177	7	30113185	30117010	q	1
NM_021274.2	Cxcl10	47.1726	1.70796	0.401396	4.25505	2.09e-05	0.000784448	3.10544	NM_021274	15945	C-X-C motif chemokine ligand 10 [Source:MGI Symbol;Acc:MGI:1352450]	15945	5	92494497	92496748	q	-1
NM_011333.3	Ccl2	33.9599	1.12388	0.27721	4.05425	5.03e-05	0.00176974	2.75209	NM_011333	20296	C-C motif chemokine ligand 2 [Source:MGI Symbol;Acc:MGI:98259]	20296	11	81926397	81928279	q	1
NM_031376.3	Pik3ap1	172.033	0.647172	0.161409	4.00952	6.08e-05	0.00201494	2.69574	NM_031376	83490	phosphoinositide-3-kinase adaptor protein 1 [Source:MGI Symbol;Acc:MGI:1933177]	83490	19	41260816	41373541	q	-1
NM_033374.3	Dock2	250.169	0.718704	0.178387	4.0289	5.6e-05	0.0028327	2.5478	NM_033374	94176	dedicator of cyto-kinesis 2 [Source:MGI Symbol;Acc:MGI:2149010]	94176	11	34176815	34674719	q	-1
NM_008528.4	Blnk	184.557	0.51127	0.127492	4.0102	6.07e-05	0.00287033	2.54207	NM_008528	17060	B cell linker [Source:MGI Symbol;Acc:MGI:96878]	17060	19	40917371	40982978	q	-1
NM_031254.2	Trem2	613.514	0.500349	0.12571	3.98018	6.89e-05	0.00295714	2.52913	NM_031254	83433	triggering receptor expressed on myeloid cells 2 [Source:MGI Symbol;Acc:MGI:1913150]	83433	17	48653429	48661175	q	1
NM_172488.2	Lacc1	201.595	0.446293	0.114072	3.91239	9.14e-05	0.00364103	2.43878	NM_172488	210808	laccase domain containing 1 [Source:MGI Symbol;Acc:MGI:2445077]	210808	14	77261640	77274344	q	-1
NM_007574.2	C1qc	2568.12	0.531207	0.13823	3.84292	0.000121581	0.0043827	2.35826	NM_007574	12262	complement component 1, q subcomponent, C chain [Source:MGI Symbol;Acc:MGI:88225]	12262	4	136617115	136620376	q	-1
NM_010501.2	Ifit3	922.958	1.15792	0.304564	3.8019	0.00014359	0.00449119	2.34764	NM_010501	15959	interferon-induced protein with tetratricopeptide repeats 3 [Source:MGI Symbol;Acc:MGI:1101055]	15959	19	34560931	34566131	q	1
NM_001252472.1	Cd84	300.821	0.685829	0.181513	3.7784	0.000157841	0.00467708	2.33003	NM_001252472	12523	CD84 antigen [Source:MGI Symbol;Acc:MGI:1336885]	12523	1	171667265	171718285	q	1
NM_030720.1	Gpr84	83.6869	0.708859	0.187551	3.77956	0.000157105	0.00495535	2.30493	NM_030720	80910	G protein-coupled receptor 84 [Source:MGI Symbol;Acc:MGI:1934129]	80910	15	103216662	103219039	q	-1
NM_008175.3	Grn	1676.86	0.466761	0.12347	3.78037	0.000156593	0.00495535	2.30493	NM_008175	14824	granulin [Source:MGI Symbol;Acc:MGI:95832]	14824	11	102321141	102327874	q	1
NM_001252651.1	Csf3r	133.268	0.583085	0.157191	3.70941	0.000207742	0.00629044	2.20132	NM_001252651	12986	colony stimulating factor 3 receptor [Source:MGI Symbol;Acc:MGI:1339755]	12986	4	125918343	125938233	q	1
NM_009841.3	Cd14	86.7831	0.602921	0.163401	3.68982	0.00022441	0.00653379	2.18484	NM_009841	12475	CD14 antigen [Source:MGI Symbol;Acc:MGI:88318]	12475	18	36858120	36859851	q	-1
NM_133859.2	Olfml3	895.575	0.522655	0.143022	3.65437	0.000257819	0.00722848	2.14095	NM_133859	99543	olfactomedin-like 3 [Source:MGI Symbol;Acc:MGI:1914877]	99543	3	103629538	103645317	q	-1
NM_001081278.2	Tbc1d4	335.734	-0.357683	0.0987618	-3.62167	0.000292707	0.00791355	2.10163	NM_001081278	210789	TBC1 domain family, member 4 [Source:MGI Symbol;Acc:MGI:2429660]	210789	14	101679796	101846627	q	-1
NM_008404.5	Itgb2	202.292	0.61218	0.169481	3.61208	0.000303751	0.00814342	2.08919	NM_008404	16414	integrin beta 2 [Source:MGI Symbol;Acc:MGI:96611]	16414	10	77366086	77401542	q	1
NM_011355.1	Spi1	199.59	0.627391	0.173147	3.62346	0.000290694	0.00814342	2.08919	NM_011355	20375	Spi-1 proto-oncogene [Source:MGI Symbol;Acc:MGI:98282]	20375	2	90912735	90946101	q	1
NM_008605.3	Mmp12	32.4869	1.07513	0.308519	3.4848	0.000492504	0.0120266	1.91986	NM_008605	17381	matrix metallopeptidase 12 [Source:MGI Symbol;Acc:MGI:97005]	17381	9	7344381	7369499	q	1
NM_011413.2	C4a	1443.1	0.884729	0.255805	3.45861	0.000542978	0.0128448	1.89127	NM_011413	625018	complement C4A (Rodgers blood group) [Source:MGI Symbol;Acc:MGI:98320]	625018	17	35028069	35042440	q	-1
NM_198095.2	Bst2	102.066	0.927085	0.271833	3.4105	0.000648446	0.0165943	1.78004	NM_198095	69550	bone marrow stromal cell antigen 2 [Source:MGI Symbol;Acc:MGI:1916800]	69550	8	71986899	71990100	q	-1
NM_145581.1	Siglecf	42.171	0.912448	0.273174	3.34017	0.000837279	0.0192067	1.71655	NM_145581	233186	sialic acid binding Ig-like lectin F [Source:MGI Symbol;Acc:MGI:2681107]	233186	7	43000765	43008955	q	1
NM_009810.2	Casp3	220.448	0.595111	0.177227	3.3579	0.000785366	0.0192244	1.71615	NM_009810	12367	caspase 3 [Source:MGI Symbol;Acc:MGI:107739]	12367	8	47070326	47092724	q	1
NM_001291058.1	Cd68	704.952	0.59427	0.179371	3.31308	0.000922759	0.0207805	1.68234	NM_001291058	12514	CD68 antigen [Source:MGI Symbol;Acc:MGI:88342]	12514	11	69555039	69556979	q	-1
NM_013545.2	Ptpn6	162.919	0.626784	0.188572	3.32384	0.000887857	0.0207805	1.68234	NM_013545	15170	protein tyrosine phosphatase, non-receptor type 6 [Source:MGI Symbol;Acc:MGI:96055]	15170	6	124697670	124715677	q	-1
NM_011701.4	Vim	1426.87	0.705072	0.213446	3.30328	0.000955597	0.0212761	1.67211	NM_011701	22352	vimentin [Source:MGI Symbol;Acc:MGI:98932]	22352	2	13578738	13587637	q	1
NM_013653.1	Ccl5	41.9514	1.28902	0.396491	3.25108	0.00114969	0.0248951	1.60389	NM_013653	20304	C-C motif chemokine ligand 5 [Source:MGI Symbol;Acc:MGI:98262]	20304	11	83416604	83421344	q	-1
NM_009777.2	C1qb	3907.09	0.461021	0.144111	3.19907	0.0013787	0.0274651	1.56122	NM_009777	12260	complement component 1, q subcomponent, beta polypeptide [Source:MGI Symbol;Acc:MGI:88224]	12260	4	136607440	136613498	q	-1
XM_897036.2	Col6a3	78.5284	-0.544859	0.170216	-3.20098	0.00136962	0.0274651	1.56122	XM_897036	NA	NA	NA	NA	NA	NA	NA	NA
NM_011173.2	Pros1	324.806	0.397825	0.125214	3.17717	0.00148718	0.0288665	1.53961	NM_011173	19128	protein S (alpha) [Source:MGI Symbol;Acc:MGI:1095733]	19128	16	62674670	62749709	q	1
NM_011577.1	Tgfb1	394.768	0.44467	0.140241	3.17077	0.00152036	0.0317023	1.49891	NM_011577	21803	transforming growth factor, beta 1 [Source:MGI Symbol;Acc:MGI:98725]	21803	7	25386427	25404502	q	1
NM_010186.5	Fcgr1	148.132	0.67314	0.218875	3.07545	0.00210184	0.0408046	1.38929	NM_010186	14129	Fc receptor, IgG, high affinity I [Source:MGI Symbol;Acc:MGI:95498]	14129	3	96190225	96201285	q	-1
NM_011609.2	Tnfrsf1a	397.712	0.352681	0.115225	3.06079	0.00220752	0.0414278	1.38271	NM_011609	21937	tumor necrosis factor receptor superfamily, member 1a [Source:MGI Symbol;Acc:MGI:1314884]	21937	6	125326325	125339447	q	1
NM_010185.4	Fcer1g	380.766	0.501308	0.164524	3.04703	0.00231117	0.043739	1.35913	NM_010185	14127	Fc receptor, IgE, high affinity I, gamma polypeptide [Source:MGI Symbol;Acc:MGI:95496]	14127	1	171057141	171061934	q	-1
NM_021281.2	Ctss	4306.74	0.511503	0.169512	3.01751	0.00254863	0.0462864	1.33455	NM_021281	13040	cathepsin S [Source:MGI Symbol;Acc:MGI:107341]	13040	3	95434097	95463714	q	1
NM_013489.2	Cd84	215.429	0.501603	0.167506	2.99454	0.00274855	0.0507371	1.29467	NM_013489	12523	CD84 antigen [Source:MGI Symbol;Acc:MGI:1336885]	12523	1	171667265	171718285	q	1
NM_010358.5	Gstm1	211.921	-0.344332	0.115267	-2.98725	0.002815	0.0507371	1.29467	NM_010358	14862	glutathione S-transferase, mu 1 [Source:MGI Symbol;Acc:MGI:95860]	14862	3	107919571	107925289	q	-1
NM_008332.2	Ifit2	285.772	0.43251	0.146612	2.95002	0.00317755	0.055905	1.25255	NM_008332	15958	interferon-induced protein with tetratricopeptide repeats 2 [Source:MGI Symbol;Acc:MGI:99449]	15958	19	34528094	34553819	q	1
NM_011691.4	Vav1	192.449	0.44049	0.149496	2.94651	0.00321386	0.0565789	1.24735	NM_011691	22324	vav 1 oncogene [Source:MGI Symbol;Acc:MGI:98923]	22324	17	57586100	57635031	q	1
NM_010436.2	H2afx	1941.72	-0.234062	0.0801864	-2.91898	0.00351183	0.0590768	1.22858	NM_010436	15270	H2A.X variant histone [Source:MGI Symbol;Acc:MGI:102688]	15270	9	44245991	44247374	q	1
NM_019549.2	Plek	171.977	0.43994	0.152249	2.88961	0.00385716	0.0658055	1.18174	NM_019549	56193	pleckstrin [Source:MGI Symbol;Acc:MGI:1860485]	56193	11	16921206	17002381	q	-1
NM_011163.4	Eif2ak2	341.504	0.43648	0.152017	2.87126	0.00408837	0.0661391	1.17954	NM_011163	19106	eukaryotic translation initiation factor 2-alpha kinase 2 [Source:MGI Symbol;Acc:MGI:1353449]	19106	17	79159993	79190002	q	-1
NM_009008.3	Rac2	122.385	0.613134	0.213675	2.86946	0.00411167	0.0661391	1.17954	NM_009008	19354	Rac family small GTPase 2 [Source:MGI Symbol;Acc:MGI:97846]	19354	15	78443367	78456983	q	-1
NM_010747.2	Lyn	210.674	0.377151	0.133088	2.83385	0.00459906	0.0681388	1.16661	NM_010747	17096	LYN proto-oncogene, Src family tyrosine kinase [Source:MGI Symbol;Acc:MGI:96892]	17096	4	3678115	3813122	q	1
NM_017372.3	Lyz2	271.512	0.61427	0.215769	2.84689	0.00441489	0.0681388	1.16661	NM_017372	17105	lysozyme 2 [Source:MGI Symbol;Acc:MGI:96897]	17105	10	117113236	117118226	q	-1
NM_030253.2	Parp9	154.633	0.457885	0.161418	2.83665	0.00455898	0.0681388	1.16661	NM_030253	80285	poly (ADP-ribose) polymerase family, member 9 [Source:MGI Symbol;Acc:MGI:1933117]	80285	16	35758840	35792975	q	1
NM_021281.2	Ctss	2072.05	0.437058	0.15625	2.79716	0.00515532	0.0830336	1.08075	NM_021281	13040	cathepsin S [Source:MGI Symbol;Acc:MGI:107341]	13040	3	95434097	95463714	q	1
NM_007572.2	C1qa	2411.45	0.421639	0.151207	2.78849	0.00529536	0.0835122	1.07825	NM_007572	12259	complement component 1, q subcomponent, alpha polypeptide [Source:MGI Symbol;Acc:MGI:88223]	12259	4	136623228	136626114	q	-1
NM_010220.3	Fkbp5	414.575	-0.408195	0.146932	-2.77812	0.0054675	0.0844672	1.07331	NM_010220	14229	FK506 binding protein 5 [Source:MGI Symbol;Acc:MGI:104670]	14229	17	28618068	28736501	q	-1
NM_009841.3	Cd14	75.6729	0.570071	0.208196	2.73815	0.00617865	0.0869645	1.06066	NM_009841	12475	CD14 antigen [Source:MGI Symbol;Acc:MGI:88318]	12475	18	36858120	36859851	q	-1
NM_018734.3	Gbp3	143.347	0.556954	0.202923	2.74466	0.00605734	0.0869645	1.06066	NM_018734	55932	guanylate binding protein 3 [Source:MGI Symbol;Acc:MGI:1926263]	55932	3	142265787	142278970	q	1
NM_001001892.2	H2-K1	996.14	0.517437	0.190922	2.71021	0.0067241	0.0923334	1.03464	NM_001001892	14972	histocompatibility 2, K1, K region [Source:MGI Symbol;Acc:MGI:95904]	14972	17	34214991	34219321	q	-1
NM_007984.2	Fscn1	5895.78	-0.18491	0.0687333	-2.69025	0.00713988	0.0965722	1.01515	NM_007984	14086	fascin actin-bundling protein 1 [Source:MGI Symbol;Acc:MGI:1352745]	14086	5	142946098	142958940	q	1
NM_030691.1	Igsf6	50.4449	0.699289	0.259953	2.69005	0.00714404	0.0965722	1.01515	NM_030691	80719	immunoglobulin superfamily, member 6 [Source:MGI Symbol;Acc:MGI:1891393]	80719	7	120663290	120673795	q	-1
NM_053190.2	S1pr5	590.068	-0.338864	0.125721	-2.69537	0.00703102	0.0965722	1.01515	NM_053190	94226	sphingosine-1-phosphate receptor 5 [Source:MGI Symbol;Acc:MGI:2150641]	94226	9	21154208	21159739	q	-1
NM_009917.5	Ccr5	304.01	0.472725	0.177321	2.66592	0.00767775	0.0982403	1.00771	NM_009917	12774	C-C motif chemokine receptor 5 [Source:MGI Symbol;Acc:MGI:107182]	12774	9	123921580	123947736	q	1
NM_001252651.1	Csf3r	117.148	0.501026	0.187836	2.66735	0.00764518	0.0982403	1.00771	NM_001252651	12986	colony stimulating factor 3 receptor [Source:MGI Symbol;Acc:MGI:1339755]	12986	4	125918343	125938233	q	1
NM_008501.2	Lif	59.6115	-0.603127	0.225576	-2.67372	0.00750143	0.0982403	1.00771	NM_008501	16878	leukemia inhibitory factor [Source:MGI Symbol;Acc:MGI:96787]	16878	11	4207557	4222514	q	1
NM_010724.2	Psmb8	333.504	0.585482	0.220325	2.65735	0.00787574	0.0985342	1.00641	NM_010724	16913	proteasome (prosome, macropain) subunit, beta type 8 (large multifunctional peptidase 7) [Source:MGI Symbol;Acc:MGI:1346527]	16913	17	34416695	34420428	q	1
NM_144559.1	Fcgr4	32.7289	0.824683	0.312051	2.64278	0.00822285	0.100468	0.997973	NM_144559	246256	Fc receptor, IgG, low affinity IV [Source:MGI Symbol;Acc:MGI:2179523]	246256	1	170846489	170857330	q	1
NM_016850.2	Irf7	93.0896	1.04074	0.394809	2.63607	0.00838719	0.100468	0.997973	NM_016850	54123	interferon regulatory factor 7 [Source:MGI Symbol;Acc:MGI:1859212]	54123	7	140842619	140846394	q	-1
NM_010188.5	Fcgr3	219.259	0.431036	0.163623	2.63432	0.00843065	0.111965	0.950918	NM_010188	14131	Fc receptor, IgG, low affinity III [Source:MGI Symbol;Acc:MGI:95500]	14131	1	170878743	170892504	q	-1
NM_001253715.1	Msra	1581.12	-0.300687	0.116049	-2.59103	0.00956885	0.112235	0.949873	NM_001253715	110265	methionine sulfoxide reductase A [Source:MGI Symbol;Acc:MGI:106916]	110265	14	64360074	64693352	q	-1
NM_009598.1	Ace	525.46	-0.65361	0.253188	-2.58152	0.00983673	0.112413	0.949185	NM_009598	11421	angiotensin I converting enzyme [Source:MGI Symbol;Acc:MGI:87874]	11421	11	105858771	105880790	q	1
NM_019467.2	Aif1	826.57	0.432619	0.168806	2.56282	0.0103827	0.112413	0.949185	NM_019467	11629	allograft inflammatory factor 1 [Source:MGI Symbol;Acc:MGI:1343098]	11629	17	35389967	35395044	q	-1
NM_010877.4	Ncf2	160.745	0.36085	0.140648	2.56562	0.0102991	0.112413	0.949185	NM_010877	17970	neutrophil cytosolic factor 2 [Source:MGI Symbol;Acc:MGI:97284]	17970	1	152675945	152712742	q	1
NM_011851.3	Nt5e	267.361	-0.539711	0.210565	-2.56315	0.0103727	0.112413	0.949185	NM_011851	23959	5' nucleotidase, ecto [Source:MGI Symbol;Acc:MGI:99782]	23959	9	88209250	88254145	q	1
NM_008873.3	Plau	84.8281	0.493258	0.193498	2.54916	0.0107982	0.114559	0.94097	NM_008873	18792	plasminogen activator, urokinase [Source:MGI Symbol;Acc:MGI:97611]	18792	14	20886728	20893453	q	1
NM_023258.4	Pycard	137.675	0.560217	0.221399	2.53035	0.0113949	0.114559	0.94097	NM_023258	66824	PYD and CARD domain containing [Source:MGI Symbol;Acc:MGI:1931465]	66824	7	127588880	127593039	q	-1
NM_001161730.1	Tap1	87.4791	0.615297	0.243083	2.53122	0.0113667	0.114559	0.94097	NM_001161730	21354	transporter 1, ATP-binding cassette, sub-family B (MDR/TAP) [Source:MGI Symbol;Acc:MGI:98483]	21354	17	34406527	34416199	q	1
XM_006532802.2	Tcf7	309.882	-0.50938	0.200526	-2.54022	0.0110782	0.114559	0.94097	XM_006532802	NA	NA	NA	NA	NA	NA	NA	NA
NM_025864.3	Tmem206	612.817	0.248352	0.094944	2.61578	0.00890245	0.116192	0.934822	NM_025864	66950	proton activated chloride channel 1 [Source:MGI Symbol;Acc:MGI:1914200]	66950	1	191058109	191083111	q	1
NM_010380.3	H2-D1	500.491	0.454753	0.181888	2.50017	0.0124132	0.116477	0.933758	NM_010380	14964	histocompatibility 2, D region locus 1 [Source:MGI Symbol;Acc:MGI:95896]	14964	17	35481706	35486475	q	1
NM_015783.3	Isg15	178.897	0.774598	0.307932	2.51549	0.0118868	0.116477	0.933758	NM_015783	100038882	ISG15 ubiquitin-like modifier [Source:MGI Symbol;Acc:MGI:1855694]	100038882	4	156283912	156285253	q	-1
NM_001247984.1	Lcp1	359.119	0.431381	0.172175	2.50548	0.0122284	0.116477	0.933758	NM_001247984	18826	lymphocyte cytosolic protein 1 [Source:MGI Symbol;Acc:MGI:104808]	18826	14	75368541	75468282	q	1
NM_019408.2	Nfkb2	145.546	0.391712	0.15639	2.50472	0.0122548	0.116477	0.933758	NM_019408	18034	nuclear factor of kappa light polypeptide gene enhancer in B cells 2, p49/p100 [Source:MGI Symbol;Acc:MGI:1099800]	18034	19	46292759	46300824	q	1
NM_008655.1	Gadd45b	341.469	-0.363152	0.145795	-2.49084	0.0127442	0.117074	0.931538	NM_008655	17873	growth arrest and DNA-damage-inducible 45 beta [Source:MGI Symbol;Acc:MGI:107776]	17873	10	80765907	80768038	q	1
NM_030688.1	Il1rapl2	355.721	-0.543359	0.218868	-2.48259	0.013043	0.117074	0.931538	NM_030688	60367	interleukin 1 receptor accessory protein-like 2 [Source:MGI Symbol;Acc:MGI:1913106]	60367	X	136471357	137747695	q	1
NM_030682.1	Tlr1	57.6475	0.61596	0.248269	2.48102	0.0131007	0.117074	0.931538	NM_030682	21897	toll-like receptor 1 [Source:MGI Symbol;Acc:MGI:1341295]	21897	5	65082022	65090906	q	-1
NM_009984.4	Ctsl	2724.09	0.219119	0.0886275	2.47236	0.0134224	0.118075	0.927843	NM_009984	13039	cathepsin L [Source:MGI Symbol;Acc:MGI:88564]	13039	13	64507151	64518704	q	-1
NM_001037859.2	Csf1r	925.888	0.356267	0.145738	2.44457	0.0145024	0.125613	0.900966	NM_001037859	12978	colony stimulating factor 1 receptor [Source:MGI Symbol;Acc:MGI:1339758]	12978	18	61233670	61265221	q	1
NM_031178.2	Tlr9	70.3876	0.483929	0.200078	2.4187	0.0155759	0.132867	0.876582	NM_031178	81897	toll-like receptor 9 [Source:MGI Symbol;Acc:MGI:1932389]	81897	9	106099797	106104082	q	1
NM_013556.2	Hprt	2318.02	-0.154323	0.0605898	-2.54702	0.0108648	0.137727	0.860982	NM_013556	15452	hypoxanthine phosphoribosyltransferase 1 [Source:MGI Symbol;Acc:MGI:96217]	15452	X	52077014	52110536	q	1
NM_011577.1	Tgfb1	263.15	0.390049	0.153239	2.54537	0.0109162	0.137727	0.860982	NM_011577	21803	transforming growth factor, beta 1 [Source:MGI Symbol;Acc:MGI:98725]	21803	7	25386427	25404502	q	1
NM_009793.3	Camk4	5764.23	-0.561839	0.222446	-2.52573	0.0115457	0.138732	0.857825	NM_009793	12326	calcium/calmodulin-dependent protein kinase IV [Source:MGI Symbol;Acc:MGI:88258]	12326	18	33067984	33324281	q	1
NM_007669.4	Cdkn1a	449.85	-0.387866	0.153523	-2.52643	0.0115228	0.138732	0.857825	NM_007669	12575	cyclin dependent kinase inhibitor 1A [Source:MGI Symbol;Acc:MGI:104556]	12575	17	29309950	29319701	q	1
NM_010186.5	Fcgr1	241.982	0.540846	0.213983	2.52751	0.0114874	0.138732	0.857825	NM_010186	14129	Fc receptor, IgG, high affinity I [Source:MGI Symbol;Acc:MGI:95498]	14129	3	96190225	96201285	q	-1
NM_008394.3	Irf9	543.57	0.340919	0.142471	2.3929	0.0167156	0.140461	0.852444	NM_008394	16391	interferon regulatory factor 9 [Source:MGI Symbol;Acc:MGI:107587]	16391	14	55841028	55847487	q	1
NM_011609.2	Tnfrsf1a	340.809	0.278623	0.11076	2.51555	0.0118847	0.140574	0.852095	NM_011609	21937	tumor necrosis factor receptor superfamily, member 1a [Source:MGI Symbol;Acc:MGI:1314884]	21937	6	125326325	125339447	q	1
NM_001190333.1	Ccr6	61.7742	-0.787961	0.331107	-2.37978	0.017323	0.141346	0.849717	NM_001190333	12458	C-C motif chemokine receptor 6 [Source:MGI Symbol;Acc:MGI:1333797]	12458	17	8454875	8475973	q	1
NM_025378.2	Ifitm3	1182.82	0.48855	0.205236	2.38042	0.0172928	0.141346	0.849717	NM_025378	66141	interferon induced transmembrane protein 3 [Source:MGI Symbol;Acc:MGI:1913391]	66141	7	140589499	140590683	q	-1
NM_001081365.1	Cystm1	1847.42	-0.363218	0.154181	-2.35579	0.0184833	0.148659	0.82781	NM_001081365	66060	cysteine-rich transmembrane module containing 1 [Source:MGI Symbol;Acc:MGI:1913310]	66060	18	36475573	36536150	q	1
NM_133871.2	Ifi44	91.6222	0.854435	0.364544	2.34385	0.019086	0.151344	0.820035	NM_133871	99899	interferon-induced protein 44 [Source:MGI Symbol;Acc:MGI:2443016]	99899	3	151436559	151455597	q	-1
NM_026433.2	Tmem100	547.079	0.24874	0.100248	2.48125	0.0130924	0.152476	0.816799	NM_026433	67888	transmembrane protein 100 [Source:MGI Symbol;Acc:MGI:1915138]	67888	11	89921174	89927334	q	1
XM_011246258.1	C3	71.5567	0.848158	0.364855	2.32464	0.0200911	0.155396	0.80856	XM_011246258	NA	NA	NA	NA	NA	NA	NA	NA
NM_172285.1	Plcg2	192.163	0.358699	0.154375	2.32356	0.020149	0.155396	0.80856	NM_172285	234779	phospholipase C, gamma 2 [Source:MGI Symbol;Acc:MGI:97616]	234779	8	118225030	118361881	q	1
NM_009911.3	Cxcr4	112.119	0.606488	0.266181	2.27848	0.0226981	0.172689	0.762735	NM_009911	12767	C-X-C motif chemokine receptor 4 [Source:MGI Symbol;Acc:MGI:109563]	12767	1	128515936	128520030	q	-1
NM_009465.3	Axl	769.257	0.321747	0.133176	2.41596	0.0156938	0.177317	0.75125	NM_009465	26362	AXL receptor tyrosine kinase [Source:MGI Symbol;Acc:MGI:1347244]	26362	7	25456698	25488130	q	-1
NM_009283.3	Stat1	573.368	0.343971	0.15212	2.26118	0.0237482	0.17827	0.748923	NM_009283	20846	signal transducer and activator of transcription 1 [Source:MGI Symbol;Acc:MGI:103063]	20846	1	52158599	52201024	q	1
NM_001163522.1	Emcn	400.084	-0.249219	0.103964	-2.39717	0.0165221	0.179499	0.745938	NM_001163522	59308	endomucin [Source:MGI Symbol;Acc:MGI:1891716]	59308	3	137046828	137137946	q	1
NM_023065.3	Ifi30	190.952	0.32345	0.134812	2.39926	0.0164283	0.179499	0.745938	NM_023065	65972	interferon gamma inducible protein 30 [Source:MGI Symbol;Acc:MGI:2137648]	65972	8	71215419	71219307	q	-1
NM_001109752.1	Dlg4	9736.74	-0.287123	0.121702	-2.35923	0.0183129	0.184912	0.733034	NM_001109752	13385	discs large MAGUK scaffold protein 4 [Source:MGI Symbol;Acc:MGI:1277959]	13385	11	69907768	69938348	q	1
NM_023608.3	Gdpd2	357.157	0.394272	0.168169	2.34449	0.0190531	0.184912	0.733034	NM_023608	71584	glycerophosphodiester phosphodiesterase domain containing 2 [Source:MGI Symbol;Acc:MGI:1918834]	71584	X	99773479	99782501	q	1
NM_011823.4	Gpr34	759.322	0.316886	0.134053	2.3639	0.0180839	0.184912	0.733034	NM_011823	23890	G protein-coupled receptor 34 [Source:MGI Symbol;Acc:MGI:1346334]	23890	X	13498328	13507097	q	1
NM_030701.1	Hcar2	26.7957	0.672911	0.285393	2.35784	0.0183816	0.184912	0.733034	NM_030701	80885	hydroxycarboxylic acid receptor 2 [Source:MGI Symbol;Acc:MGI:1933383]	80885	5	124001633	124003562	q	-1
NM_010764.2	Man2b1	1305.31	0.23241	0.0991206	2.34472	0.0190414	0.184912	0.733034	NM_010764	17159	mannosidase 2, alpha B1 [Source:MGI Symbol;Acc:MGI:107286]	17159	8	85809899	85824911	q	1
NM_133655.2	Cd81	12938.6	0.146597	0.0655751	2.23557	0.0253803	0.188014	0.725809	NM_133655	12520	CD81 antigen [Source:MGI Symbol;Acc:MGI:1096398]	12520	7	142606476	142621671	q	1
NM_001199960.1	Ccl27a/b	209.796	-0.316337	0.141845	-2.23016	0.0257367	0.188179	0.72543	NM_001199960	NA	NA	NA	NA	NA	NA	NA	NA
NM_010591.2	Jun	1312.19	0.4102	0.184352	2.22509	0.0260752	0.18821	0.725358	NM_010591	16476	jun proto-oncogene [Source:MGI Symbol;Acc:MGI:96646]	16476	4	94937271	94940459	q	-1
NM_028173.5	Tram1	930.829	0.178451	0.080524	2.21612	0.0266833	0.190161	0.72088	NM_028173	72265	translocating chain-associating membrane protein 1 [Source:MGI Symbol;Acc:MGI:1919515]	72265	1	13634922	13660134	q	-1
NM_020044.3	Lat2	78.1407	0.543616	0.248333	2.18906	0.0285923	0.201218	0.696333	NM_020044	56743	linker for activation of T cells family, member 2 [Source:MGI Symbol;Acc:MGI:1926479]	56743	5	134628876	134643879	q	-1
NM_172786.2	Il20ra	86.4416	-0.731428	0.335217	-2.18196	0.0291128	0.201564	0.695587	NM_172786	237313	interleukin 20 receptor, alpha [Source:MGI Symbol;Acc:MGI:3605069]	237313	10	19588318	19635801	q	1
NM_010696.4	Lcp2	158.334	0.318955	0.1464	2.17865	0.0293574	0.201564	0.695587	NM_010696	16822	lymphocyte cytosolic protein 2 [Source:MGI Symbol;Acc:MGI:1321402]	16822	11	33996920	34042295	q	1
NM_009807.2	Casp1	44.0627	0.51011	0.235346	2.16749	0.0301975	0.204833	0.688599	NM_009807	12362	caspase 1 [Source:MGI Symbol;Acc:MGI:96544]	12362	9	5298508	5307290	q	1
NM_001082960.1	Itgam	745.368	0.33226	0.153752	2.16102	0.030694	0.205723	0.686717	NM_001082960	16409	integrin alpha M [Source:MGI Symbol;Acc:MGI:96607]	16409	7	127661812	127717663	q	1
NM_018790.2	Arc	1314.2	-0.621503	0.27135	-2.29041	0.0219977	0.206269	0.685566	NM_018790	11838	activity regulated cytoskeletal-associated protein [Source:MGI Symbol;Acc:MGI:88067]	11838	15	74540932	74544419	q	-1
NM_016681.3	Chek2	52.4738	0.462377	0.201352	2.29637	0.021655	0.206269	0.685566	NM_016681	50883	checkpoint kinase 2 [Source:MGI Symbol;Acc:MGI:1355321]	50883	5	110987845	111022011	q	1
NM_010833.2	Msn	338.007	0.353123	0.15426	2.28914	0.022071	0.206269	0.685566	NM_010833	17698	moesin [Source:MGI Symbol;Acc:MGI:97167]	17698	X	95139648	95212158	q	1
NM_008368.4	Il2rb	41.2381	-0.716914	0.333178	-2.15175	0.0314173	0.208093	0.681742	NM_008368	16185	interleukin 2 receptor, beta chain [Source:MGI Symbol;Acc:MGI:96550]	16185	15	78363456	78379471	q	-1
NM_001111058.1	Cd33	115.441	0.34918	0.153879	2.26919	0.0232569	0.209328	0.679173	NM_001111058	12489	CD33 molecule [Source:MGI Symbol;Acc:MGI:99440]	12489	7	43173640	43193852	q	-1
NM_028071.3	Cotl1	1902.24	0.201221	0.0885532	2.27232	0.0230671	0.209328	0.679173	NM_028071	72042	coactosin like F-actin binding protein 1 [Source:MGI Symbol;Acc:MGI:1919292]	72042	8	120535961	120567283	q	-1
NM_026988.2	Ptms	19267.8	-0.190737	0.0837373	-2.2778	0.0227384	0.209328	0.679173	NM_026988	69202	parathymosin [Source:MGI Symbol;Acc:MGI:1916452]	69202	6	124890644	124897066	q	-1
NM_021384.4	Rsad2	53.7857	0.551387	0.259649	2.12359	0.0337047	0.220648	0.6563	NM_021384	58185	radical S-adenosyl methionine domain containing 2 [Source:MGI Symbol;Acc:MGI:1929628]	58185	12	26492745	26506451	q	-1
NM_010814.2	Mog	4286.85	-0.265271	0.118954	-2.23002	0.025746	0.226625	0.644692	NM_010814	17441	myelin oligodendrocyte glycoprotein [Source:MGI Symbol;Acc:MGI:97435]	17441	17	37321635	37334290	q	-1
NM_153459.4	Dusp7	2431.02	-0.224651	0.101381	-2.21591	0.0266973	0.229882	0.638495	NM_153459	235584	dual specificity phosphatase 7 [Source:MGI Symbol;Acc:MGI:2387100]	235584	9	106245831	106252923	q	1
NM_008320.3	Irf8	132.937	0.389074	0.17631	2.20676	0.0273308	0.229882	0.638495	NM_008320	15900	interferon regulatory factor 8 [Source:MGI Symbol;Acc:MGI:96395]	15900	8	121463097	121483433	q	1
NM_024459.2	Ppp3r1	10771.7	-0.352571	0.159444	-2.21125	0.0270183	0.229882	0.638495	NM_024459	19058	protein phosphatase 3, regulatory subunit B, alpha isoform (calcineurin B, type I) [Source:MGI Symbol;Acc:MGI:107172]	19058	11	17109263	17150375	q	1
NM_001161714.1	Tgm1	27.1945	0.737535	0.333862	2.2091	0.0271678	0.229882	0.638495	NM_001161714	21816	transglutaminase 1, K polypeptide [Source:MGI Symbol;Acc:MGI:98730]	21816	14	55937466	55951383	q	-1
NM_181545.4	Slfn8	51.5948	0.642849	0.293691	2.18886	0.0286069	0.237972	0.623474	NM_181545	276950	schlafen 8 [Source:MGI Symbol;Acc:MGI:2672859]	276950	11	82892984	82911636	q	-1
NM_019388.3	Cd86	128.3	0.431121	0.207547	2.07722	0.0377811	0.241713	0.616699	NM_019388	12524	CD86 antigen [Source:MGI Symbol;Acc:MGI:101773]	12524	16	36424231	36486443	q	-1
XM_006524705.3	Plin4	138.655	-0.845283	0.406335	-2.08026	0.0375017	0.241713	0.616699	XM_006524705	NA	NA	NA	NA	NA	NA	NA	NA
NM_011448.4	Sox9	1137.44	0.17232	0.0791062	2.17834	0.0293807	0.241752	0.61663	NM_011448	20682	SRY (sex determining region Y)-box 9 [Source:MGI Symbol;Acc:MGI:98371]	20682	11	112673050	112678586	q	1
NM_153177.3	Ago4	129.205	-0.388	0.180188	-2.1533	0.0312948	0.244228	0.612204	NM_153177	76850	argonaute RISC catalytic subunit 4 [Source:MGI Symbol;Acc:MGI:1924100]	76850	4	126383334	126427265	q	-1
NM_001085515.2	AI464131	652.425	0.242849	0.111987	2.16854	0.0301176	0.244228	0.612204	NM_001085515	329828	myogenesis regulating glycosidase (putative) [Source:MGI Symbol;Acc:MGI:2140300]	329828	4	41495604	41503076	q	-1
NM_001145884.1	Itgb5	1968.71	0.279359	0.129587	2.15576	0.0311021	0.244228	0.612204	NM_001145884	16419	integrin beta 5 [Source:MGI Symbol;Acc:MGI:96614]	16419	16	33650035	33769708	q	1
NM_001024931.2	Rbfox3	5784.3	-0.321792	0.148584	-2.16573	0.0303321	0.244228	0.612204	NM_001024931	52897	RNA binding protein, fox-1 homolog (C. elegans) 3 [Source:MGI Symbol;Acc:MGI:106368]	52897	11	118380588	118802423	q	-1
NM_013488.2	Cd4	1139.4	-0.718056	0.347654	-2.06544	0.0388818	0.24596	0.609135	NM_013488	12504	CD4 antigen [Source:MGI Symbol;Acc:MGI:88335]	12504	6	124841655	124865184	q	-1
NM_001044751.1	Hsd11b1	1134.14	0.58039	0.286002	2.02932	0.0424259	0.265397	0.576103	NM_001044751	15483	hydroxysteroid 11-beta dehydrogenase 1 [Source:MGI Symbol;Acc:MGI:103562]	15483	1	192903942	192946383	q	-1
NM_020272.2	Pik3cg	100.885	0.345223	0.171094	2.01774	0.0436179	0.266922	0.573615	NM_020272	30955	phosphatidylinositol-4,5-bisphosphate 3-kinase catalytic subunit gamma [Source:MGI Symbol;Acc:MGI:1353576]	30955	12	32223472	32258658	q	-1
NM_011659.2	Tnfrsf4	38.7556	-0.594774	0.2945	-2.01961	0.0434241	0.266922	0.573615	NM_011659	22163	tumor necrosis factor receptor superfamily, member 4 [Source:MGI Symbol;Acc:MGI:104512]	22163	4	156098300	156101069	q	1
NM_021878.2	Jarid2	964.583	-0.152602	0.0724016	-2.10772	0.0350552	0.268048	0.571787	NM_021878	16468	jumonji and AT-rich interaction domain containing 2 [Source:MGI Symbol;Acc:MGI:104813]	16468	13	44882950	45075119	q	1
NM_001113474.1	Lair1	382.038	0.24031	0.114583	2.09725	0.0359715	0.269945	0.568725	NM_001113474	52855	leukocyte-associated Ig-like receptor 1 [Source:MGI Symbol;Acc:MGI:105492]	52855	7	4006401	4066178	q	-1
NM_172285.1	Plcg2	206.135	0.297748	0.142109	2.0952	0.0361532	0.269945	0.568725	NM_172285	234779	phospholipase C, gamma 2 [Source:MGI Symbol;Acc:MGI:97616]	234779	8	118225030	118361881	q	1
NM_008331.2	Ifit1	164.208	0.607222	0.303748	1.9991	0.0455979	0.273102	0.563675	NM_008331	15957	interferon-induced protein with tetratricopeptide repeats 1 [Source:MGI Symbol;Acc:MGI:99450]	15957	19	34618271	34627409	q	1
NM_145211.2	Oas1a	79.5223	0.74284	0.37141	2.00005	0.0454944	0.273102	0.563675	NM_145211	246730	2'-5' oligoadenylate synthetase 1A [Source:MGI Symbol;Acc:MGI:2180860]	246730	5	121034319	121045584	q	-1
NM_011034.4	Prdx1	590.549	-0.199627	0.0957995	-2.0838	0.0371787	0.273245	0.563447	NM_011034	18477	peroxiredoxin 1 [Source:MGI Symbol;Acc:MGI:99523]	18477	4	116542741	116558019	q	1
NM_007552.4	Bmi1	1081.04	-0.228024	0.110169	-2.06977	0.0384741	0.277155	0.557277	NM_007552	12151	Bmi1 polycomb ring finger oncogene [Source:MGI Symbol;Acc:MGI:88174]	12151	2	18681829	18691440	q	1
NM_010758.2	Mag	3980.57	-0.241249	0.116759	-2.06621	0.0388091	0.277155	0.557277	NM_010758	17136	myelin-associated glycoprotein [Source:MGI Symbol;Acc:MGI:96912]	17136	7	30598601	30614298	q	-1
NM_011104.2	Prkce	7074.95	-0.197803	0.096099	-2.05832	0.0395591	0.279871	0.553042	NM_011104	18754	protein kinase C, epsilon [Source:MGI Symbol;Acc:MGI:97599]	18754	17	86475213	86965347	q	1
NM_001305844.1	Apoe	24788.7	0.158023	0.0772777	2.04488	0.040867	0.283997	0.546686	NM_001305844	11816	apolipoprotein E [Source:MGI Symbol;Acc:MGI:88057]	11816	7	19430034	19433113	q	-1
NM_010228.3	Flt1	778.34	-0.214139	0.10591	-2.0219	0.0431871	0.283997	0.546686	NM_010228	14254	FMS-like tyrosine kinase 1 [Source:MGI Symbol;Acc:MGI:95558]	14254	5	147498414	147662821	q	-1
NM_010304.3	Gna15	111.802	0.357288	0.176552	2.0237	0.0430012	0.283997	0.546686	NM_010304	14676	guanine nucleotide binding protein, alpha 15 [Source:MGI Symbol;Acc:MGI:95770]	14676	10	81338140	81360059	q	-1
NM_008397.3	Itga6	942.259	0.264724	0.13137	2.0151	0.0438939	0.283997	0.546686	NM_008397	16403	integrin alpha 6 [Source:MGI Symbol;Acc:MGI:96605]	16403	2	71575960	71688760	q	1
NM_008534.2	Ly9	53.8827	0.548442	0.271087	2.02312	0.0430607	0.283997	0.546686	NM_008534	17085	lymphocyte antigen 9 [Source:MGI Symbol;Acc:MGI:96885]	17085	1	171416192	171434978	q	-1
NM_008594.2	Mfge8	878.683	-0.256247	0.126997	-2.01774	0.0436179	0.283997	0.546686	NM_008594	17304	milk fat globule EGF and factor V/VIII domain containing [Source:MGI Symbol;Acc:MGI:102768]	17304	7	78783516	78798808	q	-1
NM_031842.1	Smarcd1	1381.94	-0.290662	0.143781	-2.02156	0.0432213	0.283997	0.546686	NM_031842	83797	SWI/SNF related BAF chromatin remodeling complex subunit D1 [Source:MGI Symbol;Acc:MGI:1933623]	83797	15	99600010	99611872	q	1
NM_013697.4	Ttr	163.81	-1.49184	0.735487	-2.02837	0.0425223	0.283997	0.546686	NM_013697	22139	transthyretin [Source:MGI Symbol;Acc:MGI:98865]	22139	18	20798337	20807378	q	1
NM_172689.3	Ddx58	232.676	0.361975	0.183221	1.97562	0.0481978	0.284449	0.545996	NM_172689	230073	RNA sensor RIG-I [Source:MGI Symbol;Acc:MGI:2442858]	230073	4	40203773	40239828	q	-1
NM_007707.2	Socs3	44.4144	0.491863	0.249305	1.97294	0.0485028	0.284449	0.545996	NM_007707	12702	suppressor of cytokine signaling 3 [Source:MGI Symbol;Acc:MGI:1201791]	12702	11	117856905	117860873	q	-1
NM_013482.2	Btk	68.5531	0.364134	0.181542	2.00578	0.0448792	0.285492	0.544406	NM_013482	12229	Bruton agammaglobulinemia tyrosine kinase [Source:MGI Symbol;Acc:MGI:88216]	12229	X	133443085	133484319	q	-1
NM_007440.4	Alox12	29.6906	-0.566411	0.290015	-1.95304	0.0508146	0.290556	0.536771	NM_007440	11684	arachidonate 12-lipoxygenase [Source:MGI Symbol;Acc:MGI:87998]	11684	11	70132283	70146179	q	-1
NM_011539.3	Tbxas1	190.511	0.33586	0.172174	1.9507	0.0510924	0.290556	0.536771	NM_011539	21391	thromboxane A synthase 1, platelet [Source:MGI Symbol;Acc:MGI:98497]	21391	6	38852338	39061519	q	1
NM_009371.2	Tgfbr2	778.867	0.201059	0.102913	1.95368	0.0507393	0.290556	0.536771	NM_009371	21813	transforming growth factor, beta receptor II [Source:MGI Symbol;Acc:MGI:98729]	21813	9	115913361	116004428	q	-1
NM_009630.3	Adora2a	2411.06	-0.679455	0.352772	-1.92605	0.0540988	0.295249	0.529812	NM_009630	11540	adenosine A2a receptor [Source:MGI Symbol;Acc:MGI:99402]	11540	10	75152711	75170618	q	1
NM_029364.4	Gns	1659.49	0.160866	0.0836745	1.92252	0.0545398	0.295249	0.529812	NM_029364	75612	glucosamine (N-acetyl)-6-sulfatase [Source:MGI Symbol;Acc:MGI:1922862]	75612	10	121200995	121233154	q	1
NM_027320.4	Ifi35	146.926	0.284126	0.146684	1.93699	0.0527464	0.295249	0.529812	NM_027320	70110	interferon-induced protein 35 [Source:MGI Symbol;Acc:MGI:1917360]	70110	11	101339233	101349524	q	1
NM_010559.3	Il6ra	287.619	0.223769	0.115638	1.93508	0.0529805	0.295249	0.529812	NM_010559	16194	interleukin 6 receptor, alpha [Source:MGI Symbol;Acc:MGI:105304]	16194	3	89771366	89820503	q	-1
NM_016769.4	Smad3	289.528	-0.38655	0.200564	-1.92732	0.0539401	0.295249	0.529812	NM_016769	17127	SMAD family member 3 [Source:MGI Symbol;Acc:MGI:1201674]	17127	9	63554049	63665276	q	-1
NM_001159538.1	Fgd2	122.85	0.324902	0.163944	1.98178	0.0475033	0.29719	0.526965	NM_001159538	26382	FYVE, RhoGEF and PH domain containing 2 [Source:MGI Symbol;Acc:MGI:1347084]	26382	17	29579888	29598635	q	1
NM_011175.3	Lgmn	4450.87	0.156216	0.0794424	1.96641	0.0492514	0.305297	0.515277	NM_011175	19141	legumain [Source:MGI Symbol;Acc:MGI:1330838]	19141	12	102360343	102406072	q	-1
NM_008913.4	Ppp3ca	31234.4	-0.494557	0.252339	-1.95989	0.050009	0.305297	0.515277	NM_008913	19055	protein phosphatase 3, catalytic subunit, alpha isoform [Source:MGI Symbol;Acc:MGI:107164]	19055	3	136375885	136643488	q	1
NM_029084.3	Slamf8	27.5708	0.542377	0.276682	1.96029	0.0499618	0.305297	0.515277	NM_029084	74748	SLAM family member 8 [Source:MGI Symbol;Acc:MGI:1921998]	74748	1	172409325	172418135	q	-1
NM_009238.2	Sox4	448.536	0.449733	0.23046	1.95146	0.0510025	0.308871	0.510223	NM_009238	20677	SRY (sex determining region Y)-box 4 [Source:MGI Symbol;Acc:MGI:98366]	20677	13	29132902	29137696	q	-1
NM_001190984.1	Lancl1	4631.32	-0.180976	0.0953814	-1.89739	0.0577765	0.309792	0.50893	NM_001190984	14768	LanC (bacterial lantibiotic synthetase component C)-like 1 [Source:MGI Symbol;Acc:MGI:1336997]	14768	1	67039676	67078031	q	-1
NM_022029.2	Nrgn	7395.19	-1.00215	0.515412	-1.94436	0.0518526	0.311527	0.506504	NM_022029	64011	neurogranin [Source:MGI Symbol;Acc:MGI:1927184]	64011	9	37455788	37464200	q	-1
NM_008714.2	Notch1	812.12	0.172904	0.0916651	1.88626	0.0592598	0.314748	0.502038	NM_008714	18128	notch 1 [Source:MGI Symbol;Acc:MGI:97363]	18128	2	26347915	26406675	q	-1
NM_134250.2	Havcr2	63.8303	0.425841	0.226308	1.88169	0.0598785	0.315061	0.501605	NM_134250	171285	hepatitis A virus cellular receptor 2 [Source:MGI Symbol;Acc:MGI:2159682]	171285	11	46345762	46372082	q	1
NM_001135100.1	Il34	1884.01	-0.471892	0.25214	-1.87155	0.0612694	0.316465	0.499675	NM_001135100	76527	interleukin 34 [Source:MGI Symbol;Acc:MGI:1923777]	76527	8	111468461	111532556	q	-1
NM_028732.4	Vsir	1136.2	0.203896	0.108744	1.87502	0.0607906	0.316465	0.499675	NM_028732	74048	V-set immunoregulatory receptor [Source:MGI Symbol;Acc:MGI:1921298]	74048	10	60182630	60208463	q	1
NM_174875.3	Atg4a	593.371	0.185276	0.0994976	1.86211	0.0625873	0.317091	0.498816	NM_174875	666468	autophagy related 4A, cysteine peptidase [Source:MGI Symbol;Acc:MGI:2147903]	666468	X	139857656	139947266	q	1
NM_022325.4	Ctsz	2384.95	0.250282	0.135159	1.85177	0.0640594	0.317091	0.498816	NM_022325	64138	cathepsin Z [Source:MGI Symbol;Acc:MGI:1891190]	64138	2	174269286	174280832	q	-1
NM_029926.5	Irak4	155.603	0.234932	0.126939	1.85074	0.0642067	0.317091	0.498816	NM_029926	266632	interleukin-1 receptor-associated kinase 4 [Source:MGI Symbol;Acc:MGI:2182474]	266632	15	94441524	94479696	q	1
NM_008604.3	Mme	957.584	-0.64413	0.347067	-1.85592	0.0634645	0.317091	0.498816	NM_008604	17380	membrane metallo endopeptidase [Source:MGI Symbol;Acc:MGI:97004]	17380	3	63148958	63293451	q	1
NM_011434.1	Sod1	18989.6	-0.142661	0.0769853	-1.8531	0.0638684	0.317091	0.498816	NM_011434	20655	superoxide dismutase 1, soluble [Source:MGI Symbol;Acc:MGI:98351]	20655	16	90017642	90023217	q	1
NM_181414.5	Pik3c3	986.105	-0.146621	0.0796869	-1.83997	0.0657727	0.322	0.492144	NM_181414	225326	phosphatidylinositol 3-kinase catalytic subunit type 3 [Source:MGI Symbol;Acc:MGI:2445019]	225326	18	30405800	30481179	q	1
NM_009810.2	Casp3	288.059	0.294802	0.153438	1.92131	0.054693	0.326005	0.486776	NM_009810	12367	caspase 3 [Source:MGI Symbol;Acc:MGI:107739]	12367	8	47070326	47092724	q	1
NM_029600.3	Abcc3	95.3827	0.298458	0.155975	1.9135	0.0556836	0.329316	0.482387	NM_029600	76408	ATP-binding cassette, sub-family C member 3 [Source:MGI Symbol;Acc:MGI:1923658]	76408	11	94234121	94283823	q	-1
NM_153098.3	Cd109	102.539	0.60263	0.315948	1.90737	0.0564726	0.331393	0.479656	NM_153098	235505	CD109 antigen [Source:MGI Symbol;Acc:MGI:2445221]	235505	9	78522828	78623535	q	1
NM_009856.2	Cd83	784.238	0.502489	0.265138	1.89519	0.0580667	0.335546	0.474248	NM_009856	12522	CD83 antigen [Source:MGI Symbol;Acc:MGI:1328316]	12522	13	43938251	43956608	q	1
NM_007577.3	C5ar1	49.4154	0.446127	0.247117	1.80532	0.0710242	0.344712	0.462543	NM_007577	12273	complement component 5a receptor 1 [Source:MGI Symbol;Acc:MGI:88232]	12273	7	15980668	15993465	q	-1
NM_147176.2	Homer1	6702.13	-0.501185	0.267226	-1.87551	0.0607226	0.345616	0.461406	NM_147176	26556	homer scaffolding protein 1 [Source:MGI Symbol;Acc:MGI:1347345]	26556	13	93436143	93541637	q	1
NM_133211.3	Tlr7	60.3562	0.466476	0.259601	1.7969	0.0723522	0.348156	0.458226	NM_133211	170743	toll-like receptor 7 [Source:MGI Symbol;Acc:MGI:2176882]	170743	X	166087925	166113554	q	-1
NM_001081304.1	Atf6	1893.72	-0.272298	0.15194	-1.79214	0.0731101	0.348822	0.457396	NM_001081304	226641	activating transcription factor 6 [Source:MGI Symbol;Acc:MGI:1926157]	226641	1	170532243	170695340	q	-1
NM_020004.5	Kat2a	1765.93	-0.132292	0.0710596	-1.86171	0.0626441	0.351271	0.454357	NM_020004	14534	K(lysine) acetyltransferase 2A [Source:MGI Symbol;Acc:MGI:1343101]	14534	11	100595572	100603291	q	-1
NM_027950.1	Osgin1	35.1161	-0.453587	0.243244	-1.86474	0.0622179	0.351271	0.454357	NM_027950	71839	oxidative stress induced growth inhibitor 1 [Source:MGI Symbol;Acc:MGI:1919089]	71839	8	120160863	120172995	q	1
NM_009142.3	Cx3cl1	2838.01	-0.215893	0.120958	-1.78486	0.0742838	0.351443	0.454145	NM_009142	20312	C-X3-C motif chemokine ligand 1 [Source:MGI Symbol;Acc:MGI:1097153]	20312	8	95498637	95509055	q	1
NM_013612.2	Slc11a1	90.5485	0.455434	0.256182	1.77777	0.075441	0.353944	0.451065	NM_013612	18173	solute carrier family 11 (proton-coupled divalent metal ion transporters), member 1 [Source:MGI Symbol;Acc:MGI:1345275]	18173	1	74414354	74425221	q	1
NM_017469.4	Gucy1b1	4811.6	-0.297298	0.168485	-1.76454	0.0776408	0.358929	0.444992	NM_017469	54195	guanylate cyclase 1, soluble, beta 1 [Source:MGI Symbol;Acc:MGI:1860604]	54195	3	81939313	81981996	q	-1
NM_013640.3	Psmb10	215.691	0.276497	0.156769	1.76372	0.0777785	0.358929	0.444992	NM_013640	19171	proteasome (prosome, macropain) subunit, beta type 10 [Source:MGI Symbol;Acc:MGI:1096380]	19171	8	106662367	106665076	q	-1
NM_017466.4	Ccrl2	63.7153	0.353751	0.201134	1.75878	0.0786146	0.359837	0.443894	NM_017466	54199	C-C motif chemokine receptor-like 2 [Source:MGI Symbol;Acc:MGI:1920904]	54199	9	110883554	110886587	q	-1
NM_145429.4	Arrb2	1173.18	0.115338	0.0662093	1.74202	0.0815053	0.3671	0.435216	NM_145429	216869	arrestin, beta 2 [Source:MGI Symbol;Acc:MGI:99474]	216869	11	70323461	70331654	q	1
NM_001284371.1	Atf2	1732.15	-0.152181	0.0872946	-1.7433	0.0812808	0.3671	0.435216	NM_001284371	11909	activating transcription factor 2 [Source:MGI Symbol;Acc:MGI:109349]	11909	2	73646853	73722983	q	-1
NM_009068.3	Ripk1	97.7481	0.307868	0.177503	1.73444	0.08284	0.37015	0.431622	NM_009068	19766	receptor (TNFRSF)-interacting serine-threonine kinase 1 [Source:MGI Symbol;Acc:MGI:108212]	19766	13	34186346	34221130	q	1
NM_013653.1	Ccl5	32.7029	0.693927	0.379563	1.82823	0.0675155	0.370357	0.431379	NM_013653	20304	C-C motif chemokine ligand 5 [Source:MGI Symbol;Acc:MGI:98262]	20304	11	83416604	83421344	q	-1
NM_021887.1	Il21r	66.081	0.353414	0.204666	1.72678	0.0842063	0.373293	0.427951	NM_021887	60504	interleukin 21 receptor [Source:MGI Symbol;Acc:MGI:1890475]	60504	7	125202601	125232742	q	1
NM_009743.4	Bcl2l1	1682.13	-0.13715	0.0799359	-1.71575	0.0862085	0.376585	0.424137	NM_009743	12048	BCL2-like 1 [Source:MGI Symbol;Acc:MGI:88139]	12048	2	152622588	152673648	q	-1
NM_008324.1	Ido1	33.7039	-0.564122	0.328873	-1.71532	0.0862869	0.376585	0.424137	NM_008324	15930	indoleamine 2,3-dioxygenase 1 [Source:MGI Symbol;Acc:MGI:96416]	15930	8	25074152	25087025	q	-1
NM_010442.2	Hmox1	160.986	0.308316	0.180272	1.71029	0.0872131	0.3777	0.422853	NM_010442	15368	heme oxygenase 1 [Source:MGI Symbol;Acc:MGI:96163]	15368	8	75820249	75827217	q	1
NM_021461.5	Mknk1	171.429	-0.230672	0.135492	-1.70248	0.088666	0.381061	0.419006	NM_021461	17346	MAP kinase-interacting serine/threonine kinase 1 [Source:MGI Symbol;Acc:MGI:894316]	17346	4	115696395	115736447	q	1
NM_134437.3	Il17rd	132.548	0.254473	0.150041	1.69602	0.0898826	0.383363	0.41639	NM_134437	171463	interleukin 17 receptor D [Source:MGI Symbol;Acc:MGI:2159727]	171463	14	26760898	26829243	q	1
NM_008369.1	Il3ra	29.1853	0.477237	0.282045	1.69206	0.0906346	0.383664	0.416049	NM_008369	16188	interleukin 3 receptor, alpha chain [Source:MGI Symbol;Acc:MGI:96553]	16188	14	8113752	8123488	q	-1
NM_001081412.2	Bcr	3866.09	-0.426337	0.252507	-1.68841	0.0913316	0.383729	0.415975	NM_001081412	110279	BCR activator of RhoGEF and GTPase [Source:MGI Symbol;Acc:MGI:88141]	110279	10	74896424	75020753	q	1
NM_001004435.2	Pik3r6	86.3172	-0.322343	0.191729	-1.68124	0.0927159	0.38666	0.412671	NM_001004435	104709	phosphoinositide-3-kinase regulatory subunit 5 [Source:MGI Symbol;Acc:MGI:2144613]	104709	11	68393845	68443524	q	1
NM_010260.1	Gbp2	65.5908	0.408706	0.24432	1.67283	0.0943611	0.388145	0.411007	NM_010260	14469	guanylate binding protein 2 [Source:MGI Symbol;Acc:MGI:102772]	14469	3	142326363	142343769	q	1
NM_008360.1	Il18	1780.93	-0.120288	0.0719265	-1.67237	0.0944508	0.388145	0.411007	NM_008360	16173	interleukin 18 [Source:MGI Symbol;Acc:MGI:107936]	16173	9	50466127	50493140	q	1
NM_007761.2	Crcp	285.009	-0.212222	0.127255	-1.6677	0.0953758	0.389106	0.409932	NM_007761	12909	calcitonin gene-related peptide-receptor component protein [Source:MGI Symbol;Acc:MGI:1100818]	12909	5	130058131	130089630	q	1
NM_001003917.3	Atg9a	4120.09	-0.127465	0.0711537	-1.7914	0.073229	0.39596	0.402349	NM_001003917	245860	autophagy related 9A [Source:MGI Symbol;Acc:MGI:2138446]	245860	1	75157504	75168840	q	-1
NM_001276719.1	Ackr2	73.6387	-0.546307	0.334612	-1.63266	0.10254	0.407212	0.39018	NM_001276719	59289	atypical chemokine receptor 2 [Source:MGI Symbol;Acc:MGI:1891697]	59289	9	121727421	121740140	q	1
NM_008153.3	Cmklr1	136.809	0.243699	0.14862	1.63974	0.101058	0.407212	0.39018	NM_008153	14747	chemerin chemokine-like receptor 1 [Source:MGI Symbol;Acc:MGI:109603]	14747	5	113750415	113788487	q	-1
NM_008504.2	Gzmm	42.4698	-0.458926	0.281227	-1.63187	0.102707	0.407212	0.39018	NM_008504	16904	granzyme M (lymphocyte met-ase 1) [Source:MGI Symbol;Acc:MGI:99549]	16904	10	79524854	79531095	q	1
NM_001162365.1	Ptk2b	6696.46	-0.314296	0.192131	-1.63584	0.101873	0.407212	0.39018	NM_001162365	19229	PTK2 protein tyrosine kinase 2 beta [Source:MGI Symbol;Acc:MGI:104908]	19229	14	66390706	66518501	q	-1
NM_021893.2	Cd274	102.185	0.266037	0.163679	1.62536	0.104086	0.409793	0.387435	NM_021893	60533	CD274 antigen [Source:MGI Symbol;Acc:MGI:1926446]	60533	19	29344855	29365495	q	1
NM_001136091.1	Tcirg1	264.843	0.245745	0.15155	1.62155	0.1049	0.410129	0.38708	NM_001136091	27060	T cell, immune regulator 1, ATPase, H+ transporting, lysosomal V0 protein A3 [Source:MGI Symbol;Acc:MGI:1350931]	27060	19	3946050	3957133	q	-1
NM_001286037.1	Ncf1	127.045	0.32154	0.199889	1.6086	0.107704	0.417443	0.379402	NM_001286037	17969	neutrophil cytosolic factor 1 [Source:MGI Symbol;Acc:MGI:97283]	17969	5	134248907	134258479	q	-1
NM_009169.1	Sem1	3285.6	-0.15279	0.0951312	-1.60609	0.108254	0.417443	0.379402	NM_009169	20422	SEM1, 26S proteasome complex subunit [Source:MGI Symbol;Acc:MGI:109238]	20422	6	6557294	6578663	q	-1
NM_173386.4	Cgas	27.9962	0.424311	0.266311	1.59329	0.111095	0.425485	0.371116	NM_173386	214763	cyclic GMP-AMP synthase [Source:MGI Symbol;Acc:MGI:2442261]	214763	9	78337808	78350519	q	-1
NM_007431.3	Alpl	89.5374	-0.305411	0.194153	-1.57304	0.11571	0.429406	0.367132	NM_007431	11647	alkaline phosphatase, liver/bone/kidney [Source:MGI Symbol;Acc:MGI:87983]	11647	4	137469044	137523695	q	-1
NM_007800.1	Ctsg	28.9071	-0.45351	0.287584	-1.57697	0.114804	0.429406	0.367132	NM_007800	13035	cathepsin G [Source:MGI Symbol;Acc:MGI:88563]	13035	14	56337338	56340031	q	-1
NM_008390.1	Irf1	251.152	0.211972	0.134835	1.57208	0.115932	0.429406	0.367132	NM_008390	16362	interferon regulatory factor 1 [Source:MGI Symbol;Acc:MGI:96590]	16362	11	53660841	53669200	q	1
NM_010658.3	Mafb	109.579	0.279122	0.176566	1.58084	0.113915	0.429406	0.367132	NM_010658	16658	MAF bZIP transcription factor B [Source:MGI Symbol;Acc:MGI:104555]	16658	2	160205623	160208985	q	-1
NM_009097.4	Rps6ka1	307.756	0.191648	0.121637	1.57557	0.115125	0.429406	0.367132	NM_009097	20111	ribosomal protein S6 kinase polypeptide 1 [Source:MGI Symbol;Acc:MGI:104558]	20111	4	133574601	133615108	q	-1
NM_007428.3	Agt	1513.34	0.467743	0.302939	1.54402	0.122584	0.434571	0.361939	NM_007428	11606	angiotensinogen [Source:MGI Symbol;Acc:MGI:87963]	11606	8	125283273	125296445	q	-1
NM_008054.2	Fyn	4784.9	0.0909161	0.0585455	1.55291	0.120444	0.434571	0.361939	NM_008054	14360	Fyn proto-oncogene [Source:MGI Symbol;Acc:MGI:95602]	14360	10	39244851	39441377	q	1
NM_008689.2	Nfkb1	506.502	0.13063	0.0844704	1.54646	0.121993	0.434571	0.361939	NM_008689	18033	nuclear factor of kappa light polypeptide gene enhancer in B cells 1, p105 [Source:MGI Symbol;Acc:MGI:97312]	18033	3	135290416	135397308	q	-1
NM_145857.2	Nod2	48.4134	0.337446	0.217561	1.55104	0.120892	0.434571	0.361939	NM_145857	257632	nucleotide-binding oligomerization domain containing 2 [Source:MGI Symbol;Acc:MGI:2429397]	257632	8	89373943	89415102	q	1
NM_011529.2	Tank	2266.14	-0.136371	0.0879227	-1.55103	0.120894	0.434571	0.361939	NM_011529	21353	TRAF family member-associated Nf-kappa B activator [Source:MGI Symbol;Acc:MGI:107676]	21353	2	61408929	61484515	q	1
NM_009515.2	Was	72.4483	0.260076	0.168507	1.54342	0.12273	0.434571	0.361939	NM_009515	22376	Wiskott-Aldrich syndrome [Source:MGI Symbol;Acc:MGI:105059]	22376	X	7947692	7956737	q	-1
NM_009539.2	Zap70	114.988	0.598242	0.382874	1.56251	0.118169	0.434571	0.361939	NM_009539	22637	zeta-chain (TCR) associated protein kinase [Source:MGI Symbol;Acc:MGI:99613]	22637	1	36800879	36821899	q	1
NM_175103.3	Bola2	3479.58	-0.128086	0.0738129	-1.73527	0.0826925	0.43775	0.358774	NM_175103	66162	bolA family member 2 [Source:MGI Symbol;Acc:MGI:1913412]	66162	7	126294573	126298970	q	1
NM_009141.3	Cxcl5	41.9091	0.455819	0.299568	1.52159	0.128112	0.444072	0.352546	NM_009141	20311	C-X-C motif chemokine ligand 5 [Source:MGI Symbol;Acc:MGI:1096868]	20311	5	90907219	90909483	q	1
NM_015797.3	Fbxo6	329.74	-0.149361	0.0984968	-1.5164	0.129418	0.444072	0.352546	NM_015797	50762	F-box protein 6 [Source:MGI Symbol;Acc:MGI:1354743]	50762	4	148230173	148236597	q	-1
NM_024198.3	Gpx7	181.679	-0.233236	0.153966	-1.51486	0.129809	0.444072	0.352546	NM_024198	67305	glutathione peroxidase 7 [Source:MGI Symbol;Acc:MGI:1914555]	67305	4	108257587	108264158	q	-1
NM_207105.2	H2-Ab1	73.4657	0.462822	0.30579	1.51353	0.130145	0.444072	0.352546	NM_207105	14961	histocompatibility 2, class II antigen A, beta 1 [Source:MGI Symbol;Acc:MGI:103070]	14961	17	34476663	34488393	q	1
NM_001324486.1	Il10ra	200.231	0.220517	0.145284	1.51784	0.129055	0.444072	0.352546	NM_001324486	16154	interleukin 10 receptor, alpha [Source:MGI Symbol;Acc:MGI:96538]	16154	9	45165135	45180447	q	-1
NM_009044.2	Rel	223.867	0.187033	0.123332	1.51649	0.129395	0.444072	0.352546	NM_009044	19696	reticuloendotheliosis oncogene [Source:MGI Symbol;Acc:MGI:97897]	19696	11	23686847	23720970	q	-1
NM_009970.2	Csf2ra	117.993	0.245281	0.163035	1.50447	0.132459	0.446439	0.350238	NM_009970	12982	colony stimulating factor 2 receptor, alpha, low-affinity (granulocyte-macrophage) [Source:MGI Symbol;Acc:MGI:1339754]	12982	19	61212395	61216867	q	-1
NM_001160411.1	Gstm4	272.358	-0.168645	0.112335	-1.50127	0.133286	0.446439	0.350238	NM_001160411	14865	glutathione S-transferase, mu 4 [Source:MGI Symbol;Acc:MGI:95862]	14865	3	107947724	107952210	q	-1
NM_008416.1	Junb	1670.86	-0.500129	0.33376	-1.49847	0.134011	0.446439	0.350238	NM_008416	16477	jun B proto-oncogene [Source:MGI Symbol;Acc:MGI:96647]	16477	8	85701113	85705347	q	-1
NM_011594.3	Timp2	8210.8	0.283605	0.188757	1.50249	0.132971	0.446439	0.350238	NM_011594	21858	tissue inhibitor of metalloproteinase 2 [Source:MGI Symbol;Acc:MGI:98753]	21858	11	118191887	118246566	q	-1
NM_011785.3	Akt3	6832.05	-0.181301	0.12159	-1.49109	0.135938	0.447012	0.349681	NM_011785	23797	thymoma viral proto-oncogene 3 [Source:MGI Symbol;Acc:MGI:1345147]	23797	1	176847639	177085769	q	-1
NM_009138.3	Ccl25	238.73	-0.212259	0.143157	-1.4827	0.138153	0.447012	0.349681	NM_009138	20300	C-C motif chemokine ligand 25 [Source:MGI Symbol;Acc:MGI:1099448]	20300	8	4375210	4410020	q	1
NM_025730.3	Lrrk2	2349.4	-0.423359	0.285243	-1.4842	0.137755	0.447012	0.349681	NM_025730	66725	leucine-rich repeat kinase 2 [Source:MGI Symbol;Acc:MGI:1913975]	66725	15	91557378	91700323	q	1
NM_001038839.2	P2rx7	358.736	0.166013	0.111918	1.48334	0.137983	0.447012	0.349681	NM_001038839	18439	purinergic receptor P2X, ligand-gated ion channel, 7 [Source:MGI Symbol;Acc:MGI:1339957]	18439	5	122781974	122829495	q	1
NM_009505.4	Vegfa	2525.85	-0.171487	0.114948	-1.49186	0.135735	0.447012	0.349681	NM_009505	22339	vascular endothelial growth factor A [Source:MGI Symbol;Acc:MGI:103178]	22339	17	46327919	46343295	q	-1
NM_027808.1	Alpk1	208.676	0.287571	0.194737	1.47672	0.139752	0.448521	0.348217	NM_027808	71481	alpha-kinase 1 [Source:MGI Symbol;Acc:MGI:1918731]	71481	3	127463959	127574176	q	-1
NM_001013371.2	Dtx3l	146.486	0.258203	0.175053	1.475	0.140213	0.448521	0.348217	NM_001013371	209200	deltex 3-like, E3 ubiquitin ligase [Source:MGI Symbol;Acc:MGI:2656973]	209200	16	35746881	35759521	q	-1
NM_023844.4	Jam2	2232.85	0.20407	0.119343	1.70995	0.0872755	0.45073	0.346084	NM_023844	67374	junction adhesion molecule 2 [Source:MGI Symbol;Acc:MGI:1933820]	67374	16	84571011	84622816	q	1
NM_001177810.1	Rapgef3	1406.41	0.209802	0.123023	1.70539	0.0881216	0.45073	0.346084	NM_001177810	223864	Rap guanine nucleotide exchange factor (GEF) 3 [Source:MGI Symbol;Acc:MGI:2441741]	223864	15	97642651	97665853	q	-1
NM_028261.1	Tmem173	84.6351	0.338498	0.198368	1.70641	0.0879309	0.45073	0.346084	NM_028261	72512	stimulator of interferon response cGAMP interactor 1 [Source:MGI Symbol;Acc:MGI:1919762]	72512	18	35866732	35873607	q	-1
NM_009987.4	Cx3cr1	743.927	0.226046	0.154034	1.46751	0.142238	0.451528	0.345316	NM_009987	13051	C-X3-C motif chemokine receptor 1 [Source:MGI Symbol;Acc:MGI:1333815]	13051	9	119877749	119898945	q	-1
NM_027835.2	Ifih1	188.543	0.266823	0.182057	1.4656	0.142757	0.451528	0.345316	NM_027835	71586	interferon induced with helicase C domain 1 [Source:MGI Symbol;Acc:MGI:1918836]	71586	2	62426142	62476599	q	-1
NM_207655.2	Egfr	250.936	0.187875	0.111074	1.69144	0.0907523	0.457996	0.339138	NM_207655	13649	epidermal growth factor receptor [Source:MGI Symbol;Acc:MGI:95294]	13649	11	16702203	16868158	q	1
NM_011261.2	Reln	1416.77	-0.61041	0.360365	-1.69387	0.0902905	0.457996	0.339138	NM_011261	19699	reelin [Source:MGI Symbol;Acc:MGI:103022]	19699	5	22089452	22549700	q	-1
NM_138666.3	Nlgn1	5800.17	-0.377227	0.223951	-1.68442	0.0921012	0.458247	0.3389	NM_138666	192167	neuroligin 1 [Source:MGI Symbol;Acc:MGI:2179435]	192167	3	25480379	26386609	q	-1
NM_198006.4	Coa5	2286.98	-0.176694	0.106335	-1.66167	0.0965783	0.469264	0.328583	NM_198006	76178	cytochrome C oxidase assembly factor 5 [Source:MGI Symbol;Acc:MGI:1923428]	76178	1	37456165	37469184	q	-1
NM_183031.2	Gpr183	80.657	0.304018	0.183028	1.66105	0.0967043	0.469264	0.328583	NM_183031	321019	G protein-coupled receptor 183 [Source:MGI Symbol;Acc:MGI:2442034]	321019	14	122189963	122202607	q	-1
NM_001040398.1	Setd1b	1269.35	-0.147685	0.0886167	-1.66656	0.0956012	0.469264	0.328583	NM_001040398	208043	SET domain containing 1B [Source:MGI Symbol;Acc:MGI:2652820]	208043	5	123280256	123306692	q	1
NM_008250.2	Hlx	85.5337	0.271238	0.188527	1.43872	0.150229	0.472507	0.325592	NM_008250	15284	H2.0-like homeobox [Source:MGI Symbol;Acc:MGI:96109]	15284	1	184459337	184464816	q	-1
NM_198862.2	Nlgn2	6541.82	-0.154236	0.093231	-1.65434	0.0980587	0.472806	0.325317	NM_198862	216856	neuroligin 2 [Source:MGI Symbol;Acc:MGI:2681835]	216856	11	69713948	69728610	q	-1
NM_010388.4	H2-DMb2	89.0229	-0.403445	0.281522	-1.43309	0.151833	0.474901	0.323397	NM_010388	15000	histocompatibility 2, class II, locus Mb2 [Source:MGI Symbol;Acc:MGI:95923]	15000	17	34362281	34370529	q	1
NM_021524.1	Nampt	1549.08	-0.122896	0.0862218	-1.42535	0.154057	0.47501	0.323297	NM_021524	59027	nicotinamide phosphoribosyltransferase [Source:MGI Symbol;Acc:MGI:1929865]	59027	12	32869544	32903348	q	1
NM_023699.3	Nfatc4	44.5595	-0.297998	0.209244	-1.42416	0.154399	0.47501	0.323297	NM_023699	73181	nuclear factor of activated T cells, cytoplasmic, calcineurin dependent 4 [Source:MGI Symbol;Acc:MGI:1920431]	73181	14	56060601	56071400	q	1
NM_011101.3	Prkca	1364.1	-0.331041	0.231833	-1.42793	0.153311	0.47501	0.323297	NM_011101	18750	protein kinase C, alpha [Source:MGI Symbol;Acc:MGI:97595]	18750	11	107824213	108234754	q	-1
NM_001177752.1	Pfkfb3	863.672	-0.306073	0.216932	-1.41091	0.15827	0.484271	0.314911	NM_001177752	170768	6-phosphofructo-2-kinase/fructose-2,6-biphosphatase 3 [Source:MGI Symbol;Acc:MGI:2181202]	170768	2	11476244	11558888	q	-1
NM_007981.3	Acsl1	604.464	-0.11359	0.0808319	-1.40526	0.159943	0.486746	0.312697	NM_007981	14081	acyl-CoA synthetase long-chain family member 1 [Source:MGI Symbol;Acc:MGI:102797]	14081	8	46924074	46989088	q	1
NM_001083334.1	Bin1	5986.44	-0.137885	0.0860744	-1.60193	0.109171	0.492585	0.307519	NM_001083334	30948	bridging integrator 1 [Source:MGI Symbol;Acc:MGI:108092]	30948	18	32510283	32568790	q	1
NM_007808.4	Cycs	128.385	-0.236769	0.146002	-1.62168	0.104872	0.492585	0.307519	NM_007808	13063	cytochrome c, somatic [Source:MGI Symbol;Acc:MGI:88578]	13063	6	50539543	50543518	q	-1
NM_001039195.1	Gria2	9806.61	-0.368492	0.226594	-1.62622	0.103903	0.492585	0.307519	NM_001039195	14800	glutamate receptor, ionotropic, AMPA2 (alpha 2) [Source:MGI Symbol;Acc:MGI:95809]	14800	3	80588757	80710142	q	-1
NM_023516.5	Hilpda	125.11	-0.224281	0.139474	-1.60805	0.107824	0.492585	0.307519	NM_023516	69573	hypoxia inducible lipid droplet associated [Source:MGI Symbol;Acc:MGI:1916823]	69573	6	29272487	29275445	q	1
NM_013595.2	Mbd3	1657.97	-0.134431	0.0840597	-1.59923	0.109769	0.492585	0.307519	NM_013595	17192	methyl-CpG binding domain protein 3 [Source:MGI Symbol;Acc:MGI:1333812]	17192	10	80228373	80235384	q	-1
NM_181547.3	Nostrin	157.356	-0.211184	0.131873	-1.60143	0.109282	0.492585	0.307519	NM_181547	329416	nitric oxide synthase trafficker [Source:MGI Symbol;Acc:MGI:3606242]	329416	2	68966144	69019674	q	1
NM_011237.2	Rad9a	294.223	-0.178691	0.111921	-1.59659	0.110357	0.492585	0.307519	NM_011237	19367	RAD9 checkpoint clamp component A [Source:MGI Symbol;Acc:MGI:1328356]	19367	19	4245195	4251661	q	-1
NM_025963.3	Rps10	3297.74	-0.116946	0.0722965	-1.61758	0.105752	0.492585	0.307519	NM_025963	67097	ribosomal protein S10 [Source:MGI Symbol;Acc:MGI:1914347]	67097	17	27849392	27855643	q	-1
NM_144907.1	Sesn2	200.048	0.277183	0.173737	1.59541	0.11062	0.492585	0.307519	NM_144907	230784	sestrin 2 [Source:MGI Symbol;Acc:MGI:2651874]	230784	4	132219343	132237812	q	-1
NM_178029.3	Setd1a	1212.75	-0.154447	0.0957627	-1.61281	0.106787	0.492585	0.307519	NM_178029	233904	SET domain containing 1A [Source:MGI Symbol;Acc:MGI:2446244]	233904	7	127375842	127399294	q	1
NM_009370.2	Tgfbr1	1253.52	0.24371	0.14989	1.62592	0.103966	0.492585	0.307519	NM_009370	21812	transforming growth factor, beta receptor I [Source:MGI Symbol;Acc:MGI:98728]	21812	4	47353222	47414931	q	1
NM_022653.4	Thop1	740.631	-0.122241	0.0878791	-1.39101	0.164222	0.49708	0.303574	NM_022653	50492	thimet oligopeptidase 1 [Source:MGI Symbol;Acc:MGI:1354165]	50492	10	80905869	80918393	q	1
NM_008677.2	Ncf4	88.7009	0.267142	0.193604	1.37984	0.167637	0.504705	0.296962	NM_008677	17972	neutrophil cytosolic factor 4 [Source:MGI Symbol;Acc:MGI:109186]	17972	15	78129001	78146780	q	1
NM_011610.3	Tnfrsf1b	70.9047	0.320179	0.20299	1.57732	0.114723	0.507868	0.29425	NM_011610	21938	tumor necrosis factor receptor superfamily, member 1b [Source:MGI Symbol;Acc:MGI:1314883]	21938	4	144940033	144973440	q	-1
NM_019949.2	Ube2l6	172.76	0.257434	0.187443	1.3734	0.169628	0.507982	0.294151	NM_019949	56791	ubiquitin-conjugating enzyme E2L 6 [Source:MGI Symbol;Acc:MGI:1914500]	56791	2	84629172	84640679	q	1
NM_010387.3	H2-DMb1	147.686	0.279214	0.203767	1.37026	0.170605	0.508203	0.293963	NM_010387	14999	histocompatibility 2, class II, locus Mb1 [Source:MGI Symbol;Acc:MGI:95922]	14999	17	34372046	34379204	q	1
NM_007635.4	Ccng2	1201.03	-0.264221	0.169147	-1.56208	0.11827	0.509169	0.293138	NM_007635	12452	cyclin G2 [Source:MGI Symbol;Acc:MGI:1095734]	12452	5	93415116	93424090	q	1
NM_001159652.1	Gpr62	827.942	-0.227607	0.146455	-1.55411	0.120158	0.509169	0.293138	NM_001159652	436090	G protein-coupled receptor 62 [Source:MGI Symbol;Acc:MGI:3525078]	436090	9	106341161	106343137	q	-1
NM_001113553.1	Irak2	465.893	-0.150224	0.0962673	-1.56048	0.118646	0.509169	0.293138	NM_001113553	108960	interleukin-1 receptor-associated kinase 2 [Source:MGI Symbol;Acc:MGI:2429603]	108960	6	113615428	113671987	q	1
NM_008209.4	Mr1	249.875	0.283619	0.18064	1.57008	0.116397	0.509169	0.293138	NM_008209	15064	major histocompatibility complex, class I-related [Source:MGI Symbol;Acc:MGI:1195463]	15064	1	155003023	155022560	q	-1
NM_009104.1	Rrm2	73.1946	0.465777	0.29934	1.55601	0.119705	0.509169	0.293138	NM_009104	20135	ribonucleotide reductase M2 [Source:MGI Symbol;Acc:MGI:98181]	20135	12	24758240	24764145	q	1
NM_011158.3	Prkar2b	3698.64	-0.370494	0.239728	-1.54548	0.122231	0.51405	0.288994	NM_011158	19088	protein kinase, cAMP dependent regulatory, type II beta [Source:MGI Symbol;Acc:MGI:97760]	19088	12	32008475	32111295	q	-1
NM_013819.2	H2-M3	92.3685	0.320601	0.235939	1.35883	0.1742	0.516182	0.287197	NM_013819	14991	histocompatibility 2, M region locus 3 [Source:MGI Symbol;Acc:MGI:95915]	14991	17	37581111	37585375	q	1
NM_010736.4	Ltbr	42.1426	0.30684	0.226652	1.35379	0.175803	0.518205	0.285499	NM_010736	17000	lymphotoxin B receptor [Source:MGI Symbol;Acc:MGI:104875]	17000	6	125283534	125290848	q	-1
NM_007780.4	Csf2rb	38.1277	0.429457	0.318155	1.34984	0.177068	0.519216	0.284652	NM_007780	12983	colony stimulating factor 2 receptor, beta, low-affinity (granulocyte-macrophage) [Source:MGI Symbol;Acc:MGI:1339759]	12983	15	78209952	78238047	q	1
NM_009760.4	Bnip3	4917.11	-0.0939579	0.0699327	-1.34355	0.179095	0.519744	0.28421	NM_009760	12176	BCL2/adenovirus E1B interacting protein 3 [Source:MGI Symbol;Acc:MGI:109326]	12176	7	138492565	138511248	q	-1
NM_009546.2	Trim25	258.827	0.172495	0.128295	1.34452	0.178782	0.519744	0.28421	NM_009546	217069	tripartite motif-containing 25 [Source:MGI Symbol;Acc:MGI:102749]	217069	11	88890202	88911119	q	1
NM_009790.5	Calm1	64047.6	-0.0849171	0.0635648	-1.33591	0.181577	0.520274	0.283768	NM_009790	12313	calmodulin 1 [Source:MGI Symbol;Acc:MGI:88251]	12313	12	100165694	100176073	q	1
NM_010549.3	Il11ra1/2	402.09	0.132945	0.0996238	1.33447	0.18205	0.520274	0.283768	NM_010549	16157	interleukin 11 receptor subunit alpha 1 [Source:MGI Symbol;Acc:MGI:107426]	16157	4	41699989	41769474	q	1
NM_008517.2	Lta4h	1783.32	-0.104761	0.0781741	-1.3401	0.180214	0.520274	0.283768	NM_008517	16993	leukotriene A4 hydrolase [Source:MGI Symbol;Acc:MGI:96836]	16993	10	93289273	93320737	q	1
NM_007658.3	Cdc25a	318.274	0.261375	0.170466	1.5333	0.125202	0.523635	0.280972	NM_007658	12530	cell division cycle 25A [Source:MGI Symbol;Acc:MGI:103198]	12530	9	109704647	109722963	q	1
NM_001042605.1	Cd74	193.166	0.441373	0.288544	1.52965	0.126102	0.524061	0.280618	NM_001042605	16149	CD74 antigen (invariant polypeptide of major histocompatibility complex, class II antigen-associated) [Source:MGI Symbol;Acc:MGI:96534]	16149	18	60936920	60945724	q	1
NM_008608.3	Mmp14	254.005	0.227872	0.1492	1.52729	0.126689	0.524061	0.280618	NM_008608	17387	matrix metallopeptidase 14 (membrane-inserted) [Source:MGI Symbol;Acc:MGI:101900]	17387	14	54669069	54682821	q	1
NM_001110208.1	Akt2	2908.14	-0.269786	0.203515	-1.32563	0.184961	0.525924	0.279077	NM_001110208	11652	thymoma viral proto-oncogene 2 [Source:MGI Symbol;Acc:MGI:104874]	11652	7	27290977	27340251	q	1
NM_025770.3	Atg10	236.214	-0.153681	0.11661	-1.31791	0.187535	0.526852	0.278311	NM_025770	66795	autophagy related 10 [Source:MGI Symbol;Acc:MGI:1914045]	66795	13	91083475	91372087	q	-1
NM_016923.1	Ly96	128.867	0.24184	0.183736	1.31624	0.188095	0.526852	0.278311	NM_016923	17087	lymphocyte antigen 96 [Source:MGI Symbol;Acc:MGI:1341909]	17087	1	16758275	16779835	q	1
NM_009367.1	Tgfb2	306.897	0.324393	0.24621	1.31755	0.187656	0.526852	0.278311	NM_009367	21808	transforming growth factor, beta 2 [Source:MGI Symbol;Acc:MGI:98726]	21808	1	186354989	186438186	q	-1
NM_024264.3	Cyp27a1	294.3	-0.265138	0.174309	-1.52108	0.128239	0.527592	0.277701	NM_024264	104086	cytochrome P450, family 27, subfamily a, polypeptide 1 [Source:MGI Symbol;Acc:MGI:88594]	104086	1	74752733	74777051	q	1
NM_207653.3	Cflar	441.307	0.128983	0.0983248	1.31181	0.189586	0.5284	0.277037	NM_207653	12633	CASP8 and FADD-like apoptosis regulator [Source:MGI Symbol;Acc:MGI:1336166]	12633	1	58750667	58798043	q	1
NM_001001984.2	Kdm2a	1699.99	-0.121595	0.0801538	-1.51702	0.129262	0.528927	0.276604	NM_001001984	225876	lysine (K)-specific demethylase 2A [Source:MGI Symbol;Acc:MGI:1354736]	225876	19	4364447	4448313	q	-1
NM_025587.2	Rps21	29270	-0.134753	0.0894708	-1.50611	0.132039	0.537384	0.269715	NM_025587	66481	ribosomal protein S21 [Source:MGI Symbol;Acc:MGI:1913731]	66481	2	179899170	179900238	q	1
NM_001177849.1	Asph	4943.01	-0.0944474	0.062852	-1.5027	0.132918	0.538067	0.269163	NM_001177849	65973	aspartate-beta-hydroxylase [Source:MGI Symbol;Acc:MGI:1914186]	65973	4	9448069	9669344	q	-1
NM_172132.1	Kdm4b	1883.16	-0.209244	0.139501	-1.49994	0.133629	0.53807	0.269161	NM_172132	193796	lysine (K)-specific demethylase 4B [Source:MGI Symbol;Acc:MGI:2442355]	193796	17	56633062	56709870	q	1
NM_033602.2	Peli2	666.144	-0.135078	0.104503	-1.29258	0.196155	0.53871	0.268645	NM_033602	93834	pellino 2 [Source:MGI Symbol;Acc:MGI:1891445]	93834	14	48358280	48519032	q	1
NM_148945.1	Rps6ka3	2181.42	-0.210875	0.163142	-1.29259	0.196153	0.53871	0.268645	NM_148945	110651	ribosomal protein S6 kinase polypeptide 3 [Source:MGI Symbol;Acc:MGI:104557]	110651	X	157993303	158151240	q	1
NM_001198977.1	Syk	84.3523	0.213301	0.164646	1.29551	0.195144	0.53871	0.268645	NM_001198977	20963	spleen tyrosine kinase [Source:MGI Symbol;Acc:MGI:99515]	20963	13	52737209	52802828	q	1
NM_008567.1	Mcm6	157.028	0.22189	0.148457	1.49464	0.135009	0.53927	0.268193	NM_008567	17219	minichromosome maintenance complex component 6 [Source:MGI Symbol;Acc:MGI:1298227]	17219	1	128259327	128287401	q	-1
NM_011234.4	Rad51	46.2196	0.338675	0.226792	1.49333	0.135352	0.53927	0.268193	NM_011234	19361	RAD51 recombinase [Source:MGI Symbol;Acc:MGI:97890]	19361	2	118943274	118977926	q	1
NM_007985.2	Fancc	262.969	-0.151012	0.101339	-1.49017	0.13618	0.53973	0.267823	NM_007985	14088	Fanconi anemia, complementation group C [Source:MGI Symbol;Acc:MGI:95480]	14088	13	63432857	63645092	q	-1
NM_001111060.2	Cd59a	630.07	-0.157619	0.122945	-1.28202	0.199834	0.540938	0.266853	NM_001111060	12509	CD59a antigen [Source:MGI Symbol;Acc:MGI:109177]	12509	2	103926146	103945699	q	1
NM_010693.2	Lck	65.3725	-0.361162	0.281721	-1.28198	0.199849	0.540938	0.266853	NM_010693	16818	lymphocyte protein tyrosine kinase [Source:MGI Symbol;Acc:MGI:96756]	16818	4	129442137	129467434	q	-1
NM_177740.5	Rgma	939.948	0.176306	0.137234	1.28471	0.198892	0.540938	0.266853	NM_177740	244058	repulsive guidance molecule family member A [Source:MGI Symbol;Acc:MGI:2679262]	244058	7	73025257	73069647	q	1
NM_008964.3	Ptger2	44.1854	-0.394189	0.308568	-1.27748	0.201434	0.542619	0.265505	NM_008964	19217	prostaglandin E receptor 2 (subtype EP2) [Source:MGI Symbol;Acc:MGI:97794]	19217	14	45225652	45241277	q	1
NM_019827.3	Gsk3b	6441.44	-0.116083	0.0913113	-1.27129	0.203625	0.545909	0.26288	NM_019827	56637	glycogen synthase kinase 3 beta [Source:MGI Symbol;Acc:MGI:1861437]	56637	16	37909363	38066446	q	1
NM_001033245.4	Hk3	80.0817	0.208274	0.164604	1.2653	0.205762	0.547898	0.2613	NM_001033245	212032	hexokinase 3 [Source:MGI Symbol;Acc:MGI:2670962]	212032	13	55153798	55169198	q	-1
NM_198297.4	Trat1	52.4604	-0.458168	0.362541	-1.26377	0.206313	0.547898	0.2613	NM_198297	77647	T cell receptor associated transmembrane adaptor 1 [Source:MGI Symbol;Acc:MGI:1924897]	77647	16	48551137	48592384	q	-1
NM_170702.2	Cd40	34.5922	-0.363578	0.288488	-1.26029	0.207565	0.548634	0.260718	NM_170702	21939	CD40 antigen [Source:MGI Symbol;Acc:MGI:88336]	21939	2	164897547	164914868	q	1
NM_001039364.2	Mobp	35144.5	-0.25033	0.169439	-1.4774	0.139568	0.550276	0.25942	NM_001039364	NA	NA	NA	NA	NA	NA	NA	NA
NM_007573.2	C1qbp	3382.85	-0.091041	0.0731255	-1.245	0.213133	0.552186	0.257915	NM_007573	12261	complement component 1, q subcomponent binding protein [Source:MGI Symbol;Acc:MGI:1194505]	12261	11	70868662	70873852	q	-1
NM_009913.6	Ccr9	29.7957	-0.363902	0.292272	-1.24508	0.213102	0.552186	0.257915	NM_009913	12769	C-C motif chemokine receptor 9 [Source:MGI Symbol;Acc:MGI:1341902]	12769	9	123507504	123613395	q	1
NM_001008700.3	Il4ra	289.355	0.292467	0.234727	1.24599	0.212769	0.552186	0.257915	NM_001008700	16190	interleukin 4 receptor, alpha [Source:MGI Symbol;Acc:MGI:105367]	16190	7	125151292	125178646	q	1
NM_001164172.1	Map2k7	1424.42	-0.112959	0.0908651	-1.24315	0.213813	0.552186	0.257915	NM_001164172	26400	mitogen-activated protein kinase kinase 7 [Source:MGI Symbol;Acc:MGI:1346871]	26400	8	4288740	4297897	q	1
NM_172203.1	Nox1	28.4632	-0.420983	0.33739	-1.24776	0.212118	0.552186	0.257915	NM_172203	237038	NADPH oxidase 1 [Source:MGI Symbol;Acc:MGI:2450016]	237038	X	132987170	133122705	q	-1
NM_001134383.1	Iqsec1	7126.66	-0.128155	0.0872552	-1.46874	0.141904	0.553719	0.256711	NM_001134383	232227	IQ motif and Sec7 domain 1 [Source:MGI Symbol;Acc:MGI:1196356]	232227	6	90633070	90965667	q	-1
NM_001131054.1	Pttg1	3130.52	-0.157788	0.107312	-1.47036	0.141465	0.553719	0.256711	NM_001131054	30939	pituitary tumor-transforming gene 1 [Source:MGI Symbol;Acc:MGI:1353578]	30939	11	43311077	43317078	q	-1
NM_009812.2	Casp8	110.174	0.196873	0.159407	1.23504	0.216816	0.553853	0.256605	NM_009812	12370	caspase 8 [Source:MGI Symbol;Acc:MGI:1261423]	12370	1	58834533	58886662	q	1
NM_054059.1	Ceacam3	30.0093	0.367721	0.298763	1.23081	0.218393	0.553853	0.256605	NM_054059	384557	CEA cell adhesion molecule 3 [Source:MGI Symbol;Acc:MGI:3646296]	384557	7	16884207	16898178	q	1
NM_019739.3	Foxo1	2415.67	-0.35324	0.286197	-1.23425	0.217108	0.553853	0.256605	NM_019739	56458	forkhead box O1 [Source:MGI Symbol;Acc:MGI:1890077]	56458	3	52175757	52260642	q	1
NM_009277.2	Trim21	67.6198	0.226871	0.184082	1.23244	0.217784	0.553853	0.256605	NM_009277	20821	tripartite motif-containing 21 [Source:MGI Symbol;Acc:MGI:106657]	20821	7	102207128	102214693	q	-1
NM_009849.2	Entpd2	241.054	0.235686	0.161253	1.46158	0.143855	0.558453	0.253013	NM_009849	12496	ectonucleoside triphosphate diphosphohydrolase 2 [Source:MGI Symbol;Acc:MGI:1096863]	12496	2	25285886	25291333	q	1
NM_007722.3	Ackr3	96.4886	-0.199739	0.163637	-1.22062	0.222229	0.558549	0.252939	NM_007722	12778	atypical chemokine receptor 3 [Source:MGI Symbol;Acc:MGI:109562]	12778	1	90131702	90144473	q	1
NM_010121.3	Eif2ak3	403.186	0.154253	0.126214	1.22215	0.221649	0.558549	0.252939	NM_010121	13666	eukaryotic translation initiation factor 2 alpha kinase 3 [Source:MGI Symbol;Acc:MGI:1341830]	13666	6	70821499	70882229	q	1
NM_133957.3	Nfat5	1162.68	-0.135905	0.111625	-1.21751	0.223408	0.559017	0.252575	NM_133957	54446	nuclear factor of activated T cells 5 [Source:MGI Symbol;Acc:MGI:1859333]	54446	8	108020102	108106149	q	1
NM_007646.5	Cd38	638.954	0.273268	0.225295	1.21293	0.225155	0.560896	0.251118	NM_007646	12494	CD38 antigen [Source:MGI Symbol;Acc:MGI:107474]	12494	5	44025895	44069717	q	1
NM_001160403.1	Il1rapl1	591.76	-0.169438	0.140359	-1.20717	0.227366	0.563909	0.248791	NM_001160403	331461	interleukin 1 receptor accessory protein-like 1 [Source:MGI Symbol;Acc:MGI:2687319]	331461	X	85784476	87159251	q	-1
NM_001122733.1	Kit	445.037	-0.44382	0.305379	-1.45334	0.146129	0.564386	0.248424	NM_001122733	16590	KIT proto-oncogene receptor tyrosine kinase [Source:MGI Symbol;Acc:MGI:96677]	16590	5	75735576	75817382	q	1
NM_009483.1	Kdm6a	630.307	-0.283552	0.195873	-1.44763	0.147721	0.566178	0.247047	NM_009483	22289	lysine (K)-specific demethylase 6A [Source:MGI Symbol;Acc:MGI:1095419]	22289	X	18028814	18146175	q	1
NM_011809.2	Ets2	1605.41	-0.267737	0.186429	-1.43614	0.150963	0.572897	0.241924	NM_011809	23872	E26 avian leukemia oncogene 2, 3' domain [Source:MGI Symbol;Acc:MGI:95456]	23872	16	95502942	95522095	q	1
NM_009776.3	Serping1	137.519	0.224288	0.156326	1.43475	0.15136	0.572897	0.241924	NM_009776	12258	serine (or cysteine) peptidase inhibitor, clade G, member 1 [Source:MGI Symbol;Acc:MGI:894696]	12258	2	84595731	84605788	q	-1
NM_009890.1	Ch25h	24.2431	0.460072	0.321481	1.4311	0.152401	0.573342	0.241587	NM_009890	12642	cholesterol 25-hydroxylase [Source:MGI Symbol;Acc:MGI:1333869]	12642	19	34451178	34452564	q	-1
NM_009594.4	Abl1	1005.45	-0.140281	0.098742	-1.42068	0.155409	0.574814	0.240472	NM_009594	11350	c-abl oncogene 1, non-receptor tyrosine kinase [Source:MGI Symbol;Acc:MGI:87859]	11350	2	31578388	31694239	q	1
NM_007913.5	Egr1	5991.61	-0.645191	0.45499	-1.41804	0.15618	0.574814	0.240472	NM_007913	13653	early growth response 1 [Source:MGI Symbol;Acc:MGI:95295]	13653	18	34992876	34998037	q	1
NM_008914.2	Ppp3cb	8208.82	-0.11035	0.0778647	-1.41721	0.156422	0.574814	0.240472	NM_008914	19056	protein phosphatase 3, catalytic subunit, beta isoform [Source:MGI Symbol;Acc:MGI:107163]	19056	14	20549432	20596641	q	-1
NM_011100.3	Prkacb	8791.94	-0.185189	0.130469	-1.41941	0.15578	0.574814	0.240472	NM_011100	18749	protein kinase, cAMP dependent, catalytic, beta [Source:MGI Symbol;Acc:MGI:97594]	18749	3	146435329	146518745	q	-1
NM_030150.2	Dhx58	163.271	0.207972	0.175205	1.18702	0.235218	0.578972	0.237342	NM_030150	80861	DExH-box helicase 58 [Source:MGI Symbol;Acc:MGI:1931560]	80861	11	100585710	100595097	q	-1
NM_010907.2	Nfkbia	284.668	-0.175065	0.14757	-1.18632	0.235497	0.578972	0.237342	NM_010907	18035	nuclear factor of kappa light polypeptide gene enhancer in B cells inhibitor, alpha [Source:MGI Symbol;Acc:MGI:104741]	18035	12	55536195	55539432	q	-1
NM_026790.2	Ifi27	123.963	0.206565	0.174867	1.18127	0.237497	0.579115	0.237235	NM_026790	52668	interferon, alpha-inducible protein 27 [Source:MGI Symbol;Acc:MGI:1277180]	52668	12	103400470	103406498	q	1
NM_013673.3	Sp100	282.478	0.154058	0.130449	1.18098	0.237612	0.579115	0.237235	NM_013673	20684	nuclear antigen Sp100 [Source:MGI Symbol;Acc:MGI:109561]	20684	1	85577709	85637719	q	1
NM_001171187.1	Mal	11957.8	-0.250208	0.17758	-1.40898	0.15884	0.580878	0.235915	NM_001171187	17153	myelin and lymphocyte protein, T cell differentiation protein [Source:MGI Symbol;Acc:MGI:892970]	17153	2	127475146	127498615	q	-1
NM_028679.4	Irak3	132.505	-0.25685	0.218428	-1.1759	0.239634	0.581525	0.235431	NM_028679	73914	interleukin-1 receptor-associated kinase 3 [Source:MGI Symbol;Acc:MGI:1921164]	73914	10	119977553	120038035	q	-1
NM_145830.1	Ehmt2	5456.14	-0.153024	0.109263	-1.40051	0.161362	0.587263	0.231167	NM_145830	110147	euchromatic histone lysine N-methyltransferase 2 [Source:MGI Symbol;Acc:MGI:2148922]	110147	17	35117445	35133028	q	1
NM_207625.2	Acsl4	3531.66	0.18568	0.159119	1.16693	0.243239	0.587558	0.230949	NM_207625	50790	acyl-CoA synthetase long-chain family member 4 [Source:MGI Symbol;Acc:MGI:1354713]	50790	X	141100989	141173531	q	-1
NM_007425.2	Ager	36.7277	-0.27269	0.236857	-1.15129	0.249614	0.587558	0.230949	NM_007425	11596	advanced glycosylation end product-specific receptor [Source:MGI Symbol;Acc:MGI:893592]	11596	17	34816836	34819910	q	1
NM_008486.2	Anpep	102.095	-0.173084	0.150878	-1.14717	0.25131	0.587558	0.230949	NM_008486	16790	alanyl aminopeptidase, membrane [Source:MGI Symbol;Acc:MGI:5000466]	16790	7	79471551	79510807	q	-1
NM_026887.2	Ap1s2	3227.65	-0.271056	0.235353	-1.1517	0.249444	0.587558	0.230949	NM_026887	108012	adaptor-related protein complex 1, sigma 2 subunit [Source:MGI Symbol;Acc:MGI:1889383]	108012	X	162692013	162716662	q	1
NM_028835.1	Atg7	686.109	0.168838	0.146074	1.15584	0.247746	0.587558	0.230949	NM_028835	74244	autophagy related 7 [Source:MGI Symbol;Acc:MGI:1921494]	74244	6	114620058	114837575	q	1
NM_001110498.1	Ifnar2	725.738	0.106183	0.0925999	1.14668	0.251512	0.587558	0.230949	NM_001110498	15976	interferon (alpha and beta) receptor 2 [Source:MGI Symbol;Acc:MGI:1098243]	15976	16	91169671	91202477	q	1
NM_016791.4	Nfatc1	86.0263	0.206221	0.178453	1.15561	0.247842	0.587558	0.230949	NM_016791	18018	nuclear factor of activated T cells, cytoplasmic, calcineurin dependent 1 [Source:MGI Symbol;Acc:MGI:102469]	18018	18	80649420	80756286	q	-1
NM_145827.3	Nlrp3	42.6179	0.31503	0.274588	1.14728	0.251266	0.587558	0.230949	NM_145827	216799	NLR family, pyrin domain containing 3 [Source:MGI Symbol;Acc:MGI:2653833]	216799	11	59432394	59457782	q	1
NM_001271599.1	Sort1	7405.33	-0.115995	0.100096	-1.15884	0.246521	0.587558	0.230949	NM_001271599	20661	sortilin 1 [Source:MGI Symbol;Acc:MGI:1338015]	20661	3	108191398	108268827	q	1
NM_172599.4	Atg14	768.192	-0.167347	0.122168	-1.3698	0.170748	0.588981	0.229899	NM_172599	100504663	autophagy related 14 [Source:MGI Symbol;Acc:MGI:1261775]	100504663	14	47778350	47808106	q	-1
NM_009942.2	Cox5b	27993.5	-0.116192	0.0854793	-1.3593	0.174051	0.588981	0.229899	NM_009942	12859	cytochrome c oxidase subunit 5B [Source:MGI Symbol;Acc:MGI:88475]	12859	1	36730530	36732762	q	1
NM_001252433.1	Dlg1	2719.73	-0.301583	0.219565	-1.37355	0.169582	0.588981	0.229899	NM_001252433	13383	discs large MAGUK scaffold protein 1 [Source:MGI Symbol;Acc:MGI:107231]	13383	16	31482261	31693947	q	1
NM_010128.4	Emp1	64.1607	0.285169	0.205548	1.38736	0.165332	0.588981	0.229899	NM_010128	13730	epithelial membrane protein 1 [Source:MGI Symbol;Acc:MGI:107941]	13730	6	135339543	135360171	q	1
NM_178086.3	Fa2h	1437.88	-0.178273	0.130205	-1.36918	0.170944	0.588981	0.229899	NM_178086	338521	fatty acid 2-hydroxylase [Source:MGI Symbol;Acc:MGI:2443327]	338521	8	112071767	112120456	q	-1
NM_016851.2	Irf6	32.2908	-0.37769	0.277108	-1.36297	0.172891	0.588981	0.229899	NM_016851	54139	interferon regulatory factor 6 [Source:MGI Symbol;Acc:MGI:1859211]	54139	1	192835419	192854331	q	1
NM_144787.1	Kdm4c	811.665	-0.154761	0.113591	-1.36245	0.173057	0.588981	0.229899	NM_144787	76804	lysine (K)-specific demethylase 4C [Source:MGI Symbol;Acc:MGI:1924054]	76804	4	74160734	74324097	q	1
NM_001163184.1	Plekhb1	28418	-0.197947	0.143077	-1.3835	0.166511	0.588981	0.229899	NM_001163184	27276	pleckstrin homology domain containing, family B (evectins) member 1 [Source:MGI Symbol;Acc:MGI:1351469]	27276	7	100292099	100311621	q	-1
NM_009012.2	Rad50	187.112	-0.189698	0.137891	-1.37571	0.168911	0.588981	0.229899	NM_009012	19360	RAD50 double strand break repair protein [Source:MGI Symbol;Acc:MGI:109292]	19360	11	53540346	53598146	q	-1
NM_016802.4	Rhoa	5201.06	-0.0978889	0.0706712	-1.38513	0.166012	0.588981	0.229899	NM_016802	11848	ras homolog family member A [Source:MGI Symbol;Acc:MGI:1096342]	11848	9	108183328	108215133	q	1
NM_010101.3	S1pr3	237.085	0.21393	0.155956	1.37173	0.170148	0.588981	0.229899	NM_010101	13610	sphingosine-1-phosphate receptor 3 [Source:MGI Symbol;Acc:MGI:1339365]	13610	13	51562675	51576833	q	1
NM_022724.4	Suv39h2	199.455	-0.187203	0.137794	-1.35857	0.174282	0.588981	0.229899	NM_022724	64707	suppressor of variegation 3-9 2 [Source:MGI Symbol;Acc:MGI:1890396]	64707	2	3456852	3476068	q	-1
NM_001033394.3	Tmem88b	2103.44	-0.20928	0.153243	-1.36567	0.172042	0.588981	0.229899	NM_001033394	320587	transmembrane protein 88B [Source:MGI Symbol;Acc:MGI:2444329]	320587	4	155866048	155870331	q	-1
NM_011623.2	Top2a	112.976	0.497808	0.365375	1.36246	0.173053	0.588981	0.229899	NM_011623	21973	topoisomerase (DNA) II alpha [Source:MGI Symbol;Acc:MGI:98790]	21973	11	98883769	98915015	q	-1
NM_080848.2	Wdr5	514.379	-0.129815	0.0949112	-1.36776	0.171388	0.588981	0.229899	NM_080848	140858	WD repeat domain 5 [Source:MGI Symbol;Acc:MGI:2155884]	140858	2	27405169	27426547	q	1
NM_001172117.1	Hck	78.222	0.191088	0.167752	1.13911	0.254658	0.590009	0.229141	NM_001172117	15162	hemopoietic cell kinase [Source:MGI Symbol;Acc:MGI:96052]	15162	2	152950388	152993361	q	1
NM_145837.3	Il17d	92.27	-0.20323	0.178202	-1.14045	0.254099	0.590009	0.229141	NM_145837	239114	interleukin 17D [Source:MGI Symbol;Acc:MGI:2446510]	239114	14	57762234	57780623	q	1
NM_001284410.1	Bcl2l11	88.2972	0.345466	0.255017	1.35468	0.175521	0.59053	0.228758	NM_001284410	12125	BCL2 like 11 [Source:MGI Symbol;Acc:MGI:1197519]	12125	2	127967958	128004467	q	1
NM_007970.1	Ezh1	688.902	-0.145804	0.107901	-1.35128	0.176606	0.591553	0.228006	NM_007970	14055	enhancer of zeste 1 polycomb repressive complex 2 subunit [Source:MGI Symbol;Acc:MGI:1097695]	14055	11	101081941	101117289	q	-1
NM_001029837.2	Pik3cd	846.648	0.293795	0.259065	1.13406	0.25677	0.592287	0.227467	NM_001029837	18707	phosphatidylinositol-4,5-bisphosphate 3-kinase catalytic subunit delta [Source:MGI Symbol;Acc:MGI:1098211]	18707	4	149733625	149787028	q	-1
NM_011198.3	Ptgs2	55.6517	-0.338751	0.299319	-1.13174	0.257745	0.592287	0.227467	NM_011198	19225	prostaglandin-endoperoxide synthase 2 [Source:MGI Symbol;Acc:MGI:97798]	19225	1	149975782	149983978	q	1
NM_153564.2	Gbp5	147.222	0.24171	0.214522	1.12674	0.259852	0.594702	0.225701	NM_153564	229898	guanylate binding protein 5 [Source:MGI Symbol;Acc:MGI:2429943]	229898	3	142199739	142228105	q	1
NM_013563.3	Il2rg	59.7378	0.275785	0.245511	1.12331	0.261305	0.594851	0.225592	NM_013563	16186	interleukin 2 receptor, gamma chain [Source:MGI Symbol;Acc:MGI:96551]	16186	X	100307984	100311861	q	-1
NM_011246.2	Rasgrp1	18509.2	-0.153503	0.13686	-1.1216	0.26203	0.594851	0.225592	NM_011246	19419	RAS guanyl releasing protein 1 [Source:MGI Symbol;Acc:MGI:1314635]	19419	2	117110474	117173482	q	-1
NM_001112698.1	Ngf	221.462	0.577193	0.430187	1.34173	0.179684	0.596114	0.224671	NM_001112698	18049	nerve growth factor [Source:MGI Symbol;Acc:MGI:97321]	18049	3	102377235	102428329	q	1
NM_021419.2	Rnf8	842.228	-0.129832	0.0967989	-1.34126	0.179837	0.596114	0.224671	NM_021419	58230	ring finger protein 8 [Source:MGI Symbol;Acc:MGI:1929069]	58230	17	29833764	29863965	q	1
NM_011593.2	Timp1	23.7034	0.406171	0.30372	1.33732	0.181118	0.596114	0.224671	NM_011593	21857	tissue inhibitor of metalloproteinase 1 [Source:MGI Symbol;Acc:MGI:98752]	21857	X	20736405	20740974	q	1
NM_001161746.1	Tnfrsf12a	610.873	0.469812	0.350687	1.33969	0.180346	0.596114	0.224671	NM_001161746	27279	tumor necrosis factor receptor superfamily, member 12a [Source:MGI Symbol;Acc:MGI:1351484]	27279	17	23894419	23896442	q	-1
NM_010581.3	Cd47	8427.59	-0.0854864	0.0642572	-1.33038	0.183393	0.597678	0.223533	NM_010581	16423	CD47 antigen (Rh-related antigen, integrin-associated signal transducer) [Source:MGI Symbol;Acc:MGI:96617]	16423	16	49620896	49735373	q	1
NM_010053.1	Dlx1	368.919	0.27503	0.206452	1.33218	0.182802	0.597678	0.223533	NM_010053	13390	distal-less homeobox 1 [Source:MGI Symbol;Acc:MGI:94901]	13390	2	71358457	71364325	q	1
NM_144818.3	Ncaph	78.7844	0.230812	0.174031	1.32627	0.184751	0.597678	0.223533	NM_144818	215387	non-SMC condensin I complex, subunit H [Source:MGI Symbol;Acc:MGI:2444777]	215387	2	126945729	126975874	q	-1
NM_001024955.1	Pik3r1	2359.45	-0.097092	0.0730974	-1.32826	0.184094	0.597678	0.223533	NM_001024955	18708	phosphoinositide-3-kinase regulatory subunit 1 [Source:MGI Symbol;Acc:MGI:97583]	18708	13	101817071	101904725	q	-1
NM_011508.1	Eif1	12736.1	-0.10726	0.0818269	-1.31082	0.18992	0.606623	0.217081	NM_011508	20918	eukaryotic translation initiation factor 1 [Source:MGI Symbol;Acc:MGI:105125]	20918	11	100210711	100212922	q	1
NM_010773.2	Mbd2	4918.61	-0.134759	0.102633	-1.31302	0.189177	0.606623	0.217081	NM_010773	17191	methyl-CpG binding domain protein 2 [Source:MGI Symbol;Acc:MGI:1333813]	17191	18	70701260	70759202	q	1
NM_001304721.1	Entpd1	530.101	-0.165484	0.149876	-1.10414	0.269534	0.608107	0.21602	NM_001304721	12495	ectonucleoside triphosphate diphosphohydrolase 1 [Source:MGI Symbol;Acc:MGI:102805]	12495	19	40600810	40730046	q	1
NM_011947.3	Map3k3	732.447	-0.0982158	0.0890447	-1.10299	0.27003	0.608107	0.21602	NM_011947	26406	mitogen-activated protein kinase kinase kinase 3 [Source:MGI Symbol;Acc:MGI:1346874]	26406	11	105975439	106046272	q	1
NM_013822.2	Jag1	250.494	-0.139935	0.107383	-1.30314	0.192526	0.609799	0.214813	NM_013822	16449	jagged 1 [Source:MGI Symbol;Acc:MGI:1095416]	16449	2	136923376	136958564	q	-1
NM_001039484.1	Kcnj10	6312.15	0.29841	0.228822	1.30412	0.192194	0.609799	0.214813	NM_001039484	16513	potassium inwardly-rectifying channel, subfamily J, member 10 [Source:MGI Symbol;Acc:MGI:1194504]	16513	1	172168777	172201652	q	1
NM_010699.2	Ldha	5327.05	-0.239784	0.185807	-1.2905	0.196877	0.613776	0.21199	NM_010699	16828	lactate dehydrogenase A [Source:MGI Symbol;Acc:MGI:96759]	16828	7	46490899	46505051	q	1
NM_001040691.1	Ung	119.472	-0.203191	0.156739	-1.29637	0.194849	0.613776	0.21199	NM_001040691	22256	uracil DNA glycosylase [Source:MGI Symbol;Acc:MGI:109352]	22256	5	114268447	114277384	q	1
NM_009687.2	Apex1	772.007	-0.0888206	0.0821892	-1.08068	0.279838	0.615424	0.210825	NM_009687	11792	apurinic/apyrimidinic endonuclease 1 [Source:MGI Symbol;Acc:MGI:88042]	11792	14	51162425	51164596	q	1
NM_007598.5	Cap1	9791.29	-0.213321	0.197355	-1.0809	0.279741	0.615424	0.210825	NM_007598	12331	cyclase associated actin cytoskeleton regulatory protein 1 [Source:MGI Symbol;Acc:MGI:88262]	12331	4	122752840	122779849	q	-1
NM_010560.2	Il6st	1290.09	0.102936	0.0947811	1.08604	0.27746	0.615424	0.210825	NM_010560	16195	interleukin 6 signal transducer [Source:MGI Symbol;Acc:MGI:96560]	16195	13	112600604	112646620	q	1
NM_011949.3	Mapk1	10647.8	-0.189488	0.173497	-1.09217	0.274758	0.615424	0.210825	NM_011949	26413	mitogen-activated protein kinase 1 [Source:MGI Symbol;Acc:MGI:1346858]	26413	16	16801246	16865317	q	1
NM_033622.1	Tnfsf13b	64.6076	0.338212	0.31159	1.08544	0.277727	0.615424	0.210825	NM_033622	24099	tumor necrosis factor (ligand) superfamily, member 13b [Source:MGI Symbol;Acc:MGI:1344376]	24099	8	10056467	10089072	q	1
NM_011693.2	Vcam1	357.58	0.118234	0.108853	1.08618	0.277399	0.615424	0.210825	NM_011693	22329	vascular cell adhesion molecule 1 [Source:MGI Symbol;Acc:MGI:98926]	22329	3	115903598	115923337	q	-1
NM_010295.2	Gclc	1825.54	-0.102628	0.0798801	-1.28478	0.198871	0.616989	0.209723	NM_010295	14629	glutamate-cysteine ligase, catalytic subunit [Source:MGI Symbol;Acc:MGI:104990]	14629	9	77661817	77701767	q	1
NM_011951.3	Mapk14	2419.1	-0.0951428	0.0884406	-1.07578	0.282025	0.617821	0.209137	NM_011951	26416	mitogen-activated protein kinase 14 [Source:MGI Symbol;Acc:MGI:1346865]	26416	17	28910303	28967380	q	1
NM_001110204.1	Acvr1	639.028	-0.12885	0.120308	-1.071	0.284168	0.618269	0.208822	NM_001110204	11477	activin A receptor, type 1 [Source:MGI Symbol;Acc:MGI:87911]	11477	2	58278656	58457169	q	-1
NM_008518.2	Ltb	27.7313	-0.294886	0.275483	-1.07043	0.284426	0.618269	0.208822	NM_008518	16994	lymphotoxin B [Source:MGI Symbol;Acc:MGI:104796]	16994	17	35413415	35415296	q	1
NM_007840.3	Ddx5	22957	-0.111346	0.104522	-1.06529	0.286746	0.618536	0.208635	NM_007840	13207	DEAD box helicase 5 [Source:MGI Symbol;Acc:MGI:105037]	13207	11	106671181	106680011	q	-1
NM_011488.2	Stat5a	93.7656	0.170628	0.160003	1.06641	0.28624	0.618536	0.208635	NM_011488	20850	signal transducer and activator of transcription 5A [Source:MGI Symbol;Acc:MGI:103036]	20850	11	100750177	100775995	q	1
NM_013560.2	Hspb1	499.067	0.183386	0.173544	1.05671	0.290643	0.624551	0.204432	NM_013560	15507	heat shock protein 1 [Source:MGI Symbol;Acc:MGI:96240]	15507	5	135916773	135918417	q	1
NM_010238.3	Brd2	3444.67	-0.0785165	0.0617265	-1.27201	0.203371	0.625821	0.20355	NM_010238	14312	bromodomain containing 2 [Source:MGI Symbol;Acc:MGI:99495]	14312	17	34330997	34341608	q	-1
NM_008960.2	Pten	5333.31	-0.0935552	0.0734584	-1.27358	0.202812	0.625821	0.20355	NM_008960	19211	phosphatase and tensin homolog [Source:MGI Symbol;Acc:MGI:109583]	19211	19	32734897	32803560	q	1
NM_001136222.1	Acsl3	10503.1	0.0763585	0.0731454	1.04393	0.296519	0.627594	0.202321	NM_001136222	74205	acyl-CoA synthetase long-chain family member 3 [Source:MGI Symbol;Acc:MGI:1921455]	74205	1	78635542	78685460	q	1
NM_010553.2	Il18rap	36.0941	-0.335195	0.32079	-1.0449	0.296068	0.627594	0.202321	NM_010553	16174	interleukin 18 receptor accessory protein [Source:MGI Symbol;Acc:MGI:1338888]	16174	1	40554522	40590865	q	1
NM_008943.2	Psen1	1305.76	-0.110972	0.105991	-1.047	0.295098	0.627594	0.202321	NM_008943	NA	NA	NA	NA	NA	NA	NA	NA
NM_011401.4	Slc2a3	2293.91	-0.104837	0.100196	-1.04632	0.295415	0.627594	0.202321	NM_011401	20527	solute carrier family 2 (facilitated glucose transporter), member 3 [Source:MGI Symbol;Acc:MGI:95757]	20527	6	122704768	122778599	q	-1
NM_023138.5	Map2k2	2173.66	-0.0589923	0.0569306	-1.03621	0.300102	0.6328	0.198734	NM_023138	26396	mitogen-activated protein kinase kinase 2 [Source:MGI Symbol;Acc:MGI:1346867]	26396	10	80941749	80969809	q	1
NM_181850.2	Grm3	6538.85	-0.225207	0.178505	-1.26163	0.207081	0.634657	0.197461	NM_181850	108069	glutamate receptor, metabotropic 3 [Source:MGI Symbol;Acc:MGI:1351340]	108069	5	9535541	9775170	q	-1
NM_026121.3	Bag4	1842.92	-0.140131	0.111434	-1.25752	0.208566	0.636629	0.196113	NM_026121	67384	BCL2-associated athanogene 4 [Source:MGI Symbol;Acc:MGI:1914634]	67384	8	26254566	26275315	q	-1
NM_008170.2	Grin2a	579.473	-0.188746	0.150921	-1.25063	0.211071	0.637149	0.195759	NM_008170	14811	glutamate receptor, ionotropic, NMDA2A (epsilon 1) [Source:MGI Symbol;Acc:MGI:95820]	14811	16	9385762	9813424	q	-1
NM_019641.3	Stmn1	19560.5	0.199378	0.159342	1.25126	0.210841	0.637149	0.195759	NM_019641	16765	stathmin 1 [Source:MGI Symbol;Acc:MGI:96739]	16765	4	134195631	134201154	q	1
NM_138667.2	Tab2	1817	0.0675562	0.0656741	1.02866	0.303641	0.637872	0.195267	NM_138667	68652	TGF-beta activated kinase 1/MAP3K7 binding protein 2 [Source:MGI Symbol;Acc:MGI:1915902]	68652	10	7781417	7831994	q	-1
NM_011035.2	Pak1	8926.69	0.187024	0.182462	1.025	0.305362	0.639104	0.194428	NM_011035	18479	p21 (RAC1) activated kinase 1 [Source:MGI Symbol;Acc:MGI:1339975]	18479	7	97437748	97561588	q	1
NM_144870.5	Ndufs8	5889.61	-0.0875289	0.0867099	-1.00945	0.312761	0.650699	0.18662	NM_144870	225887	NADH:ubiquinone oxidoreductase core subunit S8 [Source:MGI Symbol;Acc:MGI:2385079]	225887	19	3958863	3962774	q	-1
NM_009906.5	Tpp1	618.065	0.0914297	0.090659	1.0085	0.313214	0.650699	0.18662	NM_009906	12751	tripeptidyl peptidase I [Source:MGI Symbol;Acc:MGI:1336194]	12751	7	105394018	105401442	q	-1
NM_080638.2	Mvp	256.453	-0.146946	0.146118	-1.00566	0.314577	0.651129	0.186333	NM_080638	78388	major vault protein [Source:MGI Symbol;Acc:MGI:1925638]	78388	7	126586032	126613793	q	-1
NM_029415.2	Slc10a6	23.0185	-0.40275	0.32785	-1.22846	0.219275	0.658694	0.181316	NM_029415	75750	solute carrier family 10 (sodium/bile acid cotransporter family), member 6 [Source:MGI Symbol;Acc:MGI:1923000]	75750	5	103753577	103777269	q	-1
NM_178114.4	Amigo2	456.7	0.270883	0.221946	1.22049	0.22228	0.662625	0.178732	NM_178114	105827	adhesion molecule with Ig like domain 2 [Source:MGI Symbol;Acc:MGI:2145995]	105827	15	97142006	97145168	q	-1
NM_007525.3	Bard1	86.9978	-0.235211	0.194548	-1.20901	0.226659	0.662625	0.178732	NM_007525	12021	BRCA1 associated RING domain 1 [Source:MGI Symbol;Acc:MGI:1328361]	12021	1	71066657	71142305	q	-1
NM_139294.5	Braf	4314.52	-0.0904866	0.0747165	-1.21106	0.225871	0.662625	0.178732	NM_139294	109880	Braf transforming gene [Source:MGI Symbol;Acc:MGI:88190]	109880	6	39580171	39702397	q	-1
NM_007949.4	Ercc2	973.054	0.117416	0.0964066	1.21792	0.223253	0.662625	0.178732	NM_007949	13871	excision repair cross-complementing rodent repair deficiency, complementation group 2 [Source:MGI Symbol;Acc:MGI:95413]	13871	7	19115935	19129619	q	1
NM_001110350.1	Sin3a	1192.9	-0.130472	0.107547	-1.21316	0.225068	0.662625	0.178732	NM_001110350	20466	transcriptional regulator, SIN3A (yeast) [Source:MGI Symbol;Acc:MGI:107157]	20466	9	56979324	57035650	q	1
NM_013681.1	Syn2	6452.83	0.159395	0.131754	1.2098	0.226357	0.662625	0.178732	NM_013681	20965	synapsin II [Source:MGI Symbol;Acc:MGI:103020]	20965	6	115111863	115258967	q	1
NM_027406.1	Aldh1l1	1389.11	0.0912424	0.0761191	1.19868	0.230653	0.66866	0.174795	NM_027406	107747	aldehyde dehydrogenase 1 family, member L1 [Source:MGI Symbol;Acc:MGI:1340024]	107747	6	90463409	90577185	q	1
NM_007540.4	Bdnf	138.122	0.553701	0.463568	1.19443	0.232309	0.66866	0.174795	NM_007540	12064	brain derived neurotrophic factor [Source:MGI Symbol;Acc:MGI:88145]	12064	2	109505045	109557352	q	1
NM_010066.3	Dnmt1	344.116	0.156536	0.132405	1.18225	0.237106	0.676596	0.16967	NM_010066	13433	DNA methyltransferase 1 [Source:MGI Symbol;Acc:MGI:94912]	13433	9	20818505	20871184	q	-1
NM_008598.2	Mgmt	78.061	0.224757	0.191913	1.17114	0.241543	0.676596	0.16967	NM_008598	17314	O-6-methylguanine-DNA methyltransferase [Source:MGI Symbol;Acc:MGI:96977]	17314	7	136496343	136731995	q	1
NM_010822.3	Mpg	91.6566	-0.223771	0.190449	-1.17497	0.240008	0.676596	0.16967	NM_010822	268395	N-methylpurine-DNA glycosylase [Source:MGI Symbol;Acc:MGI:97073]	268395	11	32176505	32182700	q	1
NM_008706.5	Nqo1	281.681	-0.13979	0.118726	-1.17742	0.239028	0.676596	0.16967	NM_008706	18104	NAD(P)H dehydrogenase, quinone 1 [Source:MGI Symbol;Acc:MGI:103187]	18104	8	108114857	108129838	q	-1
NM_009081.2	Rpl28	12774.2	-0.106853	0.091365	-1.16952	0.242194	0.676596	0.16967	NM_009081	19943	ribosomal protein L28 [Source:MGI Symbol;Acc:MGI:101839]	19943	7	4795873	4798065	q	1
NM_027384.1	Tet1	792.152	-0.110247	0.0942709	-1.16947	0.242216	0.676596	0.16967	NM_027384	NA	NA	NA	NA	NA	NA	NA	NA
NM_031199.2	Tgfa	1974.74	-0.331898	0.281188	-1.18034	0.237864	0.676596	0.16967	NM_031199	21802	transforming growth factor alpha [Source:MGI Symbol;Acc:MGI:98724]	21802	6	86172205	86252701	q	1
NM_008492.2	Ldhb	28108.7	-0.11487	0.117997	-0.973499	0.330306	0.676665	0.169626	NM_008492	16832	lactate dehydrogenase B [Source:MGI Symbol;Acc:MGI:96763]	16832	6	142435975	142453683	q	-1
NM_010798.3	Mif	5455.07	-0.0609151	0.0629032	-0.968394	0.332848	0.676665	0.169626	NM_010798	17319	macrophage migration inhibitory factor (glycosylation-inhibiting factor) [Source:MGI Symbol;Acc:MGI:96982]	17319	10	75695187	75696074	q	-1
NM_028261.1	Sting1	153.52	0.186487	0.193084	0.965837	0.334126	0.676665	0.169626	NM_028261	72512	stimulator of interferon response cGAMP interactor 1 [Source:MGI Symbol;Acc:MGI:1919762]	72512	18	35866732	35873607	q	-1
NM_011602.5	Tln1	1001.98	0.113464	0.11631	0.975538	0.329293	0.676665	0.169626	NM_011602	21894	talin 1 [Source:MGI Symbol;Acc:MGI:1099832]	21894	4	43531519	43562691	q	-1
NM_126166.2	Tlr3	433.951	0.114207	0.118212	0.966122	0.333983	0.676665	0.169626	NM_126166	142980	toll-like receptor 3 [Source:MGI Symbol;Acc:MGI:2156367]	142980	8	45848702	45864117	q	-1
NM_080560.3	Ube2n	7695.79	-0.0743506	0.0766401	-0.970127	0.331983	0.676665	0.169626	NM_080560	93765	ubiquitin-conjugating enzyme E2N [Source:MGI Symbol;Acc:MGI:1934835]	93765	10	95351007	95381519	q	1
NM_176940.5	Nwd1	1025.56	0.118193	0.101263	1.16718	0.243136	0.676668	0.169624	NM_176940	319555	NACHT and WD repeat domain containing 1 [Source:MGI Symbol;Acc:MGI:2442268]	319555	8	73373339	73444504	q	1
NM_001177691.1	Gal3st1	506.894	-0.148445	0.128214	-1.15779	0.246951	0.68227	0.166044	NM_001177691	53897	galactose-3-O-sulfotransferase 1 [Source:MGI Symbol;Acc:MGI:1858277]	53897	11	3933636	3949326	q	1
XR_377436.1	Kdm5a	1798.53	-0.131179	0.113282	-1.15799	0.246869	0.68227	0.166044	XR_377436	NA	NA	NA	NA	NA	NA	NA	NA
NM_026880.2	Pink1	13891.3	-0.0923052	0.0800485	-1.15312	0.248863	0.68257	0.165853	NM_026880	68943	PTEN induced putative kinase 1 [Source:MGI Symbol;Acc:MGI:1916193]	68943	4	138040720	138053618	q	-1
NM_009284.2	Stat6	77.9933	-0.187349	0.1959	-0.956351	0.338895	0.683863	0.165031	NM_009284	20852	signal transducer and activator of transcription 6 [Source:MGI Symbol;Acc:MGI:103034]	20852	10	127478855	127496826	q	1
NM_009883.4	Cebpb	383.634	0.0963403	0.101256	0.951457	0.341372	0.68396	0.16497	NM_009883	12608	CCAAT/enhancer binding protein beta [Source:MGI Symbol;Acc:MGI:88373]	12608	2	167530835	167532338	q	1
NM_029780.3	Raf1	2008.52	-0.0584539	0.0613423	-0.952914	0.340634	0.68396	0.16497	NM_029780	110157	v-raf-leukemia viral oncogene 1 [Source:MGI Symbol;Acc:MGI:97847]	110157	6	115595028	115653596	q	-1
NM_001190449.1	Ddah2	155.719	0.126438	0.134178	0.942319	0.34603	0.688391	0.162165	NM_001190449	51793	DDAH family member 2, ADMA independent [Source:MGI Symbol;Acc:MGI:1859016]	51793	17	35278011	35281071	q	1
NM_013842.2	Xbp1	1738.06	-0.0958762	0.101649	-0.943209	0.345574	0.688391	0.162165	NM_013842	22433	X-box binding protein 1 [Source:MGI Symbol;Acc:MGI:98970]	22433	11	5470659	5475893	q	1
NM_053207.2	Egln1	2502.35	-0.0914043	0.0976965	-0.935594	0.349482	0.689603	0.161401	NM_053207	112405	egl-9 family hypoxia-inducible factor 1 [Source:MGI Symbol;Acc:MGI:1932286]	112405	8	125635326	125676063	q	-1
NM_008551.2	Mapkapk2	924.914	0.145339	0.155612	0.933982	0.350313	0.689603	0.161401	NM_008551	17164	MAP kinase-activated protein kinase 2 [Source:MGI Symbol;Acc:MGI:109298]	17164	1	130981437	131025563	q	-1
NM_008540.2	Smad4	2679.84	-0.142244	0.151733	-0.937462	0.348521	0.689603	0.161401	NM_008540	17128	SMAD family member 4 [Source:MGI Symbol;Acc:MGI:894293]	17128	18	73772080	73836851	q	-1
NM_010554.4	Il1a	40.172	0.216466	0.234301	0.92388	0.355549	0.693129	0.159186	NM_010554	16175	interleukin 1 alpha [Source:MGI Symbol;Acc:MGI:96542]	16175	2	129141530	129151892	q	-1
NM_010937.2	Nras	1233.73	0.0648145	0.070191	0.923402	0.355798	0.693129	0.159186	NM_010937	18176	neuroblastoma ras oncogene [Source:MGI Symbol;Acc:MGI:97376]	18176	3	102965601	102975230	q	1
NM_024221.3	Pdhb	5377.78	-0.0865341	0.0932971	-0.927511	0.353661	0.693129	0.159186	NM_024221	68263	pyruvate dehydrogenase (lipoamide) beta [Source:MGI Symbol;Acc:MGI:1915513]	68263	14	14296748	14303777	q	1
NM_001164724.1	Il33	2826.53	-0.117241	0.127402	-0.920242	0.357447	0.693939	0.158678	NM_001164724	77125	interleukin 33 [Source:MGI Symbol;Acc:MGI:1924375]	77125	19	29902514	29938118	q	1
NM_019584.4	Becn1	1850.56	-0.0553375	0.0604965	-0.914723	0.360337	0.696272	0.157221	NM_019584	56208	beclin 1, autophagy related [Source:MGI Symbol;Acc:MGI:1891828]	56208	11	101176778	101193112	q	-1
NM_001037177.1	Nfatc2	710.609	-0.154947	0.169669	-0.91323	0.361122	0.696272	0.157221	NM_001037177	18019	nuclear factor of activated T cells, cytoplasmic, calcineurin dependent 2 [Source:MGI Symbol;Acc:MGI:102463]	18019	2	168318330	168443577	q	-1
NM_001113530.1	Csf1	1181.21	0.13351	0.150544	0.886852	0.375159	0.699788	0.155033	NM_001113530	12977	colony stimulating factor 1 (macrophage) [Source:MGI Symbol;Acc:MGI:1339753]	12977	3	107648364	107667785	q	-1
NM_007976.2	F5	28.1067	-0.253023	0.286925	-0.881845	0.377861	0.699788	0.155033	NM_007976	14067	coagulation factor V [Source:MGI Symbol;Acc:MGI:88382]	14067	1	163979407	164047846	q	1
NM_010386.3	H2-DMa	514.627	-0.165792	0.186254	-0.890139	0.373391	0.699788	0.155033	NM_010386	14998	histocompatibility 2, class II, locus DMa [Source:MGI Symbol;Acc:MGI:95921]	14998	17	34338515	34358075	q	1
NM_178590.2	Ikbkg	468.295	0.0741877	0.0830232	0.893578	0.371547	0.699788	0.155033	NM_178590	16151	inhibitor of kappaB kinase gamma [Source:MGI Symbol;Acc:MGI:1338074]	16151	X	73436896	73497460	q	1
NM_019980.2	Litaf	891.96	-0.121093	0.13526	-0.895263	0.370646	0.699788	0.155033	NM_019980	56722	LPS-induced TN factor [Source:MGI Symbol;Acc:MGI:1929512]	56722	16	10777139	10884021	q	-1
NM_008538.2	Marcks	742.033	0.155457	0.175561	0.885484	0.375895	0.699788	0.155033	NM_008538	17118	myristoylated alanine rich protein kinase C substrate [Source:MGI Symbol;Acc:MGI:96907]	17118	10	37009371	37014916	q	-1
NM_024456.5	Rab5c	1721.79	-0.0899455	0.0996971	-0.902188	0.366957	0.699788	0.155033	NM_024456	19345	RAB5C, member RAS oncogene family [Source:MGI Symbol;Acc:MGI:105306]	19345	11	100605835	100629041	q	-1
NM_001083921.1	Rbck1	1140.14	-0.138967	0.156684	-0.886923	0.37512	0.699788	0.155033	NM_001083921	24105	RanBP-type and C3HC4-type zinc finger containing 1 [Source:MGI Symbol;Acc:MGI:1344372]	24105	2	152158254	152174573	q	-1
NM_013671.3	Sod2	8035.36	-0.0824826	0.0934275	-0.882852	0.377316	0.699788	0.155033	NM_013671	20656	superoxide dismutase 2, mitochondrial [Source:MGI Symbol;Acc:MGI:98352]	20656	17	13225733	13258950	q	1
NM_213659.2	Stat3	1477.66	0.0799551	0.0896615	0.891744	0.37253	0.699788	0.155033	NM_213659	20848	signal transducer and activator of transcription 3 [Source:MGI Symbol;Acc:MGI:103038]	20848	11	100775924	100830366	q	-1
NM_025609.2	Tab1	1196.68	-0.0604839	0.0683488	-0.884931	0.376194	0.699788	0.155033	NM_025609	66513	TGF-beta activated kinase 1/MAP3K7 binding protein 1 [Source:MGI Symbol;Acc:MGI:1913763]	66513	15	80017328	80045908	q	1
NM_023764.3	Tollip	4557.3	0.0904523	0.1006	0.89913	0.368584	0.699788	0.155033	NM_023764	54473	toll interacting protein [Source:MGI Symbol;Acc:MGI:1891808]	54473	7	141428550	141472244	q	-1
NM_009894.3	Cideb	233.41	0.188954	0.166448	1.13521	0.256286	0.700392	0.154659	NM_009894	12684	cell death-inducing DNA fragmentation factor, alpha subunit-like effector B [Source:MGI Symbol;Acc:MGI:1270844]	12684	14	55991507	55995915	q	-1
NM_001271614.1	Fen1	347.644	-0.113633	0.100817	-1.12713	0.259688	0.700573	0.154547	NM_001271614	14156	flap structure specific endonuclease 1 [Source:MGI Symbol;Acc:MGI:102779]	14156	19	10176496	10181533	q	-1
NM_172382.2	Kdm4a	743.015	-0.14566	0.129557	-1.12429	0.260892	0.700573	0.154547	NM_172382	230674	lysine (K)-specific demethylase 4A [Source:MGI Symbol;Acc:MGI:2446210]	230674	4	117994154	118037240	q	-1
NM_011232.2	Rad1	538.8	-0.0936837	0.0831172	-1.12713	0.259689	0.700573	0.154547	NM_011232	19355	RAD1 checkpoint DNA exonuclease [Source:MGI Symbol;Acc:MGI:1316678]	19355	15	10486104	10499149	q	1
NM_011292.2	Rpl9	12694.9	-0.113048	0.100445	-1.12547	0.260389	0.700573	0.154547	NM_011292	20005	ribosomal protein L9 [Source:MGI Symbol;Acc:MGI:1298373]	20005	5	65545707	65548787	q	-1
NM_001276402.1	Lef1	1154.45	0.445243	0.507325	0.877628	0.380145	0.701711	0.153842	NM_001276402	16842	lymphoid enhancer binding factor 1 [Source:MGI Symbol;Acc:MGI:96770]	16842	3	130904120	131018005	q	1
NM_008928.5	Map2k3	155.565	0.117033	0.133874	0.874203	0.382008	0.702845	0.153141	NM_008928	26397	mitogen-activated protein kinase kinase 3 [Source:MGI Symbol;Acc:MGI:1346868]	26397	11	60822859	60843637	q	1
NM_008124.2	Gjb1	1674.01	-0.174656	0.156637	-1.11504	0.264835	0.703445	0.15277	NM_008124	14618	gap junction protein, beta 1 [Source:MGI Symbol;Acc:MGI:95719]	14618	X	100419984	100429235	q	1
NM_013599.2	Mmp9	29.5953	-0.243884	0.281406	-0.866661	0.386128	0.706063	0.151157	NM_013599	17395	matrix metallopeptidase 9 [Source:MGI Symbol;Acc:MGI:97011]	17395	2	164782700	164797770	q	1
NM_009425.2	Tnfsf10	148.125	0.128687	0.148529	0.86641	0.386265	0.706063	0.151157	NM_009425	22035	tumor necrosis factor (ligand) superfamily, member 10 [Source:MGI Symbol;Acc:MGI:107414]	22035	3	27371177	27396576	q	1
NM_021390.3	Sall1	1039.79	0.136833	0.12393	1.10412	0.269543	0.709154	0.149259	NM_021390	58198	spalt like transcription factor 1 [Source:MGI Symbol;Acc:MGI:1889585]	58198	8	89753863	89770790	q	-1
NM_009221.2	Snca	2202.4	-0.2797	0.253597	-1.10293	0.270058	0.709154	0.149259	NM_009221	20617	synuclein, alpha [Source:MGI Symbol;Acc:MGI:1277151]	20617	6	60708559	60806839	q	-1
NM_007691.5	Chek1	94.1282	-0.194459	0.178663	-1.08841	0.276413	0.713026	0.146895	NM_007691	12649	checkpoint kinase 1 [Source:MGI Symbol;Acc:MGI:1202065]	12649	9	36619778	36638361	q	-1
NM_001038695.2	Kdm3a	1424.93	-0.208441	0.190891	-1.09194	0.274861	0.713026	0.146895	NM_001038695	104263	lysine (K)-specific demethylase 3A [Source:MGI Symbol;Acc:MGI:98847]	104263	6	71565956	71609974	q	-1
NM_153520.1	Opalin	4633.82	-0.222491	0.205095	-1.08482	0.278002	0.713026	0.146895	NM_153520	226115	oligodendrocytic myelin paranodal and inner loop protein [Source:MGI Symbol;Acc:MGI:2657025]	226115	19	41050149	41065552	q	-1
NM_177708.4	Rtn4rl1	1341.75	0.27599	0.25458	1.0841	0.278322	0.713026	0.146895	NM_177708	237847	reticulon 4 receptor-like 1 [Source:MGI Symbol;Acc:MGI:2661375]	237847	11	75084609	75158595	q	1
NM_011417.2	Smarca4	3628.25	-0.0736751	0.0675955	-1.08994	0.275739	0.713026	0.146895	NM_011417	20586	SWI/SNF related, matrix associated, actin dependent regulator of chromatin, subfamily a, member 4 [Source:MGI Symbol;Acc:MGI:88192]	20586	9	21527465	21615526	q	1
NM_126165.1	Vps4a	2757.95	-0.0597006	0.0551248	-1.08301	0.278805	0.713026	0.146895	NM_126165	116733	vacuolar protein sorting 4A [Source:MGI Symbol;Acc:MGI:1890520]	116733	8	107757854	107772387	q	1
NM_008229.2	Hdac2	2948.21	-0.089897	0.0838898	-1.07161	0.283896	0.718046	0.143848	NM_008229	15182	histone deacetylase 2 [Source:MGI Symbol;Acc:MGI:1097691]	15182	10	36850540	36877885	q	1
NM_008841.2	Pik3r2	2862.29	-0.0753687	0.0704297	-1.07013	0.284562	0.718046	0.143848	NM_008841	18709	phosphoinositide-3-kinase regulatory subunit 2 [Source:MGI Symbol;Acc:MGI:1098772]	18709	8	71220820	71229357	q	-1
NM_001159633.1	Slc44a1	6070.16	-0.141055	0.132076	-1.06798	0.285529	0.71809	0.143821	NM_001159633	100434	solute carrier family 44, member 1 [Source:MGI Symbol;Acc:MGI:2140592]	100434	4	53440413	53622478	q	1
NM_009689.2	Birc5	30.4647	0.304415	0.286306	1.06325	0.287668	0.721076	0.142019	NM_009689	11799	baculoviral IAP repeat-containing 5 [Source:MGI Symbol;Acc:MGI:1203517]	11799	11	117740077	117746569	q	1
NM_007746.2	Map3k8	137.276	0.149674	0.176331	0.848825	0.395978	0.721314	0.141876	NM_007746	26410	mitogen-activated protein kinase kinase kinase 8 [Source:MGI Symbol;Acc:MGI:1346878]	26410	18	4331327	4353015	q	-1
NM_001081309.1	Pik3r4	1697.98	-0.0744342	0.0879126	-0.846684	0.397171	0.721314	0.141876	NM_001081309	75669	phosphoinositide-3-kinase regulatory subunit 4 [Source:MGI Symbol;Acc:MGI:1922919]	75669	9	105520177	105564856	q	1
NM_133942.2	Plekha1	3800.24	-0.0930078	0.11017	-0.844223	0.398545	0.721482	0.141775	NM_133942	101476	pleckstrin homology domain containing, family A (phosphoinositide binding specific) member 1 [Source:MGI Symbol;Acc:MGI:2442213]	101476	7	130467486	130515042	q	1
NM_001077411.1	Gba	582.62	0.103398	0.123567	0.83677	0.402722	0.725322	0.139469	NM_001077411	14466	glucosylceramidase beta 1 [Source:MGI Symbol;Acc:MGI:95665]	14466	3	89110235	89116273	q	1
NM_177614.3	Os9	2234.58	0.0634144	0.0758687	0.835844	0.403243	0.725322	0.139469	NM_177614	216440	amplified in osteosarcoma [Source:MGI Symbol;Acc:MGI:1924301]	216440	10	126931519	126957000	q	-1
NM_013464.4	Ahr	171.949	-0.115684	0.140403	-0.823942	0.409973	0.73257	0.135151	NM_013464	11622	aryl-hydrocarbon receptor [Source:MGI Symbol;Acc:MGI:105043]	11622	12	35547973	35585037	q	-1
NM_009915.2	Ccr2	32.5425	0.29169	0.354178	0.823569	0.410184	0.73257	0.135151	NM_009915	12772	C-C motif chemokine receptor 2 [Source:MGI Symbol;Acc:MGI:106185]	12772	9	123901987	123913594	q	1
NM_021896.4	Gucy1a1	3214.18	-0.204311	0.248606	-0.821826	0.411176	0.73257	0.135151	NM_021896	60596	guanylate cyclase 1, soluble, alpha 1 [Source:MGI Symbol;Acc:MGI:1926562]	60596	3	81999734	82053096	q	-1
NM_011018.2	Sqstm1	10084.8	-0.0595131	0.0571564	-1.04123	0.297768	0.741482	0.1299	NM_011018	18412	sequestosome 1 [Source:MGI Symbol;Acc:MGI:107931]	18412	11	50090193	50101654	q	-1
NM_007940.3	Ephx2	627.766	-0.174445	0.21809	-0.799875	0.423783	0.745594	0.127498	NM_007940	13850	epoxide hydrolase 2, cytoplasmic [Source:MGI Symbol;Acc:MGI:99500]	13850	14	66321823	66361949	q	-1
NM_010398.3	H2-T23	105.173	0.151248	0.18756	0.806395	0.420015	0.745594	0.127498	NM_010398	15040	histocompatibility 2, T region locus 23 [Source:MGI Symbol;Acc:MGI:95957]	15040	17	36340665	36343747	q	-1
NM_008413.2	Jak2	1896.63	-0.119356	0.148636	-0.803007	0.421971	0.745594	0.127498	NM_008413	16452	Janus kinase 2 [Source:MGI Symbol;Acc:MGI:96629]	16452	19	29229228	29290480	q	1
NM_009424.2	Traf6	797.965	-0.0953384	0.118953	-0.801479	0.422855	0.745594	0.127498	NM_009424	22034	TNF receptor-associated factor 6 [Source:MGI Symbol;Acc:MGI:108072]	22034	2	101508774	101532014	q	1
NM_008503.5	Rps2	12579.4	-0.110815	0.107087	-1.03481	0.300756	0.746468	0.126989	NM_008503	16898	ribosomal protein S2 [Source:MGI Symbol;Acc:MGI:105110]	16898	17	24937090	24940903	q	1
NM_023049.1	Asb2	93.2962	-0.184342	0.179139	-1.02904	0.303459	0.750715	0.124525	NM_023049	65256	ankyrin repeat and SOCS box-containing 2 [Source:MGI Symbol;Acc:MGI:1929743]	65256	12	103287401	103322260	q	-1
NM_001080819.1	Arid1a	1657.56	-0.121935	0.118826	-1.02617	0.304812	0.751604	0.124011	NM_001080819	93760	AT-rich interaction domain 1A [Source:MGI Symbol;Acc:MGI:1935147]	93760	4	133406319	133484080	q	-1
NM_026217.3	Atg12	1821.98	-0.0616849	0.0781639	-0.789174	0.430011	0.751851	0.123868	NM_026217	67526	autophagy related 12 [Source:MGI Symbol;Acc:MGI:1914776]	67526	18	46863211	46874647	q	-1
NM_007609.3	Casp4	36.9687	0.207215	0.26207	0.790683	0.429129	0.751851	0.123868	NM_007609	12363	caspase 4, apoptosis-related cysteine peptidase [Source:MGI Symbol;Acc:MGI:107700]	12363	9	5308828	5336783	q	1
NM_019883.3	Uba52	37627.5	-0.0819937	0.104245	-0.78655	0.431545	0.752198	0.123668	NM_019883	22186	ubiquitin A-52 residue ribosomal protein fusion product 1 [Source:MGI Symbol;Acc:MGI:98887]	22186	8	70960913	70963451	q	-1
NM_007611.2	Casp7	191.04	0.141592	0.138614	1.02148	0.307026	0.754606	0.12228	NM_007611	12369	caspase 7 [Source:MGI Symbol;Acc:MGI:109383]	12369	19	56385561	56430776	q	1
NM_008872.1	Plat	603.588	-0.0861361	0.111121	-0.775154	0.438248	0.756852	0.120989	NM_008872	18791	plasminogen activator, tissue [Source:MGI Symbol;Acc:MGI:97610]	18791	8	23247743	23272860	q	1
NM_001025599.3	Trim26	626.402	0.0786889	0.101353	0.776384	0.437522	0.756852	0.120989	NM_001025599	22670	tripartite motif-containing 26 [Source:MGI Symbol;Acc:MGI:1337056]	22670	17	37148026	37170290	q	1
NM_009469.3	Ulk1	1051.83	0.0945239	0.12141	0.778553	0.436243	0.756852	0.120989	NM_009469	22241	unc-51 like kinase 1 [Source:MGI Symbol;Acc:MGI:1270126]	22241	5	110932354	110957963	q	-1
NM_021704.3	Cxcl12	2103.34	-0.149167	0.193667	-0.770226	0.441166	0.75956	0.119438	NM_021704	20315	C-X-C motif chemokine ligand 12 [Source:MGI Symbol;Acc:MGI:103556]	20315	6	117145496	117158328	q	1
NM_001160353.1	Grm2	553.995	0.73062	0.72032	1.0143	0.31044	0.760214	0.119064	NM_001160353	108068	glutamate receptor, metabotropic 2 [Source:MGI Symbol;Acc:MGI:1351339]	108068	9	106520294	106533281	q	-1
NM_011642.3	Trp73	88.1883	0.394038	0.389187	1.01246	0.311316	0.760214	0.119064	NM_011642	22062	transformation related protein 73 [Source:MGI Symbol;Acc:MGI:1336991]	22062	4	154140706	154224665	q	-1
NM_201373.4	Trim56	179.716	0.103763	0.13525	0.767192	0.442968	0.760338	0.118993	NM_201373	384309	tripartite motif-containing 56 [Source:MGI Symbol;Acc:MGI:2685298]	384309	5	137134498	137145063	q	-1
NM_053177.1	Mcoln1	819.991	0.0720516	0.0942903	0.764146	0.44478	0.761129	0.118542	NM_053177	94178	mucolipin 1 [Source:MGI Symbol;Acc:MGI:1890498]	94178	8	3550457	3565232	q	1
NM_001033161.2	Tradd	115.552	-0.141355	0.140048	-1.00933	0.312815	0.761417	0.118377	NM_001033161	71609	TNFRSF1A-associated via death domain [Source:MGI Symbol;Acc:MGI:109200]	71609	8	105984918	105991241	q	-1
NM_181401.3	Tmem64	1994.58	-0.120329	0.120167	-1.00135	0.31666	0.766121	0.115703	NM_181401	100201	transmembrane protein 64 [Source:MGI Symbol;Acc:MGI:2140359]	100201	4	15265831	15286753	q	1
NM_008423.1	Kcnd1	227.329	-0.117303	0.118074	-0.993474	0.320479	0.76773	0.114792	NM_008423	16506	potassium voltage-gated channel, Shal-related family, member 1 [Source:MGI Symbol;Acc:MGI:96671]	16506	X	7688528	7704519	q	1
NM_019710.2	Smc1a	1540.47	-0.0813679	0.0818836	-0.993702	0.320368	0.76773	0.114792	NM_019710	24061	structural maintenance of chromosomes 1A [Source:MGI Symbol;Acc:MGI:1344345]	24061	X	150799424	150845690	q	1
NM_016846.3	Rgl1	768.69	-0.167231	0.169151	-0.988649	0.322835	0.76977	0.113639	NM_016846	19731	ral guanine nucleotide dissociation stimulator,-like 1 [Source:MGI Symbol;Acc:MGI:107484]	19731	1	152392511	152642102	q	-1
NM_007471.2	App	51823.9	-0.0547913	0.0738564	-0.741863	0.45817	0.769999	0.11351	NM_007471	11820	amyloid beta precursor protein [Source:MGI Symbol;Acc:MGI:88059]	11820	16	84746573	84970654	q	-1
NM_023913.2	Ern1	259.031	0.0922579	0.122597	0.752532	0.451731	0.769999	0.11351	NM_023913	78943	endoplasmic reticulum to nucleus signalling 1 [Source:MGI Symbol;Acc:MGI:1930134]	78943	11	106285476	106378678	q	-1
NM_019777.3	Ikbke	48.0947	0.177739	0.237583	0.748114	0.454391	0.769999	0.11351	NM_019777	56489	inhibitor of kappaB kinase epsilon [Source:MGI Symbol;Acc:MGI:1929612]	56489	1	131182080	131207344	q	-1
NM_023409.4	Npc2	4704.31	0.0753759	0.101319	0.743948	0.456908	0.769999	0.11351	NM_023409	67963	NPC intracellular cholesterol transporter 2 [Source:MGI Symbol;Acc:MGI:1915213]	67963	12	84801336	84819926	q	-1
NM_001355585.1	Pik3r3	2087.26	0.0764419	0.102031	0.749206	0.453733	0.769999	0.11351	NM_001355585	18710	phosphoinositide-3-kinase regulatory subunit 3 [Source:MGI Symbol;Acc:MGI:109277]	18710	4	116078815	116160253	q	1
NM_028019.4	Rnf135	157.62	0.112884	0.152154	0.741909	0.458143	0.769999	0.11351	NM_028019	71956	ring finger protein 135 [Source:MGI Symbol;Acc:MGI:1919206]	71956	11	80074677	80090583	q	1
NM_001314013.1	Atg5	1754.88	0.077876	0.0793166	0.981837	0.32618	0.772553	0.112072	NM_001314013	11793	autophagy related 5 [Source:MGI Symbol;Acc:MGI:1277186]	11793	10	44144354	44240287	q	1
NM_007545.2	Hrk	481.705	-0.250943	0.256068	-0.979985	0.327093	0.772553	0.112072	NM_007545	12123	harakiri, BCL2 interacting protein (contains only BH3 domain) [Source:MGI Symbol;Acc:MGI:1201608]	12123	5	118302713	118327543	q	1
NM_001253795.1	Tarbp2	501.725	-0.0969781	0.0990614	-0.978969	0.327595	0.772553	0.112072	NM_001253795	21357	TARBP2, RISC loading complex RNA binding subunit [Source:MGI Symbol;Acc:MGI:103027]	21357	15	102426627	102432111	q	1
NM_007825.4	Cyp7b1	513.285	0.0967687	0.100374	0.964078	0.335007	0.775535	0.110398	NM_007825	13123	cytochrome P450, family 7, subfamily b, polypeptide 1 [Source:MGI Symbol;Acc:MGI:104978]	13123	3	18126114	18297502	q	-1
NM_008566.2	Mcm5	216.348	-0.182069	0.188093	-0.967975	0.333057	0.775535	0.110398	NM_008566	17218	minichromosome maintenance complex component 5 [Source:MGI Symbol;Acc:MGI:103197]	17218	8	75836197	75855067	q	1
NM_018736.2	Mre11a	664.812	-0.121501	0.125409	-0.968845	0.332622	0.775535	0.110398	NM_018736	17535	MRE11A homolog A, double strand break repair nuclease [Source:MGI Symbol;Acc:MGI:1100512]	17535	9	14695950	14748419	q	1
NM_012052.2	Rps3	379.366	0.0992964	0.10269	0.966953	0.333568	0.775535	0.110398	NM_012052	27050	ribosomal protein S3 [Source:MGI Symbol;Acc:MGI:1350917]	27050	7	99127103	99132945	q	-1
NM_008628.2	Msh2	1460.02	0.0971892	0.101373	0.95873	0.337695	0.777006	0.109575	NM_008628	17685	mutS homolog 2 [Source:MGI Symbol;Acc:MGI:101816]	17685	17	87979758	88031141	q	1
NM_011640.1	Trp53	258.45	-0.11224	0.116997	-0.959335	0.33739	0.777006	0.109575	NM_011640	22059	transformation related protein 53 [Source:MGI Symbol;Acc:MGI:98834]	22059	11	69471185	69482699	q	1
NM_145133.3	Tifa	368.92	0.132521	0.181078	0.731845	0.464263	0.777917	0.109067	NM_145133	211550	TRAF-interacting protein with forkhead-associated domain [Source:MGI Symbol;Acc:MGI:2182965]	211550	3	127583454	127625813	q	1
NM_009923.2	Cnp	31846.5	-0.154622	0.162446	-0.951837	0.341179	0.778658	0.108653	NM_009923	12799	2',3'-cyclic nucleotide 3' phosphodiesterase [Source:MGI Symbol;Acc:MGI:88437]	12799	11	100465730	100482555	q	1
NM_007872.4	Dnmt3a	894.374	-0.126816	0.133321	-0.951208	0.341499	0.778658	0.108653	NM_007872	13435	DNA methyltransferase 3A [Source:MGI Symbol;Acc:MGI:1261827]	13435	12	3856007	3964443	q	1
NM_001128605.1	Psen2	436.843	0.125543	0.132634	0.946538	0.343874	0.779379	0.108251	NM_001128605	19165	presenilin 2 [Source:MGI Symbol;Acc:MGI:109284]	19165	1	180054569	180091003	q	-1
NM_026653.2	Rpa1	1927.68	0.0522037	0.0557289	0.936743	0.348891	0.781391	0.107131	NM_026653	68275	replication protein A1 [Source:MGI Symbol;Acc:MGI:1915525]	68275	11	75188992	75239150	q	-1
NM_009082.2	Rpl29	9807.86	-0.109649	0.116878	-0.938147	0.348169	0.781391	0.107131	NM_009082	19944	ribosomal protein L29 [Source:MGI Symbol;Acc:MGI:99687]	19944	9	106306653	106308767	q	1
NM_001165894.1	Akt1	3407.38	-0.0548346	0.0756271	-0.725065	0.468412	0.78254	0.106494	NM_001165894	11651	thymoma viral proto-oncogene 1 [Source:MGI Symbol;Acc:MGI:87986]	11651	12	112620255	112641318	q	-1
NM_013477.3	Atp6v0d1	6884.39	-0.0504766	0.070474	-0.716244	0.473841	0.783583	0.105915	NM_013477	11972	ATPase, H+ transporting, lysosomal V0 subunit D1 [Source:MGI Symbol;Acc:MGI:1201778]	11972	8	106251097	106292679	q	-1
NM_008278.2	Hpgd	155.569	0.119095	0.16691	0.71353	0.475518	0.783583	0.105915	NM_008278	15446	hydroxyprostaglandin dehydrogenase 15 (NAD) [Source:MGI Symbol;Acc:MGI:108085]	15446	8	56747620	56774078	q	1
NM_001123382.1	Il1r1	235.395	0.12354	0.172717	0.715275	0.474439	0.783583	0.105915	NM_001123382	16177	interleukin 1 receptor, type I [Source:MGI Symbol;Acc:MGI:96545]	16177	1	40264240	40356417	q	1
NM_133500.1	Ntng2	394.763	-0.102365	0.142564	-0.718027	0.472741	0.783583	0.105915	NM_133500	171171	netrin G2 [Source:MGI Symbol;Acc:MGI:2159341]	171171	2	29084553	29143017	q	-1
NM_011530.2	Tap2	184.677	0.0818568	0.114845	0.712758	0.475996	0.783583	0.105915	NM_011530	21355	transporter 2, ATP-binding cassette, sub-family B (MDR/TAP) [Source:MGI Symbol;Acc:MGI:98484]	21355	17	34422501	34435295	q	1
NM_009876.3	Cdkn1c	129.318	-0.1661	0.179709	-0.92427	0.355346	0.783762	0.105816	NM_009876	12577	cyclin dependent kinase inhibitor 1C [Source:MGI Symbol;Acc:MGI:104564]	12577	7	143012076	143014787	q	-1
NM_008402.2	Itgav	1567.48	-0.106683	0.116543	-0.915403	0.35998	0.783762	0.105816	NM_008402	16410	integrin alpha V [Source:MGI Symbol;Acc:MGI:96608]	16410	2	83554741	83637260	q	1
NM_172262.3	Kdm1b	297.559	-0.0994344	0.108449	-0.91688	0.359206	0.783762	0.105816	NM_172262	218214	lysine (K)-specific demethylase 1B [Source:MGI Symbol;Acc:MGI:2145261]	218214	13	47196975	47238755	q	1
NM_152895.2	Kdm5b	1971.93	-0.114463	0.124902	-0.916423	0.359445	0.783762	0.105816	NM_152895	75605	lysine demethylase 5B [Source:MGI Symbol;Acc:MGI:1922855]	75605	1	134487909	134563023	q	1
NM_013668.3	Kdm5c	2196.23	-0.120359	0.131855	-0.912818	0.361338	0.783762	0.105816	NM_013668	20591	lysine demethylase 5C [Source:MGI Symbol;Acc:MGI:99781]	20591	X	151016016	151057531	q	1
NM_145152.4	Lrrc3	857.294	0.184616	0.201101	0.918029	0.358604	0.783762	0.105816	NM_145152	237387	leucine rich repeat containing 3 [Source:MGI Symbol;Acc:MGI:2447899]	237387	10	77733409	77738370	q	-1
NM_008927.3	Map2k1	9380.64	-0.154374	0.168973	-0.913599	0.360928	0.783762	0.105816	NM_008927	26395	mitogen-activated protein kinase kinase 1 [Source:MGI Symbol;Acc:MGI:1346866]	26395	9	64093052	64160913	q	-1
NM_008587.1	Mertk	696.813	-0.14401	0.157304	-0.915491	0.359934	0.783762	0.105816	NM_008587	17289	MER proto-oncogene tyrosine kinase [Source:MGI Symbol;Acc:MGI:96965]	17289	2	128540876	128644814	q	1
NM_033217.3	Ngfr	138.497	-0.561866	0.609304	-0.922145	0.356453	0.783762	0.105816	NM_033217	18053	nerve growth factor receptor (TNFR superfamily, member 16) [Source:MGI Symbol;Acc:MGI:97323]	18053	11	95459644	95478561	q	-1
NM_026959.2	Stx18	303.196	-0.111596	0.121059	-0.921838	0.356613	0.783762	0.105816	NM_026959	71116	syntaxin 18 [Source:MGI Symbol;Acc:MGI:1918366]	71116	5	38196086	38295109	q	1
NM_001136068.1	Klrc1	36.5572	-0.230135	0.326325	-0.705232	0.480666	0.785026	0.105116	NM_001136068	16641	killer cell lectin-like receptor subfamily C, member 1 [Source:MGI Symbol;Acc:MGI:1336161]	16641	6	129642978	129655936	q	-1
NM_016700.3	Mapk8	2385.74	0.0663674	0.0941907	0.704606	0.481055	0.785026	0.105116	NM_016700	26419	mitogen-activated protein kinase 8 [Source:MGI Symbol;Acc:MGI:1346861]	26419	14	33099855	33169115	q	-1
NM_008925.1	Prkcsh	2852.46	-0.0601476	0.0849564	-0.707982	0.478956	0.785026	0.105116	NM_008925	19089	protein kinase C substrate 80K-H [Source:MGI Symbol;Acc:MGI:107877]	19089	9	21914102	21925518	q	1
NM_010329.2	Pdpn	622.257	0.150392	0.165751	0.907336	0.364229	0.785531	0.104837	NM_010329	14726	podoplanin [Source:MGI Symbol;Acc:MGI:103098]	14726	4	142994001	143026134	q	-1
NM_010102.2	S1pr4	30.0901	-0.269904	0.297412	-0.907507	0.364139	0.785531	0.104837	NM_010102	13611	sphingosine-1-phosphate receptor 4 [Source:MGI Symbol;Acc:MGI:1333809]	13611	10	81333581	81335966	q	-1
NM_024181.2	Dnajc10	3081.35	-0.0499858	0.0714606	-0.699487	0.484248	0.787952	0.1035	NM_024181	66861	DnaJ heat shock protein family (Hsp40) member C10 [Source:MGI Symbol;Acc:MGI:1914111]	66861	2	80145810	80184387	q	1
NM_009322.3	Tbr1	70.8672	0.18958	0.210915	0.898844	0.368736	0.792991	0.100732	NM_009322	21375	T-box brain transcription factor 1 [Source:MGI Symbol;Acc:MGI:107404]	21375	2	61633274	61644458	q	1
NM_019933.2	Ptpn4	12414	0.229324	0.331577	0.691616	0.489179	0.793682	0.100353	NM_019933	19258	protein tyrosine phosphatase, non-receptor type 4 [Source:MGI Symbol;Acc:MGI:1099792]	19258	1	119580197	119765343	q	-1
NM_001080754.1	Ambra1	3174.19	-0.0558918	0.0627259	-0.891049	0.372903	0.7964	0.0988689	NM_001080754	228361	autophagy/beclin 1 regulator 1 [Source:MGI Symbol;Acc:MGI:2443564]	228361	2	91560479	91749194	q	1
NM_011132.2	Pole	56.1406	0.20002	0.224747	0.88998	0.373477	0.7964	0.0988689	NM_011132	18973	polymerase (DNA directed), epsilon [Source:MGI Symbol;Acc:MGI:1196391]	18973	5	110434172	110485340	q	1
NM_019455.4	Hpgds	233.73	0.147681	0.166746	0.885663	0.375799	0.799101	0.0973984	NM_019455	54486	hematopoietic prostaglandin D synthase [Source:MGI Symbol;Acc:MGI:1859384]	54486	6	65094277	65121892	q	-1
NM_146037.1	Kcnk13	152.647	-0.197806	0.224525	-0.880998	0.378319	0.799371	0.0972515	NM_146037	217826	potassium channel, subfamily K, member 13 [Source:MGI Symbol;Acc:MGI:2384976]	217826	12	99930758	100028941	q	1
NM_053269.3	Rad51c	78.1538	0.235243	0.267453	0.879567	0.379094	0.799371	0.0972515	NM_053269	114714	RAD51 paralog C [Source:MGI Symbol;Acc:MGI:2150020]	114714	11	87267471	87295780	q	-1
NM_007415.3	Parp1	481.71	0.0899556	0.132132	0.680802	0.495997	0.802432	0.0955917	NM_007415	11545	poly (ADP-ribose) polymerase family, member 1 [Source:MGI Symbol;Acc:MGI:1340806]	11545	1	180396489	180428819	q	1
NM_001025577.2	Maf	92.2194	0.140336	0.20735	0.676806	0.498529	0.804218	0.0946263	NM_001025577	17132	MAF bZIP transcription factor [Source:MGI Symbol;Acc:MGI:96909]	17132	8	116409681	116434533	q	-1
NM_010654.2	Klrd1	38.4015	-0.209751	0.311378	-0.67362	0.500553	0.805175	0.0941095	NM_010654	16643	killer cell lectin-like receptor, subfamily D, member 1 [Source:MGI Symbol;Acc:MGI:1196275]	16643	6	129568745	129575738	q	1
NM_011046.2	Furin	1064.22	0.0639698	0.0957912	0.667805	0.504258	0.808825	0.0921456	NM_011046	18550	furin, paired basic amino acid cleaving enzyme [Source:MGI Symbol;Acc:MGI:97513]	18550	7	80038333	80055184	q	-1
NM_008302.3	Hsp90ab1	21052.4	-0.0411856	0.0619175	-0.665169	0.505943	0.809221	0.091933	NM_008302	15516	heat shock protein 90 alpha (cytosolic), class B member 1 [Source:MGI Symbol;Acc:MGI:96247]	15516	17	45878701	45884197	q	-1
NM_008398.2	Itga7	223.592	0.246187	0.287169	0.85729	0.391285	0.822139	0.0850548	NM_008398	16404	integrin alpha 7 [Source:MGI Symbol;Acc:MGI:102700]	16404	10	128769645	128794155	q	1
NM_001033481.1	Myrf	3710.87	-0.127591	0.149076	-0.855881	0.392064	0.822139	0.0850548	NM_001033481	225908	myelin regulatory factor [Source:MGI Symbol;Acc:MGI:2684944]	225908	19	10185636	10218112	q	-1
NM_007725.2	Cnn2	199.87	-0.108772	0.128698	-0.845166	0.398018	0.826485	0.0827652	NM_007725	12798	calponin 2 [Source:MGI Symbol;Acc:MGI:105093]	12798	10	79824418	79831896	q	1
NM_001252403.1	Gria1	5486.95	-0.160937	0.189963	-0.847199	0.396884	0.826485	0.0827652	NM_001252403	14799	glutamate receptor, ionotropic, AMPA1 (alpha 1) [Source:MGI Symbol;Acc:MGI:95808]	14799	11	56902213	57221070	q	1
NM_026385.3	Pllp	905.297	-0.133529	0.157371	-0.848498	0.396161	0.826485	0.0827652	NM_026385	67801	plasma membrane proteolipid [Source:MGI Symbol;Acc:MGI:1915051]	67801	8	95401522	95422906	q	-1
NM_020279.3	Ccl28	32.2725	-0.266576	0.413417	-0.644812	0.519049	0.826495	0.0827596	NM_020279	56838	C-C motif chemokine ligand 28 [Source:MGI Symbol;Acc:MGI:1861731]	56838	13	120085355	120115895	q	1
NM_133983.4	Cd276	269.64	-0.0735363	0.114215	-0.64384	0.519679	0.826495	0.0827596	NM_133983	102657	CD276 antigen [Source:MGI Symbol;Acc:MGI:2183926]	102657	9	58431581	58462720	q	-1
NM_001003960.3	Dnmt3b	34.3811	-0.197249	0.234659	-0.840575	0.400586	0.828535	0.0816893	NM_001003960	13436	DNA methyltransferase 3B [Source:MGI Symbol;Acc:MGI:1261819]	13436	2	153491370	153529650	q	1
NM_133915.3	Pxn	146.154	0.105882	0.165654	0.639172	0.522711	0.828975	0.0814584	NM_133915	19303	paxillin [Source:MGI Symbol;Acc:MGI:108295]	19303	5	115644735	115694046	q	1
NM_001013779.2	Aim2	206.806	-0.106653	0.169685	-0.628536	0.529653	0.832151	0.079798	NM_001013779	383619	absent in melanoma 2 [Source:MGI Symbol;Acc:MGI:2686159]	383619	1	173178445	173293606	q	1
NM_145528.3	Atg13	2856.55	-0.0349362	0.0555368	-0.629064	0.529307	0.832151	0.079798	NM_145528	51897	autophagy related 13 [Source:MGI Symbol;Acc:MGI:1196429]	51897	2	91504963	91540921	q	-1
NM_010375.2	Gzmg	29.6535	-0.180666	0.28812	-0.627052	0.530625	0.832151	0.079798	NM_010375	14944	granzyme G [Source:MGI Symbol;Acc:MGI:109253]	14944	14	56394039	56397036	q	-1
NM_009498.4	Vamp3	1147.77	0.051425	0.0817233	0.629257	0.529181	0.832151	0.079798	NM_009498	22319	vesicle-associated membrane protein 3 [Source:MGI Symbol;Acc:MGI:1321389]	22319	4	151131757	151142420	q	-1
NM_024207.4	Derl1	1546.56	0.0446977	0.0717286	0.62315	0.533186	0.833844	0.0789153	NM_024207	67819	Der1-like domain family, member 1 [Source:MGI Symbol;Acc:MGI:1915069]	67819	15	57732898	57755844	q	-1
NM_001170537.1	Mef2c	4245.45	-0.077935	0.0935096	-0.833444	0.404594	0.834545	0.0785503	NM_001170537	17260	myocyte enhancer factor 2C [Source:MGI Symbol;Acc:MGI:99458]	17260	13	83652153	83815199	q	1
NM_025735.3	Map1lc3a	8642.52	-0.0546314	0.0885713	-0.616808	0.537362	0.838046	0.0767322	NM_025735	66734	microtubule-associated protein 1 light chain 3 alpha [Source:MGI Symbol;Acc:MGI:1915661]	66734	2	155118217	155119993	q	1
NM_007987.2	Fas	77.6226	-0.132019	0.220371	-0.599076	0.549122	0.838704	0.0763914	NM_007987	14102	Fas cell surface death receptor [Source:MGI Symbol;Acc:MGI:95484]	14102	19	34268066	34305172	q	1
NM_010248.2	Gab2	536.352	0.0684697	0.11493	0.595753	0.55134	0.838704	0.0763914	NM_010248	14389	growth factor receptor bound protein 2-associated protein 2 [Source:MGI Symbol;Acc:MGI:1333854]	14389	7	96730793	96958153	q	1
NM_010511.2	Ifngr1	1030.94	0.0632581	0.103428	0.611617	0.540791	0.838704	0.0763914	NM_010511	15979	interferon gamma receptor 1 [Source:MGI Symbol;Acc:MGI:107655]	15979	10	19467697	19485977	q	1
NM_010851.2	Myd88	85.4458	0.114225	0.188603	0.605634	0.544758	0.838704	0.0763914	NM_010851	17874	myeloid differentiation primary response gene 88 [Source:MGI Symbol;Acc:MGI:108005]	17874	9	119165000	119170477	q	-1
NM_001205075.1	Pnoc	529.683	-0.158008	0.258603	-0.611008	0.541194	0.838704	0.0763914	NM_001205075	18155	prepronociceptin [Source:MGI Symbol;Acc:MGI:105308]	18155	14	65638122	65662921	q	-1
NM_001146124.1	Psap	15337.4	0.0424075	0.069975	0.606039	0.544489	0.838704	0.0763914	NM_001146124	19156	prosaposin [Source:MGI Symbol;Acc:MGI:97783]	19156	10	60113449	60138376	q	1
NM_009045.4	Rela	359.832	0.0572896	0.0952203	0.601654	0.547404	0.838704	0.0763914	NM_009045	19697	v-rel reticuloendotheliosis viral oncogene homolog A (avian) [Source:MGI Symbol;Acc:MGI:103290]	19697	19	5687511	5698158	q	1
NM_023059.3	Sigirr	47.3581	-0.154199	0.258083	-0.59748	0.550187	0.838704	0.0763914	NM_023059	24058	single immunoglobulin and toll-interleukin 1 receptor (TIR) domain [Source:MGI Symbol;Acc:MGI:1344402]	24058	7	140671088	140680485	q	-1
NM_013672.2	Sp1	694.054	-0.0586208	0.0988414	-0.593079	0.553128	0.838704	0.0763914	NM_013672	20683	trans-acting transcription factor 1 [Source:MGI Symbol;Acc:MGI:98372]	20683	15	102314578	102344839	q	1
NM_013881.4	Ulk2	1295.72	0.0477514	0.0803091	0.594595	0.552114	0.838704	0.0763914	NM_013881	29869	unc-51 like kinase 2 [Source:MGI Symbol;Acc:MGI:1352758]	29869	11	61666475	61745899	q	-1
NM_133945.1	Vrk3	196.074	-0.0944872	0.159735	-0.591523	0.55417	0.838704	0.0763914	NM_133945	101568	vaccinia related kinase 3 [Source:MGI Symbol;Acc:MGI:2182465]	101568	7	44397837	44426939	q	1
NM_007527.3	Bax	445.032	-0.0525551	0.0913504	-0.575313	0.56508	0.839026	0.0762244	NM_007527	12028	BCL2-associated X protein [Source:MGI Symbol;Acc:MGI:99702]	12028	7	45111121	45116322	q	-1
NM_016746.4	Ccnc	1556.89	-0.0444706	0.0766252	-0.580364	0.561669	0.839026	0.0762244	NM_016746	51813	cyclin C [Source:MGI Symbol;Acc:MGI:1858199]	51813	4	21727701	21759922	q	1
NM_007838.2	Ddost	1309.43	-0.0712699	0.121886	-0.584725	0.558732	0.839026	0.0762244	NM_007838	13200	dolichyl-di-phosphooligosaccharide-protein glycotransferase [Source:MGI Symbol;Acc:MGI:1194508]	13200	4	138032041	138039939	q	1
[truncated: 671 more rows]

## Sheet: MG IFNAR KO TBI vs WT TBI
MG IFNAR KO TBI vs WT TBI
[truncated: 1,339 more rows]
