# Supplementary material for: Type I interferon signaling in microglia drives synaptic engulfment and neuronal loss following traumatic brain injury
Source: Research Square preprint supplement (doi:10.21203/rs.3.rs-9785030/v1), 2026-06-06
Supplement: Supplementary file 3 [file 9caedeb56c99c4d9fab194c7.xlsx]

## Sheet: WT TBI vs control
WT TBI vs control
goId	goName	countDE	countAll	pv	pv_fdr	pv_Bonferroni	pv_high_specificity_pruning	pv_smallest_common_denominator_pruning	neg log 10
GO:0032760	positive regulation of tumor necrosis factor production	28	70	1.6e-08	2.21714e-06	6.208e-05	6.208e-05	6.208e-05	4.20705
GO:0045087	innate immune response	82	269	5.1e-17	2.4735e-14	1.9788e-13	0.006111	9.312e-05	4.03096
GO:0051607	defense response to virus	36	109	4.5e-08	4.85e-06	0.0001746	0.173108	0.00069064	3.16075
GO:0042742	defense response to bacterium	30	84	1e-07	9.46341e-06	0.000388	0.0185378	0.00069064	3.16075
GO:0071219	cellular response to molecule of bacterial origin	33	98	1.1e-07	9.92558e-06	0.0004268	0.959826	0.00069064	3.16075
GO:0062208	positive regulation of pattern recognition receptor signaling pathway	14	24	3e-07	2.37551e-05	0.001164	0.185378	0.000840667	3.07538
GO:0032653	regulation of interleukin-10 production	16	34	2e-06	0.000123175	0.00776	1	0.00110857	2.95524
GO:0002478	antigen processing and presentation of exogenous peptide antigen	12	21	3.1e-06	0.000169408	0.012028	1	0.0015035	2.8229
GO:0048525	negative regulation of viral process	16	36	5.1e-06	0.000244296	0.019788	0.769029	0.0019788	2.7036
GO:0050766	positive regulation of phagocytosis	16	36	5.1e-06	0.000244296	0.019788	0.029488	0.0019788	2.7036
GO:0002495	antigen processing and presentation of peptide antigen via MHC class II	10	16	7.3e-06	0.000333224	0.028324	1	0.00257491	2.58924
GO:0071621	granulocyte chemotaxis	24	63	5.9e-07	4.08786e-05	0.0022892	1	0.002619	2.58186
GO:0001774	microglial cell activation	14	31	1.7e-05	0.000701702	0.06596	0.173108	0.00507385	2.29466
GO:0032675	regulation of interleukin-6 production	23	71	2.6e-05	0.00098902	0.10088	0.769029	0.00720571	2.14232
GO:0032481	positive regulation of type I interferon production	16	41	3.8e-05	0.00139094	0.14744	0.895296	0.0094575	2.02422
GO:0002246	wound healing involved in inflammatory response	6	7	3.9e-05	0.00141421	0.15132	0.0185378	0.0094575	2.02422
GO:0002371	dendritic cell cytokine production	9	14	1.6e-05	0.000667527	0.06208	1	0.0150635	1.82207
GO:0002548	monocyte chemotaxis	10	21	0.00017	0.00477971	0.6596	0.591387	0.0347158	1.45947
GO:0048246	macrophage chemotaxis	10	21	0.00017	0.00477971	0.6596	0.591387	0.0347158	1.45947
GO:0032722	positive regulation of chemokine production	15	42	0.00022	0.00596923	0.8536	0.769029	0.04268	1.36978
GO:0070106	interleukin-27-mediated signaling pathway	5	6	0.00025	0.00659864	0.97	0.060625	0.0461905	1.33545
GO:0050729	positive regulation of inflammatory response	24	71	7.3e-06	0.000333224	0.028324	0.5335	0.0493818	1.30643
GO:0045730	respiratory burst	9	12	2.2e-06	0.000131323	0.008536	0.504946	0.0537231
GO:0050777	negative regulation of immune response	22	60	3.9e-06	0.00020176	0.015132	0.769029	0.0537231
GO:0002888	positive regulation of myeloid leukocyte mediated immunity	9	14	1.6e-05	0.000667527	0.06208	1	0.0537231
GO:1904149	regulation of microglial cell mediated cytotoxicity	4	4	0.00035	0.00843478	1	0.769029	0.0537231
GO:0044546	NLRP3 inflammasome complex assembly	8	16	0.00053	0.0116841	1	0.769029	0.0734429
GO:0070269	pyroptotic inflammatory response	8	16	0.00053	0.0116841	1	0.591387	0.0734429
GO:0035456	response to interferon-beta	10	24	0.00065	0.0138571	1	0.769029	0.0869655
GO:0098883	synapse pruning	6	8	0.00014	0.00405373	0.5432	0.504946	0.094575
GO:0002887	negative regulation of myeloid leukocyte mediated immunity	5	7	0.00078	0.015845	1	0.137564	0.094575
GO:0032661	regulation of interleukin-18 production	5	7	0.00078	0.015845	1	0.895296	0.094575
GO:0001780	neutrophil homeostasis	8	17	0.00089	0.017095	1	0.591387	0.101565
GO:1905523	positive regulation of macrophage migration	8	17	0.00089	0.017095	1	0.769029	0.101565
GO:0006911	phagocytosis, engulfment	10	21	0.00017	0.00477971	0.6596	0.0471143	0.121789
GO:0061844	antimicrobial humoral immune response mediated by antimicrobial peptide	12	34	0.00111	0.0208058	1	0.173108	0.121789
GO:0001788	antibody-dependent cellular cytotoxicity	4	5	0.00156	0.0268226	1	0.195252	0.146886
GO:0001810	regulation of type I hypersensitivity	4	5	0.00156	0.0268226	1	0.769029	0.146886
GO:0010819	regulation of T cell chemotaxis	4	5	0.00156	0.0268226	1	0.769029	0.146886
GO:0034238	macrophage fusion	4	5	0.00156	0.0268226	1	0.769029	0.146886
GO:2000341	regulation of chemokine (C-X-C motif) ligand 2 production	6	11	0.00159	0.0268226	1	1	0.146886
GO:0002286	T cell activation involved in immune response	13	56	0.03472	0.249009	1	0.926324	0.146886
GO:0002316	follicular B cell differentiation	3	3	0.00257	0.0382054	1	0.276989	0.216774
GO:0060264	regulation of respiratory burst involved in inflammatory response	3	3	0.00257	0.0382054	1	0.769029	0.216774
GO:0071659	negative regulation of IP-10 production	3	3	0.00257	0.0382054	1	0.276989	0.216774
GO:0071727	cellular response to triacyl bacterial lipopeptide	3	3	0.00257	0.0382054	1	0.276989	0.216774
GO:0061081	positive regulation of myeloid leukocyte cytokine production involved in immune response	10	28	0.00264	0.0390962	1	0.895296	0.21794
GO:0070098	chemokine-mediated signaling pathway	15	48	0.00115	0.0214519	1	0.173108	0.253388
GO:0071402	cellular response to lipoprotein particle stimulus	7	16	0.00319	0.045008	1	0.895296	0.253388
GO:0038094	Fc-gamma receptor signaling pathway	4	6	0.00416	0.0552767	1	0.375367	0.3104
GO:0043301	negative regulation of leukocyte degranulation	4	6	0.00416	0.0552767	1	0.375367	0.3104
GO:0050858	negative regulation of antigen receptor-mediated signaling pathway	4	6	0.00416	0.0552767	1	1	0.3104
GO:0006897	endocytosis	40	148	3.4e-06	0.00017827	0.013192	0.895296	0.355057
GO:0031640	killing of cells of another organism	11	34	0.00396	0.0537231	1	0.769029	0.380815
GO:0045670	regulation of osteoclast differentiation	9	26	0.00551	0.0678692	1	1	0.388705
GO:0006956	complement activation	6	12	0.00282	0.0409798	1	1	0.431483
GO:2000406	positive regulation of T cell migration	6	12	0.00282	0.0409798	1	0.769029	0.431483
GO:0032611	interleukin-1 beta production	14	51	0.00641	0.0779649	1	0.769029	0.431483
GO:0002762	negative regulation of myeloid leukocyte differentiation	5	10	0.00657	0.0784357	1	1	0.432061
GO:0009617	response to bacterium	64	213	2.8e-12	7.24267e-10	1.0864e-08	0.4074	0.448426
GO:0016064	immunoglobulin mediated immune response	21	54	2.2e-06	0.000131323	0.008536	0.769029	0.448426
GO:0007229	integrin-mediated signaling pathway	9	27	0.0073	0.0840475	1	0.504946	0.456839
GO:0002376	immune system process	139	644	8.9e-19	7.11333e-16	3.4532e-15	0.895296	0.457719
GO:0002275	myeloid cell activation involved in immune response	21	42	1e-08	1.43704e-06	3.88e-05	0.591387	0.457719
GO:0098581	detection of external biotic stimulus	7	13	0.00069	0.0144714	1	0.895296	0.493058
GO:0014004	microglia differentiation	5	8	0.00185	0.0299083	1	0.769029	0.497933
GO:0043615	astrocyte cell migration	4	6	0.00416	0.0552767	1	0.375367	0.497933
GO:0002430	complement receptor mediated signaling pathway	4	7	0.00868	0.096777	1	0.504946	0.497933
GO:0002270	plasmacytoid dendritic cell activation	3	4	0.00924	0.0971577	1	0.895296	0.497933
GO:0033004	negative regulation of mast cell activation	3	4	0.00924	0.0971577	1	0.895296	0.497933
GO:0110089	regulation of hippocampal neuron apoptotic process	3	4	0.00924	0.0971577	1	0.504946	0.497933
GO:1901509	regulation of endothelial tube morphogenesis	3	4	0.00924	0.0971577	1	0.504946	0.497933
GO:0002468	dendritic cell antigen processing and presentation	5	11	0.01073	0.1073	1	0.570307	0.5626
GO:0140962	multicellular organismal-level chemical homeostasis	5	11	0.01073	0.1073	1	0.769029	0.5626
GO:0036006	cellular response to macrophage colony-stimulating factor stimulus	5	6	0.00025	0.00659864	0.97	0.504946	0.73332
GO:0045576	mast cell activation	11	27	0.00044	0.0102843	1	0.769029	0.73332
GO:0042554	superoxide anion generation	8	21	0.00454	0.0585223	1	0.383872	0.73332
GO:0002230	positive regulation of defense response to virus by host	6	16	0.01518	0.141931	1	0.591387	0.73332
GO:0035455	response to interferon-alpha	6	16	0.01518	0.141931	1	0.591387	0.73332
GO:0002755	MyD88-dependent toll-like receptor signaling pathway	4	8	0.01551	0.141931	1	0.591387	0.73332
GO:0002903	negative regulation of B cell apoptotic process	4	8	0.01551	0.141931	1	0.591387	0.73332
GO:0032667	regulation of interleukin-23 production	4	8	0.01551	0.141931	1	0.591387	0.73332
GO:0002314	germinal center B cell differentiation	2	2	0.01887	0.155364	1	0.591387	0.73332
GO:0002924	negative regulation of humoral immune response mediated by circulating immunoglobulin	2	2	0.01887	0.155364	1	0.591387	0.73332
GO:0006742	NADP catabolic process	2	2	0.01887	0.155364	1	0.591387	0.73332
GO:0007567	parturition	2	2	0.01887	0.155364	1	0.591387	0.73332
GO:0030214	hyaluronan catabolic process	2	2	0.01887	0.155364	1	0.591387	0.73332
GO:0031424	keratinization	2	2	0.01887	0.155364	1	0.591387	0.73332
GO:0032020	ISG15-protein conjugation	2	2	0.01887	0.155364	1	0.591387	0.73332
GO:0032829	regulation of CD4-positive, CD25-positive, alpha-beta regulatory T cell differentiation	2	2	0.01887	0.155364	1	0.591387	0.73332
GO:0038195	urokinase plasminogen activator signaling pathway	2	2	0.01887	0.155364	1	0.591387	0.73332
GO:0042495	detection of triacyl bacterial lipopeptide	2	2	0.01887	0.155364	1	0.591387	0.73332
GO:0060335	positive regulation of type II interferon-mediated signaling pathway	2	2	0.01887	0.155364	1	0.591387	0.73332
GO:0060435	bronchiole development	2	2	0.01887	0.155364	1	0.591387	0.73332
GO:0060700	regulation of ribonuclease activity	2	2	0.01887	0.155364	1	0.591387	0.73332
GO:0061888	regulation of astrocyte activation	2	2	0.01887	0.155364	1	0.591387	0.73332
GO:1904783	positive regulation of NMDA glutamate receptor activity	2	2	0.01887	0.155364	1	0.591387	0.73332
GO:2000473	positive regulation of hematopoietic stem cell migration	2	2	0.01887	0.155364	1	0.591387	0.73332
GO:0032757	positive regulation of interleukin-8 production	10	36	0.0189	0.155364	1	0.591387	0.73332
GO:0045581	negative regulation of T cell differentiation	5	15	0.04394	0.294961	1	0.769029	0.73332
GO:0001798	positive regulation of type IIa hypersensitivity	3	5	0.02077	0.164033	1	0.603716	0.774881
GO:0002238	response to molecule of fungal origin	3	5	0.02077	0.164033	1	0.603716	0.774881
GO:0070723	response to cholesterol	3	5	0.02077	0.164033	1	0.603716	0.774881
GO:2000501	regulation of natural killer cell chemotaxis	3	5	0.02077	0.164033	1	0.603716	0.774881
GO:0043299	leukocyte degranulation	12	27	8.5e-05	0.00259685	0.3298	0.769029	0.818495
GO:0030889	negative regulation of B cell proliferation	4	9	0.02496	0.188048	1	0.686843	0.905092
GO:0032874	positive regulation of stress-activated MAPK cascade	4	9	0.02496	0.188048	1	0.686843	0.905092
GO:0045577	regulation of B cell differentiation	7	20	0.01332	0.128882	1	0.591387	0.978263
GO:0007200	phospholipase C-activating G protein-coupled receptor signaling pathway	6	18	0.02779	0.205773	1	0.748786	0.989222
GO:0032623	interleukin-2 production	9	33	0.02872	0.211449	1	0.758052	0.998061
GO:1901224	positive regulation of non-canonical NF-kappaB signal transduction	9	33	0.02872	0.211449	1	0.758052	0.998061
GO:0070372	regulation of ERK1 and ERK2 cascade	15	66	0.02881	0.21171	1	0.959826	0.998061
GO:0006955	immune response	130	515	6.1e-24	2.3668e-20	2.3668e-20	0.717254	1
GO:0140546	defense response to symbiont	93	314	4.5e-19	7.11333e-16	1.746e-15	1	1
GO:0098542	defense response to other organism	97	339	6.2e-19	7.11333e-16	2.4056e-15	1	1
GO:0043207	response to external biotic stimulus	108	411	1.1e-18	7.11333e-16	4.268e-15	1	1
GO:0051707	response to other organism	108	411	1.1e-18	7.11333e-16	4.268e-15	1	1
GO:0009607	response to biotic stimulus	109	422	3e-18	1.66286e-15	1.164e-14	1	1
GO:0006952	defense response	114	475	1.6e-16	6.89778e-14	6.208e-13	1	1
GO:0044419	biological process involved in interspecies interaction between organisms	108	436	2.7e-16	1.0476e-13	1.0476e-12	1	1
GO:0009605	response to external stimulus	121	550	1.5e-14	5.29091e-12	5.82e-11	1	1
GO:0050776	regulation of immune response	82	302	1.7e-13	5.49667e-11	6.596e-10	0.769029	1
GO:0002252	immune effector process	73	253	3e-13	8.95385e-11	1.164e-09	1	1
GO:0002682	regulation of immune system process	104	450	7.9e-13	2.18943e-10	3.0652e-09	1	1
GO:0002443	leukocyte mediated immunity	55	168	3.9e-12	9.4575e-10	1.5132e-08	1	1
GO:0050778	positive regulation of immune response	70	256	2.8e-11	6.39059e-09	1.0864e-07	0.895296	1
GO:0002684	positive regulation of immune system process	86	362	1.7e-10	3.66444e-08	6.596e-07	0.865732	1
GO:0002831	regulation of response to biotic stimulus	53	176	4.7e-10	9.59789e-08	1.8236e-06	0.942106	1
GO:0002697	regulation of immune effector process	51	167	6.6e-10	1.2804e-07	2.5608e-06	0.921372	1
GO:0045088	regulation of innate immune response	47	150	1.5e-09	2.77143e-07	5.82e-06	0.769029	1
GO:0032103	positive regulation of response to external stimulus	61	225	1.8e-09	3.17455e-07	6.984e-06	1	1
GO:0002274	myeloid leukocyte activation	37	103	1.9e-09	3.20522e-07	7.372e-06	0.976626	1
GO:0032101	regulation of response to external stimulus	75	308	2.2e-09	3.4144e-07	8.536e-06	1	1
GO:0002253	activation of immune response	51	172	2.2e-09	3.4144e-07	8.536e-06	0.769029	1
GO:0002703	regulation of leukocyte mediated immunity	38	112	7.2e-09	1.07446e-06	2.7936e-05	1	1
GO:0071706	tumor necrosis factor superfamily cytokine production	34	97	2.1e-08	2.80966e-06	8.148e-05	0.769029	1
GO:1903557	positive regulation of tumor necrosis factor superfamily cytokine production	28	71	2.3e-08	2.97467e-06	8.924e-05	1	1
GO:0031349	positive regulation of defense response	51	184	3.2e-08	3.88e-06	0.00012416	1	1
GO:0002764	immune response-regulating signaling pathway	48	168	3.2e-08	3.88e-06	0.00012416	0.959826	1
GO:1903555	regulation of tumor necrosis factor superfamily cytokine production	33	94	3.3e-08	3.88e-06	0.00012804	0.820358	1
GO:0019882	antigen processing and presentation	22	48	3.5e-08	3.99412e-06	0.0001358	0.819158	1
GO:0032640	tumor necrosis factor production	33	95	4.5e-08	4.85e-06	0.0001746	0.895296	1
GO:0045089	positive regulation of innate immune response	40	129	5.2e-08	5.45297e-06	0.00020176	0.603716	1
GO:0031347	regulation of defense response	63	255	5.8e-08	5.92211e-06	0.00022504	1	1
GO:0032680	regulation of tumor necrosis factor production	32	92	7.3e-08	7.26256e-06	0.00028324	0.930622	1
GO:0048002	antigen processing and presentation of peptide antigen	17	32	9.4e-08	9.118e-06	0.00036472	0.895296	1
GO:0002833	positive regulation of response to biotic stimulus	41	137	1.1e-07	9.92558e-06	0.0004268	1	1
GO:0034341	response to type II interferon	21	48	2e-07	1.76364e-05	0.000776	0.336947	1
GO:0009615	response to virus	39	130	2.2e-07	1.89689e-05	0.0008536	1	1
GO:0002444	myeloid leukocyte mediated immunity	20	45	2.9e-07	2.37551e-05	0.0011252	0.769029	1
GO:0097530	granulocyte migration	27	74	3e-07	2.37551e-05	0.001164	1	1
GO:0006909	phagocytosis	29	83	3e-07	2.37551e-05	0.001164	0.591387	1
GO:0002237	response to molecule of bacterial origin	42	147	3.2e-07	2.4832e-05	0.0012416	0.781198	1
GO:0071216	cellular response to biotic stimulus	35	112	3.6e-07	2.73882e-05	0.0013968	0.959826	1
GO:0002683	negative regulation of immune system process	41	143	4.1e-07	3.05923e-05	0.0015908	1	1
GO:0002757	immune response-activating signaling pathway	43	154	4.6e-07	3.36755e-05	0.0017848	0.959826	1
GO:0002218	activation of innate immune response	33	104	5.6e-07	4.0237e-05	0.0021728	0.769029	1
GO:0002366	leukocyte activation involved in immune response	35	114	5.8e-07	4.08786e-05	0.0022504	0.895296	1
GO:0006954	inflammatory response	64	276	6.5e-07	4.42456e-05	0.002522	0.769029	1
GO:0002263	cell activation involved in immune response	35	115	7.4e-07	4.95034e-05	0.0028712	0.896067	1
GO:0071222	cellular response to lipopolysaccharide	30	92	1e-06	6.57627e-05	0.00388	0.006111	1
GO:0030595	leukocyte chemotaxis	31	97	1.1e-06	7.11333e-05	0.004268	1	1
GO:0097529	myeloid leukocyte migration	32	102	1.2e-06	7.63279e-05	0.004656	1	1
GO:0002886	regulation of myeloid leukocyte mediated immunity	15	30	1.6e-06	0.000100129	0.006208	0.916193	1
GO:0002758	innate immune response-activating signaling pathway	30	95	2.3e-06	0.000133194	0.008924	0.895296	1
GO:1990266	neutrophil migration	20	50	2.3e-06	0.000133194	0.008924	1	1
GO:0034097	response to cytokine	71	330	2.8e-06	0.0001552	0.010864	1	1
GO:0001906	cell killing	29	91	2.8e-06	0.0001552	0.010864	1	1
GO:0002221	pattern recognition receptor signaling pathway	29	91	2.8e-06	0.0001552	0.010864	0.769029	1
GO:0032496	response to lipopolysaccharide	38	137	3.2e-06	0.000170082	0.012416	0.945932	1
GO:0032613	interleukin-10 production	16	35	3.2e-06	0.000170082	0.012416	1	1
GO:0032606	type I interferon production	21	56	4.4e-06	0.000224632	0.017072	0.769029	1
GO:0002704	negative regulation of leukocyte mediated immunity	15	32	4.5e-06	0.000226753	0.01746	0.769029	1
GO:0002699	positive regulation of immune effector process	34	118	4.6e-06	0.000228821	0.017848	0.769029	1
GO:1901652	response to peptide	71	334	4.7e-06	0.000230835	0.018236	1	1
GO:0019884	antigen processing and presentation of exogenous antigen	12	22	6e-06	0.000283902	0.02328	1	1
GO:0042590	antigen processing and presentation of exogenous peptide antigen via MHC class I	6	6	6.3e-06	0.000294506	0.024444	0.006111	1
GO:0030593	neutrophil chemotaxis	17	41	8e-06	0.00036093	0.03104	0.006208	1
GO:0019724	B cell mediated immunity	21	58	8.5e-06	0.00037908	0.03298	1	1
GO:0016192	vesicle-mediated transport	51	217	1.1e-05	0.000485	0.04268	0.959826	1
GO:0032479	regulation of type I interferon production	20	55	1.3e-05	0.000566742	0.05044	0.769029	1
GO:0045071	negative regulation of viral genome replication	11	20	1.4e-05	0.000603556	0.05432	0.00905333	1
GO:0002504	antigen processing and presentation of peptide or polysaccharide antigen via MHC class II	10	17	1.6e-05	0.000667527	0.06208	1	1
GO:0071346	cellular response to type II interferon	15	35	1.8e-05	0.0007275	0.06984	0.0471143	1
GO:0002753	cytoplasmic pattern recognition receptor signaling pathway	22	65	1.8e-05	0.0007275	0.06984	0.895296	1
GO:0140374	antiviral innate immune response	12	24	1.9e-05	0.00076	0.07372	0.0105314	1
GO:0002698	negative regulation of immune effector process	19	52	2.1e-05	0.000831429	0.08148	1	1
GO:0001817	regulation of cytokine production	60	277	2.3e-05	0.0008924	0.08924	1	1
GO:0042116	macrophage activation	18	48	2.3e-05	0.0008924	0.08924	0.869525	1
GO:0002269	leukocyte activation involved in inflammatory response	14	32	2.6e-05	0.00098902	0.10088	1	1
GO:0001819	positive regulation of cytokine production	49	213	3.3e-05	0.00124311	0.12804	1	1
GO:1905517	macrophage migration	13	29	3.8e-05	0.00139094	0.14744	1	1
GO:0050764	regulation of phagocytosis	19	54	3.8e-05	0.00139094	0.14744	1	1
GO:0098657	import into cell	41	168	4.2e-05	0.00149505	0.16296	1	1
GO:0002768	immune response-regulating cell surface receptor signaling pathway	30	108	4.2e-05	0.00149505	0.16296	1	1
GO:0060326	cell chemotaxis	32	119	4.6e-05	0.00162255	0.17848	1	1
GO:0062207	regulation of pattern recognition receptor signaling pathway	17	46	4.9e-05	0.0016975	0.19012	1	1
GO:0071677	positive regulation of mononuclear cell migration	17	46	4.9e-05	0.0016975	0.19012	0.769029	1
GO:0002687	positive regulation of leukocyte migration	22	69	5.3e-05	0.00178817	0.20564	1	1
GO:0006935	chemotaxis	35	136	5.3e-05	0.00178817	0.20564	1	1
GO:0042330	taxis	35	136	5.3e-05	0.00178817	0.20564	1	1
GO:0032635	interleukin-6 production	23	74	5.5e-05	0.00183966	0.2134	0.769029	1
GO:0002250	adaptive immune response	44	188	6.3e-05	0.00208923	0.24444	0.896067	1
GO:0006959	humoral immune response	22	70	6.8e-05	0.00221714	0.26384	1	1
GO:0001816	cytokine production	63	305	6.8e-05	0.00221714	0.26384	1	1
GO:0032602	chemokine production	19	56	6.9e-05	0.002231	0.26772	0.895296	1
GO:0002449	lymphocyte mediated immunity	33	127	7.4e-05	0.00235344	0.28712	0.895296	1
GO:0050727	regulation of inflammatory response	33	127	7.4e-05	0.00235344	0.28712	0.990976	1
GO:0002730	regulation of dendritic cell cytokine production	8	13	7.7e-05	0.00242894	0.29876	0.195252	1
GO:0045321	leukocyte activation	67	332	7.8e-05	0.00244065	0.30264	1	1
GO:0032642	regulation of chemokine production	18	52	8e-05	0.0024832	0.3104	0.959826	1
GO:0050900	leukocyte migration	36	144	8.1e-05	0.00249429	0.31428	1	1
GO:0060759	regulation of response to cytokine stimulus	19	57	9.1e-05	0.00275844	0.35308	1	1
GO:0032755	positive regulation of interleukin-6 production	18	53	0.00011	0.00330853	0.4268	0.0388	1
GO:0071675	regulation of mononuclear cell migration	19	58	0.00012	0.0035542	0.4656	1	1
GO:0071345	cellular response to cytokine stimulus	60	291	0.00012	0.0035542	0.4656	1	1
GO:0061900	glial cell activation	14	36	0.00013	0.00379248	0.5044	1	1
GO:0060760	positive regulation of response to cytokine stimulus	13	32	0.00013	0.00379248	0.5044	0.504946	1
GO:0019886	antigen processing and presentation of exogenous peptide antigen via MHC class II	8	14	0.00016	0.00459852	0.6208	0.0471143	1
GO:0032728	positive regulation of interferon-beta production	11	25	0.00019	0.00526571	0.7372	0.0491467	1
GO:0036230	granulocyte activation	11	25	0.00019	0.00526571	0.7372	0.769029	1
GO:0002688	regulation of leukocyte chemotaxis	17	51	0.00022	0.00596923	0.8536	0.959826	1
GO:0150076	neuroinflammatory response	15	42	0.00022	0.00596923	0.8536	1	1
GO:0141084	inflammasome-mediated signaling pathway	9	18	0.00023	0.00615448	0.8924	1	1
GO:0080134	regulation of response to stress	68	349	0.00023	0.00615448	0.8924	1	1
GO:0006950	response to stress	121	731	0.00026	0.00672533	1	1	1
GO:0002700	regulation of production of molecular mediator of immune response	24	86	0.00026	0.00672533	1	1	1
GO:0048584	positive regulation of response to stimulus	93	522	0.00026	0.00672533	1	1	1
GO:0010324	membrane invagination	10	22	0.00028	0.00710065	1	1	1
GO:0032733	positive regulation of interleukin-10 production	10	22	0.00028	0.00710065	1	0.0639059	1
GO:0099024	plasma membrane invagination	10	22	0.00028	0.00710065	1	1	1
GO:0001909	leukocyte mediated cytotoxicity	19	62	0.00032	0.00801032	1	1	1
GO:0002718	regulation of cytokine production involved in immune response	19	62	0.00032	0.00801032	1	0.930622	1
GO:0001802	type III hypersensitivity	4	4	0.00035	0.00843478	1	1	1
GO:0001803	regulation of type III hypersensitivity	4	4	0.00035	0.00843478	1	1	1
GO:0001805	positive regulation of type III hypersensitivity	4	4	0.00035	0.00843478	1	0.0754444	1
GO:0002679	respiratory burst involved in defense response	4	4	0.00035	0.00843478	1	0.591387	1
GO:0090634	microglial cell mediated cytotoxicity	4	4	0.00035	0.00843478	1	0.769029	1
GO:0001775	cell activation	69	360	0.00036	0.00862222	1	1	1
GO:0019221	cytokine-mediated signaling pathway	47	220	0.00039	0.00928344	1	0.895296	1
GO:0002705	positive regulation of leukocyte mediated immunity	20	68	0.00041	0.0097	1	0.769029	1
GO:0039531	regulation of cytoplasmic pattern recognition receptor signaling pathway	12	31	0.00042	0.00987636	1	0.895296	1
GO:0002429	immune response-activating cell surface receptor signaling pathway	26	100	0.00049	0.0113844	1	1	1
GO:0002832	negative regulation of response to biotic stimulus	13	36	0.00053	0.0116841	1	1	1
GO:0002690	positive regulation of leukocyte chemotaxis	15	45	0.00053	0.0116841	1	0.898016	1
GO:0002474	antigen processing and presentation of peptide antigen via MHC class I	8	16	0.00053	0.0116841	1	1	1
GO:0032727	positive regulation of interferon-alpha production	8	16	0.00053	0.0116841	1	0.10282	1
GO:0048245	eosinophil chemotaxis	8	16	0.00053	0.0116841	1	0.10282	1
GO:0140632	canonical inflammasome complex assembly	8	16	0.00053	0.0116841	1	1	1
GO:0141085	regulation of inflammasome-mediated signaling pathway	8	16	0.00053	0.0116841	1	0.769029	1
GO:0002460	adaptive immune response based on somatic recombination of immune receptors built from immunoglobulin superfamily domains	34	146	0.0006	0.0131525	1	0.980071	1
GO:0001818	negative regulation of cytokine production	25	96	0.00062	0.0134391	1	0.769029	1
GO:0002367	cytokine production involved in immune response	21	75	0.00062	0.0134391	1	1	1
GO:0045069	regulation of viral genome replication	11	28	0.00063	0.01358	1	1	1
GO:1905521	regulation of macrophage migration	10	24	0.00065	0.0138571	1	0.769029	1
GO:0060627	regulation of vesicle-mediated transport	30	124	0.00067	0.0142055	1	1	1
GO:0032693	negative regulation of interleukin-10 production	7	13	0.00069	0.0144714	1	0.127486	1
GO:0045807	positive regulation of endocytosis	17	56	0.00077	0.015845	1	1	1
GO:0001794	type IIa hypersensitivity	5	7	0.00078	0.015845	1	1	1
GO:0002445	type II hypersensitivity	5	7	0.00078	0.015845	1	1	1
GO:0060263	regulation of respiratory burst	5	7	0.00078	0.015845	1	0.603716	1
GO:0019079	viral genome replication	12	33	0.00081	0.0162	1	1	1
GO:0032608	interferon-beta production	12	33	0.00081	0.0162	1	1	1
GO:0032648	regulation of interferon-beta production	12	33	0.00081	0.0162	1	1	1
GO:0032490	detection of molecule of bacterial origin	6	10	0.00082	0.0163159	1	1	1
GO:0002455	humoral immune response mediated by circulating immunoglobulin	8	17	0.00089	0.017095	1	1	1
GO:0032607	interferon-alpha production	8	17	0.00089	0.017095	1	1	1
GO:0032647	regulation of interferon-alpha production	8	17	0.00089	0.017095	1	1	1
GO:0072677	eosinophil migration	8	17	0.00089	0.017095	1	1	1
GO:0090594	inflammatory response to wounding	8	17	0.00089	0.017095	1	1	1
GO:0045824	negative regulation of innate immune response	11	29	0.0009	0.017202	1	0.895296	1
GO:0050920	regulation of chemotaxis	19	67	0.00097	0.018359	1	1	1
GO:0050921	positive regulation of chemotaxis	17	57	0.00097	0.018359	1	0.895296	1
GO:0002685	regulation of leukocyte migration	23	88	0.00099	0.0186466	1	1	1
GO:0030100	regulation of endocytosis	23	89	0.00117	0.0217206	1	1	1
GO:0002262	myeloid cell homeostasis	17	58	0.00121	0.0222235	1	1	1
GO:0033993	response to lipid	46	224	0.00121	0.0222235	1	1	1
GO:0002577	regulation of antigen processing and presentation	7	14	0.00122	0.0222235	1	0.591387	1
GO:1900225	regulation of NLRP3 inflammasome complex assembly	7	14	0.00122	0.0222235	1	0.769029	1
GO:0034340	response to type I interferon	13	39	0.00127	0.0230262	1	0.769029	1
GO:0042119	neutrophil activation	9	22	0.00144	0.0259263	1	0.591387	1
GO:1990868	response to chemokine	15	49	0.00145	0.0259263	1	1	1
GO:1990869	cellular response to chemokine	15	49	0.00145	0.0259263	1	1	1
GO:0002282	microglial cell activation involved in immune response	4	5	0.00156	0.0268226	1	0.195252	1
GO:0016068	type I hypersensitivity	4	5	0.00156	0.0268226	1	0.769029	1
GO:0032741	positive regulation of interleukin-18 production	4	5	0.00156	0.0268226	1	0.195252	1
GO:0002524	hypersensitivity	6	11	0.00159	0.0268226	1	1	1
GO:0010818	T cell chemotaxis	6	11	0.00159	0.0268226	1	0.769029	1
GO:0072567	chemokine (C-X-C motif) ligand 2 production	6	11	0.00159	0.0268226	1	1	1
GO:0141087	positive regulation of inflammasome-mediated signaling pathway	6	11	0.00159	0.0268226	1	1	1
GO:1901623	regulation of lymphocyte chemotaxis	6	11	0.00159	0.0268226	1	0.959826	1
GO:0002819	regulation of adaptive immune response	24	97	0.00178	0.0298978	1	0.769029	1
GO:0050866	negative regulation of cell activation	18	65	0.00179	0.0299083	1	0.784135	1
GO:0031341	regulation of cell killing	15	50	0.00183	0.0299083	1	0.959127	1
GO:0002695	negative regulation of leukocyte activation	17	60	0.00183	0.0299083	1	0.873285	1
GO:0045637	regulation of myeloid cell differentiation	17	60	0.00183	0.0299083	1	0.959826	1
GO:0006958	complement activation, classical pathway	5	8	0.00185	0.0299083	1	0.224312	1
GO:0032621	interleukin-18 production	5	8	0.00185	0.0299083	1	0.959826	1
GO:0036005	response to macrophage colony-stimulating factor	5	8	0.00185	0.0299083	1	1	1
GO:0050792	regulation of viral process	16	55	0.00185	0.0299083	1	1	1
GO:0007166	cell surface receptor signaling pathway	94	554	0.00193	0.0310722	1	1	1
GO:0060337	type I interferon-mediated signaling pathway	12	36	0.00196	0.0312955	1	0.769029	1
GO:0071357	cellular response to type I interferon	12	36	0.00196	0.0312955	1	0.769029	1
GO:0009593	detection of chemical stimulus	7	15	0.00203	0.0321486	1	0.959826	1
GO:0090025	regulation of monocyte chemotaxis	7	15	0.00203	0.0321486	1	0.895296	1
GO:0002712	regulation of B cell mediated immunity	9	23	0.00209	0.0328308	1	0.959826	1
GO:0002889	regulation of immunoglobulin mediated immune response	9	23	0.00209	0.0328308	1	0.959826	1
GO:0071674	mononuclear cell migration	21	82	0.00221	0.0345758	1	1	1
GO:1903900	regulation of viral life cycle	14	46	0.00224	0.0349044	1	1	1
GO:0050896	response to stimulus	154	1036	0.00236	0.0366272	1	1	1
GO:0046649	lymphocyte activation	54	282	0.0024	0.0370996	1	0.959826	1
GO:0019730	antimicrobial humoral response	12	37	0.00256	0.0382054	1	1	1
GO:0002536	respiratory burst involved in inflammatory response	3	3	0.00257	0.0382054	1	0.769029	1
GO:0002586	regulation of antigen processing and presentation of peptide antigen via MHC class II	3	3	0.00257	0.0382054	1	0.769029	1
GO:0034239	regulation of macrophage fusion	3	3	0.00257	0.0382054	1	0.769029	1
GO:0071725	response to triacyl bacterial lipopeptide	3	3	0.00257	0.0382054	1	1	1
GO:1904151	positive regulation of microglial cell mediated cytotoxicity	3	3	0.00257	0.0382054	1	0.276989	1
GO:0001910	regulation of leukocyte mediated cytotoxicity	13	42	0.00273	0.0401227	1	0.768969	1
GO:0002761	regulation of myeloid leukocyte differentiation	13	42	0.00273	0.0401227	1	1	1
GO:0002440	production of molecular mediator of immune response	27	117	0.00278	0.0407034	1	1	1
GO:0050829	defense response to Gram-negative bacterium	9	24	0.00295	0.0425502	1	0.309351	1
GO:0072678	T cell migration	9	24	0.00295	0.0425502	1	0.769029	1
GO:0002279	mast cell activation involved in immune response	8	20	0.00318	0.045008	1	1	1
GO:0043300	regulation of leukocyte degranulation	8	20	0.00318	0.045008	1	1	1
GO:0008347	glial cell migration	7	16	0.00319	0.045008	1	1	1
GO:0009595	detection of biotic stimulus	7	16	0.00319	0.045008	1	1	1
GO:0010758	regulation of macrophage chemotaxis	7	16	0.00319	0.045008	1	0.959826	1
GO:0006887	exocytosis	16	58	0.0034	0.0477646	1	0.959826	1
GO:0071396	cellular response to lipid	31	142	0.00341	0.0477646	1	1	1
GO:0140888	interferon-mediated signaling pathway	13	43	0.00345	0.0481511	1	0.769029	1
GO:0001959	regulation of cytokine-mediated signaling pathway	15	53	0.00347	0.0482566	1	0.769029	1
GO:0002283	neutrophil activation involved in immune response	5	9	0.0037	0.0510454	1	0.769029	1
GO:0060339	negative regulation of type I interferon-mediated signaling pathway	5	9	0.0037	0.0510454	1	0.368103	1
GO:0030335	positive regulation of cell migration	37	179	0.00371	0.0510454	1	1	1
GO:0002706	regulation of lymphocyte mediated immunity	20	80	0.00386	0.0529216	1	0.769029	1
GO:0002702	positive regulation of production of molecular mediator of immune response	17	64	0.00393	0.0536915	1	0.769029	1
GO:0141061	disruption of cell in another organism	11	34	0.00396	0.0537231	1	1	1
GO:1902106	negative regulation of leukocyte differentiation	9	25	0.00408	0.0551582	1	1	1
GO:0061760	antifungal innate immune response	4	6	0.00416	0.0552767	1	0.375367	1
GO:0002220	innate immune response activating cell surface receptor signaling pathway	12	39	0.0042	0.0556177	1	1	1
GO:0051250	negative regulation of lymphocyte activation	15	54	0.00424	0.0559565	1	0.895296	1
GO:0045055	regulated exocytosis	13	44	0.00431	0.0566875	1	1	1
GO:0000768	syncytium formation by plasma membrane fusion	8	21	0.00454	0.0585223	1	0.769029	1
GO:0006949	syncytium formation	8	21	0.00454	0.0585223	1	1	1
GO:0048247	lymphocyte chemotaxis	8	21	0.00454	0.0585223	1	0.895296	1
GO:0060907	positive regulation of macrophage cytokine production	8	21	0.00454	0.0585223	1	0.383872	1
GO:0140253	cell-cell fusion	8	21	0.00454	0.0585223	1	1	1
GO:0010759	positive regulation of macrophage chemotaxis	6	13	0.00465	0.0593487	1	0.383872	1
GO:0090026	positive regulation of monocyte chemotaxis	6	13	0.00465	0.0593487	1	0.383872	1
GO:0150146	cell junction disassembly	6	13	0.00465	0.0593487	1	1	1
GO:0014002	astrocyte development	7	17	0.0048	0.0608627	1	0.769029	1
GO:2000403	positive regulation of lymphocyte migration	7	17	0.0048	0.0608627	1	0.769029	1
GO:0040011	locomotion	55	297	0.00493	0.0623075	1	1	1
GO:0050670	regulation of lymphocyte proliferation	25	110	0.00504	0.063411	1	0.663624	1
GO:2000147	positive regulation of cell motility	37	182	0.00505	0.063411	1	1	1
GO:0141060	disruption of anatomical structure in another organism	11	35	0.0051	0.0638323	1	1	1
GO:0050864	regulation of B cell activation	15	55	0.00513	0.0640013	1	0.959826	1
GO:0002285	lymphocyte activation involved in immune response	20	82	0.00526	0.0652038	1	0.895296	1
GO:0070663	regulation of leukocyte proliferation	27	122	0.00526	0.0652038	1	1	1
GO:1903707	negative regulation of hemopoiesis	9	26	0.00551	0.0678692	1	1	1
GO:0030522	intracellular receptor signaling pathway	22	94	0.00589	0.0723203	1	1	1
GO:0001960	negative regulation of cytokine-mediated signaling pathway	8	22	0.0063	0.0768679	1	0.895296	1
GO:0060761	negative regulation of response to cytokine stimulus	8	22	0.0063	0.0768679	1	0.895296	1
GO:0031343	positive regulation of cell killing	11	36	0.00648	0.0783252	1	0.769029	1
GO:0070664	negative regulation of leukocyte proliferation	11	36	0.00648	0.0783252	1	0.769029	1
GO:0002291	T cell activation via T cell receptor contact with antigen bound to MHC molecule on antigen presenting cell	5	10	0.00657	0.0784357	1	0.504946	1
GO:0002883	regulation of hypersensitivity	5	10	0.00657	0.0784357	1	0.959826	1
GO:1900227	positive regulation of NLRP3 inflammasome complex assembly	5	10	0.00657	0.0784357	1	0.504946	1
GO:0061082	myeloid leukocyte cytokine production	12	41	0.0066	0.0785521	1	0.926737	1
GO:0070661	leukocyte proliferation	32	154	0.00666	0.0790239	1	0.959826	1
GO:0046651	lymphocyte proliferation	29	136	0.00675	0.0798476	1	1	1
GO:0035458	cellular response to interferon-beta	7	18	0.00696	0.0815855	1	0.504946	1
GO:0050832	defense response to fungus	7	18	0.00696	0.0815855	1	0.895296	1
GO:0060338	regulation of type I interferon-mediated signaling pathway	7	18	0.00696	0.0815855	1	0.959826	1
GO:0002281	macrophage activation involved in immune response	6	14	0.00722	0.0836227	1	0.959826	1
GO:0002335	mature B cell differentiation	6	14	0.00722	0.0836227	1	0.895296	1
GO:0061515	myeloid cell development	6	14	0.00722	0.0836227	1	0.773194	1
GO:0071404	cellular response to low-density lipoprotein particle stimulus	6	14	0.00722	0.0836227	1	0.504946	1
GO:0009620	response to fungus	9	27	0.0073	0.0840475	1	1	1
GO:0032944	regulation of mononuclear cell proliferation	25	113	0.00733	0.0841432	1	1	1
GO:0040017	positive regulation of locomotion	37	186	0.00746	0.0853829	1	1	1
GO:0016032	viral process	19	79	0.00767	0.0875282	1	1	1
GO:0002224	toll-like receptor signaling pathway	10	32	0.00788	0.089661	1	0.769029	1
GO:0048583	regulation of response to stimulus	108	678	0.00807	0.0915544	1	1	1
GO:0045639	positive regulation of myeloid cell differentiation	12	42	0.00815	0.0921924	1	0.769029	1
GO:0051240	positive regulation of multicellular organismal process	75	440	0.0083	0.0936163	1	1	1
GO:0002707	negative regulation of lymphocyte mediated immunity	8	23	0.00855	0.0961565	1	0.769029	1
GO:0002923	regulation of humoral immune response mediated by circulating immunoglobulin	4	7	0.00868	0.096777	1	0.769029	1
GO:0045671	negative regulation of osteoclast differentiation	4	7	0.00868	0.096777	1	0.504946	1
GO:0001812	positive regulation of type I hypersensitivity	3	4	0.00924	0.0971577	1	0.504946	1
GO:0002434	immune complex clearance	3	4	0.00924	0.0971577	1	0.504946	1
GO:0002580	regulation of antigen processing and presentation of peptide or polysaccharide antigen via MHC class II	3	4	0.00924	0.0971577	1	0.895296	1
GO:0002583	regulation of antigen processing and presentation of peptide antigen	3	4	0.00924	0.0971577	1	0.895296	1
GO:0010820	positive regulation of T cell chemotaxis	3	4	0.00924	0.0971577	1	0.504946	1
GO:0014005	microglia development	3	4	0.00924	0.0971577	1	0.504946	1
GO:0019835	cytolysis	3	4	0.00924	0.0971577	1	1	1
GO:0032497	detection of lipopolysaccharide	3	4	0.00924	0.0971577	1	0.504946	1
GO:0034154	toll-like receptor 7 signaling pathway	3	4	0.00924	0.0971577	1	0.504946	1
GO:0051715	cytolysis in another organism	3	4	0.00924	0.0971577	1	0.504946	1
GO:0071612	IP-10 production	3	4	0.00924	0.0971577	1	1	1
GO:0071658	regulation of IP-10 production	3	4	0.00924	0.0971577	1	1	1
GO:0140639	positive regulation of pyroptotic inflammatory response	3	4	0.00924	0.0971577	1	0.504946	1
GO:0150062	complement-mediated synapse pruning	3	4	0.00924	0.0971577	1	0.504946	1
GO:0150078	positive regulation of neuroinflammatory response	3	4	0.00924	0.0971577	1	0.504946	1
GO:1903969	regulation of response to macrophage colony-stimulating factor	3	4	0.00924	0.0971577	1	0.895296	1
GO:1903972	regulation of cellular response to macrophage colony-stimulating factor stimulus	3	4	0.00924	0.0971577	1	0.895296	1
GO:0051239	regulation of multicellular organismal process	93	570	0.00942	0.0987827	1	1	1
GO:0001961	positive regulation of cytokine-mediated signaling pathway	9	28	0.00951	0.0991903	1	0.769029	1
GO:0010935	regulation of macrophage cytokine production	9	28	0.00951	0.0991903	1	1	1
GO:0032651	regulation of interleukin-1 beta production	13	48	0.00968	0.100693	1	0.769029	1
GO:0002701	negative regulation of production of molecular mediator of immune response	7	19	0.00977	0.101087	1	0.769029	1
GO:0140894	endolysosomal toll-like receptor signaling pathway	7	19	0.00977	0.101087	1	0.895296	1
GO:0002720	positive regulation of cytokine production involved in immune response	12	43	0.00998	0.102543	1	0.959826	1
GO:0002437	inflammatory response to antigenic stimulus	10	33	0.00999	0.102543	1	1	1
GO:0050672	negative regulation of lymphocyte proliferation	10	33	0.00999	0.102543	1	0.769029	1
GO:0030316	osteoclast differentiation	11	38	0.01011	0.103501	1	1	1
GO:0032943	mononuclear cell proliferation	29	140	0.01039	0.106087	1	1	1
GO:2000145	regulation of cell motility	45	241	0.01055	0.1073	1	1	1
GO:0045638	negative regulation of myeloid cell differentiation	6	15	0.01069	0.1073	1	1	1
GO:0055094	response to lipoprotein particle	6	15	0.01069	0.1073	1	1	1
GO:2000404	regulation of T cell migration	6	15	0.01069	0.1073	1	0.895296	1
GO:0050865	regulation of cell activation	40	209	0.01072	0.1073	1	1	1
GO:0002864	regulation of acute inflammatory response to antigenic stimulus	5	11	0.01073	0.1073	1	1	1
GO:0032102	negative regulation of response to external stimulus	21	93	0.01099	0.109617	1	0.999192	1
GO:2000401	regulation of lymphocyte migration	8	24	0.01135	0.112918	1	0.976626	1
GO:0019058	viral life cycle	15	60	0.01218	0.120865	1	1	1
GO:0051249	regulation of lymphocyte activation	35	179	0.01243	0.122687	1	1	1
GO:0002694	regulation of leukocyte activation	38	198	0.01245	0.122687	1	1	1
GO:0002752	cell surface pattern recognition receptor signaling pathway	10	34	0.01249	0.122687	1	0.769029	1
GO:0032945	negative regulation of mononuclear cell proliferation	10	34	0.01249	0.122687	1	0.769029	1
GO:0030334	regulation of cell migration	44	237	0.01287	0.1261	1	1	1
GO:0002821	positive regulation of adaptive immune response	16	66	0.01317	0.128714	1	0.769029	1
GO:0002673	regulation of acute inflammatory response	7	20	0.01332	0.128882	1	0.895296	1
GO:0002714	positive regulation of B cell mediated immunity	7	20	0.01332	0.128882	1	0.895296	1
GO:0002891	positive regulation of immunoglobulin mediated immune response	7	20	0.01332	0.128882	1	0.895296	1
GO:0048870	cell motility	57	324	0.01371	0.132325	1	1	1
GO:0001776	leukocyte homeostasis	15	61	0.01424	0.1371	1	0.976626	1
GO:0071622	regulation of granulocyte chemotaxis	8	25	0.01478	0.141931	1	1	1
GO:0010628	positive regulation of gene expression	58	332	0.01493	0.141931	1	1	1
GO:0002532	production of molecular mediator involved in inflammatory response	11	40	0.01513	0.141931	1	0.769029	1
GO:0002438	acute inflammatory response to antigenic stimulus	6	16	0.01518	0.141931	1	1	1
GO:0002675	positive regulation of acute inflammatory response	6	16	0.01518	0.141931	1	0.959826	1
GO:0001912	positive regulation of leukocyte mediated cytotoxicity	9	30	0.0154	0.141931	1	0.784575	1
GO:0002763	positive regulation of myeloid leukocyte differentiation	9	30	0.0154	0.141931	1	0.895296	1
GO:0016477	cell migration	56	319	0.01545	0.141931	1	1	1
GO:0050830	defense response to Gram-positive bacterium	10	35	0.01545	0.141931	1	0.591387	1
GO:0002866	positive regulation of acute inflammatory response to antigenic stimulus	4	8	0.01551	0.141931	1	1	1
GO:0002885	positive regulation of hypersensitivity	4	8	0.01551	0.141931	1	1	1
GO:0032627	interleukin-23 production	4	8	0.01551	0.141931	1	1	1
GO:0038093	Fc receptor signaling pathway	4	8	0.01551	0.141931	1	1	1
GO:0140131	positive regulation of lymphocyte chemotaxis	4	8	0.01551	0.141931	1	1	1
GO:1903306	negative regulation of regulated secretory pathway	4	8	0.01551	0.141931	1	1	1
GO:2000343	positive regulation of chemokine (C-X-C motif) ligand 2 production	4	8	0.01551	0.141931	1	0.591387	1
GO:0032414	positive regulation of ion transmembrane transporter activity	5	12	0.01637	0.148748	1	0.776751	1
GO:0050869	negative regulation of B cell activation	5	12	0.01637	0.148748	1	0.959826	1
GO:0060142	regulation of syncytium formation by plasma membrane fusion	5	12	0.01637	0.148748	1	0.776751	1
GO:0002822	regulation of adaptive immune response based on somatic recombination of immune receptors built from immunoglobulin superfamily domains	20	91	0.01758	0.155364	1	0.895296	1
GO:0033028	myeloid cell apoptotic process	7	21	0.01771	0.155364	1	1	1
GO:0050691	regulation of defense response to virus by host	7	21	0.01771	0.155364	1	1	1
GO:0040012	regulation of locomotion	45	248	0.01807	0.155364	1	1	1
GO:0002273	plasmacytoid dendritic cell differentiation	2	2	0.01887	0.155364	1	0.591387	1
GO:0002277	myeloid dendritic cell activation involved in immune response	2	2	0.01887	0.155364	1	0.591387	1
GO:0002373	plasmacytoid dendritic cell cytokine production	2	2	0.01887	0.155364	1	0.591387	1
GO:0002582	positive regulation of antigen processing and presentation of peptide or polysaccharide antigen via MHC class II	2	2	0.01887	0.155364	1	1	1
GO:0002588	positive regulation of antigen processing and presentation of peptide antigen via MHC class II	2	2	0.01887	0.155364	1	0.591387	1
GO:0002644	negative regulation of tolerance induction	2	2	0.01887	0.155364	1	0.591387	1
GO:0002731	negative regulation of dendritic cell cytokine production	2	2	0.01887	0.155364	1	0.591387	1
GO:0030853	negative regulation of granulocyte differentiation	2	2	0.01887	0.155364	1	0.591387	1
GO:0033006	regulation of mast cell activation involved in immune response	2	2	0.01887	0.155364	1	1	1
GO:0033007	negative regulation of mast cell activation involved in immune response	2	2	0.01887	0.155364	1	0.591387	1
GO:0034241	positive regulation of macrophage fusion	2	2	0.01887	0.155364	1	0.591387	1
GO:0043315	positive regulation of neutrophil degranulation	2	2	0.01887	0.155364	1	0.591387	1
GO:0050859	negative regulation of B cell receptor signaling pathway	2	2	0.01887	0.155364	1	0.591387	1
GO:0060266	negative regulation of respiratory burst involved in inflammatory response	2	2	0.01887	0.155364	1	0.591387	1
GO:0060330	regulation of response to type II interferon	2	2	0.01887	0.155364	1	1	1
GO:0060332	positive regulation of response to type II interferon	2	2	0.01887	0.155364	1	1	1
GO:0060334	regulation of type II interferon-mediated signaling pathway	2	2	0.01887	0.155364	1	1	1
GO:0140973	positive regulation of AIM2 inflammasome complex assembly	2	2	0.01887	0.155364	1	0.591387	1
GO:0160006	Fc receptor-mediated immune complex endocytosis	2	2	0.01887	0.155364	1	0.591387	1
GO:1900246	positive regulation of RIG-I signaling pathway	2	2	0.01887	0.155364	1	0.591387	1
GO:1903971	positive regulation of response to macrophage colony-stimulating factor	2	2	0.01887	0.155364	1	1	1
GO:1903974	positive regulation of cellular response to macrophage colony-stimulating factor stimulus	2	2	0.01887	0.155364	1	0.591387	1
GO:2000342	negative regulation of chemokine (C-X-C motif) ligand 2 production	2	2	0.01887	0.155364	1	0.591387	1
GO:2000471	regulation of hematopoietic stem cell migration	2	2	0.01887	0.155364	1	1	1
GO:0010934	macrophage cytokine production	9	31	0.01919	0.157415	1	1	1
GO:0043270	positive regulation of monoatomic ion transport	13	52	0.01926	0.157656	1	0.769029	1
GO:0007186	G protein-coupled receptor signaling pathway	25	122	0.01985	0.162143	1	1	1
GO:0001796	regulation of type IIa hypersensitivity	3	5	0.02077	0.164033	1	1	1
GO:0002835	negative regulation of response to tumor cell	3	5	0.02077	0.164033	1	1	1
GO:0002838	negative regulation of immune response to tumor cell	3	5	0.02077	0.164033	1	0.603716	1
GO:0002892	regulation of type II hypersensitivity	3	5	0.02077	0.164033	1	1	1
GO:0002894	positive regulation of type II hypersensitivity	3	5	0.02077	0.164033	1	1	1
GO:0035747	natural killer cell chemotaxis	3	5	0.02077	0.164033	1	1	1
GO:0036314	response to sterol	3	5	0.02077	0.164033	1	1	1
GO:0043313	regulation of neutrophil degranulation	3	5	0.02077	0.164033	1	0.959826	1
GO:0050860	negative regulation of T cell receptor signaling pathway	3	5	0.02077	0.164033	1	0.603716	1
GO:0110088	hippocampal neuron apoptotic process	3	5	0.02077	0.164033	1	1	1
GO:0140970	AIM2 inflammasome complex assembly	3	5	0.02077	0.164033	1	0.959826	1
GO:2000427	positive regulation of apoptotic cell clearance	3	5	0.02077	0.164033	1	0.603716	1
GO:0032612	interleukin-1 production	14	58	0.0208	0.164033	1	1	1
GO:0045672	positive regulation of osteoclast differentiation	6	17	0.02085	0.164093	1	0.603716	1
GO:0032637	interleukin-8 production	11	42	0.02184	0.17119	1	1	1
GO:0032677	regulation of interleukin-8 production	11	42	0.02184	0.17119	1	1	1
GO:0042110	T cell activation	40	218	0.02207	0.172644	1	0.949074	1
GO:0042113	B cell activation	21	99	0.02233	0.174327	1	1	1
GO:0072676	lymphocyte migration	10	37	0.02289	0.17834	1	1	1
GO:0002820	negative regulation of adaptive immune response	7	22	0.02304	0.178434	1	0.769029	1
GO:0002823	negative regulation of adaptive immune response based on somatic recombination of immune receptors built from immunoglobulin superfamily domains	7	22	0.02304	0.178434	1	0.769029	1
GO:1902622	regulation of neutrophil migration	7	22	0.02304	0.178434	1	0.959826	1
GO:0032411	positive regulation of transporter activity	5	13	0.0237	0.182706	1	0.895296	1
GO:0048143	astrocyte activation	5	13	0.0237	0.182706	1	0.895296	1
GO:0006801	superoxide metabolic process	8	27	0.02378	0.182706	1	1	1
GO:1903305	regulation of regulated secretory pathway	8	27	0.02378	0.182706	1	1	1
GO:0001781	neutrophil apoptotic process	4	9	0.02496	0.188048	1	0.686843	1
GO:0002579	positive regulation of antigen processing and presentation	4	9	0.02496	0.188048	1	0.895296	1
GO:0050922	negative regulation of chemotaxis	4	9	0.02496	0.188048	1	0.686843	1
GO:0070304	positive regulation of stress-activated protein kinase signaling cascade	4	9	0.02496	0.188048	1	1	1
GO:0070391	response to lipoteichoic acid	4	9	0.02496	0.188048	1	1	1
GO:0071223	cellular response to lipoteichoic acid	4	9	0.02496	0.188048	1	0.686843	1
GO:0071639	positive regulation of monocyte chemotactic protein-1 production	4	9	0.02496	0.188048	1	0.686843	1
GO:1903975	regulation of glial cell migration	4	9	0.02496	0.188048	1	0.959826	1
GO:0048518	positive regulation of biological process	129	858	0.02553	0.19197	1	1	1
GO:0050868	negative regulation of T cell activation	11	43	0.02591	0.19445	1	0.868567	1
GO:1903706	regulation of hemopoiesis	26	131	0.02616	0.195947	1	1	1
GO:0006873	intracellular monoatomic ion homeostasis	19	89	0.02756	0.205773	1	0.769029	1
GO:0002448	mast cell mediated immunity	6	18	0.02779	0.205773	1	1	1
GO:0002861	regulation of inflammatory response to antigenic stimulus	6	18	0.02779	0.205773	1	1	1
GO:0006925	inflammatory cell apoptotic process	6	18	0.02779	0.205773	1	0.959826	1
GO:0043303	mast cell degranulation	6	18	0.02779	0.205773	1	0.748786	1
GO:0140895	cell surface toll-like receptor signaling pathway	9	33	0.02872	0.211449	1	0.758052	1
GO:0033627	cell adhesion mediated by integrin	7	23	0.02937	0.215417	1	0.768969	1
GO:0031348	negative regulation of defense response	16	72	0.02965	0.21706	1	1	1
GO:0048872	homeostasis of number of cells	23	114	0.0301	0.21994	1	1	1
GO:0032652	regulation of interleukin-1 production	13	55	0.03022	0.220402	1	0.959826	1
GO:0051241	negative regulation of multicellular organismal process	44	249	0.03082	0.224356	1	1	1
GO:0050789	regulation of biological process	153	1057	0.03094	0.224807	1	1	1
GO:0048871	multicellular organismal-level homeostasis	36	197	0.03201	0.232147	1	1	1
GO:0002526	acute inflammatory response	10	39	0.03264	0.236275	1	1	1
GO:0002719	negative regulation of cytokine production involved in immune response	5	14	0.03285	0.236471	1	0.895296	1
GO:0007252	I-kappaB phosphorylation	5	14	0.03285	0.236471	1	0.769029	1
GO:0070542	response to fatty acid	5	14	0.03285	0.236471	1	0.769029	1
GO:2000107	negative regulation of leukocyte apoptotic process	9	34	0.03457	0.248392	1	0.919621	1
GO:0002637	regulation of immunoglobulin production	8	29	0.03607	0.257153	1	0.769029	1
GO:0032412	regulation of monoatomic ion transmembrane transporter activity	6	19	0.0361	0.257153	1	0.895296	1
GO:1902624	positive regulation of neutrophil migration	6	19	0.0361	0.257153	1	0.769029	1
GO:1902105	regulation of leukocyte differentiation	23	116	0.03636	0.257153	1	1	1
GO:0050853	B cell receptor signaling pathway	7	24	0.03679	0.257153	1	0.87719	1
GO:0006910	phagocytosis, recognition	4	10	0.03722	0.257153	1	0.769029	1
GO:0071605	monocyte chemotactic protein-1 production	4	10	0.03722	0.257153	1	1	1
GO:0071637	regulation of monocyte chemotactic protein-1 production	4	10	0.03722	0.257153	1	1	1
GO:0001820	serotonin secretion	3	6	0.03738	0.257153	1	0.769029	1
GO:0002223	stimulatory C-type lectin receptor signaling pathway	3	6	0.03738	0.257153	1	0.769029	1
GO:0002399	MHC class II protein complex assembly	3	6	0.03738	0.257153	1	1	1
GO:0002503	peptide antigen assembly with MHC class II protein complex	3	6	0.03738	0.257153	1	0.769029	1
GO:0032493	response to bacterial lipoprotein	3	6	0.03738	0.257153	1	1	1
GO:0034162	toll-like receptor 9 signaling pathway	3	6	0.03738	0.257153	1	0.769029	1
GO:0039529	RIG-I signaling pathway	3	6	0.03738	0.257153	1	1	1
GO:0043129	surfactant homeostasis	3	6	0.03738	0.257153	1	0.769029	1
GO:0043312	neutrophil degranulation	3	6	0.03738	0.257153	1	1	1
GO:0070339	response to bacterial lipopeptide	3	6	0.03738	0.257153	1	1	1
GO:0071220	cellular response to bacterial lipoprotein	3	6	0.03738	0.257153	1	1	1
GO:0071221	cellular response to bacterial lipopeptide	3	6	0.03738	0.257153	1	1	1
GO:1903977	positive regulation of glial cell migration	3	6	0.03738	0.257153	1	0.769029	1
GO:1990840	response to lectin	3	6	0.03738	0.257153	1	1	1
GO:1990858	cellular response to lectin	3	6	0.03738	0.257153	1	1	1
GO:0070374	positive regulation of ERK1 and ERK2 cascade	12	51	0.03799	0.260887	1	0.769029	1
GO:0032731	positive regulation of interleukin-1 beta production	10	40	0.03848	0.26332	1	0.769029	1
GO:1901222	regulation of non-canonical NF-kappaB signal transduction	10	40	0.03848	0.26332	1	1	1
GO:0051049	regulation of transport	49	286	0.03858	0.263539	1	1	1
GO:0032879	regulation of localization	56	334	0.03946	0.269077	1	1	1
GO:0051251	positive regulation of lymphocyte activation	26	136	0.04062	0.276501	1	0.769029	1
GO:0031334	positive regulation of protein-containing complex assembly	14	63	0.0409	0.277919	1	1	1
GO:0050867	positive regulation of cell activation	28	149	0.0417	0.28286	1	1	1
GO:0050801	monoatomic ion homeostasis	19	93	0.04208	0.28494	1	1	1
GO:0042221	response to chemical	104	678	0.04287	0.289783	1	1	1
GO:0031663	lipopolysaccharide-mediated signaling pathway	8	30	0.04359	0.294138	1	0.769029	1
GO:0045620	negative regulation of lymphocyte differentiation	5	15	0.04394	0.294961	1	1	1
GO:0045646	regulation of erythrocyte differentiation	5	15	0.04394	0.294961	1	0.769029	1
GO:0030225	macrophage differentiation	7	25	0.04536	0.303967	1	0.959826	1
GO:0032418	lysosome localization	6	20	0.04586	0.305209	1	1	1
GO:0033032	regulation of myeloid cell apoptotic process	6	20	0.04586	0.305209	1	0.769029	1
GO:0070229	negative regulation of lymphocyte apoptotic process	6	20	0.04586	0.305209	1	1	1
GO:1990849	vacuolar localization	6	20	0.04586	0.305209	1	1	1
GO:0030003	intracellular monoatomic cation homeostasis	18	88	0.04686	0.31133	1	0.769029	1
GO:0030099	myeloid cell differentiation	23	119	0.04753	0.313015	1	1	1
GO:1903038	negative regulation of leukocyte cell-cell adhesion	11	47	0.0478	0.313015	1	0.896067	1
GO:0030888	regulation of B cell proliferation	9	36	0.04861	0.313015	1	0.959826	1
GO:0006898	receptor-mediated endocytosis	12	53	0.04978	0.313015	1	0.776269	1
GO:0030183	B cell differentiation	12	53	0.04978	0.313015	1	1	1
GO:0002696	positive regulation of leukocyte activation	27	145	0.05027	0.313015	1	1	1
GO:0002248	connective tissue replacement involved in inflammatory response wound healing	2	3	0.05147	0.313015	1	0.769029	1
GO:0002249	lymphocyte anergy	2	3	0.05147	0.313015	1	0.769029	1
GO:0002361	CD4-positive, CD25-positive, alpha-beta regulatory T cell differentiation	2	3	0.05147	0.313015	1	1	1
GO:0002436	immune complex clearance by monocytes and macrophages	2	3	0.05147	0.313015	1	0.769029	1
GO:0002485	antigen processing and presentation of endogenous peptide antigen via MHC class I via ER pathway, TAP-dependent	2	3	0.05147	0.313015	1	0.769029	1
GO:0002585	positive regulation of antigen processing and presentation of peptide antigen	2	3	0.05147	0.313015	1	1	1
GO:0002667	regulation of T cell anergy	2	3	0.05147	0.313015	1	0.769029	1
GO:0002713	negative regulation of B cell mediated immunity	2	3	0.05147	0.313015	1	1	1
GO:0002841	negative regulation of T cell mediated immune response to tumor cell	2	3	0.05147	0.313015	1	0.769029	1
GO:0002870	T cell anergy	2	3	0.05147	0.313015	1	0.769029	1
GO:0002890	negative regulation of immunoglobulin mediated immune response	2	3	0.05147	0.313015	1	1	1
GO:0002911	regulation of lymphocyte anergy	2	3	0.05147	0.313015	1	0.769029	1
GO:0006026	aminoglycan catabolic process	2	3	0.05147	0.313015	1	1	1
GO:0006027	glycosaminoglycan catabolic process	2	3	0.05147	0.313015	1	1	1
GO:0007231	osmosensory signaling pathway	2	3	0.05147	0.313015	1	0.769029	1
GO:0007250	activation of NF-kappaB-inducing kinase activity	2	3	0.05147	0.313015	1	0.769029	1
GO:0014808	release of sequestered calcium ion into cytosol by sarcoplasmic reticulum	2	3	0.05147	0.313015	1	0.769029	1
GO:0030852	regulation of granulocyte differentiation	2	3	0.05147	0.313015	1	1	1
GO:0032897	negative regulation of viral transcription	2	3	0.05147	0.313015	1	0.769029	1
GO:0033632	regulation of cell-cell adhesion mediated by integrin	2	3	0.05147	0.313015	1	0.769029	1
GO:0033634	positive regulation of cell-cell adhesion mediated by integrin	2	3	0.05147	0.313015	1	0.769029	1
GO:0034163	regulation of toll-like receptor 9 signaling pathway	2	3	0.05147	0.313015	1	0.769029	1
GO:0034165	positive regulation of toll-like receptor 9 signaling pathway	2	3	0.05147	0.313015	1	0.769029	1
GO:0035563	positive regulation of chromatin binding	2	3	0.05147	0.313015	1	0.769029	1
GO:0035684	helper T cell extravasation	2	3	0.05147	0.313015	1	0.769029	1
GO:0035702	monocyte homeostasis	2	3	0.05147	0.313015	1	0.769029	1
GO:0038095	Fc-epsilon receptor signaling pathway	2	3	0.05147	0.313015	1	0.769029	1
GO:0038145	macrophage colony-stimulating factor signaling pathway	2	3	0.05147	0.313015	1	0.769029	1
GO:0039530	MDA-5 signaling pathway	2	3	0.05147	0.313015	1	0.769029	1
GO:0039535	regulation of RIG-I signaling pathway	2	3	0.05147	0.313015	1	1	1
GO:0042494	detection of bacterial lipoprotein	2	3	0.05147	0.313015	1	1	1
GO:0043305	negative regulation of mast cell degranulation	2	3	0.05147	0.313015	1	0.769029	1
GO:0044351	macropinocytosis	2	3	0.05147	0.313015	1	0.769029	1
GO:0044406	adhesion of symbiont to host	2	3	0.05147	0.313015	1	0.769029	1
GO:0060268	negative regulation of respiratory burst	2	3	0.05147	0.313015	1	1	1
GO:0060753	regulation of mast cell chemotaxis	2	3	0.05147	0.313015	1	0.769029	1
GO:0070296	sarcoplasmic reticulum calcium ion transport	2	3	0.05147	0.313015	1	0.769029	1
GO:0070340	detection of bacterial lipopeptide	2	3	0.05147	0.313015	1	1	1
GO:0071226	cellular response to molecule of fungal origin	2	3	0.05147	0.313015	1	0.769029	1
GO:0090264	regulation of immune complex clearance by monocytes and macrophages	2	3	0.05147	0.313015	1	0.769029	1
GO:0090265	positive regulation of immune complex clearance by monocytes and macrophages	2	3	0.05147	0.313015	1	0.769029	1
GO:0110091	negative regulation of hippocampal neuron apoptotic process	2	3	0.05147	0.313015	1	0.769029	1
GO:0140971	regulation of AIM2 inflammasome complex assembly	2	3	0.05147	0.313015	1	1	1
GO:0150064	vertebrate eye-specific patterning	2	3	0.05147	0.313015	1	0.769029	1
GO:1904464	regulation of matrix metallopeptidase secretion	2	3	0.05147	0.313015	1	0.769029	1
GO:1904466	positive regulation of matrix metallopeptidase secretion	2	3	0.05147	0.313015	1	0.769029	1
GO:1905956	positive regulation of endothelial tube morphogenesis	2	3	0.05147	0.313015	1	0.769029	1
GO:1990773	matrix metallopeptidase secretion	2	3	0.05147	0.313015	1	0.769029	1
GO:0002573	myeloid leukocyte differentiation	17	83	0.05218	0.314424	1	1	1
GO:0098771	inorganic ion homeostasis	17	83	0.05218	0.314424	1	0.769029	1
GO:0032729	positive regulation of type II interferon production	10	42	0.05224	0.314424	1	0.769029	1
GO:0001562	response to protozoan	4	11	0.05235	0.314424	1	0.769029	1
GO:0002313	mature B cell differentiation involved in immune response	4	11	0.05235	0.314424	1	1	1
GO:0002523	leukocyte migration involved in inflammatory response	4	11	0.05235	0.314424	1	0.769029	1
GO:0034134	toll-like receptor 2 signaling pathway	4	11	0.05235	0.314424	1	0.769029	1
GO:0042832	defense response to protozoan	4	11	0.05235	0.314424	1	0.769029	1
GO:0050688	regulation of defense response to virus	7	26	0.05511	0.33049	1	1	1
GO:2000379	positive regulation of reactive oxygen species metabolic process	9	37	0.05687	0.3346	1	0.769029	1
GO:0002446	neutrophil mediated immunity	5	16	0.05701	0.3346	1	0.959826	1
GO:0010574	regulation of vascular endothelial growth factor production	5	16	0.05701	0.3346	1	0.769029	1
GO:0032715	negative regulation of interleukin-6 production	5	16	0.05701	0.3346	1	0.769029	1
GO:0032930	positive regulation of superoxide anion generation	5	16	0.05701	0.3346	1	0.769029	1
GO:1903901	negative regulation of viral life cycle	5	16	0.05701	0.3346	1	0.769029	1
GO:0010721	negative regulation of cell development	13	60	0.0576	0.3346	1	1	1
GO:0001878	response to yeast	3	7	0.0589	0.3346	1	0.769029	1
GO:0002396	MHC protein complex assembly	3	7	0.0589	0.3346	1	1	1
GO:0002501	peptide antigen assembly with MHC protein complex	3	7	0.0589	0.3346	1	1	1
GO:0002638	negative regulation of immunoglobulin production	3	7	0.0589	0.3346	1	0.769029	1
GO:0002732	positive regulation of dendritic cell cytokine production	3	7	0.0589	0.3346	1	0.769029	1
GO:0003159	morphogenesis of an endothelium	3	7	0.0589	0.3346	1	1	1
GO:0006837	serotonin transport	3	7	0.0589	0.3346	1	1	1
GO:0010755	regulation of plasminogen activation	3	7	0.0589	0.3346	1	0.769029	1
GO:0030277	maintenance of gastrointestinal epithelium	3	7	0.0589	0.3346	1	0.769029	1
GO:0031639	plasminogen activation	3	7	0.0589	0.3346	1	0.769029	1
GO:0032691	negative regulation of interleukin-1 beta production	3	7	0.0589	0.3346	1	0.769029	1
GO:0032700	negative regulation of interleukin-17 production	3	7	0.0589	0.3346	1	0.769029	1
GO:0033003	regulation of mast cell activation	3	7	0.0589	0.3346	1	1	1
GO:0038110	interleukin-2-mediated signaling pathway	3	7	0.0589	0.3346	1	0.769029	1
GO:0038113	interleukin-9-mediated signaling pathway	3	7	0.0589	0.3346	1	0.769029	1
GO:0045342	MHC class II biosynthetic process	3	7	0.0589	0.3346	1	0.769029	1
GO:0060099	regulation of phagocytosis, engulfment	3	7	0.0589	0.3346	1	0.769029	1
GO:0060100	positive regulation of phagocytosis, engulfment	3	7	0.0589	0.3346	1	0.769029	1
GO:0061154	endothelial tube morphogenesis	3	7	0.0589	0.3346	1	1	1
GO:0071104	response to interleukin-9	3	7	0.0589	0.3346	1	0.769029	1
GO:0071352	cellular response to interleukin-2	3	7	0.0589	0.3346	1	0.769029	1
GO:0071355	cellular response to interleukin-9	3	7	0.0589	0.3346	1	0.769029	1
GO:0072683	T cell extravasation	3	7	0.0589	0.3346	1	0.769029	1
GO:0098543	detection of other organism	3	7	0.0589	0.3346	1	1	1
GO:1900016	negative regulation of cytokine production involved in inflammatory response	3	7	0.0589	0.3346	1	0.769029	1
GO:1905153	regulation of membrane invagination	3	7	0.0589	0.3346	1	0.769029	1
GO:1905155	positive regulation of membrane invagination	3	7	0.0589	0.3346	1	0.769029	1
GO:2000425	regulation of apoptotic cell clearance	3	7	0.0589	0.3346	1	1	1
GO:2001259	positive regulation of cation channel activity	3	7	0.0589	0.3346	1	0.769029	1
GO:0021782	glial cell development	10	43	0.06022	0.3411	1	1	1
GO:0032732	positive regulation of interleukin-1 production	10	43	0.06022	0.3411	1	1	1
GO:0042098	T cell proliferation	20	103	0.06034	0.341282	1	0.769029	1
GO:0043254	regulation of protein-containing complex assembly	19	97	0.06154	0.345719	1	0.966398	1
GO:0034767	positive regulation of monoatomic ion transmembrane transport	8	32	0.06157	0.345719	1	0.895296	1
GO:0051209	release of sequestered calcium ion into cytosol	8	32	0.06157	0.345719	1	0.769029	1
GO:0051282	regulation of sequestering of calcium ion	8	32	0.06157	0.345719	1	0.769029	1
GO:0051283	negative regulation of sequestering of calcium ion	8	32	0.06157	0.345719	1	0.769029	1
GO:0007159	leukocyte cell-cell adhesion	27	148	0.06297	0.353069	1	0.88328	1
GO:0002824	positive regulation of adaptive immune response based on somatic recombination of immune receptors built from immunoglobulin superfamily domains	13	61	0.06463	0.361332	1	0.959826	1
GO:0044403	biological process involved in symbiotic interaction	13	61	0.06463	0.361332	1	0.769029	1
GO:0022409	positive regulation of cell-cell adhesion	23	123	0.06609	0.368963	1	0.769029	1
GO:0051234	establishment of localization	74	470	0.06674	0.372056	1	1	1
GO:0055080	monoatomic cation homeostasis	18	92	0.06859	0.381821	1	1	1
GO:0032604	granulocyte macrophage colony-stimulating factor production	4	12	0.07034	0.388221	1	0.769029	1
GO:0033033	negative regulation of myeloid cell apoptotic process	4	12	0.07034	0.388221	1	0.769029	1
GO:0033628	regulation of cell adhesion mediated by integrin	4	12	0.07034	0.388221	1	0.769029	1
GO:0051770	positive regulation of nitric-oxide synthase biosynthetic process	4	12	0.07034	0.388221	1	0.769029	1
GO:0060340	positive regulation of type I interferon-mediated signaling pathway	4	12	0.07034	0.388221	1	0.769029	1
GO:0150077	regulation of neuroinflammatory response	4	12	0.07034	0.388221	1	1	1
GO:0002708	positive regulation of lymphocyte mediated immunity	12	56	0.07182	0.393902	1	0.959826	1
GO:0051208	sequestering of calcium ion	8	33	0.07208	0.393902	1	0.769029	1
GO:0002507	tolerance induction	5	17	0.07208	0.393902	1	0.959826	1
GO:0032928	regulation of superoxide anion generation	5	17	0.07208	0.393902	1	0.769029	1
GO:0033273	response to vitamin	5	17	0.07208	0.393902	1	0.769029	1
GO:0045589	regulation of regulatory T cell differentiation	5	17	0.07208	0.393902	1	0.959826	1
GO:0050854	regulation of antigen receptor-mediated signaling pathway	5	17	0.07208	0.393902	1	1	1
GO:0051050	positive regulation of transport	34	196	0.07275	0.397004	1	1	1
GO:0048522	positive regulation of cellular process	120	810	0.0762	0.415247	1	1	1
GO:1901342	regulation of vasculature development	17	87	0.07647	0.416134	1	0.769029	1
GO:0065007	biological regulation	153	1070	0.07758	0.421583	1	1	1
GO:0034142	toll-like receptor 4 signaling pathway	7	28	0.07827	0.424145	1	0.769029	1
GO:0051702	biological process involved in interaction with symbiont	7	28	0.07827	0.424145	1	0.769029	1
GO:2000106	regulation of leukocyte apoptotic process	12	57	0.08039	0.435025	1	0.959826	1
GO:0018108	peptidyl-tyrosine phosphorylation	17	88	0.08356	0.447121	1	0.769029	1
GO:0018212	peptidyl-tyrosine modification	17	88	0.08356	0.447121	1	0.769029	1
GO:0022898	regulation of transmembrane transporter activity	6	23	0.08421	0.447121	1	0.959826	1
GO:2000108	positive regulation of leukocyte apoptotic process	6	23	0.08421	0.447121	1	0.769029	1
GO:0001660	fever generation	3	8	0.08493	0.447121	1	0.769029	1
GO:0002756	MyD88-independent toll-like receptor signaling pathway	3	8	0.08493	0.447121	1	0.769029	1
GO:0030851	granulocyte differentiation	3	8	0.08493	0.447121	1	1	1
GO:0031649	heat generation	3	8	0.08493	0.447121	1	0.769029	1
GO:0031664	regulation of lipopolysaccharide-mediated signaling pathway	3	8	0.08493	0.447121	1	0.769029	1
GO:0033029	regulation of neutrophil apoptotic process	3	8	0.08493	0.447121	1	0.769029	1
GO:0033630	positive regulation of cell adhesion mediated by integrin	3	8	0.08493	0.447121	1	0.769029	1
GO:0035457	cellular response to interferon-alpha	3	8	0.08493	0.447121	1	0.769029	1
GO:0043383	negative T cell selection	3	8	0.08493	0.447121	1	0.769029	1
GO:0044344	cellular response to fibroblast growth factor stimulus	3	8	0.08493	0.447121	1	0.769029	1
GO:0045059	positive thymic T cell selection	3	8	0.08493	0.447121	1	0.769029	1
GO:0045060	negative thymic T cell selection	3	8	0.08493	0.447121	1	0.769029	1
GO:0045591	positive regulation of regulatory T cell differentiation	3	8	0.08493	0.447121	1	0.769029	1
GO:0070669	response to interleukin-2	3	8	0.08493	0.447121	1	0.769029	1
GO:0071774	response to fibroblast growth factor	3	8	0.08493	0.447121	1	0.769029	1
GO:0140052	cellular response to oxidised low-density lipoprotein particle stimulus	3	8	0.08493	0.447121	1	0.769029	1
GO:0022407	regulation of cell-cell adhesion	28	159	0.08581	0.451142	1	0.895296	1
GO:0070371	ERK1 and ERK2 cascade	15	76	0.0868	0.455729	1	1	1
GO:0007162	negative regulation of cell adhesion	14	70	0.08808	0.460148	1	0.959826	1
GO:0010573	vascular endothelial growth factor production	5	18	0.08911	0.460148	1	0.769029	1
GO:0031100	animal organ regeneration	5	18	0.08911	0.460148	1	0.769029	1
GO:0043277	apoptotic cell clearance	5	18	0.08911	0.460148	1	1	1
GO:0045066	regulatory T cell differentiation	5	18	0.08911	0.460148	1	0.991553	1
GO:0032940	secretion by cell	25	140	0.0894	0.460148	1	1	1
GO:0001911	negative regulation of leukocyte mediated cytotoxicity	4	13	0.09108	0.460148	1	0.769029	1
GO:0002710	negative regulation of T cell mediated immunity	4	13	0.09108	0.460148	1	0.769029	1
GO:0002863	positive regulation of inflammatory response to antigenic stimulus	4	13	0.09108	0.460148	1	1	1
GO:0002902	regulation of B cell apoptotic process	4	13	0.09108	0.460148	1	1	1
GO:0032480	negative regulation of type I interferon production	4	13	0.09108	0.460148	1	0.769029	1
GO:0043124	negative regulation of canonical NF-kappaB signal transduction	4	13	0.09108	0.460148	1	0.769029	1
GO:0043304	regulation of mast cell degranulation	4	13	0.09108	0.460148	1	0.769029	1
GO:0045920	negative regulation of exocytosis	4	13	0.09108	0.460148	1	1	1
GO:1902041	regulation of extrinsic apoptotic signaling pathway via death domain receptors	4	13	0.09108	0.460148	1	0.769029	1
GO:0032663	regulation of interleukin-2 production	7	29	0.09169	0.460148	1	0.769029	1
GO:0009611	response to wounding	22	121	0.09221	0.460148	1	1	1
GO:0042129	regulation of T cell proliferation	16	83	0.09317	0.460148	1	0.769029	1
GO:0045765	regulation of angiogenesis	16	83	0.09317	0.460148	1	0.769029	1
GO:0002278	eosinophil activation involved in immune response	2	4	0.09369	0.460148	1	0.769029	1
GO:0002447	eosinophil mediated immunity	2	4	0.09369	0.460148	1	0.769029	1
GO:0002576	platelet degranulation	2	4	0.09369	0.460148	1	0.769029	1
GO:0002578	negative regulation of antigen processing and presentation	2	4	0.09369	0.460148	1	0.769029	1
GO:0002689	negative regulation of leukocyte chemotaxis	2	4	0.09369	0.460148	1	0.769029	1
GO:0002901	mature B cell apoptotic process	2	4	0.09369	0.460148	1	0.769029	1
GO:0002905	regulation of mature B cell apoptotic process	2	4	0.09369	0.460148	1	0.769029	1
GO:0002906	negative regulation of mature B cell apoptotic process	2	4	0.09369	0.460148	1	0.769029	1
GO:0002921	negative regulation of humoral immune response	2	4	0.09369	0.460148	1	1	1
GO:0006458	'de novo' protein folding	2	4	0.09369	0.460148	1	0.769029	1
GO:0033625	positive regulation of integrin activation	2	4	0.09369	0.460148	1	0.769029	1
GO:0034242	negative regulation of syncytium formation by plasma membrane fusion	2	4	0.09369	0.460148	1	0.769029	1
GO:0035425	autocrine signaling	2	4	0.09369	0.460148	1	0.769029	1
GO:0035697	CD8-positive, alpha-beta T cell extravasation	2	4	0.09369	0.460148	1	0.769029	1
GO:0043307	eosinophil activation	2	4	0.09369	0.460148	1	0.769029	1
GO:0043308	eosinophil degranulation	2	4	0.09369	0.460148	1	0.769029	1
GO:0045590	negative regulation of regulatory T cell differentiation	2	4	0.09369	0.460148	1	0.769029	1
GO:0046642	negative regulation of alpha-beta T cell proliferation	2	4	0.09369	0.460148	1	0.769029	1
GO:0050855	regulation of B cell receptor signaling pathway	2	4	0.09369	0.460148	1	1	1
GO:0051084	'de novo' post-translational protein folding	2	4	0.09369	0.460148	1	0.769029	1
GO:0051085	chaperone cofactor-dependent protein refolding	2	4	0.09369	0.460148	1	0.769029	1
GO:0060586	multicellular organismal-level iron ion homeostasis	2	4	0.09369	0.460148	1	0.769029	1
GO:0060729	intestinal epithelial structure maintenance	2	4	0.09369	0.460148	1	0.769029	1
GO:0070099	regulation of chemokine-mediated signaling pathway	2	4	0.09369	0.460148	1	0.769029	1
GO:0070493	thrombin-activated receptor signaling pathway	2	4	0.09369	0.460148	1	0.769029	1
GO:0071724	response to diacyl bacterial lipopeptide	2	4	0.09369	0.460148	1	0.769029	1
GO:0071726	cellular response to diacyl bacterial lipopeptide	2	4	0.09369	0.460148	1	0.769029	1
GO:0097709	connective tissue replacement	2	4	0.09369	0.460148	1	0.769029	1
GO:1903514	release of sequestered calcium ion into cytosol by endoplasmic reticulum	2	4	0.09369	0.460148	1	0.769029	1
GO:2000110	negative regulation of macrophage apoptotic process	2	4	0.09369	0.460148	1	0.769029	1
GO:2000503	positive regulation of natural killer cell chemotaxis	2	4	0.09369	0.460148	1	0.769029	1
GO:2000562	negative regulation of CD4-positive, alpha-beta T cell proliferation	2	4	0.09369	0.460148	1	0.769029	1
GO:0140352	export from cell	25	141	0.09566	0.46923	1	1	1
GO:0017157	regulation of exocytosis	8	35	0.09619	0.47064	1	1	1
GO:0051928	positive regulation of calcium ion transport	8	35	0.09619	0.47064	1	0.769029	1
GO:0043269	regulation of monoatomic ion transport	17	90	0.099	0.478063	1	0.895296	1
GO:0070665	positive regulation of leukocyte proliferation	17	90	0.099	0.478063	1	0.769029	1
GO:0002521	leukocyte differentiation	35	208	0.09938	0.478063	1	1	1
GO:0006874	intracellular calcium ion homeostasis	12	59	0.0994	0.478063	1	0.769029	1
GO:0022408	negative regulation of cell-cell adhesion	12	59	0.0994	0.478063	1	1	1
GO:0032649	regulation of type II interferon production	12	59	0.0994	0.478063	1	0.769029	1
GO:0050731	positive regulation of peptidyl-tyrosine phosphorylation	11	53	0.09996	0.478063	1	0.769029	1
GO:0032409	regulation of transporter activity	6	24	0.10002	0.478063	1	0.959826	1
GO:0098586	cellular response to virus	6	24	0.10002	0.478063	1	0.769029	1
GO:0050730	regulation of peptidyl-tyrosine phosphorylation	14	72	0.10618	0.478063	1	0.769029	1
GO:0002312	B cell activation involved in immune response	7	30	0.10633	0.478063	1	1	1
GO:0048708	astrocyte differentiation	7	30	0.10633	0.478063	1	1	1
GO:0050798	activated T cell proliferation	7	30	0.10633	0.478063	1	0.769029	1
GO:0050848	regulation of calcium-mediated signaling	7	30	0.10633	0.478063	1	0.769029	1
GO:0002639	positive regulation of immunoglobulin production	5	19	0.10804	0.478063	1	0.769029	1
GO:0051851	modulation by host of symbiont process	5	19	0.10804	0.478063	1	0.769029	1
GO:0008285	negative regulation of cell population proliferation	25	143	0.10901	0.478063	1	0.896067	1
GO:0006810	transport	70	453	0.10997	0.478063	1	1	1
GO:0050871	positive regulation of B cell activation	9	42	0.11136	0.478063	1	0.769029	1
GO:0030097	hemopoiesis	41	251	0.1121	0.478063	1	1	1
GO:0001783	B cell apoptotic process	4	14	0.11436	0.478063	1	1	1
GO:0034113	heterotypic cell-cell adhesion	4	14	0.11436	0.478063	1	0.769029	1
GO:0046597	negative regulation of viral entry into host cell	4	14	0.11436	0.478063	1	0.769029	1
GO:0051767	nitric-oxide synthase biosynthetic process	4	14	0.11436	0.478063	1	0.769029	1
GO:0051769	regulation of nitric-oxide synthase biosynthetic process	4	14	0.11436	0.478063	1	0.769029	1
GO:0071624	positive regulation of granulocyte chemotaxis	4	14	0.11436	0.478063	1	0.769029	1
GO:0090023	positive regulation of neutrophil chemotaxis	4	14	0.11436	0.478063	1	0.769029	1
GO:0097242	amyloid-beta clearance	4	14	0.11436	0.478063	1	0.769029	1
GO:0002483	antigen processing and presentation of endogenous peptide antigen	3	9	0.11492	0.478063	1	0.769029	1
GO:0002604	regulation of dendritic cell antigen processing and presentation	3	9	0.11492	0.478063	1	0.769029	1
GO:0002837	regulation of immune response to tumor cell	3	9	0.11492	0.478063	1	1	1
GO:0006612	protein targeting to membrane	3	9	0.11492	0.478063	1	0.769029	1
GO:0010669	epithelial structure maintenance	3	9	0.11492	0.478063	1	0.769029	1
GO:0019885	antigen processing and presentation of endogenous peptide antigen via MHC class I	3	9	0.11492	0.478063	1	0.769029	1
GO:0032682	negative regulation of chemokine production	3	9	0.11492	0.478063	1	1	1
GO:0032703	negative regulation of interleukin-2 production	3	9	0.11492	0.478063	1	0.769029	1
GO:0032967	positive regulation of collagen biosynthetic process	3	9	0.11492	0.478063	1	0.769029	1
GO:0034143	regulation of toll-like receptor 4 signaling pathway	3	9	0.11492	0.478063	1	0.769029	1
GO:0035723	interleukin-15-mediated signaling pathway	3	9	0.11492	0.478063	1	0.769029	1
GO:0060143	positive regulation of syncytium formation by plasma membrane fusion	3	9	0.11492	0.478063	1	1	1
GO:0060333	type II interferon-mediated signaling pathway	3	9	0.11492	0.478063	1	1	1
GO:0071350	cellular response to interleukin-15	3	9	0.11492	0.478063	1	0.769029	1
GO:1903428	positive regulation of reactive oxygen species biosynthetic process	3	9	0.11492	0.478063	1	0.769029	1
GO:1903131	mononuclear cell differentiation	31	184	0.11659	0.478063	1	1	1
GO:0042592	homeostatic process	49	307	0.11708	0.478063	1	1	1
GO:0008037	cell recognition	6	25	0.11728	0.478063	1	1	1
GO:0042130	negative regulation of T cell proliferation	6	25	0.11728	0.478063	1	0.769029	1
GO:0007165	signal transduction	118	805	0.11765	0.478063	1	1	1
GO:0071887	leukocyte apoptotic process	13	67	0.11861	0.478063	1	1	1
GO:1903037	regulation of leukocyte cell-cell adhesion	24	138	0.12053	0.478063	1	0.959826	1
GO:0055074	calcium ion homeostasis	12	61	0.12093	0.478063	1	0.769029	1
GO:0046903	secretion	27	158	0.12153	0.478063	1	1	1
GO:0051606	detection of stimulus	7	31	0.12216	0.478063	1	1	1
GO:0038061	non-canonical NF-kappaB signal transduction	11	55	0.12287	0.478063	1	1	1
GO:1904018	positive regulation of vasculature development	11	55	0.12287	0.478063	1	0.769029	1
GO:0050671	positive regulation of lymphocyte proliferation	15	80	0.12303	0.478063	1	0.769029	1
GO:0070228	regulation of lymphocyte apoptotic process	8	37	0.12438	0.478063	1	1	1
GO:0010557	positive regulation of macromolecule biosynthetic process	67	435	0.12572	0.478063	1	1	1
GO:0098609	cell-cell adhesion	34	206	0.12819	0.478063	1	0.90677	1
GO:0050863	regulation of T cell activation	24	139	0.12827	0.478063	1	1	1
GO:0032660	regulation of interleukin-17 production	5	20	0.12877	0.478063	1	0.769029	1
GO:0090322	regulation of superoxide metabolic process	5	20	0.12877	0.478063	1	0.769029	1
GO:0019722	calcium-mediated signaling	13	68	0.1296	0.478063	1	0.769029	1
GO:0070887	cellular response to chemical stimulus	67	437	0.13603	0.478063	1	1	1
GO:0010959	regulation of metal ion transport	14	75	0.13726	0.478063	1	0.769029	1
GO:0001811	negative regulation of type I hypersensitivity	1	1	0.13773	0.478063	1	0.769029	1
GO:0001879	detection of yeast	1	1	0.13773	0.478063	1	0.769029	1
GO:0002222	stimulatory killer cell immunoglobulin-like receptor signaling pathway	1	1	0.13773	0.478063	1	0.769029	1
GO:0002336	B-1 B cell lineage commitment	1	1	0.13773	0.478063	1	0.769029	1
GO:0002343	peripheral B cell selection	1	1	0.13773	0.478063	1	0.769029	1
GO:0002344	B cell affinity maturation	1	1	0.13773	0.478063	1	0.769029	1
GO:0002362	CD4-positive, CD25-positive, alpha-beta regulatory T cell lineage commitment	1	1	0.13773	0.478063	1	0.769029	1
GO:0002410	plasmacytoid dendritic cell chemotaxis	1	1	0.13773	0.478063	1	0.769029	1
GO:0002462	tolerance induction to nonself antigen	1	1	0.13773	0.478063	1	0.769029	1
GO:0002537	nitric oxide production involved in inflammatory response	1	1	0.13773	0.478063	1	0.769029	1
GO:0002545	chronic inflammatory response to non-antigenic stimulus	1	1	0.13773	0.478063	1	0.769029	1
GO:0002584	negative regulation of antigen processing and presentation of peptide antigen	1	1	0.13773	0.478063	1	0.769029	1
GO:0002587	negative regulation of antigen processing and presentation of peptide antigen via MHC class II	1	1	0.13773	0.478063	1	0.769029	1
GO:0002625	regulation of T cell antigen processing and presentation	1	1	0.13773	0.478063	1	0.769029	1
GO:0002665	negative regulation of T cell tolerance induction	1	1	0.13773	0.478063	1	0.769029	1
GO:0002668	negative regulation of T cell anergy	1	1	0.13773	0.478063	1	0.769029	1
GO:0002677	negative regulation of chronic inflammatory response	1	1	0.13773	0.478063	1	0.769029	1
GO:0002736	regulation of plasmacytoid dendritic cell cytokine production	1	1	0.13773	0.478063	1	0.769029	1
GO:0002737	negative regulation of plasmacytoid dendritic cell cytokine production	1	1	0.13773	0.478063	1	0.769029	1
GO:0002880	regulation of chronic inflammatory response to non-antigenic stimulus	1	1	0.13773	0.478063	1	0.769029	1
GO:0002881	negative regulation of chronic inflammatory response to non-antigenic stimulus	1	1	0.13773	0.478063	1	0.769029	1
GO:0002912	negative regulation of lymphocyte anergy	1	1	0.13773	0.478063	1	0.769029	1
GO:0006002	fructose 6-phosphate metabolic process	1	1	0.13773	0.478063	1	0.769029	1
GO:0006778	porphyrin-containing compound metabolic process	1	1	0.13773	0.478063	1	0.769029	1
GO:0006787	porphyrin-containing compound catabolic process	1	1	0.13773	0.478063	1	0.769029	1
GO:0006788	heme oxidation	1	1	0.13773	0.478063	1	0.769029	1
GO:0006828	manganese ion transport	1	1	0.13773	0.478063	1	0.769029	1
GO:0006933	negative regulation of cell adhesion involved in substrate-bound cell migration	1	1	0.13773	0.478063	1	0.769029	1
GO:0007379	segment specification	1	1	0.13773	0.478063	1	0.769029	1
GO:0009597	detection of virus	1	1	0.13773	0.478063	1	0.769029	1
GO:0009635	response to herbicide	1	1	0.13773	0.478063	1	0.769029	1
GO:0010193	response to ozone	1	1	0.13773	0.478063	1	0.769029	1
GO:0010838	positive regulation of keratinocyte proliferation	1	1	0.13773	0.478063	1	0.769029	1
GO:0010887	negative regulation of cholesterol storage	1	1	0.13773	0.478063	1	0.769029	1
GO:0010891	negative regulation of sequestering of triglyceride	1	1	0.13773	0.478063	1	0.769029	1
GO:0010920	negative regulation of inositol phosphate biosynthetic process	1	1	0.13773	0.478063	1	0.769029	1
GO:0010924	regulation of inositol-polyphosphate 5-phosphatase activity	1	1	0.13773	0.478063	1	0.769029	1
GO:0010925	positive regulation of inositol-polyphosphate 5-phosphatase activity	1	1	0.13773	0.478063	1	0.769029	1
GO:0010982	regulation of high-density lipoprotein particle clearance	1	1	0.13773	0.478063	1	0.769029	1
GO:0010983	positive regulation of high-density lipoprotein particle clearance	1	1	0.13773	0.478063	1	0.769029	1
GO:0010986	positive regulation of lipoprotein particle clearance	1	1	0.13773	0.478063	1	0.769029	1
GO:0014006	regulation of microglia differentiation	1	1	0.13773	0.478063	1	0.769029	1
GO:0014008	positive regulation of microglia differentiation	1	1	0.13773	0.478063	1	0.769029	1
GO:0014062	regulation of serotonin secretion	1	1	0.13773	0.478063	1	0.769029	1
GO:0014064	positive regulation of serotonin secretion	1	1	0.13773	0.478063	1	0.769029	1
GO:0014738	regulation of muscle hyperplasia	1	1	0.13773	0.478063	1	0.769029	1
GO:0014739	positive regulation of muscle hyperplasia	1	1	0.13773	0.478063	1	0.769029	1
GO:0014900	muscle hyperplasia	1	1	0.13773	0.478063	1	0.769029	1
GO:0015691	cadmium ion transport	1	1	0.13773	0.478063	1	0.769029	1
GO:0015707	nitrite transport	1	1	0.13773	0.478063	1	0.769029	1
GO:0015891	siderophore transport	1	1	0.13773	0.478063	1	0.769029	1
GO:0016046	detection of fungus	1	1	0.13773	0.478063	1	0.769029	1
GO:0016075	rRNA catabolic process	1	1	0.13773	0.478063	1	0.769029	1
GO:0016078	tRNA decay	1	1	0.13773	0.478063	1	0.769029	1
GO:0021546	rhombomere development	1	1	0.13773	0.478063	1	0.769029	1
GO:0021560	abducens nerve development	1	1	0.13773	0.478063	1	0.769029	1
GO:0021571	rhombomere 5 development	1	1	0.13773	0.478063	1	0.769029	1
GO:0021572	rhombomere 6 development	1	1	0.13773	0.478063	1	0.769029	1
GO:0021598	abducens nerve morphogenesis	1	1	0.13773	0.478063	1	0.769029	1
GO:0021599	abducens nerve formation	1	1	0.13773	0.478063	1	0.769029	1
GO:0021603	cranial nerve formation	1	1	0.13773	0.478063	1	0.769029	1
GO:0030167	proteoglycan catabolic process	1	1	0.13773	0.478063	1	0.769029	1
GO:0030450	regulation of complement activation, classical pathway	1	1	0.13773	0.478063	1	0.769029	1
GO:0030836	positive regulation of actin filament depolymerization	1	1	0.13773	0.478063	1	0.769029	1
GO:0031293	membrane protein intracellular domain proteolysis	1	1	0.13773	0.478063	1	0.769029	1
GO:0031584	activation of phospholipase D activity	1	1	0.13773	0.478063	1	0.769029	1
GO:0032459	regulation of protein oligomerization	1	1	0.13773	0.478063	1	0.769029	1
GO:0032461	positive regulation of protein oligomerization	1	1	0.13773	0.478063	1	0.769029	1
GO:0032491	detection of molecule of fungal origin	1	1	0.13773	0.478063	1	0.769029	1
GO:0032685	negative regulation of granulocyte macrophage colony-stimulating factor production	1	1	0.13773	0.478063	1	0.769029	1
GO:0032831	positive regulation of CD4-positive, CD25-positive, alpha-beta regulatory T cell differentiation	1	1	0.13773	0.478063	1	0.769029	1
GO:0033013	tetrapyrrole metabolic process	1	1	0.13773	0.478063	1	0.769029	1
GO:0033015	tetrapyrrole catabolic process	1	1	0.13773	0.478063	1	0.769029	1
GO:0033552	response to vitamin B3	1	1	0.13773	0.478063	1	0.769029	1
GO:0033860	regulation of NAD(P)H oxidase activity	1	1	0.13773	0.478063	1	0.769029	1
GO:0034123	positive regulation of toll-like receptor signaling pathway	1	1	0.13773	0.478063	1	0.769029	1
GO:0034127	regulation of MyD88-independent toll-like receptor signaling pathway	1	1	0.13773	0.478063	1	0.769029	1
GO:0034150	toll-like receptor 6 signaling pathway	1	1	0.13773	0.478063	1	0.769029	1
GO:0034151	regulation of toll-like receptor 6 signaling pathway	1	1	0.13773	0.478063	1	0.769029	1
GO:0034155	regulation of toll-like receptor 7 signaling pathway	1	1	0.13773	0.478063	1	0.769029	1
GO:0034157	positive regulation of toll-like receptor 7 signaling pathway	1	1	0.13773	0.478063	1	0.769029	1
GO:0034240	negative regulation of macrophage fusion	1	1	0.13773	0.478063	1	0.769029	1
GO:0034756	regulation of iron ion transport	1	1	0.13773	0.478063	1	0.769029	1
GO:0034758	positive regulation of iron ion transport	1	1	0.13773	0.478063	1	0.769029	1
GO:0034759	regulation of iron ion transmembrane transport	1	1	0.13773	0.478063	1	0.769029	1
GO:0034761	positive regulation of iron ion transmembrane transport	1	1	0.13773	0.478063	1	0.769029	1
GO:0034769	basement membrane disassembly	1	1	0.13773	0.478063	1	0.769029	1
GO:0035283	central nervous system segmentation	1	1	0.13773	0.478063	1	0.769029	1
GO:0035284	brain segmentation	1	1	0.13773	0.478063	1	0.769029	1
GO:0035393	chemokine (C-X-C motif) ligand 9 production	1	1	0.13773	0.478063	1	0.769029	1
GO:0035687	T-helper 1 cell extravasation	1	1	0.13773	0.478063	1	0.769029	1
GO:0035688	T-helper 1 cell diapedesis	1	1	0.13773	0.478063	1	0.769029	1
GO:0035689	chemokine (C-C motif) ligand 5 signaling pathway	1	1	0.13773	0.478063	1	0.769029	1
GO:0035705	T-helper 17 cell chemotaxis	1	1	0.13773	0.478063	1	0.769029	1
GO:0035766	cell chemotaxis to fibroblast growth factor	1	1	0.13773	0.478063	1	0.769029	1
GO:0035768	endothelial cell chemotaxis to fibroblast growth factor	1	1	0.13773	0.478063	1	0.769029	1
GO:0035769	B cell chemotaxis across high endothelial venule	1	1	0.13773	0.478063	1	0.769029	1
GO:0035944	perforin production	1	1	0.13773	0.478063	1	0.769029	1
GO:0036035	osteoclast development	1	1	0.13773	0.478063	1	0.769029	1
GO:0038118	C-C chemokine receptor CCR7 signaling pathway	1	1	0.13773	0.478063	1	0.769029	1
GO:0038178	complement component C5a signaling pathway	1	1	0.13773	0.478063	1	0.769029	1
GO:0042167	heme catabolic process	1	1	0.13773	0.478063	1	0.769029	1
GO:0042168	heme metabolic process	1	1	0.13773	0.478063	1	0.769029	1
GO:0042695	thelarche	1	1	0.13773	0.478063	1	0.769029	1
GO:0043309	regulation of eosinophil degranulation	1	1	0.13773	0.478063	1	0.769029	1
GO:0043310	negative regulation of eosinophil degranulation	1	1	0.13773	0.478063	1	0.769029	1
GO:0045210	FasL biosynthetic process	1	1	0.13773	0.478063	1	0.769029	1
GO:0045217	cell-cell junction maintenance	1	1	0.13773	0.478063	1	0.769029	1
GO:0045219	regulation of FasL production	1	1	0.13773	0.478063	1	0.769029	1
GO:0045221	negative regulation of FasL production	1	1	0.13773	0.478063	1	0.769029	1
GO:0045347	negative regulation of MHC class II biosynthetic process	1	1	0.13773	0.478063	1	0.769029	1
GO:0045584	negative regulation of cytotoxic T cell differentiation	1	1	0.13773	0.478063	1	0.769029	1
GO:0045650	negative regulation of macrophage differentiation	1	1	0.13773	0.478063	1	0.769029	1
GO:0045658	regulation of neutrophil differentiation	1	1	0.13773	0.478063	1	0.769029	1
GO:0045659	negative regulation of neutrophil differentiation	1	1	0.13773	0.478063	1	0.769029	1
GO:0045728	respiratory burst after phagocytosis	1	1	0.13773	0.478063	1	0.769029	1
GO:0045960	positive regulation of complement activation, classical pathway	1	1	0.13773	0.478063	1	0.769029	1
GO:0046149	pigment catabolic process	1	1	0.13773	0.478063	1	0.769029	1
GO:0046719	regulation by virus of viral protein levels in host cell	1	1	0.13773	0.478063	1	0.769029	1
GO:0046725	negative regulation by virus of viral protein levels in host cell	1	1	0.13773	0.478063	1	0.769029	1
GO:0046835	carbohydrate phosphorylation	1	1	0.13773	0.478063	1	0.769029	1
GO:0051639	actin filament network formation	1	1	0.13773	0.478063	1	0.769029	1
GO:0055091	phospholipid homeostasis	1	1	0.13773	0.478063	1	0.769029	1
GO:0060137	maternal process involved in parturition	1	1	0.13773	0.478063	1	0.769029	1
GO:0060158	phospholipase C-activating dopamine receptor signaling pathway	1	1	0.13773	0.478063	1	0.769029	1
GO:0060232	delamination	1	1	0.13773	0.478063	1	0.769029	1
GO:0060267	positive regulation of respiratory burst	1	1	0.13773	0.478063	1	0.769029	1
GO:0060305	regulation of cell diameter	1	1	0.13773	0.478063	1	0.769029	1
GO:0060363	cranial suture morphogenesis	1	1	0.13773	0.478063	1	0.769029	1
GO:0060364	frontal suture morphogenesis	1	1	0.13773	0.478063	1	0.769029	1
GO:0060744	mammary gland branching involved in thelarche	1	1	0.13773	0.478063	1	0.769029	1
GO:0060751	branch elongation involved in mammary gland duct branching	1	1	0.13773	0.478063	1	0.769029	1
GO:0060762	regulation of branching involved in mammary gland duct morphogenesis	1	1	0.13773	0.478063	1	0.769029	1
GO:0061516	monocyte proliferation	1	1	0.13773	0.478063	1	0.769029	1
GO:0061889	negative regulation of astrocyte activation	1	1	0.13773	0.478063	1	0.769029	1
GO:0061890	positive regulation of astrocyte activation	1	1	0.13773	0.478063	1	0.769029	1
GO:0062232	prostanoid catabolic process	1	1	0.13773	0.478063	1	0.769029	1
GO:0070165	positive regulation of adiponectin secretion	1	1	0.13773	0.478063	1	0.769029	1
GO:0070305	response to cGMP	1	1	0.13773	0.478063	1	0.769029	1
GO:0070392	detection of lipoteichoic acid	1	1	0.13773	0.478063	1	0.769029	1
GO:0070424	regulation of nucleotide-binding domain, leucine rich repeat containing receptor signaling pathway	1	1	0.13773	0.478063	1	0.769029	1
GO:0070426	positive regulation of nucleotide-binding domain, leucine rich repeat containing receptor signaling pathway	1	1	0.13773	0.478063	1	0.769029	1
GO:0070428	regulation of nucleotide-binding oligomerization domain containing 1 signaling pathway	1	1	0.13773	0.478063	1	0.769029	1
GO:0070430	positive regulation of nucleotide-binding oligomerization domain containing 1 signaling pathway	1	1	0.13773	0.478063	1	0.769029	1
GO:0070432	regulation of nucleotide-binding oligomerization domain containing 2 signaling pathway	1	1	0.13773	0.478063	1	0.769029	1
GO:0070434	positive regulation of nucleotide-binding oligomerization domain containing 2 signaling pathway	1	1	0.13773	0.478063	1	0.769029	1
GO:0070560	protein secretion by platelet	1	1	0.13773	0.478063	1	0.769029	1
GO:0070574	cadmium ion transmembrane transport	1	1	0.13773	0.478063	1	0.769029	1
GO:0070950	regulation of neutrophil mediated killing of bacterium	1	1	0.13773	0.478063	1	0.769029	1
GO:0070951	regulation of neutrophil mediated killing of gram-negative bacterium	1	1	0.13773	0.478063	1	0.769029	1
GO:0071403	cellular response to high density lipoprotein particle stimulus	1	1	0.13773	0.478063	1	0.769029	1
GO:0071421	manganese ion transmembrane transport	1	1	0.13773	0.478063	1	0.769029	1
GO:0071585	detoxification of cadmium ion	1	1	0.13773	0.478063	1	0.769029	1
GO:0071670	smooth muscle cell chemotaxis	1	1	0.13773	0.478063	1	0.769029	1
GO:0071671	regulation of smooth muscle cell chemotaxis	1	1	0.13773	0.478063	1	0.769029	1
GO:0071672	negative regulation of smooth muscle cell chemotaxis	1	1	0.13773	0.478063	1	0.769029	1
GO:0071673	positive regulation of smooth muscle cell chemotaxis	1	1	0.13773	0.478063	1	0.769029	1
GO:0072135	kidney mesenchymal cell proliferation	1	1	0.13773	0.478063	1	0.769029	1
GO:0072136	metanephric mesenchymal cell proliferation involved in metanephros development	1	1	0.13773	0.478063	1	0.769029	1
GO:0072161	mesenchymal cell differentiation involved in kidney development	1	1	0.13773	0.478063	1	0.769029	1
GO:0072162	metanephric mesenchymal cell differentiation	1	1	0.13773	0.478063	1	0.769029	1
GO:0072183	negative regulation of nephron tubule epithelial cell differentiation	1	1	0.13773	0.478063	1	0.769029	1
GO:0072308	negative regulation of metanephric nephron tubule epithelial cell differentiation	1	1	0.13773	0.478063	1	0.769029	1
GO:0075733	intracellular transport of virus	1	1	0.13773	0.478063	1	0.769029	1
GO:0090027	negative regulation of monocyte chemotaxis	1	1	0.13773	0.478063	1	0.769029	1
GO:0090185	negative regulation of kidney development	1	1	0.13773	0.478063	1	0.769029	1
GO:0097087	interleukin-17A production	1	1	0.13773	0.478063	1	0.769029	1
GO:0097501	stress response to metal ion	1	1	0.13773	0.478063	1	0.769029	1
GO:0098508	endothelial to hematopoietic transition	1	1	0.13773	0.478063	1	0.769029	1
GO:0098711	iron ion import across plasma membrane	1	1	0.13773	0.478063	1	0.769029	1
GO:0098751	bone cell development	1	1	0.13773	0.478063	1	0.769029	1
GO:0098849	cellular detoxification of cadmium ion	1	1	0.13773	0.478063	1	0.769029	1
GO:0110090	positive regulation of hippocampal neuron apoptotic process	1	1	0.13773	0.478063	1	0.769029	1
GO:0120186	negative regulation of protein localization to chromatin	1	1	0.13773	0.478063	1	0.769029	1
GO:0140961	cellular detoxification of metal ion	1	1	0.13773	0.478063	1	0.769029	1
GO:0141201	pyroptotic cell death	1	1	0.13773	0.478063	1	0.769029	1
GO:0150089	multiple spine synapse organization	1	1	0.13773	0.478063	1	0.769029	1
GO:0150090	multiple spine synapse organization, single dendrite	1	1	0.13773	0.478063	1	0.769029	1
GO:0150102	negative regulation of monocyte activation	1	1	0.13773	0.478063	1	0.769029	1
GO:0150151	regulation of interleukin-17A production	1	1	0.13773	0.478063	1	0.769029	1
GO:0150153	positive regulation of interleukin-17A production	1	1	0.13773	0.478063	1	0.769029	1
GO:0160075	non-canonical inflammasome complex assembly	1	1	0.13773	0.478063	1	0.769029	1
GO:1900126	negative regulation of hyaluronan biosynthetic process	1	1	0.13773	0.478063	1	0.769029	1
GO:1900245	positive regulation of MDA-5 signaling pathway	1	1	0.13773	0.478063	1	0.769029	1
GO:1900623	regulation of monocyte aggregation	1	1	0.13773	0.478063	1	0.769029	1
GO:1900625	positive regulation of monocyte aggregation	1	1	0.13773	0.478063	1	0.769029	1
GO:1901018	positive regulation of potassium ion transmembrane transporter activity	1	1	0.13773	0.478063	1	0.769029	1
GO:1901074	regulation of engulfment of apoptotic cell	1	1	0.13773	0.478063	1	0.769029	1
GO:1901076	positive regulation of engulfment of apoptotic cell	1	1	0.13773	0.478063	1	0.769029	1
GO:1901252	regulation of intracellular transport of viral material	1	1	0.13773	0.478063	1	0.769029	1
GO:1901253	negative regulation of intracellular transport of viral material	1	1	0.13773	0.478063	1	0.769029	1
GO:1901381	positive regulation of potassium ion transmembrane transport	1	1	0.13773	0.478063	1	0.769029	1
GO:1901523	icosanoid catabolic process	1	1	0.13773	0.478063	1	0.769029	1
GO:1901569	fatty acid derivative catabolic process	1	1	0.13773	0.478063	1	0.769029	1
GO:1901678	iron coordination entity transport	1	1	0.13773	0.478063	1	0.769029	1
GO:1901881	positive regulation of protein depolymerization	1	1	0.13773	0.478063	1	0.769029	1
GO:1901895	negative regulation of ATPase-coupled calcium transmembrane transporter activity	1	1	0.13773	0.478063	1	0.769029	1
GO:1901979	regulation of inward rectifier potassium channel activity	1	1	0.13773	0.478063	1	0.769029	1
GO:1901980	positive regulation of inward rectifier potassium channel activity	1	1	0.13773	0.478063	1	0.769029	1
GO:1902215	negative regulation of interleukin-4-mediated signaling pathway	1	1	0.13773	0.478063	1	0.769029	1
GO:1902227	negative regulation of macrophage colony-stimulating factor signaling pathway	1	1	0.13773	0.478063	1	0.769029	1
GO:1902349	response to chloroquine	1	1	0.13773	0.478063	1	0.769029	1
GO:1902350	cellular response to chloroquine	1	1	0.13773	0.478063	1	0.769029	1
GO:1902482	regulatory T cell apoptotic process	1	1	0.13773	0.478063	1	0.769029	1
GO:1902564	negative regulation of neutrophil activation	1	1	0.13773	0.478063	1	0.769029	1
GO:1902623	negative regulation of neutrophil migration	1	1	0.13773	0.478063	1	0.769029	1
GO:1902685	positive regulation of receptor localization to synapse	1	1	0.13773	0.478063	1	0.769029	1
GO:1903080	regulation of C-C chemokine receptor CCR7 signaling pathway	1	1	0.13773	0.478063	1	0.769029	1
GO:1903082	positive regulation of C-C chemokine receptor CCR7 signaling pathway	1	1	0.13773	0.478063	1	0.769029	1
GO:1903121	regulation of TRAIL-activated apoptotic signaling pathway	1	1	0.13773	0.478063	1	0.769029	1
GO:1903332	regulation of protein folding	1	1	0.13773	0.478063	1	0.769029	1
GO:1903334	positive regulation of protein folding	1	1	0.13773	0.478063	1	0.769029	1
GO:1903769	negative regulation of cell proliferation in bone marrow	1	1	0.13773	0.478063	1	0.769029	1
GO:1903818	positive regulation of voltage-gated potassium channel activity	1	1	0.13773	0.478063	1	0.769029	1
GO:1903984	positive regulation of TRAIL-activated apoptotic signaling pathway	1	1	0.13773	0.478063	1	0.769029	1
GO:1904150	negative regulation of microglial cell mediated cytotoxicity	1	1	0.13773	0.478063	1	0.769029	1
GO:1904438	regulation of iron ion import across plasma membrane	1	1	0.13773	0.478063	1	0.769029	1
GO:1904440	positive regulation of iron ion import across plasma membrane	1	1	0.13773	0.478063	1	0.769029	1
GO:1904445	negative regulation of establishment of Sertoli cell barrier	1	1	0.13773	0.478063	1	0.769029	1
GO:1904550	response to arachidonate	1	1	0.13773	0.478063	1	0.769029	1
GO:1904847	regulation of cell chemotaxis to fibroblast growth factor	1	1	0.13773	0.478063	1	0.769029	1
GO:1904848	negative regulation of cell chemotaxis to fibroblast growth factor	1	1	0.13773	0.478063	1	0.769029	1
GO:1904905	negative regulation of endothelial cell-matrix adhesion via fibronectin	1	1	0.13773	0.478063	1	0.769029	1
GO:1905220	negative regulation of platelet formation	1	1	0.13773	0.478063	1	0.769029	1
GO:1905237	response to cyclosporin A	1	1	0.13773	0.478063	1	0.769029	1
GO:1905291	positive regulation of CAMKK-AMPK signaling cascade	1	1	0.13773	0.478063	1	0.769029	1
GO:1905298	regulation of intestinal epithelial cell development	1	1	0.13773	0.478063	1	0.769029	1
GO:1905300	positive regulation of intestinal epithelial cell development	1	1	0.13773	0.478063	1	0.769029	1
GO:1905344	prostaglandin catabolic process	1	1	0.13773	0.478063	1	0.769029	1
GO:1905397	activated CD8-positive, alpha-beta T cell apoptotic process	1	1	0.13773	0.478063	1	0.769029	1
GO:1905402	regulation of activated CD8-positive, alpha-beta T cell apoptotic process	1	1	0.13773	0.478063	1	0.769029	1
GO:1905404	positive regulation of activated CD8-positive, alpha-beta T cell apoptotic process	1	1	0.13773	0.478063	1	0.769029	1
GO:1905581	positive regulation of low-density lipoprotein particle clearance	1	1	0.13773	0.478063	1	0.769029	1
GO:1905640	response to acetaldehyde	1	1	0.13773	0.478063	1	0.769029	1
GO:1905641	cellular response to acetaldehyde	1	1	0.13773	0.478063	1	0.769029	1
GO:1905805	excitatory synapse pruning	1	1	0.13773	0.478063	1	0.769029	1
GO:1905808	positive regulation of synapse pruning	1	1	0.13773	0.478063	1	0.769029	1
GO:1905828	regulation of prostaglandin catabolic process	1	1	0.13773	0.478063	1	0.769029	1
GO:1990170	stress response to cadmium ion	1	1	0.13773	0.478063	1	0.769029	1
GO:1990402	embryonic liver development	1	1	0.13773	0.478063	1	0.769029	1
GO:1990959	eosinophil homeostasis	1	1	0.13773	0.478063	1	0.769029	1
GO:2000350	positive regulation of CD40 signaling pathway	1	1	0.13773	0.478063	1	0.769029	1
GO:2000361	regulation of prostaglandin-E synthase activity	1	1	0.13773	0.478063	1	0.769029	1
GO:2000363	positive regulation of prostaglandin-E synthase activity	1	1	0.13773	0.478063	1	0.769029	1
GO:2000464	positive regulation of astrocyte chemotaxis	1	1	0.13773	0.478063	1	0.769029	1
GO:2000492	regulation of interleukin-18-mediated signaling pathway	1	1	0.13773	0.478063	1	0.769029	1
GO:2000494	positive regulation of interleukin-18-mediated signaling pathway	1	1	0.13773	0.478063	1	0.769029	1
GO:2000502	negative regulation of natural killer cell chemotaxis	1	1	0.13773	0.478063	1	0.769029	1
GO:2000509	negative regulation of dendritic cell chemotaxis	1	1	0.13773	0.478063	1	0.769029	1
GO:2000524	negative regulation of T cell costimulation	1	1	0.13773	0.478063	1	0.769029	1
GO:2000527	regulation of myeloid dendritic cell chemotaxis	1	1	0.13773	0.478063	1	0.769029	1
GO:2000529	positive regulation of myeloid dendritic cell chemotaxis	1	1	0.13773	0.478063	1	0.769029	1
GO:2000544	regulation of endothelial cell chemotaxis to fibroblast growth factor	1	1	0.13773	0.478063	1	0.769029	1
GO:2000545	negative regulation of endothelial cell chemotaxis to fibroblast growth factor	1	1	0.13773	0.478063	1	0.769029	1
GO:2000636	positive regulation of primary miRNA processing	1	1	0.13773	0.478063	1	0.769029	1
GO:2001012	mesenchymal cell differentiation involved in renal system development	1	1	0.13773	0.478063	1	0.769029	1
GO:2001204	regulation of osteoclast development	1	1	0.13773	0.478063	1	0.769029	1
GO:2001206	positive regulation of osteoclast development	1	1	0.13773	0.478063	1	0.769029	1
GO:0002709	regulation of T cell mediated immunity	9	44	0.13928	0.478063	1	0.769029	1
GO:0042060	wound healing	16	88	0.1395	0.478063	1	1	1
GO:1903039	positive regulation of leukocyte cell-cell adhesion	20	114	0.1396	0.478063	1	0.769029	1
GO:0002347	response to tumor cell	4	15	0.13997	0.478063	1	1	1
GO:0006953	acute-phase response	4	15	0.13997	0.478063	1	0.769029	1
GO:0007520	myoblast fusion	4	15	0.13997	0.478063	1	0.769029	1
GO:0031294	lymphocyte costimulation	4	15	0.13997	0.478063	1	0.769029	1
GO:0031295	T cell costimulation	4	15	0.13997	0.478063	1	0.769029	1
GO:0031342	negative regulation of cell killing	4	15	0.13997	0.478063	1	0.769029	1
GO:0043954	cellular component maintenance	4	15	0.13997	0.478063	1	0.769029	1
GO:0050856	regulation of T cell receptor signaling pathway	4	15	0.13997	0.478063	1	1	1
GO:0090022	regulation of neutrophil chemotaxis	4	15	0.13997	0.478063	1	0.769029	1
GO:1905330	regulation of morphogenesis of an epithelium	4	15	0.13997	0.478063	1	1	1
GO:0002862	negative regulation of inflammatory response to antigenic stimulus	2	5	0.14231	0.478063	1	0.769029	1
GO:0002925	positive regulation of humoral immune response mediated by circulating immunoglobulin	2	5	0.14231	0.478063	1	0.769029	1
GO:0006907	pinocytosis	2	5	0.14231	0.478063	1	0.769029	1
GO:0010572	positive regulation of platelet activation	2	5	0.14231	0.478063	1	0.769029	1
GO:0010757	negative regulation of plasminogen activation	2	5	0.14231	0.478063	1	0.769029	1
GO:0030220	platelet formation	2	5	0.14231	0.478063	1	0.769029	1
GO:0032747	positive regulation of interleukin-23 production	2	5	0.14231	0.478063	1	0.769029	1
GO:0032958	inositol phosphate biosynthetic process	2	5	0.14231	0.478063	1	0.769029	1
GO:0033031	positive regulation of neutrophil apoptotic process	2	5	0.14231	0.478063	1	0.769029	1
GO:0033623	regulation of integrin activation	2	5	0.14231	0.478063	1	0.769029	1
GO:0033631	cell-cell adhesion mediated by integrin	2	5	0.14231	0.478063	1	0.769029	1
GO:0034145	positive regulation of toll-like receptor 4 signaling pathway	2	5	0.14231	0.478063	1	0.769029	1
GO:0034755	iron ion transmembrane transport	2	5	0.14231	0.478063	1	0.769029	1
GO:0035561	regulation of chromatin binding	2	5	0.14231	0.478063	1	0.769029	1
GO:0035701	hematopoietic stem cell migration	2	5	0.14231	0.478063	1	1	1
GO:0036120	cellular response to platelet-derived growth factor stimulus	2	5	0.14231	0.478063	1	0.769029	1
GO:0036344	platelet morphogenesis	2	5	0.14231	0.478063	1	0.769029	1
GO:0043922	negative regulation by host of viral transcription	2	5	0.14231	0.478063	1	0.769029	1
GO:0044790	suppression of viral release by host	2	5	0.14231	0.478063	1	0.769029	1
GO:1902166	negative regulation of intrinsic apoptotic signaling pathway in response to DNA damage by p53 class mediator	2	5	0.14231	0.478063	1	0.769029	1
GO:1903721	positive regulation of I-kappaB phosphorylation	2	5	0.14231	0.478063	1	0.769029	1
GO:1904124	microglial cell migration	2	5	0.14231	0.478063	1	0.769029	1
GO:1904139	regulation of microglial cell migration	2	5	0.14231	0.478063	1	0.769029	1
GO:1904141	positive regulation of microglial cell migration	2	5	0.14231	0.478063	1	0.769029	1
GO:2000310	regulation of NMDA receptor activity	2	5	0.14231	0.478063	1	1	1
GO:2001188	regulation of T cell activation via T cell receptor contact with antigen bound to MHC molecule on antigen presenting cell	2	5	0.14231	0.478063	1	0.769029	1
GO:0032946	positive regulation of mononuclear cell proliferation	15	82	0.14406	0.483523	1	0.776269	1
GO:0002418	immune response to tumor cell	3	10	0.14822	0.493643	1	1	1
GO:0002834	regulation of response to tumor cell	3	10	0.14822	0.493643	1	1	1
GO:0010714	positive regulation of collagen metabolic process	3	10	0.14822	0.493643	1	0.784575	1
GO:0019883	antigen processing and presentation of endogenous antigen	3	10	0.14822	0.493643	1	0.784575	1
GO:0022600	digestive system process	3	10	0.14822	0.493643	1	0.784575	1
GO:0032494	response to peptidoglycan	3	10	0.14822	0.493643	1	0.784575	1
GO:0032692	negative regulation of interleukin-1 production	3	10	0.14822	0.493643	1	0.784575	1
GO:0045648	positive regulation of erythrocyte differentiation	3	10	0.14822	0.493643	1	0.784575	1
GO:0070672	response to interleukin-15	3	10	0.14822	0.493643	1	0.784575	1
GO:0032620	interleukin-17 production	5	21	0.15116	0.501712	1	0.795795	1
GO:0032743	positive regulation of interleukin-2 production	5	21	0.15116	0.501712	1	0.795795	1
GO:0050850	positive regulation of calcium-mediated signaling	5	21	0.15116	0.501712	1	0.795795	1
GO:1903409	reactive oxygen species biosynthetic process	5	21	0.15116	0.501712	1	0.795795	1
GO:0009891	positive regulation of biosynthetic process	68	447	0.15184	0.503538	1	1	1
GO:0042100	B cell proliferation	9	45	0.15449	0.511888	1	1	1
GO:1900015	regulation of cytokine production involved in inflammatory response	6	27	0.15589	0.516086	1	0.819158	1
GO:0032609	type II interferon production	12	64	0.15782	0.52203	1	0.826372	1
GO:0051179	localization	78	520	0.15993	0.528559	1	1	1
GO:0055082	intracellular chemical homeostasis	21	123	0.16232	0.536001	1	1	1
GO:0045766	positive regulation of angiogenesis	10	52	0.16655	0.549502	1	0.868567	1
GO:0002920	regulation of humoral immune response	4	16	0.16763	0.550258	1	1	1
GO:0019083	viral transcription	4	16	0.16763	0.550258	1	0.869525	1
GO:0032872	regulation of stress-activated MAPK cascade	4	16	0.16763	0.550258	1	1	1
GO:0070302	regulation of stress-activated protein kinase signaling cascade	4	16	0.16763	0.550258	1	1	1
GO:0070373	negative regulation of ERK1 and ERK2 cascade	4	16	0.16763	0.550258	1	0.869525	1
GO:1904894	positive regulation of receptor signaling pathway via STAT	4	16	0.16763	0.550258	1	0.869525	1
GO:0031328	positive regulation of cellular biosynthetic process	67	443	0.17024	0.558353	1	1	1
GO:0051651	maintenance of location in cell	9	46	0.17048	0.558668	1	0.880775	1
GO:0051924	regulation of calcium ion transport	12	65	0.17129	0.560848	1	0.88328	1
GO:0043122	regulation of canonical NF-kappaB signal transduction	16	91	0.17264	0.564792	1	0.888386	1
GO:0032963	collagen metabolic process	5	22	0.17505	0.571712	1	0.895296	1
GO:0043368	positive T cell selection	5	22	0.17505	0.571712	1	0.895296	1
GO:0002534	cytokine production involved in inflammatory response	6	28	0.17706	0.577305	1	0.895296	1
GO:1904064	positive regulation of cation transmembrane transport	6	28	0.17706	0.577305	1	0.895296	1
GO:0050870	positive regulation of T cell activation	18	105	0.18217	0.593467	1	0.895296	1
GO:0002407	dendritic cell chemotaxis	3	11	0.18417	0.594492	1	0.895296	1
GO:0002643	regulation of tolerance induction	3	11	0.18417	0.594492	1	1	1
GO:0007586	digestion	3	11	0.18417	0.594492	1	0.895296	1
GO:0032645	regulation of granulocyte macrophage colony-stimulating factor production	3	11	0.18417	0.594492	1	0.895296	1
GO:0034138	toll-like receptor 3 signaling pathway	3	11	0.18417	0.594492	1	0.895296	1
GO:0045662	negative regulation of myoblast differentiation	3	11	0.18417	0.594492	1	0.895296	1
GO:0070234	positive regulation of T cell apoptotic process	3	11	0.18417	0.594492	1	0.895296	1
GO:0140029	exocytic process	3	11	0.18417	0.594492	1	0.895296	1
GO:1902743	regulation of lamellipodium organization	3	11	0.18417	0.594492	1	0.895296	1
GO:1902808	positive regulation of cell cycle G1/S phase transition	3	11	0.18417	0.594492	1	0.895296	1
GO:2001257	regulation of cation channel activity	3	11	0.18417	0.594492	1	0.895296	1
GO:0032655	regulation of interleukin-12 production	8	41	0.19205	0.606994	1	0.895296	1
GO:0007155	cell adhesion	43	277	0.19267	0.606994	1	1	1
GO:0002424	T cell mediated immune response to tumor cell	2	6	0.19477	0.606994	1	0.895296	1
GO:0002606	positive regulation of dendritic cell antigen processing and presentation	2	6	0.19477	0.606994	1	0.895296	1
GO:0002664	regulation of T cell tolerance induction	2	6	0.19477	0.606994	1	0.895296	1
GO:0002840	regulation of T cell mediated immune response to tumor cell	2	6	0.19477	0.606994	1	0.895296	1
GO:0006516	glycoprotein catabolic process	2	6	0.19477	0.606994	1	0.895296	1
GO:0006826	iron ion transport	2	6	0.19477	0.606994	1	0.895296	1
GO:0016045	detection of bacterium	2	6	0.19477	0.606994	1	1	1
GO:0030212	hyaluronan metabolic process	2	6	0.19477	0.606994	1	1	1
GO:0030574	collagen catabolic process	2	6	0.19477	0.606994	1	0.895296	1
GO:0031620	regulation of fever generation	2	6	0.19477	0.606994	1	0.895296	1
GO:0031622	positive regulation of fever generation	2	6	0.19477	0.606994	1	0.895296	1
GO:0031650	regulation of heat generation	2	6	0.19477	0.606994	1	0.895296	1
GO:0031652	positive regulation of heat generation	2	6	0.19477	0.606994	1	0.895296	1
GO:0032026	response to magnesium ion	2	6	0.19477	0.606994	1	0.895296	1
GO:0032763	regulation of mast cell cytokine production	2	6	0.19477	0.606994	1	0.895296	1
GO:0033280	response to vitamin D	2	6	0.19477	0.606994	1	0.895296	1
GO:0034351	negative regulation of glial cell apoptotic process	2	6	0.19477	0.606994	1	0.895296	1
GO:0035666	TRIF-dependent toll-like receptor signaling pathway	2	6	0.19477	0.606994	1	0.895296	1
GO:0036119	response to platelet-derived growth factor	2	6	0.19477	0.606994	1	0.895296	1
GO:0038156	interleukin-3-mediated signaling pathway	2	6	0.19477	0.606994	1	0.895296	1
GO:0043117	positive regulation of vascular permeability	2	6	0.19477	0.606994	1	0.895296	1
GO:0043518	negative regulation of DNA damage response, signal transduction by p53 class mediator	2	6	0.19477	0.606994	1	0.895296	1
GO:0043647	inositol phosphate metabolic process	2	6	0.19477	0.606994	1	0.895296	1
GO:0045346	regulation of MHC class II biosynthetic process	2	6	0.19477	0.606994	1	0.895296	1
GO:0046007	negative regulation of activated T cell proliferation	2	6	0.19477	0.606994	1	0.895296	1
GO:0051917	regulation of fibrinolysis	2	6	0.19477	0.606994	1	0.895296	1
GO:0061450	trophoblast cell migration	2	6	0.19477	0.606994	1	0.895296	1
GO:0071224	cellular response to peptidoglycan	2	6	0.19477	0.606994	1	0.895296	1
GO:0090314	positive regulation of protein targeting to membrane	2	6	0.19477	0.606994	1	0.895296	1
GO:0097186	amelogenesis	2	6	0.19477	0.606994	1	0.895296	1
GO:0098760	response to interleukin-7	2	6	0.19477	0.606994	1	0.895296	1
GO:0098761	cellular response to interleukin-7	2	6	0.19477	0.606994	1	0.895296	1
GO:0150079	negative regulation of neuroinflammatory response	2	6	0.19477	0.606994	1	0.895296	1
GO:1900272	negative regulation of long-term synaptic potentiation	2	6	0.19477	0.606994	1	0.895296	1
GO:1901019	regulation of calcium ion transmembrane transporter activity	2	6	0.19477	0.606994	1	0.895296	1
GO:1901163	regulation of trophoblast cell migration	2	6	0.19477	0.606994	1	0.895296	1
GO:1901223	negative regulation of non-canonical NF-kappaB signal transduction	2	6	0.19477	0.606994	1	0.895296	1
GO:1902165	regulation of intrinsic apoptotic signaling pathway in response to DNA damage by p53 class mediator	2	6	0.19477	0.606994	1	0.895296	1
GO:1903719	regulation of I-kappaB phosphorylation	2	6	0.19477	0.606994	1	0.895296	1
GO:2000008	regulation of protein localization to cell surface	2	6	0.19477	0.606994	1	0.895296	1
GO:2000010	positive regulation of protein localization to cell surface	2	6	0.19477	0.606994	1	0.895296	1
GO:0034101	erythrocyte homeostasis	7	35	0.19626	0.611147	1	1	1
GO:0050918	positive chemotaxis	4	17	0.19703	0.612561	1	0.895296	1
GO:1903426	regulation of reactive oxygen species biosynthetic process	4	17	0.19703	0.612561	1	0.895296	1
GO:0045619	regulation of lymphocyte differentiation	14	80	0.1991	0.618226	1	1	1
GO:0042267	natural killer cell mediated cytotoxicity	6	29	0.19933	0.618226	1	0.895296	1
GO:0046633	alpha-beta T cell proliferation	6	29	0.19933	0.618226	1	0.895296	1
GO:0043903	regulation of biological process involved in symbiotic interaction	5	23	0.20029	0.619717	1	0.895296	1
GO:0097028	dendritic cell differentiation	5	23	0.20029	0.619717	1	1	1
GO:1903556	negative regulation of tumor necrosis factor superfamily cytokine production	5	23	0.20029	0.619717	1	0.895296	1
GO:0051092	positive regulation of NF-kappaB transcription factor activity	9	48	0.20465	0.631727	1	0.895296	1
GO:1902107	positive regulation of leukocyte differentiation	15	87	0.20466	0.631727	1	1	1
GO:1903708	positive regulation of hemopoiesis	15	87	0.20466	0.631727	1	1	1
GO:0034765	regulation of monoatomic ion transmembrane transport	11	61	0.20727	0.639275	1	1	1
GO:0032615	interleukin-12 production	8	42	0.21104	0.649869	1	0.895296	1
GO:0050728	negative regulation of inflammatory response	8	42	0.21104	0.649869	1	1	1
GO:0002456	T cell mediated immunity	10	55	0.2149	0.65369	1	0.895296	1
GO:0050851	antigen receptor-mediated signaling pathway	10	55	0.2149	0.65369	1	1	1
GO:0043409	negative regulation of MAPK cascade	7	36	0.21713	0.65369	1	0.895296	1
GO:0051046	regulation of secretion	19	115	0.22085	0.65369	1	1	1
GO:0006691	leukotriene metabolic process	3	12	0.22211	0.65369	1	0.895296	1
GO:0043302	positive regulation of leukocyte degranulation	3	12	0.22211	0.65369	1	1	1
GO:0045579	positive regulation of B cell differentiation	3	12	0.22211	0.65369	1	0.895296	1
GO:0061097	regulation of protein tyrosine kinase activity	3	12	0.22211	0.65369	1	0.895296	1
GO:0002228	natural killer cell mediated immunity	6	30	0.22258	0.65369	1	0.895296	1
GO:0006690	icosanoid metabolic process	6	30	0.22258	0.65369	1	0.895296	1
GO:0032735	positive regulation of interleukin-12 production	6	30	0.22258	0.65369	1	0.895296	1
GO:0045123	cellular extravasation	6	30	0.22258	0.65369	1	0.895296	1
GO:2000146	negative regulation of cell motility	11	62	0.22337	0.65369	1	0.895296	1
GO:1904892	regulation of receptor signaling pathway via STAT	5	24	0.22667	0.65369	1	0.895296	1
GO:0001773	myeloid dendritic cell activation	4	18	0.22786	0.65369	1	1	1
GO:0097553	calcium ion transmembrane import into cytosol	8	43	0.23073	0.65369	1	0.895296	1
GO:0007154	cell communication	119	831	0.23211	0.65369	1	1	1
GO:0023052	signaling	119	831	0.23211	0.65369	1	1	1
GO:0007204	positive regulation of cytosolic calcium ion concentration	10	56	0.23219	0.65369	1	0.895296	1
GO:0040013	negative regulation of locomotion	11	63	0.23997	0.65369	1	1	1
GO:0010629	negative regulation of gene expression	34	220	0.24156	0.65369	1	1	1
GO:0006816	calcium ion transport	14	83	0.24157	0.65369	1	0.895296	1
GO:0030098	lymphocyte differentiation	24	151	0.24358	0.65369	1	1	1
GO:0009967	positive regulation of signal transduction	52	347	0.24504	0.65369	1	1	1
GO:0002244	hematopoietic progenitor cell differentiation	6	31	0.24668	0.65369	1	0.895296	1
GO:0007584	response to nutrient	6	31	0.24668	0.65369	1	0.895296	1
GO:0030218	erythrocyte differentiation	6	31	0.24668	0.65369	1	1	1
GO:0000041	transition metal ion transport	2	7	0.24912	0.65369	1	0.895296	1
GO:0002486	antigen processing and presentation of endogenous peptide antigen via MHC class I via ER pathway, TAP-independent	2	7	0.24912	0.65369	1	0.895296	1
GO:0002517	T cell tolerance induction	2	7	0.24912	0.65369	1	0.895296	1
GO:0002551	mast cell chemotaxis	2	7	0.24912	0.65369	1	0.895296	1
GO:0006022	aminoglycan metabolic process	2	7	0.24912	0.65369	1	1	1
GO:0016540	protein autoprocessing	2	7	0.24912	0.65369	1	0.895296	1
GO:0030203	glycosaminoglycan metabolic process	2	7	0.24912	0.65369	1	1	1
GO:0032762	mast cell cytokine production	2	7	0.24912	0.65369	1	0.895296	1
GO:0032801	receptor catabolic process	2	7	0.24912	0.65369	1	0.895296	1
GO:0033034	positive regulation of myeloid cell apoptotic process	2	7	0.24912	0.65369	1	0.895296	1
GO:0034112	positive regulation of homotypic cell-cell adhesion	2	7	0.24912	0.65369	1	0.895296	1
GO:0034135	regulation of toll-like receptor 2 signaling pathway	2	7	0.24912	0.65369	1	0.895296	1
GO:0034331	cell junction maintenance	2	7	0.24912	0.65369	1	0.895296	1
GO:0035821	modulation of process of another organism	2	7	0.24912	0.65369	1	0.895296	1
GO:0036462	TRAIL-activated apoptotic signaling pathway	2	7	0.24912	0.65369	1	0.895296	1
GO:0044788	modulation by host of viral process	2	7	0.24912	0.65369	1	0.895296	1
GO:0045655	regulation of monocyte differentiation	2	7	0.24912	0.65369	1	0.895296	1
GO:0045742	positive regulation of epidermal growth factor receptor signaling pathway	2	7	0.24912	0.65369	1	0.895296	1
GO:0046782	regulation of viral transcription	2	7	0.24912	0.65369	1	0.895296	1
GO:0051709	regulation of killing of cells of another organism	2	7	0.24912	0.65369	1	0.895296	1
GO:0061077	chaperone-mediated protein folding	2	7	0.24912	0.65369	1	0.895296	1
GO:0061518	microglial cell proliferation	2	7	0.24912	0.65369	1	0.895296	1
GO:0070486	leukocyte aggregation	2	7	0.24912	0.65369	1	0.895296	1
GO:0070944	neutrophil-mediated killing of bacterium	2	7	0.24912	0.65369	1	0.895296	1
GO:0071360	cellular response to exogenous dsRNA	2	7	0.24912	0.65369	1	0.895296	1
GO:0071526	semaphorin-plexin signaling pathway	2	7	0.24912	0.65369	1	0.895296	1
GO:0071676	negative regulation of mononuclear cell migration	2	7	0.24912	0.65369	1	0.895296	1
GO:0071888	macrophage apoptotic process	2	7	0.24912	0.65369	1	0.895296	1
GO:0072111	cell proliferation involved in kidney development	2	7	0.24912	0.65369	1	0.895296	1
GO:0090313	regulation of protein targeting to membrane	2	7	0.24912	0.65369	1	0.895296	1
GO:0106014	regulation of inflammatory response to wounding	2	7	0.24912	0.65369	1	0.895296	1
GO:1901797	negative regulation of signal transduction by p53 class mediator	2	7	0.24912	0.65369	1	0.895296	1
GO:1901857	positive regulation of cellular respiration	2	7	0.24912	0.65369	1	0.895296	1
GO:1902254	negative regulation of intrinsic apoptotic signaling pathway by p53 class mediator	2	7	0.24912	0.65369	1	0.895296	1
GO:1903510	mucopolysaccharide metabolic process	2	7	0.24912	0.65369	1	1	1
GO:1903978	regulation of microglial cell activation	2	7	0.24912	0.65369	1	0.895296	1
GO:2000109	regulation of macrophage apoptotic process	2	7	0.24912	0.65369	1	0.895296	1
GO:2000508	regulation of dendritic cell chemotaxis	2	7	0.24912	0.65369	1	0.895296	1
GO:2001185	regulation of CD8-positive, alpha-beta T cell activation	2	7	0.24912	0.65369	1	0.895296	1
GO:0070227	lymphocyte apoptotic process	8	44	0.25105	0.65369	1	1	1
GO:0042127	regulation of cell population proliferation	54	362	0.25154	0.65369	1	1	1
GO:0046006	regulation of activated T cell proliferation	5	25	0.25402	0.65369	1	0.895296	1
GO:0070232	regulation of T cell apoptotic process	5	25	0.25402	0.65369	1	0.895296	1
GO:0001766	membrane raft polarization	1	2	0.25659	0.65369	1	0.895296	1
GO:0001923	B-1 B cell differentiation	1	2	0.25659	0.65369	1	0.895296	1
GO:0002232	leukocyte chemotaxis involved in inflammatory response	1	2	0.25659	0.65369	1	0.895296	1
GO:0002309	T cell proliferation involved in immune response	1	2	0.25659	0.65369	1	0.895296	1
GO:0002322	B cell proliferation involved in immune response	1	2	0.25659	0.65369	1	0.895296	1
GO:0002351	serotonin production involved in inflammatory response	1	2	0.25659	0.65369	1	0.895296	1
GO:0002442	serotonin secretion involved in inflammatory response	1	2	0.25659	0.65369	1	0.895296	1
GO:0002457	T cell antigen processing and presentation	1	2	0.25659	0.65369	1	0.895296	1
GO:0002518	lymphocyte chemotaxis across high endothelial venule	1	2	0.25659	0.65369	1	0.895296	1
GO:0002554	serotonin secretion by platelet	1	2	0.25659	0.65369	1	0.895296	1
GO:0002572	pro-T cell differentiation	1	2	0.25659	0.65369	1	0.895296	1
GO:0002581	negative regulation of antigen processing and presentation of peptide or polysaccharide antigen via MHC class II	1	2	0.25659	0.65369	1	0.895296	1
GO:0002669	positive regulation of T cell anergy	1	2	0.25659	0.65369	1	0.895296	1
GO:0002725	negative regulation of T cell cytokine production	1	2	0.25659	0.65369	1	0.895296	1
GO:0002774	Fc receptor mediated inhibitory signaling pathway	1	2	0.25659	0.65369	1	0.895296	1
GO:0002856	negative regulation of natural killer cell mediated immune response to tumor cell	1	2	0.25659	0.65369	1	0.895296	1
GO:0002859	negative regulation of natural killer cell mediated cytotoxicity directed against tumor cell target	1	2	0.25659	0.65369	1	0.895296	1
GO:0002884	negative regulation of hypersensitivity	1	2	0.25659	0.65369	1	0.895296	1
GO:0002913	positive regulation of lymphocyte anergy	1	2	0.25659	0.65369	1	0.895296	1
GO:0002941	synoviocyte proliferation	1	2	0.25659	0.65369	1	0.895296	1
GO:0003340	negative regulation of mesenchymal to epithelial transition involved in metanephros morphogenesis	1	2	0.25659	0.65369	1	0.895296	1
GO:0003401	axis elongation	1	2	0.25659	0.65369	1	0.895296	1
GO:0006399	tRNA metabolic process	1	2	0.25659	0.65369	1	0.895296	1
GO:0006904	vesicle docking involved in exocytosis	1	2	0.25659	0.65369	1	0.895296	1
GO:0007212	G protein-coupled dopamine receptor signaling pathway	1	2	0.25659	0.65369	1	0.895296	1
GO:0007614	short-term memory	1	2	0.25659	0.65369	1	0.895296	1
GO:0010518	positive regulation of phospholipase activity	1	2	0.25659	0.65369	1	0.895296	1
GO:0010561	negative regulation of glycoprotein biosynthetic process	1	2	0.25659	0.65369	1	0.895296	1
GO:0010760	negative regulation of macrophage chemotaxis	1	2	0.25659	0.65369	1	0.895296	1
GO:0010889	regulation of sequestering of triglyceride	1	2	0.25659	0.65369	1	0.895296	1
GO:0010911	regulation of isomerase activity	1	2	0.25659	0.65369	1	0.895296	1
GO:0010912	positive regulation of isomerase activity	1	2	0.25659	0.65369	1	0.895296	1
GO:0010998	regulation of translational initiation by eIF2 alpha phosphorylation	1	2	0.25659	0.65369	1	0.895296	1
GO:0015802	basic amino acid transport	1	2	0.25659	0.65369	1	0.895296	1
GO:0021534	cell proliferation in hindbrain	1	2	0.25659	0.65369	1	0.895296	1
GO:0021602	cranial nerve morphogenesis	1	2	0.25659	0.65369	1	0.895296	1
GO:0021626	central nervous system maturation	1	2	0.25659	0.65369	1	0.895296	1
GO:0030046	parallel actin filament bundle assembly	1	2	0.25659	0.65369	1	0.895296	1
GO:0030223	neutrophil differentiation	1	2	0.25659	0.65369	1	0.895296	1
GO:0030845	phospholipase C-inhibiting G protein-coupled receptor signaling pathway	1	2	0.25659	0.65369	1	0.895296	1
GO:0031536	positive regulation of exit from mitosis	1	2	0.25659	0.65369	1	0.895296	1
GO:0031580	membrane raft distribution	1	2	0.25659	0.65369	1	0.895296	1
GO:0032237	activation of store-operated calcium channel activity	1	2	0.25659	0.65369	1	0.895296	1
GO:0032499	detection of peptidoglycan	1	2	0.25659	0.65369	1	0.895296	1
GO:0032701	negative regulation of interleukin-18 production	1	2	0.25659	0.65369	1	0.895296	1
GO:0032707	negative regulation of interleukin-23 production	1	2	0.25659	0.65369	1	0.895296	1
GO:0032714	negative regulation of interleukin-5 production	1	2	0.25659	0.65369	1	0.895296	1
GO:0032764	negative regulation of mast cell cytokine production	1	2	0.25659	0.65369	1	0.895296	1
GO:0032911	negative regulation of transforming growth factor beta1 production	1	2	0.25659	0.65369	1	0.895296	1
GO:0032957	inositol trisphosphate metabolic process	1	2	0.25659	0.65369	1	0.895296	1
GO:0032959	inositol trisphosphate biosynthetic process	1	2	0.25659	0.65369	1	0.895296	1
GO:0033023	mast cell homeostasis	1	2	0.25659	0.65369	1	0.895296	1
GO:0033024	mast cell apoptotic process	1	2	0.25659	0.65369	1	0.895296	1
GO:0033025	regulation of mast cell apoptotic process	1	2	0.25659	0.65369	1	0.895296	1
GO:0033026	negative regulation of mast cell apoptotic process	1	2	0.25659	0.65369	1	0.895296	1
GO:0033197	response to vitamin E	1	2	0.25659	0.65369	1	0.895296	1
GO:0033212	iron import into cell	1	2	0.25659	0.65369	1	0.895296	1
GO:0033239	negative regulation of amine metabolic process	1	2	0.25659	0.65369	1	0.895296	1
GO:0033591	response to L-ascorbic acid	1	2	0.25659	0.65369	1	0.895296	1
GO:0034384	high-density lipoprotein particle clearance	1	2	0.25659	0.65369	1	0.895296	1
GO:0035335	peptidyl-tyrosine dephosphorylation	1	2	0.25659	0.65369	1	0.895296	1
GO:0035685	helper T cell diapedesis	1	2	0.25659	0.65369	1	0.895296	1
GO:0035691	macrophage migration inhibitory factor signaling pathway	1	2	0.25659	0.65369	1	0.895296	1
GO:0035700	astrocyte chemotaxis	1	2	0.25659	0.65369	1	0.895296	1
GO:0036483	neuron intrinsic apoptotic signaling pathway in response to endoplasmic reticulum stress	1	2	0.25659	0.65369	1	0.895296	1
GO:0039533	regulation of MDA-5 signaling pathway	1	2	0.25659	0.65369	1	0.895296	1
GO:0039534	negative regulation of MDA-5 signaling pathway	1	2	0.25659	0.65369	1	0.895296	1
GO:0039536	negative regulation of RIG-I signaling pathway	1	2	0.25659	0.65369	1	0.895296	1
GO:0042117	monocyte activation	1	2	0.25659	0.65369	1	0.895296	1
GO:0042440	pigment metabolic process	1	2	0.25659	0.65369	1	0.895296	1
GO:0042496	detection of diacyl bacterial lipopeptide	1	2	0.25659	0.65369	1	0.895296	1
GO:0043314	negative regulation of neutrophil degranulation	1	2	0.25659	0.65369	1	0.895296	1
GO:0043376	regulation of CD8-positive, alpha-beta T cell differentiation	1	2	0.25659	0.65369	1	0.895296	1
GO:0043378	positive regulation of CD8-positive, alpha-beta T cell differentiation	1	2	0.25659	0.65369	1	0.895296	1
GO:0043558	regulation of translational initiation in response to stress	1	2	0.25659	0.65369	1	0.895296	1
GO:0044828	negative regulation by host of viral genome replication	1	2	0.25659	0.65369	1	0.895296	1
GO:0045109	intermediate filament organization	1	2	0.25659	0.65369	1	0.895296	1
GO:0045341	MHC class I biosynthetic process	1	2	0.25659	0.65369	1	0.895296	1
GO:0045343	regulation of MHC class I biosynthetic process	1	2	0.25659	0.65369	1	0.895296	1
GO:0045345	positive regulation of MHC class I biosynthetic process	1	2	0.25659	0.65369	1	0.895296	1
GO:0045578	negative regulation of B cell differentiation	1	2	0.25659	0.65369	1	0.895296	1
GO:0045626	negative regulation of T-helper 1 cell differentiation	1	2	0.25659	0.65369	1	0.895296	1
GO:0045656	negative regulation of monocyte differentiation	1	2	0.25659	0.65369	1	0.895296	1
GO:0045914	negative regulation of catecholamine metabolic process	1	2	0.25659	0.65369	1	0.895296	1
GO:0045963	negative regulation of dopamine metabolic process	1	2	0.25659	0.65369	1	0.895296	1
GO:0046794	transport of virus	1	2	0.25659	0.65369	1	0.895296	1
GO:0046856	phosphatidylinositol dephosphorylation	1	2	0.25659	0.65369	1	0.895296	1
GO:0046967	cytosol to endoplasmic reticulum transport	1	2	0.25659	0.65369	1	0.895296	1
GO:0048539	bone marrow development	1	2	0.25659	0.65369	1	0.895296	1
GO:0048642	negative regulation of skeletal muscle tissue development	1	2	0.25659	0.65369	1	0.895296	1
GO:0048712	negative regulation of astrocyte differentiation	1	2	0.25659	0.65369	1	0.895296	1
GO:0051045	negative regulation of membrane protein ectodomain proteolysis	1	2	0.25659	0.65369	1	0.895296	1
GO:0051764	actin crosslink formation	1	2	0.25659	0.65369	1	0.895296	1
GO:0060054	positive regulation of epithelial cell proliferation involved in wound healing	1	2	0.25659	0.65369	1	0.895296	1
GO:0060148	positive regulation of post-transcriptional gene silencing	1	2	0.25659	0.65369	1	0.895296	1
GO:0060309	elastin catabolic process	1	2	0.25659	0.65369	1	0.895296	1
GO:0060369	positive regulation of Fc receptor mediated stimulatory signaling pathway	1	2	0.25659	0.65369	1	0.895296	1
GO:0060375	regulation of mast cell differentiation	1	2	0.25659	0.65369	1	0.895296	1
GO:0060376	positive regulation of mast cell differentiation	1	2	0.25659	0.65369	1	0.895296	1
GO:0060442	branching involved in prostate gland morphogenesis	1	2	0.25659	0.65369	1	0.895296	1
GO:0060602	branch elongation of an epithelium	1	2	0.25659	0.65369	1	0.895296	1
GO:0060754	positive regulation of mast cell chemotaxis	1	2	0.25659	0.65369	1	0.895296	1
GO:0061302	smooth muscle cell-matrix adhesion	1	2	0.25659	0.65369	1	0.895296	1
GO:0061520	Langerhans cell differentiation	1	2	0.25659	0.65369	1	0.895296	1
GO:0061687	detoxification of inorganic compound	1	2	0.25659	0.65369	1	0.895296	1
GO:0070086	ubiquitin-dependent endocytosis	1	2	0.25659	0.65369	1	0.895296	1
GO:0070100	negative regulation of chemokine-mediated signaling pathway	1	2	0.25659	0.65369	1	0.895296	1
GO:0070101	positive regulation of chemokine-mediated signaling pathway	1	2	0.25659	0.65369	1	0.895296	1
GO:0070162	adiponectin secretion	1	2	0.25659	0.65369	1	0.895296	1
GO:0070163	regulation of adiponectin secretion	1	2	0.25659	0.65369	1	0.895296	1
GO:0070170	regulation of tooth mineralization	1	2	0.25659	0.65369	1	0.895296	1
GO:0070173	regulation of enamel mineralization	1	2	0.25659	0.65369	1	0.895296	1
GO:0070344	regulation of fat cell proliferation	1	2	0.25659	0.65369	1	0.895296	1
GO:0070345	negative regulation of fat cell proliferation	1	2	0.25659	0.65369	1	0.895296	1
GO:0070946	neutrophil-mediated killing of gram-positive bacterium	1	2	0.25659	0.65369	1	0.895296	1
GO:0070948	regulation of neutrophil mediated cytotoxicity	1	2	0.25659	0.65369	1	0.895296	1
GO:0070949	regulation of neutrophil mediated killing of symbiont cell	1	2	0.25659	0.65369	1	0.895296	1
GO:0071243	cellular response to arsenic-containing substance	1	2	0.25659	0.65369	1	0.895296	1
GO:0071711	basement membrane organization	1	2	0.25659	0.65369	1	0.895296	1
GO:0072257	metanephric nephron tubule epithelial cell differentiation	1	2	0.25659	0.65369	1	0.895296	1
GO:0072307	regulation of metanephric nephron tubule epithelial cell differentiation	1	2	0.25659	0.65369	1	0.895296	1
GO:0072673	lamellipodium morphogenesis	1	2	0.25659	0.65369	1	0.895296	1
GO:0072718	response to cisplatin	1	2	0.25659	0.65369	1	0.895296	1
GO:0072719	cellular response to cisplatin	1	2	0.25659	0.65369	1	0.895296	1
GO:0090402	oncogene-induced cell senescence	1	2	0.25659	0.65369	1	0.895296	1
GO:0090674	endothelial cell-matrix adhesion via fibronectin	1	2	0.25659	0.65369	1	0.895296	1
GO:0097070	ductus arteriosus closure	1	2	0.25659	0.65369	1	0.895296	1
GO:0097094	craniofacial suture morphogenesis	1	2	0.25659	0.65369	1	0.895296	1
GO:0097168	mesenchymal stem cell proliferation	1	2	0.25659	0.65369	1	0.895296	1
GO:0097368	establishment of Sertoli cell barrier	1	2	0.25659	0.65369	1	0.895296	1
GO:0106016	positive regulation of inflammatory response to wounding	1	2	0.25659	0.65369	1	0.895296	1
GO:0110096	cellular response to aldehyde	1	2	0.25659	0.65369	1	0.895296	1
GO:0140447	cytokine precursor processing	1	2	0.25659	0.65369	1	0.895296	1
GO:1900099	negative regulation of plasma cell differentiation	1	2	0.25659	0.65369	1	0.895296	1
GO:1900147	regulation of Schwann cell migration	1	2	0.25659	0.65369	1	0.895296	1
GO:1900223	positive regulation of amyloid-beta clearance	1	2	0.25659	0.65369	1	0.895296	1
GO:1900370	positive regulation of post-transcriptional gene silencing by RNA	1	2	0.25659	0.65369	1	0.895296	1
GO:1901016	regulation of potassium ion transmembrane transporter activity	1	2	0.25659	0.65369	1	0.895296	1
GO:1901339	regulation of store-operated calcium channel activity	1	2	0.25659	0.65369	1	0.895296	1
GO:1901341	positive regulation of store-operated calcium channel activity	1	2	0.25659	0.65369	1	0.895296	1
GO:1901624	negative regulation of lymphocyte chemotaxis	1	2	0.25659	0.65369	1	0.895296	1
GO:1901645	regulation of synoviocyte proliferation	1	2	0.25659	0.65369	1	0.895296	1
GO:1901647	positive regulation of synoviocyte proliferation	1	2	0.25659	0.65369	1	0.895296	1
GO:1901740	negative regulation of myoblast fusion	1	2	0.25659	0.65369	1	0.895296	1
GO:1901894	regulation of ATPase-coupled calcium transmembrane transporter activity	1	2	0.25659	0.65369	1	0.895296	1
GO:1902044	regulation of Fas signaling pathway	1	2	0.25659	0.65369	1	0.895296	1
GO:1902226	regulation of macrophage colony-stimulating factor signaling pathway	1	2	0.25659	0.65369	1	0.895296	1
GO:1902460	regulation of mesenchymal stem cell proliferation	1	2	0.25659	0.65369	1	0.895296	1
GO:1902462	positive regulation of mesenchymal stem cell proliferation	1	2	0.25659	0.65369	1	0.895296	1
GO:1902947	regulation of tau-protein kinase activity	1	2	0.25659	0.65369	1	0.895296	1
GO:1903238	positive regulation of leukocyte tethering or rolling	1	2	0.25659	0.65369	1	0.895296	1
GO:1903381	regulation of endoplasmic reticulum stress-induced neuron intrinsic apoptotic signaling pathway	1	2	0.25659	0.65369	1	0.895296	1
GO:1903487	regulation of lactation	1	2	0.25659	0.65369	1	0.895296	1
GO:1903575	cornified envelope assembly	1	2	0.25659	0.65369	1	0.895296	1
GO:1903589	positive regulation of blood vessel endothelial cell proliferation involved in sprouting angiogenesis	1	2	0.25659	0.65369	1	0.895296	1
GO:1903753	negative regulation of p38MAPK cascade	1	2	0.25659	0.65369	1	0.895296	1
GO:1903800	positive regulation of miRNA processing	1	2	0.25659	0.65369	1	0.895296	1
GO:1903826	L-arginine transmembrane transport	1	2	0.25659	0.65369	1	0.895296	1
GO:1903980	positive regulation of microglial cell activation	1	2	0.25659	0.65369	1	0.895296	1
GO:1904073	regulation of trophectodermal cell proliferation	1	2	0.25659	0.65369	1	0.895296	1
GO:1904075	positive regulation of trophectodermal cell proliferation	1	2	0.25659	0.65369	1	0.895296	1
GO:1904093	negative regulation of autophagic cell death	1	2	0.25659	0.65369	1	0.895296	1
GO:1904444	regulation of establishment of Sertoli cell barrier	1	2	0.25659	0.65369	1	0.895296	1
GO:1904904	regulation of endothelial cell-matrix adhesion via fibronectin	1	2	0.25659	0.65369	1	0.895296	1
GO:1905034	regulation of antifungal innate immune response	1	2	0.25659	0.65369	1	0.895296	1
GO:1905036	positive regulation of antifungal innate immune response	1	2	0.25659	0.65369	1	0.895296	1
GO:1905049	negative regulation of metallopeptidase activity	1	2	0.25659	0.65369	1	0.895296	1
GO:1905219	regulation of platelet formation	1	2	0.25659	0.65369	1	0.895296	1
GO:1905453	regulation of myeloid progenitor cell differentiation	1	2	0.25659	0.65369	1	0.895296	1
GO:1905634	regulation of protein localization to chromatin	1	2	0.25659	0.65369	1	0.895296	1
GO:1905806	regulation of synapse pruning	1	2	0.25659	0.65369	1	0.895296	1
GO:1905907	negative regulation of amyloid fibril formation	1	2	0.25659	0.65369	1	0.895296	1
GO:1990822	basic amino acid transmembrane transport	1	2	0.25659	0.65369	1	0.895296	1
GO:2000097	regulation of smooth muscle cell-matrix adhesion	1	2	0.25659	0.65369	1	0.895296	1
GO:2000348	regulation of CD40 signaling pathway	1	2	0.25659	0.65369	1	0.895296	1
GO:2000392	regulation of lamellipodium morphogenesis	1	2	0.25659	0.65369	1	0.895296	1
GO:2000409	positive regulation of T cell extravasation	1	2	0.25659	0.65369	1	0.895296	1
GO:2000410	regulation of thymocyte migration	1	2	0.25659	0.65369	1	0.895296	1
GO:2000412	positive regulation of thymocyte migration	1	2	0.25659	0.65369	1	0.895296	1
GO:2000446	regulation of macrophage migration inhibitory factor signaling pathway	1	2	0.25659	0.65369	1	0.895296	1
GO:2000448	positive regulation of macrophage migration inhibitory factor signaling pathway	1	2	0.25659	0.65369	1	0.895296	1
GO:2000451	positive regulation of CD8-positive, alpha-beta T cell extravasation	1	2	0.25659	0.65369	1	0.895296	1
GO:2000458	regulation of astrocyte chemotaxis	1	2	0.25659	0.65369	1	0.895296	1
GO:2000521	negative regulation of immunological synapse formation	1	2	0.25659	0.65369	1	0.895296	1
GO:2000523	regulation of T cell costimulation	1	2	0.25659	0.65369	1	0.895296	1
GO:2000634	regulation of primary miRNA processing	1	2	0.25659	0.65369	1	0.895296	1
GO:2000637	positive regulation of miRNA-mediated gene silencing	1	2	0.25659	0.65369	1	0.895296	1
GO:2000646	positive regulation of receptor catabolic process	1	2	0.25659	0.65369	1	0.895296	1
GO:2000670	positive regulation of dendritic cell apoptotic process	1	2	0.25659	0.65369	1	0.895296	1
GO:2001044	regulation of integrin-mediated signaling pathway	1	2	0.25659	0.65369	1	0.895296	1
GO:2001186	negative regulation of CD8-positive, alpha-beta T cell activation	1	2	0.25659	0.65369	1	0.895296	1
GO:2001189	negative regulation of T cell activation via T cell receptor contact with antigen bound to MHC molecule on antigen presenting cell	1	2	0.25659	0.65369	1	0.895296	1
GO:2001241	positive regulation of extrinsic apoptotic signaling pathway in absence of ligand	1	2	0.25659	0.65369	1	0.895296	1
GO:0016311	dephosphorylation	4	19	0.25982	0.658668	1	0.896067	1
GO:0019080	viral gene expression	4	19	0.25982	0.658668	1	0.896067	1
GO:0043030	regulation of macrophage activation	4	19	0.25982	0.658668	1	0.896067	1
GO:0030036	actin cytoskeleton organization	15	91	0.26042	0.658668	1	0.896067	1
GO:0048519	negative regulation of biological process	97	673	0.2605	0.658668	1	1	1
GO:0006611	protein export from nucleus	3	13	0.26143	0.658668	1	0.896067	1
GO:0007566	embryo implantation	3	13	0.26143	0.658668	1	0.896067	1
GO:0010575	positive regulation of vascular endothelial growth factor production	3	13	0.26143	0.658668	1	0.896067	1
GO:0032695	negative regulation of interleukin-12 production	3	13	0.26143	0.658668	1	0.896067	1
GO:0032964	collagen biosynthetic process	3	13	0.26143	0.658668	1	0.896067	1
GO:0032965	regulation of collagen biosynthetic process	3	13	0.26143	0.658668	1	0.896067	1
GO:0033198	response to ATP	3	13	0.26143	0.658668	1	0.896067	1
GO:0035739	CD4-positive, alpha-beta T cell proliferation	3	13	0.26143	0.658668	1	0.896067	1
GO:0036336	dendritic cell migration	3	13	0.26143	0.658668	1	0.896067	1
GO:0050732	negative regulation of peptidyl-tyrosine phosphorylation	3	13	0.26143	0.658668	1	0.896067	1
GO:1905332	positive regulation of morphogenesis of an epithelium	3	13	0.26143	0.658668	1	0.896067	1
GO:2000515	negative regulation of CD4-positive, alpha-beta T cell activation	3	13	0.26143	0.658668	1	0.896067	1
GO:0043410	positive regulation of MAPK cascade	21	132	0.26225	0.660103	1	1	1
GO:0065009	regulation of molecular function	51	342	0.26234	0.660103	1	1	1
GO:0007249	canonical NF-kappaB signal transduction	17	105	0.26667	0.670564	1	1	1
GO:0072593	reactive oxygen species metabolic process	13	78	0.26767	0.672642	1	1	1
GO:0030155	regulation of cell adhesion	32	209	0.27072	0.679602	1	1	1
GO:0060284	regulation of cell development	33	216	0.27079	0.679602	1	1	1
GO:0050679	positive regulation of epithelial cell proliferation	9	52	0.28032	0.702611	1	0.949076	1
GO:1904062	regulation of monoatomic cation transmembrane transport	9	52	0.28032	0.702611	1	0.949076	1
GO:0051130	positive regulation of cellular component organization	35	231	0.28064	0.702959	1	1	1
GO:0008154	actin polymerization or depolymerization	5	26	0.28214	0.705805	1	0.953574	1
GO:0030890	positive regulation of B cell proliferation	5	26	0.28214	0.705805	1	0.953574	1
GO:1901700	response to oxygen-containing compound	55	373	0.2838	0.709493	1	1	1
GO:0050852	T cell receptor signaling pathway	7	39	0.28398	0.709493	1	1	1
GO:0030336	negative regulation of cell migration	10	59	0.28697	0.715581	1	0.959826	1
GO:0042102	positive regulation of T cell proliferation	10	59	0.28697	0.715581	1	0.959826	1
GO:0097696	cell surface receptor signaling pathway via STAT	10	59	0.28697	0.715581	1	0.959826	1
GO:0045785	positive regulation of cell adhesion	25	162	0.29063	0.724242	1	0.959826	1
GO:0032088	negative regulation of NF-kappaB transcription factor activity	4	20	0.29258	0.726767	1	0.959826	1
GO:0045661	regulation of myoblast differentiation	4	20	0.29258	0.726767	1	0.959826	1
GO:0046596	regulation of viral entry into host cell	4	20	0.29258	0.726767	1	0.959826	1
GO:0051279	regulation of release of sequestered calcium ion into cytosol	4	20	0.29258	0.726767	1	0.959826	1
GO:0061756	leukocyte adhesion to vascular endothelial cell	4	20	0.29258	0.726767	1	0.959826	1
GO:0002377	immunoglobulin production	8	46	0.29328	0.72804	1	1	1
GO:0030001	metal ion transport	17	107	0.29484	0.731445	1	0.959826	1
GO:0008284	positive regulation of cell population proliferation	38	254	0.29927	0.73317	1	0.959826	1
GO:0019725	cellular homeostasis	22	142	0.30104	0.73317	1	1	1
GO:0001916	positive regulation of T cell mediated cytotoxicity	3	14	0.30153	0.73317	1	0.959826	1
GO:0006457	protein folding	3	14	0.30153	0.73317	1	0.959826	1
GO:0006879	intracellular iron ion homeostasis	3	14	0.30153	0.73317	1	0.959826	1
GO:0010596	negative regulation of endothelial cell migration	3	14	0.30153	0.73317	1	0.959826	1
GO:0010712	regulation of collagen metabolic process	3	14	0.30153	0.73317	1	0.959826	1
GO:0030857	negative regulation of epithelial cell differentiation	3	14	0.30153	0.73317	1	0.959826	1
GO:0031529	ruffle organization	3	14	0.30153	0.73317	1	0.959826	1
GO:0032740	positive regulation of interleukin-17 production	3	14	0.30153	0.73317	1	0.959826	1
GO:0042771	intrinsic apoptotic signaling pathway in response to DNA damage by p53 class mediator	3	14	0.30153	0.73317	1	0.959826	1
GO:0045061	thymic T cell selection	3	14	0.30153	0.73317	1	0.959826	1
GO:0046636	negative regulation of alpha-beta T cell activation	3	14	0.30153	0.73317	1	0.959826	1
GO:0051452	intracellular pH reduction	3	14	0.30153	0.73317	1	0.959826	1
GO:0070230	positive regulation of lymphocyte apoptotic process	3	14	0.30153	0.73317	1	0.959826	1
GO:1900744	regulation of p38MAPK cascade	3	14	0.30153	0.73317	1	0.959826	1
GO:1903307	positive regulation of regulated secretory pathway	3	14	0.30153	0.73317	1	1	1
GO:0031325	positive regulation of cellular metabolic process	76	526	0.30235	0.73317	1	1	1
GO:0002428	antigen processing and presentation of peptide antigen via MHC class Ib	2	8	0.30385	0.73317	1	0.959826	1
GO:0002431	Fc receptor mediated stimulatory signaling pathway	2	8	0.30385	0.73317	1	0.959826	1
GO:0002475	antigen processing and presentation via MHC class Ib	2	8	0.30385	0.73317	1	0.959826	1
GO:0002476	antigen processing and presentation of endogenous peptide antigen via MHC class Ib	2	8	0.30385	0.73317	1	0.959826	1
GO:0002484	antigen processing and presentation of endogenous peptide antigen via MHC class I via ER pathway	2	8	0.30385	0.73317	1	0.959826	1
GO:0002544	chronic inflammatory response	2	8	0.30385	0.73317	1	0.959826	1
GO:0022617	extracellular matrix disassembly	2	8	0.30385	0.73317	1	0.959826	1
GO:0032069	regulation of nuclease activity	2	8	0.30385	0.73317	1	1	1
GO:0033622	integrin activation	2	8	0.30385	0.73317	1	0.959826	1
GO:0034350	regulation of glial cell apoptotic process	2	8	0.30385	0.73317	1	0.959826	1
GO:0034394	protein localization to cell surface	2	8	0.30385	0.73317	1	0.959826	1
GO:0035771	interleukin-4-mediated signaling pathway	2	8	0.30385	0.73317	1	0.959826	1
GO:0042730	fibrinolysis	2	8	0.30385	0.73317	1	0.959826	1
GO:0045745	positive regulation of G protein-coupled receptor signaling pathway	2	8	0.30385	0.73317	1	0.959826	1
GO:0046173	polyol biosynthetic process	2	8	0.30385	0.73317	1	0.959826	1
GO:0051873	killing by host of symbiont cells	2	8	0.30385	0.73317	1	0.959826	1
GO:0061517	macrophage proliferation	2	8	0.30385	0.73317	1	0.959826	1
GO:0070306	lens fiber cell differentiation	2	8	0.30385	0.73317	1	0.959826	1
GO:0070942	neutrophil mediated cytotoxicity	2	8	0.30385	0.73317	1	0.959826	1
GO:0070943	neutrophil-mediated killing of symbiont cell	2	8	0.30385	0.73317	1	0.959826	1
GO:0071549	cellular response to dexamethasone stimulus	2	8	0.30385	0.73317	1	0.959826	1
GO:0097421	liver regeneration	2	8	0.30385	0.73317	1	0.959826	1
GO:0097531	mast cell migration	2	8	0.30385	0.73317	1	0.959826	1
GO:1901186	positive regulation of ERBB signaling pathway	2	8	0.30385	0.73317	1	0.959826	1
GO:1901739	regulation of myoblast fusion	2	8	0.30385	0.73317	1	0.959826	1
GO:2000178	negative regulation of neural precursor cell proliferation	2	8	0.30385	0.73317	1	0.959826	1
GO:1903530	regulation of secretion by cell	17	108	0.30928	0.745809	1	1	1
GO:0051128	regulation of cellular component organization	54	369	0.31116	0.749876	1	1	1
GO:0034764	positive regulation of transmembrane transport	8	47	0.31504	0.758756	1	1	1
GO:0051090	regulation of DNA-binding transcription factor activity	15	95	0.32118	0.760015	1	0.959826	1
GO:0051701	biological process involved in interaction with host	6	34	0.32276	0.760015	1	0.959826	1
GO:2000514	regulation of CD4-positive, alpha-beta T cell activation	6	34	0.32276	0.760015	1	1	1
GO:2000377	regulation of reactive oxygen species metabolic process	10	61	0.32538	0.760015	1	0.959826	1
GO:0065003	protein-containing complex assembly	29	193	0.32551	0.760015	1	1	1
GO:0006401	RNA catabolic process	4	21	0.32585	0.760015	1	0.959826	1
GO:0010469	regulation of signaling receptor activity	4	21	0.32585	0.760015	1	1	1
GO:0031638	zymogen activation	4	21	0.32585	0.760015	1	0.959826	1
GO:0034109	homotypic cell-cell adhesion	4	21	0.32585	0.760015	1	0.959826	1
GO:0042269	regulation of natural killer cell mediated cytotoxicity	4	21	0.32585	0.760015	1	0.959826	1
GO:0045806	negative regulation of endocytosis	4	21	0.32585	0.760015	1	0.959826	1
GO:0052372	modulation by symbiont of entry into host	4	21	0.32585	0.760015	1	0.959826	1
GO:0048878	chemical homeostasis	23	151	0.32689	0.760015	1	1	1
GO:0007596	blood coagulation	7	41	0.33108	0.760015	1	0.959826	1
GO:0046634	regulation of alpha-beta T cell activation	8	48	0.33712	0.760015	1	1	1
GO:0045453	bone resorption	5	28	0.33991	0.760015	1	0.959826	1
GO:0046683	response to organophosphorus	5	28	0.33991	0.760015	1	0.959826	1
GO:0009306	protein secretion	9	55	0.34161	0.760015	1	0.959826	1
GO:0032956	regulation of actin cytoskeleton organization	9	55	0.34161	0.760015	1	0.959826	1
GO:0035592	establishment of protein localization to extracellular region	9	55	0.34161	0.760015	1	0.959826	1
GO:0071692	protein localization to extracellular region	9	55	0.34161	0.760015	1	0.959826	1
GO:0010543	regulation of platelet activation	3	15	0.34192	0.760015	1	0.959826	1
GO:0032147	activation of protein kinase activity	3	15	0.34192	0.760015	1	0.959826	1
GO:0048535	lymph node development	3	15	0.34192	0.760015	1	0.959826	1
GO:0051168	nuclear export	3	15	0.34192	0.760015	1	0.959826	1
GO:0097581	lamellipodium organization	3	15	0.34192	0.760015	1	0.959826	1
GO:0023056	positive regulation of signaling	55	380	0.34597	0.760015	1	1	1
GO:0051091	positive regulation of DNA-binding transcription factor activity	11	69	0.34758	0.760015	1	0.959826	1
GO:0006809	nitric oxide biosynthetic process	6	35	0.34894	0.760015	1	0.959826	1
GO:0007565	female pregnancy	6	35	0.34894	0.760015	1	0.959826	1
GO:0045428	regulation of nitric oxide biosynthetic process	6	35	0.34894	0.760015	1	0.959826	1
GO:0050714	positive regulation of protein secretion	6	35	0.34894	0.760015	1	0.959826	1
GO:0051641	cellular localization	53	366	0.3491	0.760015	1	1	1
GO:0030029	actin filament-based process	15	97	0.35291	0.760015	1	0.959826	1
GO:0032880	regulation of protein localization	22	146	0.35315	0.760015	1	0.959826	1
GO:0006811	monoatomic ion transport	20	132	0.35376	0.760015	1	1	1
GO:0006812	monoatomic cation transport	18	118	0.35391	0.760015	1	0.959826	1
GO:0007599	hemostasis	7	42	0.35509	0.760015	1	0.959826	1
GO:0010647	positive regulation of cell communication	55	381	0.35521	0.760015	1	1	1
GO:0002066	columnar/cuboidal epithelial cell development	2	9	0.35784	0.760015	1	0.959826	1
GO:0002693	positive regulation of cellular extravasation	2	9	0.35784	0.760015	1	0.959826	1
GO:0002716	negative regulation of natural killer cell mediated immunity	2	9	0.35784	0.760015	1	0.959826	1
GO:0006739	NADP metabolic process	2	9	0.35784	0.760015	1	1	1
GO:0006968	cellular defense response	2	9	0.35784	0.760015	1	0.959826	1
GO:0010591	regulation of lamellipodium assembly	2	9	0.35784	0.760015	1	0.959826	1
GO:0016601	Rac protein signal transduction	2	9	0.35784	0.760015	1	0.959826	1
GO:0030501	positive regulation of bone mineralization	2	9	0.35784	0.760015	1	0.959826	1
GO:0032725	positive regulation of granulocyte macrophage colony-stimulating factor production	2	9	0.35784	0.760015	1	0.959826	1
GO:0034121	regulation of toll-like receptor signaling pathway	2	9	0.35784	0.760015	1	0.959826	1
GO:0035176	social behavior	2	9	0.35784	0.760015	1	0.959826	1
GO:0035234	ectopic germ cell programmed cell death	2	9	0.35784	0.760015	1	0.959826	1
GO:0044319	wound healing, spreading of cells	2	9	0.35784	0.760015	1	0.959826	1
GO:0045625	regulation of T-helper 1 cell differentiation	2	9	0.35784	0.760015	1	0.959826	1
GO:0045649	regulation of macrophage differentiation	2	9	0.35784	0.760015	1	0.959826	1
GO:0045830	positive regulation of isotype switching	2	9	0.35784	0.760015	1	0.959826	1
GO:0045953	negative regulation of natural killer cell mediated cytotoxicity	2	9	0.35784	0.760015	1	0.959826	1
GO:0051703	biological process involved in intraspecies interaction between organisms	2	9	0.35784	0.760015	1	0.959826	1
GO:0071801	regulation of podosome assembly	2	9	0.35784	0.760015	1	0.959826	1
GO:0072540	T-helper 17 cell lineage commitment	2	9	0.35784	0.760015	1	0.959826	1
GO:0090280	positive regulation of calcium ion import	2	9	0.35784	0.760015	1	0.959826	1
GO:0090504	epiboly	2	9	0.35784	0.760015	1	0.959826	1
GO:0090505	epiboly involved in wound healing	2	9	0.35784	0.760015	1	0.959826	1
GO:0097062	dendritic spine maintenance	2	9	0.35784	0.760015	1	0.959826	1
GO:0099601	regulation of neurotransmitter receptor activity	2	9	0.35784	0.760015	1	1	1
GO:1902230	negative regulation of intrinsic apoptotic signaling pathway in response to DNA damage	2	9	0.35784	0.760015	1	0.959826	1
GO:2000273	positive regulation of signaling receptor activity	2	9	0.35784	0.760015	1	1	1
GO:2000353	positive regulation of endothelial cell apoptotic process	2	9	0.35784	0.760015	1	0.959826	1
GO:0001821	histamine secretion	1	3	0.35915	0.760015	1	0.959826	1
GO:0001834	trophectodermal cell proliferation	1	3	0.35915	0.760015	1	0.959826	1
GO:0002265	astrocyte activation involved in immune response	1	3	0.35915	0.760015	1	0.959826	1
GO:0002339	B cell selection	1	3	0.35915	0.760015	1	0.959826	1
GO:0002349	histamine production involved in inflammatory response	1	3	0.35915	0.760015	1	0.959826	1
GO:0002372	myeloid dendritic cell cytokine production	1	3	0.35915	0.760015	1	0.959826	1
GO:0002408	myeloid dendritic cell chemotaxis	1	3	0.35915	0.760015	1	0.959826	1
GO:0002420	natural killer cell mediated cytotoxicity directed against tumor cell target	1	3	0.35915	0.760015	1	0.959826	1
GO:0002423	natural killer cell mediated immune response to tumor cell	1	3	0.35915	0.760015	1	0.959826	1
GO:0002441	histamine secretion involved in inflammatory response	1	3	0.35915	0.760015	1	0.959826	1
GO:0002461	tolerance induction dependent upon immune response	1	3	0.35915	0.760015	1	0.959826	1
GO:0002553	histamine secretion by mast cell	1	3	0.35915	0.760015	1	0.959826	1
GO:0002605	negative regulation of dendritic cell antigen processing and presentation	1	3	0.35915	0.760015	1	0.959826	1
GO:0002733	regulation of myeloid dendritic cell cytokine production	1	3	0.35915	0.760015	1	0.959826	1
GO:0002735	positive regulation of myeloid dendritic cell cytokine production	1	3	0.35915	0.760015	1	0.959826	1
GO:0002767	immune response-inhibiting cell surface receptor signaling pathway	1	3	0.35915	0.760015	1	0.959826	1
GO:0002855	regulation of natural killer cell mediated immune response to tumor cell	1	3	0.35915	0.760015	1	0.959826	1
GO:0002858	regulation of natural killer cell mediated cytotoxicity directed against tumor cell target	1	3	0.35915	0.760015	1	0.959826	1
GO:0002865	negative regulation of acute inflammatory response to antigenic stimulus	1	3	0.35915	0.760015	1	0.959826	1
GO:0003337	mesenchymal to epithelial transition involved in metanephros morphogenesis	1	3	0.35915	0.760015	1	0.959826	1
GO:0003339	regulation of mesenchymal to epithelial transition involved in metanephros morphogenesis	1	3	0.35915	0.760015	1	0.959826	1
GO:0006029	proteoglycan metabolic process	1	3	0.35915	0.760015	1	0.959826	1
GO:0006929	substrate-dependent cell migration	1	3	0.35915	0.760015	1	0.959826	1
GO:0007096	regulation of exit from mitosis	1	3	0.35915	0.760015	1	0.959826	1
GO:0010447	response to acidic pH	1	3	0.35915	0.760015	1	0.959826	1
GO:0010458	exit from mitosis	1	3	0.35915	0.760015	1	0.959826	1
GO:0010517	regulation of phospholipase activity	1	3	0.35915	0.760015	1	0.959826	1
GO:0010737	protein kinase A signaling	1	3	0.35915	0.760015	1	0.959826	1
GO:0010885	regulation of cholesterol storage	1	3	0.35915	0.760015	1	0.959826	1
GO:0010888	negative regulation of lipid storage	1	3	0.35915	0.760015	1	0.959826	1
GO:0010919	regulation of inositol phosphate biosynthetic process	1	3	0.35915	0.760015	1	0.959826	1
GO:0010984	regulation of lipoprotein particle clearance	1	3	0.35915	0.760015	1	0.959826	1
GO:0010988	regulation of low-density lipoprotein particle clearance	1	3	0.35915	0.760015	1	0.959826	1
GO:0016322	neuron remodeling	1	3	0.35915	0.760015	1	0.959826	1
GO:0030002	intracellular monoatomic anion homeostasis	1	3	0.35915	0.760015	1	0.959826	1
GO:0030517	negative regulation of axon extension	1	3	0.35915	0.760015	1	0.959826	1
GO:0030644	intracellular chloride ion homeostasis	1	3	0.35915	0.760015	1	0.959826	1
GO:0031053	primary miRNA processing	1	3	0.35915	0.760015	1	0.959826	1
GO:0031268	pseudopodium organization	1	3	0.35915	0.760015	1	0.959826	1
GO:0031269	pseudopodium assembly	1	3	0.35915	0.760015	1	0.959826	1
GO:0031953	negative regulation of protein autophosphorylation	1	3	0.35915	0.760015	1	0.959826	1
GO:0032488	Cdc42 protein signal transduction	1	3	0.35915	0.760015	1	0.959826	1
GO:0032780	negative regulation of ATP-dependent activity	1	3	0.35915	0.760015	1	0.959826	1
GO:0033030	negative regulation of neutrophil apoptotic process	1	3	0.35915	0.760015	1	0.959826	1
GO:0033081	regulation of T cell differentiation in thymus	1	3	0.35915	0.760015	1	0.959826	1
GO:0033089	positive regulation of T cell differentiation in thymus	1	3	0.35915	0.760015	1	0.959826	1
GO:0034124	regulation of MyD88-dependent toll-like receptor signaling pathway	1	3	0.35915	0.760015	1	0.959826	1
GO:0034137	positive regulation of toll-like receptor 2 signaling pathway	1	3	0.35915	0.760015	1	0.959826	1
GO:0034144	negative regulation of toll-like receptor 4 signaling pathway	1	3	0.35915	0.760015	1	0.959826	1
GO:0034158	toll-like receptor 8 signaling pathway	1	3	0.35915	0.760015	1	0.959826	1
GO:0035855	megakaryocyte development	1	3	0.35915	0.760015	1	0.959826	1
GO:0035900	response to isolation stress	1	3	0.35915	0.760015	1	0.959826	1
GO:0036135	Schwann cell migration	1	3	0.35915	0.760015	1	0.959826	1
GO:0036337	Fas signaling pathway	1	3	0.35915	0.760015	1	0.959826	1
GO:0038111	interleukin-7-mediated signaling pathway	1	3	0.35915	0.760015	1	0.959826	1
GO:0038146	chemokine (C-X-C motif) ligand 12 signaling pathway	1	3	0.35915	0.760015	1	0.959826	1
GO:0038157	granulocyte-macrophage colony-stimulating factor signaling pathway	1	3	0.35915	0.760015	1	0.959826	1
GO:0038160	CXCL12-activated CXCR4 signaling pathway	1	3	0.35915	0.760015	1	0.959826	1
GO:0042053	regulation of dopamine metabolic process	1	3	0.35915	0.760015	1	0.959826	1
GO:0042069	regulation of catecholamine metabolic process	1	3	0.35915	0.760015	1	0.959826	1
GO:0042482	positive regulation of odontogenesis	1	3	0.35915	0.760015	1	0.959826	1
GO:0043131	erythrocyte enucleation	1	3	0.35915	0.760015	1	0.959826	1
GO:0043354	enucleate erythrocyte maturation	1	3	0.35915	0.760015	1	0.959826	1
GO:0043555	regulation of translation in response to stress	1	3	0.35915	0.760015	1	0.959826	1
GO:0044793	negative regulation by host of viral process	1	3	0.35915	0.760015	1	0.959826	1
GO:0044827	modulation by host of viral genome replication	1	3	0.35915	0.760015	1	0.959826	1
GO:0045065	cytotoxic T cell differentiation	1	3	0.35915	0.760015	1	0.959826	1
GO:0045583	regulation of cytotoxic T cell differentiation	1	3	0.35915	0.760015	1	0.959826	1
GO:0045647	negative regulation of erythrocyte differentiation	1	3	0.35915	0.760015	1	0.959826	1
GO:0045917	positive regulation of complement activation	1	3	0.35915	0.760015	1	0.959826	1
GO:0046010	positive regulation of circadian sleep/wake cycle, non-REM sleep	1	3	0.35915	0.760015	1	0.959826	1
GO:0046543	development of secondary female sexual characteristics	1	3	0.35915	0.760015	1	0.959826	1
GO:0046826	negative regulation of protein export from nucleus	1	3	0.35915	0.760015	1	0.959826	1
GO:0046839	phospholipid dephosphorylation	1	3	0.35915	0.760015	1	0.959826	1
GO:0048278	vesicle docking	1	3	0.35915	0.760015	1	0.959826	1
GO:0048296	regulation of isotype switching to IgA isotypes	1	3	0.35915	0.760015	1	0.959826	1
GO:0048298	positive regulation of isotype switching to IgA isotypes	1	3	0.35915	0.760015	1	0.959826	1
GO:0048680	positive regulation of axon regeneration	1	3	0.35915	0.760015	1	0.959826	1
GO:0048822	enucleate erythrocyte development	1	3	0.35915	0.760015	1	0.959826	1
GO:0048874	host-mediated regulation of intestinal microbiota composition	1	3	0.35915	0.760015	1	0.959826	1
GO:0050904	diapedesis	1	3	0.35915	0.760015	1	0.959826	1
GO:0051457	maintenance of protein location in nucleus	1	3	0.35915	0.760015	1	0.959826	1
GO:0051497	negative regulation of stress fiber assembly	1	3	0.35915	0.760015	1	0.959826	1
GO:0051541	elastin metabolic process	1	3	0.35915	0.760015	1	0.959826	1
GO:0051608	histamine transport	1	3	0.35915	0.760015	1	0.959826	1
GO:0051665	membrane raft localization	1	3	0.35915	0.760015	1	0.959826	1
GO:0055064	chloride ion homeostasis	1	3	0.35915	0.760015	1	0.959826	1
GO:0055081	monoatomic anion homeostasis	1	3	0.35915	0.760015	1	0.959826	1
GO:0060009	Sertoli cell development	1	3	0.35915	0.760015	1	0.959826	1
GO:0060075	regulation of resting membrane potential	1	3	0.35915	0.760015	1	0.959826	1
GO:0060193	positive regulation of lipase activity	1	3	0.35915	0.760015	1	0.959826	1
GO:0061298	retina vasculature development in camera-type eye	1	3	0.35915	0.760015	1	0.959826	1
GO:0061762	CAMKK-AMPK signaling cascade	1	3	0.35915	0.760015	1	0.959826	1
GO:0070307	lens fiber cell development	1	3	0.35915	0.760015	1	0.959826	1
GO:0070341	fat cell proliferation	1	3	0.35915	0.760015	1	0.959826	1
GO:0070572	positive regulation of neuron projection regeneration	1	3	0.35915	0.760015	1	0.959826	1
GO:0070947	neutrophil-mediated killing of fungus	1	3	0.35915	0.760015	1	0.959826	1
GO:0071392	cellular response to estradiol stimulus	1	3	0.35915	0.760015	1	0.959826	1
GO:0071492	cellular response to UV-A	1	3	0.35915	0.760015	1	0.959826	1
GO:0071593	lymphocyte aggregation	1	3	0.35915	0.760015	1	0.959826	1
GO:0071635	negative regulation of transforming growth factor beta production	1	3	0.35915	0.760015	1	0.959826	1
GO:0071640	regulation of macrophage inflammatory protein 1 alpha production	1	3	0.35915	0.760015	1	0.959826	1
GO:0072074	kidney mesenchyme development	1	3	0.35915	0.760015	1	0.959826	1
GO:0072075	metanephric mesenchyme development	1	3	0.35915	0.760015	1	0.959826	1
GO:0072202	cell differentiation involved in metanephros development	1	3	0.35915	0.760015	1	0.959826	1
GO:0072203	cell proliferation involved in metanephros development	1	3	0.35915	0.760015	1	0.959826	1
GO:0072234	metanephric nephron tubule development	1	3	0.35915	0.760015	1	0.959826	1
GO:0072243	metanephric nephron epithelium development	1	3	0.35915	0.760015	1	0.959826	1
GO:0072283	metanephric renal vesicle morphogenesis	1	3	0.35915	0.760015	1	0.959826	1
GO:0072679	thymocyte migration	1	3	0.35915	0.760015	1	0.959826	1
GO:0090271	positive regulation of fibroblast growth factor production	1	3	0.35915	0.760015	1	0.959826	1
GO:0090383	phagosome acidification	1	3	0.35915	0.760015	1	0.959826	1
GO:0090601	enucleation	1	3	0.35915	0.760015	1	0.959826	1
GO:0090673	endothelial cell-matrix adhesion	1	3	0.35915	0.760015	1	0.959826	1
GO:0150094	amyloid-beta clearance by cellular catabolic process	1	3	0.35915	0.760015	1	0.959826	1
GO:1900125	regulation of hyaluronan biosynthetic process	1	3	0.35915	0.760015	1	0.959826	1
GO:1900150	regulation of defense response to fungus	1	3	0.35915	0.760015	1	0.959826	1
GO:1900226	negative regulation of NLRP3 inflammasome complex assembly	1	3	0.35915	0.760015	1	0.959826	1
GO:1900426	positive regulation of defense response to bacterium	1	3	0.35915	0.760015	1	0.959826	1
GO:1901020	negative regulation of calcium ion transmembrane transporter activity	1	3	0.35915	0.760015	1	0.959826	1
GO:1901164	negative regulation of trophoblast cell migration	1	3	0.35915	0.760015	1	0.959826	1
GO:1901299	negative regulation of hydrogen peroxide-mediated programmed cell death	1	3	0.35915	0.760015	1	0.959826	1
GO:1901653	cellular response to peptide	1	3	0.35915	0.760015	1	0.959826	1
GO:1902033	regulation of hematopoietic stem cell proliferation	1	3	0.35915	0.760015	1	0.959826	1
GO:1902214	regulation of interleukin-4-mediated signaling pathway	1	3	0.35915	0.760015	1	0.959826	1
GO:1902563	regulation of neutrophil activation	1	3	0.35915	0.760015	1	0.959826	1
GO:1903019	negative regulation of glycoprotein metabolic process	1	3	0.35915	0.760015	1	0.959826	1
GO:1903265	positive regulation of tumor necrosis factor-mediated signaling pathway	1	3	0.35915	0.760015	1	0.959826	1
GO:1903979	negative regulation of microglial cell activation	1	3	0.35915	0.760015	1	0.959826	1
GO:1904092	regulation of autophagic cell death	1	3	0.35915	0.760015	1	0.959826	1
GO:1904178	negative regulation of adipose tissue development	1	3	0.35915	0.760015	1	0.959826	1
GO:1904238	pericyte cell differentiation	1	3	0.35915	0.760015	1	0.959826	1
GO:1905048	regulation of metallopeptidase activity	1	3	0.35915	0.760015	1	0.959826	1
GO:1905247	positive regulation of aspartic-type peptidase activity	1	3	0.35915	0.760015	1	0.959826	1
GO:1905289	regulation of CAMKK-AMPK signaling cascade	1	3	0.35915	0.760015	1	0.959826	1
GO:1905563	negative regulation of vascular endothelial cell proliferation	1	3	0.35915	0.760015	1	0.959826	1
GO:1905673	positive regulation of lysosome organization	1	3	0.35915	0.760015	1	0.959826	1
GO:1905867	epididymis development	1	3	0.35915	0.760015	1	0.959826	1
GO:2000288	positive regulation of myoblast proliferation	1	3	0.35915	0.760015	1	0.959826	1
GO:2000402	negative regulation of lymphocyte migration	1	3	0.35915	0.760015	1	0.959826	1
GO:2000407	regulation of T cell extravasation	1	3	0.35915	0.760015	1	0.959826	1
GO:2000437	regulation of monocyte extravasation	1	3	0.35915	0.760015	1	0.959826	1
GO:2000439	positive regulation of monocyte extravasation	1	3	0.35915	0.760015	1	0.959826	1
GO:2000449	regulation of CD8-positive, alpha-beta T cell extravasation	1	3	0.35915	0.760015	1	0.959826	1
GO:2000520	regulation of immunological synapse formation	1	3	0.35915	0.760015	1	0.959826	1
GO:2000644	regulation of receptor catabolic process	1	3	0.35915	0.760015	1	0.959826	1
GO:2000697	negative regulation of epithelial cell differentiation involved in kidney development	1	3	0.35915	0.760015	1	0.959826	1
GO:2001027	negative regulation of endothelial cell chemotaxis	1	3	0.35915	0.760015	1	0.959826	1
GO:2001190	positive regulation of T cell activation via T cell receptor contact with antigen bound to MHC molecule on antigen presenting cell	1	3	0.35915	0.760015	1	0.959826	1
GO:2001268	negative regulation of cysteine-type endopeptidase activity involved in apoptotic signaling pathway	1	3	0.35915	0.760015	1	0.959826	1
GO:0002369	T cell cytokine production	4	22	0.35937	0.760015	1	0.959826	1
GO:0002715	regulation of natural killer cell mediated immunity	4	22	0.35937	0.760015	1	0.959826	1
GO:0019233	sensory perception of pain	4	22	0.35937	0.760015	1	0.959826	1
GO:0032720	negative regulation of tumor necrosis factor production	4	22	0.35937	0.760015	1	0.959826	1
GO:0051403	stress-activated MAPK cascade	4	22	0.35937	0.760015	1	1	1
GO:1903036	positive regulation of response to wounding	4	22	0.35937	0.760015	1	0.959826	1
GO:0050708	regulation of protein secretion	8	49	0.35944	0.760015	1	0.959826	1
GO:0035710	CD4-positive, alpha-beta T cell activation	9	56	0.36256	0.766194	1	1	1
GO:0060341	regulation of cellular localization	23	154	0.3658	0.772621	1	0.975467	1
GO:0043123	positive regulation of canonical NF-kappaB signal transduction	12	77	0.36757	0.775937	1	0.977499	1
GO:0045429	positive regulation of nitric oxide biosynthetic process	5	29	0.3692	0.777263	1	0.97915	1
GO:0046637	regulation of alpha-beta T cell differentiation	5	29	0.3692	0.777263	1	1	1
GO:1902806	regulation of cell cycle G1/S phase transition	5	29	0.3692	0.777263	1	0.97915	1
GO:1904407	positive regulation of nitric oxide metabolic process	5	29	0.3692	0.777263	1	0.97915	1
GO:2001238	positive regulation of extrinsic apoptotic signaling pathway	5	29	0.3692	0.777263	1	0.97915	1
GO:0044703	multi-organism reproductive process	6	36	0.3753	0.787968	1	1	1
GO:0044706	multi-multicellular organism process	6	36	0.3753	0.787968	1	1	1
GO:0046209	nitric oxide metabolic process	6	36	0.3753	0.787968	1	0.991553	1
GO:0080164	regulation of nitric oxide metabolic process	6	36	0.3753	0.787968	1	0.991553	1
GO:2001057	reactive nitrogen species metabolic process	6	36	0.3753	0.787968	1	0.991553	1
GO:0022603	regulation of anatomical structure morphogenesis	25	169	0.3769	0.790899	1	1	1
GO:0043408	regulation of MAPK cascade	24	162	0.37797	0.792715	1	1	1
GO:0050817	coagulation	7	43	0.37927	0.795012	1	1	1
GO:0002724	regulation of T cell cytokine production	3	16	0.38215	0.798031	1	1	1
GO:0015844	monoamine transport	3	16	0.38215	0.798031	1	1	1
GO:0032689	negative regulation of type II interferon production	3	16	0.38215	0.798031	1	1	1
GO:0046488	phosphatidylinositol metabolic process	3	16	0.38215	0.798031	1	1	1
GO:0051453	regulation of intracellular pH	3	16	0.38215	0.798031	1	1	1
GO:0072028	nephron morphogenesis	3	16	0.38215	0.798031	1	1	1
GO:0072088	nephron epithelium morphogenesis	3	16	0.38215	0.798031	1	1	1
GO:0051235	maintenance of location	10	64	0.38478	0.803091	1	1	1
GO:0009889	regulation of biosynthetic process	87	616	0.39067	0.814946	1	1	1
GO:0008064	regulation of actin polymerization or depolymerization	4	23	0.39286	0.816442	1	1	1
GO:0030832	regulation of actin filament length	4	23	0.39286	0.816442	1	1	1
GO:0031330	negative regulation of cellular catabolic process	4	23	0.39286	0.816442	1	1	1
GO:0042092	type 2 immune response	4	23	0.39286	0.816442	1	1	1
GO:0043370	regulation of CD4-positive, alpha-beta T cell differentiation	4	23	0.39286	0.816442	1	1	1
GO:0141188	nucleic acid catabolic process	4	23	0.39286	0.816442	1	1	1
GO:1905477	positive regulation of protein localization to membrane	4	23	0.39286	0.816442	1	1	1
GO:0010468	regulation of gene expression	84	595	0.3974	0.825435	1	1	1
GO:0046849	bone remodeling	5	30	0.39852	0.827318	1	1	1
GO:0051048	negative regulation of secretion	6	37	0.40172	0.833515	1	1	1
GO:0008283	cell population proliferation	59	415	0.40416	0.835422	1	1	1
GO:0007259	cell surface receptor signaling pathway via JAK-STAT	9	58	0.40485	0.835422	1	1	1
GO:0001771	immunological synapse formation	2	10	0.41024	0.835422	1	1	1
GO:0006754	ATP biosynthetic process	2	10	0.41024	0.835422	1	1	1
GO:0007035	vacuolar acidification	2	10	0.41024	0.835422	1	1	1
GO:0009145	purine nucleoside triphosphate biosynthetic process	2	10	0.41024	0.835422	1	1	1
GO:0009201	ribonucleoside triphosphate biosynthetic process	2	10	0.41024	0.835422	1	1	1
GO:0009206	purine ribonucleoside triphosphate biosynthetic process	2	10	0.41024	0.835422	1	1	1
GO:0009988	cell-cell recognition	2	10	0.41024	0.835422	1	1	1
GO:0030224	monocyte differentiation	2	10	0.41024	0.835422	1	1	1
GO:0032570	response to progesterone	2	10	0.41024	0.835422	1	1	1
GO:0036037	CD8-positive, alpha-beta T cell activation	2	10	0.41024	0.835422	1	1	1
GO:0043032	positive regulation of macrophage activation	2	10	0.41024	0.835422	1	1	1
GO:0043114	regulation of vascular permeability	2	10	0.41024	0.835422	1	1	1
GO:0045191	regulation of isotype switching	2	10	0.41024	0.835422	1	1	1
GO:0045744	negative regulation of G protein-coupled receptor signaling pathway	2	10	0.41024	0.835422	1	1	1
GO:0045912	negative regulation of carbohydrate metabolic process	2	10	0.41024	0.835422	1	1	1
GO:0046825	regulation of protein export from nucleus	2	10	0.41024	0.835422	1	1	1
GO:0048710	regulation of astrocyte differentiation	2	10	0.41024	0.835422	1	1	1
GO:0051341	regulation of oxidoreductase activity	2	10	0.41024	0.835422	1	1	1
GO:0060443	mammary gland morphogenesis	2	10	0.41024	0.835422	1	1	1
GO:0070936	protein K48-linked ubiquitination	2	10	0.41024	0.835422	1	1	1
GO:0071359	cellular response to dsRNA	2	10	0.41024	0.835422	1	1	1
GO:0071800	podosome assembly	2	10	0.41024	0.835422	1	1	1
GO:0090183	regulation of kidney development	2	10	0.41024	0.835422	1	1	1
GO:1901532	regulation of hematopoietic progenitor cell differentiation	2	10	0.41024	0.835422	1	1	1
GO:1902253	regulation of intrinsic apoptotic signaling pathway by p53 class mediator	2	10	0.41024	0.835422	1	1	1
GO:2000648	positive regulation of stem cell proliferation	2	10	0.41024	0.835422	1	1	1
GO:1901701	cellular response to oxygen-containing compound	38	265	0.41477	0.835422	1	1	1
GO:0034220	monoatomic ion transmembrane transport	15	101	0.41796	0.835422	1	1	1
GO:0098655	monoatomic cation transmembrane transport	13	87	0.42089	0.835422	1	1	1
GO:0002828	regulation of type 2 immune response	3	17	0.42181	0.835422	1	1	1
GO:0006164	purine nucleotide biosynthetic process	3	17	0.42181	0.835422	1	1	1
GO:0006692	prostanoid metabolic process	3	17	0.42181	0.835422	1	1	1
GO:0006693	prostaglandin metabolic process	3	17	0.42181	0.835422	1	1	1
GO:0008277	regulation of G protein-coupled receptor signaling pathway	3	17	0.42181	0.835422	1	1	1
GO:0019364	pyridine nucleotide catabolic process	3	17	0.42181	0.835422	1	1	1
GO:0030330	DNA damage response, signal transduction by p53 class mediator	3	17	0.42181	0.835422	1	1	1
GO:0045911	positive regulation of DNA recombination	3	17	0.42181	0.835422	1	1	1
GO:0050765	negative regulation of phagocytosis	3	17	0.42181	0.835422	1	1	1
GO:0072526	pyridine-containing compound catabolic process	3	17	0.42181	0.835422	1	1	1
GO:0072538	T-helper 17 type immune response	3	17	0.42181	0.835422	1	1	1
GO:0070588	calcium ion transmembrane transport	9	59	0.42607	0.835422	1	1	1
GO:0008360	regulation of cell shape	4	24	0.42609	0.835422	1	1	1
GO:0014911	positive regulation of smooth muscle cell migration	4	24	0.42609	0.835422	1	1	1
GO:0030041	actin filament polymerization	4	24	0.42609	0.835422	1	1	1
GO:0031098	stress-activated protein kinase signaling cascade	4	24	0.42609	0.835422	1	1	1
GO:0032355	response to estradiol	4	24	0.42609	0.835422	1	1	1
GO:0048678	response to axon injury	4	24	0.42609	0.835422	1	1	1
GO:1901989	positive regulation of cell cycle phase transition	4	24	0.42609	0.835422	1	1	1
GO:0016525	negative regulation of angiogenesis	5	31	0.42772	0.835422	1	1	1
GO:0001659	temperature homeostasis	7	45	0.42778	0.835422	1	1	1
GO:0034655	nucleobase-containing compound catabolic process	7	45	0.42778	0.835422	1	1	1
GO:0051259	protein complex oligomerization	7	45	0.42778	0.835422	1	1	1
GO:0001894	tissue homeostasis	9	60	0.44726	0.835422	1	1	1
GO:0060249	anatomical structure homeostasis	9	60	0.44726	0.835422	1	1	1
GO:0001835	blastocyst hatching	1	4	0.44764	0.835422	1	1	1
GO:0002069	columnar/cuboidal epithelial cell maturation	1	4	0.44764	0.835422	1	1	1
GO:0002115	store-operated calcium entry	1	4	0.44764	0.835422	1	1	1
GO:0002317	plasma cell differentiation	1	4	0.44764	0.835422	1	1	1
GO:0002326	B cell lineage commitment	1	4	0.44764	0.835422	1	1	1
GO:0002357	defense response to tumor cell	1	4	0.44764	0.835422	1	1	1
GO:0002513	tolerance induction to self antigen	1	4	0.44764	0.835422	1	1	1
GO:0002674	negative regulation of acute inflammatory response	1	4	0.44764	0.835422	1	1	1
GO:0002676	regulation of chronic inflammatory response	1	4	0.44764	0.835422	1	1	1
GO:0002765	immune response-inhibiting signal transduction	1	4	0.44764	0.835422	1	1	1
GO:0003338	metanephros morphogenesis	1	4	0.44764	0.835422	1	1	1
GO:0006023	aminoglycan biosynthetic process	1	4	0.44764	0.835422	1	1	1
GO:0006024	glycosaminoglycan biosynthetic process	1	4	0.44764	0.835422	1	1	1
GO:0006883	intracellular sodium ion homeostasis	1	4	0.44764	0.835422	1	1	1
GO:0007406	negative regulation of neuroblast proliferation	1	4	0.44764	0.835422	1	1	1
GO:0010875	positive regulation of cholesterol efflux	1	4	0.44764	0.835422	1	1	1
GO:0010878	cholesterol storage	1	4	0.44764	0.835422	1	1	1
GO:0010922	positive regulation of phosphatase activity	1	4	0.44764	0.835422	1	1	1
GO:0014744	positive regulation of muscle adaptation	1	4	0.44764	0.835422	1	1	1
GO:0018149	peptide cross-linking	1	4	0.44764	0.835422	1	1	1
GO:0019076	viral release from host cell	1	4	0.44764	0.835422	1	1	1
GO:0021542	dentate gyrus development	1	4	0.44764	0.835422	1	1	1
GO:0030042	actin filament depolymerization	1	4	0.44764	0.835422	1	1	1
GO:0030213	hyaluronan biosynthetic process	1	4	0.44764	0.835422	1	1	1
GO:0030728	ovulation	1	4	0.44764	0.835422	1	1	1
GO:0030730	sequestering of triglyceride	1	4	0.44764	0.835422	1	1	1
GO:0030834	regulation of actin filament depolymerization	1	4	0.44764	0.835422	1	1	1
GO:0032289	central nervous system myelin formation	1	4	0.44764	0.835422	1	1	1
GO:0032373	positive regulation of sterol transport	1	4	0.44764	0.835422	1	1	1
GO:0032376	positive regulation of cholesterol transport	1	4	0.44764	0.835422	1	1	1
GO:0032456	endocytic recycling	1	4	0.44764	0.835422	1	1	1
GO:0032632	interleukin-3 production	1	4	0.44764	0.835422	1	1	1
GO:0032730	positive regulation of interleukin-1 alpha production	1	4	0.44764	0.835422	1	1	1
GO:0032765	positive regulation of mast cell cytokine production	1	4	0.44764	0.835422	1	1	1
GO:0032815	negative regulation of natural killer cell activation	1	4	0.44764	0.835422	1	1	1
GO:0032905	transforming growth factor beta1 production	1	4	0.44764	0.835422	1	1	1
GO:0032908	regulation of transforming growth factor beta1 production	1	4	0.44764	0.835422	1	1	1
GO:0033689	negative regulation of osteoblast proliferation	1	4	0.44764	0.835422	1	1	1
GO:0034067	protein localization to Golgi apparatus	1	4	0.44764	0.835422	1	1	1
GO:0034136	negative regulation of toll-like receptor 2 signaling pathway	1	4	0.44764	0.835422	1	1	1
GO:0034383	low-density lipoprotein particle clearance	1	4	0.44764	0.835422	1	1	1
GO:0034616	response to laminar fluid shear stress	1	4	0.44764	0.835422	1	1	1
GO:0035188	hatching	1	4	0.44764	0.835422	1	1	1
GO:0035306	positive regulation of dephosphorylation	1	4	0.44764	0.835422	1	1	1
GO:0035590	purinergic nucleotide receptor signaling pathway	1	4	0.44764	0.835422	1	1	1
GO:0035634	response to stilbenoid	1	4	0.44764	0.835422	1	1	1
GO:0035754	B cell chemotaxis	1	4	0.44764	0.835422	1	1	1
GO:0035891	exit from host cell	1	4	0.44764	0.835422	1	1	1
GO:0035988	chondrocyte proliferation	1	4	0.44764	0.835422	1	1	1
GO:0038124	toll-like receptor TLR6:TLR2 signaling pathway	1	4	0.44764	0.835422	1	1	1
GO:0038159	C-X-C chemokine receptor CXCR4 signaling pathway	1	4	0.44764	0.835422	1	1	1
GO:0042118	endothelial cell activation	1	4	0.44764	0.835422	1	1	1
GO:0042270	protection from natural killer cell mediated cytotoxicity	1	4	0.44764	0.835422	1	1	1
GO:0042748	circadian sleep/wake cycle, non-REM sleep	1	4	0.44764	0.835422	1	1	1
GO:0043031	negative regulation of macrophage activation	1	4	0.44764	0.835422	1	1	1
GO:0043249	erythrocyte maturation	1	4	0.44764	0.835422	1	1	1
GO:0043268	positive regulation of potassium ion transport	1	4	0.44764	0.835422	1	1	1
GO:0043320	natural killer cell degranulation	1	4	0.44764	0.835422	1	1	1
GO:0043353	enucleate erythrocyte differentiation	1	4	0.44764	0.835422	1	1	1
GO:0043652	engulfment of apoptotic cell	1	4	0.44764	0.835422	1	1	1
GO:0044794	positive regulation by host of viral process	1	4	0.44764	0.835422	1	1	1
GO:0045136	development of secondary sexual characteristics	1	4	0.44764	0.835422	1	1	1
GO:0045188	regulation of circadian sleep/wake cycle, non-REM sleep	1	4	0.44764	0.835422	1	1	1
GO:0045843	negative regulation of striated muscle tissue development	1	4	0.44764	0.835422	1	1	1
GO:0045938	positive regulation of circadian sleep/wake cycle, sleep	1	4	0.44764	0.835422	1	1	1
GO:0048290	isotype switching to IgA isotypes	1	4	0.44764	0.835422	1	1	1
GO:0048635	negative regulation of muscle organ development	1	4	0.44764	0.835422	1	1	1
GO:0050849	negative regulation of calcium-mediated signaling	1	4	0.44764	0.835422	1	1	1
GO:0050961	detection of temperature stimulus involved in sensory perception	1	4	0.44764	0.835422	1	1	1
GO:0050965	detection of temperature stimulus involved in sensory perception of pain	1	4	0.44764	0.835422	1	1	1
GO:0050999	regulation of nitric-oxide synthase activity	1	4	0.44764	0.835422	1	1	1
GO:0051156	glucose 6-phosphate metabolic process	1	4	0.44764	0.835422	1	1	1
[truncated: 1,882 more rows]

## Sheet: MG IFNAR KO TBI vs control
MG IFNAR KO TBI vs control
goId	goName	countDE	countAll	pv	pv_fdr	pv_bonferroni	pv_elim	pv_weight	neg log10 p-value
GO:0048245	eosinophil chemotaxis	8	12	6.9e-10	4.8208e-07	1.44624e-06	1.44624e-06	1.44624e-06	5.83976
GO:0061844	antimicrobial humoral immune response mediated by antimicrobial peptide	9	22	1.6e-08	5.58933e-06	3.3536e-05	1.6768e-05	1.6768e-05	4.77552
GO:0032640	tumor necrosis factor production	13	86	3.7e-06	0.000360512	0.0077552	0.673255	0.00258507	2.58753
GO:0070098	chemokine-mediated signaling pathway	8	32	8.5e-06	0.000636286	0.017816	0.030916	0.02096	1.67861
GO:0010818	T cell chemotaxis	4	7	5e-05	0.00249524	0.1048	0.516378	0.02096	1.67861
GO:0045087	innate immune response	20	243	7.5e-05	0.00325094	0.1572	0.516378	0.0538971
GO:0033004	negative regulation of mast cell activation	3	4	0.00018	0.00598857	0.37728	0.673527	0.0538971
GO:0032653	regulation of interleukin-10 production	6	26	0.00022	0.00688239	0.46112	0.691081	0.05764
GO:0050860	negative regulation of T cell receptor signaling pathway	3	5	0.00043	0.0109912	0.90128	0.128754	0.090128
GO:2000501	regulation of natural killer cell chemotaxis	3	5	0.00043	0.0109912	0.90128	1	0.090128
GO:0031343	positive regulation of cell killing	6	30	0.0005	0.0119091	1	0.730465	0.09432
GO:0002705	positive regulation of leukocyte mediated immunity	8	57	0.00068	0.0154922	1	0.691081	0.09432
GO:0002923	regulation of humoral immune response mediated by circulating immunoglobulin	3	6	0.00084	0.0175006	1	0.691081	0.117376
GO:0043615	astrocyte cell migration	3	6	0.00084	0.0175006	1	0.200284	0.117376
GO:0045670	regulation of osteoclast differentiation	5	22	0.00084	0.0175006	1	1	0.117376
GO:0050766	positive regulation of phagocytosis	6	35	0.0012	0.0224571	1	0.227067	0.1572
GO:1990266	neutrophil migration	7	41	0.00045	0.0112286	0.9432	0.779355	0.218916
GO:0006898	receptor-mediated endocytosis	7	51	0.00178	0.029847	1	0.255712	0.218916
GO:0050918	positive chemotaxis	4	16	0.00203	0.03248	1	0.26593	0.223941
GO:0002548	monocyte chemotaxis	6	20	4.3e-05	0.00224937	0.090128	0.255712	0.266491
GO:0048246	macrophage chemotaxis	6	20	4.3e-05	0.00224937	0.090128	0.255712	0.266491
GO:0032703	negative regulation of interleukin-2 production	3	9	0.00326	0.0464519	1	0.379609	0.310589
GO:0006954	inflammatory response	21	233	9.1e-06	0.00065771	0.0190736	0.08384	0.320269
GO:0032611	interleukin-1 beta production	6	43	0.00362	0.0500781	1	0.673527	0.320269
GO:0071727	cellular response to triacyl bacterial lipopeptide	2	3	0.00382	0.0500781	1	0.381272	0.320269
GO:0030335	positive regulation of cell migration	16	165	8.2e-05	0.00343744	0.171872	0.516378	0.332942
GO:0071216	cellular response to biotic stimulus	11	100	0.00052	0.0122463	1	0.683717	0.504392
GO:0043270	positive regulation of monoatomic ion transport	6	47	0.00572	0.06812	1	0.915393	0.504392
GO:0002270	plasmacytoid dendritic cell activation	2	4	0.00746	0.0781808	1	0.516378	0.504392
GO:0045590	negative regulation of regulatory T cell differentiation	2	4	0.00746	0.0781808	1	0.516378	0.504392
GO:0071726	cellular response to diacyl bacterial lipopeptide	2	4	0.00746	0.0781808	1	0.516378	0.504392
GO:0002371	dendritic cell cytokine production	4	14	0.00118	0.0222818	1	0.673527	0.604664
GO:0050730	regulation of peptidyl-tyrosine phosphorylation	7	62	0.00561	0.0671918	1	0.691081	0.604664
GO:0034113	heterotypic cell-cell adhesion	3	8	0.00223	0.0354097	1	0.274946	0.651856
GO:0001788	antibody-dependent cellular cytotoxicity	2	5	0.01214	0.106425	1	0.651856	0.651856
GO:0002238	response to molecule of fungal origin	2	5	0.01214	0.106425	1	0.691081	0.651856
GO:0043301	negative regulation of leukocyte degranulation	2	5	0.01214	0.106425	1	0.651856	0.651856
GO:0043313	regulation of neutrophil degranulation	2	5	0.01214	0.106425	1	0.651856	0.651856
GO:0043922	negative regulation by host of viral transcription	2	5	0.01214	0.106425	1	0.651856	0.651856
GO:0032715	negative regulation of interleukin-6 production	3	14	0.01244	0.106425	1	0.651856	0.651856
GO:0050672	negative regulation of lymphocyte proliferation	5	31	0.00425	0.0530238	1	0.673255	0.68619
GO:0045765	regulation of angiogenesis	7	73	0.01375	0.11528	1	0.673255	0.68619
GO:0006911	phagocytosis, engulfment	4	21	0.00584	0.0683835	1	0.516378	0.695491
GO:2000107	negative regulation of leukocyte apoptotic process	4	27	0.0146	0.120739	1	0.730465	0.695491
GO:0002223	stimulatory C-type lectin receptor signaling pathway	2	6	0.01779	0.129241	1	0.673255	0.731134
GO:0002638	negative regulation of immunoglobulin production	2	6	0.01779	0.129241	1	0.673255	0.731134
GO:0002887	negative regulation of myeloid leukocyte mediated immunity	2	6	0.01779	0.129241	1	0.673255	0.731134
GO:0032661	regulation of interleukin-18 production	2	6	0.01779	0.129241	1	0.673255	0.731134
GO:0042590	antigen processing and presentation of exogenous peptide antigen via MHC class I	2	6	0.01779	0.129241	1	0.673255	0.731134
GO:0045059	positive thymic T cell selection	2	6	0.01779	0.129241	1	0.673255	0.731134
GO:0045060	negative thymic T cell selection	2	6	0.01779	0.129241	1	0.673255	0.731134
GO:0032930	positive regulation of superoxide anion generation	3	16	0.01818	0.129241	1	0.673255	0.732794
GO:0002434	immune complex clearance	2	4	0.00746	0.0781808	1	0.516378	0.8233
GO:0033029	regulation of neutrophil apoptotic process	2	7	0.02433	0.151773	1	0.673255	0.8233
GO:0033630	positive regulation of cell adhesion mediated by integrin	2	7	0.02433	0.151773	1	0.673255	0.8233
GO:0044344	cellular response to fibroblast growth factor stimulus	2	7	0.02433	0.151773	1	0.673255	0.8233
GO:0070372	regulation of ERK1 and ERK2 cascade	6	64	0.02511	0.155289	1	0.673255	0.8233
GO:0050850	positive regulation of calcium-mediated signaling	3	18	0.02519	0.155289	1	0.673255	0.8233
GO:0032677	regulation of interleukin-8 production	4	32	0.02621	0.159235	1	0.673255	0.8233
GO:0001960	negative regulation of cytokine-mediated signaling pathway	3	19	0.02916	0.171203	1	0.691081	0.8233
GO:0031664	regulation of lipopolysaccharide-mediated signaling pathway	2	8	0.0317	0.181009	1	0.673255	0.8233
GO:0071639	positive regulation of monocyte chemotactic protein-1 production	2	8	0.0317	0.181009	1	0.673255	0.8233
GO:0043409	negative regulation of MAPK cascade	4	34	0.03206	0.181009	1	0.673255	0.8233
GO:0001811	negative regulation of type I hypersensitivity	1	1	0.03653	0.181009	1	0.673255	0.8233
GO:0001879	detection of yeast	1	1	0.03653	0.181009	1	0.673255	0.8233
GO:0002222	stimulatory killer cell immunoglobulin-like receptor signaling pathway	1	1	0.03653	0.181009	1	0.673255	0.8233
GO:0002410	plasmacytoid dendritic cell chemotaxis	1	1	0.03653	0.181009	1	0.673255	0.8233
GO:0002462	tolerance induction to nonself antigen	1	1	0.03653	0.181009	1	0.673255	0.8233
GO:0006933	negative regulation of cell adhesion involved in substrate-bound cell migration	1	1	0.03653	0.181009	1	0.673255	0.8233
GO:0031584	activation of phospholipase D activity	1	1	0.03653	0.181009	1	0.673255	0.8233
GO:0032685	negative regulation of granulocyte macrophage colony-stimulating factor production	1	1	0.03653	0.181009	1	0.673255	0.8233
GO:0033552	response to vitamin B3	1	1	0.03653	0.181009	1	0.673255	0.8233
GO:0034123	positive regulation of toll-like receptor signaling pathway	1	1	0.03653	0.181009	1	0.673255	0.8233
GO:0035393	chemokine (C-X-C motif) ligand 9 production	1	1	0.03653	0.181009	1	0.673255	0.8233
GO:0035688	T-helper 1 cell diapedesis	1	1	0.03653	0.181009	1	0.673255	0.8233
GO:0044828	negative regulation by host of viral genome replication	1	1	0.03653	0.181009	1	0.673255	0.8233
GO:0045347	negative regulation of MHC class II biosynthetic process	1	1	0.03653	0.181009	1	0.673255	0.8233
GO:0045584	negative regulation of cytotoxic T cell differentiation	1	1	0.03653	0.181009	1	0.673255	0.8233
GO:0060137	maternal process involved in parturition	1	1	0.03653	0.181009	1	0.673255	0.8233
GO:0060267	positive regulation of respiratory burst	1	1	0.03653	0.181009	1	0.673255	0.8233
GO:0071403	cellular response to high density lipoprotein particle stimulus	1	1	0.03653	0.181009	1	0.673255	0.8233
GO:0098508	endothelial to hematopoietic transition	1	1	0.03653	0.181009	1	0.673255	0.8233
GO:0120186	negative regulation of protein localization to chromatin	1	1	0.03653	0.181009	1	0.673255	0.8233
GO:0150102	negative regulation of monocyte activation	1	1	0.03653	0.181009	1	0.673255	0.8233
GO:1900625	positive regulation of monocyte aggregation	1	1	0.03653	0.181009	1	0.673255	0.8233
GO:1901253	negative regulation of intracellular transport of viral material	1	1	0.03653	0.181009	1	0.673255	0.8233
GO:1902685	positive regulation of receptor localization to synapse	1	1	0.03653	0.181009	1	0.673255	0.8233
GO:1903769	negative regulation of cell proliferation in bone marrow	1	1	0.03653	0.181009	1	0.673255	0.8233
GO:1903984	positive regulation of TRAIL-activated apoptotic signaling pathway	1	1	0.03653	0.181009	1	0.673255	0.8233
GO:1904905	negative regulation of endothelial cell-matrix adhesion via fibronectin	1	1	0.03653	0.181009	1	0.673255	0.8233
GO:1905237	response to cyclosporin A	1	1	0.03653	0.181009	1	0.673255	0.8233
GO:2000524	negative regulation of T cell costimulation	1	1	0.03653	0.181009	1	0.673255	0.8233
GO:2000529	positive regulation of myeloid dendritic cell chemotaxis	1	1	0.03653	0.181009	1	0.673255	0.8233
GO:0045806	negative regulation of endocytosis	3	21	0.03805	0.185519	1	0.673255	0.848434
GO:0032967	positive regulation of collagen biosynthetic process	2	9	0.03983	0.185519	1	0.673255	0.869622
GO:0044319	wound healing, spreading of cells	2	9	0.03983	0.185519	1	0.673255	0.869622
GO:0098586	cellular response to virus	3	22	0.04296	0.197033	1	0.673527	0.92829
GO:0000768	syncytium formation by plasma membrane fusion	4	19	0.00399	0.0500781	1	0.779355	0.96138
GO:0006955	immune response	35	435	2.6e-10	4.8208e-07	5.4496e-07	0.673527	1
GO:0072677	eosinophil migration	8	12	6.9e-10	4.8208e-07	1.44624e-06	1	1
GO:0006952	defense response	33	411	3.8e-09	1.9912e-06	7.9648e-06	0.678568	1
GO:0006959	humoral immune response	13	52	6.2e-09	2.59904e-06	1.29952e-05	0.741439	1
GO:0043207	response to external biotic stimulus	30	361	3.5e-08	9.17e-06	7.336e-05	1	1
GO:0051707	response to other organism	30	361	3.5e-08	9.17e-06	7.336e-05	0.673255	1
GO:0019730	antimicrobial humoral response	9	24	4e-08	9.31556e-06	8.384e-05	1	1
GO:0140546	defense response to symbiont	26	275	6.5e-08	1.22535e-05	0.00013624	0.812074	1
GO:0009607	response to biotic stimulus	30	370	6.8e-08	1.22535e-05	0.000142528	1	1
GO:0098542	defense response to other organism	27	299	7.6e-08	1.22535e-05	0.000159296	0.730465	1
GO:0009605	response to external stimulus	34	485	7.6e-08	1.22535e-05	0.000159296	0.846128	1
GO:0002376	immune system process	36	559	1.2e-07	1.79657e-05	0.00025152	0.8225	1
GO:0044419	biological process involved in interspecies interaction between organisms	30	383	1.7e-07	2.37547e-05	0.00035632	1	1
GO:0030595	leukocyte chemotaxis	14	81	2.4e-07	3.144e-05	0.00050304	1	1
GO:0097530	granulocyte migration	12	60	4.1e-07	5.05506e-05	0.00085936	0.846128	1
GO:0071621	granulocyte chemotaxis	11	51	6.2e-07	7.21956e-05	0.00129952	1	1
GO:0002703	regulation of leukocyte mediated immunity	14	96	2.2e-06	0.000242695	0.0046112	0.691081	1
GO:0060326	cell chemotaxis	14	100	3.6e-06	0.000360512	0.0075456	1	1
GO:0006935	chemotaxis	15	116	4.1e-06	0.000360512	0.0085936	1	1
GO:0042330	taxis	15	116	4.1e-06	0.000360512	0.0085936	1	1
GO:0071706	tumor necrosis factor superfamily cytokine production	13	87	4.3e-06	0.000360512	0.0090128	1	1
GO:0097529	myeloid leukocyte migration	13	87	4.3e-06	0.000360512	0.0090128	0.930486	1
GO:0016192	vesicle-mediated transport	20	208	6.2e-06	0.00049683	0.0129952	0.691081	1
GO:0050900	leukocyte migration	15	120	6.4e-06	0.00049683	0.0134144	1	1
GO:1990868	response to chemokine	8	33	1.1e-05	0.000743742	0.023056	1	1
GO:1990869	cellular response to chemokine	8	33	1.1e-05	0.000743742	0.023056	1	1
GO:0002443	leukocyte mediated immunity	16	143	1.2e-05	0.000786	0.025152	0.844364	1
GO:0048247	lymphocyte chemotaxis	6	17	1.5e-05	0.000952727	0.03144	0.762759	1
GO:0032680	regulation of tumor necrosis factor production	12	83	1.6e-05	0.000986353	0.033536	0.691081	1
GO:0002683	negative regulation of immune system process	15	130	1.8e-05	0.001048	0.037728	0.885411	1
GO:1903555	regulation of tumor necrosis factor superfamily cytokine production	12	84	1.8e-05	0.001048	0.037728	0.691081	1
GO:0001906	cell killing	11	74	3e-05	0.00169946	0.06288	0.673527	1
GO:0002275	myeloid cell activation involved in immune response	8	38	3.4e-05	0.00187537	0.071264	0.673255	1
GO:0002704	negative regulation of leukocyte mediated immunity	7	29	4.4e-05	0.00224937	0.092224	0.691081	1
GO:0002252	immune effector process	19	217	5.3e-05	0.00258344	0.111088	1	1
GO:0032760	positive regulation of tumor necrosis factor production	10	65	5.6e-05	0.00260836	0.117376	0.030916	1
GO:1903557	positive regulation of tumor necrosis factor superfamily cytokine production	10	65	5.6e-05	0.00260836	0.117376	1	1
GO:0006897	endocytosis	15	143	5.9e-05	0.00268835	0.123664	0.889693	1
GO:0002697	regulation of immune effector process	15	146	7.6e-05	0.00325094	0.159296	0.87361	1
GO:0016477	cell migration	22	287	7.6e-05	0.00325094	0.159296	1	1
GO:0040011	locomotion	21	268	9.3e-05	0.00382212	0.194928	0.846128	1
GO:0048870	cell motility	22	292	0.0001	0.00395472	0.2096	1	1
GO:2000147	positive regulation of cell motility	16	168	0.0001	0.00395472	0.2096	1	1
GO:0002684	positive regulation of immune system process	23	317	0.00011	0.00426963	0.23056	0.908504	1
GO:0040017	positive regulation of locomotion	16	170	0.00012	0.00457309	0.25152	1	1
GO:0071674	mononuclear cell migration	10	72	0.00014	0.00524	0.29344	1	1
GO:0002682	regulation of immune system process	26	397	0.00016	0.0057471	0.33536	1	1
GO:0060627	regulation of vesicle-mediated transport	13	120	0.00016	0.0057471	0.33536	0.985605	1
GO:1901623	regulation of lymphocyte chemotaxis	4	9	0.00017	0.0057471	0.35632	1	1
GO:0006950	response to stress	35	666	0.00017	0.0057471	0.35632	0.985605	1
GO:0002698	negative regulation of immune effector process	8	47	0.00017	0.0057471	0.35632	0.826089	1
GO:0002687	positive regulation of leukocyte migration	9	60	0.00017	0.0057471	0.35632	0.673527	1
GO:0030334	regulation of cell migration	18	217	0.0002	0.00655	0.4192	0.908504	1
GO:0007166	cell surface receptor signaling pathway	29	484	0.00021	0.00677169	0.44016	0.846128	1
GO:0034097	response to cytokine	21	283	0.00022	0.00688239	0.46112	0.673527	1
GO:0072678	T cell migration	5	17	0.00023	0.00708941	0.48208	0.691081	1
GO:2000145	regulation of cell motility	18	221	0.00026	0.00775233	0.54496	0.911559	1
GO:0098657	import into cell	15	162	0.00026	0.00775233	0.54496	0.985605	1
GO:0032613	interleukin-10 production	6	27	0.00027	0.00775233	0.56592	0.691081	1
GO:1901652	response to peptide	21	287	0.00027	0.00775233	0.56592	0.678568	1
GO:0032693	negative regulation of interleukin-10 production	4	10	0.00027	0.00775233	0.56592	0.09432	1
GO:0001909	leukocyte mediated cytotoxicity	8	51	0.00031	0.00878054	0.64976	0.967817	1
GO:1905517	macrophage migration	6	28	0.00034	0.00950187	0.71264	1	1
GO:0040012	regulation of locomotion	18	227	0.00037	0.0102042	0.77552	0.950167	1
GO:0071675	regulation of mononuclear cell migration	8	53	0.00041	0.0109912	0.85936	0.968198	1
GO:0035747	natural killer cell chemotaxis	3	5	0.00043	0.0109912	0.90128	1	1
GO:0002366	leukocyte activation involved in immune response	11	98	0.00043	0.0109912	0.90128	0.911559	1
GO:0002768	immune response-regulating cell surface receptor signaling pathway	11	98	0.00043	0.0109912	0.90128	0.779355	1
GO:0002444	myeloid leukocyte mediated immunity	7	41	0.00045	0.0112286	0.9432	1	1
GO:0002695	negative regulation of leukocyte activation	8	54	0.00047	0.0115896	0.98512	0.691081	1
GO:0002263	cell activation involved in immune response	11	99	0.00048	0.0116986	1	0.914853	1
GO:0072676	lymphocyte migration	6	30	0.0005	0.0119091	1	0.90114	1
GO:0071677	positive regulation of mononuclear cell migration	7	42	0.00053	0.0123431	1	0.871694	1
GO:0002699	positive regulation of immune effector process	11	101	0.00057	0.0131288	1	0.753245	1
GO:0030100	regulation of endocytosis	10	87	0.0007	0.0156085	1	0.846128	1
GO:0071219	cellular response to molecule of bacterial origin	10	87	0.0007	0.0156085	1	0.673527	1
GO:0002688	regulation of leukocyte chemotaxis	7	44	0.00071	0.0156648	1	1	1
GO:0050858	negative regulation of antigen receptor-mediated signaling pathway	3	6	0.00084	0.0175006	1	1	1
GO:0036230	granulocyte activation	5	22	0.00084	0.0175006	1	0.673255	1
GO:0045672	positive regulation of osteoclast differentiation	4	13	0.00086	0.0175006	1	0.516378	1
GO:0050856	regulation of T cell receptor signaling pathway	4	13	0.00086	0.0175006	1	0.805396	1
GO:0030593	neutrophil chemotaxis	6	33	0.00086	0.0175006	1	0.200284	1
GO:0050866	negative regulation of cell activation	8	59	0.00087	0.0175338	1	0.753245	1
GO:0002429	immune response-activating cell surface receptor signaling pathway	10	91	0.001	0.0199619	1	0.914853	1
GO:0070664	negative regulation of leukocyte proliferation	6	34	0.00102	0.0201691	1	0.691081	1
GO:0050778	positive regulation of immune response	17	224	0.00104	0.0203723	1	0.691081	1
GO:0002685	regulation of leukocyte migration	9	76	0.00109	0.0211541	1	0.911559	1
GO:0009617	response to bacterium	15	184	0.00112	0.0215369	1	0.681568	1
GO:0002888	positive regulation of myeloid leukocyte mediated immunity	4	14	0.00118	0.0222818	1	0.673527	1
GO:0002373	plasmacytoid dendritic cell cytokine production	2	2	0.0013	0.0232889	1	0.673255	1
GO:0002924	negative regulation of humoral immune response mediated by circulating immunoglobulin	2	2	0.0013	0.0232889	1	0.227067	1
GO:0033006	regulation of mast cell activation involved in immune response	2	2	0.0013	0.0232889	1	1	1
GO:0033007	negative regulation of mast cell activation involved in immune response	2	2	0.0013	0.0232889	1	0.227067	1
GO:0002274	myeloid leukocyte activation	10	94	0.0013	0.0232889	1	1	1
GO:0051250	negative regulation of lymphocyte activation	7	49	0.0014	0.0248678	1	0.906812	1
GO:0032101	regulation of response to external stimulus	19	274	0.00142	0.0249773	1	1	1
GO:0033003	regulation of mast cell activation	3	7	0.00143	0.0249773	1	0.730465	1
GO:0006909	phagocytosis	9	79	0.00146	0.0252906	1	0.846128	1
GO:0007162	negative regulation of cell adhesion	8	64	0.00151	0.0259423	1	0.989282	1
GO:0050854	regulation of antigen receptor-mediated signaling pathway	4	15	0.00156	0.026369	1	0.842104	1
GO:0001912	positive regulation of leukocyte mediated cytotoxicity	5	25	0.00156	0.026369	1	0.673255	1
GO:0002690	positive regulation of leukocyte chemotaxis	6	38	0.00188	0.0312737	1	1	1
GO:0001818	negative regulation of cytokine production	9	82	0.00191	0.0315225	1	1	1
GO:0050764	regulation of phagocytosis	7	52	0.00201	0.03248	1	0.911559	1
GO:0019221	cytokine-mediated signaling pathway	14	174	0.00202	0.03248	1	0.908504	1
GO:0008347	glial cell migration	4	16	0.00203	0.03248	1	0.842104	1
GO:0002886	regulation of myeloid leukocyte mediated immunity	5	27	0.00225	0.0354586	1	0.918224	1
GO:0007186	G protein-coupled receptor signaling pathway	10	101	0.0023	0.0359761	1	1	1
GO:0001817	regulation of cytokine production	17	240	0.00237	0.0367964	1	1	1
GO:0050776	regulation of immune response	18	263	0.00245	0.0377588	1	0.90114	1
GO:0006874	intracellular calcium ion homeostasis	7	54	0.00251	0.0384012	1	0.673527	1
GO:0045807	positive regulation of endocytosis	7	55	0.0028	0.0425232	1	0.950167	1
GO:0001816	cytokine production	18	266	0.00282	0.0425232	1	1	1
GO:1902105	regulation of leukocyte differentiation	10	104	0.00288	0.0431177	1	1	1
GO:0071345	cellular response to cytokine stimulus	17	245	0.003	0.0445957	1	0.908504	1
GO:0050777	negative regulation of immune response	7	56	0.00312	0.0457309	1	0.691081	1
GO:0055074	calcium ion homeostasis	7	56	0.00312	0.0457309	1	1	1
GO:0031341	regulation of cell killing	6	42	0.0032	0.0464519	1	0.914853	1
GO:0051049	regulation of transport	18	269	0.00322	0.0464519	1	1	1
GO:0002283	neutrophil activation involved in immune response	3	9	0.00326	0.0464519	1	0.691081	1
GO:0032879	regulation of localization	20	316	0.00328	0.0464519	1	1	1
GO:0051050	positive regulation of transport	14	183	0.00334	0.0469842	1	1	1
GO:0034341	response to type II interferon	6	43	0.00362	0.0500781	1	0.673527	1
GO:0051928	positive regulation of calcium ion transport	5	30	0.00366	0.0500781	1	0.673255	1
GO:0002713	negative regulation of B cell mediated immunity	2	3	0.00382	0.0500781	1	1	1
GO:0002890	negative regulation of immunoglobulin mediated immune response	2	3	0.00382	0.0500781	1	1	1
GO:0010819	regulation of T cell chemotaxis	2	3	0.00382	0.0500781	1	0.381272	1
GO:0035684	helper T cell extravasation	2	3	0.00382	0.0500781	1	0.673527	1
GO:0071725	response to triacyl bacterial lipopeptide	2	3	0.00382	0.0500781	1	1	1
GO:1904151	positive regulation of microglial cell mediated cytotoxicity	2	3	0.00382	0.0500781	1	0.381272	1
GO:0050920	regulation of chemotaxis	7	58	0.00383	0.0500781	1	1	1
GO:0002712	regulation of B cell mediated immunity	4	19	0.00399	0.0500781	1	0.691081	1
GO:0002820	negative regulation of adaptive immune response	4	19	0.00399	0.0500781	1	0.691081	1
GO:0002823	negative regulation of adaptive immune response based on somatic recombination of immune receptors built from immunoglobulin superfamily domains	4	19	0.00399	0.0500781	1	0.691081	1
GO:0002889	regulation of immunoglobulin mediated immune response	4	19	0.00399	0.0500781	1	0.691081	1
GO:0006949	syncytium formation	4	19	0.00399	0.0500781	1	0.779355	1
GO:0140253	cell-cell fusion	4	19	0.00399	0.0500781	1	0.779355	1
GO:0042110	T cell activation	14	188	0.00434	0.0538263	1	0.779355	1
GO:0051924	regulation of calcium ion transport	7	60	0.00465	0.0573318	1	0.812074	1
GO:0042119	neutrophil activation	4	20	0.00485	0.059448	1	0.691081	1
GO:0032945	negative regulation of mononuclear cell proliferation	5	32	0.0049	0.0597116	1	1	1
GO:0006816	calcium ion transport	8	77	0.00505	0.0611838	1	1	1
GO:0006810	transport	24	428	0.00519	0.0625186	1	1	1
GO:0002707	negative regulation of lymphocyte mediated immunity	4	21	0.00584	0.0683835	1	0.691829	1
GO:2000401	regulation of lymphocyte migration	4	21	0.00584	0.0683835	1	1	1
GO:0002920	regulation of humoral immune response	3	11	0.00608	0.0707982	1	0.826089	1
GO:0032612	interleukin-1 production	6	48	0.00636	0.0732448	1	1	1
GO:0050921	positive regulation of chemotaxis	6	48	0.00636	0.0732448	1	1	1
GO:0030316	osteoclast differentiation	5	34	0.00642	0.0735318	1	1	1
GO:0032103	positive regulation of response to external stimulus	14	197	0.00676	0.0770052	1	1	1
GO:0071222	cellular response to lipopolysaccharide	8	81	0.00693	0.0774851	1	0.673255	1
GO:0008037	cell recognition	4	22	0.00695	0.0774851	1	1	1
GO:0010324	membrane invagination	4	22	0.00695	0.0774851	1	1	1
GO:0099024	plasma membrane invagination	4	22	0.00695	0.0774851	1	1	1
GO:0002694	regulation of leukocyte activation	13	177	0.00712	0.0781808	1	0.968463	1
GO:0070661	leukocyte proliferation	11	137	0.00727	0.0781808	1	0.836932	1
GO:0001910	regulation of leukocyte mediated cytotoxicity	5	35	0.00729	0.0781808	1	1	1
GO:0002921	negative regulation of humoral immune response	2	4	0.00746	0.0781808	1	1	1
GO:0071724	response to diacyl bacterial lipopeptide	2	4	0.00746	0.0781808	1	1	1
GO:0090634	microglial cell mediated cytotoxicity	2	4	0.00746	0.0781808	1	1	1
GO:1904149	regulation of microglial cell mediated cytotoxicity	2	4	0.00746	0.0781808	1	1	1
GO:2000503	positive regulation of natural killer cell chemotaxis	2	4	0.00746	0.0781808	1	0.516378	1
GO:0045321	leukocyte activation	18	290	0.00776	0.0800935	1	1	1
GO:0032602	chemokine production	6	50	0.0078	0.0800935	1	0.730465	1
GO:0046651	lymphocyte proliferation	10	119	0.00783	0.0800935	1	0.90114	1
GO:1903706	regulation of hemopoiesis	10	119	0.00783	0.0800935	1	1	1
GO:0010759	positive regulation of macrophage chemotaxis	3	12	0.00791	0.0800935	1	0.516378	1
GO:0050869	negative regulation of B cell activation	3	12	0.00791	0.0800935	1	0.691081	1
GO:0090026	positive regulation of monocyte chemotaxis	3	12	0.00791	0.0800935	1	0.516378	1
GO:0001775	cell activation	19	316	0.00845	0.0847215	1	1	1
GO:0046649	lymphocyte activation	16	246	0.00845	0.0847215	1	0.911559	1
GO:0051249	regulation of lymphocyte activation	12	160	0.00854	0.0847215	1	1	1
GO:0051241	negative regulation of multicellular organismal process	15	224	0.00858	0.0847215	1	1	1
GO:0050864	regulation of B cell activation	6	51	0.0086	0.0847215	1	1	1
GO:0001819	positive regulation of cytokine production	13	181	0.00865	0.0847215	1	1	1
GO:0002521	leukocyte differentiation	13	181	0.00865	0.0847215	1	1	1
GO:0043269	regulation of monoatomic ion transport	8	85	0.00929	0.0901474	1	0.826089	1
GO:0051234	establishment of localization	24	445	0.00929	0.0901474	1	1	1
GO:0032663	regulation of interleukin-2 production	4	24	0.00957	0.0915923	1	0.908504	1
GO:0043299	leukocyte degranulation	4	24	0.00957	0.0915923	1	0.911559	1
GO:1902106	negative regulation of leukocyte differentiation	4	24	0.00957	0.0915923	1	1	1
GO:0032943	mononuclear cell proliferation	10	123	0.00991	0.094179	1	0.911559	1
GO:0048584	positive regulation of response to stimulus	25	474	0.01001	0.094179	1	1	1
GO:0002730	regulation of dendritic cell cytokine production	3	13	0.01002	0.094179	1	0.673527	1
GO:0050732	negative regulation of peptidyl-tyrosine phosphorylation	3	13	0.01002	0.094179	1	0.617704	1
GO:0006887	exocytosis	6	53	0.01038	0.0963604	1	0.753245	1
GO:0002220	innate immune response activating cell surface receptor signaling pathway	5	38	0.01039	0.0963604	1	1	1
GO:0002761	regulation of myeloid leukocyte differentiation	5	38	0.01039	0.0963604	1	1	1
GO:0010959	regulation of metal ion transport	7	70	0.01099	0.101476	1	0.90114	1
GO:0046633	alpha-beta T cell proliferation	4	25	0.01109	0.101505	1	0.691081	1
GO:1903707	negative regulation of hemopoiesis	4	25	0.01109	0.101505	1	1	1
GO:0022408	negative regulation of cell-cell adhesion	6	54	0.01136	0.103524	1	0.946307	1
GO:0050865	regulation of cell activation	13	187	0.01144	0.103802	1	1	1
GO:0050868	negative regulation of T cell activation	5	39	0.0116	0.1048	1	0.869611	1
GO:0034238	macrophage fusion	2	5	0.01214	0.106425	1	0.651856	1
GO:0072683	T cell extravasation	2	5	0.01214	0.106425	1	0.691081	1
GO:0042098	T cell proliferation	8	89	0.01222	0.106425	1	0.691081	1
GO:0045581	negative regulation of T cell differentiation	3	14	0.01244	0.106425	1	1	1
GO:0045620	negative regulation of lymphocyte differentiation	3	14	0.01244	0.106425	1	1	1
GO:0061515	myeloid cell development	3	14	0.01244	0.106425	1	0.687215	1
GO:0090025	regulation of monocyte chemotaxis	3	14	0.01244	0.106425	1	1	1
GO:0002763	positive regulation of myeloid leukocyte differentiation	4	26	0.01277	0.108805	1	1	1
GO:2000026	regulation of multicellular organismal development	17	280	0.01298	0.110146	1	1	1
GO:0070663	regulation of leukocyte proliferation	9	109	0.01336	0.112914	1	1	1
GO:0045637	regulation of myeloid cell differentiation	6	56	0.01353	0.113891	1	1	1
GO:0032651	regulation of interleukin-1 beta production	5	41	0.01431	0.119497	1	0.805396	1
GO:0002237	response to molecule of bacterial origin	10	130	0.01455	0.120739	1	1	1
GO:0002573	myeloid leukocyte differentiation	7	74	0.01478	0.120739	1	0.997941	1
GO:0018108	peptidyl-tyrosine phosphorylation	7	74	0.01478	0.120739	1	0.730465	1
GO:0018212	peptidyl-tyrosine modification	7	74	0.01478	0.120739	1	0.730465	1
GO:0002250	adaptive immune response	11	151	0.01511	0.120739	1	0.753245	1
GO:0002764	immune response-regulating signaling pathway	11	151	0.01511	0.120739	1	1	1
GO:0002455	humoral immune response mediated by circulating immunoglobulin	3	15	0.01515	0.120739	1	0.901085	1
GO:0010758	regulation of macrophage chemotaxis	3	15	0.01515	0.120739	1	1	1
GO:0045589	regulation of regulatory T cell differentiation	3	15	0.01515	0.120739	1	0.871694	1
GO:0070229	negative regulation of lymphocyte apoptotic process	3	15	0.01515	0.120739	1	0.826089	1
GO:2000403	positive regulation of lymphocyte migration	3	15	0.01515	0.120739	1	1	1
GO:0032623	interleukin-2 production	4	28	0.01658	0.129241	1	0.950167	1
GO:0043408	regulation of MAPK cascade	11	153	0.01663	0.129241	1	0.779355	1
GO:1901342	regulation of vasculature development	7	76	0.017	0.129241	1	1	1
GO:0050896	response to stimulus	39	943	0.0174	0.129241	1	1	1
GO:1903038	negative regulation of leukocyte cell-cell adhesion	5	43	0.01741	0.129241	1	0.90114	1
GO:0002903	negative regulation of B cell apoptotic process	2	6	0.01779	0.129241	1	0.673255	1
GO:0032493	response to bacterial lipoprotein	2	6	0.01779	0.129241	1	1	1
GO:0036006	cellular response to macrophage colony-stimulating factor stimulus	2	6	0.01779	0.129241	1	0.673255	1
GO:0043312	neutrophil degranulation	2	6	0.01779	0.129241	1	1	1
GO:0043383	negative T cell selection	2	6	0.01779	0.129241	1	1	1
GO:0061760	antifungal innate immune response	2	6	0.01779	0.129241	1	0.673255	1
GO:0070339	response to bacterial lipopeptide	2	6	0.01779	0.129241	1	1	1
GO:0071220	cellular response to bacterial lipoprotein	2	6	0.01779	0.129241	1	1	1
GO:0071221	cellular response to bacterial lipopeptide	2	6	0.01779	0.129241	1	1	1
GO:0098543	detection of other organism	2	6	0.01779	0.129241	1	0.730465	1
GO:0140131	positive regulation of lymphocyte chemotaxis	2	6	0.01779	0.129241	1	1	1
GO:1990840	response to lectin	2	6	0.01779	0.129241	1	1	1
GO:1990858	cellular response to lectin	2	6	0.01779	0.129241	1	1	1
GO:0001780	neutrophil homeostasis	3	16	0.01818	0.129241	1	0.826089	1
GO:0002673	regulation of acute inflammatory response	3	16	0.01818	0.129241	1	0.691081	1
GO:0045066	regulatory T cell differentiation	3	16	0.01818	0.129241	1	0.889693	1
GO:1905523	positive regulation of macrophage migration	3	16	0.01818	0.129241	1	1	1
GO:1902107	positive regulation of leukocyte differentiation	7	77	0.01819	0.129241	1	0.889693	1
GO:1903708	positive regulation of hemopoiesis	7	77	0.01819	0.129241	1	0.889693	1
GO:0002253	activation of immune response	11	155	0.01826	0.129301	1	1	1
GO:0051209	release of sequestered calcium ion into cytosol	4	29	0.01873	0.131298	1	0.673255	1
GO:0051282	regulation of sequestering of calcium ion	4	29	0.01873	0.131298	1	1	1
GO:0051283	negative regulation of sequestering of calcium ion	4	29	0.01873	0.131298	1	1	1
GO:0002831	regulation of response to biotic stimulus	11	156	0.01912	0.133585	1	0.846128	1
GO:0098771	inorganic ion homeostasis	7	78	0.01945	0.135439	1	1	1
GO:0022603	regulation of anatomical structure morphogenesis	11	157	0.02001	0.138877	1	0.826089	1
GO:0050670	regulation of lymphocyte proliferation	8	97	0.02008	0.138903	1	1	1
GO:0002526	acute inflammatory response	4	30	0.02105	0.144186	1	0.779355	1
GO:0051208	sequestering of calcium ion	4	30	0.02105	0.144186	1	1	1
GO:0070228	regulation of lymphocyte apoptotic process	4	30	0.02105	0.144186	1	0.757347	1
GO:0002279	mast cell activation involved in immune response	3	17	0.02153	0.14451	1	0.911559	1
GO:0002701	negative regulation of production of molecular mediator of immune response	3	17	0.02153	0.14451	1	1	1
GO:0006925	inflammatory cell apoptotic process	3	17	0.02153	0.14451	1	0.846128	1
GO:0032928	regulation of superoxide anion generation	3	17	0.02153	0.14451	1	1	1
GO:0043300	regulation of leukocyte degranulation	3	17	0.02153	0.14451	1	1	1
GO:0045577	regulation of B cell differentiation	3	17	0.02153	0.14451	1	0.673255	1
GO:0060284	regulation of cell development	13	202	0.02158	0.14451	1	1	1
GO:0022407	regulation of cell-cell adhesion	10	138	0.0217	0.144851	1	0.824395	1
GO:0002819	regulation of adaptive immune response	7	80	0.02214	0.147319	1	0.691081	1
GO:0032642	regulation of chemokine production	5	46	0.02287	0.151216	1	0.713385	1
GO:0032652	regulation of interleukin-1 production	5	46	0.02287	0.151216	1	0.891869	1
GO:1903037	regulation of leukocyte cell-cell adhesion	9	119	0.02306	0.151773	1	0.753245	1
GO:0032675	regulation of interleukin-6 production	6	63	0.02339	0.151773	1	0.781221	1
GO:0031347	regulation of defense response	14	227	0.02376	0.151773	1	0.812074	1
GO:0032944	regulation of mononuclear cell proliferation	8	100	0.02381	0.151773	1	1	1
GO:0002757	immune response-activating signaling pathway	10	140	0.02384	0.151773	1	1	1
GO:0010628	positive regulation of gene expression	17	298	0.02429	0.151773	1	0.946231	1
GO:0001771	immunological synapse formation	2	7	0.02433	0.151773	1	0.673255	1
GO:0001794	type IIa hypersensitivity	2	7	0.02433	0.151773	1	1	1
GO:0002445	type II hypersensitivity	2	7	0.02433	0.151773	1	1	1
GO:0009988	cell-cell recognition	2	7	0.02433	0.151773	1	1	1
GO:0032621	interleukin-18 production	2	7	0.02433	0.151773	1	1	1
GO:0036005	response to macrophage colony-stimulating factor	2	7	0.02433	0.151773	1	1	1
GO:0036462	TRAIL-activated apoptotic signaling pathway	2	7	0.02433	0.151773	1	0.753245	1
GO:0045671	negative regulation of osteoclast differentiation	2	7	0.02433	0.151773	1	0.673255	1
GO:0071774	response to fibroblast growth factor	2	7	0.02433	0.151773	1	1	1
GO:1903306	negative regulation of regulated secretory pathway	2	7	0.02433	0.151773	1	1	1
GO:0030001	metal ion transport	8	101	0.02516	0.155289	1	1	1
GO:0051851	modulation by host of symbiont process	3	18	0.02519	0.155289	1	1	1
GO:0031349	positive regulation of defense response	11	163	0.02602	0.159235	1	0.779355	1
GO:0010720	positive regulation of cell development	10	142	0.02614	0.159235	1	0.812074	1
GO:0032637	interleukin-8 production	4	32	0.02621	0.159235	1	1	1
GO:0071346	cellular response to type II interferon	4	32	0.02621	0.159235	1	0.673255	1
GO:0030003	intracellular monoatomic cation homeostasis	7	83	0.02665	0.16144	1	1	1
GO:0042221	response to chemical	29	620	0.02675	0.161579	1	1	1
GO:2000106	regulation of leukocyte apoptotic process	5	48	0.02707	0.163042	1	0.889693	1
GO:0006873	intracellular monoatomic ion homeostasis	7	84	0.02829	0.169902	1	1	1
GO:0002706	regulation of lymphocyte mediated immunity	6	66	0.02882	0.171203	1	0.743934	1
GO:0032635	interleukin-6 production	6	66	0.02882	0.171203	1	0.818161	1
GO:0002752	cell surface pattern recognition receptor signaling pathway	4	33	0.02904	0.171203	1	0.673255	1
GO:0032731	positive regulation of interleukin-1 beta production	4	33	0.02904	0.171203	1	0.673255	1
GO:0033032	regulation of myeloid cell apoptotic process	3	19	0.02916	0.171203	1	0.889693	1
GO:0033627	cell adhesion mediated by integrin	3	19	0.02916	0.171203	1	0.889693	1
GO:0060761	negative regulation of response to cytokine stimulus	3	19	0.02916	0.171203	1	0.691081	1
GO:0008283	cell population proliferation	20	379	0.02978	0.174354	1	0.779355	1
GO:0042127	regulation of cell population proliferation	18	330	0.03084	0.180057	1	0.812074	1
GO:0001781	neutrophil apoptotic process	2	8	0.0317	0.181009	1	1	1
GO:0002883	regulation of hypersensitivity	2	8	0.0317	0.181009	1	0.779355	1
GO:0032604	granulocyte macrophage colony-stimulating factor production	2	8	0.0317	0.181009	1	0.779355	1
GO:0006811	monoatomic ion transport	9	126	0.03239	0.181009	1	1	1
GO:0033028	myeloid cell apoptotic process	3	20	0.03345	0.181009	1	0.90114	1
GO:0090322	regulation of superoxide metabolic process	3	20	0.03345	0.181009	1	1	1
GO:0055080	monoatomic cation homeostasis	7	87	0.03361	0.181009	1	1	1
GO:0050852	T cell receptor signaling pathway	4	35	0.03526	0.181009	1	1	1
GO:0007159	leukocyte cell-cell adhesion	9	128	0.03549	0.181009	1	0.779355	1
GO:0050801	monoatomic ion homeostasis	7	88	0.03553	0.181009	1	1	1
GO:0002736	regulation of plasmacytoid dendritic cell cytokine production	1	1	0.03653	0.181009	1	1	1
GO:0002737	negative regulation of plasmacytoid dendritic cell cytokine production	1	1	0.03653	0.181009	1	0.673255	1
GO:0014062	regulation of serotonin secretion	1	1	0.03653	0.181009	1	1	1
GO:0014064	positive regulation of serotonin secretion	1	1	0.03653	0.181009	1	0.673255	1
GO:0016046	detection of fungus	1	1	0.03653	0.181009	1	1	1
GO:0032491	detection of molecule of fungal origin	1	1	0.03653	0.181009	1	0.673255	1
GO:0035687	T-helper 1 cell extravasation	1	1	0.03653	0.181009	1	1	1
GO:0035689	chemokine (C-C motif) ligand 5 signaling pathway	1	1	0.03653	0.181009	1	0.673255	1
GO:0036035	osteoclast development	1	1	0.03653	0.181009	1	1	1
GO:0060232	delamination	1	1	0.03653	0.181009	1	1	1
GO:0075733	intracellular transport of virus	1	1	0.03653	0.181009	1	1	1
GO:0098751	bone cell development	1	1	0.03653	0.181009	1	1	1
GO:1900623	regulation of monocyte aggregation	1	1	0.03653	0.181009	1	1	1
GO:1901252	regulation of intracellular transport of viral material	1	1	0.03653	0.181009	1	1	1
GO:1902215	negative regulation of interleukin-4-mediated signaling pathway	1	1	0.03653	0.181009	1	0.673255	1
GO:1903121	regulation of TRAIL-activated apoptotic signaling pathway	1	1	0.03653	0.181009	1	1	1
GO:2000502	negative regulation of natural killer cell chemotaxis	1	1	0.03653	0.181009	1	0.673255	1
GO:2000523	regulation of T cell costimulation	1	1	0.03653	0.181009	1	1	1
GO:2000527	regulation of myeloid dendritic cell chemotaxis	1	1	0.03653	0.181009	1	1	1
GO:2001204	regulation of osteoclast development	1	1	0.03653	0.181009	1	1	1
GO:2001206	positive regulation of osteoclast development	1	1	0.03653	0.181009	1	0.673255	1
GO:0042129	regulation of T cell proliferation	6	70	0.03729	0.184339	1	0.673255	1
GO:0051179	localization	24	493	0.038	0.185519	1	1	1
GO:0002478	antigen processing and presentation of exogenous peptide antigen	3	21	0.03805	0.185519	1	0.911559	1
GO:0042554	superoxide anion generation	3	21	0.03805	0.185519	1	1	1
GO:0071622	regulation of granulocyte chemotaxis	3	21	0.03805	0.185519	1	1	1
GO:0032732	positive regulation of interleukin-1 production	4	36	0.03863	0.185519	1	1	1
GO:0045619	regulation of lymphocyte differentiation	6	71	0.03964	0.185519	1	1	1
GO:0070371	ERK1 and ERK2 cascade	6	71	0.03964	0.185519	1	1	1
GO:0002291	T cell activation via T cell receptor contact with antigen bound to MHC molecule on antigen presenting cell	2	9	0.03983	0.185519	1	0.673255	1
GO:0002313	mature B cell differentiation involved in immune response	2	9	0.03983	0.185519	1	0.673255	1
GO:0002407	dendritic cell chemotaxis	2	9	0.03983	0.185519	1	1	1
GO:0002523	leukocyte migration involved in inflammatory response	2	9	0.03983	0.185519	1	0.673255	1
GO:0002524	hypersensitivity	2	9	0.03983	0.185519	1	1	1
GO:0002864	regulation of acute inflammatory response to antigenic stimulus	2	9	0.03983	0.185519	1	0.812074	1
GO:0030889	negative regulation of B cell proliferation	2	9	0.03983	0.185519	1	0.673255	1
GO:0045061	thymic T cell selection	2	9	0.03983	0.185519	1	1	1
GO:0070391	response to lipoteichoic acid	2	9	0.03983	0.185519	1	1	1
GO:0071223	cellular response to lipoteichoic acid	2	9	0.03983	0.185519	1	0.673255	1
GO:0071605	monocyte chemotactic protein-1 production	2	9	0.03983	0.185519	1	1	1
GO:0071637	regulation of monocyte chemotactic protein-1 production	2	9	0.03983	0.185519	1	1	1
GO:0090280	positive regulation of calcium ion import	2	9	0.03983	0.185519	1	0.673255	1
GO:0090504	epiboly	2	9	0.03983	0.185519	1	1	1
GO:0090505	epiboly involved in wound healing	2	9	0.03983	0.185519	1	1	1
GO:0030099	myeloid cell differentiation	8	110	0.03983	0.185519	1	1	1
GO:0007165	signal transduction	32	726	0.04089	0.190034	1	1	1
GO:0000165	MAPK cascade	11	175	0.04196	0.194576	1	0.905393	1
GO:0070227	lymphocyte apoptotic process	4	37	0.04219	0.19521	1	0.844728	1
GO:0002437	inflammatory response to antigenic stimulus	3	22	0.04296	0.197033	1	0.928351	1
GO:0019884	antigen processing and presentation of exogenous antigen	3	22	0.04296	0.197033	1	0.915393	1
GO:0032963	collagen metabolic process	3	22	0.04296	0.197033	1	0.90114	1
GO:0006812	monoatomic cation transport	8	112	0.04375	0.200218	1	1	1
GO:0001776	leukocyte homeostasis	5	55	0.04555	0.208002	1	0.781221	1
GO:0050727	regulation of inflammatory response	8	113	0.04581	0.208375	1	0.691081	1
GO:0032722	positive regulation of chemokine production	4	38	0.04593	0.208375	1	0.826089	1
GO:0045639	positive regulation of myeloid cell differentiation	4	38	0.04593	0.208375	1	1	1
GO:0002822	regulation of adaptive immune response based on somatic recombination of immune receptors built from immunoglobulin superfamily domains	6	74	0.04725	0.213901	1	0.791374	1
GO:0030097	hemopoiesis	13	224	0.04753	0.214423	1	1	1
GO:0010629	negative regulation of gene expression	12	201	0.04757	0.214423	1	1	1
GO:0009620	response to fungus	3	23	0.04818	0.214675	1	0.928351	1
GO:1905521	regulation of macrophage migration	3	23	0.04818	0.214675	1	1	1
GO:0002438	acute inflammatory response to antigenic stimulus	2	10	0.04865	0.214675	1	1	1
GO:0002762	negative regulation of myeloid leukocyte differentiation	2	10	0.04865	0.214675	1	1	1
GO:0006910	phagocytosis, recognition	2	10	0.04865	0.214675	1	0.673527	1
GO:0010714	positive regulation of collagen metabolic process	2	10	0.04865	0.214675	1	1	1
GO:0035739	CD4-positive, alpha-beta T cell proliferation	2	10	0.04865	0.214675	1	0.673527	1
GO:0045662	negative regulation of myoblast differentiation	2	10	0.04865	0.214675	1	0.673527	1
GO:0060142	regulation of syncytium formation by plasma membrane fusion	2	10	0.04865	0.214675	1	0.673527	1
GO:2000406	positive regulation of T cell migration	2	10	0.04865	0.214675	1	0.673527	1
GO:0002700	regulation of production of molecular mediator of immune response	6	75	0.04998	0.219706	1	0.911559	1
GO:0008285	negative regulation of cell population proliferation	9	136	0.05	0.219706	1	1	1
GO:0007155	cell adhesion	14	250	0.05142	0.225473	1	1	1
GO:0002262	myeloid cell homeostasis	5	57	0.05195	0.227322	1	0.812074	1
GO:0002637	regulation of immunoglobulin production	3	24	0.0537	0.232552	1	0.94201	1
GO:0042130	negative regulation of T cell proliferation	3	24	0.0537	0.232552	1	0.673527	1
GO:0045123	cellular extravasation	3	24	0.0537	0.232552	1	0.753245	1
GO:0045576	mast cell activation	3	24	0.0537	0.232552	1	0.997941	1
GO:1903305	regulation of regulated secretory pathway	3	24	0.0537	0.232552	1	1	1
GO:0097553	calcium ion transmembrane import into cytosol	4	40	0.05396	0.232708	1	1	1
GO:0098609	cell-cell adhesion	11	182	0.05399	0.232708	1	1	1
GO:0045088	regulation of innate immune response	9	138	0.05418	0.232708	1	0.911559	1
GO:0048514	blood vessel morphogenesis	9	138	0.05418	0.232708	1	1	1
GO:0071887	leukocyte apoptotic process	5	58	0.05535	0.237247	1	0.938754	1
GO:0045089	positive regulation of innate immune response	8	118	0.05706	0.244077	1	0.967817	1
GO:0002710	negative regulation of T cell mediated immunity	2	11	0.05811	0.244575	1	0.673527	1
GO:0002902	regulation of B cell apoptotic process	2	11	0.05811	0.244575	1	1	1
GO:0006470	protein dephosphorylation	2	11	0.05811	0.244575	1	0.673527	1
GO:0033033	negative regulation of myeloid cell apoptotic process	2	11	0.05811	0.244575	1	0.673527	1
GO:0033628	regulation of cell adhesion mediated by integrin	2	11	0.05811	0.244575	1	1	1
GO:0034134	toll-like receptor 2 signaling pathway	2	11	0.05811	0.244575	1	0.673527	1
GO:0036336	dendritic cell migration	2	11	0.05811	0.244575	1	1	1
GO:0061097	regulation of protein tyrosine kinase activity	2	11	0.05811	0.244575	1	0.673527	1
GO:0045055	regulated exocytosis	4	41	0.05825	0.244673	1	1	1
GO:0002312	B cell activation involved in immune response	3	25	0.05951	0.24855	1	0.916218	1
GO:0051702	biological process involved in interaction with symbiont	3	25	0.05951	0.24855	1	1	1
GO:0030155	regulation of cell adhesion	11	185	0.05981	0.24855	1	1	1
GO:0032496	response to lipopolysaccharide	8	120	0.06203	0.24855	1	1	1
GO:0002440	production of molecular mediator of immune response	7	100	0.06446	0.24855	1	1	1
GO:0070887	cellular response to chemical stimulus	20	408	0.06447	0.24855	1	1	1
GO:0050863	regulation of T cell activation	8	121	0.06462	0.24855	1	1	1
GO:0031640	killing of cells of another organism	3	26	0.0656	0.24855	1	0.673527	1
GO:0045429	positive regulation of nitric oxide biosynthetic process	3	26	0.0656	0.24855	1	0.673527	1
GO:0141060	disruption of anatomical structure in another organism	3	26	0.0656	0.24855	1	0.673527	1
GO:0141061	disruption of cell in another organism	3	26	0.0656	0.24855	1	0.673527	1
GO:1904407	positive regulation of nitric oxide metabolic process	3	26	0.0656	0.24855	1	0.673527	1
GO:0051651	maintenance of location in cell	4	43	0.06736	0.24855	1	1	1
GO:0001783	B cell apoptotic process	2	12	0.06815	0.24855	1	1	1
GO:0002335	mature B cell differentiation	2	12	0.06815	0.24855	1	1	1
GO:0002675	positive regulation of acute inflammatory response	2	12	0.06815	0.24855	1	0.673527	1
GO:0006953	acute-phase response	2	12	0.06815	0.24855	1	0.673527	1
GO:0045920	negative regulation of exocytosis	2	12	0.06815	0.24855	1	1	1
GO:0051770	positive regulation of nitric-oxide synthase biosynthetic process	2	12	0.06815	0.24855	1	0.673527	1
GO:0070741	response to interleukin-6	2	12	0.06815	0.24855	1	0.673527	1
GO:0071354	cellular response to interleukin-6	2	12	0.06815	0.24855	1	0.673527	1
GO:0098581	detection of external biotic stimulus	2	12	0.06815	0.24855	1	0.87361	1
GO:2000404	regulation of T cell migration	2	12	0.06815	0.24855	1	1	1
GO:0048646	anatomical structure formation involved in morphogenesis	12	213	0.07	0.24855	1	1	1
GO:0050793	regulation of developmental process	19	386	0.07086	0.24855	1	1	1
GO:0001766	membrane raft polarization	1	2	0.07176	0.24855	1	0.673527	1
GO:0002273	plasmacytoid dendritic cell differentiation	1	2	0.07176	0.24855	1	0.673527	1
GO:0002277	myeloid dendritic cell activation involved in immune response	1	2	0.07176	0.24855	1	0.673527	1
GO:0002314	germinal center B cell differentiation	1	2	0.07176	0.24855	1	0.673527	1
GO:0002408	myeloid dendritic cell chemotaxis	1	2	0.07176	0.24855	1	1	1
GO:0002572	pro-T cell differentiation	1	2	0.07176	0.24855	1	0.673527	1
GO:0002669	positive regulation of T cell anergy	1	2	0.07176	0.24855	1	0.673527	1
GO:0002725	negative regulation of T cell cytokine production	1	2	0.07176	0.24855	1	0.673527	1
GO:0002731	negative regulation of dendritic cell cytokine production	1	2	0.07176	0.24855	1	1	1
GO:0002774	Fc receptor mediated inhibitory signaling pathway	1	2	0.07176	0.24855	1	0.673527	1
GO:0002884	negative regulation of hypersensitivity	1	2	0.07176	0.24855	1	1	1
GO:0002913	positive regulation of lymphocyte anergy	1	2	0.07176	0.24855	1	0.673527	1
GO:0007567	parturition	1	2	0.07176	0.24855	1	1	1
GO:0010518	positive regulation of phospholipase activity	1	2	0.07176	0.24855	1	1	1
GO:0010820	positive regulation of T cell chemotaxis	1	2	0.07176	0.24855	1	0.673527	1
GO:0030214	hyaluronan catabolic process	1	2	0.07176	0.24855	1	0.673527	1
GO:0031580	membrane raft distribution	1	2	0.07176	0.24855	1	0.673527	1
GO:0032701	negative regulation of interleukin-18 production	1	2	0.07176	0.24855	1	0.673527	1
GO:0032714	negative regulation of interleukin-5 production	1	2	0.07176	0.24855	1	0.673527	1
GO:0032911	negative regulation of transforming growth factor beta1 production	1	2	0.07176	0.24855	1	0.673527	1
GO:0033030	negative regulation of neutrophil apoptotic process	1	2	0.07176	0.24855	1	0.673527	1
GO:0033632	regulation of cell-cell adhesion mediated by integrin	1	2	0.07176	0.24855	1	0.673527	1
GO:0033634	positive regulation of cell-cell adhesion mediated by integrin	1	2	0.07176	0.24855	1	0.673527	1
GO:0034241	positive regulation of macrophage fusion	1	2	0.07176	0.24855	1	0.673527	1
GO:0035335	peptidyl-tyrosine dephosphorylation	1	2	0.07176	0.24855	1	0.673527	1
GO:0035685	helper T cell diapedesis	1	2	0.07176	0.24855	1	1	1
GO:0035900	response to isolation stress	1	2	0.07176	0.24855	1	0.673527	1
GO:0036483	neuron intrinsic apoptotic signaling pathway in response to endoplasmic reticulum stress	1	2	0.07176	0.24855	1	0.673527	1
GO:0042117	monocyte activation	1	2	0.07176	0.24855	1	1	1
GO:0042495	detection of triacyl bacterial lipopeptide	1	2	0.07176	0.24855	1	0.673527	1
GO:0042496	detection of diacyl bacterial lipopeptide	1	2	0.07176	0.24855	1	0.673527	1
GO:0043305	negative regulation of mast cell degranulation	1	2	0.07176	0.24855	1	0.673527	1
GO:0043314	negative regulation of neutrophil degranulation	1	2	0.07176	0.24855	1	0.673527	1
GO:0043315	positive regulation of neutrophil degranulation	1	2	0.07176	0.24855	1	0.673527	1
GO:0043376	regulation of CD8-positive, alpha-beta T cell differentiation	1	2	0.07176	0.24855	1	0.673527	1
GO:0043378	positive regulation of CD8-positive, alpha-beta T cell differentiation	1	2	0.07176	0.24855	1	0.673527	1
GO:0044793	negative regulation by host of viral process	1	2	0.07176	0.24855	1	1	1
GO:0044827	modulation by host of viral genome replication	1	2	0.07176	0.24855	1	1	1
GO:0045065	cytotoxic T cell differentiation	1	2	0.07176	0.24855	1	1	1
GO:0045109	intermediate filament organization	1	2	0.07176	0.24855	1	0.673527	1
GO:0045578	negative regulation of B cell differentiation	1	2	0.07176	0.24855	1	0.673527	1
GO:0045583	regulation of cytotoxic T cell differentiation	1	2	0.07176	0.24855	1	1	1
GO:0046794	transport of virus	1	2	0.07176	0.24855	1	1	1
GO:0048539	bone marrow development	1	2	0.07176	0.24855	1	0.673527	1
GO:0050859	negative regulation of B cell receptor signaling pathway	1	2	0.07176	0.24855	1	0.673527	1
GO:0060054	positive regulation of epithelial cell proliferation involved in wound healing	1	2	0.07176	0.24855	1	0.673527	1
GO:0060309	elastin catabolic process	1	2	0.07176	0.24855	1	0.673527	1
GO:0060369	positive regulation of Fc receptor mediated stimulatory signaling pathway	1	2	0.07176	0.24855	1	0.673527	1
GO:0060435	bronchiole development	1	2	0.07176	0.24855	1	0.673527	1
GO:0060442	branching involved in prostate gland morphogenesis	1	2	0.07176	0.24855	1	0.673527	1
GO:0060754	positive regulation of mast cell chemotaxis	1	2	0.07176	0.24855	1	0.673527	1
GO:0070100	negative regulation of chemokine-mediated signaling pathway	1	2	0.07176	0.24855	1	0.673527	1
GO:0072673	lamellipodium morphogenesis	1	2	0.07176	0.24855	1	0.673527	1
GO:0090402	oncogene-induced cell senescence	1	2	0.07176	0.24855	1	0.673527	1
GO:0090674	endothelial cell-matrix adhesion via fibronectin	1	2	0.07176	0.24855	1	1	1
GO:0160006	Fc receptor-mediated immune complex endocytosis	1	2	0.07176	0.24855	1	0.673527	1
GO:1900099	negative regulation of plasma cell differentiation	1	2	0.07176	0.24855	1	0.673527	1
GO:1900147	regulation of Schwann cell migration	1	2	0.07176	0.24855	1	0.673527	1
GO:1901624	negative regulation of lymphocyte chemotaxis	1	2	0.07176	0.24855	1	1	1
GO:1901740	negative regulation of myoblast fusion	1	2	0.07176	0.24855	1	0.673527	1
GO:1903381	regulation of endoplasmic reticulum stress-induced neuron intrinsic apoptotic signaling pathway	1	2	0.07176	0.24855	1	0.673527	1
GO:1903971	positive regulation of response to macrophage colony-stimulating factor	1	2	0.07176	0.24855	1	0.673527	1
GO:1903974	positive regulation of cellular response to macrophage colony-stimulating factor stimulus	1	2	0.07176	0.24855	1	0.673527	1
GO:1904464	regulation of matrix metallopeptidase secretion	1	2	0.07176	0.24855	1	0.673527	1
GO:1904466	positive regulation of matrix metallopeptidase secretion	1	2	0.07176	0.24855	1	0.673527	1
GO:1904783	positive regulation of NMDA glutamate receptor activity	1	2	0.07176	0.24855	1	0.673527	1
GO:1904904	regulation of endothelial cell-matrix adhesion via fibronectin	1	2	0.07176	0.24855	1	1	1
GO:1905034	regulation of antifungal innate immune response	1	2	0.07176	0.24855	1	0.673527	1
GO:1905036	positive regulation of antifungal innate immune response	1	2	0.07176	0.24855	1	0.673527	1
GO:1905453	regulation of myeloid progenitor cell differentiation	1	2	0.07176	0.24855	1	0.673527	1
GO:1905634	regulation of protein localization to chromatin	1	2	0.07176	0.24855	1	1	1
GO:1990773	matrix metallopeptidase secretion	1	2	0.07176	0.24855	1	0.673527	1
GO:2000392	regulation of lamellipodium morphogenesis	1	2	0.07176	0.24855	1	0.673527	1
GO:2000471	regulation of hematopoietic stem cell migration	1	2	0.07176	0.24855	1	0.673527	1
GO:2000473	positive regulation of hematopoietic stem cell migration	1	2	0.07176	0.24855	1	0.673527	1
GO:2000520	regulation of immunological synapse formation	1	2	0.07176	0.24855	1	0.673527	1
GO:2000521	negative regulation of immunological synapse formation	1	2	0.07176	0.24855	1	0.673527	1
GO:2001189	negative regulation of T cell activation via T cell receptor contact with antigen bound to MHC molecule on antigen presenting cell	1	2	0.07176	0.24855	1	0.673527	1
GO:0006801	superoxide metabolic process	3	27	0.07198	0.24855	1	1	1
GO:0016525	negative regulation of angiogenesis	3	27	0.07198	0.24855	1	0.673527	1
GO:0050848	regulation of calcium-mediated signaling	3	27	0.07198	0.24855	1	1	1
GO:1901343	negative regulation of vasculature development	3	27	0.07198	0.24855	1	0.673527	1
GO:2000181	negative regulation of blood vessel morphogenesis	3	27	0.07198	0.24855	1	0.673527	1
GO:0002833	positive regulation of response to biotic stimulus	8	124	0.07279	0.250522	1	1	1
GO:0043410	positive regulation of MAPK cascade	8	124	0.07279	0.250522	1	0.678079	1
GO:0051239	regulation of multicellular organismal process	24	520	0.07307	0.251073	1	1	1
GO:0007154	cell communication	32	751	0.07542	0.258301	1	1	1
GO:0023052	signaling	32	751	0.07542	0.258301	1	1	1
GO:0045766	positive regulation of angiogenesis	4	45	0.07719	0.262734	1	0.691081	1
GO:0050731	positive regulation of peptidyl-tyrosine phosphorylation	4	45	0.07719	0.262734	1	0.691081	1
GO:0001525	angiogenesis	8	126	0.07859	0.262734	1	1	1
GO:0031663	lipopolysaccharide-mediated signaling pathway	3	28	0.07863	0.262734	1	0.974431	1
GO:0002011	morphogenesis of an epithelial sheet	2	13	0.07872	0.262734	1	1	1
GO:0002474	antigen processing and presentation of peptide antigen via MHC class I	2	13	0.07872	0.262734	1	1	1
GO:0002507	tolerance induction	2	13	0.07872	0.262734	1	0.889693	1
GO:0002719	negative regulation of cytokine production involved in immune response	2	13	0.07872	0.262734	1	0.889693	1
GO:0007520	myoblast fusion	2	13	0.07872	0.262734	1	0.691081	1
GO:0032964	collagen biosynthetic process	2	13	0.07872	0.262734	1	1	1
GO:0032965	regulation of collagen biosynthetic process	2	13	0.07872	0.262734	1	1	1
GO:0051767	nitric-oxide synthase biosynthetic process	2	13	0.07872	0.262734	1	0.691081	1
GO:0051769	regulation of nitric-oxide synthase biosynthetic process	2	13	0.07872	0.262734	1	0.691081	1
GO:0070509	calcium ion import	2	13	0.07872	0.262734	1	1	1
GO:0090279	regulation of calcium ion import	2	13	0.07872	0.262734	1	1	1
GO:1902041	regulation of extrinsic apoptotic signaling pathway via death domain receptors	2	13	0.07872	0.262734	1	0.889693	1
GO:0051093	negative regulation of developmental process	10	171	0.07985	0.266082	1	1	1
GO:0032940	secretion by cell	8	127	0.08159	0.271449	1	1	1
GO:0030183	B cell differentiation	4	46	0.08236	0.273576	1	1	1
GO:0042060	wound healing	6	85	0.0827	0.274271	1	0.826089	1
GO:0140352	export from cell	8	128	0.08467	0.280361	1	1	1
GO:0019079	viral genome replication	3	29	0.08554	0.281463	1	0.8225	1
GO:0030101	natural killer cell activation	3	29	0.08554	0.281463	1	0.691081	1
GO:0032757	positive regulation of interleukin-8 production	3	29	0.08554	0.281463	1	0.691081	1
GO:0048002	antigen processing and presentation of peptide antigen	3	29	0.08554	0.281463	1	1	1
GO:0042113	B cell activation	6	86	0.08652	0.284241	1	1	1
GO:0016064	immunoglobulin mediated immune response	4	47	0.08771	0.287578	1	1	1
GO:0071396	cellular response to lipid	8	129	0.08781	0.287578	1	1	1
GO:0051240	positive regulation of multicellular organismal process	19	396	0.08956	0.291718	1	1	1
GO:0002861	regulation of inflammatory response to antigenic stimulus	2	14	0.08977	0.291718	1	0.90114	1
GO:0010712	regulation of collagen metabolic process	2	14	0.08977	0.291718	1	1	1
GO:0070542	response to fatty acid	2	14	0.08977	0.291718	1	0.691081	1
GO:1902624	positive regulation of neutrophil migration	2	14	0.08977	0.291718	1	0.691081	1
GO:0001568	blood vessel development	9	153	0.09308	0.301526	1	1	1
GO:0050851	antigen receptor-mediated signaling pathway	4	48	0.09322	0.301526	1	1	1
GO:1904018	positive regulation of vasculature development	4	48	0.09322	0.301526	1	0.691081	1
GO:0002367	cytokine production involved in immune response	5	68	0.09634	0.306515	1	0.908504	1
GO:0070374	positive regulation of ERK1 and ERK2 cascade	4	49	0.0989	0.306515	1	0.691081	1
GO:0002244	hematopoietic progenitor cell differentiation	3	31	0.10011	0.306515	1	0.691081	1
GO:0006469	negative regulation of protein kinase activity	3	31	0.10011	0.306515	1	0.691081	1
GO:0001773	myeloid dendritic cell activation	2	15	0.10125	0.306515	1	0.691081	1
GO:0002446	neutrophil mediated immunity	2	15	0.10125	0.306515	1	1	1
GO:0009593	detection of chemical stimulus	2	15	0.10125	0.306515	1	0.908504	1
GO:0009595	detection of biotic stimulus	2	15	0.10125	0.306515	1	0.908504	1
GO:0010574	regulation of vascular endothelial growth factor production	2	15	0.10125	0.306515	1	0.691081	1
GO:0045638	negative regulation of myeloid cell differentiation	2	15	0.10125	0.306515	1	1	1
GO:0050691	regulation of defense response to virus by host	2	15	0.10125	0.306515	1	0.691081	1
GO:0050832	defense response to fungus	2	15	0.10125	0.306515	1	1	1
GO:0090594	inflammatory response to wounding	2	15	0.10125	0.306515	1	0.691081	1
GO:0010558	negative regulation of macromolecule biosynthetic process	14	275	0.10224	0.306515	1	1	1
GO:0019724	B cell mediated immunity	4	50	0.10474	0.306515	1	1	1
GO:0002249	lymphocyte anergy	1	3	0.10573	0.306515	1	0.691081	1
GO:0002278	eosinophil activation involved in immune response	1	3	0.10573	0.306515	1	0.691081	1
GO:0002316	follicular B cell differentiation	1	3	0.10573	0.306515	1	0.691081	1
GO:0002317	plasma cell differentiation	1	3	0.10573	0.306515	1	0.691081	1
GO:0002357	defense response to tumor cell	1	3	0.10573	0.306515	1	0.691081	1
GO:0002436	immune complex clearance by monocytes and macrophages	1	3	0.10573	0.306515	1	0.691081	1
GO:0002447	eosinophil mediated immunity	1	3	0.10573	0.306515	1	0.691081	1
GO:0002461	tolerance induction dependent upon immune response	1	3	0.10573	0.306515	1	1	1
GO:0002667	regulation of T cell anergy	1	3	0.10573	0.306515	1	0.691081	1
GO:0002767	immune response-inhibiting cell surface receptor signaling pathway	1	3	0.10573	0.306515	1	0.691081	1
GO:0002865	negative regulation of acute inflammatory response to antigenic stimulus	1	3	0.10573	0.306515	1	1	1
GO:0002870	T cell anergy	1	3	0.10573	0.306515	1	0.691081	1
GO:0002911	regulation of lymphocyte anergy	1	3	0.10573	0.306515	1	0.691081	1
GO:0006026	aminoglycan catabolic process	1	3	0.10573	0.306515	1	0.691081	1
GO:0006027	glycosaminoglycan catabolic process	1	3	0.10573	0.306515	1	0.691081	1
GO:0006929	substrate-dependent cell migration	1	3	0.10573	0.306515	1	1	1
GO:0010517	regulation of phospholipase activity	1	3	0.10573	0.306515	1	1	1
GO:0014808	release of sequestered calcium ion into cytosol by sarcoplasmic reticulum	1	3	0.10573	0.306515	1	0.691081	1
GO:0031268	pseudopodium organization	1	3	0.10573	0.306515	1	0.691081	1
GO:0031269	pseudopodium assembly	1	3	0.10573	0.306515	1	0.691081	1
GO:0031953	negative regulation of protein autophosphorylation	1	3	0.10573	0.306515	1	0.691081	1
GO:0032815	negative regulation of natural killer cell activation	1	3	0.10573	0.306515	1	0.691081	1
GO:0034114	regulation of heterotypic cell-cell adhesion	1	3	0.10573	0.306515	1	0.691081	1
GO:0034116	positive regulation of heterotypic cell-cell adhesion	1	3	0.10573	0.306515	1	0.691081	1
GO:0034239	regulation of macrophage fusion	1	3	0.10573	0.306515	1	0.691081	1
GO:0035697	CD8-positive, alpha-beta T cell extravasation	1	3	0.10573	0.306515	1	1	1
GO:0035702	monocyte homeostasis	1	3	0.10573	0.306515	1	0.691081	1
GO:0035855	megakaryocyte development	1	3	0.10573	0.306515	1	0.691081	1
GO:0036135	Schwann cell migration	1	3	0.10573	0.306515	1	0.691081	1
GO:0042494	detection of bacterial lipoprotein	1	3	0.10573	0.306515	1	0.691081	1
GO:0043307	eosinophil activation	1	3	0.10573	0.306515	1	0.691081	1
GO:0043308	eosinophil degranulation	1	3	0.10573	0.306515	1	0.691081	1
GO:0044351	macropinocytosis	1	3	0.10573	0.306515	1	0.691081	1
GO:0050904	diapedesis	1	3	0.10573	0.306515	1	1	1
GO:0051541	elastin metabolic process	1	3	0.10573	0.306515	1	0.691081	1
GO:0051665	membrane raft localization	1	3	0.10573	0.306515	1	0.691081	1
GO:0060193	positive regulation of lipase activity	1	3	0.10573	0.306515	1	1	1
GO:0060753	regulation of mast cell chemotaxis	1	3	0.10573	0.306515	1	0.691081	1
GO:0070296	sarcoplasmic reticulum calcium ion transport	1	3	0.10573	0.306515	1	0.691081	1
GO:0070307	lens fiber cell development	1	3	0.10573	0.306515	1	0.691081	1
GO:0070340	detection of bacterial lipopeptide	1	3	0.10573	0.306515	1	0.691081	1
GO:0070487	monocyte aggregation	1	3	0.10573	0.306515	1	1	1
GO:0071226	cellular response to molecule of fungal origin	1	3	0.10573	0.306515	1	0.691081	1
GO:0071392	cellular response to estradiol stimulus	1	3	0.10573	0.306515	1	0.691081	1
GO:0071635	negative regulation of transforming growth factor beta production	1	3	0.10573	0.306515	1	0.691081	1
GO:0071659	negative regulation of IP-10 production	1	3	0.10573	0.306515	1	0.691081	1
GO:0090264	regulation of immune complex clearance by monocytes and macrophages	1	3	0.10573	0.306515	1	0.691081	1
GO:0090265	positive regulation of immune complex clearance by monocytes and macrophages	1	3	0.10573	0.306515	1	0.691081	1
GO:0090673	endothelial cell-matrix adhesion	1	3	0.10573	0.306515	1	1	1
GO:0160162	CD27 signaling pathway	1	3	0.10573	0.306515	1	0.691081	1
GO:1900098	regulation of plasma cell differentiation	1	3	0.10573	0.306515	1	0.691081	1
GO:1900150	regulation of defense response to fungus	1	3	0.10573	0.306515	1	0.691081	1
GO:1901509	regulation of endothelial tube morphogenesis	1	3	0.10573	0.306515	1	0.691081	1
GO:1902214	regulation of interleukin-4-mediated signaling pathway	1	3	0.10573	0.306515	1	1	1
GO:1904178	negative regulation of adipose tissue development	1	3	0.10573	0.306515	1	0.691081	1
GO:1904238	pericyte cell differentiation	1	3	0.10573	0.306515	1	0.691081	1
GO:1905563	negative regulation of vascular endothelial cell proliferation	1	3	0.10573	0.306515	1	0.691081	1
GO:1905867	epididymis development	1	3	0.10573	0.306515	1	0.691081	1
GO:2000272	negative regulation of signaling receptor activity	1	3	0.10573	0.306515	1	0.691081	1
GO:2000402	negative regulation of lymphocyte migration	1	3	0.10573	0.306515	1	1	1
GO:0002285	lymphocyte activation involved in immune response	5	70	0.10603	0.30696	1	1	1
GO:0006809	nitric oxide biosynthetic process	3	32	0.10776	0.309404	1	0.691081	1
GO:0008625	extrinsic apoptotic signaling pathway via death domain receptors	3	32	0.10776	0.309404	1	0.846128	1
GO:0017157	regulation of exocytosis	3	32	0.10776	0.309404	1	1	1
GO:0033673	negative regulation of kinase activity	3	32	0.10776	0.309404	1	0.691081	1
GO:0045428	regulation of nitric oxide biosynthetic process	3	32	0.10776	0.309404	1	0.691081	1
GO:0140895	cell surface toll-like receptor signaling pathway	3	32	0.10776	0.309404	1	0.691081	1
GO:0031327	negative regulation of cellular biosynthetic process	14	278	0.11	0.315404	1	1	1
GO:0051607	defense response to virus	6	92	0.1115	0.319268	1	0.691081	1
GO:0002714	positive regulation of B cell mediated immunity	2	16	0.11311	0.320376	1	0.691081	1
GO:0002891	positive regulation of immunoglobulin mediated immune response	2	16	0.11311	0.320376	1	0.691081	1
GO:0010573	vascular endothelial growth factor production	2	16	0.11311	0.320376	1	0.691081	1
GO:0019083	viral transcription	2	16	0.11311	0.320376	1	1	1
GO:0032733	positive regulation of interleukin-10 production	2	16	0.11311	0.320376	1	0.691081	1
GO:0070373	negative regulation of ERK1 and ERK2 cascade	2	16	0.11311	0.320376	1	0.691081	1
GO:0071402	cellular response to lipoprotein particle stimulus	2	16	0.11311	0.320376	1	0.911559	1
GO:0090303	positive regulation of wound healing	2	16	0.11311	0.320376	1	0.691081	1
GO:0046209	nitric oxide metabolic process	3	33	0.11563	0.326192	1	0.691081	1
GO:0080164	regulation of nitric oxide metabolic process	3	33	0.11563	0.326192	1	0.691081	1
GO:2001057	reactive nitrogen species metabolic process	3	33	0.11563	0.326192	1	0.691081	1
GO:0023056	positive regulation of signaling	17	356	0.11591	0.326542	1	0.909717	1
GO:0048522	positive regulation of cellular process	31	741	0.11678	0.32842	1	1	1
GO:0060759	regulation of response to cytokine stimulus	4	52	0.11689	0.32842	1	0.826089	1
GO:0010647	positive regulation of cell communication	17	357	0.11845	0.332358	1	0.911559	1
GO:1903131	mononuclear cell differentiation	9	161	0.11946	0.334744	1	1	1
GO:0035239	tube morphogenesis	10	185	0.12153	0.340089	1	1	1
GO:0001944	vasculature development	9	162	0.12303	0.342685	1	1	1
GO:0002821	positive regulation of adaptive immune response	4	53	0.1232	0.342685	1	0.691081	1
GO:0030888	regulation of B cell proliferation	3	34	0.12372	0.342685	1	1	1
GO:0051348	negative regulation of transferase activity	3	34	0.12372	0.342685	1	0.691081	1
GO:0009611	response to wounding	7	117	0.12532	0.342685	1	0.871694	1
GO:0016311	dephosphorylation	2	17	0.12533	0.342685	1	0.691081	1
GO:0032743	positive regulation of interleukin-2 production	2	17	0.12533	0.342685	1	0.691081	1
GO:0045071	negative regulation of viral genome replication	2	17	0.12533	0.342685	1	0.691081	1
GO:0045661	regulation of myoblast differentiation	2	17	0.12533	0.342685	1	1	1
GO:0050765	negative regulation of phagocytosis	2	17	0.12533	0.342685	1	0.691081	1
GO:0051279	regulation of release of sequestered calcium ion into cytosol	2	17	0.12533	0.342685	1	0.691081	1
GO:1902622	regulation of neutrophil migration	2	17	0.12533	0.342685	1	0.691081	1
GO:0035295	tube development	11	211	0.12864	0.342685	1	1	1
GO:0009890	negative regulation of biosynthetic process	14	285	0.12954	0.342685	1	1	1
GO:0055082	intracellular chemical homeostasis	7	118	0.12962	0.342685	1	1	1
GO:0032479	regulation of type I interferon production	4	54	0.12965	0.342685	1	0.691081	1
GO:0050789	regulation of biological process	38	966	0.12981	0.342685	1	1	1
GO:0010605	negative regulation of macromolecule metabolic process	16	336	0.13078	0.342685	1	1	1
GO:0022604	regulation of cell morphogenesis	3	35	0.13201	0.342685	1	0.691081	1
GO:0043086	negative regulation of catalytic activity	5	75	0.13235	0.342685	1	0.691081	1
GO:0051668	localization within membrane	5	75	0.13235	0.342685	1	0.691081	1
GO:1903039	positive regulation of leukocyte cell-cell adhesion	6	97	0.13495	0.342685	1	0.911559	1
GO:0045595	regulation of cell differentiation	14	287	0.1355	0.342685	1	1	1
GO:0032606	type I interferon production	4	55	0.13624	0.342685	1	0.691081	1
GO:0032814	regulation of natural killer cell activation	2	18	0.13784	0.342685	1	0.691081	1
GO:0043277	apoptotic cell clearance	2	18	0.13784	0.342685	1	0.691081	1
GO:0043368	positive T cell selection	2	18	0.13784	0.342685	1	1	1
GO:0001767	establishment of lymphocyte polarity	1	4	0.13848	0.342685	1	0.691081	1
GO:0001768	establishment of T cell polarity	1	4	0.13848	0.342685	1	0.691081	1
GO:0001802	type III hypersensitivity	1	4	0.13848	0.342685	1	0.691081	1
GO:0001803	regulation of type III hypersensitivity	1	4	0.13848	0.342685	1	0.691081	1
GO:0001805	positive regulation of type III hypersensitivity	1	4	0.13848	0.342685	1	0.691081	1
GO:0001810	regulation of type I hypersensitivity	1	4	0.13848	0.342685	1	1	1
GO:0001915	negative regulation of T cell mediated cytotoxicity	1	4	0.13848	0.342685	1	0.691081	1
GO:0002115	store-operated calcium entry	1	4	0.13848	0.342685	1	0.691081	1
GO:0002674	negative regulation of acute inflammatory response	1	4	0.13848	0.342685	1	1	1
GO:0002689	negative regulation of leukocyte chemotaxis	1	4	0.13848	0.342685	1	1	1
GO:0002765	immune response-inhibiting signal transduction	1	4	0.13848	0.342685	1	0.691081	1
GO:0002901	mature B cell apoptotic process	1	4	0.13848	0.342685	1	0.691081	1
GO:0002905	regulation of mature B cell apoptotic process	1	4	0.13848	0.342685	1	0.691081	1
GO:0002906	negative regulation of mature B cell apoptotic process	1	4	0.13848	0.342685	1	0.691081	1
GO:0002925	positive regulation of humoral immune response mediated by circulating immunoglobulin	1	4	0.13848	0.342685	1	0.691081	1
GO:0009624	response to nematode	1	4	0.13848	0.342685	1	0.691081	1
GO:0014005	microglia development	1	4	0.13848	0.342685	1	0.691081	1
GO:0016068	type I hypersensitivity	1	4	0.13848	0.342685	1	1	1
GO:0030212	hyaluronan metabolic process	1	4	0.13848	0.342685	1	0.691081	1
GO:0031620	regulation of fever generation	1	4	0.13848	0.342685	1	0.691081	1
GO:0031622	positive regulation of fever generation	1	4	0.13848	0.342685	1	0.691081	1
GO:0031650	regulation of heat generation	1	4	0.13848	0.342685	1	0.691081	1
GO:0031652	positive regulation of heat generation	1	4	0.13848	0.342685	1	0.691081	1
GO:0032289	central nervous system myelin formation	1	4	0.13848	0.342685	1	0.691081	1
GO:0032456	endocytic recycling	1	4	0.13848	0.342685	1	0.691081	1
GO:0032741	positive regulation of interleukin-18 production	1	4	0.13848	0.342685	1	0.691081	1
GO:0032747	positive regulation of interleukin-23 production	1	4	0.13848	0.342685	1	0.691081	1
GO:0032905	transforming growth factor beta1 production	1	4	0.13848	0.342685	1	0.691081	1
GO:0032908	regulation of transforming growth factor beta1 production	1	4	0.13848	0.342685	1	0.691081	1
GO:0033631	cell-cell adhesion mediated by integrin	1	4	0.13848	0.342685	1	0.691081	1
GO:0034122	negative regulation of toll-like receptor signaling pathway	1	4	0.13848	0.342685	1	0.691081	1
GO:0034154	toll-like receptor 7 signaling pathway	1	4	0.13848	0.342685	1	0.691081	1
GO:0034242	negative regulation of syncytium formation by plasma membrane fusion	1	4	0.13848	0.342685	1	0.691081	1
GO:0035634	response to stilbenoid	1	4	0.13848	0.342685	1	0.691081	1
GO:0038124	toll-like receptor TLR6:TLR2 signaling pathway	1	4	0.13848	0.342685	1	0.691081	1
GO:0042118	endothelial cell activation	1	4	0.13848	0.342685	1	0.691081	1
GO:0046426	negative regulation of receptor signaling pathway via JAK-STAT	1	4	0.13848	0.342685	1	0.691081	1
GO:0046642	negative regulation of alpha-beta T cell proliferation	1	4	0.13848	0.342685	1	0.691081	1
GO:0048291	isotype switching to IgG isotypes	1	4	0.13848	0.342685	1	0.691081	1
GO:0048302	regulation of isotype switching to IgG isotypes	1	4	0.13848	0.342685	1	0.691081	1
GO:0048304	positive regulation of isotype switching to IgG isotypes	1	4	0.13848	0.342685	1	0.691081	1
GO:0050855	regulation of B cell receptor signaling pathway	1	4	0.13848	0.342685	1	0.691081	1
GO:0051930	regulation of sensory perception of pain	1	4	0.13848	0.342685	1	0.691081	1
GO:0051931	regulation of sensory perception	1	4	0.13848	0.342685	1	0.691081	1
GO:0051964	negative regulation of synapse assembly	1	4	0.13848	0.342685	1	0.691081	1
GO:0060020	Bergmann glial cell differentiation	1	4	0.13848	0.342685	1	0.691081	1
GO:0060056	mammary gland involution	1	4	0.13848	0.342685	1	0.691081	1
GO:0061099	negative regulation of protein tyrosine kinase activity	1	4	0.13848	0.342685	1	0.691081	1
GO:0070099	regulation of chemokine-mediated signaling pathway	1	4	0.13848	0.342685	1	0.691081	1
GO:0071225	cellular response to muramyl dipeptide	1	4	0.13848	0.342685	1	0.691081	1
GO:0071398	cellular response to fatty acid	1	4	0.13848	0.342685	1	0.691081	1
GO:0071612	IP-10 production	1	4	0.13848	0.342685	1	0.691081	1
GO:0071658	regulation of IP-10 production	1	4	0.13848	0.342685	1	0.691081	1
GO:0071863	regulation of cell proliferation in bone marrow	1	4	0.13848	0.342685	1	1	1
GO:0072110	glomerular mesangial cell proliferation	1	4	0.13848	0.342685	1	0.691081	1
GO:0072124	regulation of glomerular mesangial cell proliferation	1	4	0.13848	0.342685	1	0.691081	1
GO:0072126	positive regulation of glomerular mesangial cell proliferation	1	4	0.13848	0.342685	1	0.691081	1
GO:0106015	negative regulation of inflammatory response to wounding	1	4	0.13848	0.342685	1	0.691081	1
GO:0140367	antibacterial innate immune response	1	4	0.13848	0.342685	1	0.691081	1
GO:1902043	positive regulation of extrinsic apoptotic signaling pathway via death domain receptors	1	4	0.13848	0.342685	1	1	1
GO:1902262	apoptotic process involved in blood vessel morphogenesis	1	4	0.13848	0.342685	1	0.691081	1
GO:1903431	positive regulation of cell maturation	1	4	0.13848	0.342685	1	0.691081	1
GO:1903514	release of sequestered calcium ion into cytosol by endoplasmic reticulum	1	4	0.13848	0.342685	1	0.691081	1
GO:1903969	regulation of response to macrophage colony-stimulating factor	1	4	0.13848	0.342685	1	0.691081	1
GO:1903972	regulation of cellular response to macrophage colony-stimulating factor stimulus	1	4	0.13848	0.342685	1	0.691081	1
GO:1904893	negative regulation of receptor signaling pathway via STAT	1	4	0.13848	0.342685	1	0.691081	1
GO:2000110	negative regulation of macrophage apoptotic process	1	4	0.13848	0.342685	1	0.691081	1
GO:2000510	positive regulation of dendritic cell chemotaxis	1	4	0.13848	0.342685	1	1	1
GO:2000562	negative regulation of CD4-positive, alpha-beta T cell proliferation	1	4	0.13848	0.342685	1	0.691081	1
GO:2001187	positive regulation of CD8-positive, alpha-beta T cell activation	1	4	0.13848	0.342685	1	0.691081	1
GO:2001256	regulation of store-operated calcium entry	1	4	0.13848	0.342685	1	0.691081	1
GO:1903530	regulation of secretion by cell	6	98	0.13991	0.345815	1	1	1
GO:0051716	cellular response to stimulus	34	840	0.14012	0.345926	1	1	1
GO:2000379	positive regulation of reactive oxygen species metabolic process	3	36	0.1405	0.346456	1	1	1
GO:0019722	calcium-mediated signaling	4	56	0.14298	0.35097	1	1	1
GO:0070588	calcium ion transmembrane transport	4	56	0.14298	0.35097	1	1	1
GO:0002460	adaptive immune response based on somatic recombination of immune receptors built from immunoglobulin superfamily domains	7	121	0.143	0.35097	1	1	1
GO:0051251	positive regulation of lymphocyte activation	7	121	0.143	0.35097	1	0.812074	1
GO:0046903	secretion	8	144	0.14332	0.351344	1	1	1
GO:0050728	negative regulation of inflammatory response	3	37	0.14917	0.365257	1	0.901085	1
GO:0002718	regulation of cytokine production involved in immune response	4	57	0.14985	0.366067	1	0.86957	1
GO:0010721	negative regulation of cell development	4	57	0.14985	0.366067	1	1	1
GO:0019080	viral gene expression	2	19	0.15063	0.36669	1	1	1
GO:0032720	negative regulation of tumor necrosis factor production	2	19	0.15063	0.36669	1	0.730465	1
GO:0097028	dendritic cell differentiation	2	19	0.15063	0.36669	1	0.730465	1
GO:0048518	positive regulation of biological process	32	784	0.15298	0.371979	1	1	1
GO:0030217	T cell differentiation	6	101	0.15532	0.377231	1	1	1
GO:0080134	regulation of response to stress	15	319	0.15631	0.379196	1	1	1
GO:0002377	immunoglobulin production	3	38	0.15802	0.382902	1	1	1
GO:0001782	B cell homeostasis	2	20	0.16365	0.383298	1	0.730465	1
GO:0010469	regulation of signaling receptor activity	2	20	0.16365	0.383298	1	0.730465	1
GO:0050688	regulation of defense response to virus	2	20	0.16365	0.383298	1	0.730465	1
GO:0070232	regulation of T cell apoptotic process	2	20	0.16365	0.383298	1	0.730465	1
GO:0140374	antiviral innate immune response	2	20	0.16365	0.383298	1	0.730465	1
GO:1903036	positive regulation of response to wounding	2	20	0.16365	0.383298	1	0.730465	1
GO:1903556	negative regulation of tumor necrosis factor superfamily cytokine production	2	20	0.16365	0.383298	1	0.730465	1
GO:0051235	maintenance of location	4	59	0.16398	0.383298	1	1	1
GO:0009653	anatomical structure morphogenesis	16	348	0.16698	0.383298	1	1	1
GO:0051641	cellular localization	16	348	0.16698	0.383298	1	1	1
GO:0001660	fever generation	1	5	0.17007	0.383298	1	0.730465	1
GO:0001796	regulation of type IIa hypersensitivity	1	5	0.17007	0.383298	1	0.730465	1
GO:0001798	positive regulation of type IIa hypersensitivity	1	5	0.17007	0.383298	1	0.730465	1
GO:0001820	serotonin secretion	1	5	0.17007	0.383298	1	1	1
GO:0002282	microglial cell activation involved in immune response	1	5	0.17007	0.383298	1	0.730465	1
GO:0002318	myeloid progenitor cell differentiation	1	5	0.17007	0.383298	1	0.730465	1
GO:0002551	mast cell chemotaxis	1	5	0.17007	0.383298	1	0.730465	1
GO:0002666	positive regulation of T cell tolerance induction	1	5	0.17007	0.383298	1	0.730465	1
GO:0002862	negative regulation of inflammatory response to antigenic stimulus	1	5	0.17007	0.383298	1	1	1
GO:0002892	regulation of type II hypersensitivity	1	5	0.17007	0.383298	1	0.730465	1
GO:0002894	positive regulation of type II hypersensitivity	1	5	0.17007	0.383298	1	0.730465	1
GO:0006022	aminoglycan metabolic process	1	5	0.17007	0.383298	1	0.730465	1
GO:0006907	pinocytosis	1	5	0.17007	0.383298	1	0.730465	1
GO:0007218	neuropeptide signaling pathway	1	5	0.17007	0.383298	1	0.730465	1
GO:0008053	mitochondrial fusion	1	5	0.17007	0.383298	1	0.730465	1
GO:0016045	detection of bacterium	1	5	0.17007	0.383298	1	0.730465	1
GO:0030203	glycosaminoglycan metabolic process	1	5	0.17007	0.383298	1	0.730465	1
GO:0030220	platelet formation	1	5	0.17007	0.383298	1	0.730465	1
GO:0030837	negative regulation of actin filament polymerization	1	5	0.17007	0.383298	1	0.730465	1
GO:0031649	heat generation	1	5	0.17007	0.383298	1	0.730465	1
GO:0031666	positive regulation of lipopolysaccharide-mediated signaling pathway	1	5	0.17007	0.383298	1	0.730465	1
GO:0033031	positive regulation of neutrophil apoptotic process	1	5	0.17007	0.383298	1	0.730465	1
GO:0034145	positive regulation of toll-like receptor 4 signaling pathway	1	5	0.17007	0.383298	1	0.730465	1
GO:0035022	positive regulation of Rac protein signal transduction	1	5	0.17007	0.383298	1	0.730465	1
GO:0035701	hematopoietic stem cell migration	1	5	0.17007	0.383298	1	0.730465	1
GO:0035740	CD8-positive, alpha-beta T cell proliferation	1	5	0.17007	0.383298	1	0.730465	1
GO:0036120	cellular response to platelet-derived growth factor stimulus	1	5	0.17007	0.383298	1	0.730465	1
GO:0036314	response to sterol	1	5	0.17007	0.383298	1	0.730465	1
GO:0036344	platelet morphogenesis	1	5	0.17007	0.383298	1	0.730465	1
GO:0043117	positive regulation of vascular permeability	1	5	0.17007	0.383298	1	0.730465	1
GO:0043374	CD8-positive, alpha-beta T cell differentiation	1	5	0.17007	0.383298	1	0.730465	1
GO:0046007	negative regulation of activated T cell proliferation	1	5	0.17007	0.383298	1	0.730465	1
GO:0051712	positive regulation of killing of cells of another organism	1	5	0.17007	0.383298	1	0.730465	1
GO:0060033	anatomical structure regression	1	5	0.17007	0.383298	1	0.730465	1
GO:0060191	regulation of lipase activity	1	5	0.17007	0.383298	1	1	1
GO:0061437	renal system vasculature development	1	5	0.17007	0.383298	1	0.730465	1
GO:0061440	kidney vasculature development	1	5	0.17007	0.383298	1	0.730465	1
GO:0070723	response to cholesterol	1	5	0.17007	0.383298	1	0.730465	1
GO:0071318	cellular response to ATP	1	5	0.17007	0.383298	1	0.730465	1
GO:0071838	cell proliferation in bone marrow	1	5	0.17007	0.383298	1	1	1
GO:0072012	glomerulus vasculature development	1	5	0.17007	0.383298	1	0.730465	1
GO:0072109	glomerular mesangium development	1	5	0.17007	0.383298	1	0.730465	1
GO:1900016	negative regulation of cytokine production involved in inflammatory response	1	5	0.17007	0.383298	1	0.730465	1
GO:1901223	negative regulation of non-canonical NF-kappaB signal transduction	1	5	0.17007	0.383298	1	0.730465	1
GO:1901724	positive regulation of cell proliferation involved in kidney development	1	5	0.17007	0.383298	1	0.730465	1
GO:1902166	negative regulation of intrinsic apoptotic signaling pathway in response to DNA damage by p53 class mediator	1	5	0.17007	0.383298	1	0.730465	1
GO:1902683	regulation of receptor localization to synapse	1	5	0.17007	0.383298	1	1	1
GO:1903510	mucopolysaccharide metabolic process	1	5	0.17007	0.383298	1	0.730465	1
GO:1904177	regulation of adipose tissue development	1	5	0.17007	0.383298	1	0.730465	1
GO:2000008	regulation of protein localization to cell surface	1	5	0.17007	0.383298	1	0.730465	1
GO:2000010	positive regulation of protein localization to cell surface	1	5	0.17007	0.383298	1	0.730465	1
GO:2000310	regulation of NMDA receptor activity	1	5	0.17007	0.383298	1	0.730465	1
GO:2000427	positive regulation of apoptotic cell clearance	1	5	0.17007	0.383298	1	0.730465	1
GO:2000508	regulation of dendritic cell chemotaxis	1	5	0.17007	0.383298	1	1	1
GO:2001188	regulation of T cell activation via T cell receptor contact with antigen bound to MHC molecule on antigen presenting cell	1	5	0.17007	0.383298	1	0.730465	1
GO:0045580	regulation of T cell differentiation	4	60	0.17122	0.385061	1	1	1
GO:0050729	positive regulation of inflammatory response	4	60	0.17122	0.385061	1	0.7339	1
GO:0009967	positive regulation of signal transduction	15	325	0.17617	0.391452	1	1	1
GO:0032481	positive regulation of type I interferon production	3	40	0.1762	0.391452	1	0.741439	1
GO:0042100	B cell proliferation	3	40	0.1762	0.391452	1	1	1
GO:1903034	regulation of response to wounding	3	40	0.1762	0.391452	1	0.741439	1
GO:0008360	regulation of cell shape	2	21	0.17687	0.391452	1	0.741439	1
GO:0019233	sensory perception of pain	2	21	0.17687	0.391452	1	0.741439	1
GO:0034109	homotypic cell-cell adhesion	2	21	0.17687	0.391452	1	0.741439	1
GO:0046640	regulation of alpha-beta T cell proliferation	2	21	0.17687	0.391452	1	0.741439	1
GO:0050853	B cell receptor signaling pathway	2	21	0.17687	0.391452	1	0.741439	1
GO:0071466	cellular response to xenobiotic stimulus	2	21	0.17687	0.391452	1	0.741439	1
GO:1900015	regulation of cytokine production involved in inflammatory response	2	21	0.17687	0.391452	1	0.741439	1
GO:1904892	regulation of receptor signaling pathway via STAT	2	21	0.17687	0.391452	1	0.741439	1
GO:0002449	lymphocyte mediated immunity	6	105	0.17705	0.391452	1	1	1
GO:0022409	positive regulation of cell-cell adhesion	6	105	0.17705	0.391452	1	0.950167	1
GO:0048872	homeostasis of number of cells	6	105	0.17705	0.391452	1	0.923036	1
GO:0051046	regulation of secretion	6	105	0.17705	0.391452	1	1	1
GO:0048583	regulation of response to stimulus	26	620	0.17733	0.391658	1	1	1
GO:0065007	biological regulation	38	978	0.17937	0.395747	1	1	1
GO:0002696	positive regulation of leukocyte activation	7	129	0.18189	0.400464	1	0.846128	1
GO:0030098	lymphocyte differentiation	7	129	0.18189	0.400464	1	1	1
GO:0051094	positive regulation of developmental process	13	276	0.18324	0.403013	1	0.985605	1
GO:0008284	positive regulation of cell population proliferation	11	226	0.18365	0.403491	1	0.753245	1
GO:0032102	negative regulation of response to external stimulus	5	84	0.18645	0.409214	1	1	1
GO:0007010	cytoskeleton organization	7	130	0.18706	0.40976	1	0.753245	1
GO:0051128	regulation of cellular component organization	16	354	0.18709	0.40976	1	1	1
GO:0002534	cytokine production involved in inflammatory response	2	22	0.19026	0.414099	1	0.753245	1
GO:0045445	myoblast differentiation	2	22	0.19026	0.414099	1	1	1
GO:1905477	positive regulation of protein localization to membrane	2	22	0.19026	0.414099	1	0.753245	1
GO:2000108	positive regulation of leukocyte apoptotic process	2	22	0.19026	0.414099	1	0.753245	1
GO:0051051	negative regulation of transport	5	85	0.19294	0.414099	1	1	1
GO:0051090	regulation of DNA-binding transcription factor activity	5	85	0.19294	0.414099	1	0.753245	1
GO:0051091	positive regulation of DNA-binding transcription factor activity	4	63	0.19364	0.414099	1	0.753245	1
GO:0032649	regulation of type II interferon production	3	42	0.19496	0.414099	1	0.753245	1
GO:0046634	regulation of alpha-beta T cell activation	3	42	0.19496	0.414099	1	0.753245	1
GO:0051092	positive regulation of NF-kappaB transcription factor activity	3	42	0.19496	0.414099	1	0.753245	1
GO:0009891	positive regulation of biosynthetic process	18	409	0.19612	0.414099	1	1	1
GO:0050867	positive regulation of cell activation	7	132	0.19759	0.414099	1	0.867609	1
GO:0033993	response to lipid	10	205	0.19941	0.414099	1	1	1
GO:0001878	response to yeast	1	6	0.20053	0.414099	1	1	1
GO:0002430	complement receptor mediated signaling pathway	1	6	0.20053	0.414099	1	0.753245	1
GO:0002517	T cell tolerance induction	1	6	0.20053	0.414099	1	0.753245	1
GO:0002544	chronic inflammatory response	1	6	0.20053	0.414099	1	0.753245	1
GO:0002645	positive regulation of tolerance induction	1	6	0.20053	0.414099	1	0.753245	1
GO:0002664	regulation of T cell tolerance induction	1	6	0.20053	0.414099	1	0.753245	1
GO:0002866	positive regulation of acute inflammatory response to antigenic stimulus	1	6	0.20053	0.414099	1	0.753245	1
GO:0002885	positive regulation of hypersensitivity	1	6	0.20053	0.414099	1	0.753245	1
GO:0002922	positive regulation of humoral immune response	1	6	0.20053	0.414099	1	0.753245	1
GO:0003159	morphogenesis of an endothelium	1	6	0.20053	0.414099	1	0.753245	1
GO:0006516	glycoprotein catabolic process	1	6	0.20053	0.414099	1	0.753245	1
GO:0006837	serotonin transport	1	6	0.20053	0.414099	1	1	1
GO:0030574	collagen catabolic process	1	6	0.20053	0.414099	1	0.753245	1
GO:0032026	response to magnesium ion	1	6	0.20053	0.414099	1	0.753245	1
GO:0032691	negative regulation of interleukin-1 beta production	1	6	0.20053	0.414099	1	0.753245	1
GO:0032700	negative regulation of interleukin-17 production	1	6	0.20053	0.414099	1	0.753245	1
GO:0034162	toll-like receptor 9 signaling pathway	1	6	0.20053	0.414099	1	0.753245	1
GO:0034351	negative regulation of glial cell apoptotic process	1	6	0.20053	0.414099	1	0.753245	1
GO:0035020	regulation of Rac protein signal transduction	1	6	0.20053	0.414099	1	0.753245	1
GO:0035313	wound healing, spreading of epidermal cells	1	6	0.20053	0.414099	1	0.753245	1
GO:0035821	modulation of process of another organism	1	6	0.20053	0.414099	1	0.753245	1
GO:0036119	response to platelet-derived growth factor	1	6	0.20053	0.414099	1	0.753245	1
GO:0038094	Fc-gamma receptor signaling pathway	1	6	0.20053	0.414099	1	0.753245	1
GO:0043518	negative regulation of DNA damage response, signal transduction by p53 class mediator	1	6	0.20053	0.414099	1	0.753245	1
GO:0044788	modulation by host of viral process	1	6	0.20053	0.414099	1	1	1
GO:0045103	intermediate filament-based process	1	6	0.20053	0.414099	1	0.753245	1
GO:0045104	intermediate filament cytoskeleton organization	1	6	0.20053	0.414099	1	0.753245	1
GO:0045346	regulation of MHC class II biosynthetic process	1	6	0.20053	0.414099	1	1	1
GO:0051709	regulation of killing of cells of another organism	1	6	0.20053	0.414099	1	0.753245	1
GO:0061154	endothelial tube morphogenesis	1	6	0.20053	0.414099	1	0.753245	1
GO:0061450	trophoblast cell migration	1	6	0.20053	0.414099	1	0.753245	1
GO:0070486	leukocyte aggregation	1	6	0.20053	0.414099	1	1	1
GO:0071224	cellular response to peptidoglycan	1	6	0.20053	0.414099	1	0.753245	1
GO:0090314	positive regulation of protein targeting to membrane	1	6	0.20053	0.414099	1	0.753245	1
GO:0097531	mast cell migration	1	6	0.20053	0.414099	1	0.753245	1
GO:0106014	regulation of inflammatory response to wounding	1	6	0.20053	0.414099	1	0.753245	1
GO:1900272	negative regulation of long-term synaptic potentiation	1	6	0.20053	0.414099	1	0.753245	1
GO:1901163	regulation of trophoblast cell migration	1	6	0.20053	0.414099	1	0.753245	1
GO:1901722	regulation of cell proliferation involved in kidney development	1	6	0.20053	0.414099	1	0.753245	1
GO:1901739	regulation of myoblast fusion	1	6	0.20053	0.414099	1	0.753245	1
GO:1901797	negative regulation of signal transduction by p53 class mediator	1	6	0.20053	0.414099	1	0.753245	1
GO:1902165	regulation of intrinsic apoptotic signaling pathway in response to DNA damage by p53 class mediator	1	6	0.20053	0.414099	1	0.753245	1
GO:1902254	negative regulation of intrinsic apoptotic signaling pathway by p53 class mediator	1	6	0.20053	0.414099	1	0.753245	1
GO:1902950	regulation of dendritic spine maintenance	1	6	0.20053	0.414099	1	0.753245	1
GO:1905809	negative regulation of synapse organization	1	6	0.20053	0.414099	1	0.753245	1
GO:0007229	integrin-mediated signaling pathway	2	23	0.20379	0.417949	1	0.757347	1
GO:0010332	response to gamma radiation	2	23	0.20379	0.417949	1	0.757347	1
GO:0010951	negative regulation of endopeptidase activity	2	23	0.20379	0.417949	1	0.757347	1
GO:0035456	response to interferon-beta	2	23	0.20379	0.417949	1	0.757347	1
GO:0050798	activated T cell proliferation	2	23	0.20379	0.417949	1	0.757347	1
GO:0060348	bone development	2	23	0.20379	0.417949	1	1	1
GO:0062208	positive regulation of pattern recognition receptor signaling pathway	2	23	0.20379	0.417949	1	1	1
GO:0009615	response to virus	6	110	0.20592	0.421905	1	1	1
GO:0045597	positive regulation of cell differentiation	10	207	0.20829	0.426112	1	1	1
GO:0019725	cellular homeostasis	7	134	0.20838	0.426112	1	1	1
GO:0034612	response to tumor necrosis factor	4	65	0.2091	0.427167	1	0.774335	1
GO:0019882	antigen processing and presentation	3	44	0.21421	0.43718	1	1	1
GO:0009892	negative regulation of metabolic process	16	362	0.2159	0.440201	1	1	1
GO:0031348	negative regulation of defense response	4	66	0.21697	0.441952	1	0.911559	1
GO:0002758	innate immune response-activating signaling pathway	5	89	0.21969	0.446625	1	1	1
GO:0097191	extrinsic apoptotic signaling pathway	5	89	0.21969	0.446625	1	0.90114	1
GO:1902533	positive regulation of intracellular signal transduction	12	260	0.22035	0.4474	1	0.929138	1
GO:0002708	positive regulation of lymphocyte mediated immunity	3	45	0.224	0.4474	1	0.779355	1
GO:0032609	type II interferon production	3	45	0.224	0.4474	1	0.779355	1
GO:0002246	wound healing involved in inflammatory response	1	7	0.22989	0.4474	1	0.779355	1
GO:0002320	lymphoid progenitor cell differentiation	1	7	0.22989	0.4474	1	0.779355	1
GO:0002732	positive regulation of dendritic cell cytokine production	1	7	0.22989	0.4474	1	0.779355	1
GO:0030219	megakaryocyte differentiation	1	7	0.22989	0.4474	1	0.779355	1
GO:0030851	granulocyte differentiation	1	7	0.22989	0.4474	1	0.779355	1
GO:0031579	membrane raft organization	1	7	0.22989	0.4474	1	0.779355	1
GO:0032288	myelin assembly	1	7	0.22989	0.4474	1	0.779355	1
GO:0032627	interleukin-23 production	1	7	0.22989	0.4474	1	0.779355	1
GO:0032645	regulation of granulocyte macrophage colony-stimulating factor production	1	7	0.22989	0.4474	1	1	1
GO:0032667	regulation of interleukin-23 production	1	7	0.22989	0.4474	1	0.779355	1
GO:0032682	negative regulation of chemokine production	1	7	0.22989	0.4474	1	0.779355	1
GO:0032692	negative regulation of interleukin-1 production	1	7	0.22989	0.4474	1	0.779355	1
GO:0033034	positive regulation of myeloid cell apoptotic process	1	7	0.22989	0.4474	1	0.779355	1
GO:0034112	positive regulation of homotypic cell-cell adhesion	1	7	0.22989	0.4474	1	0.779355	1
GO:0034394	protein localization to cell surface	1	7	0.22989	0.4474	1	0.779355	1
GO:0038093	Fc receptor signaling pathway	1	7	0.22989	0.4474	1	0.779355	1
GO:0045342	MHC class II biosynthetic process	1	7	0.22989	0.4474	1	1	1
GO:0045588	positive regulation of gamma-delta T cell differentiation	1	7	0.22989	0.4474	1	0.779355	1
GO:0045591	positive regulation of regulatory T cell differentiation	1	7	0.22989	0.4474	1	0.779355	1
GO:0045830	positive regulation of isotype switching	1	7	0.22989	0.4474	1	0.779355	1
GO:0046645	positive regulation of gamma-delta T cell activation	1	7	0.22989	0.4474	1	0.779355	1
GO:0050857	positive regulation of antigen receptor-mediated signaling pathway	1	7	0.22989	0.4474	1	0.779355	1
GO:0060099	regulation of phagocytosis, engulfment	1	7	0.22989	0.4474	1	0.779355	1
GO:0060100	positive regulation of phagocytosis, engulfment	1	7	0.22989	0.4474	1	0.779355	1
GO:0060143	positive regulation of syncytium formation by plasma membrane fusion	1	7	0.22989	0.4474	1	0.779355	1
GO:0060263	regulation of respiratory burst	1	7	0.22989	0.4474	1	1	1
GO:0060368	regulation of Fc receptor mediated stimulatory signaling pathway	1	7	0.22989	0.4474	1	0.779355	1
GO:0060512	prostate gland morphogenesis	1	7	0.22989	0.4474	1	0.779355	1
GO:0060740	prostate gland epithelium morphogenesis	1	7	0.22989	0.4474	1	0.779355	1
GO:0070102	interleukin-6-mediated signaling pathway	1	7	0.22989	0.4474	1	0.779355	1
GO:0071526	semaphorin-plexin signaling pathway	1	7	0.22989	0.4474	1	0.779355	1
GO:0071676	negative regulation of mononuclear cell migration	1	7	0.22989	0.4474	1	1	1
GO:0071888	macrophage apoptotic process	1	7	0.22989	0.4474	1	0.779355	1
GO:0072111	cell proliferation involved in kidney development	1	7	0.22989	0.4474	1	0.779355	1
GO:0090313	regulation of protein targeting to membrane	1	7	0.22989	0.4474	1	0.779355	1
GO:1904415	regulation of xenophagy	1	7	0.22989	0.4474	1	0.779355	1
GO:1904417	positive regulation of xenophagy	1	7	0.22989	0.4474	1	0.779355	1
GO:1905153	regulation of membrane invagination	1	7	0.22989	0.4474	1	0.779355	1
GO:1905155	positive regulation of membrane invagination	1	7	0.22989	0.4474	1	0.779355	1
GO:2000109	regulation of macrophage apoptotic process	1	7	0.22989	0.4474	1	0.779355	1
GO:2000343	positive regulation of chemokine (C-X-C motif) ligand 2 production	1	7	0.22989	0.4474	1	0.779355	1
GO:2000425	regulation of apoptotic cell clearance	1	7	0.22989	0.4474	1	0.779355	1
GO:2001185	regulation of CD8-positive, alpha-beta T cell activation	1	7	0.22989	0.4474	1	0.779355	1
GO:0030225	macrophage differentiation	2	25	0.23117	0.448226	1	0.779355	1
GO:0032735	positive regulation of interleukin-12 production	2	25	0.23117	0.448226	1	0.779355	1
GO:0045058	T cell selection	2	25	0.23117	0.448226	1	1	1
GO:0045069	regulation of viral genome replication	2	25	0.23117	0.448226	1	0.779355	1
GO:0046631	alpha-beta T cell activation	4	68	0.23296	0.451279	1	1	1
GO:0032755	positive regulation of interleukin-6 production	3	46	0.23388	0.452226	1	0.781838	1
GO:0042116	macrophage activation	3	46	0.23388	0.452226	1	0.781838	1
GO:0032880	regulation of protein localization	7	140	0.2421	0.467688	1	0.90114	1
GO:0045596	negative regulation of cell differentiation	6	116	0.24279	0.468589	1	1	1
GO:0031324	negative regulation of cellular metabolic process	14	317	0.24387	0.470241	1	1	1
GO:0042267	natural killer cell mediated cytotoxicity	2	26	0.24497	0.471494	1	0.812074	1
GO:0072006	nephron development	2	26	0.24497	0.471494	1	0.812074	1
GO:0042742	defense response to bacterium	4	70	0.24925	0.478968	1	0.812074	1
GO:0010557	positive regulation of macromolecule biosynthetic process	17	397	0.24931	0.478968	1	1	1
GO:0018193	peptidyl-amino acid modification	7	142	0.25376	0.48236	1	1	1
GO:0001959	regulation of cytokine-mediated signaling pathway	3	48	0.25389	0.48236	1	0.970614	1
GO:0002824	positive regulation of adaptive immune response based on somatic recombination of immune receptors built from immunoglobulin superfamily domains	3	48	0.25389	0.48236	1	0.812074	1
GO:0050679	positive regulation of epithelial cell proliferation	3	48	0.25389	0.48236	1	0.812074	1
GO:0001953	negative regulation of cell-matrix adhesion	1	8	0.25821	0.48236	1	1	1
GO:0002327	immature B cell differentiation	1	8	0.25821	0.48236	1	0.812074	1
GO:0002431	Fc receptor mediated stimulatory signaling pathway	1	8	0.25821	0.48236	1	0.812074	1
GO:0002693	positive regulation of cellular extravasation	1	8	0.25821	0.48236	1	0.812074	1
GO:0002755	MyD88-dependent toll-like receptor signaling pathway	1	8	0.25821	0.48236	1	0.812074	1
GO:0014004	microglia differentiation	1	8	0.25821	0.48236	1	0.812074	1
GO:0032272	negative regulation of protein polymerization	1	8	0.25821	0.48236	1	0.812074	1
GO:0032874	positive regulation of stress-activated MAPK cascade	1	8	0.25821	0.48236	1	0.812074	1
GO:0034121	regulation of toll-like receptor signaling pathway	1	8	0.25821	0.48236	1	1	1
GO:0034350	regulation of glial cell apoptotic process	1	8	0.25821	0.48236	1	0.812074	1
GO:0035771	interleukin-4-mediated signaling pathway	1	8	0.25821	0.48236	1	1	1
GO:0043407	negative regulation of MAP kinase activity	1	8	0.25821	0.48236	1	0.812074	1
GO:0045191	regulation of isotype switching	1	8	0.25821	0.48236	1	0.812074	1
GO:0045586	regulation of gamma-delta T cell differentiation	1	8	0.25821	0.48236	1	0.812074	1
GO:0045745	positive regulation of G protein-coupled receptor signaling pathway	1	8	0.25821	0.48236	1	0.812074	1
GO:0046643	regulation of gamma-delta T cell activation	1	8	0.25821	0.48236	1	0.812074	1
GO:0050922	negative regulation of chemotaxis	1	8	0.25821	0.48236	1	1	1
GO:0051281	positive regulation of release of sequestered calcium ion into cytosol	1	8	0.25821	0.48236	1	0.812074	1
GO:0060339	negative regulation of type I interferon-mediated signaling pathway	1	8	0.25821	0.48236	1	0.812074	1
GO:0070304	positive regulation of stress-activated protein kinase signaling cascade	1	8	0.25821	0.48236	1	0.812074	1
GO:0070306	lens fiber cell differentiation	1	8	0.25821	0.48236	1	0.812074	1
GO:0071549	cellular response to dexamethasone stimulus	1	8	0.25821	0.48236	1	0.812074	1
GO:0098792	xenophagy	1	8	0.25821	0.48236	1	0.812074	1
GO:1901889	negative regulation of cell junction assembly	1	8	0.25821	0.48236	1	0.812074	1
GO:1903429	regulation of cell maturation	1	8	0.25821	0.48236	1	0.812074	1
GO:2000316	regulation of T-helper 17 type immune response	1	8	0.25821	0.48236	1	0.812074	1
GO:2000318	positive regulation of T-helper 17 type immune response	1	8	0.25821	0.48236	1	0.812074	1
GO:0002228	natural killer cell mediated immunity	2	27	0.25881	0.482621	1	0.812074	1
GO:2000045	regulation of G1/S transition of mitotic cell cycle	2	27	0.25881	0.482621	1	0.812074	1
GO:0045785	positive regulation of cell adhesion	7	143	0.25966	0.483775	1	1	1
GO:0002218	activation of innate immune response	5	96	0.26917	0.501048	1	1	1
GO:0009968	negative regulation of signal transduction	10	220	0.27018	0.502211	1	1	1
GO:0010466	negative regulation of peptidase activity	2	28	0.27267	0.502211	1	0.826089	1
GO:0022612	gland morphogenesis	2	28	0.27267	0.502211	1	0.826089	1
GO:0031623	receptor internalization	2	28	0.27267	0.502211	1	0.826089	1
GO:0032729	positive regulation of type II interferon production	2	28	0.27267	0.502211	1	0.826089	1
GO:0034142	toll-like receptor 4 signaling pathway	2	28	0.27267	0.502211	1	0.826089	1
GO:0045824	negative regulation of innate immune response	2	28	0.27267	0.502211	1	0.826089	1
GO:0050830	defense response to Gram-positive bacterium	2	28	0.27267	0.502211	1	0.826089	1
GO:0061041	regulation of wound healing	2	28	0.27267	0.502211	1	0.826089	1
GO:0070231	T cell apoptotic process	2	28	0.27267	0.502211	1	0.826089	1
GO:1903531	negative regulation of secretion by cell	2	28	0.27267	0.502211	1	1	1
GO:2001238	positive regulation of extrinsic apoptotic signaling pathway	2	28	0.27267	0.502211	1	1	1
GO:0051897	positive regulation of phosphatidylinositol 3-kinase/protein kinase B signal transduction	3	50	0.27417	0.504531	1	0.826089	1
GO:0000902	cell morphogenesis	6	121	0.27504	0.505244	1	0.911559	1
GO:0044092	negative regulation of molecular function	6	121	0.27504	0.505244	1	0.826089	1
GO:0048878	chemical homeostasis	7	146	0.27762	0.507664	1	1	1
GO:0031328	positive regulation of cellular biosynthetic process	17	405	0.28181	0.507664	1	1	1
GO:0016032	viral process	4	74	0.2826	0.507664	1	1	1
GO:0034220	monoatomic ion transmembrane transport	5	98	0.2838	0.507664	1	1	1
GO:0001916	positive regulation of T cell mediated cytotoxicity	1	9	0.2855	0.507664	1	0.826089	1
GO:0002643	regulation of tolerance induction	1	9	0.2855	0.507664	1	0.826089	1
GO:0002863	positive regulation of inflammatory response to antigenic stimulus	1	9	0.2855	0.507664	1	0.826089	1
GO:0006612	protein targeting to membrane	1	9	0.2855	0.507664	1	0.826089	1
GO:0016601	Rac protein signal transduction	1	9	0.2855	0.507664	1	0.826089	1
GO:0031952	regulation of protein autophosphorylation	1	9	0.2855	0.507664	1	0.826089	1
GO:0032495	response to muramyl dipeptide	1	9	0.2855	0.507664	1	0.826089	1
GO:0032634	interleukin-5 production	1	9	0.2855	0.507664	1	0.826089	1
GO:0032674	regulation of interleukin-5 production	1	9	0.2855	0.507664	1	0.826089	1
GO:0032695	negative regulation of interleukin-12 production	1	9	0.2855	0.507664	1	0.826089	1
GO:0034143	regulation of toll-like receptor 4 signaling pathway	1	9	0.2855	0.507664	1	0.826089	1
GO:0036037	CD8-positive, alpha-beta T cell activation	1	9	0.2855	0.507664	1	0.826089	1
GO:0042492	gamma-delta T cell differentiation	1	9	0.2855	0.507664	1	0.826089	1
GO:0043011	myeloid dendritic cell differentiation	1	9	0.2855	0.507664	1	0.826089	1
GO:0043114	regulation of vascular permeability	1	9	0.2855	0.507664	1	0.826089	1
GO:0051602	response to electrical stimulus	1	9	0.2855	0.507664	1	0.826089	1
GO:0060340	positive regulation of type I interferon-mediated signaling pathway	1	9	0.2855	0.507664	1	0.826089	1
GO:0060443	mammary gland morphogenesis	1	9	0.2855	0.507664	1	0.826089	1
GO:0060561	apoptotic process involved in morphogenesis	1	9	0.2855	0.507664	1	0.826089	1
GO:0071168	protein localization to chromatin	1	9	0.2855	0.507664	1	1	1
GO:0071300	cellular response to retinoic acid	1	9	0.2855	0.507664	1	0.826089	1
GO:0097062	dendritic spine maintenance	1	9	0.2855	0.507664	1	0.826089	1
GO:0099601	regulation of neurotransmitter receptor activity	1	9	0.2855	0.507664	1	0.826089	1
GO:1900181	negative regulation of protein localization to nucleus	1	9	0.2855	0.507664	1	0.826089	1
GO:1902230	negative regulation of intrinsic apoptotic signaling pathway in response to DNA damage	1	9	0.2855	0.507664	1	0.826089	1
GO:1902253	regulation of intrinsic apoptotic signaling pathway by p53 class mediator	1	9	0.2855	0.507664	1	0.826089	1
GO:1903975	regulation of glial cell migration	1	9	0.2855	0.507664	1	0.826089	1
GO:1904996	positive regulation of leukocyte adhesion to vascular endothelial cell	1	9	0.2855	0.507664	1	0.826089	1
GO:2000273	positive regulation of signaling receptor activity	1	9	0.2855	0.507664	1	0.826089	1
GO:2000353	positive regulation of endothelial cell apoptotic process	1	9	0.2855	0.507664	1	0.826089	1
GO:2000561	regulation of CD4-positive, alpha-beta T cell proliferation	1	9	0.2855	0.507664	1	0.826089	1
GO:0002224	toll-like receptor signaling pathway	2	29	0.28653	0.507664	1	1	1
GO:0034767	positive regulation of monoatomic ion transmembrane transport	2	29	0.28653	0.507664	1	0.826089	1
GO:0051606	detection of stimulus	2	29	0.28653	0.507664	1	1	1
GO:0060760	positive regulation of response to cytokine stimulus	2	29	0.28653	0.507664	1	0.826089	1
GO:0071347	cellular response to interleukin-1	2	29	0.28653	0.507664	1	0.826089	1
GO:1902806	regulation of cell cycle G1/S phase transition	2	29	0.28653	0.507664	1	0.826089	1
GO:1902893	regulation of miRNA transcription	2	29	0.28653	0.507664	1	0.826089	1
GO:0051248	negative regulation of protein metabolic process	6	123	0.28827	0.510316	1	1	1
GO:0060341	regulation of cellular localization	7	148	0.2898	0.512591	1	0.911559	1
GO:0030154	cell differentiation	21	515	0.29258	0.516637	1	1	1
GO:0048869	cellular developmental process	21	515	0.29258	0.516637	1	1	1
GO:0001933	negative regulation of protein phosphorylation	3	52	0.29463	0.519819	1	1	1
GO:0001774	microglial cell activation	2	30	0.30038	0.527742	1	0.846128	1
GO:0031503	protein-containing complex localization	2	30	0.30038	0.527742	1	1	1
GO:0046635	positive regulation of alpha-beta T cell activation	2	30	0.30038	0.527742	1	0.846128	1
GO:0051048	negative regulation of secretion	2	30	0.30038	0.527742	1	1	1
GO:0061614	miRNA transcription	2	30	0.30038	0.527742	1	0.846128	1
GO:1902532	negative regulation of intracellular signal transduction	6	125	0.30165	0.52953	1	1	1
GO:0048519	negative regulation of biological process	25	627	0.30382	0.531794	1	1	1
GO:0045621	positive regulation of lymphocyte differentiation	3	53	0.30492	0.531794	1	0.846128	1
GO:0061024	membrane organization	5	101	0.30608	0.531794	1	1	1
GO:0141124	intracellular signaling cassette	15	358	0.3079	0.531794	1	1	1
GO:0048585	negative regulation of response to stimulus	12	280	0.3118	0.531794	1	1	1
GO:0001779	natural killer cell differentiation	1	10	0.31182	0.531794	1	0.846128	1
GO:0002468	dendritic cell antigen processing and presentation	1	10	0.31182	0.531794	1	0.846128	1
GO:0006397	mRNA processing	1	10	0.31182	0.531794	1	0.846128	1
GO:0010812	negative regulation of cell-substrate adhesion	1	10	0.31182	0.531794	1	1	1
GO:0014823	response to activity	1	10	0.31182	0.531794	1	0.846128	1
GO:0031294	lymphocyte costimulation	1	10	0.31182	0.531794	1	1	1
GO:0031295	T cell costimulation	1	10	0.31182	0.531794	1	1	1
GO:0032490	detection of molecule of bacterial origin	1	10	0.31182	0.531794	1	0.846128	1
GO:0032494	response to peptidoglycan	1	10	0.31182	0.531794	1	0.846128	1
GO:0032570	response to progesterone	1	10	0.31182	0.531794	1	0.846128	1
GO:0043302	positive regulation of leukocyte degranulation	1	10	0.31182	0.531794	1	0.846128	1
GO:0043304	regulation of mast cell degranulation	1	10	0.31182	0.531794	1	0.846128	1
GO:0045579	positive regulation of B cell differentiation	1	10	0.31182	0.531794	1	0.846128	1
GO:0045744	negative regulation of G protein-coupled receptor signaling pathway	1	10	0.31182	0.531794	1	0.846128	1
GO:0046629	gamma-delta T cell activation	1	10	0.31182	0.531794	1	0.846128	1
GO:0048714	positive regulation of oligodendrocyte differentiation	1	10	0.31182	0.531794	1	0.846128	1
GO:0060612	adipose tissue development	1	10	0.31182	0.531794	1	0.846128	1
GO:0070233	negative regulation of T cell apoptotic process	1	10	0.31182	0.531794	1	0.846128	1
GO:0070234	positive regulation of T cell apoptotic process	1	10	0.31182	0.531794	1	0.846128	1
GO:0071385	cellular response to glucocorticoid stimulus	1	10	0.31182	0.531794	1	0.846128	1
GO:0071624	positive regulation of granulocyte chemotaxis	1	10	0.31182	0.531794	1	0.846128	1
GO:0072567	chemokine (C-X-C motif) ligand 2 production	1	10	0.31182	0.531794	1	0.846128	1
GO:0090023	positive regulation of neutrophil chemotaxis	1	10	0.31182	0.531794	1	0.846128	1
GO:0097398	cellular response to interleukin-17	1	10	0.31182	0.531794	1	0.846128	1
GO:1901532	regulation of hematopoietic progenitor cell differentiation	1	10	0.31182	0.531794	1	0.846128	1
GO:1902235	regulation of endoplasmic reticulum stress-induced intrinsic apoptotic signaling pathway	1	10	0.31182	0.531794	1	0.846128	1
GO:1903078	positive regulation of protein localization to plasma membrane	1	10	0.31182	0.531794	1	0.846128	1
GO:1905562	regulation of vascular endothelial cell proliferation	1	10	0.31182	0.531794	1	0.846128	1
GO:2000341	regulation of chemokine (C-X-C motif) ligand 2 production	1	10	0.31182	0.531794	1	0.846128	1
GO:2000648	positive regulation of stem cell proliferation	1	10	0.31182	0.531794	1	0.846128	1
GO:0042063	gliogenesis	5	102	0.31358	0.534098	1	1	1
GO:0002269	leukocyte activation involved in inflammatory response	2	31	0.31419	0.534098	1	0.85083	1
GO:0033077	T cell differentiation in thymus	2	31	0.31419	0.534098	1	1	1
GO:1903828	negative regulation of protein localization	2	31	0.31419	0.534098	1	1	1
GO:0001501	skeletal system development	3	54	0.31523	0.534998	1	1	1
GO:0042326	negative regulation of phosphorylation	3	54	0.31523	0.534998	1	1	1
GO:0098662	inorganic cation transmembrane transport	4	79	0.32529	0.55119	1	1	1
GO:0002702	positive regulation of production of molecular mediator of immune response	3	55	0.32556	0.55119	1	0.87361	1
GO:0019058	viral life cycle	3	55	0.32556	0.55119	1	1	1
GO:0042592	homeostatic process	12	283	0.32653	0.552387	1	1	1
GO:0050794	regulation of cellular process	36	943	0.32717	0.552559	1	1	1
GO:0010648	negative regulation of cell communication	10	231	0.32717	0.552559	1	1	1
GO:0014015	positive regulation of gliogenesis	2	32	0.32795	0.552559	1	0.87361	1
GO:0014902	myotube differentiation	2	32	0.32795	0.552559	1	0.87361	1
GO:2000628	regulation of miRNA metabolic process	2	32	0.32795	0.552559	1	0.87361	1
GO:0044403	biological process involved in symbiotic interaction	3	56	0.33589	0.556496	1	1	1
GO:2001236	regulation of extrinsic apoptotic signaling pathway	3	56	0.33589	0.556496	1	1	1
GO:0002686	negative regulation of leukocyte migration	1	11	0.33719	0.556496	1	1	1
GO:0006094	gluconeogenesis	1	11	0.33719	0.556496	1	0.87361	1
GO:0006691	leukotriene metabolic process	1	11	0.33719	0.556496	1	0.87361	1
GO:0006956	complement activation	1	11	0.33719	0.556496	1	0.87361	1
GO:0008380	RNA splicing	1	11	0.33719	0.556496	1	0.87361	1
GO:0019319	hexose biosynthetic process	1	11	0.33719	0.556496	1	0.87361	1
GO:0032835	glomerulus development	1	11	0.33719	0.556496	1	0.87361	1
GO:0034349	glial cell apoptotic process	1	11	0.33719	0.556496	1	0.87361	1
GO:0043516	regulation of DNA damage response, signal transduction by p53 class mediator	1	11	0.33719	0.556496	1	0.87361	1
GO:0046364	monosaccharide biosynthetic process	1	11	0.33719	0.556496	1	0.87361	1
GO:0048010	vascular endothelial growth factor receptor signaling pathway	1	11	0.33719	0.556496	1	0.87361	1
GO:0048286	lung alveolus development	1	11	0.33719	0.556496	1	0.87361	1
GO:0048864	stem cell development	1	11	0.33719	0.556496	1	0.87361	1
GO:0060252	positive regulation of glial cell proliferation	1	11	0.33719	0.556496	1	0.87361	1
GO:0070884	regulation of calcineurin-NFAT signaling cascade	1	11	0.33719	0.556496	1	0.87361	1
GO:0071384	cellular response to corticosteroid stimulus	1	11	0.33719	0.556496	1	0.87361	1
GO:0090022	regulation of neutrophil chemotaxis	1	11	0.33719	0.556496	1	0.87361	1
GO:0101023	vascular endothelial cell proliferation	1	11	0.33719	0.556496	1	0.87361	1
GO:0106056	regulation of calcineurin-mediated signaling	1	11	0.33719	0.556496	1	0.87361	1
GO:1900745	positive regulation of p38MAPK cascade	1	11	0.33719	0.556496	1	0.87361	1
GO:1902742	apoptotic process involved in development	1	11	0.33719	0.556496	1	0.87361	1
GO:1902743	regulation of lamellipodium organization	1	11	0.33719	0.556496	1	0.87361	1
GO:1904377	positive regulation of protein localization to cell periphery	1	11	0.33719	0.556496	1	0.87361	1
GO:1905898	positive regulation of response to endoplasmic reticulum stress	1	11	0.33719	0.556496	1	0.87361	1
GO:0023057	negative regulation of signaling	10	233	0.33787	0.55718	1	1	1
GO:0032655	regulation of interleukin-12 production	2	33	0.34165	0.562528	1	0.884072	1
GO:0048525	negative regulation of viral process	2	33	0.34165	0.562528	1	1	1
GO:0050678	regulation of epithelial cell proliferation	4	82	0.35122	0.577378	1	0.889693	1
GO:0098660	inorganic ion transmembrane transport	4	82	0.35122	0.577378	1	1	1
GO:0002532	production of molecular mediator involved in inflammatory response	2	34	0.35527	0.579525	1	0.889693	1
GO:0002709	regulation of T cell mediated immunity	2	34	0.35527	0.579525	1	0.889693	1
GO:0002832	negative regulation of response to biotic stimulus	2	34	0.35527	0.579525	1	0.889693	1
GO:0007565	female pregnancy	2	34	0.35527	0.579525	1	0.889693	1
GO:0010586	miRNA metabolic process	2	34	0.35527	0.579525	1	0.889693	1
GO:0032615	interleukin-12 production	2	34	0.35527	0.579525	1	0.889693	1
GO:0051346	negative regulation of hydrolase activity	2	34	0.35527	0.579525	1	0.889693	1
GO:0061900	glial cell activation	2	34	0.35527	0.579525	1	0.889693	1
GO:1901136	carbohydrate derivative catabolic process	2	34	0.35527	0.579525	1	0.889693	1
GO:0034765	regulation of monoatomic ion transmembrane transport	3	58	0.35656	0.579525	1	0.889693	1
GO:2000377	regulation of reactive oxygen species metabolic process	3	58	0.35656	0.579525	1	1	1
GO:0001911	negative regulation of leukocyte mediated cytotoxicity	1	12	0.36165	0.579525	1	0.889693	1
GO:0001914	regulation of T cell mediated cytotoxicity	1	12	0.36165	0.579525	1	0.889693	1
GO:0001937	negative regulation of endothelial cell proliferation	1	12	0.36165	0.579525	1	0.889693	1
GO:0002230	positive regulation of defense response to virus by host	1	12	0.36165	0.579525	1	0.889693	1
GO:0002347	response to tumor cell	1	12	0.36165	0.579525	1	0.889693	1
GO:0002691	regulation of cellular extravasation	1	12	0.36165	0.579525	1	0.889693	1
GO:0010575	positive regulation of vascular endothelial growth factor production	1	12	0.36165	0.579525	1	0.889693	1
GO:0022010	central nervous system myelination	1	12	0.36165	0.579525	1	0.889693	1
GO:0032291	axon ensheathment in central nervous system	1	12	0.36165	0.579525	1	0.889693	1
GO:0032414	positive regulation of ion transmembrane transporter activity	1	12	0.36165	0.579525	1	0.889693	1
GO:0033198	response to ATP	1	12	0.36165	0.579525	1	0.889693	1
GO:0035914	skeletal muscle cell differentiation	1	12	0.36165	0.579525	1	0.889693	1
GO:0045730	respiratory burst	1	12	0.36165	0.579525	1	1	1
GO:0097120	receptor localization to synapse	1	12	0.36165	0.579525	1	1	1
GO:0097396	response to interleukin-17	1	12	0.36165	0.579525	1	0.889693	1
GO:1902807	negative regulation of cell cycle G1/S phase transition	1	12	0.36165	0.579525	1	0.889693	1
GO:1903307	positive regulation of regulated secretory pathway	1	12	0.36165	0.579525	1	0.889693	1
GO:1903533	regulation of protein targeting	1	12	0.36165	0.579525	1	0.889693	1
GO:1904994	regulation of leukocyte adhesion to vascular endothelial cell	1	12	0.36165	0.579525	1	0.889693	1
GO:2000134	negative regulation of G1/S transition of mitotic cell cycle	1	12	0.36165	0.579525	1	0.889693	1
GO:2000515	negative regulation of CD4-positive, alpha-beta T cell activation	1	12	0.36165	0.579525	1	0.889693	1
GO:2000573	positive regulation of DNA biosynthetic process	1	12	0.36165	0.579525	1	0.889693	1
GO:0097305	response to alcohol	3	59	0.36687	0.586498	1	0.898843	1
GO:0098655	monoatomic cation transmembrane transport	4	84	0.36856	0.586498	1	1	1
GO:0001936	regulation of endothelial cell proliferation	2	35	0.3688	0.586498	1	0.898843	1
GO:0016071	mRNA metabolic process	2	35	0.3688	0.586498	1	0.898843	1
GO:0030198	extracellular matrix organization	2	35	0.3688	0.586498	1	0.898843	1
GO:0043062	extracellular structure organization	2	35	0.3688	0.586498	1	0.898843	1
GO:0044703	multi-organism reproductive process	2	35	0.3688	0.586498	1	1	1
GO:0044706	multi-multicellular organism process	2	35	0.3688	0.586498	1	1	1
GO:0045229	external encapsulating structure organization	2	35	0.3688	0.586498	1	0.898843	1
GO:1901222	regulation of non-canonical NF-kappaB signal transduction	2	35	0.3688	0.586498	1	0.898843	1
GO:0072359	circulatory system development	9	213	0.37163	0.590551	1	1	1
GO:0002221	pattern recognition receptor signaling pathway	4	85	0.37723	0.598542	1	1	1
GO:0030036	actin cytoskeleton organization	4	85	0.37723	0.598542	1	0.90114	1
GO:0070555	response to interleukin-1	2	36	0.38223	0.600313	1	0.90114	1
GO:0048468	cell development	16	401	0.38322	0.600313	1	1	1
GO:0001658	branching involved in ureteric bud morphogenesis	1	13	0.38522	0.600313	1	0.90114	1
GO:0002281	macrophage activation involved in immune response	1	13	0.38522	0.600313	1	0.90114	1
GO:0007252	I-kappaB phosphorylation	1	13	0.38522	0.600313	1	0.90114	1
GO:0007566	embryo implantation	1	13	0.38522	0.600313	1	0.90114	1
GO:0021549	cerebellum development	1	13	0.38522	0.600313	1	0.90114	1
GO:0030850	prostate gland development	1	13	0.38522	0.600313	1	0.90114	1
GO:0032411	positive regulation of transporter activity	1	13	0.38522	0.600313	1	0.90114	1
GO:0032480	negative regulation of type I interferon production	1	13	0.38522	0.600313	1	0.90114	1
GO:0035019	somatic stem cell population maintenance	1	13	0.38522	0.600313	1	0.90114	1
GO:0042771	intrinsic apoptotic signaling pathway in response to DNA damage by p53 class mediator	1	13	0.38522	0.600313	1	0.90114	1
GO:0043124	negative regulation of canonical NF-kappaB signal transduction	1	13	0.38522	0.600313	1	0.90114	1
GO:0043488	regulation of mRNA stability	1	13	0.38522	0.600313	1	0.90114	1
GO:0045954	positive regulation of natural killer cell mediated cytotoxicity	1	13	0.38522	0.600313	1	0.90114	1
GO:0046636	negative regulation of alpha-beta T cell activation	1	13	0.38522	0.600313	1	0.90114	1
GO:0061013	regulation of mRNA catabolic process	1	13	0.38522	0.600313	1	0.90114	1
GO:0070230	positive regulation of lymphocyte apoptotic process	1	13	0.38522	0.600313	1	0.90114	1
GO:0071634	regulation of transforming growth factor beta production	1	13	0.38522	0.600313	1	0.90114	1
GO:0097242	amyloid-beta clearance	1	13	0.38522	0.600313	1	0.90114	1
GO:1900744	regulation of p38MAPK cascade	1	13	0.38522	0.600313	1	0.90114	1
GO:1901796	regulation of signal transduction by p53 class mediator	1	13	0.38522	0.600313	1	0.90114	1
GO:1902229	regulation of intrinsic apoptotic signaling pathway in response to DNA damage	1	13	0.38522	0.600313	1	0.90114	1
GO:1905330	regulation of morphogenesis of an epithelium	1	13	0.38522	0.600313	1	0.90114	1
GO:1902531	regulation of intracellular signal transduction	14	349	0.39074	0.608463	1	1	1
GO:0000082	G1/S transition of mitotic cell cycle	2	37	0.39555	0.614128	1	0.908504	1
GO:0002260	lymphocyte homeostasis	2	37	0.39555	0.614128	1	0.908504	1
GO:0045471	response to ethanol	2	37	0.39555	0.614128	1	0.908504	1
GO:1905475	regulation of protein localization to membrane	2	37	0.39555	0.614128	1	0.908504	1
GO:0055085	transmembrane transport	6	139	0.39816	0.617678	1	1	1
GO:0043068	positive regulation of programmed cell death	8	192	0.40256	0.617678	1	0.993883	1
GO:0010563	negative regulation of phosphorus metabolic process	3	63	0.40789	0.617678	1	1	1
GO:0045936	negative regulation of phosphate metabolic process	3	63	0.40789	0.617678	1	1	1
GO:0001913	T cell mediated cytotoxicity	1	14	0.40795	0.617678	1	0.908504	1
GO:0002088	lens development in camera-type eye	1	14	0.40795	0.617678	1	0.908504	1
GO:0002204	somatic recombination of immunoglobulin genes involved in immune response	1	14	0.40795	0.617678	1	0.908504	1
GO:0002208	somatic diversification of immunoglobulins involved in immune response	1	14	0.40795	0.617678	1	0.908504	1
GO:0002717	positive regulation of natural killer cell mediated immunity	1	14	0.40795	0.617678	1	0.908504	1
GO:0002724	regulation of T cell cytokine production	1	14	0.40795	0.617678	1	0.908504	1
GO:0010927	cellular component assembly involved in morphogenesis	1	14	0.40795	0.617678	1	0.908504	1
GO:0014003	oligodendrocyte development	1	14	0.40795	0.617678	1	0.908504	1
GO:0019886	antigen processing and presentation of exogenous peptide antigen via MHC class II	1	14	0.40795	0.617678	1	0.908504	1
GO:0031342	negative regulation of cell killing	1	14	0.40795	0.617678	1	0.908504	1
GO:0032816	positive regulation of natural killer cell activation	1	14	0.40795	0.617678	1	0.908504	1
GO:0032989	cellular anatomical entity morphogenesis	1	14	0.40795	0.617678	1	0.908504	1
GO:0043113	receptor clustering	1	14	0.40795	0.617678	1	0.908504	1
GO:0043154	negative regulation of cysteine-type endopeptidase activity involved in apoptotic process	1	14	0.40795	0.617678	1	0.908504	1
GO:0043487	regulation of RNA stability	1	14	0.40795	0.617678	1	0.908504	1
GO:0045190	isotype switching	1	14	0.40795	0.617678	1	0.908504	1
GO:0060135	maternal process involved in female pregnancy	1	14	0.40795	0.617678	1	0.908504	1
GO:0060675	ureteric bud morphogenesis	1	14	0.40795	0.617678	1	0.908504	1
GO:0071404	cellular response to low-density lipoprotein particle stimulus	1	14	0.40795	0.617678	1	0.908504	1
GO:0071548	response to dexamethasone	1	14	0.40795	0.617678	1	0.908504	1
GO:0071604	transforming growth factor beta production	1	14	0.40795	0.617678	1	0.908504	1
GO:0072078	nephron tubule morphogenesis	1	14	0.40795	0.617678	1	0.908504	1
GO:0072171	mesonephric tubule morphogenesis	1	14	0.40795	0.617678	1	0.908504	1
GO:0072538	T-helper 17 type immune response	1	14	0.40795	0.617678	1	0.908504	1
GO:0098876	vesicle-mediated transport to the plasma membrane	1	14	0.40795	0.617678	1	0.908504	1
GO:1900017	positive regulation of cytokine production involved in inflammatory response	1	14	0.40795	0.617678	1	0.908504	1
GO:1902894	negative regulation of miRNA transcription	1	14	0.40795	0.617678	1	0.908504	1
GO:1904894	positive regulation of receptor signaling pathway via STAT	1	14	0.40795	0.617678	1	0.908504	1
GO:2000351	regulation of endothelial cell apoptotic process	1	14	0.40795	0.617678	1	0.908504	1
GO:0007600	sensory perception	2	38	0.40874	0.617678	1	0.908504	1
GO:0050871	positive regulation of B cell activation	2	38	0.40874	0.617678	1	0.908504	1
GO:0061448	connective tissue development	2	38	0.40874	0.617678	1	0.908504	1
GO:1903169	regulation of calcium ion transmembrane transport	2	38	0.40874	0.617678	1	0.908504	1
GO:0009889	regulation of biosynthetic process	22	570	0.4144	0.62578	1	1	1
GO:0007267	cell-cell signaling	7	168	0.41717	0.629463	1	1	1
GO:0051130	positive regulation of cellular component organization	9	221	0.41789	0.629463	1	1	1
GO:0048523	negative regulation of cellular process	23	598	0.41795	0.629463	1	1	1
GO:0001558	regulation of cell growth	3	64	0.41804	0.629463	1	0.911559	1
GO:0050870	positive regulation of T cell activation	4	90	0.42047	0.632667	1	1	1
GO:0002720	positive regulation of cytokine production involved in immune response	2	39	0.42181	0.633319	1	0.911559	1
GO:0007160	cell-matrix adhesion	2	39	0.42181	0.633319	1	1	1
GO:0044843	cell cycle G1/S phase transition	2	39	0.42181	0.633319	1	0.911559	1
GO:0030029	actin filament-based process	4	91	0.42907	0.633605	1	0.911559	1
GO:0001655	urogenital system development	1	15	0.42986	0.633605	1	0.911559	1
GO:0002448	mast cell mediated immunity	1	15	0.42986	0.633605	1	0.911559	1
GO:0007189	adenylate cyclase-activating G protein-coupled receptor signaling pathway	1	15	0.42986	0.633605	1	0.911559	1
GO:0007200	phospholipase C-activating G protein-coupled receptor signaling pathway	1	15	0.42986	0.633605	1	0.911559	1
GO:0015844	monoamine transport	1	15	0.42986	0.633605	1	1	1
GO:0032689	negative regulation of type II interferon production	1	15	0.42986	0.633605	1	0.911559	1
GO:0032727	positive regulation of interferon-alpha production	1	15	0.42986	0.633605	1	0.911559	1
GO:0032872	regulation of stress-activated MAPK cascade	1	15	0.42986	0.633605	1	0.911559	1
GO:0033173	calcineurin-NFAT signaling cascade	1	15	0.42986	0.633605	1	0.911559	1
GO:0034110	regulation of homotypic cell-cell adhesion	1	15	0.42986	0.633605	1	0.911559	1
GO:0043303	mast cell degranulation	1	15	0.42986	0.633605	1	0.911559	1
GO:0043954	cellular component maintenance	1	15	0.42986	0.633605	1	0.911559	1
GO:0045646	regulation of erythrocyte differentiation	1	15	0.42986	0.633605	1	0.911559	1
GO:0045911	positive regulation of DNA recombination	1	15	0.42986	0.633605	1	0.911559	1
GO:0048169	regulation of long-term neuronal synaptic plasticity	1	15	0.42986	0.633605	1	0.911559	1
GO:0051057	positive regulation of small GTPase mediated signal transduction	1	15	0.42986	0.633605	1	0.911559	1
GO:0051968	positive regulation of synaptic transmission, glutamatergic	1	15	0.42986	0.633605	1	0.911559	1
GO:0055094	response to lipoprotein particle	1	15	0.42986	0.633605	1	0.911559	1
GO:0060338	regulation of type I interferon-mediated signaling pathway	1	15	0.42986	0.633605	1	0.911559	1
GO:0061333	renal tubule morphogenesis	1	15	0.42986	0.633605	1	0.911559	1
GO:0070302	regulation of stress-activated protein kinase signaling cascade	1	15	0.42986	0.633605	1	0.911559	1
GO:0072577	endothelial cell apoptotic process	1	15	0.42986	0.633605	1	0.911559	1
GO:0097581	lamellipodium organization	1	15	0.42986	0.633605	1	0.911559	1
GO:0097720	calcineurin-mediated signaling	1	15	0.42986	0.633605	1	0.911559	1
GO:2000629	negative regulation of miRNA metabolic process	1	15	0.42986	0.633605	1	0.911559	1
GO:0001935	endothelial cell proliferation	2	40	0.43473	0.638986	1	0.914853	1
GO:0007204	positive regulation of cytosolic calcium ion concentration	2	40	0.43473	0.638986	1	0.914853	1
GO:0007596	blood coagulation	2	40	0.43473	0.638986	1	0.914853	1
GO:0150076	neuroinflammatory response	2	40	0.43473	0.638986	1	0.914853	1
GO:1903829	positive regulation of protein localization	4	92	0.43764	0.642749	1	0.917293	1
GO:0051896	regulation of phosphatidylinositol 3-kinase/protein kinase B signal transduction	3	66	0.43821	0.642749	1	0.917571	1
GO:1903532	positive regulation of secretion by cell	3	66	0.43821	0.642749	1	1	1
GO:1901701	cellular response to oxygen-containing compound	10	252	0.4426	0.648734	1	1	1
GO:0010468	regulation of gene expression	21	549	0.44314	0.649072	1	1	1
GO:0007599	hemostasis	2	41	0.44751	0.649213	1	0.9213	1
GO:0014013	regulation of gliogenesis	2	41	0.44751	0.649213	1	0.9213	1
GO:0045861	negative regulation of proteolysis	2	41	0.44751	0.649213	1	0.9213	1
GO:0002495	antigen processing and presentation of peptide antigen via MHC class II	1	16	0.45098	0.649213	1	0.9213	1
GO:0002639	positive regulation of immunoglobulin production	1	16	0.45098	0.649213	1	0.9213	1
GO:0006402	mRNA catabolic process	1	16	0.45098	0.649213	1	0.9213	1
GO:0014002	astrocyte development	1	16	0.45098	0.649213	1	0.9213	1
GO:0016447	somatic recombination of immunoglobulin gene segments	1	16	0.45098	0.649213	1	0.9213	1
GO:0022037	metencephalon development	1	16	0.45098	0.649213	1	0.9213	1
GO:0030330	DNA damage response, signal transduction by p53 class mediator	1	16	0.45098	0.649213	1	0.9213	1
GO:0032526	response to retinoic acid	1	16	0.45098	0.649213	1	0.9213	1
GO:0032607	interferon-alpha production	1	16	0.45098	0.649213	1	0.9213	1
GO:0032647	regulation of interferon-alpha production	1	16	0.45098	0.649213	1	0.9213	1
GO:0032660	regulation of interleukin-17 production	1	16	0.45098	0.649213	1	0.9213	1
GO:0034198	cellular response to amino acid starvation	1	16	0.45098	0.649213	1	0.9213	1
GO:0035455	response to interferon-alpha	1	16	0.45098	0.649213	1	0.9213	1
GO:0046641	positive regulation of alpha-beta T cell proliferation	1	16	0.45098	0.649213	1	0.9213	1
GO:0048713	regulation of oligodendrocyte differentiation	1	16	0.45098	0.649213	1	0.9213	1
GO:0070527	platelet aggregation	1	16	0.45098	0.649213	1	0.9213	1
GO:0072028	nephron morphogenesis	1	16	0.45098	0.649213	1	0.9213	1
GO:0072088	nephron epithelium morphogenesis	1	16	0.45098	0.649213	1	0.9213	1
GO:1903901	negative regulation of viral life cycle	1	16	0.45098	0.649213	1	1	1
GO:1905897	regulation of response to endoplasmic reticulum stress	1	16	0.45098	0.649213	1	0.9213	1
GO:1990928	response to amino acid starvation	1	16	0.45098	0.649213	1	0.9213	1
GO:2000117	negative regulation of cysteine-type endopeptidase activity	1	16	0.45098	0.649213	1	0.9213	1
GO:0031400	negative regulation of protein modification process	3	68	0.45814	0.658616	1	1	1
GO:0072657	protein localization to membrane	3	68	0.45814	0.658616	1	0.930486	1
GO:0021782	glial cell development	2	42	0.46014	0.660132	1	0.93274	1
GO:0050817	coagulation	2	42	0.46014	0.660132	1	0.93274	1
GO:1903900	regulation of viral life cycle	2	42	0.46014	0.660132	1	1	1
GO:0009966	regulation of signal transduction	18	472	0.46386	0.665014	1	1	1
GO:0002520	immune system development	3	69	0.46801	0.665706	1	1	1
GO:0002381	immunoglobulin production involved in immunoglobulin-mediated immune response	1	17	0.47133	0.665706	1	0.938754	1
GO:0002504	antigen processing and presentation of peptide or polysaccharide antigen via MHC class II	1	17	0.47133	0.665706	1	0.938754	1
GO:0008277	regulation of G protein-coupled receptor signaling pathway	1	17	0.47133	0.665706	1	0.938754	1
GO:0010634	positive regulation of epithelial cell migration	1	17	0.47133	0.665706	1	0.938754	1
GO:0016445	somatic diversification of immunoglobulins	1	17	0.47133	0.665706	1	0.938754	1
GO:0030010	establishment of cell polarity	1	17	0.47133	0.665706	1	0.938754	1
GO:0030968	endoplasmic reticulum unfolded protein response	1	17	0.47133	0.665706	1	0.938754	1
GO:0031100	animal organ regeneration	1	17	0.47133	0.665706	1	0.938754	1
GO:0032418	lysosome localization	1	17	0.47133	0.665706	1	0.938754	1
GO:0032620	interleukin-17 production	1	17	0.47133	0.665706	1	0.938754	1
GO:0033273	response to vitamin	1	17	0.47133	0.665706	1	1	1
GO:0034502	protein localization to chromosome	1	17	0.47133	0.665706	1	1	1
GO:0035458	cellular response to interferon-beta	1	17	0.47133	0.665706	1	0.938754	1
GO:0045815	transcription initiation-coupled chromatin remodeling	1	17	0.47133	0.665706	1	0.938754	1
GO:0061756	leukocyte adhesion to vascular endothelial cell	1	17	0.47133	0.665706	1	0.938754	1
GO:0071353	cellular response to interleukin-4	1	17	0.47133	0.665706	1	1	1
GO:0071901	negative regulation of protein serine/threonine kinase activity	1	17	0.47133	0.665706	1	0.938754	1
GO:0140894	endolysosomal toll-like receptor signaling pathway	1	17	0.47133	0.665706	1	0.938754	1
GO:1900271	regulation of long-term synaptic potentiation	1	17	0.47133	0.665706	1	0.938754	1
GO:1990849	vacuolar localization	1	17	0.47133	0.665706	1	0.938754	1
GO:2000278	regulation of DNA biosynthetic process	1	17	0.47133	0.665706	1	0.938754	1
GO:0002456	T cell mediated immunity	2	43	0.47261	0.665719	1	0.938754	1
GO:0034764	positive regulation of transmembrane transport	2	43	0.47261	0.665719	1	0.938754	1
GO:0043405	regulation of MAP kinase activity	2	43	0.47261	0.665719	1	0.938754	1
GO:0062207	regulation of pattern recognition receptor signaling pathway	2	43	0.47261	0.665719	1	1	1
GO:0010556	regulation of macromolecule biosynthetic process	21	556	0.47602	0.670072	1	1	1
GO:0001667	ameboidal-type cell migration	2	44	0.48492	0.680576	1	0.950167	1
GO:0007179	transforming growth factor beta receptor signaling pathway	2	44	0.48492	0.680576	1	0.950167	1
GO:0008630	intrinsic apoptotic signaling pathway in response to DNA damage	2	44	0.48492	0.680576	1	0.950167	1
GO:0050708	regulation of protein secretion	2	44	0.48492	0.680576	1	0.950167	1
GO:0051047	positive regulation of secretion	3	71	0.48753	0.680576	1	1	1
GO:0051129	negative regulation of cellular component organization	5	125	0.48854	0.680576	1	1	1
GO:0001657	ureteric bud development	1	18	0.49095	0.680576	1	0.950167	1
GO:0001823	mesonephros development	1	18	0.49095	0.680576	1	0.950167	1
GO:0002369	T cell cytokine production	1	18	0.49095	0.680576	1	0.950167	1
GO:0030177	positive regulation of Wnt signaling pathway	1	18	0.49095	0.680576	1	0.950167	1
GO:0030833	regulation of actin filament polymerization	1	18	0.49095	0.680576	1	0.950167	1
GO:0032088	negative regulation of NF-kappaB transcription factor activity	1	18	0.49095	0.680576	1	0.950167	1
GO:0042531	positive regulation of tyrosine phosphorylation of STAT protein	1	18	0.49095	0.680576	1	0.950167	1
GO:0043030	regulation of macrophage activation	1	18	0.49095	0.680576	1	0.950167	1
GO:0045921	positive regulation of exocytosis	1	18	0.49095	0.680576	1	0.950167	1
GO:0046425	regulation of receptor signaling pathway via JAK-STAT	1	18	0.49095	0.680576	1	0.950167	1
GO:0050829	defense response to Gram-negative bacterium	1	18	0.49095	0.680576	1	0.950167	1
GO:0070670	response to interleukin-4	1	18	0.49095	0.680576	1	1	1
GO:0072163	mesonephric epithelium development	1	18	0.49095	0.680576	1	0.950167	1
GO:0072164	mesonephric tubule development	1	18	0.49095	0.680576	1	0.950167	1
GO:0141137	positive regulation of gene expression, epigenetic	1	18	0.49095	0.680576	1	0.950167	1
GO:1903076	regulation of protein localization to plasma membrane	1	18	0.49095	0.680576	1	0.950167	1
GO:1903311	regulation of mRNA metabolic process	1	18	0.49095	0.680576	1	0.950167	1
GO:0048871	multicellular organismal-level homeostasis	7	180	0.49467	0.68528	1	1	1
GO:0002286	T cell activation involved in immune response	2	45	0.49705	0.686475	1	1	1
GO:0010212	response to ionizing radiation	2	45	0.49705	0.686475	1	0.958665	1
GO:0045582	positive regulation of T cell differentiation	2	45	0.49705	0.686475	1	0.958665	1
GO:0016049	cell growth	3	72	0.49717	0.686475	1	0.958665	1
GO:0052548	regulation of endopeptidase activity	3	72	0.49717	0.686475	1	0.958665	1
GO:0010646	regulation of cell communication	19	507	0.50115	0.691514	1	1	1
GO:0031326	regulation of cellular biosynthetic process	21	562	0.50434	0.695458	1	1	1
GO:0050673	epithelial cell proliferation	4	100	0.50489	0.695759	1	0.969093	1
GO:0023051	regulation of signaling	19	508	0.50589	0.696679	1	1	1
GO:0016055	Wnt signaling pathway	2	46	0.50901	0.698005	1	0.970614	1
GO:0035710	CD4-positive, alpha-beta T cell activation	2	46	0.50901	0.698005	1	1	1
GO:0002711	positive regulation of T cell mediated immunity	1	19	0.50985	0.698005	1	0.970614	1
GO:0032412	regulation of monoatomic ion transmembrane transporter activity	1	19	0.50985	0.698005	1	0.970614	1
GO:0046006	regulation of activated T cell proliferation	1	19	0.50985	0.698005	1	0.970614	1
GO:0051494	negative regulation of cytoskeleton organization	1	19	0.50985	0.698005	1	0.970614	1
GO:0060251	regulation of glial cell proliferation	1	19	0.50985	0.698005	1	0.970614	1
GO:0072091	regulation of stem cell proliferation	1	19	0.50985	0.698005	1	0.970614	1
GO:1902904	negative regulation of supramolecular fiber organization	1	19	0.50985	0.698005	1	0.970614	1
GO:2001233	regulation of apoptotic signaling pathway	5	128	0.51077	0.698808	1	1	1
GO:0016043	cellular component organization	23	618	0.51235	0.700512	1	1	1
GO:0065009	regulation of molecular function	12	320	0.51754	0.707147	1	1	1
GO:0042102	positive regulation of T cell proliferation	2	47	0.5208	0.710675	1	0.985605	1
GO:0050806	positive regulation of synaptic transmission	2	47	0.5208	0.710675	1	0.985605	1
GO:0048856	anatomical structure development	24	647	0.52126	0.71084	1	1	1
GO:0010467	gene expression	23	620	0.52187	0.710877	1	1	1
GO:0009410	response to xenobiotic stimulus	3	75	0.52557	0.710877	1	0.985605	1
GO:0072593	reactive oxygen species metabolic process	3	75	0.52557	0.710877	1	1	1
GO:0031325	positive regulation of cellular metabolic process	18	485	0.52569	0.710877	1	1	1
GO:0043065	positive regulation of apoptotic process	7	185	0.52634	0.710877	1	1	1
GO:0071840	cellular component organization or biogenesis	23	621	0.52663	0.710877	1	1	1
GO:0010632	regulation of epithelial cell migration	1	20	0.52807	0.710877	1	0.985605	1
GO:0034620	cellular response to unfolded protein	1	20	0.52807	0.710877	1	0.985605	1
GO:0038066	p38MAPK cascade	1	20	0.52807	0.710877	1	0.985605	1
GO:0042092	type 2 immune response	1	20	0.52807	0.710877	1	0.985605	1
GO:0042269	regulation of natural killer cell mediated cytotoxicity	1	20	0.52807	0.710877	1	0.985605	1
GO:0046638	positive regulation of alpha-beta T cell differentiation	1	20	0.52807	0.710877	1	0.985605	1
GO:0048168	regulation of neuronal synaptic plasticity	1	20	0.52807	0.710877	1	0.985605	1
GO:0048284	organelle fusion	1	20	0.52807	0.710877	1	0.985605	1
GO:0060993	kidney morphogenesis	1	20	0.52807	0.710877	1	0.985605	1
GO:0061326	renal tubule development	1	20	0.52807	0.710877	1	0.985605	1
GO:0072009	nephron epithelium development	1	20	0.52807	0.710877	1	0.985605	1
GO:0072080	nephron tubule development	1	20	0.52807	0.710877	1	0.985605	1
GO:1902895	positive regulation of miRNA transcription	1	20	0.52807	0.710877	1	0.985605	1
GO:1904427	positive regulation of calcium ion transmembrane transport	1	20	0.52807	0.710877	1	0.985605	1
GO:0007259	cell surface receptor signaling pathway via JAK-STAT	2	48	0.5324	0.714869	1	0.989282	1
GO:0009306	protein secretion	2	48	0.5324	0.714869	1	0.989282	1
GO:0035592	establishment of protein localization to extracellular region	2	48	0.5324	0.714869	1	0.989282	1
GO:0071692	protein localization to extracellular region	2	48	0.5324	0.714869	1	0.989282	1
GO:0038061	non-canonical NF-kappaB signal transduction	2	49	0.54382	0.7252	1	0.997941	1
GO:0097696	cell surface receptor signaling pathway via STAT	2	49	0.54382	0.7252	1	0.997941	1
GO:1904062	regulation of monoatomic cation transmembrane transport	2	49	0.54382	0.7252	1	0.997941	1
GO:0097190	apoptotic signaling pathway	7	188	0.54506	0.7252	1	1	1
GO:0002715	regulation of natural killer cell mediated immunity	1	21	0.54563	0.7252	1	0.997941	1
GO:0006401	RNA catabolic process	1	21	0.54563	0.7252	1	0.997941	1
GO:0008064	regulation of actin polymerization or depolymerization	1	21	0.54563	0.7252	1	0.997941	1
GO:0030832	regulation of actin filament length	1	21	0.54563	0.7252	1	0.997941	1
GO:0033138	positive regulation of peptidyl-serine phosphorylation	1	21	0.54563	0.7252	1	0.997941	1
GO:0035967	cellular response to topologically incorrect protein	1	21	0.54563	0.7252	1	0.997941	1
GO:0045666	positive regulation of neuron differentiation	1	21	0.54563	0.7252	1	0.997941	1
GO:0045687	positive regulation of glial cell differentiation	1	21	0.54563	0.7252	1	0.997941	1
GO:0051403	stress-activated MAPK cascade	1	21	0.54563	0.7252	1	0.997941	1
GO:0060907	positive regulation of macrophage cytokine production	1	21	0.54563	0.7252	1	0.997941	1
GO:1901655	cellular response to ketone	1	21	0.54563	0.7252	1	0.997941	1
GO:1904646	cellular response to amyloid-beta	1	21	0.54563	0.7252	1	0.997941	1
GO:0052547	regulation of peptidase activity	3	78	0.55315	0.734729	1	1	1
GO:0009636	response to toxic substance	2	50	0.55506	0.736333	1	1	1
GO:0034976	response to endoplasmic reticulum stress	2	50	0.55506	0.736333	1	1	1
GO:0002562	somatic diversification of immune receptors via germline recombination within a single locus	1	22	0.56256	0.739264	1	1	1
GO:0007188	adenylate cyclase-modulating G protein-coupled receptor signaling pathway	1	22	0.56256	0.739264	1	1	1
GO:0008217	regulation of blood pressure	1	22	0.56256	0.739264	1	1	1
GO:0010631	epithelial cell migration	1	22	0.56256	0.739264	1	1	1
GO:0016444	somatic cell DNA recombination	1	22	0.56256	0.739264	1	1	1
GO:0030041	actin filament polymerization	1	22	0.56256	0.739264	1	1	1
GO:0031333	negative regulation of protein-containing complex assembly	1	22	0.56256	0.739264	1	1	1
GO:0042509	regulation of tyrosine phosphorylation of STAT protein	1	22	0.56256	0.739264	1	1	1
GO:0072089	stem cell proliferation	1	22	0.56256	0.739264	1	1	1
GO:0090130	tissue migration	1	22	0.56256	0.739264	1	1	1
GO:0090132	epithelium migration	1	22	0.56256	0.739264	1	1	1
GO:0097061	dendritic spine organization	1	22	0.56256	0.739264	1	1	1
GO:1903035	negative regulation of response to wounding	1	22	0.56256	0.739264	1	1	1
GO:1904645	response to amyloid-beta	1	22	0.56256	0.739264	1	1	1
GO:2000630	positive regulation of miRNA metabolic process	1	22	0.56256	0.739264	1	1	1
GO:0001822	kidney development	2	51	0.56611	0.741604	1	1	1
GO:0032956	regulation of actin cytoskeleton organization	2	51	0.56611	0.741604	1	1	1
GO:0043281	regulation of cysteine-type endopeptidase activity involved in apoptotic process	2	51	0.56611	0.741604	1	1	1
GO:0050792	regulation of viral process	2	51	0.56611	0.741604	1	1	1
GO:0050807	regulation of synapse organization	2	51	0.56611	0.741604	1	1	1
GO:0061061	muscle structure development	4	109	0.5765	0.751729	1	1	1
GO:0048661	positive regulation of smooth muscle cell proliferation	2	52	0.57697	0.751729	1	1	1
GO:0072001	renal system development	2	52	0.57697	0.751729	1	1	1
GO:0001938	positive regulation of endothelial cell proliferation	1	23	0.57886	0.751729	1	1	1
GO:0007260	tyrosine phosphorylation of STAT protein	1	23	0.57886	0.751729	1	1	1
GO:0014911	positive regulation of smooth muscle cell migration	1	23	0.57886	0.751729	1	1	1
GO:0016197	endosomal transport	1	23	0.57886	0.751729	1	1	1
GO:0022898	regulation of transmembrane transporter activity	1	23	0.57886	0.751729	1	1	1
GO:0030902	hindbrain development	1	23	0.57886	0.751729	1	1	1
GO:0031098	stress-activated protein kinase signaling cascade	1	23	0.57886	0.751729	1	1	1
GO:0072332	intrinsic apoptotic signaling pathway by p53 class mediator	1	23	0.57886	0.751729	1	1	1
GO:0090398	cellular senescence	1	23	0.57886	0.751729	1	1	1
GO:0141188	nucleic acid catabolic process	1	23	0.57886	0.751729	1	1	1
GO:1904375	regulation of protein localization to cell periphery	1	23	0.57886	0.751729	1	1	1
GO:0034762	regulation of transmembrane transport	3	81	0.57982	0.752044	1	1	1
GO:0043491	phosphatidylinositol 3-kinase/protein kinase B signal transduction	3	81	0.57982	0.752044	1	1	1
GO:0048167	regulation of synaptic plasticity	2	53	0.58764	0.761244	1	1	1
GO:0050803	regulation of synapse structure or activity	2	53	0.58764	0.761244	1	1	1
GO:0048731	system development	18	499	0.5913	0.764095	1	1	1
GO:0001952	regulation of cell-matrix adhesion	1	24	0.59458	0.764095	1	1	1
GO:0002200	somatic diversification of immune receptors	1	24	0.59458	0.764095	1	1	1
GO:0008154	actin polymerization or depolymerization	1	24	0.59458	0.764095	1	1	1
GO:0016051	carbohydrate biosynthetic process	1	24	0.59458	0.764095	1	1	1
GO:0030890	positive regulation of B cell proliferation	1	24	0.59458	0.764095	1	1	1
GO:0032355	response to estradiol	1	24	0.59458	0.764095	1	1	1
GO:0032409	regulation of transporter activity	1	24	0.59458	0.764095	1	1	1
GO:0032728	positive regulation of interferon-beta production	1	24	0.59458	0.764095	1	1	1
GO:0048678	response to axon injury	1	24	0.59458	0.764095	1	1	1
GO:0051966	regulation of synaptic transmission, glutamatergic	1	24	0.59458	0.764095	1	1	1
GO:0072073	kidney epithelium development	1	24	0.59458	0.764095	1	1	1
GO:0106027	neuron projection organization	1	24	0.59458	0.764095	1	1	1
GO:0045892	negative regulation of DNA-templated transcription	5	140	0.59583	0.764764	1	1	1
GO:1902679	negative regulation of RNA biosynthetic process	5	140	0.59583	0.764764	1	1	1
GO:0060255	regulation of macromolecule metabolic process	23	636	0.59738	0.766284	1	1	1
GO:0009059	macromolecule biosynthetic process	23	638	0.60666	0.776883	1	1	1
GO:0030336	negative regulation of cell migration	2	55	0.6084	0.776883	1	1	1
GO:0051054	positive regulation of DNA metabolic process	2	55	0.6084	0.776883	1	1	1
GO:0000018	regulation of DNA recombination	1	25	0.60972	0.776883	1	1	1
GO:0001961	positive regulation of cytokine-mediated signaling pathway	1	25	0.60972	0.776883	1	1	1
GO:0007163	establishment or maintenance of cell polarity	1	25	0.60972	0.776883	1	1	1
GO:0009100	glycoprotein metabolic process	1	25	0.60972	0.776883	1	1	1
GO:0050796	regulation of insulin secretion	1	25	0.60972	0.776883	1	1	1
GO:0070059	intrinsic apoptotic signaling pathway in response to endoplasmic reticulum stress	1	25	0.60972	0.776883	1	1	1
GO:0071897	DNA biosynthetic process	1	25	0.60972	0.776883	1	1	1
GO:1904064	positive regulation of cation transmembrane transport	1	25	0.60972	0.776883	1	1	1
GO:0000122	negative regulation of transcription by RNA polymerase II	4	115	0.62114	0.790953	1	1	1
GO:0044770	cell cycle phase transition	3	86	0.62213	0.791145	1	1	1
GO:0006367	transcription initiation at RNA polymerase II promoter	1	26	0.62431	0.791145	1	1	1
GO:0006396	RNA processing	1	26	0.62431	0.791145	1	1	1
GO:0033135	regulation of peptidyl-serine phosphorylation	1	26	0.62431	0.791145	1	1	1
GO:0046637	regulation of alpha-beta T cell differentiation	1	26	0.62431	0.791145	1	1	1
GO:0050821	protein stabilization	1	26	0.62431	0.791145	1	1	1
GO:0090150	establishment of protein localization to membrane	1	26	0.62431	0.791145	1	1	1
GO:0099175	regulation of postsynapse organization	1	26	0.62431	0.791145	1	1	1
GO:0032970	regulation of actin filament-based process	2	57	0.62839	0.793915	1	1	1
GO:0071559	response to transforming growth factor beta	2	57	0.62839	0.793915	1	1	1
GO:0071560	cellular response to transforming growth factor beta stimulus	2	57	0.62839	0.793915	1	1	1
GO:0141091	transforming growth factor beta receptor superfamily signaling pathway	2	57	0.62839	0.793915	1	1	1
GO:1901990	regulation of mitotic cell cycle phase transition	2	57	0.62839	0.793915	1	1	1
GO:0001932	regulation of protein phosphorylation	7	203	0.63418	0.79882	1	1	1
GO:2000146	negative regulation of cell motility	2	58	0.6381	0.79882	1	1	1
GO:2001242	regulation of intrinsic apoptotic signaling pathway	2	58	0.6381	0.79882	1	1	1
GO:0006006	glucose metabolic process	1	27	0.63837	0.79882	1	1	1
GO:0006690	icosanoid metabolic process	1	27	0.63837	0.79882	1	1	1
GO:0006986	response to unfolded protein	1	27	0.63837	0.79882	1	1	1
GO:0016239	positive regulation of macroautophagy	1	27	0.63837	0.79882	1	1	1
GO:0030073	insulin secretion	1	27	0.63837	0.79882	1	1	1
GO:0030168	platelet activation	1	27	0.63837	0.79882	1	1	1
GO:0045685	regulation of glial cell differentiation	1	27	0.63837	0.79882	1	1	1
GO:0046683	response to organophosphorus	1	27	0.63837	0.79882	1	1	1
GO:0050770	regulation of axonogenesis	1	27	0.63837	0.79882	1	1	1
GO:0051056	regulation of small GTPase mediated signal transduction	1	27	0.63837	0.79882	1	1	1
GO:0051963	regulation of synapse assembly	1	27	0.63837	0.79882	1	1	1
GO:0061081	positive regulation of myeloid leukocyte cytokine production involved in immune response	1	27	0.63837	0.79882	1	1	1
GO:2001237	negative regulation of extrinsic apoptotic signaling pathway	1	27	0.63837	0.79882	1	1	1
GO:0051336	regulation of hydrolase activity	4	118	0.64241	0.803396	1	1	1
GO:0031334	positive regulation of protein-containing complex assembly	2	59	0.64762	0.806614	1	1	1
GO:0031589	cell-substrate adhesion	2	59	0.64762	0.806614	1	1	1
GO:0040013	negative regulation of locomotion	2	59	0.64762	0.806614	1	1	1
GO:0071356	cellular response to tumor necrosis factor	2	59	0.64762	0.806614	1	1	1
GO:2000116	regulation of cysteine-type endopeptidase activity	2	59	0.64762	0.806614	1	1	1
GO:0051253	negative regulation of RNA metabolic process	5	148	0.64818	0.806614	1	1	1
GO:0032501	multicellular organismal process	28	781	0.65047	0.806614	1	1	1
GO:0043067	regulation of programmed cell death	12	347	0.6516	0.806614	1	1	1
GO:0003158	endothelium development	1	28	0.65191	0.806614	1	1	1
GO:0010935	regulation of macrophage cytokine production	1	28	0.65191	0.806614	1	1	1
GO:0010977	negative regulation of neuron projection development	1	28	0.65191	0.806614	1	1	1
GO:0031960	response to corticosteroid	1	28	0.65191	0.806614	1	1	1
GO:0035966	response to topologically incorrect protein	1	28	0.65191	0.806614	1	1	1
GO:0048708	astrocyte differentiation	1	28	0.65191	0.806614	1	1	1
GO:0051384	response to glucocorticoid	1	28	0.65191	0.806614	1	1	1
GO:0090276	regulation of peptide hormone secretion	1	28	0.65191	0.806614	1	1	1
GO:0097192	extrinsic apoptotic signaling pathway in absence of ligand	1	28	0.65191	0.806614	1	1	1
GO:1901991	negative regulation of mitotic cell cycle phase transition	1	28	0.65191	0.806614	1	1	1
GO:0050878	regulation of body fluid levels	2	60	0.65694	0.812358	1	1	1
GO:0007275	multicellular organism development	20	569	0.66107	0.815062	1	1	1
GO:0043254	regulation of protein-containing complex assembly	3	91	0.66162	0.815062	1	1	1
GO:0002791	regulation of peptide secretion	1	29	0.66496	0.815062	1	1	1
GO:0006352	DNA-templated transcription initiation	1	29	0.66496	0.815062	1	1	1
GO:0014910	regulation of smooth muscle cell migration	1	29	0.66496	0.815062	1	1	1
GO:0019318	hexose metabolic process	1	29	0.66496	0.815062	1	1	1
GO:0030308	negative regulation of cell growth	1	29	0.66496	0.815062	1	1	1
GO:0032271	regulation of protein polymerization	1	29	0.66496	0.815062	1	1	1
GO:0038034	signal transduction in absence of ligand	1	29	0.66496	0.815062	1	1	1
GO:0043433	negative regulation of DNA-binding transcription factor activity	1	29	0.66496	0.815062	1	1	1
GO:0050680	negative regulation of epithelial cell proliferation	1	29	0.66496	0.815062	1	1	1
GO:0060291	long-term synaptic potentiation	1	29	0.66496	0.815062	1	1	1
GO:0072331	signal transduction by p53 class mediator	1	29	0.66496	0.815062	1	1	1
GO:0090087	regulation of peptide transport	1	29	0.66496	0.815062	1	1	1
GO:2000514	regulation of CD4-positive, alpha-beta T cell activation	1	29	0.66496	0.815062	1	1	1
GO:0051146	striated muscle cell differentiation	2	61	0.66608	0.815958	1	1	1
GO:0070201	regulation of establishment of protein localization	3	92	0.66917	0.819264	1	1	1
GO:0032502	developmental process	24	679	0.67078	0.820756	1	1	1
GO:0071900	regulation of protein serine/threonine kinase activity	2	62	0.67502	0.820855	1	1	1
GO:2001235	positive regulation of apoptotic signaling pathway	2	62	0.67502	0.820855	1	1	1
GO:0002009	morphogenesis of an epithelium	3	93	0.6766	0.820855	1	1	1
GO:0008104	protein localization	9	268	0.67692	0.820855	1	1	1
GO:0001836	release of cytochrome c from mitochondria	1	30	0.67753	0.820855	1	1	1
GO:0005996	monosaccharide metabolic process	1	30	0.67753	0.820855	1	1	1
GO:0007519	skeletal muscle tissue development	1	30	0.67753	0.820855	1	1	1
GO:0010934	macrophage cytokine production	1	30	0.67753	0.820855	1	1	1
GO:0014009	glial cell proliferation	1	30	0.67753	0.820855	1	1	1
GO:0030307	positive regulation of cell growth	1	30	0.67753	0.820855	1	1	1
GO:0030879	mammary gland development	1	30	0.67753	0.820855	1	1	1
GO:0035249	synaptic transmission, glutamatergic	1	30	0.67753	0.820855	1	1	1
GO:0051961	negative regulation of nervous system development	1	30	0.67753	0.820855	1	1	1
GO:0060337	type I interferon-mediated signaling pathway	1	30	0.67753	0.820855	1	1	1
GO:0060538	skeletal muscle organ development	1	30	0.67753	0.820855	1	1	1
GO:0071357	cellular response to type I interferon	1	30	0.67753	0.820855	1	1	1
GO:1901224	positive regulation of non-canonical NF-kappaB signal transduction	1	30	0.67753	0.820855	1	1	1
GO:0042325	regulation of phosphorylation	7	211	0.67791	0.820855	1	1	1
GO:0010604	positive regulation of macromolecule metabolic process	17	492	0.68159	0.824588	1	1	1
GO:0070727	cellular macromolecule localization	9	269	0.68178	0.824588	1	1	1
GO:0071363	cellular response to growth factor stimulus	4	124	0.6827	0.825102	1	1	1
GO:1901700	response to oxygen-containing compound	12	354	0.68354	0.825102	1	1	1
GO:0007178	cell surface receptor protein serine/threonine kinase signaling pathway	2	63	0.68378	0.825102	1	1	1
GO:0048660	regulation of smooth muscle cell proliferation	2	63	0.68378	0.825102	1	1	1
GO:0002064	epithelial cell development	1	31	0.68964	0.828833	1	1	1
GO:0007584	response to nutrient	1	31	0.68964	0.828833	1	1	1
GO:0014074	response to purine-containing compound	1	31	0.68964	0.828833	1	1	1
GO:0014909	smooth muscle cell migration	1	31	0.68964	0.828833	1	1	1
GO:0030072	peptide hormone secretion	1	31	0.68964	0.828833	1	1	1
GO:0030218	erythrocyte differentiation	1	31	0.68964	0.828833	1	1	1
GO:0043200	response to amino acid	1	31	0.68964	0.828833	1	1	1
GO:0006468	protein phosphorylation	9	271	0.69136	0.830424	1	1	1
GO:0048659	smooth muscle cell proliferation	2	64	0.69236	0.830673	1	1	1
GO:1904951	positive regulation of establishment of protein localization	2	64	0.69236	0.830673	1	1	1
GO:0043066	negative regulation of apoptotic process	7	214	0.69353	0.831601	1	1	1
GO:0044093	positive regulation of molecular function	7	215	0.69863	0.837238	1	1	1
GO:0002790	peptide secretion	1	32	0.70131	0.838053	1	1	1
GO:0006605	protein targeting	1	32	0.70131	0.838053	1	1	1
GO:0014812	muscle cell migration	1	32	0.70131	0.838053	1	1	1
GO:0032608	interferon-beta production	1	32	0.70131	0.838053	1	1	1
GO:0032648	regulation of interferon-beta production	1	32	0.70131	0.838053	1	1	1
GO:0016070	RNA metabolic process	12	359	0.70544	0.842508	1	1	1
GO:0070848	response to growth factor	4	128	0.70786	0.844917	1	1	1
GO:0022008	neurogenesis	8	246	0.70883	0.845256	1	1	1
GO:0051493	regulation of cytoskeleton organization	2	66	0.70895	0.845256	1	1	1
GO:0045859	regulation of protein kinase activity	3	98	0.71201	0.846658	1	1	1
GO:0007612	learning	1	33	0.71255	0.846658	1	1	1
GO:0019827	stem cell population maintenance	1	33	0.71255	0.846658	1	1	1
GO:0034340	response to type I interferon	1	33	0.71255	0.846658	1	1	1
GO:0046330	positive regulation of JNK cascade	1	33	0.71255	0.846658	1	1	1
GO:0050714	positive regulation of protein secretion	1	33	0.71255	0.846658	1	1	1
GO:0141187	nucleic acid biosynthetic process	12	361	0.71397	0.847865	1	1	1
GO:0050769	positive regulation of neurogenesis	2	67	0.71697	0.850945	1	1	1
GO:0009058	biosynthetic process	24	690	0.71819	0.851599	1	1	1
GO:0007249	canonical NF-kappaB signal transduction	3	99	0.71874	0.851599	1	1	1
GO:0040008	regulation of growth	3	99	0.71874	0.851599	1	1	1
GO:0015833	peptide transport	1	34	0.72338	0.853238	1	1	1
GO:0015850	organic hydroxy compound transport	1	34	0.72338	0.853238	1	1	1
GO:0030323	respiratory tube development	1	34	0.72338	0.853238	1	1	1
GO:0030324	lung development	1	34	0.72338	0.853238	1	1	1
GO:0031644	regulation of nervous system process	1	34	0.72338	0.853238	1	1	1
GO:0048469	cell maturation	1	34	0.72338	0.853238	1	1	1
GO:0071333	cellular response to glucose stimulus	1	34	0.72338	0.853238	1	1	1
GO:2001243	negative regulation of intrinsic apoptotic signaling pathway	1	34	0.72338	0.853238	1	1	1
GO:0044772	mitotic cell cycle phase transition	2	68	0.72481	0.853964	1	1	1
GO:0050671	positive regulation of lymphocyte proliferation	2	68	0.72481	0.853964	1	1	1
GO:0097193	intrinsic apoptotic signaling pathway	3	100	0.72535	0.85412	1	1	1
GO:0042981	regulation of apoptotic process	11	336	0.72761	0.855431	1	1	1
GO:0031323	regulation of cellular metabolic process	22	639	0.72799	0.855431	1	1	1
GO:0048729	tissue morphogenesis	3	101	0.73185	0.855431	1	1	1
GO:0050804	modulation of chemical synaptic transmission	3	101	0.73185	0.855431	1	1	1
GO:0034504	protein localization to nucleus	2	69	0.73248	0.855431	1	1	1
GO:2001234	negative regulation of apoptotic signaling pathway	2	69	0.73248	0.855431	1	1	1
GO:0009893	positive regulation of metabolic process	18	532	0.73289	0.855431	1	1	1
GO:0034101	erythrocyte homeostasis	1	35	0.73381	0.855431	1	1	1
GO:0042886	amide transport	1	35	0.73381	0.855431	1	1	1
GO:0043406	positive regulation of MAP kinase activity	1	35	0.73381	0.855431	1	1	1
GO:0048709	oligodendrocyte differentiation	1	35	0.73381	0.855431	1	1	1
GO:0051258	protein polymerization	1	35	0.73381	0.855431	1	1	1
GO:0060541	respiratory system development	1	35	0.73381	0.855431	1	1	1
GO:0071326	cellular response to monosaccharide stimulus	1	35	0.73381	0.855431	1	1	1
GO:0071331	cellular response to hexose stimulus	1	35	0.73381	0.855431	1	1	1
GO:0071383	cellular response to steroid hormone stimulus	1	35	0.73381	0.855431	1	1	1
GO:0072659	protein localization to plasma membrane	1	35	0.73381	0.855431	1	1	1
GO:0098727	maintenance of cell number	1	35	0.73381	0.855431	1	1	1
GO:0043069	negative regulation of programmed cell death	7	223	0.73764	0.859418	1	1	1
GO:0099177	regulation of trans-synaptic signaling	3	102	0.73823	0.859628	1	1	1
GO:0008015	blood circulation	2	70	0.73997	0.86022	1	1	1
GO:0032946	positive regulation of mononuclear cell proliferation	2	70	0.73997	0.86022	1	1	1
GO:0060562	epithelial tube morphogenesis	2	70	0.73997	0.86022	1	1	1
GO:0008219	cell death	13	396	0.74214	0.861787	1	1	1
GO:0012501	programmed cell death	13	396	0.74214	0.861787	1	1	1
GO:0032869	cellular response to insulin stimulus	1	36	0.74385	0.863093	1	1	1
GO:0043523	regulation of neuron apoptotic process	3	103	0.7445	0.863093	1	1	1
GO:0080135	regulation of cellular response to stress	3	103	0.7445	0.863093	1	1	1
GO:0044249	cellular biosynthetic process	23	670	0.74496	0.863149	1	1	1
GO:0045934	negative regulation of nucleobase-containing compound metabolic process	5	166	0.75049	0.867183	1	1	1
GO:0051252	regulation of RNA metabolic process	11	342	0.75215	0.867183	1	1	1
GO:0001101	response to acid chemical	1	37	0.75353	0.867183	1	1	1
GO:0003018	vascular process in circulatory system	1	37	0.75353	0.867183	1	1	1
GO:0016241	regulation of macroautophagy	1	37	0.75353	0.867183	1	1	1
GO:0043280	positive regulation of cysteine-type endopeptidase activity involved in apoptotic process	1	37	0.75353	0.867183	1	1	1
GO:0045926	negative regulation of growth	1	37	0.75353	0.867183	1	1	1
GO:0045930	negative regulation of mitotic cell cycle	1	37	0.75353	0.867183	1	1	1
GO:0046883	regulation of hormone secretion	1	37	0.75353	0.867183	1	1	1
GO:0048754	branching morphogenesis of an epithelial tube	1	37	0.75353	0.867183	1	1	1
GO:0110053	regulation of actin filament organization	1	37	0.75353	0.867183	1	1	1
GO:0140888	interferon-mediated signaling pathway	1	37	0.75353	0.867183	1	1	1
GO:0016310	phosphorylation	9	285	0.75382	0.867183	1	1	1
GO:0023061	signal release	2	72	0.75443	0.867408	1	1	1
GO:0019220	regulation of phosphate metabolic process	7	227	0.75588	0.868123	1	1	1
GO:0051174	regulation of phosphorus metabolic process	7	227	0.75588	0.868123	1	1	1
GO:0043549	regulation of kinase activity	3	105	0.75669	0.868577	1	1	1
GO:0050790	regulation of catalytic activity	7	228	0.76031	0.871342	1	1	1
GO:1901135	carbohydrate derivative metabolic process	2	73	0.76141	0.871342	1	1	1
GO:0009888	tissue development	8	258	0.76268	0.871342	1	1	1
GO:0001678	intracellular glucose homeostasis	1	38	0.76284	0.871342	1	1	1
GO:0007416	synapse assembly	1	38	0.76284	0.871342	1	1	1
GO:0008637	apoptotic mitochondrial changes	1	38	0.76284	0.871342	1	1	1
GO:0031345	negative regulation of cell projection organization	1	38	0.76284	0.871342	1	1	1
GO:0048534	hematopoietic or lymphoid organ development	1	38	0.76284	0.871342	1	1	1
GO:0048863	stem cell differentiation	1	38	0.76284	0.871342	1	1	1
GO:1901699	cellular response to nitrogen compound	4	138	0.76466	0.872945	1	1	1
GO:0030111	regulation of Wnt signaling pathway	1	39	0.77182	0.879682	1	1	1
GO:0061082	myeloid leukocyte cytokine production	1	39	0.77182	0.879682	1	1	1
GO:0071322	cellular response to carbohydrate stimulus	1	39	0.77182	0.879682	1	1	1
GO:0003013	circulatory system process	2	75	0.77487	0.882199	1	1	1
GO:1901987	regulation of cell cycle phase transition	2	75	0.77487	0.882199	1	1	1
GO:0019219	regulation of nucleobase-containing compound metabolic process	12	377	0.77718	0.884348	1	1	1
GO:0032774	RNA biosynthetic process	11	349	0.77903	0.885972	1	1	1
GO:0001659	temperature homeostasis	1	40	0.78046	0.886096	1	1	1
GO:0010810	regulation of cell-substrate adhesion	1	40	0.78046	0.886096	1	1	1
GO:1901888	regulation of cell junction assembly	1	40	0.78046	0.886096	1	1	1
GO:0034654	nucleobase-containing compound biosynthetic process	12	378	0.78083	0.886096	1	1	1
GO:0051962	positive regulation of nervous system development	2	76	0.78136	0.886218	1	1	1
GO:0042692	muscle cell differentiation	2	77	0.78768	0.888873	1	1	1
GO:0051052	regulation of DNA metabolic process	2	77	0.78768	0.888873	1	1	1
GO:0051345	positive regulation of hydrolase activity	2	77	0.78768	0.888873	1	1	1
GO:0001649	osteoblast differentiation	1	41	0.78879	0.888873	1	1	1
GO:0007272	ensheathment of neurons	1	41	0.78879	0.888873	1	1	1
GO:0008366	axon ensheathment	1	41	0.78879	0.888873	1	1	1
GO:0009914	hormone transport	1	41	0.78879	0.888873	1	1	1
GO:0042552	myelination	1	41	0.78879	0.888873	1	1	1
GO:0046328	regulation of JNK cascade	1	41	0.78879	0.888873	1	1	1
GO:0046879	hormone secretion	1	41	0.78879	0.888873	1	1	1
GO:0061138	morphogenesis of a branching epithelium	1	41	0.78879	0.888873	1	1	1
GO:0099173	postsynapse organization	1	41	0.78879	0.888873	1	1	1
GO:0007268	chemical synaptic transmission	3	111	0.79059	0.889467	1	1	1
GO:0051338	regulation of transferase activity	3	111	0.79059	0.889467	1	1	1
GO:0098916	anterograde trans-synaptic signaling	3	111	0.79059	0.889467	1	1	1
GO:0070665	positive regulation of leukocyte proliferation	2	78	0.79386	0.892323	1	1	1
GO:0051402	neuron apoptotic process	3	112	0.79586	0.892323	1	1	1
GO:0006606	protein import into nucleus	1	42	0.7968	0.892323	1	1	1
GO:0009267	cellular response to starvation	1	42	0.7968	0.892323	1	1	1
GO:0045664	regulation of neuron differentiation	1	42	0.7968	0.892323	1	1	1
GO:0051170	import into nucleus	1	42	0.7968	0.892323	1	1	1
GO:1900180	regulation of protein localization to nucleus	1	42	0.7968	0.892323	1	1	1
GO:1901654	response to ketone	1	42	0.7968	0.892323	1	1	1
GO:0019222	regulation of metabolic process	23	684	0.79696	0.892323	1	1	1
GO:0035556	intracellular signal transduction	16	495	0.79778	0.892764	1	1	1
GO:0007346	regulation of mitotic cell cycle	2	79	0.79987	0.893195	1	1	1
GO:0010001	glial cell differentiation	2	79	0.79987	0.893195	1	1	1
GO:0050808	synapse organization	2	79	0.79987	0.893195	1	1	1
GO:0051223	regulation of protein transport	2	79	0.79987	0.893195	1	1	1
GO:0045944	positive regulation of transcription by RNA polymerase II	5	177	0.80183	0.894498	1	1	1
GO:0006915	apoptotic process	12	384	0.80189	0.894498	1	1	1
GO:0007417	central nervous system development	4	146	0.80393	0.896001	1	1	1
GO:0016358	dendrite development	1	43	0.80452	0.896001	1	1	1
GO:2001056	positive regulation of cysteine-type endopeptidase activity	1	43	0.80452	0.896001	1	1	1
GO:0030162	regulation of proteolysis	3	114	0.80608	0.896785	1	1	1
GO:0099537	trans-synaptic signaling	3	114	0.80608	0.896785	1	1	1
GO:0051649	establishment of localization in cell	6	209	0.8067	0.896999	1	1	1
GO:0065008	regulation of biological quality	11	357	0.80741	0.897312	1	1	1
GO:0033002	muscle cell proliferation	2	81	0.81146	0.901336	1	1	1
GO:0071902	positive regulation of protein serine/threonine kinase activity	1	44	0.81195	0.901402	1	1	1
GO:0031399	regulation of protein modification process	7	242	0.81669	0.905514	1	1	1
GO:0090304	nucleic acid metabolic process	13	417	0.81701	0.905514	1	1	1
GO:0007517	muscle organ development	1	45	0.81911	0.905514	1	1	1
GO:0032868	response to insulin	1	45	0.81911	0.905514	1	1	1
GO:0034655	nucleobase-containing compound catabolic process	1	45	0.81911	0.905514	1	1	1
GO:0042594	response to starvation	1	45	0.81911	0.905514	1	1	1
GO:0042770	signal transduction in response to DNA damage	1	45	0.81911	0.905514	1	1	1
GO:0046777	protein autophosphorylation	1	45	0.81911	0.905514	1	1	1
GO:0099536	synaptic signaling	3	117	0.82063	0.906716	1	1	1
GO:0001934	positive regulation of protein phosphorylation	4	150	0.82158	0.907288	1	1	1
GO:0033036	macromolecule localization	9	304	0.82488	0.909772	1	1	1
GO:0001763	morphogenesis of a branching structure	1	46	0.826	0.909772	1	1	1
GO:0030031	cell projection assembly	1	46	0.826	0.909772	1	1	1
GO:0120031	plasma membrane bounded cell projection assembly	1	46	0.826	0.909772	1	1	1
GO:1901988	negative regulation of cell cycle phase transition	1	46	0.826	0.909772	1	1	1
GO:0006355	regulation of DNA-templated transcription	10	334	0.82709	0.909798	1	1	1
GO:2001141	regulation of RNA biosynthetic process	10	334	0.82709	0.909798	1	1	1
GO:0048858	cell projection morphogenesis	2	84	0.82776	0.909798	1	1	1
GO:0120039	plasma membrane bounded cell projection morphogenesis	2	84	0.82776	0.909798	1	1	1
GO:0120035	regulation of plasma membrane bounded cell projection organization	3	119	0.82983	0.910863	1	1	1
GO:0042327	positive regulation of phosphorylation	4	152	0.82992	0.910863	1	1	1
GO:0009749	response to glucose	1	47	0.83264	0.910863	1	1	1
GO:0010950	positive regulation of endopeptidase activity	1	47	0.83264	0.910863	1	1	1
GO:0031099	regeneration	1	47	0.83264	0.910863	1	1	1
GO:0043525	positive regulation of neuron apoptotic process	1	47	0.83264	0.910863	1	1	1
GO:0046632	alpha-beta T cell differentiation	1	47	0.83264	0.910863	1	1	1
GO:0071695	anatomical structure maturation	1	47	0.83264	0.910863	1	1	1
GO:1990778	protein localization to cell periphery	1	47	0.83264	0.910863	1	1	1
GO:0043122	regulation of canonical NF-kappaB signal transduction	2	86	0.83793	0.916172	1	1	1
GO:0031344	regulation of cell projection organization	3	121	0.83864	0.916407	1	1	1
GO:0010508	positive regulation of autophagy	1	48	0.83902	0.916407	1	1	1
GO:0006351	DNA-templated transcription	10	339	0.84263	0.917863	1	1	1
GO:0043434	response to peptide hormone	2	87	0.84282	0.917863	1	1	1
GO:0097435	supramolecular fiber organization	2	87	0.84282	0.917863	1	1	1
GO:0007264	small GTPase-mediated signal transduction	1	49	0.84517	0.917863	1	1	1
GO:0009746	response to hexose	1	49	0.84517	0.917863	1	1	1
GO:0010952	positive regulation of peptidase activity	1	49	0.84517	0.917863	1	1	1
GO:0031647	regulation of protein stability	1	49	0.84517	0.917863	1	1	1
GO:0033500	carbohydrate homeostasis	1	49	0.84517	0.917863	1	1	1
GO:0042593	glucose homeostasis	1	49	0.84517	0.917863	1	1	1
GO:0045927	positive regulation of growth	1	49	0.84517	0.917863	1	1	1
GO:0051656	establishment of organelle localization	1	49	0.84517	0.917863	1	1	1
GO:0050767	regulation of neurogenesis	2	88	0.84757	0.919993	1	1	1
GO:0010639	negative regulation of organelle organization	1	50	0.85109	0.923336	1	1	1
GO:0009314	response to radiation	2	89	0.8522	0.924062	1	1	1
GO:0045935	positive regulation of nucleobase-containing compound metabolic process	7	253	0.85379	0.925307	1	1	1
GO:0048732	gland development	2	90	0.85671	0.92712	1	1	1
GO:0031669	cellular response to nutrient levels	1	51	0.85679	0.92712	1	1	1
GO:0034284	response to monosaccharide	1	51	0.85679	0.92712	1	1	1
GO:0031667	response to nutrient levels	2	91	0.86109	0.931138	1	1	1
GO:0010608	post-transcriptional regulation of gene expression	1	52	0.86228	0.931138	1	1	1
GO:0010948	negative regulation of cell cycle process	1	52	0.86228	0.931138	1	1	1
GO:0043010	camera-type eye development	1	52	0.86228	0.931138	1	1	1
GO:1901698	response to nitrogen compound	6	225	0.8629	0.931264	1	1	1
GO:0010562	positive regulation of phosphorus metabolic process	4	161	0.86373	0.931264	1	1	1
GO:0045937	positive regulation of phosphate metabolic process	4	161	0.86373	0.931264	1	1	1
GO:0007399	nervous system development	9	317	0.86432	0.931421	1	1	1
GO:0007420	brain development	2	92	0.86536	0.932063	1	1	1
GO:0007254	JNK cascade	1	53	0.86756	0.933473	1	1	1
GO:1902903	regulation of supramolecular fiber organization	1	53	0.86756	0.933473	1	1	1
GO:0050877	nervous system process	3	129	0.87019	0.935823	1	1	1
GO:0006913	nucleocytoplasmic transport	1	54	0.87265	0.937506	1	1	1
GO:0051169	nuclear transport	1	54	0.87265	0.937506	1	1	1
GO:1903047	mitotic cell cycle process	2	95	0.87747	0.940831	1	1	1
GO:0007015	actin filament organization	1	55	0.87754	0.940831	1	1	1
GO:0018105	peptidyl-serine phosphorylation	1	55	0.87754	0.940831	1	1	1
GO:0018209	peptidyl-serine modification	1	55	0.87754	0.940831	1	1	1
GO:0043542	endothelial cell migration	1	56	0.88225	0.945397	1	1	1
GO:0051222	positive regulation of protein transport	1	57	0.88678	0.949765	1	1	1
GO:0048513	animal organ development	10	356	0.88797	0.950554	1	1	1
GO:0031175	neuron projection development	3	135	0.89027	0.951528	1	1	1
GO:0043170	macromolecule metabolic process	25	767	0.89034	0.951528	1	1	1
GO:0080090	regulation of primary metabolic process	17	556	0.89037	0.951528	1	1	1
GO:0001654	eye development	1	58	0.89115	0.951528	1	1	1
GO:0009743	response to carbohydrate	1	58	0.89115	0.951528	1	1	1
GO:0006914	autophagy	2	99	0.89209	0.951563	1	1	1
GO:0061919	process utilizing autophagic mechanism	2	99	0.89209	0.951563	1	1	1
GO:0006310	DNA recombination	1	59	0.89535	0.9531	1	1	1
GO:0007409	axonogenesis	1	59	0.89535	0.9531	1	1	1
GO:0010817	regulation of hormone levels	1	59	0.89535	0.9531	1	1	1
GO:0048771	tissue remodeling	1	59	0.89535	0.9531	1	1	1
GO:0033365	protein localization to organelle	3	137	0.89634	0.953669	1	1	1
GO:0022402	cell cycle process	3	138	0.89927	0.954492	1	1	1
GO:0016236	macroautophagy	1	60	0.89939	0.954492	1	1	1
GO:0021700	developmental maturation	1	60	0.89939	0.954492	1	1	1
GO:0040029	epigenetic regulation of gene expression	1	60	0.89939	0.954492	1	1	1
GO:0044283	small molecule biosynthetic process	1	60	0.89939	0.954492	1	1	1
GO:0002753	cytoplasmic pattern recognition receptor signaling pathway	1	61	0.90327	0.956189	1	1	1
GO:0034329	cell junction assembly	1	61	0.90327	0.956189	1	1	1
GO:0043524	negative regulation of neuron apoptotic process	1	61	0.90327	0.956189	1	1	1
GO:0048545	response to steroid hormone	1	61	0.90327	0.956189	1	1	1
GO:0150063	visual system development	1	61	0.90327	0.956189	1	1	1
GO:0031401	positive regulation of protein modification process	4	175	0.90525	0.956295	1	1	1
GO:0051246	regulation of protein metabolic process	9	334	0.90541	0.956295	1	1	1
GO:0006357	regulation of transcription by RNA polymerase II	6	241	0.9055	0.956295	1	1	1
GO:0009719	response to endogenous stimulus	6	241	0.9055	0.956295	1	1	1
GO:0005975	carbohydrate metabolic process	1	62	0.90702	0.956295	1	1	1
GO:0007005	mitochondrion organization	1	62	0.90702	0.956295	1	1	1
GO:0031331	positive regulation of cellular catabolic process	1	62	0.90702	0.956295	1	1	1
GO:0032535	regulation of cellular component size	1	62	0.90702	0.956295	1	1	1
GO:0006139	nucleobase-containing compound metabolic process	13	453	0.90872	0.957226	1	1	1
GO:0003008	system process	5	210	0.90887	0.957226	1	1	1
GO:0048880	sensory system development	1	63	0.91062	0.957226	1	1	1
GO:0051640	organelle localization	1	63	0.91062	0.957226	1	1	1
GO:0071375	cellular response to peptide hormone stimulus	1	63	0.91062	0.957226	1	1	1
GO:0000278	mitotic cell cycle	2	105	0.9111	0.957226	1	1	1
GO:0010564	regulation of cell cycle process	2	105	0.9111	0.957226	1	1	1
GO:0120036	plasma membrane bounded cell projection organization	4	178	0.9126	0.957956	1	1	1
GO:0051960	regulation of nervous system development	2	106	0.91396	0.957956	1	1	1
GO:0030900	forebrain development	1	64	0.91408	0.957956	1	1	1
[truncated: 98 more rows]

## Sheet: MG IFNAR KO TBI vs WT TBI
MG IFNAR KO TBI vs WT TBI
goId	goName	countDE	countAll	pv	pv_fdr	pv_bonferroni	pv_elim	pv_weight	neg log 10
GO:0051607	defense response to virus	23	99	3.4e-12	6.528e-10	5.8752e-09	0.019296	1.296e-06	5.88739
GO:0045071	negative regulation of viral genome replication	10	19	1.5e-09	1.85143e-07	2.592e-06	2.592e-06	1.296e-06	5.88739
GO:0035456	response to interferon-beta	10	23	1.7e-08	1.82965e-06	2.9376e-05	0.142848	9.792e-06	5.00913
GO:0060337	type I interferon-mediated signaling pathway	11	33	7.9e-08	6.20509e-06	0.000136512	0.06528	3.4128e-05	4.46689
GO:0045087	innate immune response	38	251	4.7e-15	1.3536e-12	8.1216e-12	0.12384	7.9488e-05	4.0997
GO:0070106	interleukin-27-mediated signaling pathway	5	6	1.1e-06	6.78857e-05	0.0019008	0.0006336	0.0003168	3.49921
GO:0009617	response to bacterium	23	194	4.4e-06	0.0002304	0.0076032	0.832261	0.0135771	1.86719
GO:0032728	positive regulation of interferon-beta production	7	24	6.5e-05	0.002376	0.11232	0.019296	0.01404	1.85263
GO:0002230	positive regulation of defense response to virus by host	5	13	0.00019	0.005472	0.32832	0.04104	0.032832	neg log 11
GO:0048245	eosinophil chemotaxis	5	13	0.00019	0.005472	0.32832	0.04104	0.032832	1.4837
GO:0002376	immune system process	50	583	6.4e-12	1.10592e-09	1.10592e-08	1	0.0377018	1.42364
GO:0070269	pyroptotic inflammatory response	5	14	0.00028	0.00780387	0.48384	0.977845	0.04032	1.39448
GO:0019730	antimicrobial humoral response	7	30	0.00031	0.00850286	0.53568	1	0.0412062	1.38504
GO:0035455	response to interferon-alpha	5	16	0.00057	0.0131328	0.98496	0.832261	0.066816
GO:0062208	positive regulation of pattern recognition receptor signaling pathway	6	24	0.00058	0.0131874	1	0.638096	0.066816
GO:0001961	positive regulation of cytokine-mediated signaling pathway	6	27	0.00114	0.0240234	1	1	0.12312
GO:0032020	ISG15-protein conjugation	2	2	0.00219	0.0381888	1	0.197486	0.199175
GO:0060700	regulation of ribonuclease activity	2	2	0.00219	0.0381888	1	0.197486	0.199175
GO:2000342	negative regulation of chemokine (C-X-C motif) ligand 2 production	2	2	0.00219	0.0381888	1	0.197486	0.199175
GO:0090026	positive regulation of monocyte chemotaxis	4	13	0.00231	0.0395216	1	0.197486	0.199584
GO:0002486	antigen processing and presentation of endogenous peptide antigen via MHC class I via ER pathway, TAP-independent	3	7	0.00304	0.04864	1	0.238778	0.250149
GO:0070098	chemokine-mediated signaling pathway	7	37	0.0012	0.0249831	1	0.327655	0.321558
GO:0032727	positive regulation of interferon-alpha production	4	15	0.0041	0.0626973	1	0.308035	0.321558
GO:0071222	cellular response to lipopolysaccharide	10	86	0.00515	0.0735471	1	0.3296	0.366336
GO:0002485	antigen processing and presentation of endogenous peptide antigen via MHC class I via ER pathway, TAP-dependent	2	3	0.00636	0.0845391	1	0.333033	0.366336
GO:0002841	negative regulation of T cell mediated immune response to tumor cell	2	3	0.00636	0.0845391	1	0.333033	0.366336
GO:0032897	negative regulation of viral transcription	2	3	0.00636	0.0845391	1	0.333033	0.366336
GO:0035563	positive regulation of chromatin binding	2	3	0.00636	0.0845391	1	0.333033	0.366336
GO:0044406	adhesion of symbiont to host	2	3	0.00636	0.0845391	1	0.333033	0.366336
GO:0071659	negative regulation of IP-10 production	2	3	0.00636	0.0845391	1	0.333033	0.366336
GO:0010818	T cell chemotaxis	3	9	0.00682	0.0886087	1	1	0.38016
GO:0002753	cytoplasmic pattern recognition receptor signaling pathway	10	63	0.00043	0.0112582	0.74304	0.832261	0.41958
GO:0001788	antibody-dependent cellular cytotoxicity	3	5	0.00093	0.0203423	1	0.554732	0.584718
GO:0034242	negative regulation of syncytium formation by plasma membrane fusion	2	4	0.01234	0.135216	1	1	0.584718
GO:0042270	protection from natural killer cell mediated cytotoxicity	2	4	0.01234	0.135216	1	0.554732	0.584718
GO:0051715	cytolysis in another organism	2	4	0.01234	0.135216	1	0.554732	0.584718
GO:0070234	positive regulation of T cell apoptotic process	3	11	0.01252	0.135216	1	1	0.584718
GO:0002478	antigen processing and presentation of exogenous peptide antigen	4	21	0.01456	0.155307	1	1	0.662097
GO:0001916	positive regulation of T cell mediated cytotoxicity	3	12	0.01615	0.170166	1	0.664457	0.715569
GO:0001798	positive regulation of type IIa hypersensitivity	2	5	0.01995	0.18745	1	1	0.84082
GO:2000501	regulation of natural killer cell chemotaxis	2	5	0.01995	0.18745	1	1	0.84082
GO:0060760	positive regulation of response to cytokine stimulus	8	31	4.9e-05	0.0018407	0.084672	0.832261	0.991954
GO:0140546	defense response to symbiont	42	289	7.7e-17	1.33056e-13	1.33056e-13	1	1
GO:0098542	defense response to other organism	43	314	2e-16	1.728e-13	3.456e-13	1	1
GO:0009607	response to biotic stimulus	46	387	9.3e-16	5.3568e-13	1.60704e-12	1	1
GO:0043207	response to external biotic stimulus	45	377	3.7e-15	1.27872e-12	6.3936e-12	1	1
GO:0051707	response to other organism	45	377	3.7e-15	1.27872e-12	6.3936e-12	1	1
GO:0044419	biological process involved in interspecies interaction between organisms	45	399	4.4e-14	1.08617e-11	7.6032e-11	1	1
GO:0006955	immune response	46	459	1.9e-12	4.104e-10	3.2832e-09	1	1
GO:0009615	response to virus	24	119	2.6e-11	4.08436e-09	4.4928e-08	1	1
GO:0006952	defense response	43	432	9.4e-11	1.3536e-08	1.62432e-07	1	1
GO:0009605	response to external stimulus	45	505	9.1e-10	1.2096e-07	1.57248e-06	1	1
GO:0048525	negative regulation of viral process	12	35	1.3e-08	1.4976e-06	2.2464e-05	1	1
GO:0034340	response to type I interferon	12	36	1.8e-08	1.82965e-06	3.1104e-05	1	1
GO:0002831	regulation of response to biotic stimulus	24	162	2.6e-08	2.496e-06	4.4928e-05	1	1
GO:0019079	viral genome replication	11	32	5.5e-08	5.00211e-06	9.504e-05	1	1
GO:0140888	interferon-mediated signaling pathway	12	40	7.1e-08	6.1344e-06	0.000122688	1	1
GO:0071357	cellular response to type I interferon	11	33	7.9e-08	6.20509e-06	0.000136512	1	1
GO:0045069	regulation of viral genome replication	10	27	1.1e-07	8.26435e-06	0.00019008	1	1
GO:0140374	antiviral innate immune response	9	23	2.9e-07	2.088e-05	0.00050112	0.00025056	1
GO:0034341	response to type II interferon	12	46	4e-07	2.7648e-05	0.0006912	0.131594	1
GO:0034097	response to cytokine	31	297	4.4e-07	2.92431e-05	0.00076032	1	1
GO:1901652	response to peptide	31	301	6.2e-07	3.968e-05	0.00107136	1	1
GO:0045088	regulation of innate immune response	20	142	1.6e-06	9.53379e-05	0.0027648	1	1
GO:0050792	regulation of viral process	12	53	2.1e-06	0.00012096	0.0036288	1	1
GO:0045089	positive regulation of innate immune response	18	122	3.2e-06	0.000178374	0.0055296	1	1
GO:0060759	regulation of response to cytokine stimulus	12	56	4e-06	0.000216	0.006912	1	1
GO:0035458	cellular response to interferon-beta	7	17	4.7e-06	0.000238871	0.0081216	0.0020304	1
GO:0002833	positive regulation of response to biotic stimulus	18	128	6.7e-06	0.000330789	0.0115776	1	1
GO:0032101	regulation of response to external stimulus	28	283	9.1e-06	0.0004368	0.0157248	1	1
GO:0031347	regulation of defense response	25	234	9.8e-06	0.000457686	0.0169344	1	1
GO:0032103	positive regulation of response to external stimulus	23	205	1.2e-05	0.000545684	0.020736	1	1
GO:1903900	regulation of viral life cycle	10	44	1.7e-05	0.000753231	0.029376	1	1
GO:0002218	activation of innate immune response	15	99	2e-05	0.000864	0.03456	0.571104	1
GO:0016032	viral process	13	77	2.5e-05	0.00105366	0.0432	1	1
GO:0031349	positive regulation of defense response	20	169	2.7e-05	0.00111086	0.046656	1	1
GO:0002682	regulation of immune system process	34	415	3.6e-05	0.0014467	0.062208	1	1
GO:0019058	viral life cycle	11	58	3.8e-05	0.00149236	0.065664	1	1
GO:0019221	cytokine-mediated signaling pathway	21	188	3.9e-05	0.0014976	0.067392	1	1
GO:0071345	cellular response to cytokine stimulus	25	259	6.6e-05	0.002376	0.114048	1	1
GO:0060338	regulation of type I interferon-mediated signaling pathway	6	17	6.9e-05	0.00243331	0.119232	1	1
GO:0050776	regulation of immune response	26	278	7.5e-05	0.002592	0.1296	1	1
GO:0001959	regulation of cytokine-mediated signaling pathway	10	52	8e-05	0.00271059	0.13824	1	1
GO:0002221	pattern recognition receptor signaling pathway	13	87	9.6e-05	0.00319015	0.165888	1	1
GO:0071346	cellular response to type II interferon	8	34	0.0001	0.00326038	0.1728	0.197486	1
GO:0032606	type I interferon production	10	55	0.00013	0.00416	0.22464	1	1
GO:0002758	innate immune response-activating signaling pathway	13	91	0.00016	0.00493714	0.27648	1	1
GO:0002832	negative regulation of response to biotic stimulus	8	36	0.00016	0.00493714	0.27648	1	1
GO:0019882	antigen processing and presentation	9	46	0.00017	0.00515368	0.29376	1	1
GO:0072677	eosinophil migration	5	13	0.00019	0.005472	0.32832	1	1
GO:0002684	positive regulation of immune system process	28	333	0.00025	0.00708197	0.432	1	1
GO:0032481	positive regulation of type I interferon production	8	40	0.00034	0.00918	0.58752	1	1
GO:0050778	positive regulation of immune response	22	236	0.00042	0.0111655	0.72576	1	1
GO:0042742	defense response to bacterium	11	75	0.00044	0.01128	0.76032	0.0738327	1
GO:0002483	antigen processing and presentation of endogenous peptide antigen	4	9	0.00047	0.01128	0.81216	1	1
GO:0019885	antigen processing and presentation of endogenous peptide antigen via MHC class I	4	9	0.00047	0.01128	0.81216	0.832261	1
GO:0060339	negative regulation of type I interferon-mediated signaling pathway	4	9	0.00047	0.01128	0.81216	0.0738327	1
GO:0032608	interferon-beta production	7	32	0.00047	0.01128	0.81216	1	1
GO:0032648	regulation of interferon-beta production	7	32	0.00047	0.01128	0.81216	1	1
GO:0002474	antigen processing and presentation of peptide antigen via MHC class I	5	16	0.00057	0.0131328	0.98496	1	1
GO:0050691	regulation of defense response to virus by host	5	16	0.00057	0.0131328	0.98496	1	1
GO:0032479	regulation of type I interferon production	9	54	0.0006	0.0134649	1	1	1
GO:0019883	antigen processing and presentation of endogenous antigen	4	10	0.00075	0.0166154	1	1	1
GO:0001906	cell killing	11	83	0.00108	0.023328	1	1	1
GO:0061844	antimicrobial humoral immune response mediated by antimicrobial peptide	6	27	0.00114	0.0240234	1	0.140709	1
GO:0006950	response to stress	43	687	0.00122	0.0250971	1	1	1
GO:0080134	regulation of response to stress	26	326	0.00128	0.0260216	1	1	1
GO:0048247	lymphocyte chemotaxis	5	19	0.00136	0.0273265	1	1	1
GO:1990868	response to chemokine	7	38	0.00142	0.0278836	1	1	1
GO:1990869	cellular response to chemokine	7	38	0.00142	0.0278836	1	1	1
GO:0045824	negative regulation of innate immune response	6	29	0.00171	0.0332009	1	1	1
GO:0050729	positive regulation of inflammatory response	9	64	0.00215	0.0381888	1	0.832261	1
GO:0060330	regulation of response to type II interferon	2	2	0.00219	0.0381888	1	1	1
GO:0060332	positive regulation of response to type II interferon	2	2	0.00219	0.0381888	1	1	1
GO:0060334	regulation of type II interferon-mediated signaling pathway	2	2	0.00219	0.0381888	1	1	1
GO:0060335	positive regulation of type II interferon-mediated signaling pathway	2	2	0.00219	0.0381888	1	0.197486	1
GO:0002703	regulation of leukocyte mediated immunity	12	104	0.0022	0.0381888	1	1	1
GO:0002548	monocyte chemotaxis	5	21	0.00221	0.0381888	1	1	1
GO:0050688	regulation of defense response to virus	5	21	0.00221	0.0381888	1	1	1
GO:0002704	negative regulation of leukocyte mediated immunity	6	31	0.00246	0.0416753	1	1	1
GO:0001960	negative regulation of cytokine-mediated signaling pathway	5	22	0.00276	0.0458585	1	1	1
GO:0060761	negative regulation of response to cytokine stimulus	5	22	0.00276	0.0458585	1	1	1
GO:0048002	antigen processing and presentation of peptide antigen	6	32	0.00291	0.0478903	1	1	1
GO:0001794	type IIa hypersensitivity	3	7	0.00304	0.04864	1	1	1
GO:0002445	type II hypersensitivity	3	7	0.00304	0.04864	1	1	1
GO:0062207	regulation of pattern recognition receptor signaling pathway	7	44	0.00345	0.0546936	1	1	1
GO:0001909	leukocyte mediated cytotoxicity	8	56	0.00352	0.055296	1	1	1
GO:0002764	immune response-regulating signaling pathway	15	157	0.00398	0.0619589	1	1	1
GO:0090025	regulation of monocyte chemotaxis	4	15	0.0041	0.0626973	1	1	1
GO:0002428	antigen processing and presentation of peptide antigen via MHC class Ib	3	8	0.0047	0.0688271	1	1	1
GO:0002475	antigen processing and presentation via MHC class Ib	3	8	0.0047	0.0688271	1	1	1
GO:0002476	antigen processing and presentation of endogenous peptide antigen via MHC class Ib	3	8	0.0047	0.0688271	1	0.324864	1
GO:0002484	antigen processing and presentation of endogenous peptide antigen via MHC class I via ER pathway	3	8	0.0047	0.0688271	1	1	1
GO:0035457	cellular response to interferon-alpha	3	8	0.0047	0.0688271	1	0.324864	1
GO:0050777	negative regulation of immune response	8	59	0.00492	0.0714434	1	1	1
GO:0002253	activation of immune response	15	161	0.00512	0.0735471	1	1	1
GO:0032607	interferon-alpha production	4	16	0.00528	0.0741776	1	1	1
GO:0032647	regulation of interferon-alpha production	4	16	0.00528	0.0741776	1	1	1
GO:0035684	helper T cell extravasation	2	3	0.00636	0.0845391	1	1	1
GO:0002683	negative regulation of immune system process	13	134	0.00681	0.0886087	1	1	1
GO:0060333	type II interferon-mediated signaling pathway	3	9	0.00682	0.0886087	1	1	1
GO:0030522	intracellular receptor signaling pathway	10	91	0.00776	0.100069	1	1	1
GO:0001819	positive regulation of cytokine production	16	185	0.00794	0.101632	1	1	1
GO:0001910	regulation of leukocyte mediated cytotoxicity	6	39	0.00812	0.102419	1	1	1
GO:0002709	regulation of T cell mediated immunity	6	39	0.00812	0.102419	1	1	1
GO:0140894	endolysosomal toll-like receptor signaling pathway	4	18	0.00827	0.103307	1	1	1
GO:0002443	leukocyte mediated immunity	14	153	0.00831	0.103307	1	1	1
GO:0071219	cellular response to molecule of bacterial origin	10	92	0.00839	0.103557	1	1	1
GO:0002697	regulation of immune effector process	14	154	0.00881	0.107969	1	1	1
GO:0002524	hypersensitivity	3	10	0.00942	0.11383	1	1	1
GO:1901623	regulation of lymphocyte chemotaxis	3	10	0.00942	0.11383	1	1	1
GO:0001817	regulation of cytokine production	19	245	0.01181	0.135216	1	1	1
GO:0072678	T cell migration	4	20	0.01221	0.135216	1	1	1
GO:0002252	immune effector process	18	228	0.01222	0.135216	1	1	1
GO:0010819	regulation of T cell chemotaxis	2	4	0.01234	0.135216	1	0.554732	1
GO:0019835	cytolysis	2	4	0.01234	0.135216	1	1	1
GO:0034154	toll-like receptor 7 signaling pathway	2	4	0.01234	0.135216	1	1	1
GO:0071612	IP-10 production	2	4	0.01234	0.135216	1	1	1
GO:0071658	regulation of IP-10 production	2	4	0.01234	0.135216	1	1	1
GO:0140639	positive regulation of pyroptotic inflammatory response	2	4	0.01234	0.135216	1	0.554732	1
GO:0002438	acute inflammatory response to antigenic stimulus	3	11	0.01252	0.135216	1	1	1
GO:0060340	positive regulation of type I interferon-mediated signaling pathway	3	11	0.01252	0.135216	1	0.554732	1
GO:0072567	chemokine (C-X-C motif) ligand 2 production	3	11	0.01252	0.135216	1	1	1
GO:2000341	regulation of chemokine (C-X-C motif) ligand 2 production	3	11	0.01252	0.135216	1	1	1
GO:0002757	immune response-activating signaling pathway	13	145	0.0133	0.142748	1	1	1
GO:1903555	regulation of tumor necrosis factor superfamily cytokine production	9	85	0.0148	0.156898	1	1	1
GO:0001816	cytokine production	20	271	0.01656	0.173214	1	1	1
GO:0050727	regulation of inflammatory response	11	117	0.01665	0.173214	1	1	1
GO:0072676	lymphocyte migration	5	33	0.01674	0.173214	1	1	1
GO:0002711	positive regulation of T cell mediated immunity	4	22	0.01719	0.175765	1	1	1
GO:0019884	antigen processing and presentation of exogenous antigen	4	22	0.01719	0.175765	1	1	1
GO:0006959	humoral immune response	7	59	0.01766	0.179509	1	1	1
GO:0031341	regulation of cell killing	6	46	0.01806	0.182501	1	1	1
GO:0071706	tumor necrosis factor superfamily cytokine production	9	88	0.01837	0.184554	1	1	1
GO:0002706	regulation of lymphocyte mediated immunity	8	74	0.0192	0.18745	1	1	1
GO:0001796	regulation of type IIa hypersensitivity	2	5	0.01995	0.18745	1	1	1
GO:0002835	negative regulation of response to tumor cell	2	5	0.01995	0.18745	1	1	1
GO:0002838	negative regulation of immune response to tumor cell	2	5	0.01995	0.18745	1	1	1
GO:0002892	regulation of type II hypersensitivity	2	5	0.01995	0.18745	1	1	1
GO:0002894	positive regulation of type II hypersensitivity	2	5	0.01995	0.18745	1	1	1
GO:0035561	regulation of chromatin binding	2	5	0.01995	0.18745	1	1	1
GO:0035747	natural killer cell chemotaxis	2	5	0.01995	0.18745	1	1	1
GO:0140970	AIM2 inflammasome complex assembly	2	5	0.01995	0.18745	1	0.801712	1
GO:0002456	T cell mediated immunity	6	47	0.01996	0.18745	1	1	1
GO:0002707	negative regulation of lymphocyte mediated immunity	4	23	0.02009	0.187651	1	1	1
GO:0001911	negative regulation of leukocyte mediated cytotoxicity	3	13	0.0203	0.188594	1	1	1
GO:0071216	cellular response to biotic stimulus	10	105	0.02074	0.191651	1	1	1
GO:0002705	positive regulation of leukocyte mediated immunity	7	63	0.02473	0.225997	1	1	1
GO:0002675	positive regulation of acute inflammatory response	3	14	0.02498	0.225997	1	1	1
GO:0002888	positive regulation of myeloid leukocyte mediated immunity	3	14	0.02498	0.225997	1	1	1
GO:0070230	positive regulation of lymphocyte apoptotic process	3	14	0.02498	0.225997	1	1	1
GO:0002698	negative regulation of immune effector process	6	50	0.02647	0.23823	1	1	1
GO:0032496	response to lipopolysaccharide	11	126	0.02792	0.24343	1	1	1
GO:0032760	positive regulation of tumor necrosis factor production	7	65	0.02891	0.24343	1	0.832261	1
GO:1903557	positive regulation of tumor necrosis factor superfamily cytokine production	7	65	0.02891	0.24343	1	1	1
GO:0002424	T cell mediated immune response to tumor cell	2	6	0.02902	0.24343	1	1	1
GO:0002840	regulation of T cell mediated immune response to tumor cell	2	6	0.02902	0.24343	1	1	1
GO:0016540	protein autoprocessing	2	6	0.02902	0.24343	1	0.832261	1
GO:0034162	toll-like receptor 9 signaling pathway	2	6	0.02902	0.24343	1	0.832261	1
GO:0038094	Fc-gamma receptor signaling pathway	2	6	0.02902	0.24343	1	0.832261	1
GO:0039529	RIG-I signaling pathway	2	6	0.02902	0.24343	1	0.832261	1
GO:0042590	antigen processing and presentation of exogenous peptide antigen via MHC class I	2	6	0.02902	0.24343	1	0.832261	1
GO:0043129	surfactant homeostasis	2	6	0.02902	0.24343	1	0.832261	1
GO:0043615	astrocyte cell migration	2	6	0.02902	0.24343	1	0.832261	1
GO:0072683	T cell extravasation	2	6	0.02902	0.24343	1	1	1
GO:1901857	positive regulation of cellular respiration	2	6	0.02902	0.24343	1	0.832261	1
GO:0031342	negative regulation of cell killing	3	15	0.0302	0.252104	1	1	1
GO:0031348	negative regulation of defense response	7	67	0.03355	0.277389	1	1	1
GO:0034612	response to tumor necrosis factor	7	67	0.03355	0.277389	1	0.832261	1
GO:0002449	lymphocyte mediated immunity	10	114	0.03503	0.279321	1	1	1
GO:0001914	regulation of T cell mediated cytotoxicity	3	16	0.03596	0.279321	1	1	1
GO:0008347	glial cell migration	3	16	0.03596	0.279321	1	1	1
GO:0019083	viral transcription	3	16	0.03596	0.279321	1	1	1
GO:0043330	response to exogenous dsRNA	3	16	0.03596	0.279321	1	1	1
GO:1905523	positive regulation of macrophage migration	3	16	0.03596	0.279321	1	0.832261	1
GO:0002720	positive regulation of cytokine production involved in immune response	5	40	0.0361	0.279321	1	0.832261	1
GO:0032680	regulation of tumor necrosis factor production	8	84	0.03837	0.279321	1	1	1
GO:0001912	positive regulation of leukocyte mediated cytotoxicity	4	28	0.039	0.279321	1	1	1
GO:0002886	regulation of myeloid leukocyte mediated immunity	4	28	0.039	0.279321	1	1	1
GO:0034142	toll-like receptor 4 signaling pathway	4	28	0.039	0.279321	1	0.832261	1
GO:1905517	macrophage migration	4	28	0.039	0.279321	1	1	1
GO:0002544	chronic inflammatory response	2	7	0.03942	0.279321	1	1	1
GO:0002866	positive regulation of acute inflammatory response to antigenic stimulus	2	7	0.03942	0.279321	1	1	1
GO:0002885	positive regulation of hypersensitivity	2	7	0.03942	0.279321	1	1	1
GO:0032682	negative regulation of chemokine production	2	7	0.03942	0.279321	1	1	1
GO:0046782	regulation of viral transcription	2	7	0.03942	0.279321	1	1	1
GO:0071360	cellular response to exogenous dsRNA	2	7	0.03942	0.279321	1	0.832261	1
GO:2001185	regulation of CD8-positive, alpha-beta T cell activation	2	7	0.03942	0.279321	1	0.832261	1
GO:0071621	granulocyte chemotaxis	6	55	0.04026	0.279321	1	1	1
GO:0030595	leukocyte chemotaxis	8	86	0.04338	0.279321	1	1	1
GO:0002444	myeloid leukocyte mediated immunity	5	42	0.04345	0.279321	1	1	1
GO:0032102	negative regulation of response to external stimulus	8	87	0.04604	0.279321	1	1	1
GO:0032640	tumor necrosis factor production	8	87	0.04604	0.279321	1	1	1
GO:0002237	response to molecule of bacterial origin	11	136	0.04613	0.279321	1	1	1
GO:0044403	biological process involved in symbiotic interaction	6	57	0.04687	0.279321	1	1	1
GO:0001813	regulation of antibody-dependent cellular cytotoxicity	1	1	0.0472	0.279321	1	1	1
GO:0001815	positive regulation of antibody-dependent cellular cytotoxicity	1	1	0.0472	0.279321	1	0.832261	1
GO:0002545	chronic inflammatory response to non-antigenic stimulus	1	1	0.0472	0.279321	1	1	1
GO:0002584	negative regulation of antigen processing and presentation of peptide antigen	1	1	0.0472	0.279321	1	1	1
GO:0002587	negative regulation of antigen processing and presentation of peptide antigen via MHC class II	1	1	0.0472	0.279321	1	0.832261	1
GO:0002677	negative regulation of chronic inflammatory response	1	1	0.0472	0.279321	1	1	1
GO:0002736	regulation of plasmacytoid dendritic cell cytokine production	1	1	0.0472	0.279321	1	1	1
GO:0002737	negative regulation of plasmacytoid dendritic cell cytokine production	1	1	0.0472	0.279321	1	0.832261	1
GO:0002880	regulation of chronic inflammatory response to non-antigenic stimulus	1	1	0.0472	0.279321	1	1	1
GO:0002881	negative regulation of chronic inflammatory response to non-antigenic stimulus	1	1	0.0472	0.279321	1	0.832261	1
GO:0009597	detection of virus	1	1	0.0472	0.279321	1	0.832261	1
GO:0016075	rRNA catabolic process	1	1	0.0472	0.279321	1	0.832261	1
GO:0016078	tRNA decay	1	1	0.0472	0.279321	1	0.832261	1
GO:0031584	activation of phospholipase D activity	1	1	0.0472	0.279321	1	0.832261	1
GO:0032459	regulation of protein oligomerization	1	1	0.0472	0.279321	1	1	1
GO:0032461	positive regulation of protein oligomerization	1	1	0.0472	0.279321	1	0.832261	1
GO:0032639	TRAIL production	1	1	0.0472	0.279321	1	1	1
GO:0032679	regulation of TRAIL production	1	1	0.0472	0.279321	1	1	1
GO:0032759	positive regulation of TRAIL production	1	1	0.0472	0.279321	1	0.832261	1
GO:0033552	response to vitamin B3	1	1	0.0472	0.279321	1	0.832261	1
GO:0034123	positive regulation of toll-like receptor signaling pathway	1	1	0.0472	0.279321	1	0.832261	1
GO:0034127	regulation of MyD88-independent toll-like receptor signaling pathway	1	1	0.0472	0.279321	1	0.832261	1
GO:0034155	regulation of toll-like receptor 7 signaling pathway	1	1	0.0472	0.279321	1	1	1
GO:0034157	positive regulation of toll-like receptor 7 signaling pathway	1	1	0.0472	0.279321	1	0.832261	1
GO:0034240	negative regulation of macrophage fusion	1	1	0.0472	0.279321	1	0.832261	1
GO:0035687	T-helper 1 cell extravasation	1	1	0.0472	0.279321	1	1	1
GO:0035688	T-helper 1 cell diapedesis	1	1	0.0472	0.279321	1	0.832261	1
GO:0035689	chemokine (C-C motif) ligand 5 signaling pathway	1	1	0.0472	0.279321	1	0.832261	1
GO:0035944	perforin production	1	1	0.0472	0.279321	1	0.832261	1
GO:0046719	regulation by virus of viral protein levels in host cell	1	1	0.0472	0.279321	1	1	1
GO:0046725	negative regulation by virus of viral protein levels in host cell	1	1	0.0472	0.279321	1	0.832261	1
GO:0060137	maternal process involved in parturition	1	1	0.0472	0.279321	1	0.832261	1
GO:0071403	cellular response to high density lipoprotein particle stimulus	1	1	0.0472	0.279321	1	0.832261	1
GO:0072135	kidney mesenchymal cell proliferation	1	1	0.0472	0.279321	1	1	1
GO:0072136	metanephric mesenchymal cell proliferation involved in metanephros development	1	1	0.0472	0.279321	1	0.832261	1
GO:0072161	mesenchymal cell differentiation involved in kidney development	1	1	0.0472	0.279321	1	1	1
GO:0072162	metanephric mesenchymal cell differentiation	1	1	0.0472	0.279321	1	0.832261	1
GO:0072183	negative regulation of nephron tubule epithelial cell differentiation	1	1	0.0472	0.279321	1	1	1
GO:0072308	negative regulation of metanephric nephron tubule epithelial cell differentiation	1	1	0.0472	0.279321	1	0.832261	1
GO:0075733	intracellular transport of virus	1	1	0.0472	0.279321	1	1	1
GO:0090185	negative regulation of kidney development	1	1	0.0472	0.279321	1	1	1
GO:0141201	pyroptotic cell death	1	1	0.0472	0.279321	1	0.832261	1
GO:0150089	multiple spine synapse organization	1	1	0.0472	0.279321	1	1	1
GO:0150090	multiple spine synapse organization, single dendrite	1	1	0.0472	0.279321	1	0.832261	1
GO:0160075	non-canonical inflammasome complex assembly	1	1	0.0472	0.279321	1	0.832261	1
GO:1901252	regulation of intracellular transport of viral material	1	1	0.0472	0.279321	1	1	1
GO:1901253	negative regulation of intracellular transport of viral material	1	1	0.0472	0.279321	1	0.832261	1
GO:1902482	regulatory T cell apoptotic process	1	1	0.0472	0.279321	1	0.832261	1
GO:1904150	negative regulation of microglial cell mediated cytotoxicity	1	1	0.0472	0.279321	1	0.832261	1
GO:1905237	response to cyclosporin A	1	1	0.0472	0.279321	1	0.832261	1
GO:1905397	activated CD8-positive, alpha-beta T cell apoptotic process	1	1	0.0472	0.279321	1	1	1
GO:1905402	regulation of activated CD8-positive, alpha-beta T cell apoptotic process	1	1	0.0472	0.279321	1	1	1
GO:1905404	positive regulation of activated CD8-positive, alpha-beta T cell apoptotic process	1	1	0.0472	0.279321	1	0.832261	1
GO:2000492	regulation of interleukin-18-mediated signaling pathway	1	1	0.0472	0.279321	1	1	1
GO:2000494	positive regulation of interleukin-18-mediated signaling pathway	1	1	0.0472	0.279321	1	0.832261	1
GO:2000502	negative regulation of natural killer cell chemotaxis	1	1	0.0472	0.279321	1	0.832261	1
GO:2001012	mesenchymal cell differentiation involved in renal system development	1	1	0.0472	0.279321	1	1	1
GO:0039531	regulation of cytoplasmic pattern recognition receptor signaling pathway	4	30	0.04869	0.287141	1	1	1
GO:0001913	T cell mediated cytotoxicity	3	18	0.04902	0.287141	1	1	1
GO:0002673	regulation of acute inflammatory response	3	18	0.04902	0.287141	1	1	1
GO:0002418	immune response to tumor cell	2	8	0.05099	0.291757	1	1	1
GO:0002756	MyD88-independent toll-like receptor signaling pathway	2	8	0.05099	0.291757	1	1	1
GO:0002837	regulation of immune response to tumor cell	2	8	0.05099	0.291757	1	1	1
GO:0032069	regulation of nuclease activity	2	8	0.05099	0.291757	1	1	1
GO:0034121	regulation of toll-like receptor signaling pathway	2	8	0.05099	0.291757	1	1	1
GO:0038093	Fc receptor signaling pathway	2	8	0.05099	0.291757	1	1	1
GO:0071639	positive regulation of monocyte chemotactic protein-1 production	2	8	0.05099	0.291757	1	0.890007	1
GO:0002819	regulation of adaptive immune response	8	89	0.05168	0.29473	1	1	1
GO:0006954	inflammatory response	17	246	0.05227	0.297114	1	1	1
GO:0050896	response to stimulus	50	970	0.05355	0.303391	1	1	1
GO:0050830	defense response to Gram-positive bacterium	4	31	0.054	0.304623	1	0.93312	1
GO:0002718	regulation of cytokine production involved in immune response	6	59	0.05412	0.304623	1	1	1
GO:0019080	viral gene expression	3	19	0.05632	0.314955	1	1	1
GO:0051851	modulation by host of symbiont process	3	19	0.05632	0.314955	1	0.963574	1
GO:0002699	positive regulation of immune effector process	9	107	0.05697	0.317562	1	1	1
GO:0140895	cell surface toll-like receptor signaling pathway	4	32	0.05961	0.331209	1	1	1
GO:0002688	regulation of leukocyte chemotaxis	5	46	0.06071	0.33624	1	1	1
GO:0071356	cellular response to tumor necrosis factor	6	61	0.06203	0.34136	1	1	1
GO:0001562	response to protozoan	2	9	0.06361	0.34136	1	1	1
GO:0002716	negative regulation of natural killer cell mediated immunity	2	9	0.06361	0.34136	1	1	1
GO:0002834	regulation of response to tumor cell	2	9	0.06361	0.34136	1	1	1
GO:0002883	regulation of hypersensitivity	2	9	0.06361	0.34136	1	1	1
GO:0036037	CD8-positive, alpha-beta T cell activation	2	9	0.06361	0.34136	1	1	1
GO:0042832	defense response to protozoan	2	9	0.06361	0.34136	1	1	1
GO:0045953	negative regulation of natural killer cell mediated cytotoxicity	2	9	0.06361	0.34136	1	1	1
GO:0071605	monocyte chemotactic protein-1 production	2	9	0.06361	0.34136	1	1	1
GO:0071637	regulation of monocyte chemotactic protein-1 production	2	9	0.06361	0.34136	1	1	1
GO:0043331	response to dsRNA	3	20	0.0641	0.341867	1	1	1
GO:0048246	macrophage chemotaxis	3	20	0.0641	0.341867	1	1	1
GO:0002526	acute inflammatory response	4	33	0.06552	0.346234	1	1	1
GO:0002752	cell surface pattern recognition receptor signaling pathway	4	33	0.06552	0.346234	1	1	1
GO:0031343	positive regulation of cell killing	4	33	0.06552	0.346234	1	1	1
GO:0002250	adaptive immune response	12	162	0.06701	0.353028	1	1	1
GO:0000768	syncytium formation by plasma membrane fusion	3	21	0.07236	0.377759	1	1	1
GO:0006949	syncytium formation	3	21	0.07236	0.377759	1	1	1
GO:0140253	cell-cell fusion	3	21	0.07236	0.377759	1	1	1
GO:0097530	granulocyte migration	6	64	0.07513	0.391038	1	1	1
GO:0002460	adaptive immune response based on somatic recombination of immune receptors built from immunoglobulin superfamily domains	10	130	0.0756	0.392303	1	1	1
GO:0002864	regulation of acute inflammatory response to antigenic stimulus	2	10	0.07716	0.395645	1	1	1
GO:0045648	positive regulation of erythrocyte differentiation	2	10	0.07716	0.395645	1	1	1
GO:0046825	regulation of protein export from nucleus	2	10	0.07716	0.395645	1	1	1
GO:0071359	cellular response to dsRNA	2	10	0.07716	0.395645	1	1	1
GO:0098586	cellular response to virus	3	22	0.08107	0.408517	1	1	1
GO:2000401	regulation of lymphocyte migration	3	22	0.08107	0.408517	1	1	1
GO:0071396	cellular response to lipid	10	133	0.08564	0.408517	1	1	1
GO:0002708	positive regulation of lymphocyte mediated immunity	5	51	0.0871	0.408517	1	1	1
GO:0002822	regulation of adaptive immune response based on somatic recombination of immune receptors built from immunoglobulin superfamily domains	7	83	0.08909	0.408517	1	1	1
GO:0070232	regulation of T cell apoptotic process	3	23	0.09022	0.408517	1	1	1
GO:1905521	regulation of macrophage migration	3	23	0.09022	0.408517	1	1	1
GO:2000108	positive regulation of leukocyte apoptotic process	3	23	0.09022	0.408517	1	1	1
GO:0034138	toll-like receptor 3 signaling pathway	2	11	0.09152	0.408517	1	1	1
GO:0043457	regulation of cellular respiration	2	11	0.09152	0.408517	1	1	1
GO:0045662	negative regulation of myoblast differentiation	2	11	0.09152	0.408517	1	1	1
GO:0140962	multicellular organismal-level chemical homeostasis	2	11	0.09152	0.408517	1	1	1
GO:0141087	positive regulation of inflammasome-mediated signaling pathway	2	11	0.09152	0.408517	1	1	1
GO:2000406	positive regulation of T cell migration	2	11	0.09152	0.408517	1	1	1
GO:0002370	natural killer cell cytokine production	1	2	0.0922	0.408517	1	1	1
GO:0002373	plasmacytoid dendritic cell cytokine production	1	2	0.0922	0.408517	1	1	1
GO:0002488	antigen processing and presentation of endogenous peptide antigen via MHC class Ib via ER pathway	1	2	0.0922	0.408517	1	1	1
GO:0002489	antigen processing and presentation of endogenous peptide antigen via MHC class Ib via ER pathway, TAP-dependent	1	2	0.0922	0.408517	1	1	1
GO:0002519	natural killer cell tolerance induction	1	2	0.0922	0.408517	1	1	1
GO:0002581	negative regulation of antigen processing and presentation of peptide or polysaccharide antigen via MHC class II	1	2	0.0922	0.408517	1	1	1
GO:0002644	negative regulation of tolerance induction	1	2	0.0922	0.408517	1	1	1
GO:0002727	regulation of natural killer cell cytokine production	1	2	0.0922	0.408517	1	1	1
GO:0002729	positive regulation of natural killer cell cytokine production	1	2	0.0922	0.408517	1	1	1
GO:0002731	negative regulation of dendritic cell cytokine production	1	2	0.0922	0.408517	1	1	1
GO:0003340	negative regulation of mesenchymal to epithelial transition involved in metanephros morphogenesis	1	2	0.0922	0.408517	1	1	1
GO:0006399	tRNA metabolic process	1	2	0.0922	0.408517	1	1	1
GO:0007567	parturition	1	2	0.0922	0.408517	1	1	1
GO:0010518	positive regulation of phospholipase activity	1	2	0.0922	0.408517	1	1	1
GO:0021626	central nervous system maturation	1	2	0.0922	0.408517	1	1	1
GO:0035685	helper T cell diapedesis	1	2	0.0922	0.408517	1	1	1
GO:0044828	negative regulation by host of viral genome replication	1	2	0.0922	0.408517	1	1	1
GO:0045341	MHC class I biosynthetic process	1	2	0.0922	0.408517	1	1	1
GO:0045343	regulation of MHC class I biosynthetic process	1	2	0.0922	0.408517	1	1	1
GO:0045345	positive regulation of MHC class I biosynthetic process	1	2	0.0922	0.408517	1	1	1
GO:0046010	positive regulation of circadian sleep/wake cycle, non-REM sleep	1	2	0.0922	0.408517	1	1	1
GO:0046794	transport of virus	1	2	0.0922	0.408517	1	1	1
GO:0046967	cytosol to endoplasmic reticulum transport	1	2	0.0922	0.408517	1	1	1
GO:0060754	positive regulation of mast cell chemotaxis	1	2	0.0922	0.408517	1	1	1
GO:0070100	negative regulation of chemokine-mediated signaling pathway	1	2	0.0922	0.408517	1	1	1
GO:0072257	metanephric nephron tubule epithelial cell differentiation	1	2	0.0922	0.408517	1	1	1
GO:0072307	regulation of metanephric nephron tubule epithelial cell differentiation	1	2	0.0922	0.408517	1	1	1
GO:0140447	cytokine precursor processing	1	2	0.0922	0.408517	1	1	1
GO:0140973	positive regulation of AIM2 inflammasome complex assembly	1	2	0.0922	0.408517	1	1	1
GO:0160006	Fc receptor-mediated immune complex endocytosis	1	2	0.0922	0.408517	1	1	1
GO:1900246	positive regulation of RIG-I signaling pathway	1	2	0.0922	0.408517	1	1	1
GO:1901624	negative regulation of lymphocyte chemotaxis	1	2	0.0922	0.408517	1	1	1
GO:1901740	negative regulation of myoblast fusion	1	2	0.0922	0.408517	1	1	1
GO:1902044	regulation of Fas signaling pathway	1	2	0.0922	0.408517	1	1	1
GO:1903487	regulation of lactation	1	2	0.0922	0.408517	1	1	1
GO:1904783	positive regulation of NMDA glutamate receptor activity	1	2	0.0922	0.408517	1	1	1
GO:2000566	positive regulation of CD8-positive, alpha-beta T cell proliferation	1	2	0.0922	0.408517	1	1	1
GO:2000646	positive regulation of receptor catabolic process	1	2	0.0922	0.408517	1	1	1
GO:2001186	negative regulation of CD8-positive, alpha-beta T cell activation	1	2	0.0922	0.408517	1	1	1
GO:0002220	innate immune response activating cell surface receptor signaling pathway	4	38	0.09947	0.439601	1	1	1
GO:0019941	modification-dependent protein catabolic process	5	54	0.10544	0.462783	1	1	1
GO:0043632	modification-dependent macromolecule catabolic process	5	54	0.10544	0.462783	1	1	1
GO:0002367	cytokine production involved in immune response	6	70	0.10581	0.462783	1	1	1
GO:0002863	positive regulation of inflammatory response to antigenic stimulus	2	12	0.10659	0.462783	1	1	1
GO:0010759	positive regulation of macrophage chemotaxis	2	12	0.10659	0.462783	1	1	1
GO:0033198	response to ATP	2	12	0.10659	0.462783	1	1	1
GO:0060142	regulation of syncytium formation by plasma membrane fusion	2	12	0.10659	0.462783	1	1	1
GO:0002824	positive regulation of adaptive immune response based on somatic recombination of immune receptors built from immunoglobulin superfamily domains	5	55	0.11196	0.483667	1	1	1
GO:0071675	regulation of mononuclear cell migration	5	55	0.11196	0.483667	1	1	1
GO:0060326	cell chemotaxis	8	105	0.11305	0.487158	1	1	1
GO:0002690	positive regulation of leukocyte chemotaxis	4	40	0.11499	0.493059	1	1	1
GO:0045639	positive regulation of myeloid cell differentiation	4	40	0.11499	0.493059	1	1	1
GO:0002437	inflammatory response to antigenic stimulus	3	26	0.12007	0.493464	1	1	1
GO:0045123	cellular extravasation	3	26	0.12007	0.493464	1	1	1
GO:0051702	biological process involved in interaction with symbiont	3	26	0.12007	0.493464	1	1	1
GO:0001937	negative regulation of endothelial cell proliferation	2	13	0.12228	0.493464	1	1	1
GO:0002347	response to tumor cell	2	13	0.12228	0.493464	1	1	1
GO:0002710	negative regulation of T cell mediated immunity	2	13	0.12228	0.493464	1	1	1
GO:0002730	regulation of dendritic cell cytokine production	2	13	0.12228	0.493464	1	1	1
GO:0006611	protein export from nucleus	2	13	0.12228	0.493464	1	1	1
GO:2000404	regulation of T cell migration	2	13	0.12228	0.493464	1	1	1
GO:0002702	positive regulation of production of molecular mediator of immune response	5	57	0.12558	0.493464	1	1	1
GO:0042267	natural killer cell mediated cytotoxicity	3	27	0.13075	0.493464	1	1	1
GO:0046683	response to organophosphorus	3	27	0.13075	0.493464	1	1	1
GO:0051259	protein complex oligomerization	4	42	0.13152	0.493464	1	1	1
GO:0002372	myeloid dendritic cell cytokine production	1	3	0.13512	0.493464	1	1	1
GO:0002436	immune complex clearance by monocytes and macrophages	1	3	0.13512	0.493464	1	1	1
GO:0002477	antigen processing and presentation of exogenous peptide antigen via MHC class Ib	1	3	0.13512	0.493464	1	1	1
GO:0002586	regulation of antigen processing and presentation of peptide antigen via MHC class II	1	3	0.13512	0.493464	1	1	1
GO:0002733	regulation of myeloid dendritic cell cytokine production	1	3	0.13512	0.493464	1	1	1
GO:0002735	positive regulation of myeloid dendritic cell cytokine production	1	3	0.13512	0.493464	1	1	1
GO:0003337	mesenchymal to epithelial transition involved in metanephros morphogenesis	1	3	0.13512	0.493464	1	1	1
GO:0003339	regulation of mesenchymal to epithelial transition involved in metanephros morphogenesis	1	3	0.13512	0.493464	1	1	1
GO:0007231	osmosensory signaling pathway	1	3	0.13512	0.493464	1	1	1
GO:0010517	regulation of phospholipase activity	1	3	0.13512	0.493464	1	1	1
GO:0010820	positive regulation of T cell chemotaxis	1	3	0.13512	0.493464	1	1	1
GO:0031268	pseudopodium organization	1	3	0.13512	0.493464	1	1	1
GO:0031269	pseudopodium assembly	1	3	0.13512	0.493464	1	1	1
GO:0032815	negative regulation of natural killer cell activation	1	3	0.13512	0.493464	1	1	1
GO:0033632	regulation of cell-cell adhesion mediated by integrin	1	3	0.13512	0.493464	1	1	1
GO:0033634	positive regulation of cell-cell adhesion mediated by integrin	1	3	0.13512	0.493464	1	1	1
GO:0034124	regulation of MyD88-dependent toll-like receptor signaling pathway	1	3	0.13512	0.493464	1	1	1
GO:0034163	regulation of toll-like receptor 9 signaling pathway	1	3	0.13512	0.493464	1	1	1
GO:0034165	positive regulation of toll-like receptor 9 signaling pathway	1	3	0.13512	0.493464	1	1	1
GO:0034239	regulation of macrophage fusion	1	3	0.13512	0.493464	1	1	1
GO:0035697	CD8-positive, alpha-beta T cell extravasation	1	3	0.13512	0.493464	1	1	1
GO:0035702	monocyte homeostasis	1	3	0.13512	0.493464	1	1	1
GO:0035900	response to isolation stress	1	3	0.13512	0.493464	1	1	1
GO:0036337	Fas signaling pathway	1	3	0.13512	0.493464	1	1	1
GO:0038095	Fc-epsilon receptor signaling pathway	1	3	0.13512	0.493464	1	1	1
GO:0039530	MDA-5 signaling pathway	1	3	0.13512	0.493464	1	1	1
GO:0039535	regulation of RIG-I signaling pathway	1	3	0.13512	0.493464	1	1	1
GO:0042748	circadian sleep/wake cycle, non-REM sleep	1	3	0.13512	0.493464	1	1	1
GO:0044793	negative regulation by host of viral process	1	3	0.13512	0.493464	1	1	1
GO:0044827	modulation by host of viral genome replication	1	3	0.13512	0.493464	1	1	1
GO:0045188	regulation of circadian sleep/wake cycle, non-REM sleep	1	3	0.13512	0.493464	1	1	1
GO:0045938	positive regulation of circadian sleep/wake cycle, sleep	1	3	0.13512	0.493464	1	1	1
GO:0046826	negative regulation of protein export from nucleus	1	3	0.13512	0.493464	1	1	1
GO:0048874	host-mediated regulation of intestinal microbiota composition	1	3	0.13512	0.493464	1	1	1
GO:0050904	diapedesis	1	3	0.13512	0.493464	1	1	1
GO:0051457	maintenance of protein location in nucleus	1	3	0.13512	0.493464	1	1	1
GO:0060193	positive regulation of lipase activity	1	3	0.13512	0.493464	1	1	1
GO:0060753	regulation of mast cell chemotaxis	1	3	0.13512	0.493464	1	1	1
GO:0071392	cellular response to estradiol stimulus	1	3	0.13512	0.493464	1	1	1
GO:0072074	kidney mesenchyme development	1	3	0.13512	0.493464	1	1	1
GO:0072075	metanephric mesenchyme development	1	3	0.13512	0.493464	1	1	1
GO:0072170	metanephric tubule development	1	3	0.13512	0.493464	1	1	1
GO:0072202	cell differentiation involved in metanephros development	1	3	0.13512	0.493464	1	1	1
GO:0072203	cell proliferation involved in metanephros development	1	3	0.13512	0.493464	1	1	1
GO:0072207	metanephric epithelium development	1	3	0.13512	0.493464	1	1	1
GO:0072234	metanephric nephron tubule development	1	3	0.13512	0.493464	1	1	1
GO:0072243	metanephric nephron epithelium development	1	3	0.13512	0.493464	1	1	1
GO:0072283	metanephric renal vesicle morphogenesis	1	3	0.13512	0.493464	1	1	1
GO:0090264	regulation of immune complex clearance by monocytes and macrophages	1	3	0.13512	0.493464	1	1	1
GO:0090265	positive regulation of immune complex clearance by monocytes and macrophages	1	3	0.13512	0.493464	1	1	1
GO:0110091	negative regulation of hippocampal neuron apoptotic process	1	3	0.13512	0.493464	1	1	1
GO:0140971	regulation of AIM2 inflammasome complex assembly	1	3	0.13512	0.493464	1	1	1
GO:1903265	positive regulation of tumor necrosis factor-mediated signaling pathway	1	3	0.13512	0.493464	1	1	1
GO:1905563	negative regulation of vascular endothelial cell proliferation	1	3	0.13512	0.493464	1	1	1
GO:2000402	negative regulation of lymphocyte migration	1	3	0.13512	0.493464	1	1	1
GO:2000644	regulation of receptor catabolic process	1	3	0.13512	0.493464	1	1	1
GO:2000697	negative regulation of epithelial cell differentiation involved in kidney development	1	3	0.13512	0.493464	1	1	1
GO:0097529	myeloid leukocyte migration	7	92	0.13536	0.493464	1	1	1
GO:0045765	regulation of angiogenesis	6	75	0.13574	0.493808	1	1	1
GO:0002281	macrophage activation involved in immune response	2	14	0.1385	0.500686	1	1	1
GO:0002371	dendritic cell cytokine production	2	14	0.1385	0.500686	1	1	1
GO:0002507	tolerance induction	2	14	0.1385	0.500686	1	1	1
GO:0002228	natural killer cell mediated immunity	3	28	0.14177	0.507202	1	1	1
GO:0016525	negative regulation of angiogenesis	3	28	0.14177	0.507202	1	1	1
GO:0061081	positive regulation of myeloid leukocyte cytokine production involved in immune response	3	28	0.14177	0.507202	1	1	1
GO:1901343	negative regulation of vasculature development	3	28	0.14177	0.507202	1	1	1
GO:2000181	negative regulation of blood vessel morphogenesis	3	28	0.14177	0.507202	1	1	1
GO:0071674	mononuclear cell migration	6	76	0.14218	0.507618	1	1	1
GO:0002821	positive regulation of adaptive immune response	5	60	0.14739	0.524053	1	1	1
GO:0050920	regulation of chemotaxis	5	60	0.14739	0.524053	1	1	1
GO:0071677	positive regulation of mononuclear cell migration	4	44	0.14899	0.528654	1	1	1
GO:0007166	cell surface receptor signaling pathway	28	505	0.14987	0.530687	1	1	1
GO:0002224	toll-like receptor signaling pathway	3	29	0.15308	0.540617	1	1	1
GO:0007520	myoblast fusion	2	15	0.15516	0.540617	1	1	1
GO:0010758	regulation of macrophage chemotaxis	2	15	0.15516	0.540617	1	1	1
GO:0045646	regulation of erythrocyte differentiation	2	15	0.15516	0.540617	1	1	1
GO:0045672	positive regulation of osteoclast differentiation	2	15	0.15516	0.540617	1	1	1
GO:0051168	nuclear export	2	15	0.15516	0.540617	1	1	1
GO:0141085	regulation of inflammasome-mediated signaling pathway	2	15	0.15516	0.540617	1	1	1
GO:0002700	regulation of production of molecular mediator of immune response	6	78	0.15549	0.540617	1	1	1
GO:1901342	regulation of vasculature development	6	78	0.15549	0.540617	1	1	1
GO:0002687	positive regulation of leukocyte migration	5	62	0.1628	0.548671	1	1	1
GO:0031640	killing of cells of another organism	3	30	0.16468	0.548671	1	1	1
GO:0141061	disruption of cell in another organism	3	30	0.16468	0.548671	1	1	1
GO:0048583	regulation of response to stimulus	34	639	0.1713	0.548671	1	1	1
GO:0050832	defense response to fungus	2	16	0.17219	0.548671	1	1	1
GO:0050918	positive chemotaxis	2	16	0.17219	0.548671	1	1	1
GO:0051224	negative regulation of protein transport	2	16	0.17219	0.548671	1	1	1
GO:1903901	negative regulation of viral life cycle	2	16	0.17219	0.548671	1	1	1
GO:2000403	positive regulation of lymphocyte migration	2	16	0.17219	0.548671	1	1	1
GO:0001802	type III hypersensitivity	1	4	0.17605	0.548671	1	1	1
GO:0001803	regulation of type III hypersensitivity	1	4	0.17605	0.548671	1	1	1
GO:0001805	positive regulation of type III hypersensitivity	1	4	0.17605	0.548671	1	1	1
GO:0002434	immune complex clearance	1	4	0.17605	0.548671	1	1	1
GO:0002578	negative regulation of antigen processing and presentation	1	4	0.17605	0.548671	1	1	1
GO:0002580	regulation of antigen processing and presentation of peptide or polysaccharide antigen via MHC class II	1	4	0.17605	0.548671	1	1	1
GO:0002583	regulation of antigen processing and presentation of peptide antigen	1	4	0.17605	0.548671	1	1	1
GO:0002676	regulation of chronic inflammatory response	1	4	0.17605	0.548671	1	1	1
GO:0002689	negative regulation of leukocyte chemotaxis	1	4	0.17605	0.548671	1	1	1
GO:0003338	metanephros morphogenesis	1	4	0.17605	0.548671	1	1	1
GO:0032497	detection of lipopolysaccharide	1	4	0.17605	0.548671	1	1	1
GO:0032730	positive regulation of interleukin-1 alpha production	1	4	0.17605	0.548671	1	1	1
GO:0034122	negative regulation of toll-like receptor signaling pathway	1	4	0.17605	0.548671	1	1	1
GO:0035425	autocrine signaling	1	4	0.17605	0.548671	1	1	1
GO:0035634	response to stilbenoid	1	4	0.17605	0.548671	1	1	1
GO:0042118	endothelial cell activation	1	4	0.17605	0.548671	1	1	1
GO:0043320	natural killer cell degranulation	1	4	0.17605	0.548671	1	1	1
GO:0045187	regulation of circadian sleep/wake cycle, sleep	1	4	0.17605	0.548671	1	1	1
GO:0046642	negative regulation of alpha-beta T cell proliferation	1	4	0.17605	0.548671	1	1	1
GO:0050802	circadian sleep/wake cycle, sleep	1	4	0.17605	0.548671	1	1	1
GO:0051444	negative regulation of ubiquitin-protein transferase activity	1	4	0.17605	0.548671	1	1	1
GO:0060056	mammary gland involution	1	4	0.17605	0.548671	1	1	1
GO:0060081	membrane hyperpolarization	1	4	0.17605	0.548671	1	1	1
GO:0060231	mesenchymal to epithelial transition	1	4	0.17605	0.548671	1	1	1
GO:0060545	positive regulation of necroptotic process	1	4	0.17605	0.548671	1	1	1
GO:0070099	regulation of chemokine-mediated signaling pathway	1	4	0.17605	0.548671	1	1	1
GO:0071398	cellular response to fatty acid	1	4	0.17605	0.548671	1	1	1
GO:0072077	renal vesicle morphogenesis	1	4	0.17605	0.548671	1	1	1
GO:0072087	renal vesicle development	1	4	0.17605	0.548671	1	1	1
GO:0072182	regulation of nephron tubule epithelial cell differentiation	1	4	0.17605	0.548671	1	1	1
GO:0072273	metanephric nephron morphogenesis	1	4	0.17605	0.548671	1	1	1
GO:0090634	microglial cell mediated cytotoxicity	1	4	0.17605	0.548671	1	1	1
GO:0110089	regulation of hippocampal neuron apoptotic process	1	4	0.17605	0.548671	1	1	1
GO:1901509	regulation of endothelial tube morphogenesis	1	4	0.17605	0.548671	1	1	1
GO:1902946	protein localization to early endosome	1	4	0.17605	0.548671	1	1	1
GO:1902965	regulation of protein localization to early endosome	1	4	0.17605	0.548671	1	1	1
GO:1902966	positive regulation of protein localization to early endosome	1	4	0.17605	0.548671	1	1	1
GO:1904149	regulation of microglial cell mediated cytotoxicity	1	4	0.17605	0.548671	1	1	1
GO:1905666	regulation of protein localization to endosome	1	4	0.17605	0.548671	1	1	1
GO:1905668	positive regulation of protein localization to endosome	1	4	0.17605	0.548671	1	1	1
GO:2000110	negative regulation of macrophage apoptotic process	1	4	0.17605	0.548671	1	1	1
GO:2000503	positive regulation of natural killer cell chemotaxis	1	4	0.17605	0.548671	1	1	1
GO:2000551	regulation of T-helper 2 cell cytokine production	1	4	0.17605	0.548671	1	1	1
GO:2000553	positive regulation of T-helper 2 cell cytokine production	1	4	0.17605	0.548671	1	1	1
GO:2000562	negative regulation of CD4-positive, alpha-beta T cell proliferation	1	4	0.17605	0.548671	1	1	1
GO:2000564	regulation of CD8-positive, alpha-beta T cell proliferation	1	4	0.17605	0.548671	1	1	1
GO:2001187	positive regulation of CD8-positive, alpha-beta T cell activation	1	4	0.17605	0.548671	1	1	1
GO:0014074	response to purine-containing compound	3	31	0.17654	0.548671	1	1	1
GO:0070231	T cell apoptotic process	3	31	0.17654	0.548671	1	1	1
GO:0141060	disruption of anatomical structure in another organism	3	31	0.17654	0.548671	1	1	1
GO:0051701	biological process involved in interaction with host	3	32	0.18863	0.582723	1	1	1
GO:0071347	cellular response to interleukin-1	3	32	0.18863	0.582723	1	1	1
GO:0002861	regulation of inflammatory response to antigenic stimulus	2	17	0.18952	0.582723	1	1	1
GO:0031397	negative regulation of protein ubiquitination	2	17	0.18952	0.582723	1	1	1
GO:0032526	response to retinoic acid	2	17	0.18952	0.582723	1	1	1
GO:0141084	inflammasome-mediated signaling pathway	2	17	0.18952	0.582723	1	1	1
GO:0051928	positive regulation of calcium ion transport	3	33	0.20095	0.609276	1	1	1
GO:0070228	regulation of lymphocyte apoptotic process	3	33	0.20095	0.609276	1	1	1
GO:0043270	positive regulation of monoatomic ion transport	4	50	0.20627	0.609276	1	1	1
GO:0050921	positive regulation of chemotaxis	4	50	0.20627	0.609276	1	1	1
GO:0032733	positive regulation of interleukin-10 production	2	18	0.20708	0.609276	1	1	1
GO:0070229	negative regulation of lymphocyte apoptotic process	2	18	0.20708	0.609276	1	1	1
GO:0006935	chemotaxis	8	122	0.20914	0.609276	1	1	1
GO:0042330	taxis	8	122	0.20914	0.609276	1	1	1
GO:0002440	production of molecular mediator of immune response	7	104	0.21236	0.609276	1	1	1
GO:0070664	negative regulation of leukocyte proliferation	3	34	0.21345	0.609276	1	1	1
GO:0001818	negative regulation of cytokine production	6	86	0.21392	0.609276	1	1	1
GO:0002053	positive regulation of mesenchymal cell proliferation	1	5	0.21508	0.609276	1	1	1
GO:0002282	microglial cell activation involved in immune response	1	5	0.21508	0.609276	1	1	1
GO:0002551	mast cell chemotaxis	1	5	0.21508	0.609276	1	1	1
GO:0019731	antibacterial humoral response	1	5	0.21508	0.609276	1	1	1
GO:0022410	circadian sleep/wake cycle process	1	5	0.21508	0.609276	1	1	1
GO:0031620	regulation of fever generation	1	5	0.21508	0.609276	1	1	1
GO:0031622	positive regulation of fever generation	1	5	0.21508	0.609276	1	1	1
GO:0031650	regulation of heat generation	1	5	0.21508	0.609276	1	1	1
GO:0031652	positive regulation of heat generation	1	5	0.21508	0.609276	1	1	1
GO:0032741	positive regulation of interleukin-18 production	1	5	0.21508	0.609276	1	1	1
GO:0033631	cell-cell adhesion mediated by integrin	1	5	0.21508	0.609276	1	1	1
GO:0034145	positive regulation of toll-like receptor 4 signaling pathway	1	5	0.21508	0.609276	1	1	1
GO:0034238	macrophage fusion	1	5	0.21508	0.609276	1	1	1
GO:0035655	interleukin-18-mediated signaling pathway	1	5	0.21508	0.609276	1	1	1
GO:0035740	CD8-positive, alpha-beta T cell proliferation	1	5	0.21508	0.609276	1	1	1
GO:0035745	T-helper 2 cell cytokine production	1	5	0.21508	0.609276	1	1	1
GO:0036120	cellular response to platelet-derived growth factor stimulus	1	5	0.21508	0.609276	1	1	1
GO:0042749	regulation of circadian sleep/wake cycle	1	5	0.21508	0.609276	1	1	1
GO:0042753	positive regulation of circadian rhythm	1	5	0.21508	0.609276	1	1	1
GO:0043922	negative regulation by host of viral transcription	1	5	0.21508	0.609276	1	1	1
GO:0046007	negative regulation of activated T cell proliferation	1	5	0.21508	0.609276	1	1	1
GO:0060191	regulation of lipase activity	1	5	0.21508	0.609276	1	1	1
GO:0062100	positive regulation of programmed necrotic cell death	1	5	0.21508	0.609276	1	1	1
GO:0071318	cellular response to ATP	1	5	0.21508	0.609276	1	1	1
GO:0071351	cellular response to interleukin-18	1	5	0.21508	0.609276	1	1	1
GO:0072160	nephron tubule epithelial cell differentiation	1	5	0.21508	0.609276	1	1	1
GO:0072210	metanephric nephron development	1	5	0.21508	0.609276	1	1	1
GO:0110088	hippocampal neuron apoptotic process	1	5	0.21508	0.609276	1	1	1
GO:0140861	DNA repair-dependent chromatin remodeling	1	5	0.21508	0.609276	1	1	1
GO:1901223	negative regulation of non-canonical NF-kappaB signal transduction	1	5	0.21508	0.609276	1	1	1
GO:1903721	positive regulation of I-kappaB phosphorylation	1	5	0.21508	0.609276	1	1	1
GO:1904124	microglial cell migration	1	5	0.21508	0.609276	1	1	1
GO:1904139	regulation of microglial cell migration	1	5	0.21508	0.609276	1	1	1
GO:1904141	positive regulation of microglial cell migration	1	5	0.21508	0.609276	1	1	1
GO:2000310	regulation of NMDA receptor activity	1	5	0.21508	0.609276	1	1	1
GO:2000427	positive regulation of apoptotic cell clearance	1	5	0.21508	0.609276	1	1	1
GO:2000659	regulation of interleukin-1-mediated signaling pathway	1	5	0.21508	0.609276	1	1	1
GO:0006898	receptor-mediated endocytosis	4	51	0.21641	0.61104	1	1	1
GO:0016064	immunoglobulin mediated immune response	4	51	0.21641	0.61104	1	1	1
GO:0002714	positive regulation of B cell mediated immunity	2	19	0.22482	0.629642	1	1	1
GO:0002891	positive regulation of immunoglobulin mediated immune response	2	19	0.22482	0.629642	1	1	1
GO:0042531	positive regulation of tyrosine phosphorylation of STAT protein	2	19	0.22482	0.629642	1	1	1
GO:1901874	negative regulation of post-translational protein modification	2	19	0.22482	0.629642	1	1	1
GO:1903321	negative regulation of protein modification by small protein conjugation or removal	2	19	0.22482	0.629642	1	1	1
GO:0006511	ubiquitin-dependent protein catabolic process	4	52	0.22669	0.633852	1	1	1
GO:0007186	G protein-coupled receptor signaling pathway	7	107	0.23391	0.652983	1	1	1
GO:0001936	regulation of endothelial cell proliferation	3	36	0.23895	0.665977	1	1	1
GO:0051603	proteolysis involved in protein catabolic process	5	71	0.23937	0.666073	1	1	1
GO:0050900	leukocyte migration	8	127	0.24251	0.667622	1	1	1
GO:0042269	regulation of natural killer cell mediated cytotoxicity	2	20	0.24267	0.667622	1	1	1
GO:0045661	regulation of myoblast differentiation	2	20	0.24267	0.667622	1	1	1
GO:1904950	negative regulation of establishment of protein localization	2	20	0.24267	0.667622	1	1	1
GO:0019724	B cell mediated immunity	4	54	0.24764	0.667622	1	1	1
GO:0048584	positive regulation of response to stimulus	26	490	0.24945	0.667622	1	1	1
[truncated: 1,101 more rows]
