# Supplementary material for: Type I interferon signaling in microglia drives synaptic engulfment and neuronal loss following traumatic brain injury
Source: Research Square preprint supplement (doi:10.21203/rs.3.rs-9785030/v1), 2026-06-06
Supplement: Supplementary file 4 [file bac7f50d8415829a6954bdd8.xlsx]

## Sheet: Figure 2
Relative occupancy microglial Irf7				# Irf7+ cells/300mm2			Relative occupancy microglial Spp1				# Spp1+ cells/300mm2
Thalamus				Thalamus			Thalamus				Thalamus
Unpaired t-test				Unpaired t-test			Unpaired t-test				Unpaired t-test
P value	0.0358			P value	0.0013		P value	0.3347			P value	0.4079
P value summary	*			P value summary	**		P value summary	ns			P value summary	ns
Significantly different (P < 0.05)?	Yes			Significantly different (P < 0.05)?	Yes		Significantly different (P < 0.05)?	No			Significantly different (P < 0.05)?	No
One- or two-tailed P value?	Two-tailed			One- or two-tailed P value?	Two-tailed		One- or two-tailed P value?	Two-tailed			One- or two-tailed P value?	Two-tailed
t, df	t=2.466, df=9			t, df	t=4.596, df=9		t, df	t=1.019, df=9			t, df	t=0.8681, df=9
Mean of WT TBI	29.86			Mean of WT TBI	119		Mean of WT TBI	14.75			Mean of WT TBI	42.3
Mean of MG IFNAR KO TBI	6.415			Mean of MG IFNAR KO TBI	53.24		Mean of MG IFNAR KO TBI	5.399			Mean of MG IFNAR KO TBI	25.69
Difference between means (B - A) ± SEM	-23.44 ± 9.507			Difference between means (B - A) ± SEM	-65.71 ± 14.30		Difference between means (B - A) ± SEM	-9.352 ± 9.175			Difference between means (B - A) ± SEM	-16.61 ± 19.13
95% confidence interval	-44.95 to -1.936			95% confidence interval	-98.05 to -33.37		95% confidence interval	-30.11 to 11.40			95% confidence interval	-59.89 to 26.67
Hippocampus				Hippocampus			Hippocampus				Hippocampus
Unpaired t-test				Unpaired t-test			Unpaired t-test				Unpaired t-test
P value	0.0766			P value	0.0015		P value	0.1158			P value	0.0648
P value summary	ns			P value summary	**		P value summary	ns			P value summary	ns
Significantly different (P < 0.05)?	No			Significantly different (P < 0.05)?	Yes		Significantly different (P < 0.05)?	No			Significantly different (P < 0.05)?	No
One- or two-tailed P value?	Two-tailed			One- or two-tailed P value?	Two-tailed		One- or two-tailed P value?	Two-tailed			One- or two-tailed P value?	Two-tailed
t, df	t=2.033, df=8			t, df	t=4.739, df=8		t, df	t=1.764, df=8			t, df	t=2.140, df=8
Mean of WT TBI	17.79			Mean of WT TBI	131.9		Mean of WT TBI	12.03			Mean of WT TBI	33.29
Mean of MG IFNAR KO TBI	2.392			Mean of MG IFNAR KO TBI	20.05		Mean of MG IFNAR KO TBI	2.019			Mean of MG IFNAR KO TBI	4.341
Difference between means (B - A) ± SEM	-15.40 ± 7.577			Difference between means (B - A) ± SEM	-111.9 ± 23.60		Difference between means (B - A) ± SEM	-10.01 ± 5.677			Difference between means (B - A) ± SEM	-28.94 ± 13.53
95% confidence interval	-32.87 to 2.072			95% confidence interval	-166.3 to -57.43		95% confidence interval	-23.10 to 3.078			95% confidence interval	-60.13 to 2.245
Optic tract				Optic tract			Optic tract				Optic tract
Unpaired t-test				Unpaired t-test			Unpaired t-test				Unpaired t-test
P value	0.3			P value	0.1738		P value	0.1052			P value	0.5492
P value summary	ns			P value summary	ns		P value summary	ns			P value summary	ns
Significantly different (P < 0.05)?	No			Significantly different (P < 0.05)?	No		Significantly different (P < 0.05)?	No			Significantly different (P < 0.05)?	No
One- or two-tailed P value?	Two-tailed			One- or two-tailed P value?	Two-tailed		One- or two-tailed P value?	Two-tailed			One- or two-tailed P value?	Two-tailed
t, df	t=1.119, df=7			t, df	t=1.514, df=7		t, df	t=1.860, df=7			t, df	t=0.6292, df=7
Mean of WT TBI	1.797			Mean of WT TBI	25.31		Mean of WT TBI	23.08			Mean of WT TBI	43.1
Mean of MG IFNAR KO TBI	0.3602			Mean of MG IFNAR KO TBI	2.161		Mean of MG IFNAR KO TBI	15.38			Mean of MG IFNAR KO TBI	33.11
Difference between means (B - A) ± SEM	-1.437 ± 1.284			Difference between means (B - A) ± SEM	-23.15 ± 15.29		Difference between means (B - A) ± SEM	-7.697 ± 4.138			Difference between means (B - A) ± SEM	-9.990 ± 15.88
95% confidence interval	-4.472 to 1.599			95% confidence interval	-59.31 to 13.01		95% confidence interval	-17.48 to 2.088			95% confidence interval	-47.53 to 27.55

## Sheet: Figure 4
Total Hexb+/Cxcl10+ cells						Total Slc1a3+/Cxcl10+ cells
ANOVA summary						ANOVA summary
F	34.29					F	16.79
P value	<0.0001					P value	0.0001
P value summary	****					P value summary	***
Significant diff. among means (P < 0.05)?	Yes					Significant diff. among means (P < 0.05)?	Yes
R squared	0.8108					R squared	0.6773
Šídák's multiple comparisons test	Mean diff.	95.00% CI of diff.	Summary	Adjusted P Value		Šídák's multiple comparisons test	Mean diff.	95.00% CI of diff.	Summary	Adjusted P Value
Controls vs. WT TBI	-117.8	-157.1 to -78.39	****	<0.0001		Controls vs. WT TBI	-341.4	-499.7 to -183.0	****	<0.0001
Controls vs. MG IFNAR KO TBI	-24.93	-64.30 to 14.44	ns	0.2972		Controls vs. MG IFNAR KO TBI	-117.4	-275.7 to 40.99	ns	0.1847
WT TBI vs. MG IFNAR KO TBI	92.83	51.98 to 133.7	****	<0.0001		WT TBI vs. MG IFNAR KO TBI	224	59.68 to 388.3	**	0.0067
Regional Hexb+/Cxcl10+ cells						Regional Slc1a3+/Cxcl10+ cells
Thalamus						Thalamus
Unpaired t-test						Unpaired t-test
P value	0.0057					P value	0.0055
P value summary	**					P value summary	**
Significantly different (P < 0.05)?	Yes					Significantly different (P < 0.05)?	Yes
One- or two-tailed P value?	Two-tailed					One- or two-tailed P value?	Two-tailed
t, df	t=3.499, df=10					t, df	t=3.522, df=10
Mean of WT TBI	43.83					Mean of WT TBI	114.7
Mean of MG IFNAR KO TBI	16					Mean of MG IFNAR KO TBI	46.5
Difference between means (B - A) ± SEM	-27.83 ± 7.956					Difference between means (B - A) ± SEM	-68.17 ± 19.36
95% confidence interval	-45.56 to -10.11					95% confidence interval	-111.3 to -25.04
Hippocampus						Hippocampus
Unpaired t-test						Unpaired t-test
P value	0.0005					P value	0.0261
P value summary	***					P value summary	*
Significantly different (P < 0.05)?	Yes					Significantly different (P < 0.05)?	Yes
One- or two-tailed P value?	Two-tailed					One- or two-tailed P value?	Two-tailed
t, df	t=5.059, df=10					t, df	t=2.608, df=10
Mean of WT TBI	28					Mean of WT TBI	83
Mean of MG IFNAR KO TBI	3.5					Mean of MG IFNAR KO TBI	24.83
Difference between means (B - A) ± SEM	-24.50 ± 4.843					Difference between means (B - A) ± SEM	-58.17 ± 22.30
95% confidence interval	-35.29 to -13.71					95% confidence interval	-107.9 to -8.479
White Matter						White Matter
Unpaired t-test						Unpaired t-test
P value	0.1729					P value	0.2763
P value summary	ns					P value summary	ns
Significantly different (P < 0.05)?	No					Significantly different (P < 0.05)?	No
One- or two-tailed P value?	Two-tailed					One- or two-tailed P value?	Two-tailed
t, df	t=1.468, df=10					t, df	t=1.152, df=10
Mean of WT TBI	15.17					Mean of WT TBI	35.5
Mean of MG IFNAR KO TBI	4.333					Mean of MG IFNAR KO TBI	18.5
Difference between means (B - A) ± SEM	-10.83 ± 7.381					Difference between means (B - A) ± SEM	-17.00 ± 14.76
95% confidence interval	-27.28 to 5.612					95% confidence interval	-49.89 to 15.89
Cortex						Cortex
Unpaired t-test						Unpaired t-test
P value	0.013					P value	0.0009
P value summary	*					P value summary	***
Significantly different (P < 0.05)?	Yes					Significantly different (P < 0.05)?	Yes
One- or two-tailed P value?	Two-tailed					One- or two-tailed P value?	Two-tailed
t, df	t=3.014, df=10					t, df	t=4.636, df=10
Mean of WT TBI	21.67					Mean of WT TBI	74.17
Mean of MG IFNAR KO TBI	6.333					Mean of MG IFNAR KO TBI	32.67
Difference between means (B - A) ± SEM	-15.33 ± 5.088					Difference between means (B - A) ± SEM	-41.50 ± 8.952
95% confidence interval	-26.67 to -3.996					95% confidence interval	-61.45 to -21.55
Number of CD4 T cells						Number of CD8 T cells
3 Days Post Injury						3 Days Post Injury
Kruskal-Wallis test						ANOVA summary
P value	0.0001					F	14.09
Exact or approximate P value?	Approximate					P value	0.0002
P value summary	***					P value summary	***
Do the medians vary signif. (P < 0.05)?	Yes					Significant diff. among means (P < 0.05)?	Yes
Number of groups	3					R squared	0.5849
Kruskal-Wallis statistic	17.7
Dunn's multiple comparisons test	Mean rank diff.	Summary	Adjusted P Value			Šídák's multiple comparisons test	Mean diff.	95.00% CI of diff.	Summary	Adjusted P Value
Controls vs. WT TBI	-13.92	***	0.0002			Controls vs. WT TBI	-379.6	-568.8 to -190.3	***	0.0001
Controls vs. MG IFNAR KO TBI	-10.33	*	0.0206			Controls vs. MG IFNAR KO TBI	-219.4	-430.5 to -8.273	*	0.0402
WT TBI vs. MG IFNAR KO TBI	3.583	ns	>0.9999			WT TBI vs. MG IFNAR KO TBI	160.2	-69.03 to 389.4	ns	0.2307
7 Days Post Injury						7 Days Post Injury
ANOVA summary						Kruskal-Wallis test
F	32.46					P value	<0.0001
P value	<0.0001					Exact or approximate P value?	Approximate
P value summary	****					P value summary	****
Significant diff. among means (P < 0.05)?	Yes					Do the medians vary signif. (P < 0.05)?	Yes
R squared	0.6768					Number of groups	3
						Kruskal-Wallis statistic	19.89
Šídák's multiple comparisons test	Mean diff.	95.00% CI of diff.	Summary	Adjusted P Value		Dunn's multiple comparisons test	Mean rank diff.	Summary	Adjusted P Value
Controls vs. WT TBI	-292.5	-475.3 to -109.6	***	0.001		Controls vs. WT TBI	-13.14	**	0.0076
Controls vs. MG IFNAR KO TBI	-551.7	-727.5 to -375.9	****	<0.0001		Controls vs. MG IFNAR KO TBI	-17.06	***	0.0001
WT TBI vs. MG IFNAR KO TBI	-259.2	-466.5 to -51.96	*	0.0106		WT TBI vs. MG IFNAR KO TBI	-3.917	ns	>0.9999
35 Days Post Injury						35 Days Post Injury
Kruskal-Wallis test						Kruskal-Wallis test
P value	0.0007					P value	0.1288
Exact or approximate P value?	Approximate					Exact or approximate P value?	Approximate
P value summary	***					P value summary	ns
Do the medians vary signif. (P < 0.05)?	Yes					Do the medians vary signif. (P < 0.05)?	No
Number of groups	3					Number of groups	3
Kruskal-Wallis statistic	14.54					Kruskal-Wallis statistic	4.1
Dunn's multiple comparisons test	Mean rank diff.	Summary	Adjusted P Value			Dunn's multiple comparisons test	Mean rank diff.	Summary	Adjusted P Value
Controls vs. WT TBI	-10.57	*	0.0226			Controls vs. WT TBI	ns	0.9036
Controls vs. MG IFNAR KO TBI	-14.38	**	0.0014			Controls vs. MG IFNAR KO TBI	ns	0.1375
WT TBI vs. MG IFNAR KO TBI	-3.813	ns	>0.9999			WT TBI vs. MG IFNAR KO TBI	ns	>0.9999
Regional T cell counts						Regional Proportion of T cells
Thalamus						Thalamus
Unpaired t-test						Unpaired t-test
P value	0.2709					P value	0.1416
P value summary	ns					P value summary	ns
Significantly different (P < 0.05)?	No					Significantly different (P < 0.05)?	No
One- or two-tailed P value?	Two-tailed					One- or two-tailed P value?	Two-tailed
t, df	t=1.212, df=6					t, df	t=1.692, df=6
Mean of WT TBI	13					Mean of WT TBI	14.27
Mean of MG IFNAR KO TBI	6					Mean of MG IFNAR KO TBI	5.606
Difference between means (B - A) ± SEM	-7.000 ± 5.774					Difference between means (B - A) ± SEM	-8.661 ± 5.118
95% confidence interval	-21.13 to 7.127					95% confidence interval	-21.18 to 3.863
Hippocampus						Hippocampus
Unpaired t-test						Unpaired t-test
P value	0.1616					P value	0.0453
P value summary	ns					P value summary	*
Significantly different (P < 0.05)?	No					Significantly different (P < 0.05)?	Yes
One- or two-tailed P value?	Two-tailed					One- or two-tailed P value?	Two-tailed
t, df	t=1.596, df=6					t, df	t=2.520, df=6
Mean of WT TBI	16.75					Mean of WT TBI	19.51
Mean of MG IFNAR KO TBI	7.75					Mean of MG IFNAR KO TBI	8.155
Difference between means (B - A) ± SEM	-9.000 ± 5.638					Difference between means (B - A) ± SEM	-11.36 ± 4.508
95% confidence interval	-22.80 to 4.797					95% confidence interval	-22.39 to -0.3275
White Matter						White Matter
Unpaired t-test						Unpaired t-test
P value	0.2536					P value	0.0762
P value summary	ns					P value summary	ns
Significantly different (P < 0.05)?	No					Significantly different (P < 0.05)?	No
One- or two-tailed P value?	Two-tailed					One- or two-tailed P value?	Two-tailed
t, df	t=1.262, df=6					t, df	t=2.140, df=6
Mean of WT TBI	20.5					Mean of WT TBI	23.24
Mean of MG IFNAR KO TBI	10.75					Mean of MG IFNAR KO TBI	11.53
Difference between means (B - A) ± SEM	-9.750 ± 7.723					Difference between means (B - A) ± SEM	-11.72 ± 5.476
95% confidence interval	-28.65 to 9.148					95% confidence interval	-25.11 to 1.683
Cortex						Cortex
Unpaired t-test						Unpaired t-test
P value	0.1595					P value	0.0113
P value summary	ns					P value summary	*
Significantly different (P < 0.05)?	No					Significantly different (P < 0.05)?	Yes
One- or two-tailed P value?	Two-tailed					One- or two-tailed P value?	Two-tailed
t, df	t=1.605, df=6					t, df	t=3.606, df=6
Mean of WT TBI	19.75					Mean of WT TBI	22.71
Mean of MG IFNAR KO TBI	35					Mean of MG IFNAR KO TBI	44.02
Difference between means (B - A) ± SEM	15.25 ± 9.499					Difference between means (B - A) ± SEM	21.31 ± 5.909
95% confidence interval	-7.993 to 38.49					95% confidence interval	6.851 to 35.77
Extra Parenchymal						Extra Parenchymal
Unpaired t-test						Unpaired t-test
P value	0.3858					P value	0.1226
P value summary	ns					P value summary	ns
Significantly different (P < 0.05)?	No					Significantly different (P < 0.05)?	No
One- or two-tailed P value?	Two-tailed					One- or two-tailed P value?	Two-tailed
t, df	t=0.9351, df=6					t, df	t=1.796, df=6
Mean of WT TBI	16					Mean of WT TBI	18.19
Mean of MG IFNAR KO TBI	22					Mean of MG IFNAR KO TBI	28.01
Difference between means (B - A) ± SEM	6.000 ± 6.416					Difference between means (B - A) ± SEM	9.821 ± 5.468
95% confidence interval	-9.700 to 21.70					95% confidence interval	-3.560 to 23.20

## Sheet: Figure 5
IBA1 proportional area						# H2-K1+ cells/300mm2						Relative occupancy microglial H2-K1
Thalamus						Thalamus						Thalamus
ANOVA summary						ANOVA summary						ANOVA summary
F	32.8					F	37.24					F	24.54
P value	<0.0001					P value	<0.0001					P value	<0.0001
P value summary	****					P value summary	****					P value summary	****
Significant diff. among means (P < 0.05)?	Yes					Significant diff. among means (P < 0.05)?	Yes					Significant diff. among means (P < 0.05)?	Yes
R squared	0.8039					R squared	0.8232					R squared	0.7542
Šídák's multiple comparisons test	Mean diff.	95.00% CI of diff.	Summary	Adjusted P Value		Šídák's multiple comparisons test	Mean diff.	95.00% CI of diff.	Summary	Adjusted P Value		Šídák's multiple comparisons test	Mean diff.	95.00% CI of diff.	Summary	Adjusted P Value
Controls vs. WT TBI	-8.39	-11.20 to -5.583	****	<0.0001		Controls vs. WT TBI	-116	-152.3 to -79.75	****	<0.0001		Controls vs. WT TBI	-15.09	-21.64 to -8.539	****	<0.0001
Controls vs. MG IFNAR KO TBI	-4.562	-7.221 to -1.904	***	0.0009		Controls vs. MG IFNAR KO TBI	-28.44	-62.82 to 5.947	ns	0.1223		Controls vs. MG IFNAR KO TBI	1.388	-4.819 to 7.595	ns	0.9145
WT TBI vs. MG IFNAR KO TBI	3.828	0.8467 to 6.808	*	0.0105		WT TBI vs. MG IFNAR KO TBI	87.61	49.06 to 126.2	****	<0.0001		WT TBI vs. MG IFNAR KO TBI	16.48	9.520 to 23.44	****	<0.0001
Hippocampus						Hippocampus						Hippocampus
ANOVA summary						ANOVA summary						ANOVA summary
F	13.79					F	18.61					F	10.16
P value	0.0003					P value	<0.0001					P value	0.0014
P value summary	***					P value summary	****					P value summary	**
Significant diff. among means (P < 0.05)?	Yes					Significant diff. among means (P < 0.05)?	Yes					Significant diff. among means (P < 0.05)?	Yes
R squared	0.6329					R squared	0.7128					R squared	0.5595
Šídák's multiple comparisons test	Mean diff.	95.00% CI of diff.	Summary	Adjusted P Value		Šídák's multiple comparisons test	Mean diff.	95.00% CI of diff.	Summary	Adjusted P Value		Šídák's multiple comparisons test	Mean diff.	95.00% CI of diff.	Summary	Adjusted P Value
Controls vs. WT TBI	-6.577	-9.950 to -3.203	***	0.0003		Controls vs. WT TBI	-43.2	-63.52 to -22.87	***	0.0001		Controls vs. WT TBI	-12.7	-20.88 to -4.517	**	0.0023
Controls vs. MG IFNAR KO TBI	-3.379	-6.575 to -0.1826	*	0.0367		Controls vs. MG IFNAR KO TBI	-1.085	-19.01 to 16.84	ns	0.998		Controls vs. MG IFNAR KO TBI	-0.1207	-7.870 to 7.628	ns	>0.9999
WT TBI vs. MG IFNAR KO TBI	3.198	-0.3854 to 6.781	ns	0.0879		WT TBI vs. MG IFNAR KO TBI	42.11	20.69 to 63.53	***	0.0003		WT TBI vs. MG IFNAR KO TBI	12.58	3.888 to 21.27	**	0.0042
Corpus Callosum						Corpus Callosum						Corpus Callosum
ANOVA summary						Kruskal-Wallis test						ANOVA summary
F	23.6					P value	0.0015					F	5.143
P value	<0.0001					Exact or approximate P value?	Exact					P value	0.0188
P value summary	****					P value summary	**					P value summary	*
Significant diff. among means (P < 0.05)?	Yes					Do the medians vary signif. (P < 0.05)?	Yes					Significant diff. among means (P < 0.05)?	Yes
R squared	0.7469					Number of groups	3					R squared	0.3913
						Kruskal-Wallis statistic	10.51
Šídák's multiple comparisons test	Mean diff.	95.00% CI of diff.	Summary	Adjusted P Value		Dunn's multiple comparisons test	Mean rank diff.	Summary	Adjusted P Value			Šídák's multiple comparisons test	Mean diff.	95.00% CI of diff.	Summary	Adjusted P Value
Controls vs. WT TBI	-6.095	-9.144 to -3.047	***	0.0002		Controls vs. WT TBI	-10.35	**	0.0037			Controls vs. WT TBI	-5.837	-10.74 to -0.9390	*	0.0175
Controls vs. MG IFNAR KO TBI	-6.641	-9.529 to -3.753	****	<0.0001		Controls vs. MG IFNAR KO TBI	-3.25	ns	0.8521			Controls vs. MG IFNAR KO TBI	-1.531	-6.172 to 3.109	ns	0.7755
WT TBI vs. MG IFNAR KO TBI	-0.5459	-3.784 to 2.692	ns	0.9604		WT TBI vs. MG IFNAR KO TBI	7.1	ns	0.1106			WT TBI vs. MG IFNAR KO TBI	4.306	-0.8968 to 9.509	ns	0.1219
MHC I MFI						MHC II MFI
ANOVA summary						ANOVA summary
F	5.174					F	2.844
P value	0.0361					P value	0.1167
P value summary	*					P value summary	ns
Significant diff. among means (P < 0.05)?	Yes					Significant diff. among means (P < 0.05)?	No
R squared	0.564					R squared	0.4156
Šídák's multiple comparisons test	Mean diff.	95.00% CI of diff.	Summary	Adjusted P Value		Šídák's multiple comparisons test	Mean diff.	95.00% CI of diff.	Summary	Adjusted P Value
Controls vs. WT TBI	-10580	-20488 to -671.0	*	0.0369		Controls vs. WT TBI	-289.2	-2367 to 1788	ns	0.9693
Controls vs. MG IFNAR KO TBI	-6035	-16738 to 4668	ns	0.3385		Controls vs. MG IFNAR KO TBI	-1699	-3943 to 544.8	ns	0.1493
WT TBI vs. MG IFNAR KO TBI	4545	-6158 to 15247	ns	0.5572		WT TBI vs. MG IFNAR KO TBI	-1410	-3654 to 834.1	ns	0.2606

## Sheet: Figure 6
Microglial T cell cluster % of cells
ANOVA summary
F	30.03
P value	<0.0001
P value summary	****
Significant diff. among means (P < 0.05)?	Yes
R squared	0.8573
Šídák's multiple comparisons test	Mean diff.	95.00% CI of diff.	Summary	Adjusted P Value
Controls vs. WT TBI	-1.384	-1.902 to -0.8666	****	<0.0001
Controls vs. MG IFNAR KO TBI	-0.782	-1.349 to -0.2152	**	0.0082
WT TBI vs. MG IFNAR KO TBI	0.602	-0.01020 to 1.214	ns	0.0542
MG-T cell count						MG-T cell proportion
ANOVA summary						ANOVA summary
F	4.763					F	5.654
P value	0.0434					P value	0.0295
P value summary	*					P value summary	*
Significant diff. among means (P < 0.05)?	Yes					Significant diff. among means (P < 0.05)?	Yes
R squared	0.5435					R squared	0.5857
Šídák's multiple comparisons test	Mean diff.	95.00% CI of diff.	Summary	Adjusted P Value		Šídák's multiple comparisons test	Mean diff.	95.00% CI of diff.	Summary	Adjusted P Value
Controls vs. WT TBI	-40.75	-81.51 to 0.009263	ns	0.0501		Controls vs. WT TBI	-0.07638	-0.1449 to -0.007820	*	0.0301
Controls vs. MG IFNAR KO TBI	-11.17	-55.19 to 32.86	ns	0.8493		Controls vs. MG IFNAR KO TBI	-0.04521	-0.1193 to 0.02883	ns	0.2804
WT TBI vs. MG IFNAR KO TBI	29.58	-14.44 to 73.61	ns	0.2167		WT TBI vs. MG IFNAR KO TBI	0.03116	-0.04289 to 0.1052	ns	0.5639

## Sheet: Figure 7
MBP+ Microglia # of cells						SNAP25+ Microglia # of cells
ANOVA summary						ANOVA summary
F	12.17					F	11.9
P value	0.0002					P value	0.0003
P value summary	***					P value summary	***
Significant diff. among means (P < 0.05)?	Yes					Significant diff. among means (P < 0.05)?	Yes
R squared	0.5141					R squared	0.5196
Šídák's multiple comparisons test	Mean diff.	95.00% CI of diff.	Summary	Adjusted P Value		Šídák's multiple comparisons test	Mean diff.	95.00% CI of diff.	Summary	Adjusted P Value
Controls vs. WT TBI	-2343	-3635 to -1052	***	0.0003		Controls vs. WT TBI	-1772	-2732 to -812.0	***	0.0003
Controls vs. MG IFNAR KO TBI	-1457	-2636 to -277.8	*	0.0124		Controls vs. MG IFNAR KO TBI	-302.4	-1182 to 576.7	ns	0.7659
WT TBI vs. MG IFNAR KO TBI	886.6	-508.3 to 2282	ns	0.3077		WT TBI vs. MG IFNAR KO TBI	1470	448.0 to 2491	**	0.0036
MBP+ Mono/Mac # of cells						SNAP25+ Mono/Mac # of cells
ANOVA summary						ANOVA summary
F	4.157					F	15.42
P value	0.0288					P value	<0.0001
P value summary	*					P value summary	****
Significant diff. among means (P < 0.05)?	Yes					Significant diff. among means (P < 0.05)?	Yes
R squared	0.2655					R squared	0.5728
Šídák's multiple comparisons test	Mean diff.	95.00% CI of diff.	Summary	Adjusted P Value		Šídák's multiple comparisons test	Mean diff.	95.00% CI of diff.	Summary	Adjusted P Value
Controls vs. WT TBI	-1218	-2431 to -4.716	*	0.0489		Controls vs. WT TBI	-959.3	-1411 to -507.2	****	<0.0001
Controls vs. MG IFNAR KO TBI	-918.3	-2026 to 189.4	ns	0.1255		Controls vs. MG IFNAR KO TBI	-468.8	-881.5 to -56.15	*	0.0227
WT TBI vs. MG IFNAR KO TBI	299.8	-1011 to 1610	ns	0.9158		WT TBI vs. MG IFNAR KO TBI	490.4	2.124 to 978.7	*	0.0488

## Sheet: Figure 8
NeuN+ Cell Count
7 Days Post Injury
ANOVA summary
F	7.65
P value	0.0037
P value summary	**
Significant diff. among means (P < 0.05)?	Yes
R squared	0.4461
Šídák's multiple comparisons test	Mean diff.	95.00% CI of diff.	Summary	Adjusted P Value
Controls vs. WT TBI	26.69	8.830 to 44.56	**	0.0028
Controls vs. MG IFNAR KO TBI	9.557	-8.306 to 27.42	ns	0.4437
WT TBI vs. MG IFNAR KO TBI	-17.14	-37.11 to 2.836	ns	0.1065
38 Days Post Injury
ANOVA summary
F	8.112
P value	0.0028
P value summary	**
Significant diff. among means (P < 0.05)?	Yes
R squared	0.4606
Šídák's multiple comparisons test	Mean diff.	95.00% CI of diff.	Summary	Adjusted P Value
Controls vs. WT TBI	17.89	5.494 to 30.29	**	0.0038
Controls vs. MG IFNAR KO TBI	11.48	-0.1901 to 23.14	ns	0.0547
WT TBI vs. MG IFNAR KO TBI	-6.416	-20.33 to 7.503	ns	0.5653
Barnes Maze Training						Barnes Maze Probe
2way ANOVA						Escape Hole Time
Source of Variation	% of total variation	P value	P value summary			Kruskal-Wallis test
Time x Condition	1.505	0.2797	ns			P value	0.0211
Time	44.09	<0.0001	****			Exact or approximate P value?	Approximate
Condition	3.52	0.0072	**			P value summary	*
Subject	20.33	<0.0001	****			Do the medians vary signif. (P < 0.05)?	Yes
						Number of groups	4
Tukey's multiple comparisons test	Mean diff.	95.00% CI of diff.				Kruskal-Wallis statistic	9.722
Day 1	Mean diff.	95.00% CI of diff.	Summary	Adjusted P Value		Dunn's multiple comparisons test	Mean rank diff.	Summary	Adjusted P Value
WT control vs. WT TBI	-4.317	-19.07 to 10.44	**	0.0038		WT control vs. WT TBI	13.44	ns	0.1931
WT control vs. MG IFNAR KO control	8.059	-9.591 to 25.71	ns	0.6098		MG IFNAR KO control vs. MG IFNAR KO TBI	4.722	ns	>0.9999
WT control vs. MG IFNAR KO TBI	-1.049	-16.23 to 14.13	ns	0.9977		WT TBI vs. MG IFNAR KO TBI	-16.74	ns	0.0543
WT TBI vs. MG IFNAR KO control	12.38	-4.484 to 29.24	ns	0.2132
WT TBI vs. MG IFNAR KO TBI	3.268	-10.91 to 17.45	ns	0.9258		Probe Latency
MG IFNAR KO control vs. MG IFNAR KO TBI	-9.108	-26.32 to 8.105	ns	0.4895		Kruskal-Wallis test
						P value	0.0003
Day 2						Exact or approximate P value?	Approximate
WT control vs. WT TBI	-15.97	-31.81 to -0.1311	*	0.0475		P value summary	***
WT control vs. MG IFNAR KO control	-10.5	-28.13 to 7.134	ns	0.3856		Do the medians vary signif. (P < 0.05)?	Yes
WT control vs. MG IFNAR KO TBI	-14.82	-28.32 to -1.325	*	0.0267		Number of groups	4
WT TBI vs. MG IFNAR KO control	5.475	-13.02 to 23.97	ns	0.8547		Kruskal-Wallis statistic	18.65
WT TBI vs. MG IFNAR KO TBI	1.149	-13.55 to 15.85	ns	0.9966
MG IFNAR KO control vs. MG IFNAR KO TBI	-4.326	-21.00 to 12.35	ns	0.8932		Dunn's multiple comparisons test	Mean rank diff.	Summary	Adjusted P Value
						WT control vs. WT TBI	-25.59	**	0.0012
Day 3						MG IFNAR KO control vs. MG IFNAR KO TBI	-18.24	*	0.0391
WT control vs. WT TBI	-10.09	-23.75 to 3.566	ns	0.2084		WT TBI vs. MG IFNAR KO TBI	3.81	ns	>0.9999
WT control vs. MG IFNAR KO control	0.8915	-11.30 to 13.09	ns	0.9972
WT control vs. MG IFNAR KO TBI	-4.23	-12.68 to 4.221	ns	0.5367
WT TBI vs. MG IFNAR KO control	10.98	-4.382 to 26.35	ns	0.2362
WT TBI vs. MG IFNAR KO TBI	5.863	-7.049 to 18.78	ns	0.6057
MG IFNAR KO control vs. MG IFNAR KO TBI	-5.121	-16.46 to 6.217	ns	0.6066
Day 4
WT control vs. WT TBI	-5.159	-13.63 to 3.312	ns	0.3706
WT control vs. MG IFNAR KO control	5.268	-2.124 to 12.66	ns	0.2375
WT control vs. MG IFNAR KO TBI	-1.717	-8.848 to 5.415	ns	0.9156
WT TBI vs. MG IFNAR KO control	10.43	2.211 to 18.64	**	0.0082
WT TBI vs. MG IFNAR KO TBI	3.443	-4.551 to 11.44	ns	0.6555
MG IFNAR KO control vs. MG IFNAR KO TBI	-6.985	-13.79 to -0.1755	*	0.0426
